# Supplementary material for: MOXD2, a Gene Possibly Associated with Olfaction, Is Frequently Inactivated in Birds
Source: PubMed Central journal article supplement (PMC4830563; doi:10.1371/journal.pone.0152431), 2016-04-13
Supplement: pone.0152431.s001.pdf [file pone.0152431.s001.pdf]

# S1 Fig. Summary of bird *MOXD2* genes

## 1. Rifleman (*Acanthisitta chloris*)

```
>Acanthisitta_chloris No=1 length=1836 name="Rifleman"
ATGATGGCAATTGTCTTCTCGAGAATCAAGAGGATGTTCTTCTTCTTCCCATGCTTTTGTCTG
GTCAGCTTGCACCTCCACCGCTGCGTTTCTCCACTTTCCTGGATCCTTCCAACATGGTCTACCTCCACTG
GGACCATGATGATCAGGAGCTGATGACATTTGAGCTGCAGGTCCATACAACCTGGCTGGGTGGCATTGGA
TTCAGCCCTCATGGAGAGTTGCCTGGATCTGACATTGTGATAGGAGGTGTCTTCCCAAATGGCAGCATCT
ACTTCTCTGATTGTACATGGAAGGTGAGGCAACCCCTTGAGGAAAGATGAGAGCCAGGACTACCAACTGCT
GTCAGTGACAGAGAACAAAACCTCCACCACCATGTCGTTCAAACGTCACCTCCGGACGTGTGACACAAAT
GACCTGGATATCACAATGGACACAGCCCATCTTGTGTGCTGCATTTGGCACTGATGACACAGTCCAATTCT
TTAAAAGCCAAAGATTTTCCAGATCTCTTTTCTGATGAGGTACAAAAGCCCATCTGACTCAACTGACCC
CAAAGTATTCTTACCTATGACCTGAGGCTGGACAACCTTGTGTTCAGTAGAAGAAACGACGTATGCC
TGTACCTTTTATCCCCTGCCCATGGTCAAGCAGAAACACCACATCTACAAGTTTGAACCTGTAATAACAT
CCCACAATATAACCTTGGTTTCATCATATTCTTGTATGCTGTGGCAACTCCAGCATCCTACCCAGTGG
CATAGGTGATTGCTATGGAGCCAATCCAGATTTTTCCCTGTGCTCTCAGGTCCTTGTGGGCTGGGCTGTT
GGAGGAGAGTCTATCAATTTCCAGATGAAGCTGCAGTTTTCCATAGGGACACCTTGGGACCCCTCAGTACA
TACGACTGGAAATCCATTACAGCAATCTTGACTTGTACCAGGCTTGATTGACAGCTCAGGGATACGAAT
CTACTACACACCAGAGCTACGGAAATATGATGTGGGGGTTCTGCAAAACAGGTGTCTTCATTTTCCCTGCA
CATTTTCATTCTCTGGAGCAGAATCCTACAGATCTTACGGTCTTTGCAATTCAGCCAGTTCGACGAAA
TGAATGGGATGCTGGTTCCAGATCTCCATGTCTTTGCCTATCTGCTTCACACTCACCTGTCTGGCAGAGG
AGTGAAGTGGTTCATACACCGGAACGGTGCAGCAGCTGAGGATCATCTGTGAGGACAATAAGTATGACTTC
AGGCTGCAGGAAATCCGGACACGAAGGAAATCCTCACAATTAACCAGGGGATGAAATCCTGACTGAAT
GCAACTTTCAAACACTGGATCGGTGAGGGGTTACTTTTGGTGGGCTAAGCACCATGAATGAGATGTGCCCT
TGCATTCCTCTTCTACTACCTCGTAACAACATCTCCAGTTGCATGGGCTACCCAGACATTTTGTATGTT
GCACACACAGTCAAGCAGGAGGCTCAGATGCATTGGAAGGAATGATGGCCATGAACTTTGTGACTGGG
ATGATGATACTGTCAAAATTCAGAGAAAAGCTGCCAAGGAGGCAAAACCAAGTGGTTCGTGATTAACCAT
CAATGAGCTCCAGAGAAATGAGAGTGGTCTCATCAGAGATATCAGTATTCAGAGCAGGCTGCCGTGCAC
AATATTTCTGGACATGTCTCCCTATCAGATCTGAGGGTCACTGCAATAGACACTTCAGAGTCATCAACCA
CCAAAGAAACTGCTTCACTTCTCTTCTCTCTCACACAGCTGGTGTGTGCTTGGCTTATCTTGGCCTC
TGAGTACGAAAAGTGA
```

```
>Acanthisitta_chloris No=1 length=611 name="Rifleman"
MMAIVFSRIKRMFFLLFFPCFCSQLAPPPLRFSTFLDPSNMVYLHWDHDDQELMTFELQVHTTGWVAFG
FSPHGELPGSDIVIGGVFPNGSIYFSDCHMEGEATLEEDESQDYQLLSVTENKTSTTMSFKRHLRCDTN
DLDITMDTAHLVAAFVGTDDTVQFFKSRFSRSLFLMRYKSPSDSTDPKVFFTYDLRLDNFAVPVEETTYA
CTFIPLPMVKQKHIIYKFEPVITSHNITLVHHILVYACGNSSILPSGIGDCYGANPDFSLCSQVLGVAV
GGESYQFPDEAAVSIPTWDPQYIRLEIHYSNLDDLPLGLIDSSGIRIYYTPELRKYDVGVLQTVGFIFPA
HFIPPGAESYRSYGLCNSSQFDEMNGMLVPLDHLVFAVLLHTHLSGRGVKVVQYRNQEQLRIICEDNKYDF
RLQEIRDTEKILTIKPGDEILTECNFQTLDRSGVTFGGLSTMNEMCLAFIFYPRNNISSCMGYPDILYV
AHTVKQEASDALEGMAMNFVDWDDDTVKIAEKAKEANQVVVIKTINELQRNESGLIRDISIPEQAACH
NISGHVLSLSDLRVTAIDTSESSTTKETASLPLLSLTQLVFAWLLILASEYEK
```

| Exon | NCBI Accession | Strand | Start | End   |
|------|----------------|--------|-------|-------|
| 1    | JJRS01053877.1 | -      | 17154 | 17441 |
| 2    | JJRS01053877.1 | -      | 15105 | 15251 |
| 3    | JJRS01053877.1 | -      | 14161 | 14322 |
| 4    | JJRS01053877.1 | -      | 12553 | 12636 |
| 5    | JJRS01053877.1 | -      | 10782 | 10949 |
| 6    | JJRS01053877.1 | -      | 9766  | 9868  |
| 7    | JJRS01053877.1 | -      | 8436  | 8602  |

|    |                |   |      |      |
|----|----------------|---|------|------|
| 8  | JJRS01053877.1 | - | 6597 | 6688 |
| 9  | JJRS01053877.1 | - | 5352 | 5448 |
| 10 | JJRS01053877.1 | - | 5075 | 5134 |
| 11 | JJRS01053877.1 | - | 3740 | 3870 |
| 12 | JJRS01053877.1 | - | 3352 | 3466 |
| 13 | JJRS01053877.1 | - | 2439 | 2660 |

## 2. Golden-collared manakin (*Manacus vitellinus*)

| Exon | NCBI Accession | Strand | Start | End  |                                 |
|------|----------------|--------|-------|------|---------------------------------|
| 1    | JMFM02043338.1 | -      | 8540  | 8807 | 17-nt deletion, splice donor GG |
| 2    |                |        |       |      | exon deletion                   |
| 3    |                |        |       |      | exon deletion                   |
| 4    |                |        |       |      | exon deletion                   |
| 5    |                |        |       |      | exon deletion                   |
| 6    |                |        |       |      | exon deletion                   |
| 7    |                |        |       |      | exon deletion                   |
| 8    |                |        |       |      | exon deletion                   |
| 9    |                |        |       |      | exon deletion                   |
| 10   |                |        |       |      | exon deletion                   |
| 11   |                |        |       |      | exon deletion                   |
| 12   |                |        |       |      | exon deletion                   |
| 13   | JMFM02004428.1 | +      | 1320  | 1559 |                                 |

## 3. American crow (*Corvus brachyrhynchos*)

| Exon | NCBI Accession | Strand | Start | End   |                                                                     |
|------|----------------|--------|-------|-------|---------------------------------------------------------------------|
| 1    | JMFN01085921.1 | +      | 35028 | 35314 | 1-nt deletion, 1 nonsense codon                                     |
| 2    | JMFN01029801.1 | -      | 30613 | 30750 | translocation, 1-nt deletion, 2-nt deletion                         |
| 3    | JMFN01085921.1 | +      | 36856 | 36948 | 5' deletion (69 nt)                                                 |
| 4    |                |        |       |       | exon deletion                                                       |
| 5    |                |        |       |       | exon deletion                                                       |
| 6    |                |        |       |       | exon deletion                                                       |
| 7    |                |        |       |       | exon deletion                                                       |
| 8    |                |        |       |       | exon deletion                                                       |
| 9    |                |        |       |       | exon deletion                                                       |
| 10   |                |        |       |       | exon deletion                                                       |
| 11   |                |        |       |       | exon deletion                                                       |
| 12   | JMFN01085927.1 | -      | 1788  | 1865  | translocation, 5' deletion (27-nt), 10-nt deletion, splice donor GG |
| 13   | JMFN01085921.1 | +      | 38482 | 38660 | 5' deletion (54 nt), 1-nt deletion                                  |

#### 4. Hooded crow (*Corvus cornix cornix*)

| Exon | NCBI Accession | Strand | Start  | End    |                                                                     |
|------|----------------|--------|--------|--------|---------------------------------------------------------------------|
| 1    | JPSR01026093.1 | -      | 67948  | 68234  | 1-nt deletion, 1 nonsense codon                                     |
| 2    | JPSR01014826.1 | +      | 113810 | 113947 | translocation, 1-nt deletion, 2-nt deletion                         |
| 3    | JPSR01026093.1 | -      | 66314  | 66406  | 5' deletion (69 nt)                                                 |
| 4    |                |        |        |        | exon deletion                                                       |
| 5    |                |        |        |        | exon deletion                                                       |
| 6    |                |        |        |        | exon deletion                                                       |
| 7    |                |        |        |        | exon deletion                                                       |
| 8    |                |        |        |        | exon deletion                                                       |
| 9    |                |        |        |        | exon deletion                                                       |
| 10   |                |        |        |        | exon deletion                                                       |
| 11   |                |        |        |        | exon deletion                                                       |
| 12   | JPSR01026093.1 | +      | 42743  | 42820  | translocation, 5' deletion (27 nt), 10-nt deletion, splice donor GG |
| 13   | JPSR01026093.1 | -      | 64596  | 64774  | 5' deletion (54 nt), 1-nt deletion                                  |

#### 5. Ground tit (*Pseudopodoces humilis*)

| Exon | NCBI Accession | Strand | Start | End   |                                                                     |
|------|----------------|--------|-------|-------|---------------------------------------------------------------------|
| 1    | ANZD01002549.1 | -      | 90630 | 90914 | 1-nt deletion, 2-nt deletion                                        |
| 2    | ANZD01025988.1 | +      | 41973 | 42085 | translocation, 5' deletion (25 nt), 1 nonsense codon, 2-nt deletion |
| 3    | ANZD01002549.1 | -      | 88982 | 89074 | 5' deletion (69 nt)                                                 |
| 4    |                |        |       |       | exon deletion                                                       |
| 5    |                |        |       |       | exon deletion                                                       |
| 6    |                |        |       |       | exon deletion                                                       |
| 7    |                |        |       |       | exon deletion                                                       |
| 8    |                |        |       |       | exon deletion                                                       |
| 9    |                |        |       |       | exon deletion                                                       |
| 10   |                |        |       |       | exon deletion                                                       |
| 11   |                |        |       |       | exon deletion                                                       |
| 12   |                |        |       |       | exon deletion                                                       |
| 13   | ANZD01002549.1 | -      | 87243 | 87427 | 5' deletion (55 nt)                                                 |

#### 6. Collared flycatcher (*Ficedula albicollis*)

| Exon | NCBI Accession | Strand | Start  | End    |                                       |
|------|----------------|--------|--------|--------|---------------------------------------|
| 1    | AGTO02001188.1 | -      | 9186   | 9472   | 1 nonsense codon, 1-nt deletion       |
| 2    | AGTO02000237.1 | -      | 317365 | 317511 | translocation, 2 nonsense codons      |
| 3    | AGTO02001188.1 | -      | 7512   | 7609   | 5' deletion (64 nt), 1 nonsense codon |
| 4    |                |        |        |        | exon deletion                         |

|    |                |   |      |      |                      |
|----|----------------|---|------|------|----------------------|
| 5  |                |   |      |      | exon deletion        |
| 6  |                |   |      |      | exon deletion        |
| 7  |                |   |      |      | exon deletion        |
| 8  |                |   |      |      | exon deletion        |
| 9  |                |   |      |      | exon deletion        |
| 10 |                |   |      |      | exon deletion        |
| 11 |                |   |      |      | exon deletion        |
| 12 |                |   |      |      | exon deletion        |
| 13 | AGTO02001188.1 | - | 5835 | 5939 | 5' deletion (117 nt) |

## 7. Zebra finch (*Taeniopygia guttata*)

| Exon | NCBI Accession | Strand | Start | End   |                                                 |
|------|----------------|--------|-------|-------|-------------------------------------------------|
| 1    | ABQF01036336.1 | -      | 16726 | 17004 | 1-nt deletion, 1-nt insertion, 1 nonsense codon |
| 2    | ABQF01007442.1 | -      | 13688 | 13833 | translocation, 1 nonsense codon, 1-nt deletion  |
| 3    | ABQF01036336.1 | -      | 15058 | 15155 | 5' deletion (64 nt)                             |
| 4    |                |        |       |       | exon deletion                                   |
| 5    |                |        |       |       | exon deletion                                   |
| 6    |                |        |       |       | exon deletion                                   |
| 7    |                |        |       |       | exon deletion                                   |
| 8    |                |        |       |       | exon deletion                                   |
| 9    |                |        |       |       | exon deletion                                   |
| 10   |                |        |       |       | exon deletion                                   |
| 11   |                |        |       |       | exon deletion                                   |
| 12   |                |        |       |       | exon deletion                                   |
| 13   | ABQF01036336.1 | -      | 13416 | 13594 | 5' deletion (32 nt), 3' deletion (20 nt)        |

## 8. Atlantic canary (*Serinus canaria*)

| Exon | NCBI Accession  | Strand | Start | End   |                                             |
|------|-----------------|--------|-------|-------|---------------------------------------------|
| 1    | CAVT010026339.1 | -      | 3022  | 3305  | 1-nt deletion, 1 nonsense codon             |
| 2    | CAVT010007653.1 | +      | 13641 | 13785 | translocation, 1-nt deletion, 1-nt deletion |
| 3    | CAVT010026339.1 | -      | 1398  | 1495  | 5' deletion (64 nt), 1 nonsense codon       |
| 4    |                 |        |       |       | exon deletion                               |
| 5    |                 |        |       |       | exon deletion                               |
| 6    |                 |        |       |       | exon deletion                               |
| 7    |                 |        |       |       | exon deletion                               |
| 8    |                 |        |       |       | exon deletion                               |
| 9    |                 |        |       |       | exon deletion                               |
| 10   |                 |        |       |       | exon deletion                               |
| 11   |                 |        |       |       | exon deletion                               |

|    |                 |   |       |       |                                           |
|----|-----------------|---|-------|-------|-------------------------------------------|
| 12 |                 |   |       |       | exon deletion                             |
| 13 | CAVT010026338.1 | - | 11275 | 11356 | 5' deletion (105 nt), 3' deletion (35 nt) |

## 9. Medium ground finch (*Geospiza fortis*)

| Exon | NCBI Accession | Strand | Start | End   |                                                |
|------|----------------|--------|-------|-------|------------------------------------------------|
| 1    | AKZB01056505.1 | +      | 41098 | 41381 | 1-nt deletion, 1 nonsense codon                |
| 2    | AKZB01004402.1 | -      | 8834  | 8979  | translocation, 1 nonsense codon, 1-nt deletion |
| 3    | AKZB01056505.1 | +      | 42908 | 43005 | 5' deletion (64 nt), 1 nonsense codon          |
| 4    |                |        |       |       | exon deletion                                  |
| 5    |                |        |       |       | exon deletion                                  |
| 6    |                |        |       |       | exon deletion                                  |
| 7    |                |        |       |       | exon deletion                                  |
| 8    |                |        |       |       | exon deletion                                  |
| 9    |                |        |       |       | exon deletion                                  |
| 10   |                |        |       |       | exon deletion                                  |
| 11   |                |        |       |       | exon deletion                                  |
| 12   |                |        |       |       | exon deletion                                  |
| 13   | AKZB01056505.1 | +      | 44552 | 44668 | 5' deletion (105 nt)                           |

## 10. White-throated sparrow (*Zonotrichia albicollis*)

| Exon | NCBI Accession | Strand | Start  | End    |                                                 |
|------|----------------|--------|--------|--------|-------------------------------------------------|
| 1    | ARWJ01002597.1 | +      | 41176  | 41445  | 11-nt deletion, 1-nt deletion, 1 nonsense codon |
| 2    | ARWJ01002366.1 | -      | 303048 | 303193 | translocation, 1 nonsense codon, 1-nt deletion  |
| 3    | ARWJ01002597.1 | +      | 42965  | 43060  | 5' deletion (64 nt), 2-nt deletion              |
| 4    |                |        |        |        | exon deletion                                   |
| 5    |                |        |        |        | exon deletion                                   |
| 6    |                |        |        |        | exon deletion                                   |
| 7    |                |        |        |        | exon deletion                                   |
| 8    |                |        |        |        | exon deletion                                   |
| 9    |                |        |        |        | exon deletion                                   |
| 10   |                |        |        |        | exon deletion                                   |
| 11   |                |        |        |        | exon deletion                                   |
| 12   |                |        |        |        | exon deletion                                   |
| 13   | ARWJ01002597.1 | +      | 44680  | 44796  | 5' deletion (105 nt)                            |

## 11. Kea (*Nestor notabilis*)

| Exon | NCBI Accession | Strand | Start | End  |                                             |
|------|----------------|--------|-------|------|---------------------------------------------|
| 1    | JJRH01053300.1 | -      | 4293  | 4569 | 5-nt deletion, 5-nt deletion, 1-nt deletion |

|    |                |   |       |       |                                                    |
|----|----------------|---|-------|-------|----------------------------------------------------|
| 2  |                |   |       |       | exon deletion                                      |
| 3  | JJRH01053300.1 | - | 2058  | 2174  | 5' deletion (37 nt), 8-nt deletion                 |
| 4  | JJRH01053300.1 | - | 614   | 702   | splice acceptor AA, 4-nt insertion, 1-nt insertion |
| 5  |                |   |       |       | exon deletion                                      |
| 6  |                |   |       |       | exon deletion                                      |
| 7  |                |   |       |       | exon deletion                                      |
| 8  | JJRH01053299.1 | - | 23293 | 23384 |                                                    |
| 9  |                |   |       |       | exon deletion                                      |
| 10 |                |   |       |       | exon deletion                                      |
| 11 |                |   |       |       | exon deletion                                      |
| 12 |                |   |       |       | exon deletion                                      |
| 13 |                |   |       |       | exon deletion                                      |

## 12. Budgerigar (*Melopsittacus undulatus*)

| Exon | NCBI Accession | Strand | Start | End   |                                                   |
|------|----------------|--------|-------|-------|---------------------------------------------------|
| 1    | AGAI01057471.1 | -      | 11394 | 11673 | 5-nt deletion                                     |
| 2    |                |        |       |       | exon deletion                                     |
| 3    | AGAI01057471.1 | -      | 9187  | 9349  | splice acceptor GT, 1-nt insertion                |
| 4    | AGAI01057471.1 | -      | 7849  | 7926  | splice acceptor AT, 7-nt deletion, 1-nt insertion |
| 5    |                |        |       |       | exon deletion                                     |
| 6    |                |        |       |       | exon deletion                                     |
| 7    |                |        |       |       | exon deletion                                     |
| 8    | AGAI01057471.1 | -      | 6514  | 6605  | splice donor AT                                   |
| 9    |                |        |       |       | exon deletion                                     |
| 10   |                |        |       |       | exon deletion                                     |
| 11   |                |        |       |       | exon deletion                                     |
| 12   |                |        |       |       | exon deletion                                     |
| 13   |                |        |       |       | exon deletion                                     |

## 13. Puerto Rican Amazon (*Amazona vittata*)

| Exon | NCBI Accession | Strand | Start | End  |                                                   |
|------|----------------|--------|-------|------|---------------------------------------------------|
| 1    | AOCU01260777.1 | -      | 1784  | 2049 | 5-nt deletion, 2 nonsense codons, 14-nt deletion  |
| 2    |                |        |       |      | exon deletion                                     |
| 3    | AOCU01289053.1 | -      | 6271  | 6413 | 5' deletion (19 nt)                               |
| 4    | AOCU01289053.1 | -      | 4927  | 5004 | splice acceptor AT, 7-nt deletion, 1-nt insertion |
| 5    |                |        |       |      | exon deletion                                     |
| 6    |                |        |       |      | exon deletion                                     |
| 7    |                |        |       |      | exon deletion                                     |
| 8    | AOCU01289053.1 | -      | 3587  | 3678 |                                                   |

|    |  |  |  |  |               |
|----|--|--|--|--|---------------|
| 9  |  |  |  |  | exon deletion |
| 10 |  |  |  |  | exon deletion |
| 11 |  |  |  |  | exon deletion |
| 12 |  |  |  |  | exon deletion |
| 13 |  |  |  |  | exon deletion |

#### 14. Scarlet macaw (*Ara macao*)

| Exon | NCBI Accession | Strand | Start | End  |                                                   |
|------|----------------|--------|-------|------|---------------------------------------------------|
| 1    | AOUJ01293014.1 | -      | 2895  | 3168 | 5-nt deletion                                     |
| 2    |                |        |       |      | exon deletion                                     |
| 3    | AOUJ01073286.1 | -      | 5260  | 5422 | splice acceptor GT, 1-nt insertion                |
| 4    | AOUJ01073286.1 | -      | 3933  | 4010 | splice acceptor AT, 7-nt deletion, 1-nt insertion |
| 5    |                |        |       |      | exon deletion                                     |
| 6    |                |        |       |      | exon deletion                                     |
| 7    |                |        |       |      | exon deletion                                     |
| 8    | AOUJ01073286.1 | -      | 2613  | 2704 | 1 nonsense codon                                  |
| 9    |                |        |       |      | exon deletion                                     |
| 10   |                |        |       |      | exon deletion                                     |
| 11   |                |        |       |      | exon deletion                                     |
| 12   |                |        |       |      | exon deletion                                     |
| 13   |                |        |       |      | exon deletion                                     |

#### 15. Saker falcon (*Falco cherrug*)

| Exon | NCBI Accession | Strand | Start | End   |                                                  |
|------|----------------|--------|-------|-------|--------------------------------------------------|
| 1    | AKMU01022476.1 | +      | 4606  | 4885  | 5-nt deletion, 1 nonsense codon, splice donor GG |
| 2    | AKMU01022476.1 | +      | 7959  | 8105  | splice acceptor AA                               |
| 3    | AKMU01022476.1 | +      | 9661  | 9822  | splice donor GC                                  |
| 4    | AKMU01022476.1 | +      | 11065 | 11147 | 1-nt deletion                                    |
| 5    | AKMU01022476.1 | +      | 12346 | 12513 |                                                  |
| 6    | AKMU01022476.1 | +      | 13470 | 13575 |                                                  |
| 7    | AKMU01022476.1 | +      | 14426 | 14591 | 1 nonsense codon, 1-nt deletion                  |
| 8    | AKMU01022477.1 | +      | 641   | 732   |                                                  |
| 9    | AKMU01022477.1 | +      | 3900  | 3996  |                                                  |
| 10   | AKMU01022477.1 | +      | 4213  | 4272  | 1 nonsense codon                                 |
| 11   | AKMU01022477.1 | +      | 5292  | 5422  | splice acceptor TG                               |
| 12   | AKMU01022477.1 | +      | 5712  | 5826  |                                                  |
| 13   | AKMU01022477.1 | +      | 6579  | 6818  |                                                  |

#### 16. Peregrine falcon (*Falco peregrinus*)

| Exon | NCBI Accession | Strand | Start | End   |                                                  |
|------|----------------|--------|-------|-------|--------------------------------------------------|
| 1    | AKMT01062038.1 | -      | 2847  | 3126  | 5-nt deletion, 1 nonsense codon, splice donor GG |
| 2    | AKMT01062037.1 | -      | 7069  | 7215  | splice acceptor AA                               |
| 3    | AKMT01062037.1 | -      | 5352  | 5513  | splice donor GC                                  |
| 4    | AKMT01062037.1 | -      | 4029  | 4111  | 1-nt deletion                                    |
| 5    | AKMT01062037.1 | -      | 2659  | 2826  |                                                  |
| 6    | AKMT01062037.1 | -      | 1597  | 1702  |                                                  |
| 7    | AKMT01062037.1 | -      | 581   | 746   | 1 nonsense codon, 1-nt deletion                  |
| 8    | AKMT01062036.1 | -      | 160   | 251   |                                                  |
| 9    | AKMT01062035.1 | -      | 16968 | 17064 | 1 nonsense codon                                 |
| 10   | AKMT01062035.1 | -      | 16692 | 16751 | splice acceptor TG                               |
| 11   | AKMT01062035.1 | -      | 15542 | 15672 |                                                  |
| 12   | AKMT01062035.1 | -      | 15138 | 15252 |                                                  |
| 13   | AKMT01062035.1 | -      | 14146 | 14385 |                                                  |

### 17. Red-legged seriema (*Cariama cristata*)

| Exon | NCBI Accession | Strand | Start | End  |                                     |
|------|----------------|--------|-------|------|-------------------------------------|
| 1    | JJRQ01067943.1 | -      | 3196  | 3483 |                                     |
| 2    | JJRQ01089398.1 | -      | 6026  | 6172 |                                     |
| 3    | JJRQ01089398.1 | -      | 4295  | 4456 |                                     |
| 4    | JJRQ01089398.1 | -      | 3008  | 3091 |                                     |
| 5    | JJRQ01089398.1 | -      | 1668  | 1835 | 1 nonsense codon                    |
| 6    |                |        |       |      | exon deletion                       |
| 7    |                |        |       |      | exon deletion                       |
| 8    | JJRQ01089398.1 | -      | 157   | 248  |                                     |
| 9    | JJRQ01089397.1 | -      | 9251  | 9347 |                                     |
| 10   | JJRQ01089397.1 | -      | 8975  | 9034 | splice acceptor AC, splice donor CT |
| 11   | JJRQ01089397.1 | -      | 7870  | 8000 |                                     |
| 12   | JJRQ01089397.1 | -      | 7477  | 7591 |                                     |
| 13   | JJRQ01089397.1 | -      | 6778  | 7017 |                                     |

### 18. Downy woodpecker (*Picoides pubescens*)

gene deletion

### 19. Northern carmine bee-eater (*Merops nubicus*)

| Exon | NCBI Accession | Strand | Start | End  |                 |
|------|----------------|--------|-------|------|-----------------|
| 1    | JJRJ01070578.1 | -      | 7864  | 7967 | 181-nt deletion |
| 2    |                |        |       |      | exon deletion   |



|    |                |   |       |       |                                      |
|----|----------------|---|-------|-------|--------------------------------------|
| 3  | JJRJ01070578.1 | - | 5056  | 5217  |                                      |
| 4  |                |   |       |       | exon deletion                        |
| 5  |                |   |       |       | exon deletion                        |
| 6  |                |   |       |       | exon deletion                        |
| 7  |                |   |       |       | exon deletion                        |
| 8  |                |   |       |       | exon deletion                        |
| 9  | JJRJ01070578.1 | - | 1946  | 2035  | 7-nt deletion                        |
| 10 | JJRJ01070578.1 | - | 1669  | 1728  |                                      |
| 11 | JJRJ01070578.1 | - | 594   | 724   | 1 nonsense codon, splice donor TT    |
| 12 | JJRJ01070578.1 | - | 191   | 305   |                                      |
| 13 | JJRJ01102545.1 | - | 12533 | 12766 | splice acceptor AA, 1 nonsense codon |

## 20. Rhinoceros hornbill (*Buceros rhinoceros silvestris*)

| Exon | NCBI Accession | Strand | Start | End   |                                             |
|------|----------------|--------|-------|-------|---------------------------------------------|
| 1    | JMFK01029556.1 | +      | 2267  | 2539  |                                             |
| 2    | JMFK01029556.1 | +      | 5429  | 5575  |                                             |
| 3    | JMFK01029556.1 | +      | 7116  | 7277  |                                             |
| 4    | JMFK01029556.1 | +      | 8453  | 8536  |                                             |
| 5    | JMFK01029556.1 | +      | 9694  | 9861  |                                             |
| 6    | JMFK01029556.1 | +      | 10793 | 10895 |                                             |
| 7    | JMFK01029556.1 | +      | 11673 | 11838 | 1-nt deletion                               |
| 8    | JMFK01029557.1 | +      | 513   | 604   |                                             |
| 9    | JMFK01029557.1 | +      | 3195  | 3291  |                                             |
| 10   | JMFK01029557.1 | +      | 3509  | 3568  |                                             |
| 11   | JMFK01029557.1 | +      | 4586  | 4716  |                                             |
| 12   | JMFK01029558.1 | +      | <1    | 82    | 5' partial (33-nt; recovered from WGS data) |
| 13   | JMFK01029559.1 | +      | 857   | 1096  |                                             |

## 21. Bar-tailed trogon (*Apaloderma vittatum*)

| Exon | NCBI Accession | Strand | Start | End   |                                                      |
|------|----------------|--------|-------|-------|------------------------------------------------------|
| 1    | JMFV01079656.1 | -      | 34047 | 34331 |                                                      |
| 2    | JMFV01079656.1 | -      | 30744 | 30878 | splice acceptor AT, splice donor TT                  |
| 3    | JMFV01079656.1 | -      | 28613 | 28714 | 5' deletion (58 nt), 1 nonsense codon, 2-nt deletion |
| 4    | JMFV01079656.1 | -      | 27329 | 27412 |                                                      |
| 5    | JMFV01079656.1 | -      | 25990 | 26164 | 7-nt insertion                                       |
| 6    | JMFV01079656.1 | -      | 24948 | 25046 | 5' deletion (4 nt), 2 nonsense codons                |
| 7    | JMFV01079656.1 | -      | 24055 | 24211 | 10-nt deletion                                       |
| 8    | JMFV01079656.1 | -      | 22011 | 22102 |                                                      |
| 9    | JMFV01079656.1 | -      | 20694 | 20790 |                                                      |

|    |                |   |       |       |                                                       |
|----|----------------|---|-------|-------|-------------------------------------------------------|
| 10 | JMFV01079656.1 | - | 20411 | 20470 | splice acceptor GG                                    |
| 11 | JMFV01079656.1 | - | 19249 | 19379 |                                                       |
| 12 | JMFV01079656.1 | - | 18874 | 18988 |                                                       |
| 13 | JMFV01079656.1 | - | 17962 | 18181 | 1-nt insertion, 1 nonsense codon, 3' deletion (21 nt) |

## 22. Cuckoo roller (*Leptosomus discolor*)

| Exon | NCBI Accession | Strand | Start | End   |                                      |
|------|----------------|--------|-------|-------|--------------------------------------|
| 1    | JJRK01070547.1 | -      | 16649 | 16933 |                                      |
| 2    | JJRK01070547.1 | -      | 13491 | 13637 | splice acceptor GG, 1 nonsense codon |
| 3    | JJRK01070547.1 | -      | 12909 | 13061 |                                      |
| 4    | JJRK01070547.1 | -      | 11587 | 11669 | 1-nt deletion                        |
| 5    | JJRK01070547.1 | -      | 11038 | 11205 | splice donor AG                      |
| 6    | JJRK01070547.1 | -      | 10411 | 10513 | splice acceptor TG, 1 nonsense codon |
| 7    | JJRK01070547.1 | -      | 9447  | 9613  |                                      |
| 8    | JJRK01070547.1 | -      | 7696  | 7785  | 2-nt deletion, splice donor AT       |
| 9    | JJRK01070547.1 | -      | 3835  | 3925  |                                      |
| 10   | JJRK01070547.1 | -      | 3573  | 3632  | splice acceptor TG                   |
| 11   | JJRK01070547.1 | -      | 2432  | 2560  | 2-nt deletion                        |
| 12   | JJRK01070547.1 | -      | 2032  | 2146  |                                      |
| 13   | JJRK01070547.1 | -      | 1126  | 1289  | 76-nt deletion                       |

## 23. Speckled mousebird (*Colius striatus*)

| Exon | NCBI Accession | Strand | Start | End   |                                                     |
|------|----------------|--------|-------|-------|-----------------------------------------------------|
| 1    | JJRP01021333.1 | -      | 9248  | 9516  | 5' deletion (12 nt), 1-nt deletion, splice donor TC |
| 2    | JJRP01021333.1 | -      | 6158  | 6304  | splice donor GC                                     |
| 3    | JJRP01021333.1 | -      | 4520  | 4673  | 8-nt deletion                                       |
| 4    | JJRP01021333.1 | -      | 3242  | 3323  | splice acceptor AA, 1 nonsense codon, 2-nt deletion |
| 5    | JJRP01021333.1 | -      | 2869  | 3036  | splice acceptor GA, splice donor AT                 |
| 6    | JJRP01021333.1 | -      | 2046  | 2148  |                                                     |
| 7    | JJRP01021333.1 | -      | 1104  | 1270  | splice acceptor AT, 2 nonsense codons               |
| 8    | JJRP01021332.1 | -      | 9970  | 10061 |                                                     |
| 9    |                |        |       |       | exon deletion                                       |
| 10   |                |        |       |       | exon deletion                                       |
| 11   | JJRP01021332.1 | -      | 6727  | 6857  | 2 nonsense codons                                   |
| 12   | JJRP01021332.1 | -      | 6328  | 6442  | splice acceptor GG, splice donor CT                 |
| 13   | JJRP01021332.1 | -      | 5381  | 5620  |                                                     |

## 24. Barn owl (*Tyto alba*)

```
>Tyto_alba No=24 length=1854 name="Barn owl"
ATGATGGCAGTTCTCCTCTCAAGAATCAAGGGTATGCTCTTCTCTGTTTCTCCATTCTTTTGTCTG
GTCAGCCCCGCACCTCCACTGCTGCGTTTTCTCCATCTTCTGGATCCTTCAAACACGGTCTACCTCCGCTG
GGACCATGACGAACAGGAGCTGATGACGTTTGAGCTGCAGGTCCCTACAACGGGCTGGGTGGCATTGGA
TTCAGCCCTCGCGGAGAATTGCCTGGATCTGACATTGTGATAGGAGGTACCTTCCCAAATGGCAGTATCT
ACTTCTCTGATTGTACATGGTAGATGAGGCAACGCTTGAGGAAGATGAGAGCCAGGACTACCAACTGCT
GTCAGTGACAGAGAATGAGACCTCCACTACCATGCTGTTCAAACGCCACCTCCGGACGTGTGACCCAAAT
GACCTTGATATCACGACGGACACAGCACGCCTCATTGCTGCATTTGGCACTGATGACACAGTCCAATTCT
TTAAAGGCCAAAGATTTTCCAAATCTCTTTCTTGATGAGGTACAGAGGCCCATCTGACTTAAATGACCC
CAAATATTCTTACCTATGACCTGAGGCTGGACAATTTGCTGTTCCCATTTGAAGAAACCAAGTATGCC
TGTACATTTCTCCACTGCCCGTGGTCAAGCAGAAGCACCATATTTACAAGTTTGAACCATAATAACAC
CCCACAACATAACCTTGGTTTCATCATATTCTGTTTATGCTTGTGGCAACGTCAGCGTGTACCCCGTGG
CATAGATGATTGCTATGGAGCCAATCCAGATTTTGCCTTGTGCTCTCAGGTGCTGGTGGGCTGGGCTGTT
GGAGGAGAGTCTTATCAACTTCCAGATGAAGCTGCATTTTCCATAGGGACACCCTGGGACCCTTGGTACA
TCCGACTAGAAATCCATTACAGCAATTTGACTTATTACCAGGCTTGATTGACAGCTCAGGGGTACGAAT
CTACTATACTCCAGAGCTACGGAATTATGATGTGGGCGTTCTGCAAAACAGGCATCTTCACTTCCCTGTG
CATTTTCATTCTCCTGGAGCAGAATCCTACAGATCTTATGGCCTTTGCAATTCGAGCCAGTTTGATGAAA
TGAATGGGATGCTGGTTCCAGATCTGCATGTCTTTGCCTACTTGCTTACACCCACTTGTCTGGCAGAGG
AGTGAAGCTGCTCAATACCGGAACGGCGAGCAGCTAAGGATCATCTGTGAGGACAATAACTATGACTTC
AGACTGCAGGAGATACGGGACATGAAGGAAATCCTCATAATCAAACCAGGGGATGAGATCCTGGTCAAT
GCAACTTTCAGACACTGGATCGGTCAGGGGTTACTTTTGGTGGGCCAAGCACCATGAATGAGATGTGTCT
CACTTTCCTCTTCTATTACCCTCGTAACAACATCTCCAGTTGTATGGGCTACCCTGACATTTTGTACATT
GCGCATGTACTCAAGCAGGAGGCTCAGATGCAGTGGAAAGGAATGATGGCCATGGACTTCGTTGACTGGG
ACAACGATACTGTCAAAATTTGACAGAGAAAGCAGCCAAGGAGGCAAAATCAAGTAGTCATGATTA AAAACAT
TAATGAACTCCAAAGAAGTGAGAGTGGTCTAATCAGAGACATTAGTATTCAGAGCAGGCTGCCGCCAC
AATATTTCTGGACAACCTCTCACTGTGGGCTGAGGGCCACTGCAAACCTTCATTTGACCTCAGTGTGCA
CTTCTGAGTCATCAGCTACCACAGAAATTGCTTCACTTCTCTTATTTCTCTCACACATCTGGTGTGTTGC
TTGCCTTATTTTGGCCTCTGACTATGGGAAGTAA
```

```
>Tyto_alba No=24 length=617 name="Barn owl"
MMAVLLSRIKGMFLFLFLPFFCSGQPAPPLLRFSIFLDPSNTVYLRWDHDEQELMTFELQVPTTGWVAFG
FSPRGELPGSDIVIGGTFPNGSIYFSDCHMVDEATLEEDESQDYQLLSVTENETSTTMLFKRHLRTRCDPN
DLDITTDARLIAAFGTDDTVQFFKQRFKSLFLMRYRGPDLNDPKIFFTYDLRLDNFAVPIEETKYA
CTFLPLPVVKQKHIIYKFEPITPHNITLVHIIHLYACGNVSVLPRGIDDCYGANPDFALCSQVLVGVAV
GGESYQLPDEAAFSIGTPWDPWYIRLEIHYSNFDLLPGLIDSSGVRIYYTPELRNYDVGVLQGTGIFTFPV
HFIPPGAESYRSYGLCNSSQFDEMNGMLVPLDHFVAYLLHHLTHLSGRGVKAAQYRNQEQLRIRICEDNNYDF
RLQEIRDMEKILIIKPGDEILVECNFQTLDRSGVTFGGPSTMNEMCLTFLFYPRNNISSCMGYPDILYI
AHVLKQEAASDAVEGMMAMDFVDWDNDTVKIAEKAAKEANQVVMIKNINELQRSESLIRDISIPEQAACH
NISGQLSLSGLRATANLHLTSVCTSESSATTEIASLPLISLTHLVFACILILASDYGK
```

| Exon | NCBI Accession | Strand | Start | End   |
|------|----------------|--------|-------|-------|
| 1    | JJRD01156581.1 | -      | 19802 | 20089 |
| 2    | JJRD01156581.1 | -      | 16910 | 17056 |
| 3    | JJRD01156581.1 | -      | 15196 | 15357 |
| 4    | JJRD01156581.1 | -      | 13897 | 13980 |
| 5    | JJRD01156581.1 | -      | 12547 | 12714 |
| 6    | JJRD01156581.1 | -      | 11498 | 11600 |
| 7    | JJRD01156581.1 | -      | 10482 | 10648 |
| 8    | JJRD01156581.1 | -      | 8577  | 8668  |
| 9    | JJRD01156581.1 | -      | 4288  | 4384  |
| 10   | JJRD01156581.1 | -      | 4025  | 4084  |
| 11   | JJRD01156581.1 | -      | 2883  | 3013  |
| 12   | JJRD01156581.1 | -      | 2470  | 2584  |

## 25. Turkey vulture (*Cathartes aura*)

```
>Cathartes_aura No=25 length=1854 name="Turkey vulture"
ATGATGGCAGTTCTCTTCTCAAGAATCAAGGATATGCTCTTCTCTTGTTCCTCCCATGCTTTTGTCTG
GTCAGCCTGCATGTCCACTTCTGCGTTTCTCCATCTTCTGGATCCTTCAAACATGGTCTACCTCCGCTG
GGACCATGATGAACAGGAGCTGATGACATTTGAGCTGCAGGTCCATACAACCTGGCTGGGTGGCATTGGA
TTCAGCCCTCATGGAGAGTTGCCTGGATCTGACATTGTGATAGGAGGTGTCTTCCCAAATGGCAGCATCT
ACTTCTCTGATTGTGATGTGGTAGATGAGGCAACCTTGGAGGAAGATGAGAGCCAAGACTACCAACTGCT
GTCAGTGACAGAGAATGAGACCTCCACCACCATGCTGTTCAAACGCCACCTCCGGACATGTGACCCAAAT
GACCTGGATATCACAGTGGACACAGCACGCGTTCGTTACTGCATTTGGCACTGATGACACAGTCCAATTCT
TTAAAGGCCAAAGATTCTCCAAATCTCTCTTCTTGTATGAGGTACAGAGGCCCATGTGACTCCACTGACCC
CAAATATTTCTTTCAGCTATGACCTGAGGCTGGACAATTTTGTGTTCAGTTGAAGAAACCAAGTATGCC
TGTACCTTTTATCCACTGCCCATGGTCAAGCAGAAACATCATGTCTACAAGTTCGAACCTGTAATAACAC
CCCGCAACATAACCTTGATTTCATCATATTCTTATTTATGCCTGTGGCAACGCTAGTGTGTACCCAGTGG
CATAGATGATTGCTATGGAGCCAATTCAGATTTCTCCCTGTGCTCTCAAGTGCCTTTTGGCTGGGCTGTT
GGAGGAAAGTCTTATCAATTTCCAGATGAAGCTGCAGTTTCCATAGGGACACCTTGGGACCCCTCAGTACG
TCCGACTAGAAATCCATTACAGCAATTTTGACTTGTACCAGGCTTGTATCGACAGCTCAGGGGTACGAAT
CTACTATACTCCAGAACTACGAAATATGATGTGGGGGTTCTGCAAAACAGGCATCTTCATTTTCCCTATG
CATTTTCATTCTCTGAGCAGAATCCTACAGATCTTATGGCCTTTGCAATTCAGCCAGTTTGTATGAAA
TGAATGGGATGCTGGTTCCAGATCTGCATGTCTTTGCCTACTTGTCTCACACCCACCTGTCTGGCAGAGG
AGTGAAGCTGCTCAATACCGGAACGGTGCAGCAGCTGAGGATCATCTGTGAGGACAATAAGTATGACTTC
AGACTGCAGGAGATTCCGGACACGAAGGAAATCCTCATAATCAAACCAGGGGATGAGATCCTGGTCAAT
GCAACTTTTCAGACACTGGATCGGTCAGGGATTACTTTTGGTGGACCAAGCACCATGAATGAGATGTGTCT
CACGTTCTCTTCTACTACCCTCGTAACAACATCTCCAGTTGTATGGGCTACGCCGACATTTTGTACATT
GCGCACGTACTCAAGCAGGAGGCTCAGATGCAGTGGAAAGGAATGATGGCCATGGACTTTGTGACTGGG
ACAATGATACTATCAAAATTTGCAGAGAAAAGCAGCCAAGGAGGCAGATCAAGTAGTCATGATTAATACTAT
TAATGAACTCCAGAGAAATGAGAGTGGTCTAATCCGAGACATGAGTATTCAGAGCGGGCTGCCGTGCAC
AACATTTCTGGACACCTCTCACTGTACATCTGAGGGCCACTGCAAACCTTCGTTTGCACCGCAGTATGCA
CTTCTGAGTCATCAACCACCAAAGAACTGCTTCACTTCTCTTCTTTCTTTTACACAGCTGGTGTTC
TTGGCTTATCTTGGCCTCTGAGTATGGGAAGTGA
```

```
>Cathartes_aura No=25 length=617 name="Turkey vulture"
MMAVLFVSRKDMFLFLPCFCVSGPACPLLRFSIFLDPSNMVYLRWDHDEQELMTFELQVHTTGWVAFG
FSPHGELPGSDIVIGGVFPNGSIYFSDCHVVDEATLEEDESQDYQLLSVTENETSTTMLFKRHLRTPDN
DLDITVDTARVVTAFGTDDTVQFFKQRFKSLFLMRYRGPDCSTDPKIFFSYDLRLDNFAVPVEETKYA
CTFIPLPMVKQKHVYKFEFVITPRNITLIHHLIYACGNASVLPSPGIDDCYGANSDFSLCSQVLFGWAV
GGKSYQFPDEAAVSIPTPWPDPQYVRLEIHYNSFDLLPGLIDSSGVRIYYTPELRKYDVGVLTGTGIFIFPM
HFIPPGAESYRSYGLCNSSQFDEMNGMLVPLDHLVFAVLLHHLTHLSGRGVKAAQYRNQEQLRIRICEDNKYDF
RLQEIRDTEKELIKPGDEILVECNFQTLDRSGITFGGPSTMNEMCLTFLFYPRNNISSCMGYADILYI
AHVLKQEASDAVEGMMAMDFVDWDNDTIKIAEKAAKEADQVVMIKTINELQRNESGLIRDMSIPERAACH
NISGHLSLSHLRATANLRLTAVCTSESSTTKETASLPLLSFTQLVFPWLILASEYVK
```

| Exon | NCBI Accession | Strand | Start | End   |
|------|----------------|--------|-------|-------|
| 1    | JMFT01000581.1 | +      | 49174 | 49461 |
| 2    | JMFT01000581.1 | +      | 52508 | 52654 |
| 3    | JMFT01000581.1 | +      | 54229 | 54390 |
| 4    | JMFT01000581.1 | +      | 55611 | 55694 |
| 5    | JMFT01000581.1 | +      | 56857 | 57024 |
| 6    | JMFT01000581.1 | +      | 57966 | 58068 |
| 7    | JMFT01000581.1 | +      | 58858 | 59024 |
| 8    | JMFT01000581.1 | +      | 60842 | 60933 |

|    |                |   |       |      |                                            |
|----|----------------|---|-------|------|--------------------------------------------|
| 9  | JMFT01000582.1 | + | 3081  | 3177 |                                            |
| 10 | JMFT01000582.1 | + | 3394  | 3453 |                                            |
| 11 | JMFT01000582.1 | + | 4483  | 4613 |                                            |
| 12 | JMFT01000582.1 | + | <4895 | 5000 | 5' partial (9 nt; recovered from WGS data) |
| 13 | JMFT01000582.1 | + | 5757  | 5996 |                                            |

## 26. White-tailed eagle (*Haliaeetus albicilla*)

```
>Haliaeetus_albicilla No=26 length=1854 name="White-tailed eagle"
ATGATGGCAGTTCTCTTCTCAGGAATCAAGGGGATGCTCTTCTTCTGTTCCCTCATGCCTTTGTTCTT
GTCAGCCTGCACCTCCACTGCTGCGTTTCTCCATCTTCCCTGGATCCCTTCAAACATGGTCTACCTCCGCTG
GGACCATGACGAACAGGAGCTGATGACATTTGAGCTGCAGGTCCGTACAACCTGGCTGGGTGGCATTGGA
TTCAGCCCTCACGGAGAGTTGCCTGGATCTGACATTTGTGATAGGAGGTGTCTTCCCAAATGGCAGCATCT
ACTTCTCCGATTGTACATAGTAGATGAGGCAACCCCTTGAGGAAGATGGGAGCCAGGACTACCAACTGCT
GTCAATGACAGAGAATGAGACCTCCACCACCGTGCTGTCAAACGCCACCTAAGGACGTGTGACCCCAAT
GACCAGGATATCACGATGGACACAGCACGCCTCATTACTGCATTTGGCACTGATGACACAGTCCAATTCT
TTGAAGGCCAAAGATTTTCCAAATCTGTTTTCTTGTATGAGGTACAGAGGCCATCTGACTTAACTGACCC
CAAAATATTCTTCCACTATGACCTGAGGCTGGACAATTTTGTCTGCCAGTTGAAGAAACCATGTATGCC
TGTACCTTTATCCCCTGCCCATGGTCAAGCAGAAACACCATATCTACAAGTTCGAACCTGTAATAACAC
CCCACAACATAACCTTGGTTCATCATATTTCTTGTATGCTGTGGCAACGCCAGCGTGTACCCAGTGG
CATAGACGATTGCTATGGAGCCAATCCAGATTTTGCCTGTGCTCTCAGGTGCTTGTGGGGCTGGGCTGTC
GGAGGGGAGTCTTATCAATTTCCAGATGAAGCTGCGGTTTCCATAGGGACACCTTGGGACCCCTCAGTACG
TCCGACTAGAAATCCATTACAGCAATTTTACTTGTACCAGGCTTGTATCGACAGCTCAGGGGTACGAAT
CTACTATCTCCCGAGCTACGGCAGTATGATGTGGGGTCTGCAAACAGGCGTCTTCAATTTCCCTGTG
CATTTTCAATCTCCCGGGGAGCAATCCTACAGATCTTATGGCCTTTCGAATTCAGCCAGTTTGTATGAAA
TGAATGGGATGTTGGTTCAGATTTGCATGATTTTCCCTACTTGTCTCACACCCACCTGTCTGGCAGAGG
AGTGAAAGCTGCTCAATACCGGAATGGTGTGAGCAGCTGAGGATCATCTGTGAGGACAATAAGTACGACTTC
AGACTGCAGGAGATTCCGGACATGAAAGAAATCCTCATAATCAAACCAGGCGATGAGATCCTGGTCAAT
GCAATTTTTCAGACGCTGGATCGATCAGGGATTACTTTTGGTGGGCAAGCACCATGGATGAGATGTGTCT
GACATTCCTCTTCTACTACCCTCGTAACAACATCTCCAGTTGTATGGGCTTCCCTGACATACTGTACGTT
GCTCATGCACTCAAACAGGAGGCTTCCAGATGCAGTGAAGGAATGATGGCCATGGAGTTTGTGACTGGG
ACAATGATACTGTCAAATTTGCAGAGAAGGCAGCCAAGGAGGCAGATCAAGTAGTCATGATTAACCAT
TGATGAACTCCAGAGAAATGAGAGTGGTCTAATCAGAGACATTAGTATGCCAGAGCGGGCTGCCTGTCAC
AATATTTCTGGACACCTCTCACTGTCAGGTCGGAGGGCCACTGCAAACCTCCGTTTGACCGCAGTATGCA
CTTCTGAGTCACCAACCACCAAAGAACTGCTATACTTCTCTTCTTCTCTCACACAGCTGGTGTTTTC
TTGGCTGATCTTGGCCTCCGAGTATGGGAAATGA
```

```
>Haliaeetus_albicilla No=26 length=617 name="White-tailed eagle"
MMAVLFSGIKGMLFFLFLSCFCSCQPAPLLRFSIFLDPSNMVYLRWDHDEQELMTFELQVRRITGWVAFG
FSPHGEPLPGSDIVIGGVFPNGSIYFSDCHIVDEATLEEDGSQDYQLLSMTENETSTTVLFKRHLRCDPN
DQDITMDTARLITAFGTDDTVQFFEGQRFKSVFLMRYRGPDLTDPKIFFTYDLRLDNFAVPVEETMYA
CTFIPPLPMVKQKHIIYKFEPIVITPHNITLVHHILVYACGNASVLPSPGIDDCYGANPDFALCSQVLVGVAV
GGESYQFPDEAAVSIPTPWPDPQYVRLEIHYSNFDLLPGLIDSSGVRIYYTPELRQYDVGVLTQVVFIFPV
HFIPPGAESYRSYGLCNSSQFDEMNGMLVLPDLHVFAYLLHHLTHLSGRGVKAAQYRNGEQLRIICEDNKYDF
RLQEIRDMKEILIKPGDEILVECNFQTLDRSGITFGGPSTMDMCLTFLEFYPRNNISSCMGFDPDILYV
AHALKQEASDAVEGMMAMEFVDWDNDTVKIAEKAAKEADQVVMIKTIDELQRNESGLIRDISMPERAACH
NISGHLSSLGRRATANLRLTAVCTSESPTTKETA I L P L L S L T Q L V F S W L I L A S E Y G K
```

| Exon | NCBI Accession | Strand | Start | End   |
|------|----------------|--------|-------|-------|
| 1    | JPRR01021096.1 | +      | 26194 | 26481 |
| 2    | JPRR01021096.1 | +      | 29471 | 29617 |
| 3    | JPRR01021096.1 | +      | 31199 | 31360 |
| 4    | JPRR01021096.1 | +      | 32581 | 32664 |

|    |                |   |       |       |
|----|----------------|---|-------|-------|
| 5  | JPRR01021096.1 | + | 34999 | 35166 |
| 6  | JPRR01021096.1 | + | 36110 | 36212 |
| 7  | JPRR01021096.1 | + | 37000 | 37166 |
| 8  | JPRR01021096.1 | + | 38969 | 39060 |
| 9  | JPRR01021096.1 | + | 41183 | 41279 |
| 10 | JPRR01021096.1 | + | 41496 | 41555 |
| 11 | JPRR01021096.1 | + | 42570 | 42700 |
| 12 | JPRR01021096.1 | + | 42991 | 43105 |
| 13 | JPRR01021096.1 | + | 43860 | 44099 |

## 27. Golden eagle (*Aquila chrysaetos canadensis*)

```
>Aquila_chrysaetos_canadensis No=27 length=1851 name="Golden eagle"
ATGGCAGTTCTCTTCTCAGGAATCAAGGGTATGCTCTTCTTCTTGTCCCTCCCATGCTTTTGTTCCTTGTGTC
AGCCTGCACCTCCACTGCTGCGTTTCTCCATCTTCTTGGATCCTTCAAACATGGTCTACCTCCGCTGGGA
CCATGACGAACAGGAGCTGATGACATTTGAGCTGCAGGTCCATACAACCTGGCTGGGTGGCATTGTTGGATTC
AGCCCTCACGGAGAGTTGCCTGGATCTGACATTTGTGATAGGAGGTGTCTCCCCAAATGGCAGCATCTACT
TCTCCGATTGTACAGTGGTAGATGAGGCAACCCTTGAGGAAGATGGGAGCCAGGACTACCAACTGCTGTC
AGTGACAGAGAATGAGACCTCCACCACCGTGTCTTCAAACGCCACCTAAGGACATGTGACCCCAATGAC
CAGGATATCACAATGGACACAGCACGCCTCATAACTGCATTTGGCACTGATGACACAGTCCAATTCTTTG
AAGGCCAAAGATTTTCCAAATCCCTTTTCTTGTGATGAGGTACAGAGGCCCATCTGACTTAACTGACCCCAA
AATATTCTTACCTATGACCTGAGGCTGGACAATTTGCTGTTCAGTTGAAGAAACCACGTATGCCGTGT
ACCTTTATCCCACTGCCCGTGGTCAAGCAGAAACACCATATCTACAAGTTCGAACCTGTAGTAACACCCC
ACAACATAACCTTGGTTCATCATATTCTTGTATGCTGCGGCAACGCCAGCGTGTACCCGGTGGCAT
AGATGATTGCTATGGAGCCAATCCAGATTTTGCCTGTGCTCTCAGGTGCTTGTGGGCTGGGCTGTTGGA
GGGGAGTCTTATCAATTTCCAGATGAAGCTGCCGTTTCCATAGGGACACCTTGGGACCTCAGTACGTCC
GACTAGAAATCCATTACAGCAATTTTGAAGTGTACCAGGCTTGATCGACAGCTCAGGGGTACGAATCTA
CTATACTCCGGAGCTACGGAAGTATGACGTGGGGGTCTGCAAAACAGGCATCTTCACTTTCCCTGTGCAT
TTCATTCTCCTGGGGCAGAATCCTACAGATCTTATGGCCTTTGCAATTCAGCCGGTTTGTGAAATGA
ATGGGATGTTGGTTCAGATTTGCATGTATTTGCCTACTTGTCTCACACCCACCTGTCTGGCAGAGGAGT
GAAAGCTGCTCAATACCGGAATGGTGAGCAGCTGAGGATCATCTGTGAGGACAATCAGTACGACTTCAGA
CTGCAGGAGATTCGGGACATGAAAGAAATCCTCATAATCAAACAGGGGATGAGATCCTGGTTCGAATGCA
ATTTTCAGACGCTGGATCGATCAGGGATTACTTTTGGTGGGCCAAGCACCATGGATGAGATGTGTCTGAC
ATTCCTCTTCTACTACCCTCGTAACAACATCTCCAGTTGTATGGGCTTCCCTGACATACTGTACATTGCG
CATGCACTCAAACAGGAGCTTCAGATGCAGTGGAGAAGGATGATGGCCATGGAGTTTGTGACTGGGACA
ATGATACTGTCAAATTCAGAGAAGGCAGCCAAGGAGCAGATCAAGTAGTCATGATTAACCAATGTA
CGAACTCCAGAGAAATGAGAGTGGTTAATCAGAGACATTAGTATTCCAGAGCGGCCCTGCCGTGTCACAAT
ATTTCTGGACACCTCTCACTGTGAGGCTGAGGGCCACTGCAAACTCCGTTTGGACCGCAGTATGCACTT
CTGAGTACCAACCACCAAGAAACTGCTATACGTCCTCTTCTTCTCTCACACAGCTGGTGTTTTCTTG
GTTGATCTTGGCCTCCGAGTATGGGAAGTGA
```

```
>Aquila_chrysaetos_canadensis No=27 length=616 name="Golden eagle"
MAVLFSGIKGLFFLSLPCFCSCQPAPPLLRFSIFLDPSNMVYLRWDHDEQELMTFELQVHTTGWVAFGF
SPHGELPGSDIVIGGVSPNGSIYFSDCHVVDEATLEEDGSQDYQLLSVTENETSTTVLFRHLRTRCDPND
QDITMDTARLITAFGTDVQFFEGQRFSKSLFLMRYRGPDLTDPKIFFTYDLRLDNFAVPVEETTYAC
TFIPLPVVKQKHIIYKFEVVTPHNITLVHHILVYACGNASVLPGGIDDCYGANPDFALCSQVLVWVAVG
GESYQFPDEAAVSIPTWDPQYVRLIHYNSNFDLLPGLIDSSGVRIYYTPELRKYDVGVLQGTGIFTFVH
FIPPGAESYRSYGLCNSSRFDEMNGMLVDPDLHVFAYLLHTHLSGRGVKAAQYRNGEQLRIICEDNQYDFR
LQEIRDMKEILIIKPGDEILVECNFQTLDRSGITFFGGPSTMDMCLTFLFYPRNNISSCMGFDPDILYIA
HALKQEASDAVEGMMAMEFVDWDNDTVKIAEKAKEADQVVMIKTIDELQRNESGLIRDISIPERPACHN
ISGHLSSLGLRATANLRLTAVCTSESPTTKETAIRPLLSLTQLVFSWLILASEYGK
```

| Exon | NCBI Accession | Strand | Start | End |
|------|----------------|--------|-------|-----|
|------|----------------|--------|-------|-----|

|    |                |   |       |       |
|----|----------------|---|-------|-------|
| 1  | JDSB01102625.1 | - | 11004 | 11288 |
| 2  | JDSB01102625.1 | - | 8087  | 8233  |
| 3  | JDSB01102625.1 | - | 6347  | 6508  |
| 4  | JDSB01102625.1 | - | 5036  | 5119  |
| 5  | JDSB01102625.1 | - | 3658  | 3825  |
| 6  | JDSB01102625.1 | - | 2615  | 2717  |
| 7  | JDSB01102625.1 | - | 1653  | 1819  |
| 8  | JDSB01102624.1 | - | 2908  | 2999  |
| 9  | JDSB01102623.1 | - | 4253  | 4349  |
| 10 | JDSB01102623.1 | - | 3976  | 4035  |
| 11 | JDSB01102623.1 | - | 2834  | 2964  |
| 12 | JDSB01102623.1 | - | 2430  | 2544  |
| 13 | JDSB01102623.1 | - | 1435  | 1674  |

## 28. White-tailed tropicbird (*Phaethon lepturus*)

```
>Phaethon_lepturus No=28 length=1854 name="White-tailed tropicbird"
ATGATGGCAGTTCTCTTCACAAGAATCAAGGGTATGCCCTTCCTCTTGTTCCTCCCATGCTTTTGTCTG
GTCATCCTGCAGCTCCACTGCTGCGTTTCTCCATCTTTCTGGAGCCTTCAAACATGGTCTACCTCCGCTG
GGACCATGACGAACAGGAGATGATAACATTTGAGCTGCAGGTCCATACAACCTGGCTGGGTGGCATTGGA
TTCAGCCCTCATGGAGAGTTGCCTGGATCTGATATTGTGATAGGAGGTGTCTTCCCGAATGGCAGCATCT
ACTTCTCTGACTGTCATGTGGTTCGATGAGGCAACCCTGGAGGAAGATGAGAGCCAGGACTACCAACTGCT
GTCAGTAACAGAGAATGAGACCTCCACCACCATGATGTTCAAACGCCACCTCCGGACATGTGACCCAAAT
GACCTGGATATCACAGTGGATACAGCACGCCTTGTACTTTCATTTGGCACTGATGACACAGTCCAATTCT
TTAAAGGCCAAAGATTTTCCAAATCTCTTTCTTGATGAGGTCCAGAGGCCATCTGACTCAACTGGCCC
CAAACATTTCTTCCACCTATGACCTGAGGCTGGACAATTTTGTGTTCAGCTGAAGAAACCAAGTATGCC
TGTAATTTTATGCCACTGCCATGGTCAAGCAGAAACCATATCTACAAGTTTCAAGTTCGAACTGTAATAAC
CCCACAACATAACCTTGGTTCATCATATTCTTGTATTGCTTGTGGCAACGCCAGCGTGTACCAGTGG
CATAGACGATTGCTATGGAGCCAATCCAGATTTTGCCTGTGCTCACAGGTGCTTGTGGGCTGGGCTGTT
GGAGGAGAGTCTTACCAATTTCCAGATGAAGCTGCCATTTCCATAGGCACACCTCGGGACCCAGAGTACA
TCCGACTAGAAATCCATTACAGCAATTTGACTTGTACCAGGCCTGATTGACAGCTCAGGGGTACGAAT
CTATTATACGCCAGAGCTACGGAATATGATGTGGGAGTTCTGCAAAACAGGCATCTTCACTTTCCCTGTG
CATTTTCATTCCCTCCTGGAGCAGAATCCTACAGATCCTACGGTCTTTGCAATTCAGCCAGTTTGTGAAA
TGAATGGGATGCTGGTTCCAGATCTGCATGTCTTTGCCTACTTGCTTCACACCCACTTATCTGGCAGAGG
AGTGAGAGCTGCTCAATACAGGAATGGTGAAGGAAATCCTCATAATCAAACCAGGGGACGAGATCCTGGTTGAAT
GCAACTTTTCAGACACTGGATCGGTGAGAGATTACTTTTGGTGGGCCAGGCACCATGAATGAAATGTGTCT
CACATTCCTCTTCTACTATCCTCGTAACAACATGTCCAGTTGTATGGGCTACCTGACATTTTGTACATT
GCACATGTACTCAAGCAGAAGGCCTCAGATGCACTGGAAGGAATGATGGCCATGGGCTTTGTTGACTGGG
ACAATGAGACTGTCAAAATTTGAGAGAAAGCAGCCAAGGAGGCAGATCAAGTAGTCATGATTAACCAT
TAATGAACTCCAGAGAAATGAGACTGGTCTAATCAGAGACATTAGTATTCAGAGCGGGCTGCCGTGCAC
AATATTTCTGGACACCTCTCACTGTCAGGTCTGAGGGCCACTGCAAACCTTCGTCTGACCGCAGTATGCA
CTTCTGAGTCATCAACCACCAAAGAAACTGCTTCACTTCTCTTCTCTCACACAGCTGGTGTGTTG
TTGGCTTATCTTGGCCTCTGAGTATGGGAAGTGA
```

```
>Phaethon_lepturus No=28 length=617 name="White-tailed tropicbird"
MMAVLFTRIKGMPFLLFLPCFCSGHPAAPLLRFSIFLEPSNMVYLRWDHDEQEMITFELQVHTTGWVAFG
FSPHGELPGSDIVIGGVFPNGSIYFSDCHVVDEATLEEDESQDYQLLSVTENETSTTMMFKRHLRTRCDPN
DLDITVDTARLVTSFGTDDTVQFFKQRFKSLFLMRSRGPSTSTGPKTFFTYDLRLDNFAVPAEETKYA
CTFMPLPMVKQKHIIYKFEPVITPHNITLVHIIHLYACGNASVLPSTGIDDCYGANPDFALCSQVLVGVAV
GGESYQFPDEAAISIGTPRDPEYIRLEIHYSNFDLLPLGLIDSSGVRIYYTPELRKYDVGVLQGTGIFTFPV
HFIPPGAESYRSYGLCNSSQFDEMNGMLVPLDHLVFAVYLLHHLHLSGRGVRAAQYRNGEPLGIICEDNKYDF
```

RLQEIRDMKEILIIKPGDEILVECNFQTLDRSEITFGGPGTMNEMCLTFLFYPRNNMSSCMGYPDILYI  
 AHVLKQKASDALEGMAMGFVDWDNETVKIAEKAAKEADQVVMIKTINELQRNETGLIRDISI PERAACH  
 NISGHLSSLRATANLRLTAVCTSESSTTKETASLPLLSLTQLVFAWLILASEYGK

| Exon | NCBI Accession | Strand | Start | End   |
|------|----------------|--------|-------|-------|
| 1    | JJRF01073064.1 | +      | 2912  | 3199  |
| 2    | JJRF01073064.1 | +      | 6164  | 6310  |
| 3    | JJRF01073064.1 | +      | 8384  | 8545  |
| 4    | JJRF01073064.1 | +      | 9753  | 9836  |
| 5    | JJRF01073064.1 | +      | 11029 | 11196 |
| 6    | JJRF01073064.1 | +      | 12608 | 12710 |
| 7    | JJRF01073064.1 | +      | 13374 | 13540 |
| 8    | JJRF01073064.1 | +      | 15359 | 15450 |
| 9    | JJRF01073065.1 | +      | 1476  | 1572  |
| 10   | JJRF01073066.1 | +      | 191   | 250   |
| 11   | JJRF01073066.1 | +      | 1255  | 1385  |
| 12   | JJRF01073066.1 | +      | 1671  | 1785  |
| 13   | JJRF01073066.1 | +      | 2537  | 2776  |

## 29. Sunbittern (*Eurypyga helias*)

| Exon | NCBI Accession | Strand | Start | End  |                                       |
|------|----------------|--------|-------|------|---------------------------------------|
| 1    |                |        |       |      | exon deletion                         |
| 2    |                |        |       |      | exon deletion                         |
| 3    | JJRO01041941.1 | +      | 3849  | 4003 | 1 nonsense codon, 7-nt deletion       |
| 4    | JJRO01041941.1 | +      | 5215  | 5299 | 1-nt insertion                        |
| 5    | JJRO01041941.1 | +      | 6479  | 6647 | splice acceptor AT, 1-nt insertion    |
| 6    | JJRO01041941.1 | +      | 7576  | 7678 | splice acceptor TT, 2 nonsense codons |
| 7    | JJRO01041941.1 | +      | 8312  | 8475 |                                       |
| 8    |                |        |       |      | exon deletion                         |
| 9    |                |        |       |      | exon deletion                         |
| 10   |                |        |       |      | exon deletion                         |
| 11   |                |        |       |      | exon deletion                         |
| 12   |                |        |       |      | exon deletion                         |
| 13   |                |        |       |      | exon deletion                         |

## 30. Red-throated loon (*Gavia stellata*)

>Gavia\_stellata No=30 length=1854 name="Red-throated loon"  
 ATGATGGCAGTGCTCTTCTCAAGAATCAAGGGTATGCTCTTCCTCTTGTTCCTCCCATGCTTTTGTTCCTG  
 GTCAGCCTGCACCTCCGCTGCTGCGTTTCTCCATCTTCCTGGATCCTTCAAACACGGTCTACCTCCGCTG  
 GGACCATGACGAACAGGAGCTGATGACGTTTGTGAGCTGCAGGTCCTTACAACCTGGCTGGGTGGCATTGGA  
 TTCAGCCCTCACGGAGAGTTGCCTGGATCTGACATTGTGATAGGAGGTGCTTCCCAAATGGCAGCATCT



ACTTCTCCGATTGTCATGTGGTAGATGAGGCAACCCTTGAGGAAGATGAGAGCCAGGACTACCAACTGCT  
 GTCAGTAACAGAGAATGAGACCTCCACCACCATGCTGTTCAAACGCCATCTCCGGACATGTGACCCAAAT  
 GACCTGGATATCACAATGGACACAGCACGCCTCGTTACTGCATTTGGCATGGATGACACAGTCCAATTCT  
 TTAAAGGCCAAAGATTTTCCAAATCTCTTTTCTTGATGAGGTACAGAGGCCATCTGACTCAACTGACCC  
 CAAAATATTCTTACCTATGACCTGAGGCTGGACAATTTTGCCGTTCCAGCTCAAGAGACCAAGTATGCC  
 TGTACCTTTATCCCCTGCCCATGGTCAAGCAGAAAACCCATATTTACAAGTTCGAACCTGTAATAACAC  
 CCCACAAAATAACCTTGATTTCATCATATTTGTTTACGCCTGTGGCAACGCCAGCCCGTTACCCAGTGG  
 CATAGATGATTGCTATGGGGCCAATCCAGATTTTGCCCTGTGCTCTCAGGTGCTTGTGGGGCTGGGGTGT  
 GGAGGAGAGTCTTACCAATTTCCAGATGAAGCTGCAGTTTCCATAGGGACACCTTGGGACCCCTCAGTACG  
 TCCGACTAGAAATCCATTACAGCAATTTTACTTGTACCAGGCTTGATAGACAGTTCAGGGCTACGAAT  
 CTACTATACGCCGGAGCTACGGAAATATGATGTGGGGTCTGCAAACAGGCATCTTCACTTTCCCTGTG  
 CATTTTCATTCCTCTGGAGCAGAATCCTACAGATCCTACGGCCTTTGCAATTCAGCCAGTTTGATGAAA  
 TGAATGGGATGCTGGTTCCAGATCTGCATGCTTGCCTACTTGCCTTACACCCACCTGTCTGGCAGAG  
 AGTGAAAGCTGCTCAATACCGCAATGGTGAGCAGCTGGGGATCATCTGTGAGGACAATAAGTACGACTTC  
 AGACTGCAGGAGATTCCGGACATGAAGGAAAACCTCATAATCAAACCAGGTGATGAGATCCTGGTCAAT  
 GCAACTTTTACAGACTGGATCGGTGAGGATTACTTTTGGTGGGCCAAGCACCATGAATGAGATGTGTCT  
 CACATTCCTCTTCTACTACCCTCGTAACAACATCTCCAGTTGTATGGGCTACCCTGACATTTTGTATGTT  
 GCGCATGTACTCAAGCAGGAGGCCCTCAGATGTGGTGAAGGAATGATGGCCATGGACTTTGTTGACTGGG  
 ACAATGAGACTGTCAAAATTGCAGAAAAAGCAGCCAAGGAGGCAGATCAAGTAATCATGATTAACCAT  
 TAATGAACTCCAGAGAAATGAGAGTGGTCTCATCAGAGACATCAGTATTCAGAGCGGGCTGCCTGTCAC  
 AATATTTCTGGATACCTCTCGCTGTCAGGCCTGAAGGCCACTGCAAACCTTCGTTTGACCGCAGTATGCA  
 CTTCTGAGTCACCAGCCACCAAAGAAACCGCTTACATCCTCTTCTCTCTGACACAGCTGGTGTGTTGC  
 TTGGCTTATCTTGTCTCTGAGCATGGGAAATGA

>Gavia\_stellata No=30 length=617 name="Red-throated loon"  
 MMAVLFSRIKGLFLLFLPCFCSGQPAPPLLRFSIFLDPSNTVYLRWDHDEQELMTFELQVPTTGWVAFG  
 FSPHGE L P G S D I V I G G V F P N G S I Y F S D C H V V D E A T L E E D E S Q D Y Q L L S V T E N E T S T M L F K R H L R T C D P N  
 D L D I T M D T A R L V T A F G M D D T V Q F F K G Q R F S K S L F L M R Y R G P S D S T D P K I F F T Y D L R L D N F A V P A Q E T K Y A  
 C T F I P L P M V K Q K H H I Y K F E P V I T P H K I T L I H H I L V Y A C G N A S P L P S G I D D C Y G A N P D F A L C S Q V L V G W A V  
 G G E S Y Q F P D E A A V S I G T P W D P Q Y V R L E I H Y S N F D L L P G L I D S S G L R I Y Y T P E L R K Y D V G V L Q T G I F T F P V  
 H F I P P G A E S Y R S Y G L C N S S Q F D E M N G M L V P D L H V F A Y L L H T H L S G R G V K A A Q Y R N G E Q L G I I C E D N K Y D F  
 R L Q E I R D M K E N L I I K P G D E I L V E C N F Q T L D R S G I T F G G P S T M N E M C L T F L F Y Y P R N N I S S C M G Y P D I L Y V  
 A H V L K Q E A S D V V E G M M A M D F V D W D N E T V K I A E K A A K E A D Q V I M I K T I N E L Q R N E S G L I R D I S I P E R A A C H  
 N I S G Y L S L S G L K A T A N L R L T A V C T S E S P A T K E T A S H P L L S L T Q L V F A W L I L S S E H G K

| Exon | NCBI Accession | Strand | Start | End   |
|------|----------------|--------|-------|-------|
| 1    | JJRM01006527.1 | +      | 21615 | 21902 |
| 2    | JJRM01006527.1 | +      | 25043 | 25189 |
| 3    | JJRM01006527.1 | +      | 26766 | 26927 |
| 4    | JJRM01006527.1 | +      | 28266 | 28349 |
| 5    | JJRM01006527.1 | +      | 29496 | 29663 |
| 6    | JJRM01006527.1 | +      | 30603 | 30705 |
| 7    | JJRM01006527.1 | +      | 31385 | 31551 |
| 8    | JJRM01006527.1 | +      | 33436 | 33527 |
| 9    | JJRM01006527.1 | +      | 36869 | 36965 |
| 10   | JJRM01006527.1 | +      | 37182 | 37241 |
| 11   | JJRM01006527.1 | +      | 38594 | 38724 |
| 12   | JJRM01006527.1 | +      | 39015 | 39129 |
| 13   | JJRM01006527.1 | +      | 39888 | 40127 |

---

### 31. Emperor penguin (*Aptenodytes forsteri*)

| Exon | NCBI Accession | Strand | Start | End   |                    |
|------|----------------|--------|-------|-------|--------------------|
| 1    | JMFQ01072246.1 | +      | 7243  | 7530  |                    |
| 2    | JMFQ01072246.1 | +      | 10558 | 10704 |                    |
| 3    | JMFQ01072246.1 | +      | 12266 | 12427 | splice acceptor AT |
| 4    | JMFQ01072246.1 | +      | 13645 | 13728 |                    |
| 5    | JMFQ01072246.1 | +      | 14914 | 15081 |                    |
| 6    | JMFQ01072246.1 | +      | 16031 | 16133 |                    |
| 7    | JMFQ01072246.1 | +      | 16929 | 17095 |                    |
| 8    | JMFQ01072246.1 | +      | 18865 | 18963 | 7-nt insertion     |
| 9    | JMFQ01072246.1 | +      | 22335 | 22431 |                    |
| 10   | JMFQ01072246.1 | +      | 22648 | 22707 | splice donor GA    |
| 11   |                |        |       |       | exon deletion      |
| 12   |                |        |       |       | exon deletion      |
| 13   | JMFQ01072246.1 | +      | 24182 | 24424 |                    |

### 32. Adelie Penguin (*Pygoscelis adeliae*)

| Exon | NCBI Accession | Strand | Start | End  |                  |
|------|----------------|--------|-------|------|------------------|
| 1    | JMFP01065789.1 | -      | 914   | 1201 | 1 nonsense codon |
| 2    | JMFP01065788.1 | -      | 7639  | 7785 |                  |
| 3    | JMFP01065788.1 | -      | 5913  | 6074 |                  |
| 4    | JMFP01065788.1 | -      | 4617  | 4700 |                  |
| 5    | JMFP01065788.1 | -      | 3113  | 3280 |                  |
| 6    | JMFP01065788.1 | -      | 2071  | 2173 |                  |
| 7    | JMFP01065788.1 | -      | 1125  | 1291 |                  |
| 8    | JMFP01065787.1 | -      | 823   | 916  | 2-nt insertion   |
| 9    | JMFP01065786.1 | -      | 4183  | 4279 |                  |
| 10   | JMFP01065786.1 | -      | 3907  | 3966 |                  |
| 11   | JMFP01065786.1 | -      | 2761  | 2891 |                  |
| 12   | JMFP01065786.1 | -      | 2362  | 2476 |                  |
| 13   | JMFP01065786.1 | -      | 1356  | 1598 |                  |

### 33. Northern fulmar (*Fulmarus glacialis*)

```
>Fulmarus_glacialis No=33 length=1809 name="Northern fulmar"
ATGATGGCAGTTCTCTTATCAAGAATCAAGGGTATGCTCTTCCCTCTTGTTCCTCCCATGCTTTTGTTCCTG
GTCAGCCTGCACCTCCACCTCTGCGTTTCTCCATCTTCCCTGGATCCTTCAAAGATGGTCTACCTCCGCTG
GGACCATGACGAACAGGAGCTGATGACGTTTGGAGCTGCAGGTCCATACAACCTGGCTGGGTGGCATTGGA
TTCAGCTCTCATGGAGAGTTGCCTGGATCTGACATTGTGATAGGAGGTGTCTTCCCAAATGGCAGCATCT
ACTTCTCTGATTGTCATGTGGTAGATGAGGCAACCATTTGAGGAAGACGAGAGCCAGGACTACCAACTGCT
GTCAGTGACAGAGAATGAGACCTCCACCACCATGCTGTTCAAACGCCACCTCCGGACATGTGACCCAAAC
GACCTGGATATCACAGTAGACACAGCACGCCTCGTTGCTGCCTTTGGTACTGATGACACAGTCCCATTCT
TTAAAGGCCAAATATTTTCCAAGTCCCTTTTCTTGTGAGGTTTCAGAAGCCCATCAACTGACCCTAAAAT
```

ATTCTTCACCTATGACCTGAGGCTGGACAATTTTGTGTTCCAGTTGAAGAAAACCAAGTATGCCTGTAAA  
 TTTATCCCCTGCCCATGGTCAAGCAGAAACACCATATCTACAAGTTCGATCCAGTAATAACACCCCACA  
 ACATAACCTTGGTTCATCATATTTCTTATTTATGGCTGTGGCAATGCCAGCGTGTACCAGTGGCATAGA  
 TGATTGCTATGGAGCCAATCCAGATTTTTCCCTGTGCTCTCAGGTGCTTATGGGCTGGGCTATTGGAGGA  
 CAGACTTATCAATTTCCAGATGAAGCTGCAGTTTCCATAGGGACACCTTTGGATCCTCAGTACATCCGGC  
 TAGAAATCCATTACAGCAATTTTGACTTGTTACCAGGTTTGATCGACAGCTCAGGGGTACGAATCTACTA  
 TACTCCAGAGCTACGGAAACATGATGTGGGGATTCTGCAAAACAGGCATCTTCTCTTTCCCTTACGGCTTT  
 TGCAATTCCAGCCAGTTTGATGAAATGAACGGGATGGCGGTTCCAGATATGCATGTCTTTGCCCTACTTGC  
 TTCACACCCACCTGGCTGGAAGAGGACTAAAAGCTGTTCAATACCGGAATGGTGAGCAGCTGGTGATCAT  
 CTGTGAGGACAATAAGTATGACTTCGGTCTGCAGGAGATACGGAACATGAAGGAAAATCGTCATAGTCAAA  
 TCAGGGGATGAGGTCTGGTTCGAATGCAACTTTCAGACACTGGATCGGTCACAGAGTACTTTTGGTGGGC  
 CAAAGCACCATGATGAGATGTGTCTCACATTTCTCTACTACCTCGTAACAACATCTCCAGTTGTAT  
 GGGCTACCCTGATATTTTGCATGTTGTGCATCAAGCAGGAGGCTCAGATGCATTTGGAAGGAAATG  
 ATGGCCATGGACTTTGTTGACTGGAACAATGAGACTGTCAAAAATTGCAGAGCATGCAGCCAAGGAGGCG  
 ATCAATTCGTCATCATTAAAACCATTTGATGAACTCCAGAGAAAACGAGACTGGTCTAGTCAGAGACATTAT  
 TATTCCAGAGCGGGCTGCCTGTCACAATCTTTCTGGACACCTCTCACTGCCGGGTCTGAAGGCTGTGCA  
 AACCTTCGTTTACTGCAGTACGCACTTCTGAGTCATCAACCACCAAAAGAACTGCTTCACTTCTCTAC  
 TTTCTCTCACACAGCTGGTGTGTTGCTTGGCTTATCTTGGCCTCTGAGTATGGGAAGTGA

>Fulmarus\_glacialis No=33 length=602 name="Northern fulmar"  
 MMAVLLSRIKMLFLLFLPCFCGQPPPPPLRFSIFLDPSKMYLRWDHDEQELMTFELQVHTTGWVAFG  
 FSSHGELPGSDIVIGGVFPNGSIYFSDCHVVDEATIEEDESQDYQLLSVTENETSTTMLFKRHLRTCDPN  
 DLLDITVDTARLVAAFGTDDTVPFFKQIFSKSLFLLRFRSPSTDPKIFFTYDLRLDNFAVPVEETKYACK  
 FIPLPMVKQKHIIYKFDPVITPHNITLVHHILYGCNASVLPSPGIDDCYGANPDFSLCSQVLMGWAIGG  
 QTYQFPDEAAVSIQTPLDPQYIRLEIHYSNFDLLPGLIDSSGVRIYYTPELRKHDVGIILQTGIFSFYGF  
 CNSSQFDEMNGMAVPMHVFAYLLHHLAAGRGLKAVQYRNGEQLVVICEDNKYDFGLQEIRNMKEIVIVK  
 SGDEVLVECNFQTLDRSQSTFGGPSTMNEMCLTFLFYPRNNISSCMGYPDILHVHVALKQEASDALEGM  
 MAMDFVDWNNETVKIAEHAAKEADQFVIKTIDELQRNETGLVRDIIIPERAACHNLSGHLSLPGLKAAA  
 NLRLTAVRTSESSTTKETASLPLLSLTQLVFAWLILASEYK

| Exon | NCBI Accession | Strand | Start | End   |
|------|----------------|--------|-------|-------|
| 1    | JJRN01045362.1 | +      | 15184 | 15471 |
| 2    | JJRN01045362.1 | +      | 18496 | 18642 |
| 3    | JJRN01045362.1 | +      | 20207 | 20362 |
| 4    | JJRN01045362.1 | +      | 21579 | 21662 |
| 5    | JJRN01045362.1 | +      | 22851 | 23018 |
| 6    | JJRN01045362.1 | +      | 23969 | 24071 |
| 7    | JJRN01045362.1 | +      | 24860 | 24987 |
| 8    | JJRN01045362.1 | +      | 26800 | 26891 |
| 9    | JJRN01045362.1 | +      | 30094 | 30190 |
| 10   | JJRN01045362.1 | +      | 30407 | 30466 |
| 11   | JJRN01045362.1 | +      | 31438 | 31568 |
| 12   | JJRN01045362.1 | +      | 31843 | 31957 |
| 13   | JJRN01045362.1 | +      | 32686 | 32925 |

### 34. Great cormorant (*Phalacrocorax carbo*)

| Exon | NCBI Accession | Strand | Start | End   |                                                |
|------|----------------|--------|-------|-------|------------------------------------------------|
| 1    | JMFI01047762.1 | -      | 15503 | 15784 | 5-nt deletion, 1-nt deletion, 1 nonsense codon |
| 2    | JMFI01047762.1 | -      | 11849 | 11994 | 1-nt deletion                                  |

|    |                |   |       |       |                                      |
|----|----------------|---|-------|-------|--------------------------------------|
| 3  | JMFI01047762.1 | - | 10180 | 10341 |                                      |
| 4  | JMFI01047762.1 | - | 8900  | 8968  | 5' deletion (7 nt), 7-nt deletion    |
| 5  | JMFI01047762.1 | - | 7543  | 7710  | 1 nonsense codon                     |
| 6  | JMFI01047762.1 | - | 6499  | 6601  | 1 nonsense codon                     |
| 7  | JMFI01047762.1 | - | 5561  | 5715  | 1 nonsense codon                     |
| 8  | JMFI01047762.1 | - | 3663  | 3754  |                                      |
| 9  | JMFI01047762.1 | - | 292   | 388   | splice donor TC                      |
| 10 | JMFI01138480.1 | - | 3788  | 3847  | 1 nonsense codon, splice donor CT    |
| 11 | JMFI01138480.1 | - | 2641  | 2771  |                                      |
| 12 | JMFI01138480.1 | - | 2247  | 2357  | 1 nonsense codon, 3' deletion (4 nt) |
| 13 | JMFI01138480.1 | - | 1258  | 1487  | 1-nt insertion, 11-nt deletion       |

### 35. Crested ibis (*Nipponia nippon*)

| Exon | NCBI Accession | Strand | Start | End   |                                 |
|------|----------------|--------|-------|-------|---------------------------------|
| 1    | JMFH01007490.1 | +      | 55645 | 55927 | 5-nt deletion                   |
| 2    | JMFH01007490.1 | +      | 58934 | 59079 | 1 nonsense codon, 1-nt deletion |
| 3    | JMFH01007490.1 | +      | 60657 | 60819 | 1-nt insertion                  |
| 4    | JMFH01007490.1 | +      | 62038 | 62121 |                                 |
| 5    | JMFH01007490.1 | +      | 63335 | 63502 |                                 |
| 6    | JMFH01007490.1 | +      | 64450 | 64552 |                                 |
| 7    | JMFH01007490.1 | +      | 65335 | 65501 |                                 |
| 8    | JMFH01007490.1 | +      | 67310 | 67401 |                                 |
| 9    | JMFH01007490.1 | +      | 70605 | 70701 |                                 |
| 10   | JMFH01007490.1 | +      | 70918 | 70977 |                                 |
| 11   | JMFH01007490.1 | +      | 71978 | 72108 |                                 |
| 12   | JMFH01007490.1 | +      | 72396 | 72510 |                                 |
| 13   | JMFH01007490.1 | +      | 73260 | 73495 | 4-nt deletion                   |

### 36. Little egret (*Egretta garzetta*)

| Exon | NCBI Accession | Strand | Start | End   |                                                       |
|------|----------------|--------|-------|-------|-------------------------------------------------------|
| 1    | JJRC01034364.1 | -      | 20167 | 20446 | 5-nt deletion, 1 nonsense codon                       |
| 2    | JJRC01034364.1 | -      | 16999 | 17133 | 1 nonsense codon                                      |
| 3    | JJRC01034364.1 | -      | 15236 | 15397 | splice acceptor TG, 1 nonsense codon, splice donor AT |
| 4    | JJRC01034364.1 | -      | 13929 | 14012 | splice acceptor CT                                    |
| 5    | JJRC01034364.1 | -      | 12629 | 12796 |                                                       |
| 6    | JJRC01034364.1 | -      | 11573 | 11675 |                                                       |
| 7    | JJRC01034364.1 | -      | 10628 | 10794 | 1 nonsense codon                                      |
| 8    | JJRC01034364.1 | -      | 8863  | 8954  |                                                       |
| 9    | JJRC01034364.1 | -      | 5585  | 5674  | 7-nt deletion                                         |

|    |                |   |      |      |                                                                   |
|----|----------------|---|------|------|-------------------------------------------------------------------|
| 10 | JJRC01034364.1 | - | 5309 | 5368 |                                                                   |
| 11 | JJRC01034364.1 | - | 4193 | 4335 | 13-nt insertion, 1-nt deletion, 1 nonsense codon, splice donor AT |
| 12 | JJRC01034364.1 | - | 3816 | 3930 | 1 nonsense codon                                                  |
| 13 | JJRC01034364.1 | - | 2845 | 3076 | 7-nt deletion, 1-nt deletion                                      |

### 37. Killdeer (*Charadrius vociferus*)

| Exon | NCBI Accession | Strand | Start | End  |               |
|------|----------------|--------|-------|------|---------------|
| 1    | JMFX02000767.1 | -      | 2694  | 2981 |               |
| 2    | JMFX02000805.1 | +      | 70    | 216  |               |
| 3    | JMFX02000805.1 | +      | 1779  | 1940 |               |
| 4    | JMFX02000805.1 | +      | 3118  | 3201 |               |
| 5    | JMFX02000805.1 | +      | 4394  | 4561 |               |
| 6    | JMFX02000805.1 | +      | 5496  | 5598 |               |
| 7    |                |        |       |      | exon deletion |
| 8    | JMFX02000806.1 | +      | 586   | 677  |               |
| 9    | JMFX02000806.1 | +      | 3973  | 4069 |               |
| 10   | JMFX02000806.1 | +      | 4284  | 4343 |               |
| 11   | JMFX02000806.1 | +      | 5365  | 5495 |               |
| 12   | JMFX02000806.1 | +      | 5771  | 5885 |               |
| 13   | JMFX02000806.1 | +      | 6616  | 6855 |               |

### 38. East African crowned crane (*Balearica pavonina gibbericeps*)

```
>Balearica_pavonina_gibbericeps No=38 length=1851 name="East African
crowned crane"
ATGATGGCAGTTCTCTTAAGAATCAAGGCTGTGCTCTTCCCTTGTTCCTCCCATCCTTTTTGTTCTGGTC
AGCCTGCACCTCCACTGCTGCATTTCTCCATCTTGCTGGAGCCTTCAAACATGGTCTACCTCCACTGGGA
CCATGACGAACAGGAGATGATGACATTTGAGCTGCAGGTCCATACAACCTGGCTGGGTGGCATTGGATTCT
AGCCCTCATGGAGAGTTGCTGCTGACATTGTGATAGGAGGTGCTTCCCAAATGGCAGCATCTACT
TCTCTGATTTTTCATGTGGTAGATGAGGCAACCCTTGAGGAAGATGAGAGCCAGGACTACCAACTGCTGTC
AGTAACGGAAAATGAGACCTCCACCACCATGCTGTTCAAGCGCCACTTCCGGACATGTGACGTGAATGAC
CTGGATATCACAATGGACACAGCAGCTCTTGTACTGCTTTTGGCACTGATTACACAGTCCAATTCCTTA
AAGGCCAAAGATTTTCCAACCTCTTTTTCTTGATGAGGTACAGAGGCCATCTGACCCAACCTGATCCCAA
AATATTCTTCACCTATGACCTGAGGCTGGACAATTTGCTGTTCCAGTTGAAGAAACCAAGTATGCCTGT
ACCTTTATCCCCTGCCCATGGTCAAGCAGAAAACCCATATCTACAAGTTCGAACCTACAATAACACCCC
ACAACATAACGTTGGTTTCATCATATTCTTGTTTACGCTGTGGCAACGCCAGCATGTTACCCAGTGGCAT
AGATGATTGCTACGGAGCCAATCCAGATTTTTCCCTGTGCTCTCAGGTGCTCATGGGCTGGGCTGTTGGA
GGACAGTCTTACCAATTTCCAGATGAAGCTGCAGTTTCATAGGGACACCTTGGGACCCCTCAGTACATCC
GACTAGAAAATCCATTACAGCAATTTTGATTTGTTACCAGGCTGGATCGACAGCTCAGGGATACGAATCTA
CTATACACCTGAGTACGGAAATATGACAGATCTTATGGTCTTTGCAATTCAGTCAGTTTGATGAAATGA
ATGGGATGCTGGTTCCAGATCTGCATGTCTTTGCCTACTTGTCTCACACTCATCTGTCTGGCAGAGGAGT
GAAAGCTGCTCAATACCGGAATGGTGAGCAGCTGAGGATCATCTGTGAGGACAATAAGTACGACTTCAGA
CTGCAAGAGATTCGAGACATTAAGGAAAATCCTCATAATCAAGCCAGGGGATGAGATCCTGGTTGAATGCA
ACTTCCAGACATTGGATCGGTGAGGGATTACTTTTGGTGGGCCAAGCACCATGAATGAGATGTGCTCAC
ATTCTCTTGTACTACCCTCATAACAACATCTCCAGTTGTATGGGCTACCCTGACATTTTGTACATTGCA
```

CACATACTCAAGCAGGAGGCCTCAGATACAGTGGAAGGAATGATGGCCATGGACTATGTTGACTGGGACC  
 ATGATACTGTCAAAATTGCAGAGAAAGCAGCCAAGGAGGCAGATCAAGTAGTCATGATTAACCATTAC  
 TGAGCTCCAGAGAAATGAGAGTGGTCTAATCAGAGACATTAGCATTCAGAGCAGGCTGCCTGTCACAAT  
 ATTTCTGGACACCTCTCACTGTCTGGGTCTGAGATCCACTGCAAATGTTGTTGACCGCACTATGCACCT  
 CTGAGTCATCAACCACCAAAGAAACTGCTTCACTTCCTCTTCTTCTCTCACACAGCTAGTGTGCTTG  
 GCTTACCTTGGCCTCTGAGTATAAGAAGTGA

>Balearica\_pavonina\_gibbericeps No=38 length=616 name="East African crowned crane"

MMAVLLRIKAVLFLFLPSFCSGQPAPPLLHFSILLEPSNMVYLHWDHDEQEMMTFELQVHTTGWVAFGF  
 SPHGELPGSDIVIGGVFPNGSIYFSDHFVVDDEATLEEDESQDYQLLSVTENETSTTMLFKRHFRTCDVND  
 LDITMDTARLVTAFGTDYTVQFFKQRFNSLFLMRYRGPSPDTPDKIFFTYDLRLDNFAVPVEETKYAC  
 TFIPLPMVKQKHIIYKFEPTITPHNITLVHHILVYACGNASMLPSGIDDCYGANPDFSLCSQVLMGWAVG  
 GQSYQFPDEAAVSIQTPWDPQYIRLEIHYSNFDLLPGWIDSSGIRIYYTPELRKYDVGLQGTGIFTFPVH  
 FIPPGAESYRSYGLCNSSQFDEMNGMLVDPDLHVFAYLLHTHLSGRGVKAAQYRNGEQLRIICEDNKYDFR  
 LQEIRDIKEILIIKPGDEILVECNFQTLDRSGITFGGPSTMNEMCLTFLLYYPHNNISSCMGYPDILYIA  
 HILKQEASDTEGMMAMDYVDWDHDTVKIAEKAAKEADQVVMIKTITELQRNESGLIRDISIPEQAACHN  
 ISGHLSSLGLRSTANVRLTALCTSESSTTKETASLPLLSLTQLVFAWLTLASEYKK

| Exon | NCBI Accession | Strand | Start | End   |
|------|----------------|--------|-------|-------|
| 1    | JJRR01082268.1 | +      | 2012  | 2296  |
| 2    | JJRR01082270.1 | +      | 246   | 392   |
| 3    | JJRR01082270.1 | +      | 1031  | 1192  |
| 4    | JJRR01082270.1 | +      | 2395  | 2478  |
| 5    | JJRR01082270.1 | +      | 3645  | 3812  |
| 6    | JJRR01082270.1 | +      | 4731  | 4833  |
| 7    | JJRR01082270.1 | +      | 5508  | 5674  |
| 8    | JJRR01082270.1 | +      | 7478  | 7569  |
| 9    | JJRR01082270.1 | +      | 10001 | 10097 |
| 10   | JJRR01082270.1 | +      | 10311 | 10370 |
| 11   | JJRR01082270.1 | +      | 11277 | 11407 |
| 12   | JJRR01082271.1 | +      | 7     | 121   |
| 13   | JJRR01082271.1 | +      | 859   | 1098  |

### 39. Hoatzin (*Opisthocomus hoazin*)

>Opisthocomus\_hoazin No=39 length=1869 name="Hoatzin"

ATGGCAGTTCTCCTCTCAACAATGAAGGGTATGCTCTTTCTCTTGCTCCTCCCATGCTTTTGTGTTTGGTC  
 AGCCTGCACCTCCACTGCTGCGTTTCTCCATCTTCTGAGCCTGCAAACAGGGTCTACCTCCACTGGGA  
 CCATGACGAAGAGGAGATGATGACATTTGAGCTGCAGGTCATACAACCTGGCTGGGTGGCATTGTTGATTC  
 AGCCCTGATGGAGAGTTACCTGGATCTGACATTTGATAGGAGGTGCTTCCCAAATGGCAGCATCTACT  
 TCTCTGATTGTCACGTGGTAGATCAAGCAACCCTTGAGGAAGATGAGAGCCAGGACTACCAACTGCTGTC  
 AGTGACAGAGAACGAGACCTCCACCACCATGCTGTTCAAACGCCACCTCCAAACATGTGACCCTAATGAC  
 CTGGATATCACAACGGACACAGCAGCCTTGTACTGCATTTGGCACTGACGACACAGTCCAATCTTTA  
 AAGGCCAAAGATTTTCCAGATCTTCTCCTGATGAGGTACAGAGGCCCATCAGACTCAACTGACCCCAA  
 AATATTCTTACCTATGACCTGAGGCTGGACAATTTTGTGTTCCAGCTGAAGAAACCAAGTATGCCTGC  
 ACCTTTATTCCACTGCCAGGGTCAAGCAGAAAACACCATATCTACAAGTTTGAACCTGTAATAACACCCC  
 ACAACATAACTTTGGTTCATCATATTCTTGTGTTATGCCTGTGGAAAACGCCAGCGTGTACCCAGCAGCAT  
 AGACGATTGCTATGGACCCAATCCGGATTTTGCCTGTGCTCTCAGGTGCTCGTGGGCTGGGCTGTGGGA  
 GGAGAGTCTTATCAATATCCAGAGGAAGCTGCAGTTTCCATAGGGACACCTTGGGACCTCAGTATGTCC  
 GACTAGAAATCCACTACAGCAATTTTGACTTGTACCAGGCTTGATCGACAGCTCAGGGATACGACTCTA

CTATACGCCAGAGCTGCGGAAATATGATGTGGGTGTTCTGCAAAACAGGCATCTTCACTTTCCCTGTGCAT  
TTCATTCCCTCCTGGTGCAGAATCCTACAGATCTTACGGCCTTTGCAACTCCAGCCAGTTTGTGAAATGA  
ATGGGATGCTGGTTCCAGATCTGCATGTCTTTGCCTACTTGCTTACACCCACCTATCTGGCAGAGGAGT  
GAAAGCTGCTCAATACCGGAATGGTGAGCAGCTGGGGATCATCTGCGAGGACAATAAGTACGACTTCAGC  
CTGCAGGAGGTTCCGGGACATGAAGGAAACCTCAGAGTCAGACCCGGGGATGAGATCCTGGTTGAATGCA  
ACTTTTCAGACACTGGATCGGTGAGGGATTACTTATGGTGGGCCAAGCACCATGAATGAGATGTGTCTCAC  
ATTCTTTTTTACTACCCTCGTAACAACATCTCCAGTTGTATGGGCTACCCTGATATTTTTGTACATTGCG  
CATGCACTCAAGCAGGAGGCCTCAGATGCAGTGGAAACAATCATGGCCTTGGACTTTGTTGACTGGGATA  
ACGAGACTGTCAAAATTGCAGAGAAAGTAGCCAAGGAGGCAGACCAAGTAGTCATGATTTAAACCATTAA  
TGAACTCCAGAGAAATGAGACTGGTCTAATCAGAGACATCAGTATTCAGAGTGGTCTCCCTGTACAAT  
ATTTCTGGACACCTCTCAATTTCTGGGCACCTCTCACCGTCAGGACTGAGGGCTGTACAAACCCTTGT  
TGACTGCAGTATGCACTTCTGAGTCATCAACCCTCAGAGAAACTGCTTCACCTCCTCTGCTTCTCTCAC  
TCAGCTCGTGTCTTCTTGGCTTGTCTTGGCCTCTGAGTATGGGAAGTGA

>Opisthocomus\_hoazin No=39 length=622 name="Hoatzin"  
MAVLLSTMKGMLFLLLLPCFCFGQPAPPLLRFSIFLEPANRVYLHWDHDEEEMMTFELQVHTTGWVAFGF  
SPDGELPGSDIVIGGVFPNGSIYFSDCHVVDQATLEEDESQDYQLLSVTENETSTTMLFKRHLQTCDPND  
LDITTDARLVTAFGTDDTVQFFKGRFSRSLLLMRYRGPSTDPKIFFTYDLRLDNFAVPAEETKYAC  
TFIPLPRVKQKHHIYKFEFVITPHNITLVHHILVYACGNASVLPSSIDDCYGNPNDFALCSQVLVWVAVG  
GESYQYPEEAASVIGTPWDPQYVRLIHYSNFDLLPGLIDSSGIRLYYTPELRKYDVGVLQGTGIFTFPVH  
FIPPGAESYRSYGLCNSSQFDEMNGMLVDPDLHFVAYLLHHTLSGRGVKAAQYRNQEQLGIICEDNKYDFS  
LQEVDRMKETLTVRPGDEILVECNFQTLDRSGITYGGPSTMNEMCLTFLFYPRNNISSCMGYPDILYIA  
HALKQEASDAVEAIMALDFVDWNETVKIAEKVAKEADQVVMIKTINELQRNETGLIRDISIPEWSPCHN  
ISGHLISGHLSPSGLRAATNPCLTAVCTSESSTLRETASPPLPLTQLVFSWLVLASEYVK

| Exon | NCBI Accession | Strand | Start | End   |
|------|----------------|--------|-------|-------|
| 1    | JMFL01069564.1 | -      | 4958  | 5242  |
| 2    | JMFL01069564.1 | -      | 1971  | 2117  |
| 3    | JMFL01038297.1 | +      | 401   | 562   |
| 4    | JMFL01038297.1 | +      | 1769  | 1852  |
| 5    | JMFL01038297.1 | +      | 2527  | 2694  |
| 6    | JMFL01069562.1 | -      | 40864 | 40966 |
| 7    | JMFL01069562.1 | -      | 39928 | 40094 |
| 8    | JMFL01069562.1 | -      | 39052 | 39143 |
| 9    | JMFL01069562.1 | -      | 35673 | 35769 |
| 10   | JMFL01069562.1 | -      | 35397 | 35456 |
| 11   | JMFL01069562.1 | -      | 34147 | 34277 |
| 12   | JMFL01069562.1 | -      | 33744 | 33858 |
| 13   | JMFL01069562.1 | -      | 32732 | 32989 |

#### 40. Red-crested turaco (*Tauraco erythrolophus*)

>Tauraco\_erythrolophus No=40 length=1842 name="Red-crested turaco"  
ATGATGGCAGTTCTCTTCTCAAGAATCAAGGGTATGCTCTTACTCTTGTCTTCTTATGCTTTTGTCTA  
GTCAGCCTGCACCTCCACTGCTGCGTTTCTCCATCTTCCCTGGATCCTTCAAACATGGTCTATCTCCGCTG  
GGACCATGACGAACAGGAGCTGATGACGTTTGGAGCTTCCAGGTCCACACAACCTGGCTGGGTGGCATTGGA  
TTCAGCCCTCATGGAGAGTTGCCTGGGTCTGACATTTGTGATAGGAGGTGTCTTCCCAAATGGCAGTATCT  
ACTTCTCTGATTGTGATGTGGCAGATGAGGCAACCTTGGAGGAAGATGAGAGCCAGGACTACCAACTGCT  
GTCAGTGACAGAGAATGAGACCTTACCACAATGCTATTTCAAACGCCACCTCCGGACATGTGACCCAAAT  
GACCTGGATATCACAGTGGACACAGCACGCCTCGTTACTGCGTTTGGCACTGATGACACAACCCAAATCT  
TTAAAGGCCAAAGATTTTCAAATCTCTTTTCTTGTATGAGGTACAGAGGCCCATCTGACTCAACTAACCC

CAAAATATTCTTCACCTATGACCTGAGGCTGGACAATTTTGTCTGTTCCAGTTGAAGAAACAAAGTATGCC  
TGTACCTTTTATCCCATTGCCCATGGTCAAGCAGAAACACCATATCTACAAGTTTGAGCCTGTAATAACAC  
CCCACAACATAACCTTAGTTTCATCATATTTCTGTTTATGCCTGTGGCAACGCCAGTGTGTTACCCAGTGG  
CGTAGACGATTGTTATGGAGCCAATCCAGATTTTGCCTGTGCTCGCAGGTGCTTGCAGGCTGGGCTGTT  
GGAGGAGAGTCTTACCAGTTTCCAGATGAAGCTGCAATTTCCATAGGGACACCTTTGGATCCTCAGTATG  
TCCGACTAGAAATCCATTACAGCAATTTTGACTTGTACCAGGCTTGATTGACAGCTCGGGGGTACGAAT  
CTACTATACGCCGGAGCTACGGAAATATGATGCGGGGGTCTGCAAACAGGAGTCTTCACTTTCCCTGTG  
CATTTTATTCTCTGGAGCAGAATCCTACAGATCTTATGGCCTTTGCAATTCAGCCAGTTTGATGAAA  
TTAATGGGATGCTGGTTCCAGATCTGCATGTCTTTGCCTACATGCTTACACCCACCTGTCTGGCAGAGG  
ATTGAAAGCTGCTCAATACCGGAATGGTGAAGCAGTTGAGGATCATCTGTGAGGACAATAAGTATGACTTC  
AAACTGCAGGAGATTCCGGATATGAAGGAAATCATCATAATCAAACCAGGGGATGAGATCCTGGTTGAAT  
GCAACTTTTCAGACGCTGGATCGGTCAGGGATTACTTTTGGTGGGCCAAGCACCATGAACGAGATGTGTCT  
CACATTCCTCTTACTACTACCTCGTAACAACATCTCCAGTTGTATGGGCTACCTGACATTTTGTACATT  
GCTCAGGCACCTCAAGCAGGAGGCTCAGATGCAGTGGAAGGAATGATGGCCATGGACTTTGTTGACTGGG  
ACAATGAGACTGTCAAAATTGCAGAGAGAGCAGCCAAAGAGGCAGATCAAGTAGTCATGATTAAAACCAT  
TAATGAACTCCAGAGAAATGAGAGTGGTCTAATCAGAGACATTAGTATTCCAGAGCGGGCTACCTGTCCAC  
AATATTTCTGGACACCTCTCACTGTGAGGTCTGAGGGCGACTGCAAACCTTTGTTTACTGCTGTACACA  
CTCCTGAGTCATCAACCACAAAGAAACTGCTTCGTTTCTCTTCTTCCCTCACACAGCTGGTGTGTTGC  
TTGGCTTTTATTGGCCTCTTGA

>Tauraco\_erythrolophus No=40 length=613 name="Red-crested turaco"  
MMAVLFSTRKGMLLLLLFFLCFCSSQPAPPLLRFSIFLDPSNMVYLRWDHDEQELMTFELQVHTTGWVAFG  
FSPHGELPGSDIVIGGVFPNGSIYFSDCHVADEATLEEDSQDYQLLSVTENETSTMLFKRHLRTCDPN  
DLDITVDTARLVTAFTGDDTTQFFKQRFKSLFLMRYRGPSTSTNPKIFFTYDLRLDNFAVPVEETKYA  
CTFIPLPMVKQKHIIYKFEPVITPHNITLVHIIHLYACGNASVLPSPGVDDCYGANPDFALCSQVLAGWAV  
GGESYQFPDEAAISIGTPLDPQYVRLEIHYNSFDLLPGLIDSSGVRIYYTPELRKYDAGVLQTVGFVTFPV  
HFIPPGAESYRSYGLCNSSQFDEINGMLVPLDHLVFAFMLHTHLSGRGLKAAQYRNGEQLRICEIDNKYDF  
KLQEIIRDMKEIIIIKPGDEILVECNFQTLDRSGITFGGPSTMNEMCLTFLFYPRNNISSCMGYPDILYI  
AQALKQEASDAVEGMMAMDFVDWNETVKIAERAAKEADQVVMIKTINELQRNESGLIRDISI PERATCH  
NISGHLSSLRATANLCLTAVHTPESSTTKETASFPLLSLTQLVFAWLLLAS

| Exon | NCBI Accession | Strand | Start | End   |
|------|----------------|--------|-------|-------|
| 1    | JNOY01030931.1 | -      | 891   | 1178  |
| 2    | JNOY01087376.1 | -      | 1072  | 1218  |
| 3    | JNOY01132768.1 | +      | 567   | 728   |
| 4    | JNOY01022207.1 | +      | 238   | 321   |
| 5    | JNOY01022207.1 | +      | 1515  | 1682  |
| 6    | JNOY01022207.1 | +      | 2221  | 2323  |
| 7    | JNOY01022207.1 | +      | 2987  | 3153  |
| 8    | JNOY01022207.1 | +      | 4230  | 4321  |
| 9    | JNOY01022207.1 | +      | 7279  | 7375  |
| 10   | JNOY01022207.1 | +      | 7592  | 7651  |
| 11   | JNOY01022207.1 | +      | 8665  | 8795  |
| 12   | JNOY01022207.1 | +      | 9080  | 9194  |
| 13   | JNOY01022207.1 | +      | 9952  | 10179 |

#### 41. MacQueen's bustard (*Chlamydotis undulata macqueenii*)

>Chlamydotis\_undulata\_macqueenii No=41 length=1854 name="MacQueen's bustard"  
ATGAAGGCAGTTGTCTTCTCAAGAATTAAGAGTATGCTCTTCTCTTGTCTTCCCATGGTTTTGTTCTG



GTCAGACTGCACATCCACTGCTGCGTCACTCCATCTTCTGGATCCTTCAAACATGGTCTACTTCCGCTG  
GGACCATGATGAACAGGAGCTGATGACGTTTGGAGCTGCAGGTCCATACAGCTGGCTGGGTGGCTTTTGG  
TTCAGCCCTTATGGAGAGTTGCCTGGATCTGACATTGTGATAGGAGGTGCCTTCCCAAATGGCAGCATCT  
ACTTCTCTGATTGCCATGTGGTAGACGAGTCAACCTTGGAGGAAGATGAGAGCCAGGACTACCAGTTGCT  
GTCACTGACAGAGAATGAGACCTCCACCACCATGCTGTTCAAACGCTACTTCCAGACATGTGACCCAAAT  
GACTTAGATATCACAATGGACACAGCAGCCTCATAACTGCCTTTGGTACTGATGACACAGTCCAATTCT  
TTAAAGGCCAAAGATTTTCCAAGTCTCTTTTCTTGATGAGGTACAGAGGCCCATCTGACTCAACTGATCC  
AAAAATATTCTCACCTATGACCTGACGCTGGACAATTTTGTGTTCCAGTTGAAGAAACCAAGTATGCT  
TGTACCTTTATCCCCTGCCCATGGTCAAGCAGAAACACCATATCTACAAGTTTGAACCTGTAATAACAC  
CCCACAACATAACCTTGGTTCATCACATTCTTGTATGCTTGTGGCAATGCCAGCATGTTACCCAGTGG  
CATAGATGACTGCTATGGAGCCAATCCAGATTTTGCCTGTGCTCTCAGGTGATTGTAGGCTGGGCTGTT  
GGAGGAAAGTCTTATCAATTTCCAGATGAAGCTGCAATTTCCATAGGGGCACCTCTGGATCCTCAGTATG  
TCCGACTAGAAATCCATTACAGCAATTTTACTGTTTACCAGTTTGTATCGACAGCTCAGGGATACGAAT  
CTACTATACTCCAGAGCTACGGAAATATGATGTGGGGATTCTGCAAACAGGCATCTTCACTTTTCTGTG  
CATTTTCACTTCTCTGGAGCAGAATCCTACAGATCTTACGGCCTTTGCAATTCCAGCCAGTTTGAAGAAA  
TGAATGGGATGCTGGTTCCAGATCTGCATGTCTTTGCCTACTTGGCTTACACCCCACCTGTCTGGCAGAGG  
AGTGAAAGCTGTTCAATACCGGAATGGTGAACAGCTGAGGATCATCTGTGAGGATAATAAGTATGACTTC  
AGACTACAGGAGATTCCGGATATGAAGGAAATCCTCATAATCAAACAGGGGATGAGATCCTGGTCCGAAT  
GCAACTTTTACAGACTGGATCGCTTAAAGATTACTTTTGGTGGGCCAAGCACCATGAACGAGATGTGTCT  
CACATTTCTCTTCTACTACCCTCGTAACAACATCTCCAGTTGTATGGGCTACCCTGACATTTTGTACATT  
GCACACGTACTCAAGCAGGAGGCGTCAGATGCAGTGAAGGAATGATGGCCATGGACTTTTGTGACTGGG  
ACAACGATACTGTCAAATTTGCAGAGAAAGCAGCCAAGGAGGCAGATCAAGTAGTCATGATTAACCAT  
TAATGAACTCCAGAGAAATGAGAGTGGTCTAATCAGAGACATTAGTATGCCAGAGCGGGCTGCCTGTCAC  
AATATTTCTGGACACTTCCCCTGTCAGGTCTGAGGGCCACTGCAAACCTTCGTTTACTGTCAGTATGCA  
CTTCTGAATCATCAACCAACAAAAGAACTACTTCACTGCCTCTTCTTTCTCTCACACAGCTGGTGTGTC  
TTGGCTTATCTTGGCCTCTGTGTATGGGAAATGA

>Chlamydotis\_undulata\_macqueenii No=41 length=617 name="MacQueen's bustard"  
MKAVVFSRIKSMFLFLLPWFCSGQTAHPLLRHSIFLDPSNMVYFRWDHDEQELMTFELQVHTAGWVAFG  
FSPYGELPGSDIVIGGAFPNGSIYFSDCHVVDESTLEEDESQDYQLLSLTENETSTMLFKRYFQTCDPN  
DLDTMDTARLITAFGTDDTVQFFKGRFSKSLFLMRYRGPSTDPKIFLTYDLTLDNFAVPVEETKYA  
CTFIPLPMVKQKHIIYKFEPVITPHNITLVHHILVYACGNASMLPSGIDDCYGANPDFALCSQVIVGWAV  
GGKSYQFPDEAAISIGAPLDPQYVRLEIHYSNFDLLPGLIDSSGIRIYYTPELRKYDVGILQGTGIFTFPV  
HFIPPGAESYRSYGLCNSSQFDEMNGMLVPLDHLVFAYLHHLTHLSGRGVKAVQYRNGEQLRIRICEDNKYDF  
RLQEIRDMEKELI IKPGDEILVECNFQTLDRKLTFFGGPSTMNEMCLTFLFYPRNNISSCMGYPDILYI  
AHVLKQEAASDAVEGMMAMDFVDWDNDTVKIAEKAAKEADQVVMIKTINELQRNESGLIRDISMPERAACH  
NISGHFPLSGLRATANLRLTAVCTSESSTNKRTTSLPLLSLTQLVFAWLILASVYGK

| Exon | NCBI Accession | Strand | Start | End   |
|------|----------------|--------|-------|-------|
| 1    | JMFJ01015205.1 | -      | 15272 | 15559 |
| 2    | JMFJ01015205.1 | -      | 11272 | 11418 |
| 3    | JMFJ01015205.1 | -      | 9555  | 9716  |
| 4    | JMFJ01015205.1 | -      | 8295  | 8378  |
| 5    | JMFJ01015205.1 | -      | 6921  | 7088  |
| 6    | JMFJ01015205.1 | -      | 6105  | 6207  |
| 7    | JMFJ01015205.1 | -      | 5170  | 5336  |
| 8    | JMFJ01015205.1 | -      | 3299  | 3390  |
| 9    | JMFJ01015205.1 | -      | 455   | 551   |
| 10   | JMFJ01015205.1 | -      | 165   | 224   |
| 11   | JMFJ01097322.1 | +      | 671   | 801   |
| 12   | JMFJ01097322.1 | +      | 1090  | 1204  |
| 13   | JMFJ01097322.1 | +      | 1937  | 2176  |

## 42. Common cuckoo (*Cuculus canorus*)

```
>Cuculus_canorus No=42 length=1854 name="Common cuckoo"
ATGATGGCAGTTCTTCTTCTCAAGAATCAAAGGTATGCTCTTCCCTTTTATTCCCTCCCACGCTTTTGTTCCTG
GTCAGCCTGCACTGCCACTGCTGCGTTTCTCCACCTTCCCTGGATCCTTCAAACATGGTCTATCTCCGCTG
GGACCATGATGAACAGGAGCTGATGACGTTTGGAGCTGCATGTCCACACAACAGGCTGGGTGGCATTGGA
CTCAGCCTTACGGAGAGTGGCCTGGATCAGACGTTGTGATAGGAGGTGTCTTCCCAAATGGCAGCATCT
ACTTCTCTGACTGTCATATGGTAGATGAAGCAATCCTTGAGGAAGATGACAGCCAGGACTACCAATTGCT
GTCAGTGACAGAGAATGAGACATGCACCACCATGCTGTTTCAGACGCCACTTCAGGACATGTGACCCAAAT
GACCTTGATATTACAGTGGACACAGCACGCTCTCATTACTGCTTTTGGTACAGATGACACCATCCAGTTTG
TTAAAGGCCAAAGATTTTCCAAATCTCTTTCCCTTGATGAGGTACAGAGGCCCATCTGACTTAACTGACCC
CAAATATTCTTCACTTATGACCTGAGGCTGGACAATTTCCCTGTTCAGTTGAAGAAACCAAATATGCC
TGTACCTTTTATCCCCTGCCCATAGTCAAGCAGAAGCACCATATCTACAAGTTTGAACCTGTAATAACAC
CACACAACACAGCCTTGGTTACCATATTTCTTGTATGCCTGTGGCAATGCCAGTGTGTTGCCAGTGG
CATTGATGATTGCTATGGAGCCAACCCAGATTTTGCCTGTGCTCTCAGGTGATTGCAGGCTGGGCAGTT
GGAGGAGAGTCTTATCAATTTCCAGATGAAGCTGCAATTTCCATAGGGACACCCTGGGACCCCTCAGTATG
TCCGACTAGAAATCCATTACAGCAATTTGACTTGTACCAGGTTTGTATCGACAGCTCGGGGCTACAAAT
CTACTACACTCCAGACTACGGAAATATGATGTGGGGTCTGCAAACAGGCATCTTCACTTTCCCTGTG
CATTTTCACTTCCCTGAGACGAATCCTACAGATCTTATGCGCTTTCGCAATTCAGCCAGTTTGACGAAA
TGAATGGGATGCTTGTTCCTGATATGCATGTCTTTGCTACTTGCTTCACACCCACCTGTCTGGCAGAGG
AGTGAAGAACTGTTCAATACCGGAATGGTAAGCAGCTGAACATCATCTGTGAAGACAATAAATATGACTTT
GGACTTCAGGAATTTTCAGACATGAAGGAAATCCTCATAATCAAACCAGGGGATGAAATCCTGGTTGAAT
GCAATTTTTCGAACACTGGATCGGTGAGAGATTACTTTTGGTGGGCTAAGCACAATGAATGAGATGTGTCT
CACATTCCTCTTCTACTATCCTCGTAACAACATCTCCAGTTGTATGAGCTACCCCTGACATTTTGTACATT
GCACATGAACTCAAGCAAGAGGCCTCAGATGCAGTAGAAGGAATGATGGCCATGTACCTTGTGACTGGG
ACAATGATACTATCAAAACTGCAGAGAAAGCAGCCAAGGAAGCAGATCAAGTAGTCACGATTAAGACCAT
TAATGAACTCCACAGAAATGAGAGTGGTCTAATCAGAGACATAAGTATTCAGAGAGGGCTGCCTGTCAC
AATATTTCTGGACACCTCTCACTATCAGGTCCAAGGGCCTCTGCAAACCTTCGTTTGACCGCAGCATGCA
CTTTGGAGTACCAGCCACCAAAGGAAGTCTTCACTTCCCTCTTCTTCTCTCACACAGCTGGTGTGTTGT
TTGGCTTATCTTGACTTCTGAGTATGGACAGTGA
```

```
>Cuculus_canorus No=42 length=617 name="Common cuckoo"
MMAVLFPSRIKGMFLFLPRFCSGQPALPLLRFSSTFLDPSNMVYLRWDHDEQELMTFELHVHTTGWVAFG
LSLHGEWPGSDVVIIGGVFPNGSIYFSDCHMVDEAILEEDDSQDYQLLSVTENETCTTMLFRRHRFRTCDPN
DLDITVDTARLITAFGTDDTIQFVKGQRFKSKLSLMRYRGPSDLTDPKIFFTYDLRLDNFVFPVEETKYA
CTFIPPLPIVKQKHHIYKFEPVITPHNTALVHHILVYACGNASVLPSPGIDDCYGANPDFALCSQVIAGWAV
GGESYQFPDEAAISIGTPWDPQYVRLEIHYSNFDLLPGLIDSSGLQIYYTPELRKYDVGVLTGIGIFTFPV
HFIPPGAESYRSYGLCNSSQFDEMNGMLVPMHVFAYLLHHLTHLSGRGVKTVQYRNGKQLNIICEDNKYDF
GLQEFRDMKEILIKPGDEILVECNFRTLDRSEITFGGLSTMNEMCLTFLFYPRNNISSCMSYPDILYI
AHELKQEASDAVEGMMAMYLVDWDNDTIKTAEKAAKEADQVVTIKTINELHRNESGLIRDISIPIPERAACH
NISGHLSSLGPRASANRLTAACLTLESPATKGTASLPLLSLTQLVFWLILTSEYGQ
```

| Exon | NCBI Accession | Strand | Start | End   |
|------|----------------|--------|-------|-------|
| 1    | JNOX01069217.1 | +      | 39724 | 40011 |
| 2    | JNOX01069217.1 | +      | 43187 | 43333 |
| 3    | JNOX01069217.1 | +      | 44863 | 45024 |
| 4    | JNOX01069217.1 | +      | 45938 | 46021 |
| 5    | JNOX01069217.1 | +      | 47136 | 47303 |
| 6    | JNOX01069217.1 | +      | 48243 | 48345 |
| 7    | JNOX01069217.1 | +      | 49962 | 50128 |
| 8    | JNOX01069217.1 | +      | 51900 | 51991 |
| 9    | JNOX01069217.1 | +      | 56602 | 56698 |
| 10   | JNOX01069217.1 | +      | 56912 | 56971 |

|    |                |   |       |       |                                             |
|----|----------------|---|-------|-------|---------------------------------------------|
| 11 | JNOX01069217.1 | + | 57730 | 57860 |                                             |
| 12 | JNOX01069218.1 | + | <1    | 83    | 5' partial (32-nt; recovered from WGS data) |
| 13 | JNOX01069218.1 | + | 832   | 1071  |                                             |

### 43. Chuck-will's-widow (*Caprimulgus carolinensis*)

```
>Caprimulgus_carolinensis No=43 length=1854 name="Chuck-will's-widow"
ATGATGGCAGTTGTCTTCTCAAGGATCAAGGGTATTCTCTTCTCTTCTGTTTCTCCCATGCTTTTGTCTG
GTCAGCCTGCACCTCCACTTCTGCGTTTCTCCATCTTCTGGATCCTTCAAACATGGTCTACCTCCGCTG
GGACCATGACGAACAGGAGCTGATGACGTTTGGAGCTGCAGGTCCATACAACCTGGCTGGGTGGCATTGGA
TTCAGCCCTCATGGAGAGTTGCCTGGATCTGACATTGTGATAGGAGGCATCTTCCAAATGGCAGCATCT
ACTTCTCTGACTGTCATGTGGTAGATGAGGCAACCTTGAAGAAGATGAGAGTCAGGACTACCAACTGCT
GTCAGTAACAGAGAATGAGACCTCCACTACGATGCTGTTCAAACGCCACCTCCGGACATGTGACCCAGAT
GACCAGGACATCACAATGGACACAGCAGCCTCATTACTGCACTTGGCACTGATGACACAGTCCAATTCT
TTCAAGGCCAAAGATTTTCCAAATCTCTTTTCTTGTATGAGGTACAGAGGCCCATCTGACTCAACTGATCC
CAAAATATTCTTACCTATGACTTGGAGCTAGACAATTTTGTCTTCCAGCTGAAGAAACCAAGTATGCC
TGTACCTTTATCCCCTGCCCATGGTCAAGCAGAAAACCCATATCTACAAGTTCGAACCTGTAATAACAC
CGCACAAACATAACCTTGGTTCATCACATTCTCGTTTATGCCTGTGGCAACGCCAGTGTGCTGCCACTGG
CATAGATGATTGCTATGGAGCCAATCCAGACTTTGCCCTCTGCTCTCAGGTGTTTGTGGGCTGGGCTGTT
GGAGGAGAGTCTTACCAATTTCCAGATGAAGCTGCAATTTCCATAGGGACACCTTGGGATCCTCAGTACG
TCCGACTAGAAATCCATTACAGCAATTTTGGACTTGTACCAGTTTGTATCGACAGCTCAGGAGTACGAAT
TTACTATACACCAGAGCTAAGGAAACATGATGTGGGGTACTGCAAACAGGCATCTTCACTTCCCTGTG
CATTTTCATTCCTCTGGAGCAGAATCCTACAGATCTTATGGCTTCTGCAATTCAGCCAGTTTGTATGAAA
TGAATGGGATGCTGGTTCCGGATCTACATGTCTTTGCCTACTTGGCTTACACCCACCTTTCTGGCAGAGG
AGTGAAGCTGCTCAGTACCGGAATGGTAAGCAGCTGGGTATACTCTGTGAGGACAATAAGTATGACTTC
AGACTGCAGGAGATTCCGGACATGAAGGAAATCCTCATAATCAAACCGGGGGATGAGATCCTGGTTGAAT
GCAACTTTTCCAGACTGGATCGGTGAGAGATTACTTTTGGTGGGCCAAGCACCATGAATGAAATGTGTCT
CACATTCCTCTTCTACTACCTCGTAACAACATCTCCAGTTGTATGGGCTACCTGACATTTTGTATGTT
GCGCATGTACTGAAGCAGGAGCCCTCAGATGCAGCGGAAGGAATGATGGCCATGGAATTTGTGACTGGG
ACAATGAGACTGTGAGAATTGCAGAGAAAAGCAGCCAAAGGAGCAGATCAAGTAGTAATGATTAACCAT
TAACGAACTCCAGAGAAAATGAGACTGGACTAATCAGAGACATCAGTATTCAGAGCGGGCTGCTTGTAC
AATATTTCTGGATATCTCTCACTGTACATCTGAGGGCCACTGCAAATCTCCGTTTGGACCGCAGTATGTG
CTTCTGAGTCATCAACCACTAAAGAACTGCTTCACTTCCCTTCTTTATCTCACACAGCTGGTGTGTTG
TTGGCTTATCTTGGCCCTGAGCATGGGAAATGA
```

```
>Caprimulgus_carolinensis No=43 length=617 name="Chuck-will's-widow"
MMAVVSRIKGIILFLFLPCFCGQPAPPLLRFSIFLDPNSMVYLRWDHDEQELMTFELQVHTTGWVAFG
FSPHGELPGSDIVIGGIIFPNSIYFSDCHVVDDEATLEEDESQDYQLLSVTENETSTTMLFKRHLRTCDPD
DQDITMDTARLITALGTDDTVQFFQGRFSKSLFLMRYRGPSTDPKIFFTYDLRLDNFAVPAEETKYA
CTFIPLPMVKQKHIIYKFEPIVITPHNITLVHHILVYACGNASVLPPTGIDDCYGANPDFALCSQVFGWAV
GGESYQFPDEAAISIGTPWDPQYVRLEIHYSNFDLLPGLIDSSGVRIYYTPELRKHDVGVLQGTGIFTFPV
HFIPPGAESYRSYGFNCSSQFDEMNGMLVPLDHLVFAVYLLHTHLSGRGVKAAQYRNGKQLGILCEDNKYDF
RLQEIRDMKEILIIKPGDEILVECNFQTLDRSEITFGGPSTMNEMCLTFLFYPRNNISSCMGYPDILYV
AHVLKQEAASDAAEAGMMAMEFVDWDNETVRIAEEKAAKEADQVVMIKTINELQRNETGLIRDISIPEAACH
NISGYLSLSHLRATANLRLTAVCASESSTTKETASLPLLYLTQLVFAWLILAPEHGK
```

| Exon | NCBI Accession | Strand | Start | End   |
|------|----------------|--------|-------|-------|
| 1    | JMFU01059780.1 | -      | 10639 | 10926 |
| 2    | JMFU01059780.1 | -      | 7454  | 7600  |
| 3    | JMFU01059780.1 | -      | 5758  | 5919  |
| 4    | JMFU01059780.1 | -      | 4496  | 4579  |
| 5    | JMFU01059780.1 | -      | 3156  | 3323  |
| 6    | JMFU01059780.1 | -      | 2092  | 2194  |

|    |                |   |       |       |
|----|----------------|---|-------|-------|
| 7  | JMFU01059780.1 | - | 1136  | 1302  |
| 8  | JMFU01059779.1 | - | 16547 | 16638 |
| 9  | JMFU01059779.1 | - | 15600 | 15696 |
| 10 | JMFU01059779.1 | - | 15320 | 15379 |
| 11 | JMFU01059779.1 | - | 14194 | 14324 |
| 12 | JMFU01059779.1 | - | 13809 | 13923 |
| 13 | JMFU01059779.1 | - | 12822 | 13061 |

#### 44. Anna's hummingbird (*Calypte anna*)

| Exon | NCBI Accession | Strand | Start | End   |                     |
|------|----------------|--------|-------|-------|---------------------|
| 1    | JJRV01124598.1 | -      | 37141 | 37431 |                     |
| 2    |                |        |       |       | exon deletion       |
| 3    |                |        |       |       | exon deletion       |
| 4    | JJRV01124598.1 | -      | 33905 | 33988 |                     |
| 5    | JJRV01124598.1 | -      | 32551 | 32718 |                     |
| 6    | JJRV01124598.1 | -      | 31520 | 31622 |                     |
| 7    | JJRV01124598.1 | -      | 30696 | 30854 | 8-nt deletion       |
| 8    | JJRV01124598.1 | -      | 30252 | 30343 |                     |
| 9    | JJRV01124598.1 | -      | 28000 | 28096 |                     |
| 10   | JJRV01124598.1 | -      | 27739 | 27798 |                     |
| 11   | JJRV01124598.1 | -      | 26641 | 26771 |                     |
| 12   | JJRV01124598.1 | -      | 26307 | 26362 | 3' deletion (59 nt) |
| 13   |                |        |       |       | exon deletion       |

#### 45. Flamingo (*Phoenicopterus ruber ruber*)

```
>Phoenicopterus_ruber_ruber No=45 length=1854 name="Flamingo"
ATGATGGCAGTTCTCTTCTCGAGAATCAAGGGTACGCTCTTCCTCTGTTCCTCCCATGCTTTTGTTCCTG
GTCAGCCTGCACCTCCACCGCTGCGTTTTCTCCATCTTCCTGGATCCTTCAAACATGGTCTACCTCCGCTG
GGACCACGATGAACAGGAGCTGATGACGTTTGAGCTGCAGGTCCATACTGGCTGGGTGGCATTGGGA
TTCAGCCCTCATGGAGAGTTGCCTGGATCTGACATTGTGATAGGAGGTGTCTTCCCAAATGGCAGCATCT
ACTTCTCTGATTGTCATGTGGTAGATGAGGCAACCTTGAGGAAGACGAGAGCCAGGACTACCAACTGCT
GTCAGTGACGGAGAATGAGACCTCCACCACTATGCTGTTCAAACGCCACCTCCGGACGTGCGACCCAAAT
GACCTGGATATCTCAATGGACACAGCAGCCTCGTTACTGCATTTGGCACTGATGACACAGTCCAATTCT
TTAAAGGCCACAGATTTTACAAATCTCTTTCTTGATGAACTACAGAGGCCATATGACTCAACTGACCC
CAAATATTCTCTACCTATGACCTGAGGCTGGACAATTTTGTCTGTTCCAGCTGAAGAAACCAAGTATGCC
TGTACCTTTTATCCCACTGCCCATGGTCAAGCAGAAACACCATATCTACAAGTTTGAACCTGTAATAACAC
CCCACAACATAACCTTGGTTTCATCATATTCTTGTGTTTACGCCTGTGGCAACGCCAGCGTGTACCCAGTGG
CATAGATGATTGCTATGGAGCCGATCCAGATTTTGCCTGTGCTCTCAGGTGCTTGTGGGGCTGGGCTGTT
GGAGGAGAGTCTTACCAATTTCCAGATGAAGCTGCAGTTTCCATAGGGACACCTTGGGACCCCTCAGTATG
TCCGACTAGAAATCCATTACAGCAATTTTACTTGTAGCAGGCTTGATCGACAGCTCGGGGGTACGAAT
CTACTATACGCCTGAGCTACGGAAATATGATGTGGGGGTTCTGCAAACAGGCATCTTCACTTTCCCTGTG
CATTTTCATTCTCTGAGCAGAATCCTACAGATCTTACGGCCTGTGCAATTCAGCCAGTTTGATGAAA
TGAATGGGATGCCAGTTCCAGATCTGCATGTCTTTGCCTACTTGCTTACACCCACCTGTCTGGCAGAGG
AGTGAAAGCTGCTCAATACCGGAATGGTGGAGCAGCTAGGGATCATCTGTGAGGACAATAAGTATGATTTT
```

AGACTGCAGGAGATTTCGGGACATGAAGGAAATCCTCACAATCAAATCAGGGGATGAGATCCTGGTCAAT  
 GCAACTTTTCAGACACTGGATCGGTGAGAGGTTACTTTTGGTGGGCCAAGCACCATGAATGAGATGTGTCT  
 CACATTCCTCTTCTACTACCCTCGTAACAACATCTCCAGTTGTATGAGCTACCCTGACATTTTGTACATT  
 GCACATGTACTCAAGCAGGAGGCCCTCAGATGCAGCGGAAGGAATGATGGCCATGGAATTTGTTGACTGGG  
 ACAATGAGACTGTCAGAATTGCAGAGAAAGCAGCCAAGGAGGCAGATCAAGTAGTCATCATTAAAACCAT  
 TAATGAACTCCAGAGAAATGAAAGTGGTCTAATCAGAGACATTAGTATTCAGAGCGGGCTGCCTGTCAC  
 AATATTTTCTGGACACCGCTCACGGTCTGAGGGCCACTGCAAACCTTCGTTTGACCCGAGCATGCA  
 GTTCCGAGTCATCAACTACCAAAGAAAGTTCTTCACTTCTCTTCTTCTCTCACACAGCTGGTGTTCG  
 TTGGCTTGTCTTGGCCTCTGAGTACGGGAAGTGA

>Phoenicopterus\_ruber\_ruber No=45 length=617 name="Flamingo"  
 MMAVLFSRIGKTLFLLFLPCFCGQPPPPPLRFSIFLDPSNMVYLRWDHDEQELMTFELQVHTTGWVAFG  
 FSPHGELPGSDIVIGGVFPNGSIYFSDCHVVDEATLEEDESQDYQLLSVTENETSTTMLFKRHLRCDPN  
 DLDISMDTARLVTAFTDQVFFKGRFYKSLFLMNYRGPYDSTDPKIFSTYDLRLDNFAVPAEETKYA  
 CTFIPLPMVKQKHIIYKFEFVITPHNITLVHHILVYACGNASVLPSPGIDDCYGADPDFALCSQVLVWAV  
 GGESYQFPDEAAVSIGTPWDPQYVRLEIHYSNFDLLAGLIDSSGVRIYYTPELRKYDVGVLTGTGIFTFPV  
 HFIPPGAESYRSYGLCNSSQFDEMNGMPVVDLHVFAVLLHTHLSGRGVKAAQYRNQEQLGIICEDNKYDF  
 RLQEIIRDMKEILTIKSGDEILVECNFQTLDRSEVTFGGPSTMNEMCLTFLFYPRNNISSCMSYPDILYI  
 AHVLKQEAASDAEAGMMAMEFVDWDNETVRIAEEKAAKEADQVVIKKTINELQRNESGLIRDISIPERAACH  
 NISGHRSRSLRATANLRLTAACSSSESSTTKESSLPLLSLTQLVFAWLVLASEYVK

| Exon                                        | NCBI Accession | Strand | Start | End   |
|---------------------------------------------|----------------|--------|-------|-------|
| 1                                           | JJRE01063800.1 | -      | 944   | >1204 |
| 5' partial (27 nt; recovered from WGS data) |                |        |       |       |
| 2                                           | JJRE01063799.1 | -      | 7402  | 7548  |
| 3                                           | JJRE01063799.1 | -      | 5758  | 5919  |
| 4                                           | JJRE01063799.1 | -      | 4300  | 4383  |
| 5                                           | JJRE01063799.1 | -      | 2936  | 3103  |
| 6                                           | JJRE01063799.1 | -      | 1904  | 2006  |
| 7                                           | JJRE01063799.1 | -      | 1056  | 1222  |
| 8                                           | JJRE01038075.1 | +      | 185   | 276   |
| 9                                           | JJRE01038075.1 | +      | 3451  | 3547  |
| 10                                          | JJRE01038075.1 | +      | 3764  | 3823  |
| 11                                          | JJRE01038075.1 | +      | 4844  | 4974  |
| 12                                          | JJRE01038075.1 | +      | 5828  | 5942  |
| 13                                          | JJRE01038075.1 | +      | 6609  | 6848  |

#### 46. Great crested grebe (*Podiceps cristatus*)

>Podiceps\_cristatus No=46 length=1863 name="Great crested grebe"  
 ATGATGATGGCAGTGTCTGTTCTTTTCTTGAGAATCAAGGGTATGCTCTTCTCTTGTTCCTCCCATGCT  
 TCTGTTCTGGTCAGCCTGCACTTCCACAGCTGCGTTTCTCCGTCTTCTGGATCCTTCAAACATGGTCTA  
 CCTCCGCTGGGACCATGACGAACAGGAGCTGATGATGTTTGAGCTGCAGGTCCATACTGGTGGGTG  
 GCATTTGGATTGAGCCCTCACGGAGGGTTGCTGGATCTGACATTGTGATAGGAGGTGCTTCCCAAATG  
 GCACTATCTACTTCTCTGATTGTCATGTGGTAGATGAGGCAACCCTTGAAGAAGATGAGAGCCAGGACTA  
 CCAACTGCTGTGAGTAACAGAGAATGAGACCTCCACCACCGTGTGTTCAAACGCCACCTCCGGACATGT  
 GACCCGAATGACCTGGATATCACAATGGACACAGCAGACTCGTTACTGCATTTGGCACTGATGACACAG  
 TCCAATTCTTTAAAGGCCAAAGACTTTACAAAATCTCTTTTCTTGATGAGCTACAGAGGCCCATCTGACTC  
 AACTGACCCCAAAAATATTCTTACCTATGACCTGAGGCTGGACAACCTTTGCTGTTCCTGGTGAAGAAAC  
 AAGTATGCCTGTACTTTTATCCCACTGCCATGGTCAAGCAGAAAACACCATATCTACAAGTTGCAACCTG  
 TAATGACACCCCAACAACATAACCTTGGTTCATCATATCCTTGTATTGCTGTGGCAATGCCAGCGTGT  
 ACCCAGTGGCATAGATGATTGCTACGGAGCCAATCCAGATTTGCCCTGTGCTCTCAGGTTATTGTGGGC

TGGGCTGTTGGAGGAGAGTCTTACCAATTTCCAGATGAAGCTGCATTTTCTATTGGGACACCTTGGGACC  
 CTCAGTACGTCCGACTAGAAATCCATTACAGCAATCTCGACTTGTACCAGGCTTGACCGACAGCTCAGG  
 GGTACGAATCTACTATACGCCTGAGCTACGGAAATATGATGTAGGGTTCTGCAAACAGGCATCTTCACT  
 TCCCCTGTGCATTTTCATTCCTCCTGGAGCAGAATCCTACAGATCTTATGGCCTTTGCAATTCAGCCAGT  
 TTGATGAAATGAATGGGATGCTGGTTCCAGATCTGCATGTCTTTGCCTACTTGCTTCACACTCACCTGTC  
 TGGCAGAGGAGTGAAGCTGCTCAATACCGGAATGGTGAGCAGCTGGGCATCATCTGCGAGGACAATAAG  
 TACGACTTCAGACTGCAGGAGATTTCGGGACATGAAGGAAATCCTCATAATCAAACCAGGCGATGAGATCC  
 TGGTTCGAATGCAACTTTTCAGACACTGGATCGGGCAGAGATTACTTTTGGTGGGCCAAGCACCACGAATGA  
 GATGTGTTTACATTCCTCTTCTACTACCCTCGTAACAACATCTCCAGTTGTATGAGCTACCCTGACATC  
 TTGTATGTTGCACATGTACTCAAGCAGGAGGCTTCAGATGTAGTGGAAGGAATGATGGTAATGGACTTTG  
 TTGACTGGGACAATGAGACTGTCAAAATTCAGAGAAAAGCAGCCAAGGAGGCAGATCAAGTAGTCATGAT  
 TAAAACCATTAATGAACTCCAGAGAAATGAAAGTGGTCTAATCAGAGACATTAGTATTCAGAGAGGGCT  
 GCCTGTACAGTATTTCTGGACACCTCTCACTGTGAGTCTGAGGGCCACTGCAAACCTTCGTTTGACCG  
 GAGTATGGACTTCTGAGTCATCAGCTACCAAAGGAAATCCTTCACTTCTCTCCTTTCTCTCACACAGCT  
 GGTGTTTGCTTGGCTTGTCTTGGCCTCTGAGTATGGGAAGTGA

>Podiceps\_cristatus No=46 length=620 name="Great crested grebe"  
 MMMAVSVLFLRIKMLFLLFLPCFCSGQPALPQLRFSVFLDPSNMVYLRWDHDEQELMMFELQVHTTGWV  
 AFGFSPHGGLPGSDIVIGGVFNGTIYFSDCHVVDEATLEEDESQDYQLLSVTENETSTTVLFKRHLRTC  
 DPNDLDITMDTARLVTAFGTDDTVQFFKGQRLYKSLFLMSYRGPSTDPKIFFTYDLRLDNFAVPVEET  
 KYACTFIPLPMVKQKHIIYKFEVMTPHNITLVHHILVYACGNASVLPSTGIDDCYGANPDFALCSQVIVG  
 WAVGGESYQFPDEAAFSIGTPWDPQYVVRLEIHYSNLDLLPGLTDSSGVRIYYTPELRKYDVGVLQGTGIFT  
 SPVHFIPPGAESYRSYGLCNSSQFDEMNGMLVVDLHVFAVLLHHLHSGRGRVKAQYRNGEQLGIICEDNK  
 YDFRLQEIIRDMKEILIIKPGDEILVECNFQTLDRAEITFGGPSTTNEMCFITFLFYPRNNISSCMSYPDI  
 LYVAHVLRQVQVVEGMMVDFVDWNETVKIAEKAAKEADQVVMIKTINELQRNESGLIRDISIPERA  
 ACHSISGHLSLSGLRATANLRLTGVTSESSATKGNPSLPLLSLTQLVFAWLVLASEYVK

| Exon | NCBI Accession | Strand | Start | End   |
|------|----------------|--------|-------|-------|
| 1    | JMFS01078962.1 | +      | 5051  | 5347  |
| 2    | JMFS01078962.1 | +      | 8162  | 8308  |
| 3    | JMFS01078962.1 | +      | 10875 | 11036 |
| 4    | JMFS01078962.1 | +      | 12253 | 12336 |
| 5    | JMFS01078962.1 | +      | 13560 | 13727 |
| 6    | JMFS01078962.1 | +      | 14639 | 14741 |
| 7    | JMFS01078962.1 | +      | 15411 | 15577 |
| 8    | JMFS01057080.1 | -      | 9054  | 9145  |
| 9    | JMFS01057080.1 | -      | 5754  | 5850  |
| 10   | JMFS01057080.1 | -      | 5478  | 5537  |
| 11   | JMFS01057080.1 | -      | 4258  | 4388  |
| 12   | JMFS01057080.1 | -      | 3304  | 3418  |
| 13   | JMFS01057080.1 | -      | 2314  | 2553  |

#### 47. Rock pigeon (*Columba livia*)

| Exon | NCBI Accession | Strand | Start | End   |                                |
|------|----------------|--------|-------|-------|--------------------------------|
| 1    | AKCR01010579.1 | +      | 20544 | 20828 | 1 nonsense codon               |
| 2    | AKCR01010579.1 | +      | 24783 | 24928 | 1-nt deletion, splice donor CA |
| 3    | AKCR01010579.1 | +      | 26483 | 26644 | splice donor AT                |
| 4    | AKCR01010579.1 | +      | 27845 | 27928 | splice donor AT                |
| 5    | AKCR01010580.1 | +      | 189   | 356   |                                |

|    |                |   |      |      |                    |
|----|----------------|---|------|------|--------------------|
| 6  | AKCR01010580.1 | + | 1298 | 1400 |                    |
| 7  | AKCR01010580.1 | + | 2072 | 2238 |                    |
| 8  | AKCR01010581.1 | + | 611  | 682  | 20-nt deletion     |
| 9  | AKCR01010581.1 | + | 3030 | 3126 |                    |
| 10 | AKCR01010581.1 | + | 3342 | 3401 | splice acceptor TA |
| 11 | AKCR01010581.1 | + | 4491 | 4621 |                    |
| 12 | AKCR01010581.1 | + | 4910 | 5024 |                    |
| 13 | AKCR01010581.1 | + | 5760 | 5999 |                    |

#### 48. Yellow-throated sandgrouse (*Pterocles gutturalis*)

| Exon | NCBI Accession | Strand | Start | End   |                                 |
|------|----------------|--------|-------|-------|---------------------------------|
| 1    | JMFR01016479.1 | -      | 17680 | 17966 | 1-nt deletion, 1 nonsense codon |
| 2    | JMFR01016479.1 | -      | 14766 | 14912 |                                 |
| 3    |                |        |       |       | exon deletion                   |
| 4    | JMFR01016479.1 | -      | 12587 | 12670 |                                 |
| 5    | JMFR01016479.1 | -      | 11256 | 11424 | 1-nt insertion                  |
| 6    | JMFR01016479.1 | -      | 9948  | 10050 |                                 |
| 7    | JMFR01016479.1 | -      | 9058  | 9224  |                                 |
| 8    |                |        |       |       | exon deletion                   |
| 9    |                |        |       |       | exon deletion                   |
| 10   |                |        |       |       | exon deletion                   |
| 11   | JMFR01016479.1 | -      | 7185  | 7318  |                                 |
| 12   | JMFR01016479.1 | -      | 6779  | 6893  |                                 |
| 13   | JMFR01016479.1 | -      | 5843  | 6068  | 2-nt deletion                   |

#### 49. Brown mesite (*Mesitornis unicolor*)

| Exon | NCBI Accession | Strand | Start | End   |                              |
|------|----------------|--------|-------|-------|------------------------------|
| 1    | JJRI01040398.1 | -      | 16359 | 16611 | 5-nt deletion                |
| 2    |                |        |       |       | exon deletion                |
| 3    |                |        |       |       | exon deletion                |
| 4    | JJRI01040398.1 | -      | 12700 | 12783 | 1 nonsense codon             |
| 5    | JJRI01040398.1 | -      | 11358 | 11525 |                              |
| 6    | JJRI01040398.1 | -      | 10302 | 10395 | 1-nt deletion, 8-nt deletion |
| 7    | JJRI01040398.1 | -      | 9371  | 9537  | 1 nonsense codon             |
| 8    |                |        |       |       | exon deletion                |
| 9    | JJRI01040398.1 | -      | 6954  | 7050  | 1 nonsense codon             |
| 10   | JJRI01040398.1 | -      | 6679  | 6738  | splice acceptor CA           |
| 11   | JJRI01040398.1 | -      | 5529  | 5659  | splice donor AA              |
| 12   | JJRI01040398.1 | -      | 5156  | 5270  |                              |

## 50. Mallard (*Anas platyrhynchos*)

```
>Anas_platyrhynchos No=50 length=1851 name="Mallard"
ATGTCTGTTCTCTTCTCAAGAATAAGGGGCATGTTCTTCTCTTGTTCCTCACATGGTTTTGTTCTGGTC
AGCCTGCACCTCCACTCTTACGTTTCTCTGTCTACCTGGATCCTTTAAACATGGTATACCTTCGTTGGGA
CCATGATGAACAGGAGATGATGACTTTTGAGCTGCAGGTTACACAACAGGCTGGGTGGCGTTTGGATTCT
AGCCCTCATGGAGAGTTGCTGGATCTGACATTGTGATTGGAGGTGTCTTCTCTAATGGCAGCATCTACT
TCTCTGATTTTTCATGTGGTAGATGATGCAACCCCTTGAGGAAGATGATAGCCAGGACTACCAACTGCTGTC
AGTGACAGAGAATGAAACCTCCACCACCATGCTGTTCAAGCGCCACCTCCGGACATGTGACTCAAATGAC
CTGGATATCACAATGGACACAGCACGTCTCATTACTGCATTTGGCACTGATGACACAGTACAACCTTTTA
AGGGCCAAAAATTTCTAAGTCTCTTTTCTTGATGAGATACAGAAGTCCATCCAACCTTAAGTACCCTAA
AATATTCTTACCTATGACCTGAGGCTGGACAACCTTTGCTGTTTCTGTTGAAGAAACCAAATATGCCTGT
ACCTTTCTTCCACTGCCAGGTTAAGCAGAAACACCACATCTACAAGTTTGGCCCTGTAATAACTCCCC
ACAACATAACTTTAGTTCAATCATATTCTGGTTTACGCCTGTGGCAATGCCAGTGTGTTACCAAGTGGCAT
AGATGACTGCTATGGAGCCAATCCAGATTTTGCCTGTGCTCTCAGGTGGTTGTGGGCTGGGCTGTTGGA
GGAGAGTCTTATCAATTTCCAGATGATGCTGCATATTCCATCGGAACACCTTGGGACCTCAGTATGTCC
GACTGGAAATCCATTACAGCAATTTTGACTTGGTATCAGGTTTGGATCGACAGCTCAGGGGTACGAATATA
CTATACACCAGAGGTACGAAAGTATGATGTGGGGATACTGCAAAACAGGCATCTTACCTTCCCTGTGCAT
TTCATTCTCCTGGAGCAGAATCCTACAGATCTTATGGCCTTTGCAATTCAGCCAGTTTGTGAAATGA
ATGGGACACCAGTTCAGATCTGCACGTCTTGCCTACTTGCCTCACACTCATCTGGCTGGCAGAGGAGT
GAAGGTTGCCAGTACAGGAATGAAAAACAGCTGGGGATCATCTGTGAGGACAACAAGTATGACTTCACC
TTGCAGGAGATTCGGGACATGAAGGAAATCCTTGTAATCAAACCAGGGGATGAGATCCTGGTCAATGTA
ACTTTCAGACACTGGATCGGTCAGGGATTACTTTTGTGTTGGCCAAGCACCATGAATGAGATGTGTCTCTC
ATTCTCTTCTACTACCCTCGTAACAACATCTCCAGCTGTATGGGCTACCCTGACATTTTGTATGTTGCG
CATGTAACAAGCAGGAGGCTCAGATGCAGTGGAAAGGAATGATGGCCATGGACTTTGTTGACTGGAACA
ACGAAACTGTCAAAACTGCAGAGAAAGCAGCCAAGGAGGCAGATCAAAATAGTTGTGATTTAAACCATTA
TGAAATCCAGAAAAATGAGAGTGGTCTCATCAGAGACATTCATATTCCAGAGCGGGCTGTCTGTACAAT
GTTTCTGTACAACAGACACTGTGAGATCTGAGAGCTACTGCAAACTTCGTTTACCAGCAGTACACAATT
TTGAATCCTCAACCACAAAGAATTTGTTTCACTTCTCTTCTTTTCTCACACAGCTGTTGTTTGGCTTG
GATTATTTTTTCTCTGAGTATAGGAAGTGA
```

```
>Anas_platyrhynchos No=50 length=616 name="Mallard"
MSVLFSTRIRGMFFLLFLTWFCSGQPAPPLLRFSVYLDPLNMVYLRWDHDEQEMMTFELQVHTTGWVAFGF
SPHGELPGSDIVIGGVFSNGSIYFSDHFVDDATLEEDDSQDYQLLSVTENETSTTMLFKRHLRTRCDSND
LDITMDTARLITAFGTDDTVQLFKGQKFSKSLFLMRYRSPSNLTDPKIFFTYDLRLDNFVAVPEETKYAC
TFLPLPRVKQKHIIYKFEFVITPHNITLVHHILVYACGNASVLPISGIDDCYGANPDFALCSQVVVWVAVG
GESYQFPDDAAYSIGTPWDPQYVRLIHYNSFDLVSLIDSSGVRIYYTPEVRKYDVGILQGTGIFTFPVH
FIPPGAESYRSYGLCNSSQFDEMNGTPVPDLHVFAVLLHHTLAGRQVQYRNEKQLGIICEDNKYDFT
LQEI RDMKEILVIKPGDEILVECNFQTLDRSGITFAGPSTMNEMCLSFVYPRNNISSCMGYPDILYVA
HVLKQEAASDAVEGMMAMDFVDWNNETVKTAEKAAKEADQIVVIKTINEIQKNESGLIRDIHIPERAVCHN
VSVQQTLSDLRATANLRLTAVHNFESSTTKEFVSLPLFLTLQLLFAWIIFSSEYRK
```

| Exon | NCBI Accession | Strand | Start   | End     |
|------|----------------|--------|---------|---------|
| 1    | NW_004676532.1 | +      | 1591828 | 1592112 |
| 2    | NW_004676532.1 | +      | 1594523 | 1594669 |
| 3    | NW_004676532.1 | +      | 1595616 | 1595777 |
| 4    | NW_004676532.1 | +      | 1596280 | 1596363 |
| 5    | NW_004676532.1 | +      | 1597559 | 1597726 |
| 6    | NW_004676532.1 | +      | 1598701 | 1598803 |
| 7    | NW_004676532.1 | +      | 1599136 | 1599302 |
| 8    | NW_004676532.1 | +      | 1601044 | 1601135 |



|    |                |   |         |         |
|----|----------------|---|---------|---------|
| 9  | NW_004676532.1 | + | 1603475 | 1603571 |
| 10 | NW_004676532.1 | + | 1603765 | 1603824 |
| 11 | NW_004676532.1 | + | 1604680 | 1604810 |
| 12 | NW_004676532.1 | + | 1605060 | 1605174 |
| 13 | NW_004676532.1 | + | 1605889 | 1606128 |

---

## 51. Northern bobwhite (*Colinus virginianus*)

gene deletion

---

## 52. Japanese quail (*Coturnix japonica*)

gene deletion

---

## 53. Chicken (*Gallus gallus*)

gene deletion

---

## 54. Wild turkey (*Meleagris gallopavo*)

gene deletion

---

## 55. Black grouse (*Tetrao (Lyrurus) tetrix tetrix*)

gene deletion

---

## 56. White-throated tinamou (*Tinamus guttatus*)

```
>Tinamus_guttatus No=56 length=1851 name="White-throated tinamou"
ATGTTAGTAGATCTTTTCACAAGAATCAAGGGTATGCTCCTCTTCTTGTTTCATTCCATGCCTTTGTTCTG
GTCAGGCCACACCTGCATTGTTGCGTTTTTCCAGCTTTTTGGATCCTTCCAACATAGTCCACCTCCGCTG
GGACCACAATGAACAGGAGATGATAACTTTTGAGCTGCAGGTCCGTGCACCTGGCTGGGTGGCATTGTTGGG
TTCAGCCCGCATGGAGAGTTACCTGGATCTGACATTGTAATCGGAGGTGTCTTCCCAAATGGCAGCATAT
ATTTCTCTGATTGTTCATGTTGTAGATGAGGCAACTGTTGACGCAGATGAGAGCCAGGACTACCAACTGCT
GTCACTGGCGCAGGATGAGACTTTTACTACCATGATGTTCAAACGCCACCTCCTTACATGTGACCTGAAT
GACCTAGATATCACAATGGATACAGCACACCTCATTACAGCATTTGGCACTGATGACACGGTCCAATTCT
CTAAAGGCCAAAAATTTTCCAAATCTTTTTCTTTGATGAAGTACAGAGGGTCATCTGACTCAGCTGACCC
CAAAATATTCTTTCACATATGACCTGAGACTGGACAATTTTCGCTGTTCCAGCTGAAGAACTAAGTATGCC
TGTACCTTTTATACCACTGCCTATGGTCAAGCAGAAAACATCACATCTATAAGTTTGAACCTGTATTAACAC
CCCACAACATAACTTTGGTTCATCACATCCTGGTTTATGCCTGTGGCAGTGACAGTGTAAATACCCAGTGG
CATAGATGATTGCTATGGAGTTGATCCAGATTTTGCCTGTGCTCTCAGGTGCTTGTGGGCTGGGCTGTT
GGGGGAGAGTCTATCGATTTCCAGATGAACTGCACCTCCATAGGGACACCGTTGGATCCTCAGTACA
TCCGACTGGAAATCCACTACAGCAATTTGACTTGTACCAGGGTTGATCGACAGCTCAGGGGTGCGAAT
```

CTACTACACATCGGAGCTGCGGAAATATGATGCGGGGGTTCTGCAGACAGGCATCTTCACTTTTTCCTGTA  
 CATTTCATCCCTCCTGGAGCAGAATCCTATAGATCTTATGGCCTTTGCAATACTAGCCAGTTTGTATGAAG  
 TGAATGGGACACCAGTTCCAGAGTTGCACGTATTTGCATACCTTCTTACACACACCTGTCTGGTAGAGG  
 AGTGAAAGTAGCCCAGTACCAGGAAATGGTGGAGCAGCTGCGCATCATCTGTGAGGACAATAAGTATGATTTT  
 AACTGCAGGAGGTTTCGGGATATGAAGAAAATCCTCACAATCAAACCAGGGGATGAGATCCTGGTGGAAAT  
 GTAGCTTTTCAGACACTGGATCGGTGAGTGAATTTTGGTGGGCTAAGTACCATGAATGAGATGTGCCT  
 CACGTTCTCTTCTACTATCCTCGTAACAACATCTCCAGTTGTATGGGCTACCCTGACATTTCTATATATT  
 GCCACATGCTCAAGCAGGAGGCTCGGATACAGTAGAAGGAATGATGGCCATGGACTTTTATTGACTGGG  
 ACAATGAGACCATCAAACTGCAGAGAAAGCAGCCAAGGAGGCAAAATCAAGTAGTTGTGATTAACAAT  
 TAATGAAGTGCAGAAAATCGGGAGTGGCCTAATCAGAGACATGATTAATCCAGAGCGGGCTGTCTGTCAC  
 AGTATTTTCAGAAAATATCTCACTGTCACTGAAGGCTGCCACGAACTTAATTTTGTGCACTGCTCAGGT  
 CTGAGTCATCGACTACCAAAGAGATGGCTTCACTTCTCTTCTTTTTCACACAGATACTATTTGCTTG  
 TCTTCTTTTGTATCTGAGCTTAGAATGTAA

>Tinamus\_guttatus No=56 length=616 name="White-throated tinamou"  
 MLVDLFTRIKMLLFLFIPCLCSGQATPALLRFSSFLDPSNIVHLRWDHNEQEMITFELQVRAPGWVAFG  
 FSPHGELPGSDIVIGGVFPNGSIYFSDCHVVDDEATVDADESQDYQLLSLAQDETFMTMMFKRHLLTCDLN  
 DLDITMDTAHLITAFGTDDTVQFSKGQKFSKSLFLMKYRGSSSDSADPKIFFTYDLRLDNFAVPAEETKYA  
 CTFIPLPMVKQKHIIYKFEPVLTPHNITLVHHILVYACGSDSVIPSGIDDCYGVDPDFALCSQVLVWVAV  
 GGESYRFPDETALSIGTPLDPQYIRLEIHYSNFDLLPGLIDSSGVRIYYTSELRKYDAGVLQGTGIFTFPV  
 HFIPPGAESYRSYGLCNTSQFDEVNGTVPPELHVFAVLLHHLTHLSGRGVKVAQYRNGEQLRIICEDNKYDF  
 TLQEVDRDMKKILTIPKPGDEILVECSFQTLDRSVITFGLSTMNEMCLTFLFYPRNNISSCMGYPDILYI  
 AHMLKQEASDTVEGMMAMDFIDWDNETIKTAEKAAKEANQVVVIKTINELQKIGSGLIRDMINPERAVCH  
 SISENISLSLKAATNLNFAAVLRSESTTKEMASLPLLSFTQILFACLLLSSELRM

| Exon | NCBI Accession | Strand | Start | End   |
|------|----------------|--------|-------|-------|
| 1    | JMFW02052843.1 | +      | 44990 | 45277 |
| 2    | JMFW02052843.1 | +      | 48249 | 48395 |
| 3    | JMFW02052843.1 | +      | 49878 | 50039 |
| 4    | JMFW02052843.1 | +      | 51353 | 51436 |
| 5    | JMFW02052843.1 | +      | 52568 | 52735 |
| 6    | JMFW02052843.1 | +      | 53259 | 53361 |
| 7    | JMFW02052843.1 | +      | 54442 | 54608 |
| 8    | JMFW02052843.1 | +      | 55880 | 55971 |
| 9    | JMFW02052843.1 | +      | 59767 | 59863 |
| 10   | JMFW02052843.1 | +      | 60072 | 60131 |
| 11   | JMFW02052843.1 | +      | 60990 | 61120 |
| 12   | JMFW02052843.1 | +      | 61409 | 61523 |
| 13   | JMFW02052843.1 | +      | 62171 | 62407 |

## 57. African ostrich (*Struthio camelus australis*)

>Struthio\_camelus\_australis No=57 length=1833 name="African ostrich"  
 ATGGTGGTGTATTCTGTTCTCAAGGATCAAAGATATGCTCCTACTCTTGTTCATCCCATGCCTTTGTTCTG  
 GTCAGTCTGCACCTCCATTGCTGCGTTTCTCCAGCTTCCTGGATCCTTCTAACATGGTCTACCTCCGCTG  
 GGACCACAATGAACAGGAGTTGATGACCTTTGAGCTGCAGGTCCCTCACGACTGGCTGGGTGGCATTGGG  
 TTCAGCCCTCATGGAAAGTTGCCTGGATCTGACATTTGTGATGGGAGGCATATTTCTAATGGCAGCATCT  
 ATTTCTCTGATTGTCATGTTGTAGATGAGGCAACCTTTGAGGAAGACGAGAGCCAAGACTACCAACTGCT  
 GTCACTGACAGAGGATGAGACCTTCACTACTATGCTGTTCAAACGCCACCTCCGGACATGTGACCCAAAT  
 GACCTGGATATCACAATGGACACAGCACACCTCATTACTGCATTTGGCACTGCTGACACAGTCCAATTCT  
 TTAAAGGCCAAAGGTTTTCAAATCTCTTTTCTTGATGAGGTACAGAGGCACATCTGACTCAACTGACCC

CAAAATATTCTTCACTTATGACATGGGGCTGTACAATTTTGTGTTCCAGCTGAAGAAACGAAGTATGCC  
 TGTACCTTTTATCCCCTGCCCATGGTCAAACAGAAACACCACATCTACAAGTTTGAACCTGTAATAACAC  
 CCCACAACATAACTTTGGTTCATCACATTCTGGTTTATGCCTGTGGCAATGCCAATGTGTTACCCAGTGG  
 CATAAATGACTGCTACGGAGCTGATCCAGATTTTGCCTGTGCTCTCAGGTGCTTATGGGCTGGGCTGTT  
 GGGGGAGAGTCCATCAATTTCCAGATGAAGCTGCGATCTCCATAGGGACATCTTTGGACCCCTCAGTACA  
 TCCGACTGGAAATCCACTACAGCAATTTTGACTTGTACCAGGTTTGTATCGACAGCTCAGGGGTACGAAT  
 CTACTACACACCAGAGCTACGAAAATATGATATGGGGATTCTGCAAACAGGCATCCTCACTTTCCCTGTA  
 CATTTCATCCCTCCTGGAGCAGAAACCTACAGATCTTACGGCCTTTGCAATACTAGCCAGTTTGTATGAAA  
 TGAACGGGACACCAGTTACAGAGCTGCATGTGTTTGCCTACCTGCTTACACCCACCTGTCTGGCAGAGG  
 AGTGAAGTTGCCCAATACCGGAATGGTGTAGCAGCTGGGGATCATCTGTGAGGACAATAAGTATGATTTT  
 ACATTGCAGGAGATTCCGGACACGAAGGAAATCGTCACAATCAAACCAGGGGATGAGATCCTGGTGGAAT  
 GTAGCTTTTCAGACACTGGATCGGTTCAGGGATTACTTTTCGGTGGGCCAAGCACCATGAATGAGATGTGCCT  
 CACATTCCTCTTCTACTACCTCGTAACAACATCTCCAGTTGCATGGGCTACCTGACATTTTATATAT  
 GCACACATACTGAAGCAGGAGGCTCAGATACAGTGAAGGAATGATGGCCATGGACTTTGTTGACTGGG  
 ACAACGAGACCATCAAAATTGCAGAGAAAGCAACCAAGGAGGCAGATCAAGTAGTCATGATTAACAAT  
 TAATGAACAGCAGAAAAATGAGACAGGTCTAATCAGAGACATAATTATTCAGAGCGGGCTGCCGTGCAC  
 AATATTTCTGAAAACCTCTCATTGTGAGGTCTGAGGGCTGCCACAAATCTTCGTTTGGCTGCAGTGTGTA  
 GGTCTGAGTCATCAACCACAAAGAAATGTCTTCACTTCTCTTCTTCTCTCACACAGCTGGTATTTGC  
 TTGGCTTATCTAG

>Struthio\_camelus\_australis No=57 length=610 name="African ostrich"  
 MVVILFSRIKDMLLLLFIPCLCSGQSAPPLLRFSFLDPSNMVYLRWDHNEQELMTFELQVLTGWVAFG  
 FSPHGKLPGSDIVMGGIFPNSIYFSDCHVVDDEATLEEDSQDYQLLSLTFEDETFTTMLFKRHLRTCDPN  
 DLDITMDTAHLITAFGTADTVQFFKQRFSSKSLFLMRYRGTSDSTDPKIFFTYDMGLYNFAVPAEETKYA  
 CTFIPLPMVKQKHIIYKFEPVITPHNITLVHIIHLYACGNANVLPSPGINDCYGADPDFALCSQVLMGWAV  
 GGESYQFPDEAAISIGTSLDPQYIRLEIHYNSFDLLPGLIDSSGVRIYYTPELRKYDMGILQGTGILTFPV  
 HFIPPGAETYRSYGLCNTSQFDEMNGTPVTELHVFAVLLHTHLSGRGVKVAQYRNGEQLGIICEDNKYDF  
 TLQEIIRDTEIVTIKPGDEILVECSFQTLDRSGITFGGPSTMNEMCLTFLFYPRNNISSCMGYPDILYI  
 AHILKQEASDTVEGMMAMDFVDWNETIKIAEKATKEADQVVMIKTINEQQKNETGLIRDIIIPERAACH  
 NISENLSLSGLRAATNLRLLAAVCRSESSSTTKEMSSLPPLLSLTQLVFAWLI

| Exon | NCBI Accession | Strand | Start | End   |
|------|----------------|--------|-------|-------|
| 1    | JJRT01038259.1 | -      | 1996  | 2283  |
| 2    | JJRT01038258.1 | -      | 4444  | 4590  |
| 3    | JJRT01038258.1 | -      | 2725  | 2886  |
| 4    | JJRT01038258.1 | -      | 1291  | 1374  |
| 5    | JJRT01038257.1 | -      | 39243 | 39410 |
| 6    | JJRT01038257.1 | -      | 38417 | 38519 |
| 7    | JJRT01038257.1 | -      | 37163 | 37329 |
| 8    | JJRT01038257.1 | -      | 35268 | 35359 |
| 9    | JJRT01038257.1 | -      | 30763 | 30859 |
| 10   | JJRT01038257.1 | -      | 30487 | 30546 |
| 11   | JJRT01038257.1 | -      | 29354 | 29484 |
| 12   | JJRT01038257.1 | -      | 28956 | 29070 |
| 13   | JJRT01038257.1 | -      | 27998 | 28216 |

---
