# Supplementary material for: MOXD2, a Gene Possibly Associated with Olfaction, Is Frequently Inactivated in Birds
Source: PubMed Central journal article supplement (PMC4830563; doi:10.1371/journal.pone.0152431), 2016-04-13
Supplement: pone.0152431.s003.pdf [file pone.0152431.s003.pdf]

### S3 Fig. Alignment of selected exons with point mutations

- Open reading frame disrupting mutations are marked on red background
- Start codon (ATG), splice donor (gt), and splice acceptor (ag) sequences are on yellow background
- Exon sequences are in uppercase letters
- Amino acid sequence of the rifleman MOXD2 protein is shown at the top

#### A. Multiple alignment of exon 1 sequences from 11 birds

|                               |                                                               |                                         |     |
|-------------------------------|---------------------------------------------------------------|-----------------------------------------|-----|
| 1 Rifleman (aa)               |                                                               | M M A I V F S R I K R                   |     |
| 1 Rifleman                    | gactcaggaattgcagtggtgctggtg                                   | ATGATGGCAATTGTCTTCTCGAGAATCAAGAGG       | 60  |
| 2 Golden-collared manakin     | gactcagaaattgaagtggtactgttggtg                                | ATGATGGCAATTGTCTTCTCAAGAATCCAGGGT       | 60  |
| 3 American crow               | gactcagaaactgcag-----tg                                       | ATGATGGTGATGCTCTTCTCAGGGATCAAGAGA       | 51  |
| 4 Hooded crow                 | gacacagaaactgcag-----tg                                       | ATGATGGTGATGCTCTTCTCAGGGATCAAGAGA       | 51  |
| 5 Ground tit                  | gtaccagagactgcag-----ag                                       | ATGATAGTGATGTTCTTTTCAGGAATCAAGAGA       | 51  |
| 6 Collared flycatcher         | gactcagagactgcag-----ag                                       | ATGATGGTTTTGTCTTCTCAGGAATCAAGAAA        | 51  |
| 7 Zebra finch                 | gactcagagactgcag-----ag                                       | ATGATGGTGATC---TTTTTCAGGAATCAAGAGA      | 48  |
| 8 Atlantic canary             | gactcagagactgcag-----ag                                       | ATGATGGTGATGTTCTACTCAGGAATCAAGAGA       | 51  |
| 9 Medium ground finch         | gactcagagactgcag-----ag                                       | ATGATGGTGATGTTCTTCCAGGAATCAAGAGA        | 50  |
| 10 White-throated sparrow     | gactcagagactgcag-----ag                                       | ATGATGGTGATGTTCTTCCAGGAATCAAGAGA        | 51  |
| 47 Rock pigeon                | gactccgaaattgcagtggtcctggtgata                                | ATGATGGCAATTGTCTTCTCAAGTATCAAGGGT       | 60  |
| 48 Yellow-throated sandgrouse | gactcagaaactgcagtggtcctggtg                                   | ATGATGGCAATTGTCTTCTCAAGAATCAAGGGT       | 60  |
|                               | * * * * *                                                     | * * * * *                               |     |
|                               |                                                               |                                         |     |
| 1 Rifleman (aa)               |                                                               | M F F L L F F P C F C S G Q L A P P P L |     |
| 1 Rifleman                    | ATGTTCTTCCTCTGTTCTTCCCATGCTTTTGTCTGGTCAGCTTGCACCTCCACCCTGCTG  |                                         | 120 |
| 2 Golden-collared manakin     | ATGCTCTTCCTCTGTTCTTCCCATGCTTTTGTCTGGTCAGCTTGCACCTCCACTACTG    | -----GGTCAGCTTGCACCTCCACTACTG           | 103 |
| 3 American crow               | ATGCTCTTCCTCTGTTCTTCCCATGCTTTTGTCTGGCCAGCTTGCACCTCCACTGCTG    |                                         | 111 |
| 4 Hooded crow                 | ATGCTCTTCCTCTGTTCTTCCCATGCTTTTGTCTGGCCAGCTTGCACCTCCACTGCTG    |                                         | 111 |
| 5 Ground tit                  | ATGCTCTTCCTCTGTTCTTCCCATGCTTTTGTCTGGCCAGCTTGCATCTCTGCTGCTG    |                                         | 111 |
| 6 Collared flycatcher         | ATGCTCTTCCTCTGTTCTTCCCATGCTTTTGTCTGGCCAGCTTGCATCTCCCTGCTG     |                                         | 111 |
| 7 Zebra finch                 | ATGCTCTTCCTCTGTTCTTCCCATGCTTTTGTCTGGCCAGCTTGCATCTCCACTGCTG    |                                         | 105 |
| 8 Atlantic canary             | CTGCTCTTCCTCTTTTCCCTCCCATGCTTTTGTCTGGCCAGCTTGCATTTCCACTGCCG   |                                         | 111 |
| 9 Medium ground finch         | ATGCTCTTCCTCTGTTCTTCCCATGCTTTTGTCTGGCCAGCTTGCATCTCCTCTGATG    |                                         | 110 |
| 10 White-throated sparrow     | ATGCTCTTCCTCTGTTCTTCCCATGCTTTTGTCTGGCCAGCTTGCATTTCCACTGCTG    |                                         | 111 |
| 47 Rock pigeon                | ATGCTCTTCCTCTGTTCTTCCCATGCTTTTGTCTGGCCAGCTTGCACCTCCACTGCTG    |                                         | 120 |
| 48 Yellow-throated sandgrouse | ATGCTCTTCCTCTTTTCCCATGCTTTTATTATGATCAGCTTGCACCTCCACTGCTG      | -----DAGCTG                             | 119 |
|                               | ** ***** * **                                                 | * * * * * * *                           |     |
|                               |                                                               |                                         |     |
| 1 Rifleman (aa)               |                                                               | R F S T F L D P S N M V Y L H W D H D D |     |
| 1 Rifleman                    | CGTTTCTCCACTTTCTGGATCCTTCCAACATGGTCTACCTCCACTGGGACCATGATGAT   |                                         | 180 |
| 2 Golden-collared manakin     | CATTTCTCCACCTCCCTGGATCCTTCCAACACAATCCACTCCGCTGGGACCATGATGAA   |                                         | 163 |
| 3 American crow               | CGTTTCCCACCTTATTGGATCCTTCCAGCATGTTCTACCTCCACTGGGACCACGAGGAA   |                                         | 171 |
| 4 Hooded crow                 | CGTTTCCCACCTTATTGGATCCTTCCAGCATGTTCTACCTCCACTGGGACCACGAGGAA   |                                         | 171 |
| 5 Ground tit                  | AGTTTCCCACCTTCTGGATCCTTCCAGCATGTTCTACCTCCGCTGGCACTATAAGGAA    |                                         | 171 |
| 6 Collared flycatcher         | CGTTTCCCACCTTCTGGATCCTTCCAGCATGTTCTACCTCTGCTGGGACCACAGGAA     |                                         | 171 |
| 7 Zebra finch                 | CGTTTCTCCACTTCTGGATCCTTCTAGCATGTTCCACCTCTGCTGGGACCATGAGGAA    |                                         | 165 |
| 8 Atlantic canary             | CGTTTCCCACCTTCTGGATCCTTCCAGCATGTTCTACCTCTGCTGGGACCACGAGGAA    |                                         | 171 |
| 9 Medium ground finch         | CTTTTCCCACCTTCTGGATCCTTCCAGCATGTTCTACCTCTGCTGGGAGCACAGGAA     |                                         | 170 |
| 10 White-throated sparrow     | CATTTCCCTGCCTTCTGGATCCTTCCAGCATGTTCTGCCTC-----TGAGGAA         |                                         | 160 |
| 47 Rock pigeon                | CATTTCTCCATCTTCTGGAGCCTACAATCATGGTTTACCTCTGCTGAGACCATGACGAA   |                                         | 180 |
| 48 Yellow-throated sandgrouse | CGTTTCTCCATCTTCTGGATCCTTCAACATGGTCTACCTCCGCTGGGACCATGACGAA    |                                         | 179 |
|                               | **** * * ***** * * * * *                                      | * * * * * * *                           |     |
|                               |                                                               |                                         |     |
| 1 Rifleman (aa)               |                                                               | Q E L M T F E L Q V H T T G W V A F G F |     |
| 1 Rifleman                    | CAGGAGCTGATGACATTTGAGCTGCAGGTCCATACAACCTGGCTGGGTGGCA-TTTGGATT |                                         | 239 |
| 2 Golden-collared manakin     | CAGGAGCTGATGACATTTGAGCTGCAGGTCCATACAACCTGGCTGGGTGGCA-TTTGGATT |                                         | 222 |
| 3 American crow               | CAGGAGCTGATGAGGTTGAGCTGCACATCCACACAACCTGGCTGGATGGCA-TCTGGATT  |                                         | 229 |
| 4 Hooded crow                 | CAGGAGCTGATGAGGTTGAGCTGCACATCCACACAACCTGGCTGGATGGCA-TCTGGATT  |                                         | 229 |
| 5 Ground tit                  | CAGGAGCTGATGGGGTTGAGCTGCACATCCACACAATGGCTGGGTGGCA-CATGGA--    |                                         | 228 |
| 6 Collared flycatcher         | CAGGAGCTGATGGGGTTGAGCTGCACATCCACACAACCTGGCTGGGTGGCA-TCTGGATT  |                                         | 229 |
| 7 Zebra finch                 | CAGGAGCTGATGGGGTTGAGCTGCACATCCAC---GCTGCCTCATCCACA-TGTAGATT   |                                         | 221 |
| 8 Atlantic canary             | CAGGACCTGATGGGGTTGAGCTGCACATCCAC---ACGGGCTGGGTGGCA-CGTGGATT   |                                         | 226 |
| 9 Medium ground finch         | CAGGAGCTGATGGGGTTGAGCTGCACATCCAC---ACTGGGTGGATGGCA-TGTGGATT   |                                         | 225 |
| 10 White-throated sparrow     | CAGGAGCTGATGGGGCTGAGCTGCACATCCAC---ACTGGGTGGGTGGCA-TGTGGATT   |                                         | 215 |
| 47 Rock pigeon                | CAGGAGGTGATGACATTTGAGCCGAAGTCCATACAACCTGGCTGGGTGGCA-TTTGGATT  |                                         | 239 |
| 48 Yellow-throated sandgrouse | CAGGAGCTGATGAAGTTTGGAGCTGCAGGTCCATACGACTGGCTGGGTGGCA-TTTGGATT |                                         | 238 |
|                               | ***** ***** ***** * * * * *                                   | * * * * * * *                           |     |

|                               |                                                                 |     |
|-------------------------------|-----------------------------------------------------------------|-----|
| 1 Rifleman (aa)               | S P H G E L P G S D I V I G G V F P N G                         |     |
| 1 Rifleman                    | CAGCCCTCATGGAGAGTTGCCCTGGATCTGACATTGTGATAGGAGGTGTCTTCCCAATGG    | 299 |
| 2 Golden-collared manakin     | CAGCCCTCATGGAGAGTTGCCCTGGATCTGACATTGTGACAGGAGGTGTCTTCCCAATGG    | 282 |
| 3 American crow               | CAGCCCTCATGGAGAGTTGCCCTGGATATAACATTGTGACAGGAGGTGCCTCCCCAATGG    | 289 |
| 4 Hooded crow                 | CAGCCCTCATGGAGAGTTGCCCTGGATATGACATTGTGACAGGAGGTGCCTCCCCAATGG    | 289 |
| 5 Ground tit                  | GAGCCCTCATGGAGAGTTGCCCTGGATCTGACACTGTGTGACAGGAGGTGCCTACCGGAGTGG | 287 |
| 6 Collared flycatcher         | CAGCCCTCATGGAGAGTTGCCCTGGATCTGACGTTGTGACAAGAGGTGCCTTCCCAAAGGG   | 289 |
| 7 Zebra finch                 | CAGCTATCATGGAGAGTTGCCCTGGATCTGACATTGTGACAGGAGGTGCTTTCGAAATGG    | 281 |
| 8 Atlantic canary             | CAGCCCTCACAGAAAGCTGCCCTGGATCTGACATTGTGACAGGAGGTGTCTTCCGAAATGG   | 286 |
| 9 Medium ground finch         | CAGCCCTCATGGAGAGTTGCCCTGGATCTGACATTGTGACAGGAGGTGCCTTCCGAAATGG   | 285 |
| 10 White-throated sparrow     | CAGCCCTCATGGAGAGTTGCCCTGGATCTGACATTGTGCCAGGAGGTGCCTTCCGAAATGG   | 275 |
| 47 Rock pigeon                | CAGCCCTCATGGAGAGTTGCCCTGGATCTGACATTGTGATAGGAAGTATCTTCCCAATGG    | 299 |
| 48 Yellow-throated sandgrouse | CAGCCCTCACGGAGAATTGCCCTGGATCTGATACTGTGATAGGAGGTGTCTTCCCAATAG    | 298 |

\* \* \* \* \*   \* \* \*   \* \* \*   \* \* \*   \* \* \*   \* \* \*   \* \* \*   \* \* \*   \* \* \*

|                               |                                                       |     |
|-------------------------------|-------------------------------------------------------|-----|
| 1 Rifleman (aa)               | S I Y F S                                             |     |
| 1 Rifleman                    | CAGCATCTACTTCTCTGTAAAGTTGAAAATACTTCTCCTCCTCATCCCC     | 345 |
| 2 Golden-collared manakin     | CAGCATCTACTTCTCTGTAAAGTTGAAAAGACTTCTCCTCCTCAGGCTC     | 328 |
| 3 American crow               | CAGCATCTACTTCTCTGTAAAGTTGAAACAGATTCTCCTCCTCCTCATCCCC  | 335 |
| 4 Hooded crow                 | CAGCATCTACTTCTCTGTAAAGTTGAAACAGATTCTCCTCCTCCTCATCCCC  | 335 |
| 5 Ground tit                  | CAGTTCTGCTTCCCTGTAAAGTTGAAACAGATTCTCCTCCTCCTCAACCC    | 333 |
| 6 Collared flycatcher         | CAGCATCTGCTTCTCTGTAAAGTTGAAACAGGTTTCTCCTCCTCGTCCCA    | 335 |
| 7 Zebra finch                 | CAGCATCTGCATCTCTGTAAAGTTGAAACAGATATCTCCTCCTCCTCATCTC  | 327 |
| 8 Atlantic canary             | CGGCATCTGCTTCTCTGTAAAGTTGAAACAGATAGTTCTCCTCCTCATCTCC  | 332 |
| 9 Medium ground finch         | CAGCATCTGCTTCTCTGTAAAGTTGAAACAGATTCTCCTCCTCCTCAACCC   | 331 |
| 10 White-throated sparrow     | CAGCATCTGCTTCTCCTGTAAAGTTGAAACAGATTCTCCTCCTCCTCATCCCC | 321 |
| 47 Rock pigeon                | CAGCATCTACTTCTCCTGTAAAGTTGAAAAGACTTCTCCTCCTCCTCCT     | 345 |
| 48 Yellow-throated sandgrouse | CAGCATCTACTTCTCCTGTAAAGTTGAAAACACTTCTCCTCCTCCTCCTCCT  | 344 |

\* \* \* \* \*   \* \* \*   \* \* \*   \* \* \*   \* \* \*   \* \* \*   \* \* \*   \* \* \*

### B. Multiple alignment of exon 3 sequences from 3 birds

|                 |                                                             |    |
|-----------------|-------------------------------------------------------------|----|
| 1 Rifleman (aa) | M D T A H L V A A F                                         |    |
| 1 Rifleman      | agatttggccagtgaaacacttccatttcAGTGACACAGCCCATCTTGTTGCTGCATTT | 60 |
| 35 Crested ibis | agactttccaatgaaacactcccattacAGTGACACAGCATGCCCTGTACTGCCTTT   | 60 |
| 36 Little egret | agagtttccagtg-aatgtttccatttcAGTGATACAGCACACTTCATTACTGCCTTT  | 59 |

\* \* \* \* \*   \* \* \* \* \*   \* \* \* \* \*   \* \* \* \* \*   \* \* \* \* \*

  

|                 |                                                             |     |
|-----------------|-------------------------------------------------------------|-----|
| 1 Rifleman (aa) | G T D D T V Q F F K S Q R F S R S L F L                     |     |
| 1 Rifleman      | GGCACTGATGACACAGTCCAATTCTTTAAAGCCAAAGATTTTCCAGATCT-CTTTTCTT | 119 |
| 35 Crested ibis | TGTGCTGATGACACAGTCCAATTCTTTAAAGCCAAAGATTTTCCAAAGTCTTTTTTCTT | 120 |
| 36 Little egret | GGTACTTATGACACAGTCAATTCTTTAAAGCCAAAGATTTTCTAAATGT-CTTTTCTT  | 118 |

\* \* \* \* \*   \* \* \* \* \*   \* \* \* \* \*   \* \* \* \* \*   \* \* \* \* \*

  

|                 |                                                           |     |
|-----------------|-----------------------------------------------------------|-----|
| 1 Rifleman (aa) | M R Y K S P S D S T D P K V F F T Y D L                   |     |
| 1 Rifleman      | GATGAGGTACAAAAGCCCATCTGACTCAACTGACCCCAAAGTATTCACCTATGACCT | 179 |
| 35 Crested ibis | GATGAGGTACAGAGGCCCATCTGACTCAACTGACCCCAAATATTCACCTATGACCT  | 180 |
| 36 Little egret | GATGAGGTACAGAGGCCCATCTGACCCAAAGTATTCACCTATGACCT           | 178 |

\* \* \* \* \*   \* \* \* \* \*   \* \* \* \* \*   \* \* \* \* \*   \* \* \* \* \*

  

|                 |                                               |     |
|-----------------|-----------------------------------------------|-----|
| 1 Rifleman (aa) | R L D N                                       |     |
| 1 Rifleman      | GAGGCTGGACAACGTAAGTATTGGACAAGAAGTTGTTGTTAGTA  | 222 |
| 35 Crested ibis | GAGGCTGGACAATGTAAAGTATTGGACAAGAAGTTGTTGTTAGTA | 223 |
| 36 Little egret | GAGGCTGGACAACATAAGTATTGGACAAGAGCATTACTGTTAGTA | 221 |

\* \* \* \* \*   \* \* \* \* \*   \* \* \* \* \*   \* \* \* \* \*

## C. Multiple alignment of exon 4 sequences from 11 birds

```

1 Rifleman (aa)           F A V P V E E T       T Y A C T
1 Rifleman               cgtgtgttttcttttccagTTTGCTGTCCAGTAGAAGAAACG----ACGTATGCCTGTAC   56
11 Kea                   tgtgtgttttcttttccaaTTTGCCATTCCAGTTGAAGAAATCACAACATATCCCTGTAC   60
12 Budgerigar           catgtgttttcttttccatTTTGCTGTCTGGCTGAAGAAACC----ATATATGCCTGTAT   56
13 Puerto Rican Amazon  tgtgtgttttcttttccatTTTGCTGTCCAGCTGAAGAAACC----CTATATGCCTGTAC   56
14 Scarlet macaw        tatgtgttttcttttccatTTTGCTGTCCAGTTGAAGAAACC----CTATATGCCTGTAC   56
15 Saker falcon         tgtgtcttttcttttccagTTTGCTGTCCAGTTAAGAAACC----AAGTATGCTTGTAC   55
16 Peregrine falcon     tgtgtcttttcttttccagTTTGCTGTCCAGTTAAGAAACC----AAGTATGCTTGTAC   55
22 Cuckoo roller        tgtgtgttttcttttccagTTTGCCATTCTAGCTGAAGAAACC----AAATATGCATGTAC   56
23 Speckled mousebird   tgggtgttttcttttccaaTTTGCTGTCCAGTTGAAAAAAC----TAGCATGTCTGTAC   56
29 Sunbittern           tgtctgttttcttttccagTTTGTTGTTCCTGTTGAAGAAAC----AAGTATGCCGGTGC   56
34 Great cormorant      tgtgtgtgtctttt-----TTCCAGTTGAAGAAACC----AAGTGTGCCTGTAC   45
          * * * * *          * * * * *          * * * * *          * * * * *

1 Rifleman (aa)         F I P L P M V K Q   K H H   I Y K
1 Rifleman             CTTTATCCCACTGCCCATGGTCAAGCAG-AAACACCAC-ATCTACAAGgtaaactcacag   114
11 Kea                 CTTTATCCCACTGCCCACTGTCAAGCAG-AAACACCATATCTACAAGgtaaatttgcag   119
12 Budgerigar         CTTTATCCCACT-----GTCAAGCAG-AAACACCATATCTACAAGgtaaatttgcag   108
13 Puerto Rican Amazon CTTTATCCCACT-----GTCAAGCAG-AAACACCATATCTACAAGgtaaatttgcag   108
14 Scarlet macaw      CTTTATCCCACT-----GTCAAGCAG-AAACACCATATCTACAAGgtaaatttgcag   108
15 Saker falcon       TTTTATCCCCTGCCCATGGCCAAGCAG-AAACACCAT-GTCTACAAGgtaaaattgcag   113
16 Peregrine falcon  TTTTATCCCCTGCCCATGGCCAAGCAG-AAACACCAT-GTCTACAAGgtaaaattgcag   113
22 Cuckoo roller      CTTTATCCCACTGCCCATGGTCAAGCAG-AAACACCAT-ATCTACAAGgtaaacttgcag   113
23 Speckled mousebird CTTTATGCCACTGACCATGGCCAAGCAG-AAACACTAT-TATCAAGgtaaatttgcag   112
29 Sunbittern         CTTTATCCCACTGCCCTGTGGTCGAGCAG-AAACACCAT-ATCTACAAGgtaaacttgcag   115
34 Great cormorant    CTTTATCCCACT-----GCCAAGCAG-AGACACCAC-GTCTACAAGgtaaacttgcag   96
          * * * * *          * * * * *          * * * * *          * * * * *

```

## D. Multiple alignment of exon 5 sequences from 3 birds

```

1 Rifleman (aa)           F E P V I T S H N I
1 Rifleman             aatatttttgaactctttttcttggttacagTTTGAACCTGTAATAACATCCCACAATATA   60
17 Red-legged_seriema  ataatttttctcttcttcttcttggttacagTTTGAACCTGTAATAACATGCCACAACATC   60
21 Bar-tailed_trogon   actttctctgactcttttcttggtttccagTTTGAACCTGTAATAACATCCCACAACATC   60
          * * * * *          * * * * *          * * * * *          * * * * *

1 Rifleman (aa)         T L V H H I L V Y A C G N S S I L P S G
1 Rifleman             ACCTTGGTTCATCATATTTCTGTTTATGCCTGTGGCAACTCCAGCATCCTACCCAGTGGC   120
17 Red-legged_seriema  ACCTTGGGTTCATCATATTTCTGTTTATGCCTGTGGCAACGCCAGCGTTACCCAGTGGC   120
21 Bar-tailed_trogon   ACCTTGGTTCATCATATTTCTGTTTATGCCTGCGGCAGCTCTGGCGTGTGGCCAGTGGC   120
          * * * * *          * * * * *          * * * * *          * * * * *

1 Rifleman (aa)         I G D C Y G A N P D F S L       C S Q V L
1 Rifleman             ATAGGTGATTGCTATGGAGCCAATCCAGATTTTCCCT-----GTGCTCTCAGGTCTCT   173
17 Red-legged_seriema  ATAGACGATTGCTATGGAGCCAAGCCAGATTTTCCCT-----GTGCTGTCAGGTCTCT   173
21 Bar-tailed_trogon   ACAGATGATTGCTATGGAGCCAATCCAGATTTTACCCTCAGATTAAGTCTCTCAGGTCTCT   180
          * * * * *          * * * * *          * * * * *          * * * * *

1 Rifleman (aa)         V G W A V G G E
1 Rifleman             TGTGGGCTGGGCTGTTGGAGGAGAGgtgagtctgcagggccattccttcccta   228
17 Red-legged_seriema  TGTGGGCTGGGCTGTTGGAGGAGAGgtgagtctgcagaaaccattccttcccca   228
21 Bar-tailed_trogon   TGTGGGCTGGGCTGTTGGGAGAGAGgtgaatctgtggggccattccttcccca   235
          * * * * *          * * * * *          * * * * *          * * * * *

```

## E. Multiple alignment of exon 7 sequences from 4 birds

```

1 Rifleman (aa)                L I D S S G I R I
1 Rifleman                    ttgctaagagagaggtcatttttcttttacagGCTTGATTGACAGCTCAGGGATACGAAT 60
20 Rhinoceros hornbill       tggtcattgctgaggtaatattttcttttacagCCTTGATTGACAGCTCAGGGGTACGAAT 60
44 Anna's hummingbird        atgatgaagaagtggcaatttttgttttacagATTGATTGACAGTTCAGGGGTATGAAT 60
49 Brown mesite               cagctgaaggagtaggtcatttttcttttacagGTTTGATCGACAGCTCAGGGGTACAAAT 60
* * * * *

1 Rifleman (aa)                Y Y T P E L R K Y D V G V L Q T G V F I
1 Rifleman                    CTACTACACACCAGAGCTACGGAAATATGATGTGGGGTTCTGCAAACAGGTGTCTTCAT 120
20 Rhinoceros hornbill       CTACTATACTCCGGAGATACGAAATATGATGTGGGATTCTGCAAACAGGCATCTTCAT 120
44 Anna's hummingbird        -----CACCAGAGCTACGGAAATATGATGTGGGGATTCTGCAAACAGGTGTCTTCAT 112
49 Brown mesite               CTAACACCTTCAGAGCTACGGAAATATGATGTGGGGTTCTGCAAACAGGCATCTTCAC 120
* * * * *

1 Rifleman (aa)                F P A H F I P P G A E S Y R S Y G L C N
1 Rifleman                    TTTCCTGCACATTTTCATTCCTCCTGGAGCAGAATCCTACAGATCTTACGGTCTTTGCAA 180
20 Rhinoceros hornbill       TTTCTGTGCATTTTCATTCCTCCTGGGGACAATCCTACAAATCTTACGGCCTTTGCAA 179
44 Anna's hummingbird        TTTCCTGTGCATTTTCATTCCTCCTGGAGCAGAATCCTACAGATCTTATGGACTTTGCAA 172
49 Brown mesite               TCTCCTGTGCATTTTCATTCCTCCTGGAGCAGTATCCTACAGATCTCATGGTCTTTACAA 180
* * * * *

1 Rifleman (aa)                S S Q F D E
1 Rifleman                    TTCCAGCCAGTTCGACGAAgtgagtgtgggaaagccatacaaaattct 229
20 Rhinoceros hornbill       TTCCAGCCAGTTTGATGAAgtgagtgtgggaaagccatac-aaattct 227
44 Anna's hummingbird        TTCCAGCCAGTTTGATGAAgtgagtgtgggacagccatacagagatcct 221
49 Brown mesite               TTCCAGCCAGTTTGATGAAgtgagtgtgggaaagacatgcaaaatcct 229
***** * * * *

```

## F. Multiple alignment of exon 8 sequences from 3 birds

```

1 Rifleman (aa)                M N G M L V P D
1 Rifleman                    ggctctgatgttctctgttttgaactgcaagATGAATGGG-----ATGCTGGTTCCAGA 53
31 Emperor penguin          gactctgacctacttctattttgaactgcaagATGAATGGTCCAGATCTGCTGGTTCCAGA 60
32 Adelle penguin          gactctgacctacttctattttgaactgcaagATGAATGGG-----ATGCTGGTTCCAGA 53
* * * * *

1 Rifleman (aa)                L H V F A Y L L H T H L S G R G V K V
1 Rifleman                    TCTCCATGTC--TTTGCCTACTGCTTACACTCACCTGTCTGGCAGAGGAGTGAAGCT 111
31 Emperor penguin         TCTGCATGTC--TTTGCCTACTTGTTCATACCCACCTGTCTGGCAGAGGAGTGAAGCT 118
32 Adelle penguin          TCTGCATGTC--TTTGCCTACTTGTTCATACCCACCTGTCTGGCAGAGGAGTGAAGCT 113
*** * * * *

1 Rifleman (aa)                V Q Y R
1 Rifleman                    GTTCAATACCGgttaagagaaggaacac--agtattgctggac 152
31 Emperor penguin         GTCATACCGgttaagagaagcaaac--ggtattgctgct 159
32 Adelle penguin          GTCATACCGgttaagagaagcaaacatagtgctgct 156
* * * * *

```

## G. Multiple alignment of exon 9 sequences from 2 birds

```

1 Rifleman (aa)                N G E Q L R I I C E
1 Rifleman                    cacacttctccctttgtttgtcctcccaagGAACGGTGAGCAGCTGAGGATCATCTGTGA 60
19 Northern carmine bee-eater taactttctcccttctctgtctttcccaagGAATGGTGAGCAGCTAAGGATCATCTGTGA 60
* * * * *

1 Rifleman (aa)                D N K Y D F R L Q E I R D T K E I L T I
1 Rifleman                    GGACAATAAGTATGACTTCAGGTCAGGAAATTCGGGACACGAAGAAATCCTCACAAT 120
19 Northern carmine bee-eater GGACAATAAGTATGACTTCAGG-----ACATTGAGGACATGAAGAAATGTGATAAC 113
***** * * * *

1 Rifleman (aa)                K P
1 Rifleman                    TAAACCAgttatgacctctcctgggatgtagcactgg 157
19 Northern carmine bee-eater CAAACCAgttaagaccttccctgtgacacagccacgg 150
***** * * * *

```
