# Supplementary material for: MOXD2, a Gene Possibly Associated with Olfaction, Is Frequently Inactivated in Birds
Source: PubMed Central journal article supplement (PMC4830563; doi:10.1371/journal.pone.0152431), 2016-04-13
Supplement: pone.0152431.s004.pdf [file pone.0152431.s004.pdf]

# S4 Fig. WGS sequence assemblies of selected exons

## A. Golden-collared manakin (No. 2), exon 1, WGS data

- CAP3 alignment of WGS data spanning exon 1 (uppercase letters)

```
SRR946955.63931851.2+      .      :      .      :      .      :      .      :      .      :      .      :
SRR946955.104117134.2+      tgaagtggtagtgggtgATGGCAGTGCCTTCTCAAGA
SRR946955.28016599.1+      ATGGCAGTGCCTTCTCAAGA
SRR946955.72129725.1+      ATGGCAGTGCCTTCTCAAGA
                               CAAGA
consensus                    tgaagtggtagtgggtgATGGCAGTGCCTTCTCAAGA

SRR946955.63931851.2+      .      :      .      :      .      :      .      :      .      :      .      :
SRR946955.104117134.2+      ATCCAGGGTATGCTCTTCCCTCTTGTTCGGTCAGCCTGCAG
SRR946955.28016599.1+      ATCCAGGGTATGCTCTTCCCTCTTGTTCGGTCAGCCTGCAGCTCCACTACTGCA
SRR946955.72129725.1+      ATCCAGGGTATGCTCTTCCCTCTTGTTCGGTCAGCCTGCAGCTCCACTACTGCATTTCTC
SRR946955.44534172.2+      TCCAGGGTATGCTCTTCCCTCTTGTTCGGTCAGCCTGCAGCTCCACTACTGCATTTCTC
SRR946955.58346422.1+      AGGGTATGCTCTTCCCTCTTGTTCGGTCAGCCTGCAGCTCCACTACTGCATTTCTC
SRR946955.1407940.2+      GTATGCTCTTCCCTCTTGTTCGGTCAGCCTGCAGCTCCACTACTGCATTTCTC
SRR946955.112874748.2+      TATGCTCTTCCCTCTTGTTCGGTCAGCCTGCAGCTCCACTACTGCATTTCTC
SRR946957.52145586.1+      TCCACTACTGCATTTCTC
SRR946957.74253506.1+      CCACTACTGCATTTCTC
SRR946957.71782474.2-      CACTACTGCATTTCTC
SRR946955.104117134.1-      CTACTGCATTTCTC
SRR946957.84913099.2-      CTACTGCATTTCTC
SRR946957.103208127.1-      TACTGCTTTTCTC
SRR946958.69296965.2+      ACTGCATTTCTC
SRR946955.63931851.1-      TGCATTTCTC
SRR946960.106834680.1-      TGCATTTCTC
SRR946957.59413978.1-      GCATTTCCC
SRR946958.16186972.2-      GCATTTCTC
SRR946957.117350774.1+      CATTCTC
SRR946957.94635362.2-      CATTCTC
SRR946960.37232613.2+      CATTCTC
SRR946958.1915339.2+      ATTTCTC
SRR946960.2459542.2+      ATTTCTC
SRR946960.29865046.1-      TTTCCC
SRR946960.3126220.2+      TTCTC
SRR946957.73860379.2-      CTC
SRR946957.94172165.2-      CTC
SRR946958.69981891.1+      CTC
SRR946958.83070100.1-      CTC

consensus                    ATCCAGGGTATGCTCTTCCCTCTTGTTCGGTCAGCCTGCAGCTCCACTACTGCATTTCTC

SRR946955.28016599.1+      .      :      .      :      .      :      .      :      .      :      .      :
SRR946955.44534172.2+      CACCTCCCTGGATC
SRR946955.1407940.2+      CACCTCCCTGGATCCTTCCAACACAAT
SRR946955.112874748.2+      CACCTCCCTGGATCCTTCCAACACAAT
SRR946955.72129725.1+      CACCTCCCTGGATCCTTCCAACACAATCCACCTCC
SRR946955.58346422.1+      CACCTCCCTGGATCCTTCCAACACAATCCACCTCCGCTGGGACC
SRR946955.104117134.1-      CACCTCCCTGGATCCTTCCAACACAATCCACCTCCGCTGGGACCATGATGAACAGGAGCT
SRR946955.63931851.1-      CACCTCCCTGGATCCTTCCAACACAATCCACCTCCGCTGGGACCATGATGAACAGGAGCT
SRR946957.103208127.1-      CCCCTCCCTGGATCCTTCCAACACAATCCACCTCCGCTGGGACCATGATGAACAGGAGCT
SRR946957.117350774.1+      CACCTCCCTGGATCCTTCCAACACAATCCACCTCCGCTGGGACCATGATGAACAGGAGCT
SRR946957.52145586.1+      CACCTCCCTGGATCCTTCCAACACAATCCACCTCCGCTGGGACCATGATGAACAGGAGCT
SRR946957.59413978.1-      CCCCCCTGGATCCTTCCAACACAATCCACCTCCGCTGGGACCATGATGAACAGGAGCT
SRR946957.71782474.2-      CCCCTCCCTGGATCCTTCCAACACAATCCACCTCCGCTGGGACCATGATGAACAGGAGCT
SRR946957.73860379.2-      CCCCTCCCTGGATCCTTCCAACACAATCCACCTCCGCTGGGACCATGATGAACAGGAGCT
SRR946957.74253506.1+      CACCTCCCTGGATCCTTCCAACACAATCCACCTCCGCTGGGACCATGATGAACAGGAGCT
SRR946957.84913099.2-      CACCTCCCTGGATCCTTCCAACACAATCCACCTCCGCTGGGACCATGATGAACAGGAGCT
SRR946957.94172165.2-      CCCCTCCCTGGATCCTTCCAACACAATCCACCTCCGCTGGGACCATGATGAACAGGAGCT
SRR946957.94635362.2-      CACCTCCCTGGATCCTTCCAACACAATCCACCTCCGCTGGGACCATGATGAACAGGAGCT
SRR946958.16186972.2-      CACCTCCCTGGATCCTTCCAACACAATCCACCTCCGCTGGGACCATGATGAACAGGAGCT
SRR946958.1915339.2+      CACCTCCCTGGATCCTTCCAACACAATCCACCTCCGCTGGGACCATGATGAACAGGAGCT
SRR946958.69296965.2+      CACCTCCCTGGATCCTTCCAACACAATCCACCTCCGCTGGGACCATGATGAACAGGAGCT
SRR946958.69981891.1+      CACCTCCCTGGATCCTTCCAACACAATCCACCTCCGCTGGGACCATGATGAACAGGAGCT
SRR946958.83070100.1-      CCCCTCCCTGGATCCTTCCAACACAATCCACCTCCGCTGGGACCATGATGAACAGGAGCT
SRR946960.106834680.1-      CCCCTCCCTGGATCCTTCCAACACAATCCACCTCCGCTGGGACCATGATGAACAGGAGCT
SRR946960.2459542.2+      CACCTCCCTGGTTTCCCTTCCAACACAATCCACCTCCGCTGGGACCATGATGAACAGGAGCT
SRR946960.29865046.1-      CCCCTCCCTGGATCCTTCCAACACAATCCACCTCCGCTGGGACCATGATGAACAGGAGCT
SRR946960.3126220.2+      CACCTCCCTGGATCCTTCCAACACAATCCACCTCCGCTGGGACCATGATGAACAGGAGCT
SRR946960.37232613.2+      CACCTCCCTGGATCCTTCCAACACAATCCACCTCCGCTGGGACCATGATGAACAGGAGCT
SRR946955.99198518.2+      CTCCTGGATCCTTCCAACACAATCCACCTCCGCTGGGACCATGATGAACAGGAGCT
SRR946958.37554905.1+      CTCCTGGATCCTTCCAACACAATCCACCTCCGCTGGGACCATGATGAACAGGAGCT
```

SRR946957.15624193.2- TCCCTGGATCCTTCCAACACAATCCACCTCCGCTGGGACCATGATGAACAGGAGCT  
SRR946955.28016599.2- CCTGGATCCTTCCAACACAATCCACCTCCGCTGGGACCATGATGAACAGGAGCT  
SRR946957.47194416.1- GATCCTTCCAACACAATCCACCTCCGCTGGGACCATGATGAACAGGAGCT  
SRR946960.1628156.2- ATCCTTCCAACACAATCCACCTCCGCTGGGACCATGATGAACAGGAGCT  
SRR946957.983545.1+ TCCTTCCAACACAATCCACCTCCGCTGGGACCATGATGAACAGGAGCT  
SRR946960.11892854.2+ TCCTTCCAACACAATCCACCTCCGCTGGGACCATGATGAACAGGAGCT  
SRR946957.60371889.2- CCAACACAATCCACCTCCGCTGGGACCATGATGAACAGGAGCT  
SRR946957.62700518.2- CCAACACAATCCACCGCCGCTGGAACCATGATGAACAGGAGCT  
SRR946960.97828224.1- CACAATCCCCCTCCGCTGGGACCATGATGAACAGGAGCT  
SRR946957.31666787.1- CAATCCACCTCCGCTGGGACCATGATAAACAGGAGCT  
SRR946960.15295326.1- CAATCCTCCTCCGCTGGGACCATGATGAACAGGAGCT  
SRR946955.73984303.1+ AATCCACCTCCGCTGGGACCATGATGAACAGGAGCT  
SRR946955.1407940.1- ACCTCCGCTGGGACCATGATGAACAGGAGCT  
SRR946960.77112329.1+ ACCTCCGCTGGGACCATGATGAACAGGAGCT  
SRR946955.58346422.2- CCCCCTGGGACCATGATGAACAGGAGCT  
SRR946960.28393688.2- CCCCCTGGGACCATGATGAACAGGAGCT  
SRR946955.112874748.1- TCCGCTGGGACCATGATGAACAGGAGCT  
SRR946958.97045906.2+ TCCGCTGGGACCATGATGAACAGGAGCT  
SRR946955.44534172.1- CCGCTGGGACCATGATGAACAGGAGCT  
SRR946963.367693.1- CCGCTGGGACCATGATGAACAGGAGCT  
SRR946961.32098347.2+ CGCTGGGACCATGATGAACAGGAGCT  
SRR946955.25344625.2+ TGGGACCATGATGAACAGGAGCT  
SRR946960.26708667.2- TGGGACAATGATGAAAAGGAGCT  
SRR946960.5920316.1- TGGGACCATGATGAACAGGAGCT  
SRR946957.38019584.2+ GGGACCATGATGAACAGGAGCT  
SRR946959.36321848.2+ GGACCATGATGAACAGGAGCT  
SRR946959.55916250.2- GGACCATGATGAACAGGAGCT  
SRR946960.39066531.1- GGACCATGAGGAACAGGAGCT  
SRR946955.72129725.2- CCATGATGAACAGGAGCT  
SRR946959.109004496.2+ CCATGATGAACAGGAGCT  
SRR946959.48788881.2+ CCATGATGAACAGGAGCT  
SRR946959.50720170.1+ CCATGATGAACAGGAGCT  
SRR946959.76768301.1+ CCATGATGAACAGGAGCT  
SRR946959.3069236.2- CATGATGAACAGGAGCT  
SRR946959.52109877.2- CATGATGAACAGGAGCT  
SRR946960.81123918.1- CATGATGAACAGGAGCT  
SRR946957.45164104.2- ATGATGAACAGGAGCT  
SRR946964.63159785.2+ ATGATGAACAGGAGCT  
SRR946963.62990066.2- TGATGAACAGGAGCT  
SRR946960.1810227.2+ GATGAACAGGAGCT  
SRR946957.110600614.2+ ATGAACAGGAGCT  
SRR946957.46436543.1+ ATGAACAGGAGCT  
SRR946964.24045114.1+ ATGAACAGGAGCT  
SRR946957.9360394.2+ AACAGGAGCT  
SRR946959.104735650.2+ ACAGGAGCT  
SRR946963.71360651.2+ ACAGGAGCT  
SRR946955.112096017.1+ GGAGCT  
SRR946963.8610550.2+ GAGCT  
SRR946964.47953399.2+ GAGCT  
SRR946963.27476630.1- AGCT  
SRR946964.4978041.2- AGCT  
SRR946964.68540145.2- AGCT  
SRR946961.34249143.1- CT  
SRR946959.109831930.1+ T  
SRR946960.105947877.2- T  
SRR946960.98815412.1- T

consensus

CACTCCCTGGATCCTTCCAACACAATCCACCTCCGCTGGGACCATGATGAACAGGAGCT

. : . : . : . : . : . :  
SRR946960.2459542.2+ GATGACATTTGAGCTGCAGGT  
SRR946957.52145586.1+ GATGACATTTGAGCTGCAGGTC  
SRR946963.367693.1- GATGACATTTGAGCTGCAGGTC  
SRR946957.59413978.1- GATGACATTTGAGCTGCAGGTCC  
SRR946957.74253506.1+ GATGACATTTGAGCTGCAGGTCC  
SRR946961.32098347.2+ GATGACATTTGAGCTGCAGGTCC  
SRR946957.71782474.2- GATGACATTTGAGCTGCAGGTCCA  
SRR946955.104117134.1- GATGACATTTGAGCTGCAGGTCCATA  
SRR946955.28016599.2- GATGACATTTGAGCTGCAGGTCCATA  
SRR946955.99198518.2+ GATGACATTTGAGCTGCAGGTCCATA  
SRR946957.84913099.2- GATGACATTTGAGCTGCAGGTCCATA  
SRR946957.103208127.1- GATGACATTTGAGCTGCAGGTCCATAC  
SRR946958.69296965.2+ GATGACATTTGAGCTGCAGGTCCATACA  
SRR946959.36321848.2+ GATGACATTTGAGCTGCAGGTCCATACA  
SRR946959.55916250.2- GATGACATTTGAGCTGCAGGTCCATACA  
SRR946955.63931851.1- GATGACATTTGAGCTGCAGGTCCATACAAC  
SRR946960.106834680.1- GATGACATTTGAGCTGCAGGTCCATACAAC  
SRR946960.37232613.2+ GATGACATTTGAGCTGCAGGTCCATACAAC  
SRR946958.16186972.2- GATGACATTTGAGCTGCAGGTCCATAAAT  
SRR946959.109004496.2+ GATGACATTTGAGCTGCAGGTCCATAAAT  
SRR946959.48788881.2+ GATGACATTTGAGCTGCAGGTCCATAAAT  
SRR946959.50720170.1+ GATGACATTTGAGCTGCAGGTCCATAAAT  
SRR946959.76768301.1+ GATGACATTTGAGCTGCAGGTCCATAAAT  
SRR946957.117350774.1+ GATGACATTTGAGCTGCAGGTCCATAAATG

SRR946957.73860379.2- GATGACATTTGAGCTGCAGGTCCATAACAATG  
SRR946957.94635362.2- GATGACATTTGAGCTGCAGGTCCATAACAATG  
SRR946959.3069236.2- GATGACATTTGAGCTGCAGGTCCATAACAATG  
SRR946959.52109877.2- GATGACATTTGAGCTGCAGGTCCATAACAATG  
SRR946958.1915339.2+ GATGACATTTGAGCTGCAGGCCCTACAACAATG  
SRR946964.63159785.2+ GATGACATTTGAGCTGCAGGTCCATAACAATGG  
SRR946960.29865046.1- GATGACATTTGAGCTGCAGGTCCATAACAATGGC  
SRR946963.62990066.2- GATGACATTTGAGCTGCAGGTCCATAACAATGGCT  
SRR946957.94172165.2- GATGACATTTGAGCTGCAGGTCCATAACAATGGCT  
SRR946960.3126220.2+ GATGACATTTGAGCTGCAGGTCCATAACAATGGCT  
SRR946964.24045114.1+ GATGACATTTGAGCTGCAGGTCCATAACAATGGCTG  
SRR946958.69981891.1+ GATGACATTTGAGCTGCAGGTCCATAACAATGGCTGG  
SRR946958.83070100.1- GATGACATTTGAGCTGCAGGTCCATAACAATGGCTGG  
SRR946959.104735650.2+ GATGACATTTGAGCTGCAGGTCCATAACAATGGCTGGGT  
SRR946963.71360651.2+ GATGACATTTGAGCTGCAGGTCCATAACAATGGCTGGGGG  
SRR946957.983545.1+ GATGACATTTGAGCTGCAGGTCCATAACAATGGCTGGGGGGCA  
SRR946958.37554905.1+ GATGACATTTGAGCTGCAGGTCCATAACAATGGCTGGGGGGGA  
SRR946963.8610550.2+ GATGACATTTGAGCTGCAGGTCCATAACAATGGCTGGGGGGCA  
SRR946957.15624193.2- GATGACATTTGAGCTGCAGGTCCATAACAATGGCTGGGTGGCAT  
SRR946964.47953399.2+ GATGACATTTGAGCTGCAGGTCCATAACAATGGCTGGGGGGCAT  
SRR946963.27476630.1- GATGACATTTGAGCTGCAGGTCCATAACAATGGCTGGGTGGCATT  
SRR946964.4978041.2- GATGACATTTGAGCTGCAGGTCCATAACAATGGCTGGGTGGCATT  
SRR946964.68540145.2- GATGACATTTGAGCTGCAGGTCCATAACAATGGCTGGGTGGCATT  
SRR946961.34249143.1- GATGACATTTGAGCTGCAGGTCCATAACAATGGCTGGGTGGCATTG  
SRR946959.109831930.1+ GATGACATTTGAGCTGCAGGTCCATAACAATGGCTGGGTGGCATTGG  
SRR946957.47194416.1- GATGACATTTGAGCTGCAGGTCCATAACAATGGCTGGGTGGCATTGGAT  
SRR946960.11892854.2+ GATGACATTTGAGCTGCAGGTCCATAACAATGGCTGGGGGGCCTTTGGATT  
SRR946960.1628156.2- GATGACATTTGAGCTGCAGGTCCATAACAATGGCTGGGTGGCATTGGATT  
SRR946955.58346422.2- GATGACATTTGAGCTGCAGGTCCATAACAATGGCTGGGTGGCATTGGATTGAGC  
SRR946957.60371889.2- GATGACATTTGAGCTGCAGGTCCATAACAATGGCTGGGTGGCATTGGATTGAGCC  
SRR946955.25344625.2+ GATGACATTTGAGCTGCAGGTCCATAACAATGGCTGGGTGGCATTGGATTGAGCCC  
SRR946955.73984303.1+ GATGACATTTGAGCTGCAGGTCCATAACAATGGCTGGGGGGCATTGGATTGAGCCC  
SRR946957.62700518.2- GATGACATTTGAGCTGCAGGTCCATAACAATGGCTGGGTGGCATTGGATTGAGCCC  
SRR946960.97828224.1- GATGACATTTGAGCTGCAGGTCCATAACAATGGCTGGGTGGCATTGGATTGAGCCCT  
SRR946957.31666787.1- GATGACATTTGGGCTGCAGGTCCATAACAATGGCTGGGTGGCATTGGATTGAGCCCTC  
SRR946960.28393688.2- GATGACATTTGAGCTGCAGGTCCATAACAATGGCTGGGTGGCATTGGATTGAGCCCTC  
SRR946960.77112329.1+ GATGACATTTGAGCTGCAGGTCCATAACAATGGCTGGGGGGCAATTGGATTGAGCCCTC  
SRR946955.112096017.1+ GATGACATTTGAGCTGCAGGTCCATAACAATGGCTGGGTGGCATTGGATTGAGCCCTCA  
SRR946955.112874748.1- GATGACATTTGAGCTGCAGGTCCATAACAATGGCTGGGTGGCATTGGATTGAGCCCTCA  
SRR946955.1407940.1- GATGACATTTGAGCTGCAGGTCCATAACAATGGCTGGGTGGCATTGGATTGAGCCCTCA  
SRR946955.44534172.1- GATGACATTTGAGCTGCAGGTCCATAACAATGGCTGGGTGGCATTGGATTGAGCCCTCA  
SRR946955.72129725.2- GATGACATTTGAGCTGCAGGTCCATAACAATGGCTGGGTGGCATTGGATTGAGCCCTCA  
SRR946957.110600614.2+ GATGACATTTGAGCTGCAGGTCCATAACAATGGCTGGGTGGGATTGGGTTGAGCCCTCA  
SRR946957.38019584.2+ GATGACATTTGAGCTGCAGGTCCATAACAATGGCTGGGTGGCATTGGATTGAGCCCTCA  
SRR946957.45164104.2- GATGACATTTGAGCTGCAGGTCCATAACAATGGCTGGGTGGCATTGGATTGAGCCCTCA  
SRR946957.46436543.1+ GATGACATTTGAGCTGCAGGTCCATAACAATGGCTGGGGGGCATTGGATTGAGCCCTCA  
SRR946957.9360394.2+ GATGACATTTGAGCTGCAGGTCCATAACAATGGCTGGGTGGCATTGGATTGAGCCCTCA  
SRR946958.97045906.2+ GATGACATTTGAGCTGCAGGTCCATAACAATGGCTGGGGGGCATTGGATTGAGCCCTCA  
SRR946960.105947877.2- GATGACATTTGAGCTGCAGGTCCATAACAATGGCTGGGTGGCATTGGATTGAGCCCTCA  
SRR946960.15295326.1- GATGACATTTGAGCTGCAGGTCCATAACAATGGCTGGGTGGCATTGGATTGAGCCCTCA  
SRR946960.1810227.2+ GATGACATTTGAGCTGCAGGTCCATAACAATGGCTGGGGGGCATTGGATTGAGCCCTCA  
SRR946960.26708667.2- GATGACATTTGAGCTGCAGGTCCATAACAATGGCTGGGTGGCATTGGATTGAGCCCTCA  
SRR946960.39066531.1- GATGACATTTGAGCTGCAGGTCCATAACAATGGCTGGGTGGCATTGGATTGAGCCCTCA  
SRR946960.5920316.1- GATGACATTTGAGCTGCAGGTCCATAACAATGGCTGGGTGGCATTGGATTGAGCCCTCA  
SRR946960.81123918.1- GATGACATTTGAGCTGCAGGTCCATAACAATGGCTGGGTGGCATTGGATTGAGCCCTCA  
SRR946960.98815412.1- GATGACATTTGAGCTGCAGGTCCATAACAATGGCTGGGTGGCATTGGATTGAGCCCTCA  
SRR946958.109621346.1- GACATTTGAGCTGCAGGTCCATAACAATGGCTGGGGGGCTTTTGGATTGAGCCCTCA  
SRR946958.9738316.2- ACATTTGAGCTGCAGGTCCATAACAATGGCTGGGTGGCATTGGATTGAGCCCTCA  
SRR946960.90974710.1- TTTGAGCTGCAGATCCATAACAATGGCGGGGTGGCATTGGATTGAGCCCTCA  
SRR946960.79233224.1- TTGAGCTGCAGGTCCATAACAATGGCTGGGTGGCATTGGATTGAGCCCTCA  
SRR946963.89925099.1+ TGAGCTGCAGGTCCATAACAATGGCTGGGGGGCATTGGATTGAGCCCT  
SRR946964.59460155.1- TGAGCTGCAGGTCCATAACAATGGCTGGGTGGCATTGGATTGAGCCCT  
SRR946957.69847799.2+ TGAGCTGCAGGTCCATAACAATGGCTGGGGGGCATTGGATTGAGCCCTCA  
SRR946963.20401976.2- GAGCTGCAGGTCCATAACAATGGCTGGGTGGCATTGGATTGAGCCCTC  
SRR946958.35361805.2- GAGCTGCAGGTCCATCCAATGGCTGGGTGGCATTGGATTGAGCCCTCA  
SRR946960.25709152.2- AGCTGCAGGTCCATAACAATGGCTGGGTGGCATTGGATTGAGCCCTCA  
SRR946961.4459041.1- GCTGCAGGTCCATAACAATGGCTGGGTGGCATTGGATTGAGCCCTCA  
SRR946960.91024589.1- TGCAGGTCCATAACAATGGCTGGGTGGCATTGGATTGAGCCCTCA  
SRR946957.105630903.1+ CAGGTCCATAACAATGGCTGGGTGGCATTGGACTGAGCCCCCA  
SRR946957.117309917.2+ AGGTCCATAACAATGGCTGGGTGGCATTGGATTGAGCCCTCA  
SRR946957.90080588.2- AGGTCCATAACAATGGCTGGGTGGCATTGGATTGAGCCCTCA  
SRR946963.50779704.1+ AGTCCATAACAATGGCTGGGTGGCATTGGATTGAGCCCTCA  
SRR946955.109130572.1+ GTCCATAACAATGGCTGGGTGGCATTGGATTGAGCCCTCA  
SRR946958.66642230.1- TCCATAACAATGGCTGGGTGGCATTGGATTGAGCCCTCA  
SRR946960.57097995.1- TCCATAACAATGGCTGGGTGGCATTGGATTGAGCCCTCA  
SRR946959.43540423.2+ CCATAACAATGGCTGGGTGGCATTGGATTGAGCCCTCA  
SRR946959.6283813.2+ CCATAACAATGGCTGGGTGGCATTGGATTGAGCCCTCA  
SRR946957.12408494.1+ ATACAATGGCTGGGTGGCATTGGATTGAGCCCTCA  
SRR946960.4354927.2- ATACAATGTCTGGGTGGCATTGGATTGAGCCCTCA  
SRR946955.99198518.1- TACAATGGCTGGGTGGCATTGGATTGAGCCCTCA  
SRR946957.89864013.2- ACAATGGCTGGGTGGCATTGGATTGAGCCCTCA  
SRR946959.45818324.2- ACAATGGCTGGGTGGCATTGGATTGAGCCCTCA  
SRR946957.15683146.2- CAACTGGCTGGGTGGCATTGGATTGAGCCCTCA  
SRR946964.65578922.2- CAACTGGCTGGGTGGCATTGGATTGAGCCCTCA

|                        |                                   |
|------------------------|-----------------------------------|
| SRR946958.21115458.2-  | AACTGGCTGGGTGGCATTGGATTTCAGCCCTCA |
| SRR946955.72441576.2+  | CTGGCTGGATGGCATTGGATTTCAGCCCTCA   |
| SRR946957.65045800.1-  | TGGCTGGGTGGCATTGGATTTCAGCCCTCA    |
| SRR946958.100558939.2+ | TGGCTGGGTGGCATTGGATTTCAGCCCTCA    |
| SRR946957.46227545.1+  | GCTGGGTGGCATTGGATTTCAGCCCTCA      |
| SRR946959.47282992.1+  | TGGGTGGCATTGGATTTCAGCCCTCA        |
| SRR946959.13433807.1-  | GGGTGGCATTGGATTTCAGCCCTCA         |
| SRR946959.21075074.1-  | GGGTGGCATTGGATTTCAGCCCTCA         |
| SRR946959.76557600.1-  | GGGTGGCATTGGATTTCAGCCCTCA         |
| SRR946963.20403013.2+  | GGGTGGCATTGGATTTCAGCCCTCA         |
| SRR946957.12900251.1-  | GGTGGCATTGGATTTCAGCCCTCA          |
| SRR946960.102188235.1+ | GGTGGCATTGGATTTCAGCCCTCA          |
| SRR946960.56373046.2+  | GGTGGCATTGGATTTCAGCCCTCA          |
| SRR946963.106067756.2+ | GGTGGCATTGGATTTCAGCCCTCA          |
| SRR946963.99457526.2-  | GGTGGCATTGGATTTCAGCCCTCA          |
| SRR946964.8249685.2+   | GGTGGCATTGGATTTCAGCCCTCA          |
| SRR946962.72246860.1+  | GTGGCATTGGATTTCAGCCCTCA           |
| SRR946963.48241.1-     | GTGGCATTGGATTTCAGCCCTCA           |
| SRR946958.58370706.2+  | TGGCATTGGATTTCAGCCCTCA            |
| SRR946955.5939405.1+   | GGCATTGGATTTCAGCCCTCA             |
| SRR946964.43257920.1-  | GCATTGGATTTCAGCCCTCA              |
| SRR946961.28750677.1+  | CATTGGATTTCAGCCCTCA               |
| SRR946959.65056747.2+  | ATTGGATTTCAGCCCTCA                |
| SRR946959.73130109.2+  | ATTGGATTTCAGCCCTCA                |
| SRR946959.77995769.2+  | ATTGGATTTCAGCCCTCA                |
| SRR946959.81666768.1-  | ATTGGATTTCAGCCCTCA                |
| SRR946960.40330220.1-  | ATTGGATTTCAGCCCTCA                |
| SRR946955.69121824.2+  | TGGATTTCAGCCCTCA                  |
| SRR946958.47746428.1-  | GATTTCAGCCCTCA                    |
| SRR946958.49561749.1-  | GATTTCAGCCCTCA                    |
| SRR946960.2414663.2+   | GATTTCAGCCCTCA                    |
| SRR946960.56936711.2+  | GATTTCAGCCCTCA                    |
| SRR946962.11807903.1+  | GATTTCAGCCCTCA                    |
| SRR946962.23989330.1+  | GATTTCAGCCCTCA                    |
| SRR946962.4256903.1+   | GATTTCAGCCCTCA                    |
| SRR946962.57337807.1+  | GATTTCAGCCCTCA                    |
| SRR946962.70463522.1+  | GATTTCAGCCCTCA                    |
| SRR946962.72210814.1+  | GATTTCAGCCCTCA                    |
| SRR946962.72476209.1+  | GATTTCAGCCCTCA                    |
| SRR946955.25344625.1-  | TTCAGCCCTCA                       |
| SRR946957.39160918.1-  | TTCAGCCCTCA                       |
| SRR946959.95583833.1+  | TTCAGCCCTCA                       |
| SRR946961.19671190.1-  | AGCCCTCA                          |
| SRR946961.37626057.1-  | AGCCCTCA                          |
| SRR946961.45962118.1-  | AGCCCTCA                          |
| SRR946961.85085209.1-  | AGCCCTCA                          |
| SRR946959.12813377.1-  | CTCA                              |
| SRR946959.32698026.1-  | CTCA                              |
| SRR946959.91786797.1-  | CTCA                              |
| SRR946960.104539216.2- | CTCA                              |
| SRR946960.7002808.2+   | CTCA                              |
| SRR946963.93499107.1-  | TCA                               |
| SRR946964.26443770.1-  | TCA                               |

consensus

GATGACATTTGAGCTGCAGGTCCATACAACCTGGCTGGGTGGCATTGGATTTCAGCCCTCA

|                        |                          |
|------------------------|--------------------------|
| SRR946960.15295326.1-  | T                        |
| SRR946961.4459041.1-   | T                        |
| SRR946955.72129725.2-  | TG                       |
| SRR946963.50779704.1+  | TGGAGA                   |
| SRR946955.1407940.1-   | TGGAGAGTT                |
| SRR946959.43540423.2+  | TGGAGAGTTG               |
| SRR946959.6283813.2+   | TGGAGAGTTG               |
| SRR946955.112874748.1- | TGGAGAGTTGCC             |
| SRR946958.97045906.2+  | TGGGGAGTTGCC             |
| SRR946955.44534172.1-  | TGGAGAGTTGCCT            |
| SRR946957.9360394.2+   | TGGGGAGGTGCCT            |
| SRR946959.45818324.2-  | TGGAGAGTTGCCTG           |
| SRR946964.65578922.2-  | TGGAGAGTTGCCTGG          |
| SRR946960.26708667.2-  | TGGAGAGTTGCCTGGAT        |
| SRR946960.5920316.1-   | TGGAGAGTTGCCTGGATC       |
| SRR946957.38019584.2+  | TGGAGAGTTGCCTGGATCT      |
| SRR946960.39066531.1-  | TGGAGAGTTGCCCGATCTGACA   |
| SRR946959.47282992.1+  | TGGAGAGTTGCCTGGATCTGACA  |
| SRR946960.81123918.1-  | TGGAGAGTTGCCTGGATCTGACA  |
| SRR946957.45164104.2-  | TGGAGAGTTGCCTGGATCTGACAT |
| SRR946959.13433807.1-  | TGGAGAGTTGCCTGGATCTGACAT |
| SRR946959.21075074.1-  | TGGAGAGTTGCCTGGATCTGACAT |
| SRR946959.76557600.1-  | TGGAGAGTTGCCTGGATCTGACAT |
| SRR946963.106067756.2+ | TGGAGAGTTGCCTGGATCTGACAT |
| SRR946963.20403013.2+  | TGGAGAGTTGCCTGGATCTGACAT |
| SRR946964.8249685.2+   | TGGAGAGTTGCCTGGATCTGACAT |

SRR946963.99457526.2- TGGAGAGTTGCCTGGATCTGACATT  
SRR946960.1810227.2+ TGGAGAGTTGCCTGGGTCTGGCATTG  
SRR946962.72246860.1+ TGGAGAGTTGCCTGGATCTGACATTG  
SRR946963.48241.1- TGGAGAGTTGCCTGGATCTGACATTG  
SRR946957.46436543.1+ TGGAGAGTTGCCCGGATCTGACATTGT  
SRR946964.43257920.1- TGGAGAGTTGCCTGGATCTGACATTGTGA  
SRR946961.28750677.1+ TGGAGAGTTGCCTGGATCTGACATTGTGAC  
SRR946959.65056747.2+ TGGAGAGTTGCCTGGATCTGACATTGTGACA  
SRR946959.73130109.2+ TGGAGAGTTGCCTGGATCTGACATTGTGACA  
SRR946959.77995769.2+ TGGAGAGTTGCCTGGATCTGACATTGTGACA  
SRR946959.81666768.1- TGGAGAGTTGCCTGGATCTGACATTGTGACA  
SRR946955.112096017.1+ TGGAGAGTTGCCTGGATCTGACATTGTGACAGGA  
SRR946962.11807903.1+ TGGAGAGTTGCCTGGATCTGACATTGTGACAGGAGG  
SRR946962.23989330.1+ TGGAGAGTTGCCTGGATCTGACATTGTGACAGGAGG  
SRR946962.4256903.1+ TGGAGAGTTGCCTGGATCTGACATTGTGACAGGAGG  
SRR946962.57337807.1+ TGGAGAGTTGCCTGGATCTGACATTGTGACAGGAGG  
SRR946962.70463522.1+ TGGAGAGTTGCCTGGATCTGACATTGTGACAGGAGG  
SRR946962.72210814.1+ TGGAGAGTTGCCTGGATCTGACATTGTGACAGGAGG  
SRR946962.72476209.1+ TGGAGAGTTGCCTGGATCTGACATTGTGACAGGAGG  
SRR946957.105630903.1+ TGGAGAGTTGCCTGGATCTGACATTGTGCCAGGGGGG  
SRR946959.95583833.1+ TGGAGAGTTGCCTGGATCTGACATTGTGACAGGAGGTG  
SRR946960.105947877.2- TGGAGAGTTGCCTGGATCTGACATTGTGACAGGAGGTGT  
SRR946960.98815412.1- TGGAGAGTTGCCTGGATCTGACATTGTGACAGGAGGTGT  
SRR946961.19671190.1- TGGAGAGTTGCCTGGATCTGACATTGTGACAGGAGGTGTCT  
SRR946961.37626057.1- TGGAGAGTTGCCTGGATCTGACATTGTGACAGGAGGTGTCT  
SRR946961.45962118.1- TGGAGAGTTGCCTGGATCTGACATTGTGACAGGAGGTGTCT  
SRR946961.85085209.1- TGGAGAGTTGCCTGGATCTGACATTGTGACAGGAGGTGTCT  
SRR946958.109621346.1- TGGAGAGTTGCCTGGATCTGACATTGTGACAGGAGGTGTCTCCC  
SRR946958.9738316.2- TGGAGAGTTGCCTGGATCTGACATTGTGACAGGAGGTGTCTCCC  
SRR946957.69847799.2+ TGGAGAGTTGCCTGGATCTGACATTGTGACAGGGGGGGGCTCCCC  
SRR946959.12813377.1- TGGAGAGTTGCCTGGATCTGACATTGTGACAGGAGGTGTCTCCCC  
SRR946959.32698026.1- TGGAGAGTTGCCTGGATCTGACATTGTGACAGGAGGTGTCTCCCC  
SRR946959.91786797.1- TGGAGAGTTGCCTGGATCTGACATTGTGACAGGAGGTGTCTCCCC  
SRR946963.93499107.1- TGGAGAGTTGCCTGGATCTGACATTGTGACAGGAGGTGTCTCCCCA  
SRR946964.26443770.1- TGGAGAGTTGCCTGGATCTGACATTGTGACAGGAGGTGTCTCCCCA  
SRR946960.90974710.1- TGGAGAGTTGCCTGGATCTGACATTGTGACAGGAGGTGTCTCCCCAA  
SRR946960.79233224.1- TGGAGAGTTGCCTGGATCTGACATTGTGACAGGAGGTGTCTCCCCAA  
SRR946960.25709152.2- TGGAGAGTTGCCTGGATCTGACATTGTGACAGGAGGTGTCTCTCCAAAT  
SRR946955.72441576.2+ TGGAGAGTTGCCTGGATCTGACATTGTGACAGGAGGTGTCTCCCCAAATG  
SRR946958.35361805.2- TGGAGAGTTGCCTGGATCTGACATTGTGACAGGAGGTGTCTCCCCAAATG  
SRR946957.117309917.2+ TGGAGAGTTGCCTGGATCTGACATTGTGACAGGAGGTGTCTCCCCAAATGGCAG  
SRR946960.91024589.1- TGGAGAGTTGCCTGGATCTGACATTGTGACAGGAGGTGTCTCCCCAAATGGCAG  
SRR946957.90080588.2- TGGAGAGTTGCCTGGATCTGACATTGTGACAGGAGGTGTCTCCCCAAATGGCAGCAT  
SRR946955.109130572.1+ TGGAGAGTTGCCTGGATCTGACATTGTGACAGGAGGTGGTCTCCCCAAATGGCAGCATCT  
SRR946958.100558939.2+ TGGAGAGTTGCCTGGATCTGACATTGTGACAGGAGGTGTCTCCCCAAATGGCAGCATCT  
SRR946955.20023076.2+ TGGAGAGTTGCCTGGATCTGACATTGTGACAGGAGGTGTCTCCCCAAATGGCAGCATCTA  
SRR946955.22777120.1+ TGGAGAGTTGCCTGGATCTGACATTGTGACAGGAGGTGTCTCCCCAAATGGCAGCATCTA  
SRR946955.25344625.1- TGGAGAGTTGCCTGGATCTGACATTGTGACAGGAGGTGTCTCCCCAAATGGCAGCATCTA  
SRR946955.5939405.1+ TGGAGAGTTGCCTGGATCTGACATTGTGACAGGAGGTGTCTCCCCAAATGGCAGCATCTA  
SRR946955.69121824.2+ TGGAGAGTTGCCTGGATCTGACATTGTGACAGGAGGTGTCTCCCCAAATGGCAGCATCTA  
SRR946955.99198518.1- TGGAGAGTTGCCTGGATCTGACATTGTGACAGGAGGTGTCTCCCCAAATGGCAGCATCTA  
SRR946957.12408494.1+ TGGAGAGTTGCCTGGATCTGACATTGTGACAGGAGGTGTCTCCCCAAATGGCAGCATCTA  
SRR946957.12900251.1- TGGAGAGTTGCCTGGATCTGACATTGTGACAGGAGGTGTCTCCCCAAATGGCAGCATCTA  
SRR946957.15683146.2- TGGAGAGTTGCCTGGATCTGACATTGTGACAGGAGGTGTCTCCCCAAATGGCAGCATCTA  
SRR946957.39160918.1- TGGAGAGTTGCCTGGATCTGACATTGTGACAGGAGGTGTCTCCCCAAATGGCAGCATCTA  
SRR946957.46227545.1+ TGGAGAGTTGCCTGGATCTGACATTGTGACAGGAGGTGTCTCCCCAAATGGCAGCATCTA  
SRR946957.65045800.1- TGGAGAGTTGCCTGGATCTGACATTGTGACAGGAGGTGTCTCCCCAAATGGCAGCATCTA  
SRR946957.89864013.2- TGGAGAGTTGCCTGGATCTGACATTGTGACAGGAGGTGTCTCCCCAAATGGCAGCATCTA  
SRR946958.21115458.2- TGGAGAGTTGCCTGGATCTGACATTGTGACAGGAGGTGTCTCCCCAAATGGCAGCATCTA  
SRR946958.47746428.1- TGGAGAGTTGCCTGGATCTGACATTGTGACAGGAGGTGTCTCCCCAAATGGCAGCATCTA  
SRR946958.49561749.1- TGGAGAGTTGCCTGGATCTGACATTGTGGCAGGAGGTGTCTCCCCAAATGGCAGCATCTA  
SRR946958.58370706.2+ TGGAGAGTTGCCTGGATCTGACATTGTGACAGGAGGTGTCTCCCCAAATGGCAGCAACTA  
SRR946958.66642230.1- TGGAGAGTTGCCTGGATCTGACATTGTGACAGGAGGTGTCTCCCCAAATGGCAGCATCTA  
SRR946960.102188235.1+ TGGAGAGTTGCCTGGATCTGACATTGTGACAGGAGGTGTCTCCCCAAATGGCAGCATCTA  
SRR946960.104539216.2- TGGAGAGTTGCCTGGATCTGACATTGTGACAGGAGGTGTCTCCCCAAATGGCAGCATCTA  
SRR946960.2414663.2+ TGGAGAGTTGCCTGGATCTGACATTGTGACAGGAGGTGTCTCCCCAAATGGCAGCATCTA  
SRR946960.40330220.1- TGGAGAGTTGCCTGGATCTGACATTGTGACAGGAGGTGTCTCCCCAAATGGCAGCATCTA  
SRR946960.4354927.2- TGGAGAGTTGCCTGGATCTGACATTGTGACAGGAGGTGTCTCCCCAAATGGCAGCATCTA  
SRR946960.56373046.2+ TGGAGAGTTGCCTGGATCTGACATTGTGACAGGAGGTGTCTCCCCAAATGGCAGCATCTA  
SRR946960.56936711.2+ TGGAGAGTTGCCTGGATCTGACATTGTGACAGGAGGTGTCTCCCCAAATGGCAGCATCTA  
SRR946960.57097995.1- TGGAGAGTTGCCTGGATCTGACATTGTGACAGGAGGTGTCTCCCCAAATGGCAGCATCTA  
SRR946960.7002808.2+ TGGAGAGTTGCCTGGATCTGACATTGTGACAGGAGGTGTCTCCCCAAATGGCAGCATCTA  
SRR946963.65512757.1- GGAGAGTTGCCTGGATCTGACATTGTGACAGGAGGTGTCTCCCCAAATG  
SRR946955.28401826.2+ GGAGAGTTGCCTGGATCTGACATTGTGACAGGAGGTGTCTCCCCAAATGGCAGCATCTA  
SRR946955.73984303.2- GAGAGTTGCCTGGATCTGACATTGTGACAGGAGGTGTCTCCCCAAATGGCAGCATCTA  
SRR946955.112096017.2- CATTGTGACAGGAGGTGTCTCCCCAAATGGCAGCATCTA  
SRR946959.43540423.1- AATGGCAGCATCTA  
SRR946959.6283813.1- AATGGCAGCATCTA  
SRR946955.72441576.1- GGCAGCATCTA  
SRR946955.109130572.2- CATCTA

consensus

TGGAGAGTTGCCTGGATCTGACATTGTGACAGGAGGTGTCTCCCCAAATGGCAGCATCTA

. : . : . : . : . :

|                        |                                                              |
|------------------------|--------------------------------------------------------------|
| SRR946955.69121824.2+  | CT                                                           |
| SRR946960.4354927.2-   | CT                                                           |
| SRR946957.12408494.1+  | CTT                                                          |
| SRR946955.99198518.1-  | CTTC                                                         |
| SRR946957.15683146.2-  | CTTC                                                         |
| SRR946957.89864013.2-  | CTTCT                                                        |
| SRR946957.46227545.1+  | CTTCTC                                                       |
| SRR946958.21115458.2-  | CTTCTCT                                                      |
| SRR946957.65045800.1-  | CTTCTCTgga                                                   |
| SRR946960.102188235.1+ | CTTTCTCTggaagtt                                              |
| SRR946957.12900251.1-  | CTTCTCTggaagttga                                             |
| SRR946960.56373046.2+  | CTTCTCTggaagttga                                             |
| SRR946958.58370706.2+  | CTTCTCTggaagttgaaa                                           |
| SRR946955.5939405.1+   | CTTCTCTggcagttgaaaa                                          |
| SRR946960.2414663.2+   | CTTCTCTggaagttgaaaa                                          |
| SRR946955.20023076.2+  | CTTCTCTggaagttgaaaaga                                        |
| SRR946955.73984303.2-  | CTTCTCTggaagttgaaaaga                                        |
| SRR946960.40330220.1-  | CTTCTCTggaagttgaaaagac                                       |
| SRR946955.28401826.2+  | CTTCTCTggaagttgaaaagactt                                     |
| SRR946958.47746428.1-  | CTTCTCTggaagttgaaaagacttcct                                  |
| SRR946958.49561749.1-  | CTTCTCTggaagttgaaaagacttcct                                  |
| SRR946960.56936711.2+  | CTTCTCTggaagttgaaaagacttcct                                  |
| SRR946955.25344625.1-  | CTTCTCTggaagttgaaaagacttcctct                                |
| SRR946957.39160918.1-  | CTTCTCTggaagttgaaaagacttcctct                                |
| SRR946959.43540423.1-  | CTTCTCTggaagttgaaaagacttcctctgcaggc                          |
| SRR946959.6283813.1-   | CTTCTCTggaagttgaaaagacttcctctgcaggc                          |
| SRR946960.104539216.2- | CTTCTCTggaagttgaaaagacttcctctgcaggct                         |
| SRR946960.7002808.2+   | CTTCTCTggaagttgaaaagaattcctccgcaggct                         |
| SRR946955.112096017.2- | CTTCTCTggaagttgaaaagacttcctctgcaggctcctt                     |
| SRR946955.22777120.1+  | CTTCTCTggaagttgaaaagacttcctctgcaggctcctt                     |
| SRR946955.109130572.2- | CTTCTCTggaagttgaaaagacttcctctgcaggctcctttgtcaggggtcatgctccaa |
| SRR946955.72441576.1-  | CTTCTCTggaagttgaaaagacttcctctgcaggctcctttgtcaggggtcatgctccaa |
| SRR946955.28401826.1-  | ttgaaaagacttcctctgcaggctcctttgtcagtggtcatgctccaa             |
| SRR946955.5939405.2-   | gacttcctctgcaggctcctttgtcaggggtcatgctccaa                    |
| SRR946955.69121824.1-  | gacttcctctgcaggctcctttgtcaggggtcatgctccaa                    |
| SRR946955.20023076.1-  | acttcctctgcaggctcctttgtcaggggtcatgctccaa                     |
| SRR946955.22777120.2-  | cctctgcaggctcctttgtcaggggtcatgctccaa                         |

consensus

CTTCTCTggaagttgaaaagacttcctctgcaggctcctttgtcaggggtcatgctccaa

---

## B. American crow (No. 3), exon 1, WGS data

- CAP3 alignment of WGS data spanning exon 1 (uppercase letters)

```

      .   :   .   :   .   :   .   :   .   :
SRR944633.99564964.1+   gtagctgcccaggtgtcagcaagactcagaaactgcagtGA
SRR944636.20310598.1-   gtagctgcccaggtgtcagcaagactcagaaactgcagtGA
SRR944632.64464026.2+   gtagctgcccaggtgtcagcaagactcagaaactgcagtGAT
SRR944639.30631809.1+   gtagctgcccaggtgtcagcaagactcagaaactgcagtGAT
SRR944636.15853340.1+   gtagctgcccaggtgtcagcaagactcagaaactgcagtGATGA
SRR944633.73901834.2-   gtagctgcccaggtgtcagcaagactcagaaactgcagtGATGAT
SRR944634.81565879.1+   gtagctgcccaggtgtcagcaagactcagaaactgcagtGATGATGG
SRR944638.33872132.1+   gtagctgcccaggtgtcagcaagactcagaaactgcagtGATGATGG
SRR944638.46339275.1+   gtagctgcccaggtgtcagcaagactcagaaactgcagtGATGATGG
SRR944637.65354816.1-   gtagctgcccaggtgtcagcaagactcagaaactgcagtGATGATGGTATGCT
SRR944634.74122007.1+   gtagctgcccaggtgtcagcaagactcagaaactgcagtGATGATGGTATGCTC
SRR944633.25313478.2+   gtagctgcccaggtgtcagcaagactcagaaactgcagtGATGATGGTATGCTCTTCT
SRR944633.26564911.1+   gtagctgcccaggtgtcagcaagactcagaaactgcagtGATGATGGTATGCTCTTCT
SRR944633.30133295.2-   gtagctgcccaggtgtcagcaagactcagaaactgcagtGATGATGGTATGCTCTTCT
SRR944633.34300351.2-   gtagctgcccaggtgtcagcaagactcagaaactgcagtGATGATGGTATGCTCTTCT
SRR944633.4272160.2-   gtagctgcccaggtgtcagcaagactcagaaactgcagtGATGATGGTATGCTCTTCT
SRR944633.57914021.2-   gtagctgcccaggtgtcagcaagactcagaaactgcagtGATGATGGTATGCTCTTCT
SRR944633.60527143.1-   gtagctgcccaggtgtcagcaagactcagaaactgcagtGATGATGGTATGCTCTTCT
SRR944633.67034951.2-   gtagctgcccaggtgtcagcaagactcagaaactgcagtGATGATGGTATGCTCTTCT
SRR944633.7837185.2-   gtagctgcccaggtgtcagcaagactcagaaactgcagtGATGATGGTATGCTCTTCT
SRR944634.24301483.2+   gtagctgcccaggtgtcagcaagactcagaaactgcagtGATGATGGTATGCTCTTCT
SRR944634.29623047.2+   gtagctgcccaggtgtcagcaagactcagaaactgcagtGATGATGGTATGCTCTTCT
SRR944634.34802299.1+   gtagctgcccaggtgtcagcaagactcagaaactgcagtGATGATGGTATGCTCTTCT
SRR944634.41644313.1-   gtagctgcccaggtgtcagcaagactcagaaactgcagtGATGATGGTATGCTCTTCT
SRR944634.46910015.1+   gtagctgcccaggtgtcagcaagactcagaaactgcagtGATGATGGTATGCTCTTCT
SRR944634.66207389.2+   gtagctgcccaggtgtcagcaagactcagaaactgcagtGATGATGGTATGCTCTTCT
SRR944634.77968149.2+   gtagctgcccaggtgtcagcaagactcagaaactgcagtGATGATGGTATGCTCTTCT
SRR944634.84693929.1+   gtagctgcccaggtgtcagcaagactcagaaactgcagtGATGATGGTATGCTCTTCT
SRR944635.2300460.1-   gtagctgcccaggtgtcagcaagactcagaaactgcagtGATGATGGTATGCTCTTCT
SRR944635.40788816.2-   gtagctgcccaggtgtcagcaagactcagaaactgcagtGATGATGGTATGCTCTTCT
SRR944635.71478536.1-   gtagctgcccaggtgtcagcaagactcagaaactgcagtGATGATGGTATGCTCTTCT
SRR944635.81760264.2-   gtagctgcccaggtgtcagcaagactcagaaactgcagtGATGATGGTATGCTCTTCT
SRR944635.81781524.1-   gtagctgcccaggtgtcagcaagactcagaaactgcagtGATGATGGTATGCTCTTCT
SRR944635.93226745.1-   gtagctgcccaggtgtcagcaagactcagaaactgcagtGATGATGGTATGCTCTTCT
SRR944637.21642352.1-   gtagctgcccaggtgtcagcaagactcagaaactgcagtGATGATGGTATGCTCTTCT
SRR944637.26459078.2-   gtagctgcccaggtgtcagcaagactcagaaactgcagtGATGATGGTATGCTCTTCT
SRR944637.34494868.2-   gtagctgcccaggtgtcagcaagactcagaaactgcagtGATGATGGTATGCTCTTCT
SRR944637.37249548.2-   gtagctgcccaggtgtcagcaagactcagaaactgcagtGATGATGGTATGCTCTTCT
SRR944637.47526072.2-   gtagctgcccaggtgtcagcaagactcagaaactgcagtGATGATGGTATGCTCTTCT
SRR944637.64118957.1-   gtagctgcccaggtgtcagcaagactcagaaactgcagtGATGATGGTATGCTCTTCT
SRR944637.69311163.1+   gtagctgcccaggtgtcagcaagactcagaaactgcagtGATGATGGTATGCTCTTCT
SRR944632.99118942.1+   tagctgcccaggtgtcagcaagactcagaaactgcagtGATGATGGTGA
SRR944634.13125669.1+   tagctgcccaggtgtcagcaagactcagaaactgcagtGATGATGGTATGCTCTTCT
SRR944637.1220408.2+   tagctgcccaggtgtcagcaagactcagaaactgcagtGATGATGGTATGCTCTTCT
SRR944637.25240257.2+   tagctgcccaggtgtcagcaagactcagaaactgcagtGATGATGGTATGCTCTTCT
SRR944638.77644039.2-   agctgcccaggtgtcagcaagactcagaaactgcagtGATGATGGTGA
SRR944633.31142104.1-   tgcccaggtgtcagcaagactcagaaactgcagtGATGATGGTATGCTCTTCT
SRR944633.99564964.2-   tgcccaggtgtcagcaagactcagaaactgcagtGATGATGGTATGCTCTTCT
SRR944634.12799848.1+   tgcccaggtgtcagcaagactcagaaactgcagtGATGATGGTATGCTCTTCT
SRR944634.51759179.2-   tgcccaggtgtcagcaagactcagaaactgcagtGATGATGGTATGCTCTTCT
SRR944634.80853444.1+   tgcccaggtgtcagcaagactcagaaactgcagtGATGATGGTATGCTCTTCT
SRR944636.59987069.2+   gcccaggtgtcagcaagactcagaaactgcagtGATGATGGTATGCT
SRR944636.91570116.2+   ccccaggtgtcagcaagactcagaaactgcagtGATGATGGTATGCT
SRR944632.115399270.2-   cccgaggtgtcagcaagactcagaaactgcagtGATGATGGTATGCTC
SRR944634.77387431.1+   cccgaggtgtcagcaagactcagaaactgcagtGATGATGGTATGCTCTTCT
SRR944630.38900498.2-   ccgaggtgtcagcaagactcagaaactgcagtGATGATGGTATGCTCT
SRR944636.19312528.1+   ccgaggtgtcagcaagactcagaaactgcagtGATGATGGTATGCTCT
SRR944636.64995817.1+   ccgaggtgtcagcaagactcagaaactgcagtGATGATGGTATGCTCT
SRR944636.90108431.1+   ccgaggtgtcagcaagactcagaaactgcagtGATGATGGTATGCTCT
SRR944632.41752938.1+   gaggtgtcagcaagactcagaaactgcagtGATGATGGTATGCTCTTCT
SRR944638.56650498.2+   gaggtgtcagcaagactcagaaactgcagtGATGATGGTATGCTCTTCT
SRR944638.85031089.2+   gaggtgtcagcaagactcagaaactgcagtGATGATGGTATGCTCTTCT
SRR944638.86199803.1-   gaggtgtcagcaagactcagaaactgcagtGATGATGGTATGCTCTTCT
SRR944633.18236212.1+   gaggtgtcagcaagactcagaaactgcagtGATGATGGTATGCTCTTCT
SRR944634.20628373.2+   gaggtgtcagcaagactcagaaactgcagtGATGATGGTATGCTCTTCT
SRR944634.70964299.1+   aggtgtcagcaagactcagaaactgcagtGATGATGGTATGCTCTTCT
SRR944635.7872034.1-   gtgtcagcaagactcagaaactgcagtGATGATGGTATGCTCTTCT
SRR944633.98128369.1+   tgtcagcaagactcagaaactgcagtGATGATGGTATGCTCTTCT
SRR944632.81135265.1+   gtcagcaagactcagaaactgcagtGATGATGGTATGCTCTTCT
SRR944635.49513625.1-   gtcagcaagactcagaaactgcagtGATGATGGTATGCTCTTCT
SRR944633.99195671.2+   tcagcaagactcagaaactgcagtGATGATGGTATGCTCTTCT
SRR944635.61730673.1-   tcagcaagactcagaaactgcagtGATGATGGTATGCTCTTCT
SRR944634.74122007.2-   agcaagactcagaaactgcagtGATGATGGTATGCTCTTCT
SRR944634.66207389.1-   gcaagactcagaaactgcagtGATGATGGTATGCTCTTCT
SRR944634.81565879.2-   gcaagactcagaaactgcagtGATGATGGTATGCTCTTCT

```

SRR944630.84608148.1-  
 SRR944638.25047412.1-  
 SRR944639.64659294.1+  
 SRR944635.40200896.1-  
 SRR944636.16964149.1+  
 SRR944636.4351696.1+  
 SRR944636.64049083.1+  
 SRR944632.111782190.2+  
 SRR944632.74211923.2+  
 SRR944632.81005069.1+  
 SRR944632.99936685.2+  
 SRR944637.11188729.2+  
 SRR944634.54009543.2+  
 SRR944636.96397436.2-  
 SRR944630.46900203.2-  
 SRR944639.12060957.1+  
 SRR944632.47334264.2+  
 SRR944637.16414866.2+  
 SRR944637.4122469.2+  
 SRR944639.65025889.2+  
 SRR944635.52001870.1-  
 SRR944633.40489199.2+  
 SRR944636.53558935.1+  
 SRR944632.2401542.1+  
 SRR944638.2779174.1+  
 SRR944638.63373416.1+  
 SRR944638.7686562.1+  
 SRR944631.21892125.2-  
 SRR944631.31991311.2-  
 SRR944631.38205968.2-  
 SRR944631.40005968.2-  
 SRR944631.49279245.2-  
 SRR944634.94919320.2+  
 SRR944632.72360615.1+  
 SRR944634.61033746.1+  
 SRR944639.90324502.1+  
 SRR944633.82191784.1+  
 SRR944634.46910015.2-  
 SRR944632.28355724.1+  
 SRR944638.51612977.1+  
 SRR944638.67869952.1+  
 SRR944634.63040457.2+  
 SRR944634.77968149.1-  
 SRR944638.16884164.2+  
 SRR944633.25313478.1-  
 SRR944634.34545057.2+  
 SRR944638.13663328.2+  
 SRR944632.13727313.2+  
 SRR944633.90674241.2+  
 SRR944634.29623047.1-  
 SRR944634.3508483.2+  
 SRR944635.49727187.1+

caagactcagaaactgcagtgATGATGGTGATGCTCTTCT  
 caagactcagaaactgcagtgATGATGGTGATGCTCTTCT  
 caagactcagaaactgcagtgATGATGGTGATGCTCTTCT  
 gactcagaaactgcagtgATGATGGTGATGCTCTTCT  
 ctcaaaactgcagtgATGATGGTGATGCTCTTCT  
 ctcaaaactgcagtgATGATGGTGATGCTCTTCT  
 ctcaaaactgcagtgATGATGGTGATGCTCTTCT  
 tcagaaactgcagtgATGATGGTGATGCTCTTCT  
 tcagaaactgcagtgATGATGGTGATGCTCTTCT  
 tcagaaactgcagtgATGATGGTGATGCTCTTCT  
 tcagaaactgcagtgATGATGGTGATGCTCTTCT  
 tcagaaactgcagtgATGATGGTGATGCTCTTCT  
 cagaaactgcagtgATGATGGTGATGCTCTTCT  
 cagaaactgcagtgATGATGGTGATGCTCTTCT  
 gaaactgcagtgATGATGGTGATGCTCTTCT  
 gaaactgcagtgATGATGGTGATGCTCTTCT  
 aaactgcagtgATGATGGTGATGCTCTTCT  
 aaactgcagtgATGATGGTGATGCTCTTCT  
 aactgcagtgATGATGGTGATGCTCTTCT  
 ctgcagtgATGATGGTGATGCTCTTCT  
 gcagtgATGAGGGTGATGCTCTTCT  
 cagtgATGATGGTGATGCTCTTCT  
 gtgATGATGGTGATGCTCTTCT  
 tgATGATGGTGATGCTCTTCT  
 gATGATGGTGATGCTCTTCT  
 gATGATGGTGATGCTCTTCT  
 gATGATGGTGATGCTCTTCT  
 TGATGGTGATGCTCTTCT  
 TGATGGTGATGCTCTTCT  
 TGATGGTGATGCTCTTCT  
 TGATGGTGATGCTCTTCT  
 TGATGGTGATGCTCTTCT  
 GATGGTGATGCTCTTCT  
 ATGGTGATGCTCTTCT  
 ATGGTGATGCTCTTCT  
 ATGGTGATGCTCTTCT  
 TGGTGATGCTCTTCT  
 TGGTGATGCTCTTCT  
 GGTGATGCTCTTCT  
 TGATGCTCTTCT  
 TGATGCTCTTCT  
 GATGCTCTTCT  
 GATGCTCTTCT  
 ATGCTCTTCT  
 TGCTCTTCT  
 GCTCTTCT  
 GCTCTTCT  
 TCTTCT  
 TCTTCT  
 CTTCT  
 CTTCT  
 CTTCT  
 T

consensus

gtagctgccccgaggtgtcagcaagactcagaaactgcagtgATGATGGTGATGCTCTTCT

SRR944633.7837185.2-  
 SRR944632.81135265.1+  
 SRR944633.60527143.1-  
 SRR944634.84693929.1+  
 SRR944630.84608148.1-  
 SRR944638.25047412.1-  
 SRR944639.64659294.1+  
 SRR944633.26564911.1+  
 SRR944633.67034951.2-  
 SRR944635.40788816.2-  
 SRR944635.71478536.1-  
 SRR944635.93226745.1-  
 SRR944636.16964149.1+  
 SRR944636.4351696.1+  
 SRR944636.64049083.1+  
 SRR944632.111782190.2+  
 SRR944632.74211923.2+  
 SRR944632.81005069.1+  
 SRR944632.99936685.2+  
 SRR944634.34802299.1+  
 SRR944636.96397436.2-  
 SRR944637.21642352.1-  
 SRR944634.41644313.1-  
 SRR944630.46900203.2-  
 SRR944637.34494868.2-  
 SRR944639.12060957.1+  
 SRR944632.47334264.2+  
 SRR944633.4272160.2-

CA  
 CAGG  
 CAGGGAT  
 CAGGGATC  
 CAGGGATCA  
 CAGGGATCA  
 CAGGGATCA  
 CAGGGATCAA  
 CAGGGATCAAGA  
 CAGGGATCAAGAG  
 CAGGGATCAAGAG  
 CAGGGATCAAGAG  
 CAGGGATCAAGAGA  
 CAGGGATCAAGAGA  
 CAGGGATCAAGAGA  
 CAGGGATCAAGAGAA  
 CAGGGATCAAGAGAA  
 CAGGGATCAAGAGAA  
 CAGGGATCAAGAGAA  
 CAGGGATCAAGAGAAAT  
 CAGGGATCAAGAGAAAT  
 CAGGGATCAAGAGAAAT  
 CAGGGATCAAGAGAAATG  
 CAGGGATCAAGAGAAATGC  
 CAGGGATCAAGAGAAATGC  
 CAGGGATCAAGAGAAATGC  
 CAGGGATCAAGAGAAATGC  
 CAGGGATCAAGAGAAATGC  
 CAGGGATCAAGAGAAATGC



SRR944634.66207389.2+ CAGGGATCAAGAGAATGCT  
SRR944634.77968149.2+ CAGGGATCAAGAGAATGCT  
SRR944634.46910015.1+ CAGGGATCAAGAGAATGCTC  
SRR944635.81781524.1- CAGGGATCAAGAGAATGCTC  
SRR944637.26459078.2- CAGGGATCAAGAGAATGCTC  
SRR944639.65025889.2+ CAGGGATCAAGAGAATGCTCTT  
SRR944637.37249548.2- CAGGGATCAAGAGAATGCTCTTCC  
SRR944634.29623047.2+ CAGGGATCAAGAGAATGCTCTTCC  
SRR944633.34300351.2- CAGGGATCAAGAGAATGCTCTTCCCT  
SRR944636.53558935.1+ CAGGGATCAAGAGAATGCTCTTCCCT  
SRR944637.64118957.1- CAGGGATCAAGAGAATGCTCTTCCCT  
SRR944632.2401542.1+ CAGGGATCAAGAGAATGCTCTTCCCT  
SRR944633.30133295.2- CAGGGATCAAGAGAATGCTCTTCCCT  
SRR944633.57914021.2- CAGGGATCAAGAGAATGCTCTTCCCT  
SRR944635.2300460.1- CAGGGATCAAGAGAATGCTCTTCCCT  
SRR944635.81760264.2- CAGGGATCAAGAGAATGCTCTTCCCT  
SRR944638.2779174.1+ CAGGGATCAAGAGAATGCTCTTCCCTTTG  
SRR944638.63373416.1+ CAGGGATCAAGAGAATGCTCTTCCCTTTG  
SRR944638.7686562.1+ CAGGGATCAAGAGAATGCTCTTCCCTTTG  
SRR944639.90324502.1+ CAGGGATCAAGAGAATGCTCTTCCCTTTGT  
SRR944631.21892125.2- CAGGGATCAAGAGAATGCTCTTCCCTTTGT  
SRR944631.31991311.2- CAGGGATCAAGAGAATGCTCTTCCCTTTGT  
SRR944631.38205968.2- CAGGGATCAAGAGAATGCTCTTCCCTTTGT  
SRR944631.40005968.2- CAGGGATCAAGAGAATGCTCTTCCCTTTGT  
SRR944631.49279245.2- CAGGGATCAAGAGAATGCTCTTCCCTTTGT  
SRR944632.72360615.1+ CAGGGATCAAGAGAATGCTCTTCCCTTTGTCC  
SRR944632.28355724.1+ CAGGGATCAAGAGAATGCTCTTCCCTTTGTCC  
SRR944633.25313478.2+ CAGGGATCAAGAGAATGCTCTTCCCTTTGTCC  
SRR944634.24301483.2+ CAGGGATCAAGAGAATGCTCTTCCCTTTGTCC  
SRR944637.25240257.2+ CAGGGATCAAGAGAATGCTCTTCCCTTTGTACTCC  
SRR944638.51612977.1+ CAGGGATCAAGAGAATGCTCTTCCCTTTGTCC  
SRR944638.67869952.1+ CAGGGATCAAGAGAATGCTCTTCCCTTTGTCC  
SRR944637.47526072.2- CAGTATCAAGAGAATGCTCTTCCCTTTGTCC  
SRR944637.69311163.1+ CAGGGATCAAGAGAATGCTCTTCCCTTTGTCC  
SRR944638.16884164.2+ CAGGGATCAAGAGAATGCTCTTCCCTTTGTCC  
SRR944634.13125669.1+ CAGGGATCAAGAGAATGCTCTTCCCTTTGTCC  
SRR944637.1220408.2+ CAGGGATCAAGAGAATGCTCTTCCCTTTGTCC  
SRR944638.13663328.2+ CAGGGATCAAGAGAATGCTCTTCCCTTTGTCC  
SRR944632.13727313.2+ CAGGGATCAAGAGAATGCTCTTCCCTTTGTCC  
SRR944633.31142104.1- CAGGGATCAAGAGAATGCTCTTCCCTTTGTCC  
SRR944633.99564964.2- CAGGGATCAAGAGAATGCTCTTCCCTTTGTCC  
SRR944634.12799848.1+ CAGGGATCAAGAGAATGCTCTTCCCTTTGTCC  
SRR944634.51759179.2- CAGGGATCAAGAGAATGCTCTTCCCTTTGTCC  
SRR944634.80853444.1+ CAGGGATCAAGAGAATGCTCTTCCCTTTGTCC  
SRR944634.77387431.1+ CAGGGATCAAGAGAATGCTCTTCCCTTTGTCC  
SRR944631.31144036.2+ CAGGGATCAAGAGAATGCTCTTCCCTTTGTCC  
SRR944631.6910189.1+ CAGGGATCAAGAGAATGCTCTTCCCTTTGTCC  
SRR944636.11342958.1+ CAGGGATCAAGAGAATGCTCTTCCCTTTGTCC  
SRR944636.75478208.1+ CAGGGATCAAGAGAATGCTCTTCCCTTTGTCC  
SRR944636.84196590.2+ CAGGGATCAAGAGAATGCTCTTCCCTTTGTCC  
SRR944636.95597625.1+ CAGGGATCAAGAGAATGCTCTTCCCTTTGTCC  
SRR944633.18236212.1+ CAGGGATCAAGAGAATGCTCTTCCCTTTGTCC  
SRR944634.20628373.2+ CAGGGATCAAGAGAATGCTCTTCCCTTTGTCC  
SRR944634.70964299.1+ CAGGGATCAAGAGAATGCTCTTCCCTTTGTCC  
SRR944635.7872034.1- CAGGGATCAAGAGAATGCTCTTCCCTTTGTCC  
SRR944633.98128369.1+ CAGGGATCAAGAGAATGCTCTTCCCTTTGTCC  
SRR944635.49513625.1- CAGGGATCAAGAGAATGCTCTTCCCTTTGTCC  
SRR944633.99195671.2+ CAGGGATCAAGAGAATGCTCTTCCCTTTGTCC  
SRR944635.61730673.1- CAGGGATCAAGAGAATGCTCTTCCCTTTGTCC  
SRR944634.74122007.2- CAGGGATCAAGAGAATGCTCTTCCCTTTGTCC  
SRR944634.66207389.1- CAGGGATCAAGAGAATGCTCTTCCCTTTGTCC  
SRR944634.81565879.2- CAGGGATCAAGAGAATGCTCTTCCCTTTGTCC  
SRR944633.25313478.1- CAGGGATCAAGAGAATGCTCTTCCCTTTGTCC  
SRR944633.40489199.2+ CAGGGATCAAGAGAATGCTCTTCCCTTTGTCC  
SRR944633.82191784.1+ CAGGGATCAAGAGAATGCTCTTCCCTTTGTCC  
SRR944633.90674241.2+ CAGGGATCAAGAGAATGCTCTTCCCTTTGTCC  
SRR944634.29623047.1- CGGGATCAAGAGAATGCTCTTCCCTTTGTCC  
SRR944634.34545057.2+ CAGGGATCAAGAGAATGCTCTTCCCTTTGTCC  
SRR944634.3508483.2+ CAGGGATCAAGAGAATGCTCTTCCCTTTGTCC  
SRR944634.46910015.2- CAGGGATCAAGAGAATGCTCTTCCCTTTGTCC  
SRR944634.54009543.2+ CAGGGATCAAGAGAATGCTCTTCCCTTTGTCC  
SRR944634.61033746.1+ CAGGGATCAAGAGAATGCTCTTCCCTTTGTCC  
SRR944634.63040457.2+ CAGGGATCAAGAGAATGCTCTTCCCTTTGTCC  
SRR944634.77968149.1- CAGGGATCAAGAGAATGCTCTTCCCTTTGTCC  
SRR944634.94919320.2+ CAGGGATCAAGAGAATGCTCTTCCCTTTGTCC  
SRR944635.40200896.1+ CAGGGATCAAGAGAATGCTCTTCCCTTTGTCC  
SRR944635.49727187.1+ CAGGGATCAAGAGAATGCTCTTCCCTTTGTCC  
SRR944635.52001870.1- CAGGGATCAAGAGAATGCTCTTCCCTTTGTCC  
SRR944637.11188729.2+ CAGGGATCAAGAGAATGCTCTTCCCTTTGTCC  
SRR944637.16414866.2+ CAGGGATCAAGAGAATGCTCTTCCCTTTGTCC  
SRR944637.4122469.2+ CAGGGATCAAGAGAATGCTCTTCCCTTTGTCC  
SRR944636.31304490.2- GGGATCAAGAGAATGCTCTTCCCTTTGTCC  
SRR944638.3016663.1- GGGATCAAGAGAATGCTCTTCCCTTTGTCC  
SRR944638.52827038.2- GGGATCAAGAGAATGCTCTTCCCTTTGTCC

SRR944638.60189056.2- GGGATCAAGAGAATGCTCTTCCCTCTTGTTCCTCCCATGCTTTTGTCTG  
 SRR944634.69071785.1+ GGGATCAAGAGAATGCTCTTCCCTCTTGTTCCTCCCATGCTTTTGTCTGGCCAGCTTG  
 SRR944635.30275578.1- GGGATCAAGAGAATGCTCTTCCCTCTTGTTCCTCCCATGCTTTTGTCTGGCCAGCTTG  
 SRR944634.24301483.1- GGATCAAGAGAATGCTCTTCCCTCTTCTTCCCTCCCATGCTTTTGTCTGGCCAGCTTG  
 SRR944637.20928485.2+ GGATCAAGAGAATGCTCTTCCCTCTTGTTCCTCCCATGCTTTTGTCTGGCCAGCTTG  
 SRR944639.78391931.1- TCAAGAGAATGCTCTTCCCTCTTGTTCCTCCCATGCTTTTGTCTGGCCA  
 SRR944630.42215617.1+ CAAGAGAATGCTCTTCCCTCTTGTTCCTCCCATGCTTTTGTCTGGCCAG  
 SRR944630.55209506.2+ CAAGAGAATGCTCTTCCCTCTTGTTCCTCCCATGCTTTTGTCTGGCCAG  
 SRR944636.34194314.1- CAAGAGAATGCTCTTCCCTCTTGTTCCTCCCATGCTTTTGTCTGGCCAG  
 SRR944638.40971872.2+ CAAGAGAATGCTCTTCCCTCTTGTTCCTCCCATGCTTTTGTCTGGCCAG  
 SRR944637.50549606.2+ CAAGAGAATGCTCTTCCCTCTTGTTCCTCCCATGCTTTTGTCTGGCCAG  
 SRR944639.57379420.1+ CAAGAGAATGCTCTTCCCTCTTGTTCCTCCCATGCTTTTGTCTGGCCAG  
 SRR944634.71474468.2+ CAAGAGAATGCTCTTCCCTCTTGTTCCTCCCATGCTTTTGTCTGGCCAGCTTG  
 SRR944639.85904287.1- AAGAGAATGCTCTTCCCTCTTGTTCCTCCCATGCTTTTGTCTGGCCAGC  
 SRR944632.105719955.1- AGAGAATGCTCTTCCCTCTTGTTCCTCCCATGCTTTTGTCTGGCCAGCT  
 SRR944633.98416869.1- AGAATGCTCTTCCCTCTTGTTCCTCCCATGCTTTTGTCTGGCCAGCTTG  
 SRR944633.98416869.2+ AGAATGCTCTTCCCTCTTGTTCCTCCCATGCTTTTGTCTGGCCAGCTTG  
 SRR944633.22219140.2+ GAATGCTCTTCCCTCTTGTTCCTCCCATGCTTTTGTCTGGCCAGCTTG  
 SRR944636.85657916.2+ AATGCTCTTCCCTCTTGTTCCTCCCATGCTTTTGTCTGGCCAGCTTG  
 SRR944633.54109791.1+ ATGCTCTTCCCTCTTGTTCCTCCCATGCTTTTGTCTGGCCAGCTTG  
 SRR944634.20628373.1- ATGCTCTTCCCTCTTGTTCCTCCCATGCTTTTGTCTGGCCAGCTTG  
 SRR944633.99195671.1- TGCTCTTCCCTCTTGTTCCTCCCATGCTTTTGTCTGGCCAGCTTG  
 SRR944636.85623294.1+ TGCTCTTCCCTCTTGTTCCTCCCATGCTTTTGTCTGGCCAGCTTG  
 SRR944637.36954774.1+ TGCTCTTCCCTCTTGTTCCTCCCATGCTTTTGTCTGGCCAGCTTG  
 SRR944637.48405569.1+ TGCTCTTCCCTCTTGTTCCTCCCATGCTTTTGTCTGGCCAGCTTG  
 SRR944637.67596548.1+ TGCTCTTCCCTCTTGTTCCTCCCATGCTTTTGTCTGGCCAGCTTG  
 SRR944639.70391911.2+ GCTCTTCCCTCTTGTTCCTCCCATGCTTTTGTCTGGCCAGCTTG  
 SRR944631.8853804.1+ CTTCCCTCTTGTTCCTCCCATGCTTTTGTCTGGCCAGCTTG  
 SRR944637.20349171.2+ CTTCCCTCTTGTTCCTCCCATGCTTTTGTCTGGCCAGCTTG  
 SRR944633.94174440.1+ TTCCCTCTTGTTCCTCCCATGCTTTTGTCTGGCCAGCTTG  
 SRR944639.795176.2+ TTCCCTCTTGTTCCTCCCATGCTTTTGTCTGGCCAGCTTG  
 SRR944634.36413891.2+ TCTTGTTCCTCCCATGCTTTTGTCTGGCCAGCTTG  
 SRR944636.80493380.2- TCTTGTTCCTCCCATGCTTTTGTCTGGCCAGCTTG  
 SRR944639.1190717.2+ TGTTCCCTCCCATGCTTTTGTCTGGCCAGCTTG  
 SRR944632.124814170.1- GTTCCCTCCCATGCTTTTGTCTGGCCAGCTTG  
 SRR944636.12772580.1+ TTCCTCCCATGCTTTTGTCTGGCCAGCTTG  
 SRR944636.68422628.1+ TTCCTCCCATGCTTTTGTCTGGCCAGCTTG  
 SRR944637.42475624.1+ TCCTCCCATGCTTTTGTCTGGCCAGCTTG  
 SRR944632.103969568.1+ CCCATGCTTTTGTCTGGCCAGCTTG  
 SRR944633.37543341.1+ CCATGCTTTTGTCTGGCCAGCTTG  
 SRR944639.51517071.1+ CCATGCTTTTGTCTGGCCAGCTTG  
 SRR944637.29882792.1- GCTTTTGTCTGGCCAGCTTG  
 SRR944639.4540333.1+ GCTTTTGTCTGGCCAGCTTG  
 SRR944634.95930937.1+ CTTTTGTTCTGGCCAGCTTG  
 SRR944634.96353591.2+ CTTTTGTTCTGGCCAGCTTG  
 SRR944631.20498242.2+ TTTTGTCTGGCCAGCTTG  
 SRR944631.36807333.2+ TTTTGTCTGGCCAGCTTG  
 SRR944631.50529730.2+ TTTTGTCTGGCCAGCTTG  
 SRR944637.48110385.1- TTTTGTCTGGCCAGCTTG  
 SRR944639.46024088.2+ TTTGTTCTGGCCAGCTTG  
 SRR944639.11696087.2+ TTGTTCTGGCCAGCTTG  
 SRR944631.10860893.1+ TTCTGGCCAGCTTG  
 SRR944631.50426033.1+ TTCTGGCCAGCTTG  
 SRR944635.19297688.2+ TCTGGCCAGCTTG  
 SRR944632.81552681.2- CTGGCCAGCTTG  
 SRR944633.33685071.2+ TGGCCAGCTTG  
 SRR944636.87173253.2- CAGCTTG  
 SRR944639.22522669.2+ CAGCTTG  
 SRR944639.60415629.2+ CAGCTTG  
 SRR944632.98185584.2+ AGCTTG  
 SRR944634.56993620.1+ AGCTTG  
 SRR944636.92678193.1- AGCTTG  
 SRR944639.56680004.1+ GCTTG  
 SRR944633.49669968.2+ CTTG  
 SRR944633.82191784.2- TCC  
 SRR944634.54009543.1- TTC  
 SRR944634.61033746.2- TTC  
 SRR944638.25394220.1+ TTG  
 SRR944638.83126803.1+ TTG  
 SRR944635.75573623.2- CG  
 SRR944634.94919320.1- C  
 SRR944635.8277624.2- G

consensus

CAGGGATCAAGAGAATGCTCTTCCCTCTTGTTCCTCCCATGCTTTTGTCTGGCCAGCTTG

SRR944636.85657916.2+  
 SRR944635.40200896.1-  
 SRR944636.85623294.1+  
 SRR944639.70391911.2+  
 SRR944637.11188729.2+  
 SRR944634.54009543.2+  
 SRR944631.8853804.1+  
 SRR944633.98416869.1-

CA  
 CAC  
 CACC  
 CACCT  
 CACCTC  
 CACCTCC  
 CACCTCCA  
 CACCTCCA

SRR944633.98416869.2+ CACCTCCA  
SRR944639.795176.2+ CACCTCCAC  
SRR944637.16414866.2+ CACCTCCACT  
SRR944635.52001870.1- CCCCTCCACTG  
SRR944637.4122469.2+ CACCTCCACTG  
SRR944633.40489199.2+ CACCTCCACTGCT  
SRR944636.80493380.2- CACCTCCACTGCT  
SRR944639.1190717.2+ CACCTCCACTGCTGCG  
SRR944632.124814170.1- CACCTCCACTGCTGCGT  
SRR944636.12772580.1+ CACCTCCACTGCTGCGTT  
SRR944636.68422628.1+ CACCTCCACTGCTGCGTTT  
SRR944634.94919320.2+ CACCTCCACTGCTGCGTTTCC  
SRR944632.103969568.1+ CCCCTCCACTGCTGCGTTTCC  
SRR944634.46910015.2- CACCTCCACTGCTGCGTTTCC  
SRR944634.61033746.1+ CACCTCCACTGCTGCGTTTCC  
SRR944639.51517071.1+ CACCTCCACTGCTGCGTTTCC  
SRR944633.82191784.1+ CACCTCCACTGCTGCGTTTCC  
SRR944634.77968149.1- CCCCTCCACTGCTGCGTTTCC  
SRR944639.4540333.1+ CACCTCCACTGCTGCGTTTCC  
SRR944634.63040457.2+ CACCTCCACTGCTGCGTTTCC  
SRR944631.20498242.2+ CACCTCCACTGCTGCGTTTCC  
SRR944631.36807333.2+ CACCTCCACTGCTGCGTTTCC  
SRR944631.50529730.2+ CACCTCCACTGCTGCGTTTCC  
SRR944633.25313478.1- CACCTCCACTGCTGCGTTTCC  
SRR944639.46024088.2+ CACCTCCACTGCTGCGTTTCC  
SRR944634.34545057.2+ CACCTCCACTGCTGCGTTTCC  
SRR944639.11696087.2+ CACCTCCACTGCTGCGTTTCC  
SRR944633.90674241.2+ CACCTCCACTGCTGCGTTTCC  
SRR944637.20928485.2+ CACCTCCACTGCTGCGTTTCC  
SRR944631.10860893.1+ CACCTCCACTGCTGCGTTTCC  
SRR944631.50426033.1+ CACCTCCACTGCTGCGTTTCC  
SRR944634.29623047.1- CACCTCCACTGCTGCGTTTCC  
SRR944634.3508483.2+ CACCTCCACTGCTGCGTTTCC  
SRR944632.81552681.2- CCCCTCCACTGCTGCGTTTCC  
SRR944635.49727187.1+ CACCTCCACTGCTGCGTTTCC  
SRR944635.30275578.1- CCCCTCCACTGCTGCGTTTCC  
SRR944634.69071785.1+ CACCTCCACTGCTGCGTTTCC  
SRR944636.87173253.2- CCCCTCCACTGCTGCGTTTCC  
SRR944639.22522669.2+ CACCTCCACTGCTGCGTTTCC  
SRR944639.60415629.2+ CACCTCCACTGCTGCGTTTCC  
SRR944632.98185584.2+ CACCTCCACTGCTGCGTTTCC  
SRR944634.24301483.1- CCCCTCCACTGCTGCGTTTCC  
SRR944636.92678193.1+ CACCTCCACTGCTGCGTTTCC  
SRR944639.56680004.1+ CACCTCCACTGCTGCGTTTCC  
SRR944638.25394220.1+ CACCTCCACTGCTGCGTTTCC  
SRR944638.83126803.1+ CACCTCCACTGCTGCGTTTCC  
SRR944634.71474468.2+ CACCTCCACTGCTGCGTTTCC  
SRR944633.22219140.2+ CACCTCCACTGCTGCGTTTCC  
SRR944633.54109791.1+ CACCTCCACTGCTGCGTTTCC  
SRR944634.20628373.1- CCCCTCCACTGCTGCGTTTCC  
SRR944633.98128369.2- CACCTCCACTGCTGCGTTTCC  
SRR944633.99195671.1- CACCTCCACTGCTGCGTTTCC  
SRR944637.36954774.1+ CACCTCCACTGCTGCGTTTCC  
SRR944637.48405569.1+ CACCTCCACTGCTGCGTTTCC  
SRR944637.67596548.1+ CACCTCCACTGCTGCGTTTCC  
SRR944637.20349171.2+ CACCTCCACTGCTGCGTTTCC  
SRR944633.33685071.2+ CACCTCCACTGCTGCGTTTCC  
SRR944633.37543341.1+ CACCTCCACTGCTGCGTTTCC  
SRR944633.49669968.2+ CACCTCCACTGCTGCGTTTCC  
SRR944633.82191784.2- CCCCTCCACTGCTGCGTTTCC  
SRR944633.94174440.1+ CACCTCCACTGCTGCGTTTCC  
SRR944634.34545057.1- CCCCTCCACTGCTGCGTTTCC  
SRR944634.36413891.2+ CACCTCCACTGCTGCGTTTCC  
SRR944634.54009543.1- CCCCTCCACTGCTGCGTTTCC  
SRR944634.56993620.1+ CACCTCCACTGCTGCGTTTCC  
SRR944634.61033746.2- CCCCTCCACTGCTGCGTTTCC  
SRR944634.94919320.1- CCCCTCCACTGCTGCGTTTCC  
SRR944634.95930937.1+ CACCTCCACTGCTGCGTTTCC  
SRR944634.96353591.2+ CACCTCCACTGCTGCGTTTCC  
SRR944635.19297688.2+ CACCTCCACTGCTGCGTTTCC  
SRR944635.75573623.2- CCCCTCCACTGCTGCGTTTCC  
SRR944635.8277624.2- CCCCTCCACTGCTGCGTTTCC  
SRR944637.29882792.1- CCCCTCCACTGCTGCGTTTCC  
SRR944637.42475624.1+ CACCTCCACTGCTGCGTTTCC  
SRR944637.48110385.1- CCCCTCCACTGCTGCGTTTCC  
SRR944631.16048198.1- CCTCCACTGCTGCGTTTCC  
SRR944631.20551822.1- CCTCCACTGCTGCGTTTCC  
SRR944631.25176894.1- CCTCCACTGCTGCGTTTCC  
SRR944631.52096585.1- CCTCCACTGCTGCGTTTCC  
SRR944636.55339904.1- CCTCCACTGCTGCGTTTCC  
SRR944634.63040457.1- CCTCCACTGCTGCGTTTCC  
SRR944630.24118277.2- CTCCACTGCTGCGTTTCC  
SRR944630.25715866.2- CTCCACTGCTGCGTTTCC  
SRR944630.56020051.2- CTCCACTGCTGCGTTTCC

|                        |                                                         |
|------------------------|---------------------------------------------------------|
| SRR944630.84361880.2-  | CTCCACTGCTGCGTTTTCCCACCTTATTGGATCCTTCCAGCATGTTCTA       |
| SRR944630.97039812.2-  | CTCCACTGCTGCGTTTTCCCACCTTATTGGATCCTTCCAGCATGTTCTA       |
| SRR944635.49884631.1-  | CCACTGCTGCGTTTTCCCACCTTATTGGATCCTTCCAGCATGTTCTACCTCCACT |
| SRR944630.25453168.2+  | CACTGCTGCGTTTTCCCACCTTATTGGATCCTTCCAGCATGTTCTACCT       |
| SRR944630.53809540.1+  | CACTGCTGCGTTTTCCCACCTTATTGGATCCTTCCAGCATGTTCTACCT       |
| SRR944637.27932713.2+  | CACTGCTGCGTTTTCCCACCTTATTGGATCCTTCCAGCATGTTCTACCTCCACT  |
| SRR944634.27747891.1+  | ACTGCTGCGTTTTCCCACCTTATTGGATCCTTCCAGCATGTTCTACCTCCACT   |
| SRR944639.42258251.1+  | CTGCTGCGTTTTCCCACCTTATTGGATCCTTCCAGCATGTTCTACCTCC       |
| SRR944639.90379582.1+  | CTGCTGCGTTTTCCCACCTTATTGGATCCTTCCAGCATGTTCTACCTCC       |
| SRR944633.22219140.1-  | CTGCTGCGTTTTCCCACCTTATTGGATCCTTCCAGCATGTTCTACCTCCACT    |
| SRR944633.6245784.1+   | CTGCTGCGTTTTCCCACCTTATTGGATCCTTCCAGCATGTTCTACCTCCACT    |
| SRR944638.10407365.2-  | TGCTGCGTTTTCCCACCTTATTGGATCCTTCCAGCATGTTCTACCTCCA       |
| SRR944633.90674241.1-  | GCTGCGTTTTCCCACCTTATTGGATCCTTCCAGCATGTTCTACCTCCACT      |
| SRR944634.3508483.1-   | GCTGCTTTTTCCCCCCTTATTGGATCCTTCCAGCATGTTCTACCTCCACT      |
| SRR944636.39659613.2+  | CGTTTTCCCACCTTATTGGATCCTTCCAGCATGTTCTACCTCCACT          |
| SRR944632.54147278.1+  | GTTTTCCCACCTTATTGGATCCTTCCAGCATGTTCTACCTCCACT           |
| SRR944632.59154265.1-  | GTTTTCCCACCTTATTGGATCCTTCCAGCATGTTCTACCTCCACT           |
| SRR944634.10483507.1+  | GTTTTCCCACCTTATTGGATCCTTCCAGCATGTTCTACCTCCACT           |
| SRR944635.36734830.2+  | GTTTTCCCACCTTATTGGATCCTTCCAGCATGTTCTACCTCCACT           |
| SRR944639.40454281.2+  | GTTTTCCCACCTTATTGGATCCTTCCAGCATGTTCTACCTCCACT           |
| SRR944634.18725566.1+  | TTTTCCCACCTTATTGGATCCTTCCAGCATGTTCTACCTCCACT            |
| SRR944637.66585051.1-  | TTTTCCCACCTTATTGGATCCTTCCAGCATGTTCTACCTCCACT            |
| SRR944638.19970532.1+  | TTTTCCCACCTTATTGGATCCTTCCAGCATGTTCTACCTCCACT            |
| SRR944638.4524910.1+   | TTTTCCCACCTTATTGGATCCTTCCAGCATGTTCTACCTCCACT            |
| SRR944639.27712427.2+  | TTTTCCCACCTTATTGGATCCTTCCAGCATGTTCTACCTCCACT            |
| SRR944639.8021464.2+   | TTTTCCCACCTTATTGGATCCTTCCAGCATGTTCTACCTCCACT            |
| SRR944631.38021789.1+  | TTCCCCACCTTATTGGATCCTTCCAGCATGTTCTACCTCCACT             |
| SRR944631.45456746.1+  | TTCCCCACCTTATTGGATCCTTCCAGCATGTTCTACCTCCACT             |
| SRR944631.46791067.1+  | TTCCCCACCTTATTGGATCCTTCCAGCATGTTCTACCTCCACT             |
| SRR944634.44547124.1+  | TTCCCCACCTTATTGGATCCTTCCAGCATGTTCTACCTCCACT             |
| SRR944639.40231068.1+  | TTCCCCACCTTATTGGATCCTTCCAGCATGTTCTACCTCCACT             |
| SRR944632.58349281.2-  | TCCCCACCTTATTGGATCCTTCCAGCATGTTCTACCTCCACT              |
| SRR944632.68184668.2-  | TCCCCACCTTATTGGATCCTTCCAGCATGTTCTACCTCCACT              |
| SRR944634.69071785.2-  | CCCCCCTTATTGGATCCTTCCAGCATGTTCTCCCTCCACT                |
| SRR944638.26820928.1+  | CCCCACCTTATTGGATCCTTCCAGCATGTTCTACCTCCACT               |
| SRR944630.121406811.1- | CCCACCTTATTGGATCCTTCCAGCATGTTCTACCTCCACT                |
| SRR944630.22625207.1-  | CCCACCTTATTGGATCCTTCCAGCATGTTCTACCTCCACT                |
| SRR944630.63102084.1-  | CCCACCTTATTGGATCCTTCCAGCATGTTCTACCTCCACT                |
| SRR944630.89008962.1-  | CCCACCTTATTGGATCCTTCCAGCATGTTCTACCTCCACT                |
| SRR944633.5304783.2+   | CCCACCTTATTGGATCCTTCCAGCATGTTCTACCTCCACT                |
| SRR944637.60761079.2+  | CACCTTATTGGATCCTTCCAGCATGTTCTACCTCCACT                  |
| SRR944632.44981717.1+  | CCTTATTGGATCCTTCCAGCATGTTCTACCTCCACT                    |
| SRR944634.71474468.1-  | CCTTATTGGATCCTTCCAGCATGTTCTACCTCCACT                    |
| SRR944635.81118867.1-  | CCTTATTGGATCCTTCCAGCATGTTCTACCTCCACT                    |
| SRR944636.41076715.1+  | TTATTGGATCCTTCCAGCATGTTCTACCTCCACT                      |
| SRR944636.4281731.2+   | TTATTGGATCCTTCCAGCATGTTCTACCTCCACT                      |
| SRR944636.608439.1+    | TTATTGGATCCTTCCAGCATGTTCTACCTCCACT                      |
| SRR944639.25479476.1+  | TATTGGATCCTTCCAGCATGTTCTACCTCCACT                       |
| SRR944636.64757170.2+  | TTGGATCCTTCCAGCATGTTCTACCTCCACT                         |
| SRR944636.73199438.1+  | TTGGATCCTTCCAGCATGTTCTACCTCCACT                         |
| SRR944636.85911281.1+  | TTGGATCCTTCCAGCATGTTCTACCTCCACT                         |
| SRR944632.18161690.2+  | TGGATCCTTCCAGCATGTTCTACCTCCACT                          |
| SRR944632.20945602.2+  | TGGATCCTTCCAGCATGTTCTACCTCCACT                          |
| SRR944632.113114427.2+ | GATCCTTCCAGCATGTTCTACCTCCACT                            |
| SRR944635.6426379.1-   | GATCCTTCCAGCATGTTCTACCTCCACT                            |
| SRR944636.66276717.1+  | GATCCTTCCAGCATGTTCTACCTCCACT                            |
| SRR944635.90005215.1-  | TCCTCCAGCATGTTCTCCCTCCACT                               |
| SRR944639.91169517.1-  | TCCTTCCAGCATGTTCTACCTCCACT                              |
| SRR944636.82506820.2+  | CCTTCCAGCATGTTCTACCTCCACT                               |
| SRR944633.6245784.2-   | CTCCCAGCATTTTTCCACCTCCACT                               |
| SRR944635.57178392.1+  | CTTCCAGCATGTTCTACCTCCACT                                |
| SRR944637.2949431.2-   | CTCCAGCATGTTCTACCTCCACT                                 |
| SRR944638.23438986.2+  | CTTCCAGCATGTTCTACCTCCACT                                |
| SRR944638.61445856.2+  | CTTCCAGCATGTTCTACCTCCACT                                |
| SRR944638.80030283.2+  | CTTCCAGCATGTTCTACCTCCACT                                |
| SRR944636.31398530.1-  | TCCAGCATGTTCTACCTCCACT                                  |
| SRR944632.66509157.2-  | CAGCATGTTCTCCCTCCACT                                    |
| SRR944634.90107683.2+  | CAGCATGTTCTACCTCCACT                                    |
| SRR944636.1766768.1-   | AGCATGTTCTACCTCCACT                                     |
| SRR944636.61934370.1-  | AGCATGTTCTACCTCCACT                                     |
| SRR944637.21269815.2+  | AGCATGTTCTACCTCCACT                                     |
| SRR944635.11655522.1+  | CATGTTCTACCTCCACT                                       |
| SRR944639.9343527.1+   | CATGTTCTACCTCCACT                                       |
| SRR944631.43349604.2+  | ATGTTCTACCTCCACT                                        |
| SRR944633.96164481.1+  | ATGTTCTACCTCCACT                                        |
| SRR944633.100415876.2+ | TGTTCTACCTCCACT                                         |
| SRR944630.70037776.2+  | GTTTACCTCCACT                                           |
| SRR944633.66408716.2+  | GTTTACCTCCACT                                           |
| SRR944633.54109791.2-  | TTCTCCCTCCACT                                           |
| SRR944634.36413891.1-  | TTCTCCCTCCACT                                           |
| SRR944633.58893957.2+  | TCTACCTCCACT                                            |
| SRR944633.70260610.1+  | TCTACCTCCACT                                            |
| SRR944632.195484.2+    | CTACCTCCACT                                             |
| SRR944632.96398654.2+  | CTACCTCCACT                                             |

|                       |            |
|-----------------------|------------|
| SRR944636.32951693.1+ | TACCTCCACT |
| SRR944634.96353591.1- | CCCTCCACT  |
| SRR944637.32814322.2- | CCCTCCACT  |
| SRR944635.13217570.2- | CCTCTACT   |
| SRR944639.41608196.2+ | CCTCCACT   |
| SRR944633.49669968.1- | CTCCACT    |
| SRR944636.40446523.1- | TCCACT     |
| SRR944632.98092518.2+ | CCACT      |
| SRR944634.95930937.2- | CCACT      |
| SRR944637.41492408.2+ | CACT       |
| SRR944639.35501012.2+ | CACT       |
| SRR944630.3862609.2-  | ACT        |
| SRR944630.32863949.2- | CT         |
| SRR944633.33685071.1- | CT         |
| SRR944633.37543341.2- | CT         |
| SRR944633.91746479.2+ | T          |
| SRR944634.8289892.1+  | T          |

consensus

CACTCCACTGCTGCGTTTCCCCACCTTATTGGATCCTTCCAGCATGTTCTACCTCCACT

|                        |                                         |
|------------------------|-----------------------------------------|
| SRR944634.36413891.2+  | GGG                                     |
| SRR944636.39659613.2+  | GGG                                     |
| SRR944637.48110385.1-  | GGG                                     |
| SRR944632.54147278.1+  | GGGA                                    |
| SRR944632.59154265.1-  | GGGA                                    |
| SRR944639.40454281.2+  | GGGA                                    |
| SRR944638.19970532.1+  | GGGAC                                   |
| SRR944638.4524910.1+   | GGGAC                                   |
| SRR944639.27712427.2+  | GGGAC                                   |
| SRR944639.8021464.2+   | GGGAC                                   |
| SRR944631.38021789.1+  | GGGACC                                  |
| SRR944631.45456746.1+  | GGGACC                                  |
| SRR944631.46791067.1+  | GGGACC                                  |
| SRR944639.40231068.1+  | GGGACC                                  |
| SRR944632.58349281.2-  | GGGACCA                                 |
| SRR944632.68184668.2-  | GGGACCA                                 |
| SRR944638.26820928.1+  | GGGACCAC                                |
| SRR944630.121406811.1- | GGGACCACG                               |
| SRR944630.22625207.1-  | GGGACCACG                               |
| SRR944630.63102084.1-  | GGGACCACG                               |
| SRR944630.89008962.1-  | GGGACCACG                               |
| SRR944637.42475624.1+  | GGGACCACGA                              |
| SRR944632.44981717.1+  | GGGACCACGAGGA                           |
| SRR944633.37543341.1+  | GGGACCACGAGGAAC                         |
| SRR944636.41076715.1+  | GGGACCACGAGGAAC                         |
| SRR944636.4281731.2+   | GGGACCACGAGGAAC                         |
| SRR944636.608439.1+    | GGGACCACGAGGAAC                         |
| SRR944639.25479476.1+  | GGGACCACGAGGAACA                        |
| SRR944636.64757170.2+  | GGGACCACGAGGAACAGG                      |
| SRR944636.73199438.1+  | GGGACCACGAGGAACAGG                      |
| SRR944636.85911281.1+  | GGGACCACGAGGAACAGG                      |
| SRR944632.18161690.2+  | GGGACCACGAGGAACAGGA                     |
| SRR944632.20945602.2+  | GGGACCACGAGGAACAGGA                     |
| SRR944635.8277624.2-   | GGGACCACGAGGAACAGGA                     |
| SRR944637.29882792.1-  | GGGACCACGAGGAACAGGA                     |
| SRR944634.95930937.1+  | GGGACCACGAGGAACAGGAG                    |
| SRR944634.96353591.2+  | GGGACCACGAGGAACAGGAG                    |
| SRR944632.113114427.2+ | GGGACCACGAGGAACAGGAGC                   |
| SRR944636.66276717.1+  | GGGACCACGAGGAACAGGAGC                   |
| SRR944635.19297688.2+  | GGGACCACGAGGAACAGGAGCTG                 |
| SRR944639.91169517.1-  | GGGACCACGAGGAACAGGAGCTG                 |
| SRR944634.54009543.1-  | GGGACCACGAGGAACAGGAGCTGA                |
| SRR944636.82506820.2+  | GGGACCACGAGGAACAGGAGCTGA                |
| SRR944638.23438986.2+  | GGGACCACGAGGAACAGGAGCTGAT               |
| SRR944638.61445856.2+  | GGGACCACGAGGAACAGGAGCTGAT               |
| SRR944638.80030283.2+  | GGGACCACGAGGAACAGGAGCTGAT               |
| SRR944636.31398530.1-  | GGGACCACGAGGAACAGGAGCTGATGA             |
| SRR944632.66509157.2-  | GGGACCACGAGGAACAGGAGCTGATGAGG           |
| SRR944633.33685071.2+  | GGGACCACGAGGAACAGGAGCTGATGAGG           |
| SRR944633.82191784.2-  | GGGACCACGAGGAACAGGAGCTGATGAGGT          |
| SRR944636.1766768.1-   | GGGACCACGAGGAACAGGAGCTGATGAGGT          |
| SRR944636.61934370.1-  | GGGACCACGAGGAACAGGAGCTGATGAGGT          |
| SRR944635.75573623.2-  | GGGACCACGAGGAACAGGAGCTGATGAGGTT         |
| SRR944639.9343527.1+   | GGGACCACGAGGAACAGGAGCTGATGAGGTTG        |
| SRR944631.43349604.2+  | GGGACCACGAGGAACAGGAGCTGATGAGGTTGA       |
| SRR944634.61033746.2-  | GGGACCACGAGGAACAGGAGCTGATGAGGTTGA       |
| SRR944634.56993620.1+  | GGGACCACGAGGAACAGGAGCTGATGAGGTTGAG      |
| SRR944630.70037776.2+  | GGGACCACGAGGAACAGGAGCTGATGAGGTTGAGC     |
| SRR944633.49669968.2+  | GGGACCACGAGGAACAGGAGCTGATGAGGTTGAGCT    |
| SRR944634.94919320.1-  | GGGACCACGAGGAACAGGAGCTGATGAGGTTGAGCT    |
| SRR944632.195484.2+    | GGGACCACGAGGAACAGGAGCTGATGAGGTTGAGCTGC  |
| SRR944632.96398654.2+  | GGGACCACGAGGAACAGGAGCTGATGAGGTTGAGCTGC  |
| SRR944636.32951693.1+  | GGGACCACGAGGAACAGGAGCTGATGAGGTTGAGCTGCA |

SRR944634.34545057.1- GGGACCACGAGGAACAGGAGCTGATGAGGTTGAGCTGCAC  
SRR944639.41608196.2+ GGGACCACGAGGAACAGGAGCTGATGAGGTTGAGCTGCACA  
SRR944634.63040457.1- GGGACCACGAGGAACAGGAGCTGATGAGGTTGAGCTGCACAT  
SRR944636.40446523.1- GGGACCACGAGGAACAGGAGCTGATGAGGTTGAGCTGCACATC  
SRR944632.98092518.2+ GGGACCACGAGGAACAGGAGCTGATGAGGTTGAGCTGCACATCC  
SRR944637.27932713.2+ GGGACCACGAGGAACAGGAGCTGATGAGGTTGAGCTGCACATCC  
SRR944635.49884631.1- GGGACCACGAGGAACAGGAGCTGATGAGGTTGAGCTGCACATCCA  
SRR944639.35501012.2+ GGGACCACGAGGAACAGGAGCTGATGAGGTTGAGCTGCACATCCA  
SRR944630.1730641.2- GGGACCACGAGGAACAGGAGCTGATGAGGTTGAGCTGCACATCCAC  
SRR944630.32863949.2- GGGACCACGAGGAACAGGAGCTGATGAGGTTGAGCTGCACATCCAC  
SRR944630.3862609.2- GGGACCACGAGGAACAGGAGCTGATGAGGTTGAGCTGCACATCCAC  
SRR944633.22219140.1- GGGACCACGAGGAACAGGAGCTGATGAGGTTGAGCTGCACATCCAC  
SRR944634.27747891.1+ GGGACCACGAGGAACAGGAGCTGATGAGGTTGAGCTGCACATCCACA  
SRR944633.6245784.1+ GGGACCACGAGGAACAGGAGCTGATGAGGTTGAGCTGCACATCCACAC  
SRR944630.25461350.2- GGGACCACGAGGAACAGGAGCTGATGAGGTTGAGCTGCACATCCACACA  
SRR944630.5400523.2- GGGACCACGAGGAACAGGAGCTGATGAGGTTGAGCTGCACATCCACACA  
SRR944630.74999846.2- GGGACCACGAGGAACAGGAGCTGATGAGGTTGAGCTGCACATCCACACA  
SRR944633.90674241.1- GGGACCACGAGGAACAGGAGCTGATGAGGTTGAGCTGCACATCCACACAA  
SRR944634.3508483.1- GGGACCACGAGGAACAGGAGCTGATGAGGTTGAGCTGCACATCCACACAA  
SRR944637.66585051.1- GGGACCACGAGGAACAGGAGCTGATGAGGTTGAGCTGCACATCCACACAACTGG  
SRR944634.10483507.1+ GGGACCACGAGGAACAGGAGCTGATGAGGTTGAGCTGCACATCCACACAACTGGC  
SRR944634.69071785.2- GGGACCACGAGGAACAGGAGCTGATGAGGTTGAGCTGCACATCCACACAACTGGC  
SRR944635.36734830.2+ GGGACCACGAGGAACAGGAGCTGATGAGGTTGAGCTGCACATCCACACAACTGGC  
SRR944634.18725566.1+ GGGACCACGAGGAACAGGAGCTGATGAGGTTGAGCTGCACATCCACACAACTGGCT  
SRR944635.13217570.2- GGGACCACGAGGAACAGGAGCTGATGAGGTTGAGCTGCCATCCACACAACTGGCT  
SRR944634.44547124.1+ GGGACCACGAGGAACAGGAGCTGATGAGGTTGAGCTGCACATCCACACAACTGGCTG  
SRR944633.100415876.2+ GGGACCACGAGGAACAGGAGCTGATGAGGTTGAGCTGCACATCCACACAACTGGCTGGAA  
SRR944633.33685071.1- GGGACCACGAGGAACAGGAGCTGATGAGGTTGAGCTGCACATCCACACAACTGGCTGGAT  
SRR944633.37543341.2- GGGACCACGAGGAACAGGAGCTGATGAGGTTGAGCTGCACATCCACACAACTGGCTGGAT  
SRR944633.49669968.1- GGGACCACGAGGAACAGGAGCTGATGAGGTTGAGCTGCACATCCACACAACTGGCTGGAT  
SRR944633.5304783.2+ GGGACCACGAGGAACAGGAGCTGATGAGGTTGAGCTGCACATCCACACAACTGGCTGGAT  
SRR944633.54109791.2- GGGACCACGAGGAACAGGAGCTGATGAGGTTGAGCTGCACATCCACACAACTGGCTGGAT  
SRR944633.58893957.2+ GGGACCACGAGGAACAGGAGCTGATGAGGTTGAGCTGCACATCCACACAACTGGCTGGAA  
SRR944633.6245784.2- GGGACCACGAGGAACAGGAGCTGATGAGGTTGAGCTGCACATCCACACAACTGGCTGGAT  
SRR944633.66408716.2+ GGGACCACGAGGAACAGGAGCTGATGAGGTTGAGCTGCACATCCACACAACTGGCTGGAT  
SRR944633.70260610.1+ GGGACCACGAGGAACAGGAGCTGATGAGGTTGAGCTGCACATCCACACAACTGGCTGGAT  
SRR944633.91746479.2+ GGGACCACGAGGAACAGGAGCTGATGAGGTTGAGCTGCACATCCACACAACTGGCTGGAT  
SRR944633.96164481.1+ GGGACCACGAGGAACAGGAGCTGATGAGGTTGAGCTGCACATCCACACAACTGGCTGGAT  
SRR944634.36413891.1- GGGACCACGAGGAACAGGAGCTGATGAGGTTGAGCTGCACATCCACACAACTGGCTGGAT  
SRR944634.71474468.1- GGGACCACGAGGAACAGGAGCTGATGAGGTTGAGCTGCACATCCACACAACTGGCTGGAT  
SRR944634.8289892.1+ GGGACCACGAGGAACAGGAGCTGATGAGGTTGAGCTGCACATCCACACAACTGGCTGGAT  
SRR944634.90107683.2+ GGGACCACGAGGAACAGGAGCTGATGAGGTTGAGCTGCACATCCACACAACTGGCTGGAT  
SRR944634.95930937.2- GGGACCACGAGGAACAGGAGCTGATGAGGTTGAGCTGCACATCCACACAACTGGCTGGAT  
SRR944634.96353591.1- GGGACCACGAGGAACAGGAGCTGATGAGGTTGAGCTGCACATCCACACAACTGGCTGGAT  
SRR944635.11655522.1+ GGGACCACGAGGAACAGGAGCTGATGAGGTTGAGCTGCACATCCACACAACTGGCTGGAT  
SRR944635.35994372.1- GGGACCACGAGGAACAGGAGCTGATGAGGTTGAGCTGCACATCCACACAACTGGCTGGAT  
SRR944635.57178392.1+ GGGACCACGAGGAACAGGAGCTGATGAGGTTGAGCTGCACATCCACACAACTGGCTGGAT  
SRR944635.6426379.1- GGGACCACGAGGAACAGGAGCTGATGAGGTTGAGCTGCACATCCACACAACTGGCTGGAT  
SRR944635.81118867.1- GGGACCACGAGGAACAGGAGCTGATGAGGTTGAGCTGCACATCCACACAACTGGCTGGAT  
SRR944635.90005215.1- GGGACCACGAGGAACAGGAGCTGATGAGGTTGAGCTGCACATCCACACAACTGGCTGGAT  
SRR944637.21269815.2+ GGGACCACGAGGAACAGGAGCTGATGAGGTTGAGCTGCACATCCACACAACTGGCTGGAT  
SRR944637.2949431.2- GGGACCACGAGGAACAGGAGCTGATGAGGTTGAGCTGCACATCCACACAACTGGCTGGAT  
SRR944637.32814322.2- GGGACCACGAGGAACAGGAGCTGATGAGGTTGAGCTGCACATCCACACAACTGGCTGGAT  
SRR944637.41492408.2+ GGGACCACGAGGAACAGGAGCTGATGAGGTTGAGCTGCACATCCACACAACTGGCTGGAT  
SRR944637.60761079.2+ GGGACCACGAGGAACAGGAGCTGATGAGGTTGAGCTGCACATCCACACAACTGGCTGGAT  
SRR944636.61145333.1+ ACCACGAGGAACAGGAGCTGATGAGGTTGAGCTGCACATCCACACAACT  
SRR944636.88140504.1- CCACGAGGAACAGGAGCTGATGAGGTTGAGCTGCACATCCACACAACTG  
SRR944630.3117193.2+ CCACGAGGAACAGGAGCTGATGAGGTTGAGCTGCACATCCACACAACTG  
SRR944630.39077923.2+ CCACGAGGAACAGGAGCTGATGAGGTTGAGCTGCACATCCACACAACTG  
SRR944630.87553480.2+ CCACGAGGAACAGGAGCTGATGAGGTTGAGCTGCACATCCACACAACTG  
SRR944636.8868960.2+ CACGAGGAACAGGAGCTGATGAGGTTGAGCTGCACATCCACACAACTGG  
SRR944632.39371924.2+ GAGGAACAGGAGCTGATGAGGTTGAGCTGCACATCCACACAACTGGCTG  
SRR944632.6491554.2- GAGGAACAGGAGCTGATGAGGTTGAGCTGCACATCCACACAACTGGCTG  
SRR944633.26132114.1+ GAGGAACAGGAGCTGATGAGGTTGAGCTGCACATCCACACAACTGGCTGGAT  
SRR944632.102059811.1+ AGGAACAGGAGCTGATGAGGTTGAGCTGCACATCCACACAACTGGCTGG  
SRR944634.18725566.2- GGAACAGGAGCTGATGAGGTTGAGCTGCACATCCACACAACTGGCTGGAT  
SRR944633.72364928.2+ ACAGGAGCTGATGAGGTTGAGCTGCACATCCACACAACTGGCTGGAT  
SRR944638.34568035.2+ AGGAGCTGATGAGGTTGAGCTGCACATCCACACAACTGGCTGGAT  
SRR944638.39020624.2+ AGGAGCTGATGAGGTTGAGCTGCACATCCACACAACTGGCTGGAT  
SRR944634.44547124.2- GGAGCTGATGAGGTTGAGCTGCACATCCACACAACTGGCTGGAT  
SRR944635.57173909.1+ GGAGCTGATGAGGTTGAGCTGCACATCCACACAACTGGCTGGAT  
SRR944632.13271979.1- AGCTGATGAGGTTGAGCTGCACATCCACACAACTGGCTGGAT  
SRR944632.30320650.1- AGCTGATGAGGTTGAGCTGCACATCCACACAACTGGCTGGAT  
SRR944635.59792053.2+ AGCTGATGAGGTTGAGCTGCACATCCACACAACTGGCTGGAT  
SRR944636.71511825.1- GCTGATGAGGTTGAGCTGCACATCCACACAACTGGCTGGAT  
SRR944634.56993620.2- CTGATGAGGTTGAGCTGCACATCCACACAACTGGCTGGAT  
SRR944635.26842443.1- CTGATGAGGTTGAGCTGCACATCCACACAACTGGCTGGAT  
SRR944635.55524370.2+ CTGATGAGGTTGAGCTGCACATCCACACAACTGGCAGGAT  
SRR944635.67387987.2+ CTGATGAGGTTGAGCTGCACATCCACACAACTGGCTGGAT  
SRR944630.53677100.2+ TGATGAGGTTGAGCTGCACATCCACACAACTGGCTGGAT  
SRR944634.60100148.2+ TGATGAGGTTGAGCTGCACATCCACACAACTGGCTGGAT  
SRR944639.50819808.2+ TGATGAGGTTGAGCTGCACATCCACACAACTGGCTGGAT  
SRR944636.7358424.1+ GATGAGGTTGAGCTGCACATCCACACAACTGGCTGGAT  
SRR944634.27747891.2- ATGAGGTTGAGCTGCACATCCACACAACTGGCTGGAT

SRR944637.18002670.2-  
SRR944636.38241941.1+  
SRR944636.26614040.1+  
SRR944632.2794312.1+  
SRR944632.52740312.1+  
SRR944634.10483507.2-  
SRR944635.81516722.2-  
SRR944632.100497177.1+  
SRR944632.47848021.1-  
SRR944638.33077779.1-  
SRR944638.50525901.1-  
SRR944638.9113724.1-  
SRR944635.25751445.2-  
SRR944635.48675781.2-  
SRR944637.18612130.2+  
SRR944636.6219837.1+  
SRR944637.48990847.2-  
SRR944633.55088954.1+  
SRR944636.14867043.2-  
SRR944639.36153102.1+  
SRR944635.48191009.2-  
SRR944638.17491490.2-  
SRR944638.24792007.2-  
SRR944636.47374346.2-  
SRR944638.63988209.1+  
SRR944639.95430747.1-  
SRR944633.58893957.1-  
SRR944632.61973592.2+  
SRR944633.22731044.1+  
SRR944633.5304783.1-  
SRR944634.90107683.1-  
SRR944634.62072555.1+  
SRR944638.363258.2-  
SRR944634.36751401.2+  
SRR944637.41203321.1+  
SRR944639.83356177.2+  
SRR944630.111468291.2-  
SRR944630.115766130.2-  
SRR944630.22557989.2-  
SRR944638.29797893.1+  
SRR944638.77656764.1+  
SRR944633.100415876.1-  
SRR944632.102005917.2+  
SRR944632.30311077.2+  
SRR944633.70260610.2-  
SRR944633.66408716.1-  
SRR944639.71512403.1+

TGAGGTGGAGCTGCACATCCACACAACCTGGCTGGAT  
GAGGTTGAGCTGCACATCCACACAACCTGGCTGGAT  
GGTTGAGCTGCACATCCACACAACCTGGCTGGAT  
GTTGAGCTGCACATCCACACAACCTGGCTGGAT  
GTTGAGCTGCACATCCACACAACCTGGCTGGAT  
TTGAGCTGCATCTCCACACAACAGGCTGGAT  
TTGAGCTGCACATCCACACAACCTGGCTGGAT  
GAGCTGCACATCCACACAACCTGGCTGGAT  
GAGCTGCACATCCACACAACCTGGCTGGAT  
GAGCTGCACATCCACACAACCTGGCTGGAT  
GAGCTGCACATCCACACAACCTGGCTGGAT  
AGCTGCCCATCCACACAACCTGGCTGGAT  
CTGCACATCCACACAACCTGGCTGGAT  
CTGCACATCCACACAACCTGGCTGGAT  
TGCACATCCACACAACCTGGCTGGAT  
GCACATCCACACAACCTGGCTGGAT  
ACATCCACACAACCTGGCTGGAT  
ACATCCACACAACCTGGCTGGAT  
ACATCCACACAACCTGGCTGGAT  
ATCCACACAACCTGGCTGGAT  
ATCCACACAACCTGGCTGGAT  
ATCCACACAACCTGGCTGGAT  
CCACACAACCTGGCTGGAT  
CACACAACCTGGCTGGAT  
ACACAACCTGGCTGGAT  
CACAACTGGCTGGAT  
ACAACCTGGCTGGAT  
ACAACCTGGCTGGAT  
ACTGGCTGGAT  
ACTGGCTGGAT  
TGGCTGGAT  
GGCTGGAT  
CTGGAT  
CTGGAT  
CTGGAT  
TGGAT  
TGGAT  
TGGAT  
GGAT  
GGAT  
GAT  
AT  
AT  
AT  
T  
T

consensus

GGGACCACGAGGAACAGGAGCTGATGAGGTTGAGCTGCACATCCACACAACCTGGCTGGAT

SRR944637.21269815.2+  
SRR944633.100415876.2+  
SRR944634.71474468.1-  
SRR944638.34568035.2+  
SRR944638.39020624.2+  
SRR944635.81118867.1-  
SRR944632.13271979.1-  
SRR944632.30320650.1-  
SRR944636.71511825.1-  
SRR944636.7358424.1+  
SRR944630.53677100.2+  
SRR944639.50819808.2+  
SRR944633.6245784.2-  
SRR944635.6426379.1-  
SRR944635.90005215.1-  
SRR944636.38241941.1+  
SRR944637.32814322.2-  
SRR944635.57178392.1+  
SRR944636.26614040.1+  
SRR944637.2949431.2-  
SRR944632.2794312.1+  
SRR944632.52740312.1+  
SRR944632.100497177.1+  
SRR944632.47848021.1-  
SRR944634.90107683.2+  
SRR944638.33077779.1-  
SRR944638.50525901.1-  
SRR944638.9113724.1-  
SRR944633.96164481.1+  
SRR944635.11655522.1+  
SRR944636.6219837.1+  
SRR944633.58893957.2+  
SRR944633.66408716.2+

. : . : . : . : . : . :  
GGC  
GGCA  
GGCA  
GGCA  
GGCA  
GGCAT  
GGCATCT  
GGCATCT  
GGCATCTG  
GGCATCTGG  
GGCATCTGGA  
GGCATCTGGA  
GGCATCTGGATT  
GGCATCTGGATT  
GGCATCTGGATTCA  
GGCATCTGGATTCA  
GGCATCTGGATTCA  
GGCATCTGGATTCCAGC  
GGCATCTGGATTCCAGC  
GGCATCTGGATTCCAGC  
GGCATCTGGATTCCAGCC  
GGCATCTGGATTCCAGCC  
GGCATCTGGATTCCAGCCCTC  
GGCATCTGGATTCCAGCCCTC  
GGCATCTGGATTCCAGCCCTC  
GGCATCTGGATTCCAGCCCTC  
GGCATCTGGATTCCAGCCCTC  
GGCATCTGGATTCCAGCCCTCATG  
GGCATCTGGATTCCAGCCCTCATG  
GGCATCTGGATTCCAGCCCTCATGG  
GGCATATGGATTCCAGCCCTCATGGAG

SRR944634.36413891.1- GGCATCTGGATTCAGCCCTCATGGAGA  
SRR944634.96353591.1- GGCATCTGGATTCAGCCCTCATGGAGA  
SRR944636.14867043.2- GGCATCTGGATTCAGCCCTCATGGAGA  
SRR944639.36153102.1+ GGCATCTGGATTCAGCCCTCATGGAGA  
SRR944633.70260610.1+ GGCATCTGGATTCAGCCCTCATGGAGAG  
SRR944638.17491490.2- GGCATCTGGATTCAGCCCTCATGGAGAGC  
SRR944638.24792007.2- GGCATCTGGATTCAGCCCTCATGGAGAGC  
SRR944636.47374346.2- GGCATCTGGATTCAGCCCTCATGGAGAGCTG  
SRR944638.63988209.1+ GGCATCTGGATTCAGCCCTCATGGAGAGCTGC  
SRR944633.49669968.1- GGCATCTGGATTCAGCCCTCATGGAGAGCTGCC  
SRR944639.95430747.1- GGCATCTGGATTCAGCCCTCATGGAGAGCTGCC  
SRR944632.61973592.2+ GGCATCTGGATTCAGCCCTCATGGAGAGCTGCCCTG  
SRR944634.95930937.2- GGCATCTGGATTCAGCCCTCATGGAGAGCTGCCCTG  
SRR944637.41492408.2+ GGCATCTGGATTCAGCCCTCATGGAGAGCTGCCCTG  
SRR944633.37543341.2- GGCATCTGGATTCAGCCCTCATGGAGAGCTGCCCTGG  
SRR944633.33685071.1- GGCATCTGGATTCAGCCCTCATGGAGAGCTGCCCTGGAT  
SRR944635.35994372.1- GGCATCTGGATTCAGCCCTCATGGAGAGCTGCCCTGGAT  
SRR944633.91746479.2+ GGCATCTGGATTCAGCCCTCATGGAGAGCTGCCCTGGATA  
SRR944634.8289892.1+ GGCATCTGGATTCAGCCCTCATGGAGAGCTGCCCTGGATA  
SRR944638.363258.2- GGCATCTGGATTCAGCCCTCATGGAGAGCTGCCCTGGATATA  
SRR944639.83356177.2+ GGCATCTGGATTCAGCCCTCATGGAGAGCTGCCCTGGATATAAC  
SRR944630.111468291.2- GGCATCTGGATTCAGCCCTCATGGAGAGCTGCCCTGGATATAACA  
SRR944630.115766130.2- GGCATCTGGATTCAGCCCTCATGGAGAGCTGCCCTGGATATAACA  
SRR944630.22557989.2- GGCATCTGGATTCAGCCCTCATGGAGAGCTGCCCTGGATATAACA  
SRR944635.55524370.2+ GGCATCTGGATTCAGCCCTCATGGAGAGCTGCCCTGGATATAACA  
SRR944638.29797893.1+ GGCATCTGGATTCAGCCCTCATGGAGAGCTGCCCTGGATATAACAT  
SRR944638.77656764.1+ GGCATCTGGATTCAGCCCTCATGGAGAGCTGCCCTGGATATAACAT  
SRR944632.102005917.2+ GGCATCTGGATTCAGCCCTCATGGAGAGCTGCCCTGGATATAACATTG  
SRR944632.30311077.2+ GGCATCTGGATTCAGCCCTCATGGAGAGCTGCCCTGGATATAACATTG  
SRR944633.26132114.1+ GGCATCTGGATTCAGCCCTCATGGAGAGCTGCCCTGGATATAACATTGT  
SRR944639.71512403.1+ GGCATCTGGATTCAGCCCTCATGGAGAGCTGCCCTGGATATAACATTGT  
SRR944633.72364928.2+ GGCATCTGGATTCAGCCCTCATGGAGAGCTGCCCTGGATATAACATTGTGTA  
SRR944634.18725566.2- GGCATCTGGATTCAGCCCTCATGGAGAGCTGCCCTGGATATAACATTGTGTA  
SRR944635.59792053.2+ GGCATCTGGATTCAGCCCTCATGGAGAGCTGCCCTGGATATAACATTGTGTA  
SRR944634.60100148.2+ GGCATCTGGATTCAGCCCTCATGGAGAGCTGCCCTGGTATAACATTGTGACAGGG  
SRR944635.57173909.1+ GGCATCTGGATTCAGCCCTCATGGAGAGCTGCCCTGGATATAACATTGTGACAGGG  
SRR944634.44547124.2- GGCATCTGGATTCAGCCCTCATGGAGAGCTGCCCTGGATATAACATTGTGACAGGG  
SRR944634.10483507.2- GGCATCTGGATTCAGCCCTCATGGAGAGCTGCCCTGGATATAACATTGTGACAGGG  
SRR944637.18002670.2- GGCATCTGGATTCAGCCCTCATGGAGAGCTGCCCTGGATATAACATTGTGACAGGG  
SRR944633.100415876.1- GGCATCTGGATTCAGCCCTCATGGAGAGCTGCCCTGGATATAACATTGTGACAGGG  
SRR944633.12567580.1+ GGCATCTGGATTCAGCCCTCATGGAGAGCTGCCCTGGATATAACATTGTGACAGGG  
SRR944633.22731044.1+ GGCATCTGGATTCAGCCCTCATGGAGAGCTGCCCTGGATATAACATTGTGACAGGG  
SRR944633.5304783.1- GGCATCTGGATTCAGCCCTCATGGAGAGCTGCCCTGGATATAACATTGTGACAGGG  
SRR944633.55088954.1+ GGCATCTGGATTCAGCCCTCATGGAGAGCTGCCCTGGATATAACATTGTGACAGGG  
SRR944633.58893957.1- GGCATCTGGATTCAGCCCTCATGGAGAGCTGCCCTGGATATAACATTGTGACAGGG  
SRR944633.66408716.1- GGCATCTGGATTCAGCCCTCATGGAGAGCTGCCCTGGATATAACATTGTGACAGGG  
SRR944633.70260610.2- GGCATCTGGATTCAGCCCTCATGGAGAGCTGCCCTGGATATAACATTGTGACAGGG  
SRR944634.27747891.2- GGCATCTGGATTCAGCCCTCATGGAGAGCTGCCCTGGATATAACATTGTGACAGGG  
SRR944634.36751401.2+ GGCATCTGGATTCAGCCCTCATGGAGAGCTGCCCTGGATATAACATTGTGACAGGG  
SRR944634.56993620.2- GGCATCTGGATTCAGCCCTCATGGAGAGCTGCCCTGGATATAACATTGTGACAGGG  
SRR944634.62072555.1+ GGCATCTGGATTCAGCCCTCATGGAGAGCTGCCCTGGATATAACATTGTGACAGGG  
SRR944634.90107683.1- GGCATCTGGATTCAGCCCTCATGGAGAGCTGCCCTGGATATAACATTGTGACAGGG  
SRR944635.25751445.2- GGCATCTGGATTCAGCCCTCATGGAGAGCTGCCCTGGATATAACATTGTGACAGGG  
SRR944635.26842443.1- GGCATCTGGATTCAGCCCTCATGGAGAGCTGCCCTGGATATAACATTGTGACAGGG  
SRR944635.48191009.2- GGCATCTGGATTCAGCCCTCATGGAGAGCTGCCCTGGATATAACATTGTGACAGGG  
SRR944635.48675781.2- GGCATCTGGATTCAGCCCTCATGGAGAGCTGCCCTGGATATAACATTGTGACAGGG  
SRR944635.67387987.2+ GGCATCTGGATTCAGCCCTCATGGAGAGCTGCCCTGGATATAACATTGTGACAGGG  
SRR944635.81516722.2+ GGCATCTGGATTCAGCCCTCATGGAGAGCTGCCCTGGATATAACATTGTGACAGGG  
SRR944637.18612130.2+ GGCATCTGGATTCAGCCCTCATGGAGAGCTGCCCTGGATATAACATTGTGACAGGG  
SRR944637.3204364.1- GGCATCTGGATTCAGCCCTCATGGAGAGCTGCCCTGGATATAACATTGTGACAGGG  
SRR944637.41203321.1+ GGCATCTGGATTCAGCCCTCATGGAGAGCTGCCCTGGATATAACATTGTGACAGGG  
SRR944637.48990847.2- GGCATCTGGATTCAGCCCTCATGGAGAGCTGCCCTGGATATAACATTGTGACAGGG  
SRR944637.570564.1+ GGCATCTGGATTCAGCCCTCATGGAGAGCTGCCCTGGATATAACATTGTGACAGGG  
SRR944636.23172184.1+ ATCTGGATTCAGCCCTCATGGAGAGCTGCCCTGGATATAACATTGTGACA  
SRR944633.26132114.2- TGGATTCAGCCCTCATGGAGAGCTGCCCTGGATATAACATTGTGACAGGG  
SRR944635.24423685.1- TGGATTCAGCCCTCATGGAGAGCTGCCCTGGATATAACATTGTGACAGGG  
SRR944635.13764978.1- GATTCAGCCCTCATGGAGAGCTGCCCTGGATATAACATTGTGACAGGG  
SRR944635.82600026.1- GATTCAGCCCTCATGGAGAGCTGCCCTGGATATAACATTGTGACAGGG  
SRR944635.10104664.2- ATTCAGCCCTCATGGAGAGCTGCCCTGGATATAACATTGTGACAGGG  
SRR944637.66277957.1+ TTCAGCCCTCATGGAGAGCTGCCCTGGATATAACATTGTGACAGGG  
SRR944636.31854196.2+ TCAGCCCTCATGGAGAGCTGCCCTGGATATAACATTGTGACAGGG  
SRR944634.83589188.1+ CAGCCCTCATGGAGAGCTGCCCTGGATATAACATTGTGACAGGG  
SRR944634.59210810.1+ AGCCCTCATGGAGAGCTGCCCTGGATATAACATTGTGACAGGG  
SRR944639.35025396.2+ GCCCTCATGGAGAGCTGCCCTGGATATAACATTGTGACAGGG  
SRR944639.88519028.2+ GCCCTCATGGAGAGCTGCCCTGGATATAACATTGTGACAGGG  
SRR944638.48431457.1- CCCTCATGGAGAGCTGCCCTGGATATAACATTGTGACAGGG  
SRR944638.64645947.1- CCCTCATGGAGAGCTGCCCTGGATATAACATTGTGACAGGG  
SRR944638.80128535.1- CCCTCATGGAGAGCTGCCCTGGATATAACATTGTGACAGGG  
SRR944637.4770778.1+ CCTCATGGAGAGCTGCCCTGGATATAACATTGTGACAGGG  
SRR944639.20592150.1+ CATGGAGAGCTGCCCTGGATATAACATTGTGACAGGG  
SRR944633.91746479.1- ATGGAGAGCTGCCCTGGATATAACATTGTGACAGGG  
SRR944635.6485714.1- TGGAGAGCTGCCCTGGATATAACATTGTGACAGGG  
SRR944635.44560005.1- GGAGAGCTGCCCTGGATATAACATTGTGACAGGG  
SRR944637.64626416.2- AGCTGCCCTGGATATAACATTGTGACAGGG



SRR944633.72364928.1- GCTGCCTGGATATAACATTGTGAGAGGAGGTGC  
SRR944634.60100148.1- GCTGCCTGGATATAACATTGTGACAGGAGGTGC  
SRR944634.8289892.2- GCTGCCTGGATATAACATTGTGACAGGAGGTGC  
SRR944638.76380308.1- GCTGCCTGGATATAACATTGTGACAGGAGGTGC  
SRR944635.14783008.2- CTGCCTGGATATAACATTGTGACAGGAGGTGC  
SRR944635.5046535.1- CTGGATATAACATTGTGACAGGAGGTGC  
SRR944630.46910315.2- TGGATATAACATTGTGACAGGAGGTGC  
SRR944630.56113758.2- TGGATATAACATTGTGACAGGAGGTGC  
SRR944639.4474450.1- TGGATATAACATTGTGACAGGAGGTGC  
SRR944635.73418382.1- GGATATAACATTGTGACAGGAGGTGC  
SRR944639.34202714.2+ GGATATAACATTGTGACAGGAGGTGC  
SRR944636.2781029.1- GATATAACATTGTGACAGGAGGTGC  
SRR944638.39279198.2+ TATAACATTGTGACAGGAGGTGC  
SRR944638.43657872.2+ TATAACATTGTGACAGGAGGTGC  
SRR944632.26472867.1- ATAACATTGTGACAGGAGGTGC  
SRR944633.777688.1- ATAACATTTTGGACAGGAGGTGC  
SRR944637.12320160.1- ATAACATTGTGACAGGAGGTGC  
SRR944639.11134324.2- TAACATTGTGACAGGAGGTGC  
SRR944639.26937907.2- TAACATTGTGACAGGAGGTGC  
SRR944639.29003334.2+ AACATTGTGACAGGAGGTGC  
SRR944638.59244387.1+ ACATTGTGACAGGAGGTGC  
SRR944639.56854205.2+ ACATTGTGACAGGAGGTGC  
SRR944639.76938662.1+ ACATTGTGACAGGAGGTGC  
SRR944633.55088954.2- ATTGTGACAGGAGGTGC  
SRR944634.36751401.1- GTGACAGGAGGTTC  
SRR944638.71262487.1- GTGACAGGAGGTGC  
SRR944637.8913243.2+ TGACAGGAGGTGC  
SRR944635.30293163.1+ GACAGGAGGTGC  
SRR944630.28885318.1- ACAGGAGGTGC  
SRR944632.4798276.2+ AGGAGGTGC  
SRR944635.19092406.2+ AGGAGGTGC  
SRR944630.102667012.1+ GGAGGTGC  
SRR944630.2203921.2- GGTGC  
SRR944637.40151612.2+ GTGC  
SRR944634.51557407.2+ C

consensus

GGCATCTGGATTCAGCCCTCATGGAGCTGCCTGGATATAACATTGTGACAGGAGGTGC

SRR944634.27747891.2- CTC  
SRR944639.35025396.2+ CTC  
SRR944639.88519028.2+ CTC  
SRR944635.81516722.2- CTCC  
SRR944638.48431457.1- CTCC  
SRR944638.64645947.1- CTCC  
SRR944638.80128535.1- CTCC  
SRR944635.48675781.2- CTCCCC  
SRR944637.18612130.2+ CTCCCC  
SRR944639.20592150.1+ CTCCCCAA  
SRR944637.48990847.2- CTCCCCAAAT  
SRR944635.25751445.2- CTCCCCAAATGG  
SRR944634.36751401.2+ CTCCCCAAATGGCAG  
SRR944638.76380308.1- CTCCCCAAATGGCAGC  
SRR944633.55088954.1+ CTCCCCAAATGGCAGCAT  
SRR944633.22731044.1+ CTCCCCAAATGGCAGCATCT  
SRR944635.48191009.2- CTCCCCAAATGGCAGCATCT  
SRR944630.46910315.2- CTCCCCAAATGGCAGCATCTGA  
SRR944630.56113758.2- CTCCCCAAATGGCAGCATCTGA  
SRR944639.4474450.1- CTCCCCAAATGGCAGCATCTGA  
SRR944639.34202714.2+ CTCCCCAAATGGCAGCATCTGAT  
SRR944636.2781029.1- CTCCCCAAATGGCAGCATCTGATT  
SRR944633.58893957.1- CTCCCCAAATGGCAGCATCTGATTCT  
SRR944638.39279198.2+ CTCCCCAAATGGCAGCATCTGATTCT  
SRR944638.43657872.2+ CTCCCCAAATGGCAGCATCTGATTCT  
SRR944632.26472867.1- CTCCCCAAATGGCAGCATCTGATTCTCT  
SRR944633.5304783.1- CTCCCCAAATGGCAGCATCTGATTCTCT  
SRR944639.11134324.2- CTCCCCAAATGGCAGCATCTGATTCTCT  
SRR944639.26937907.2- CTCCCCAAATGGCAGCATCTGATTCTCT  
SRR944639.29003334.2+ CTCCCCAAATGGCAGCATCTGATTCTCT  
SRR944634.90107683.1- CTCCCCAAATGGCAGCATCTGATTCTCTg  
SRR944638.59244387.1+ CTCCCCAAATGGCAGCATCTGATTCTCTgt  
SRR944639.56854205.2+ CTCCCCAAATGGCAGCATCTGATTCTCTgt  
SRR944639.76938662.1+ CTCCCCAAATGGCAGCATCTGATTCTCTgt  
SRR944634.62072555.1+ CTCCCCAAATGGCAGCATCTGATTCTCTgt  
SRR944637.41203321.1+ CTCCCCAAATGGCAGGATCTGATTCTCTgtaagt  
SRR944638.71262487.1- CTCCCCAAATGGCAGCATCTGATTCTCTgtaagtt  
SRR944637.66277957.1+ CTCCCCAAATGGCAGCATCTGATTCTCTgtaagttg  
SRR944633.100415876.1- CTCCCCAAATGGCAGCATCTGATTCTCTgtaagttga  
SRR944630.28885318.1- CTCCCCAAATGGCAGCATCTGATTCTCTgtaagttgaa  
SRR944633.70260610.2- CTCCCCAAATGGCAGCATCTGATTCTCTgtaagttgaa  
SRR944633.66408716.1- CTCCCCAAATGGCAGCATCTGATTCTCTgtaagttgaac  
SRR944632.4798276.2+ CTCCCCAAATGGCAGCATCTGATTCTCTgtaagttgaaca  
SRR944633.12567580.1+ CTCCCCAAATGGCAGCATCTGATTCTCTgtaagttgaaca  
SRR944637.3204364.1- CTCCCCAAATGGCAGCATCTGATTCTCTgtaagttgaaca

SRR944630.102667012.1+ CTCCCCAAATGGCAGCATCTGATTCTCTgtaagttgaacag  
SRR944637.570564.1+ CTCCCCAAATGGCAGCATCTGCTTCTCTgtaagttgaacaga  
SRR944630.2203921.2- CTCCCCAAATGGCAGCATCTGATTCTCTgtaagttgaacagatt  
SRR944633.26132114.2- CTCCCCAAATGGCAGCATCTGATTCTCTgtaagttgaacagatttc  
SRR944635.24423685.1- CTCCCCAAATGGCAGCATCTGATTCTCTgtaagttgaacagatttc  
SRR944635.13764978.1- CTCCCCAAATGGCAGCATCTGATTCTCTgtaagttgaacagatttcct  
SRR944635.82600026.1- CTCCCCAAATGGCAGCATCTGATTCTCTgtaagttgaacagatttcctc  
SRR944635.10104664.2- CTCCCCAAATGGCAGCATCTGATTCTCTgtaagttgaacagatttcctc  
SRR944634.83589188.1+ CTCCCCAAATGGCAGCATCTGATTCTCTgtaagttgaacagatttcctcttc  
SRR944634.59210810.1+ CTCCCCAAATGGCAGCATCTGATTCTCTgtaagttgaacagatttcctcttca  
SRR944637.4770778.1+ CTCCCCAAATGGCAGCATCTGATTCTCTgtaagttgaacagatttcctcttcatcc  
SRR944637.64626416.2- CTCCCCAAATGGCAGCATCTGATTCTCTgtaagttgaacagatttcctcttcatcccc  
SRR944633.55088954.2- CTCCCCAAATGGCAGCATCTGATTCTCTgtaagttgaacagatttcctcttcatccccct  
SRR944633.72364928.1- CTCCCCAAATGGCAGCATCTGATTCTCTgtaagttgaacagatttcctcttcatccccct  
SRR944633.777688.1- CTCCCCAAATGGCAGCATCTGATTCTCTgtaagttgaacagatttcctcttcatccccct  
SRR944633.91746479.1- CTCCCCAAATGGCAGCATCTGATTCTCTgtaagttgaacagatttcctcttcatccccct  
SRR944634.36751401.1- CTCCCCAAATGGCAGCATCTGATTCTCTgtaagttgaacagatttcctcttcatccccct  
SRR944634.51557407.2+ CTCCCCAAATGGCAGCATCTGATTCTCTgtaagttgaacagatttcctcttcatccccct  
SRR944634.60100148.1+ CTCCCCAAATGGCAGCATCTGATTCTCTgtaagttgaacagatttcctcttcatccccct  
SRR944634.8289892.2- CTCCCCAAATGGCAGCATCTGATTCTCTgtaagttgaacagatttcctcttcatccccct  
SRR944635.14783008.2- CTCCCCAAATGGCAGCATCTGATTCTCTgtaagttgaacagatttcctcttcatccccct  
SRR944635.19092406.2+ CTCCCCAAATGGCAGCATCTGATTCTCTgtaagttgaacagatttcctcttcatccccct  
SRR944635.30291594.1+ CTCCCCAAATGGCAGCATCTGATTCTCTgtaagttgaacagatttcctcttcatccccct  
SRR944635.30293163.1+ CTCCCCAAATGGCAGCATCTGATTCTCTgtaagttgaacagatttcctcttcatccccct  
SRR944635.44560005.1- CTCCCCAAATGGCAGCATCTGATTCTCTgtaagttgaacagatttcctcttcatccccct  
SRR944635.5046535.1- CTCCCCAAATGGCAGCATCTGATTCTCTgtaagttgaacagatttcctcttcatccccct  
SRR944635.6485714.1- CTCCCCAAATGGCAGCATCTGATTCTCTgtaagttgaacagatttcctcttcatccccct  
SRR944635.73418382.1- CTCCCCAAATGGCAGCATCTGATTCTCTgtaagttgaacagatttcctcttcatccccct  
SRR944637.12320160.1- CTCCCCAAATGGCAGCATCTGATTCTCTgtaagttgaacagatttcctcttcatccccct  
SRR944637.40151612.2+ CTCCCCAAATGGCAGCATCTGATTCTCTgtaagttgaacagatttcctcttcatccccct  
SRR944637.8913243.2+ CTCCCCAAATGGCAGCATCTGATTCTCTgtaagttgaacagatttcctcttcatccccct  
SRR944636.71590752.2- TCCCCAAATGGCAGCATCTGATTCTCTgtaagttgaacagatttcct  
SRR944635.33395560.1- CCCCAGGGGAGCCTCTGATTCTCTgtaagttgaacagatttcctcttcatccccct  
SRR944634.1024513.1- CCCAAATGGCAGCATCTGATTCTCTgtaagttgaacagatttcctcttcatccccct  
SRR944637.50501063.1+ CCAAATGGCAGCATCTGATTCTCTgtaagttgaacagatttcctcttcatccccct  
SRR944633.22731044.2- CAAATGGCAGCATCTGATTCTCTgtaagttgaacagatttcctcttcatccccct  
SRR944633.9318354.1+ AAATGGCAGCATCTGATTCTCTgtaagttgaacagatttcctcttcatccccct  
SRR944634.62072555.2- AAATGGCAGCATCTGATTCTCTgtaagttgaacagatttcctcttcatccccct  
SRR944635.62658282.2- ATGGCAGCTGCTGATTCTCTgtaagttgaacagatttcctcttcatccccct  
SRR944637.66942762.1- ATGGCAGCATCTGATTCTCTgtaagttgaacagatttcctcttcatccccct  
SRR944630.56258503.1+ TGGCAGCATCTGATTCTCTgtaagttgaacagatttcctcttcatcccc  
SRR944633.12567580.2- TGGCAGCATCTGATTCTCTgtaagttgaacagatttcctcttcatccccct  
SRR944635.5861948.1- TGGCAGCATCTGATTCTCTgtaagttgaacagatttcctcttcatccccct  
SRR944639.41083331.2+ GGCAGCATCTGATTCTCTgtaagttgaacagatttcctcttcatcccc  
SRR944637.4900912.2- GGCAGCATCTGATTCTCTgtaagttgaacagatttcctcttcatccccct  
SRR944634.92106320.2- CAGCATCTGATTCTCTgtaagttgaacagatttcctcttcatccccct  
SRR944637.31551384.1- CAGCCTGATTCTCTgtaagttgaacagatttcctcttcatccccct  
SRR944639.81939970.2- CAGCATCTGATTCTCTgtaagttgaacagatttcctcttcatccccct  
SRR944636.70931640.2- AGCATCTGATTCTCTgtaagttgaacagatttcctcttcatccccct  
SRR944634.64662410.2+ GCATCTGATTCTCTgtaagttgaacagatttcctcttcatccccct  
SRR944635.2449031.1+ ATCTGATTCTCTgtaagttgaacagatttcctcttcatccccct  
SRR944635.31533306.1- ATCTGATTCTCTgtaagttgaacagatttcctcttcatccccct  
SRR944637.52689694.2+ ATCTGATTCTCTgtaagttgaacagatttcctcttcatccccct  
SRR944637.55178119.2+ ATCTGATTCTCTgtaagttgaacagatttcctcttcatccccct  
SRR944637.57331907.1+ ATCTGATTCTCTgtaagttgaacagatttcctcttcatccccct  
SRR944635.8222046.2- TCTGATTCTCTgtaagttgaacagatttcctcttcatccccct  
SRR944633.102269773.1+ CTGATTCTCTgtaagttgaacagatttcctcttcatccccct  
SRR944634.59210810.2- CTGATTCTCTgtaagttgaacagatttcctcttcatccccct  
SRR944633.61494335.1+ TGATTCTCTgtaagttgaacagatttcctcttcatccccct  
SRR944633.9318354.2- TGATTCTCTgtaagttgaacagatttcctcttcatccccct  
SRR944634.46413615.1+ TGATTCTCTgtaagttgaacagatttcctcttcatccccct  
SRR944636.14213886.1+ TGATTCTCTgtaagttgaacagatttcctcttcatccccct  
SRR944637.70490964.1- TGATTCTCTgtaagttgaacagatttcctcttcatccccct  
SRR944635.57447282.2+ GATTCTCTgtaagttgaacagatttcctcttcatccccct  
SRR944634.83589188.2- ATTCTCTgtaagttgaacagatttcctcttcatccccct  
SRR944635.6074553.2- ATTCTCTgtaagttgaacagatttcctcttcatccccct  
SRR944636.20771813.1- ATTCTCTgtaagttgaacagatttcctcttcatccccct  
SRR944636.66207103.1+ ATTCTCTgtaagttgaacagatttcctcttcatccccct  
SRR944637.64082347.2- ATTCTTTgtaagttgaacagatttcctcttcatccccct  
SRR944633.21943774.1+ TTCTCTgtaagttgaacagatttcctcttcatccccct  
SRR944631.16715231.2+ TCTCTgtaagttgaacagatttcctcttcatccccct  
SRR944632.123407711.2- Tgtaagttgaacagatttcctcttcatccccct  
SRR944635.60156403.2- Tgtaagttgaacagatttcctcttcatccccct

consensus

CTCCCCAAATGGCAGCATCTGATTCTCTgtaagttgaacagatttcctcttcatccccct

## C. Hooded crow (No. 4), exon 1, WGS data

- CAP3 alignment of WGS data spanning exon 1 (uppercase letters)

```

      .   :   .   :   .   :   .   :   .   :   .   :
SRR1271606.18225242.2-   tgccccgaggtgtcagcaagactcagaaaactgcagtgA
SRR1265418.3326891.1+   tgccccgaggtgtcagcaactcagaaaactgcagtgAT
SRR1265429.4576456.1-   tgccccgaggtgtcagcaagactcagaaaactgcagtgAT
SRR1271631.39804293.2-   tgccccgaggtgtcagcaagactcagaaaactgcagtgAT
SRR1271641.7006039.1-   tgccccgaggtgtcagcaagactcagaaaactgcagtgAT
SRR1265486.2988089.1+   tgccccgaggtgtcagcaagactcagaaaactgcagtgATG
SRR1266957.4360269.2-   tgccccgaggtgtcagcaagactcagaaaactgcagtgATG
SRR1265421.11833894.2-   tgccccgaggtgtcagcaagactcagaaaactgcagtgATGAT
SRR1265108.1960595.2-   tgccccgaggtgtcagcaagactcagaaaactgcagtgATGATG
SRR1265425.6191113.2-   tgccccgaggtgtcagcaagactcagaaaactgcagtgATGATG
SRR1265487.14960037.2-   tgccccgaggtgtcagcaagactcagaaaactgcagtgATGATG
SRR1266947.19667874.2-   tgccccgaggtgtcagcaagacacagaaaactgcagtgATGATG
SRR1271617.43257682.1+   tgccccgaggtgtcagcaagactcagaaaactgcagtgATGATG
SRR1271634.1326286.2-   tgccccgaggtgtcagcaagactcagaaaactgcagtgATGATG
SRR1271662.5325320.2-   tgccccgaggtgtcagcaagactcagaaaactgcagtgATGATG
SRR1269720.8521946.2+   tgccccgaggtgtcagcaagacacagaaaactgcagtgATGATGG
SRR1271628.1578656.1+   tgccccgaggtgtcagcaagactcagaaaactgcagtgATGATGG
SRR1271664.3024191.2-   tgccccgaggtgtcagcaagactcagaaaactgcagtgATGATGG
SRR1271617.67611451.2-   tgccccgaggtgtcagcaagactcagaaaactgcagtgATGATGGT
SRR1271641.2170364.2-   tgccccgaggtgtcagcaagacacagaaaactgcagtgATGATGGT
SRR1271656.41698454.2-   tgccccgaggtgtcagcaagacacagaaaactgcagtgATGATGGT
SRR1265494.6720823.1-   tgccccgaggtgtcagcaagactcagaaaactgcagtgATGATGGTG
SRR1271614.4869115.2-   tgccccgaggtgtcagcaagactcagaaaactgcagtgATGATGGTG
SRR1269721.297214.1-   tgccccgaggtgtcagcaagacacagaaaactgcagtgATGATGGTGA
SRR1271617.70351078.1+   tgccccgaggtgtcagcaagactcagaaaactgcagtgATGATGGTGA
SRR1271625.4440646.2+   tgccccgaggtgtcagcaagactcagaaaactgcagtgATGATGGTGA
SRR1265093.3579230.2-   tgccccgaggtgtcagcaagactcagaaaactgcagtgATGATGGTGAT
SRR1265425.9555102.1-   tgccccgaggtgtcagcaagactcagaaaactgcagtgATGATGGTGAT
SRR1271631.3124822.1-   tgccccgaggtgtcagcaagactcagaaaactgcagtgATGATGGTGAT
SRR1271631.31626497.1-   tgccccgaggtgtcagcaagactcagaaaactgcagtgATGATGGTGAT
SRR1271631.95991717.2-   tgccccgaggtgtcagcaagactcagaaaactgcagtgATGATGGTGAT
SRR1271660.10781231.2-   tgccccgaggtgtcagcaagactcagaaaactgcagtgATGATGGTGAT
SRR1265116.4878633.1+   tgccccgaggtgtcagcaagactcagaaaactgcagtgATGATGGTGATG
SRR1269723.13204824.1-   tgccccgaggtgtcagcaagacacagaaaactgcagtgATGATGGTGATG
SRR1271624.11221728.2+   tgccccgaggtgtcagcaagactcagaaaactgcagtgATGATGGTGATG
SRR1271631.88026372.2-   tgccccgaggtgtcagcaagactcagaaaactgcagtgATGATGGTGATG
SRR1271631.88107554.1+   tgccccgaggtgtcagcaagactcagaaaactgcagtgATGATGGTGATG
SRR1271642.3577506.1+   tgccccgaggtgtcagcaagactcagaaaactgcagtgATGATGGTGATG
SRR1265101.7450306.1+   tgccccgaggtgtcagcaagactcagaaaactgcagtgATGATGGTGATGC
SRR1265402.8168674.2-   tgccccgaggtgtcagcaagactcagaaaactgcagtgATGATGGTGATGC
SRR1271617.37836118.1-   tgccccgaggtgtcagcaagactcagaaaactgcagtgATGATGGTGATGC
SRR1271642.3018005.1+   tgccccgaggtgtcagcaagactcagaaaactgcagtgATGATGGTGATGC
SRR1265425.3746284.2-   tgccccgaggtgtcagcaagactcagaaaactgcagtgATGATGGTGATGCT
SRR1265486.14250218.1-   tgccccgaggtgtcagcaagactcagaaaactgcagtgATGATGGTGATGCT
SRR1265960.19147369.2-   tgccccgaggtgtcagcaagactcagaaaactgcagtgATGATGGTGATGCT
SRR1269721.4085403.2+   tgccccgaggtgtcagcaagacacagaaaactgcagtgATGATGGTGATGCT
SRR1271605.9271138.2-   tgccccgaggtgtcagcaagactcagaaaactgcagtgATGATGGTGATGCT
SRR1271660.204492.1+   tgccccgaggtgtcagcaagactcagaaaactgcagtgATGATGGAGATGCT
SRR1265423.1464723.1+   tgccccgaggtgtcagcaagactcagaaaactgcagtgATGATGGTGATGCTCT
SRR1266947.23270046.1+   tgccccgaggtgtcagcaagacacagaaaactgcagtgATGATGGTGATGCTCT
SRR1271628.2167064.2-   tgccccgaggtgtcagcaagactcagaaaactgcagtgATGATGGTGATGCTCT
SRR1271631.31329934.2-   tgccccgaggtgtcagcaagactcagaaaactgcagtgATGATGGTGATGCTCT
SRR1271637.3241382.2+   tgccccgaggtgtcagcaagactcagaaaactgcagtgATGATGGGGATGCTCT
SRR1265961.10160280.2-   tgccccgaggtgtcagcaagactcagaaaactgcagtgATGATGGTGATGCTCTT
SRR1266947.12369096.2-   tgccccgaggtgtcagcaagacacagaaaactgcagtgATGATGGTGATGCTCTT
SRR1266956.668321.1-   tgccccgaggtgtcagcaagacacagaaaactgcagtgATGATGGTGATGCTCTT
SRR1266962.10827261.1-   tgccccgaggtgtcagcaagactcagaaaactgcagtgATGATGGTGATGCTCTT
SRR1271642.249531.1+   tgccccgaggtgtcagcaagactcagaaaactgcagtgATGATGGTGATGCTCTT
SRR1271665.3197988.1+   tgccccgaggtgtcagcaagactcagaaaactgcagtgATGATGGTGATGCTCTT
SRR1265107.4659856.2-   tgccccgaggtgtcagcaagactcagaaaactgcagtgATGATGGTGATGCTCTTC
SRR1269727.11297167.1-   tgccccgaggtgtcagcaagactcagaaaactgcagtgATGATGGTGATGCTCTTC
SRR1271626.39747880.1+   tgccccgaggtgtcagcaagactcagaaaactgcagtgATGATGGTGATGCTCTTC
SRR1266956.2653211.1+   tgccccgaggtgtcagcaagactcagaaaactgcagtgATGATGGTGATGCTCTTCT
SRR1269690.2995201.1-   tgccccgaggtgtcagcaagactcagaaaactgcagtgATGATGGTGATGCTCTTCT
SRR1269699.1770369.1-   tgccccgaggtgtcagcaagacacagaaaactgcagtgATGATGGTGATGCTCTTCT
SRR1271633.1518080.1-   tgccccgaggtgtcagcaagactcagaaaactgcagtgATGATGGTGATGCTCTTCT
SRR1271656.16279216.1-   tgccccgaggtgtcagcaagactcagaaaactgcagtgATGATGGTGATGCTCTTCT
SRR1266948.11632586.1-   tgccccgaggtgtcagcaagactcagaaaactgcagtgATGATGGTGATGCTCTTCTC
SRR1269695.4227406.1-   tgccccgaggtgtcagcaagactcagaaaactgcagtgATGATGGTGATGCTCTTCTC
SRR1271631.75576578.2+   tgccccgaggtgtcagcaagactcagaaaactgcagtgATGATGGTGATGCTCTTCTC
SRR1265102.6323108.1-   tgccccgaggtgtcagcaagactcagaaaactgcagtgATGATGGTGATGCTCTTCTCA
SRR1265421.26066836.2-   tgccccgaggtgtcagcaaggctcagaaaactgcagtgATGATGGTGATGCTCTTCTCA
SRR1271611.53197193.1-   tgccccgaggtgtcagcaagactcagaaaactgcagtgATGATGGTGATGCTCTTCTCA
SRR1271656.31699611.1+   tgccccgaggtgtcagcaagactcagaaaactgcagtgATGATGGTGATGCTCTTCTCA
SRR1271661.4142288.1-   tgccccgaggtgtcagcaagactcagaaaactgcagtgATGATGGTGATGCTCTTCTCA

```

SRR1271620.12588857.1- tgcccaggtgtcagcaagactcagaaactgcagtGATGATGGTGATGCTCTTCTCAG  
SRR1271626.10299387.1+ tgcccaggtgtcagcaagactcagaaactgcagtGATGATGGTGATGCTCTTCTCAG  
SRR1271631.77415545.2- tgcccaggtgtcagcaagactcagaaactgcagtGATGATGGTGATGCTCTTCTCAG  
SRR1265094.790368.2+ tgcccaggtgtcagcaagactcagaaactgcagtGATGATGGTGATGCTCTTCTCAGG  
SRR1265492.5585323.1+ tgcccaggtgtcagcaagactcagaaactgcagtGATGATGGTGATGCTCTTCTCAGG  
SRR1265959.4685497.2+ tgcccaggtgtcagcaagactcagaaactgcagtGATGATGGTGATGCTCTTCTCAGG  
SRR1269696.5605733.1+ tgcccaggtgtcagcaagactcagaaactgcagtGATGATGGTGATGCTCTTCTCAGG  
SRR1271617.28309534.1- tgcccaggtgtcagcaagactcagaaactgcagtGATGATGGTGATGCTCTTCTCAGG  
SRR1271636.12517782.2+ tgcccaggtgtcagcaagactcagaaactgcagtGATGATGGTGATGCTCTTCTCAGG  
SRR1265091.7293804.2+ tgcccaggtgtcagcaagactcagaaactgcagtGATGATGGTGATGCTCTTCTCAGGG  
SRR1265092.8008049.2- tgcccaggtgtcagcaagactcagaaactgcagtGATGATGGTGATGCTCTTCTCAGGG  
SRR1265094.1737834.1- tgcccaggtgtcagcaagactcagaaactgcagtGATGATGGTGATGCTCTTCTCAGGG  
SRR1265100.7029791.1+ tgcccaggtgtcagcaagactcagaaactgcagtGATGATGGTGATGCTCTTCTCAGGG  
SRR1265103.985070.1+ tgcccaggtgtcagcaagactcagaaactgcagtGATGATGGTGATGCTCTTCTCAGGG  
SRR1265107.1205589.1+ tgcccaggtgtcagcaagactcagaaactgcagtGATGATGGTGATGCTCTTCTCAGGG  
SRR1265107.5946926.1+ tgcccaggtgtcagcaagactcagaaactgcagtGATGATGGTGATGCTCTTCTCAGGG  
SRR1265108.3192987.1- tgcccaggtgtcagcaagactcagaaactgcagtGATGATGGTGATGCTCTTCTCAGGG  
SRR1265108.9817332.2- tgcccaggtgtcagcaaggtcagaaactgcagtGATGATGGTGATGCTCTTCTCAGGG  
SRR1265116.9489829.1- tgcccaggtgtcagcaagactcagaaactgcagtGATGATGGTGATGCTCTTCTCAGGG  
SRR1265117.5894445.1- tgcccaggtgtcagcaagactcagaaactgcagtGATGATGGTGATGCTCTTCTCAGGG  
SRR1265117.8111828.1+ tgcccaggtgtcagcaagactcagaaactgcagtGATGATGGTGATGCTCTTCTCAGGG  
SRR1265120.12719577.1+ tgcccaggtgtcagcaagactcagaaactgcagtGATGATGGTGATGCTCTTCTCAGGG  
SRR1265419.5834061.1+ tgcccaggtgtcagcaagactcagaaactgcagtGATGATGGTGATGCTCTTCTCAGGG  
SRR1265419.9630529.2+ tgcccaggtgtcagcaagactcagaaactgcagtGATGATGGTGATGCTCTTCTCAGGG  
SRR1265419.9760671.2+ tgcccaggtgtcagcaagactcagaaactgcagtGATGATGGTGATGCTCTTCTCAGGG  
SRR1265420.8209771.1+ tgcccaggtgtcagcaagactcagaaactgcagtGATGATGGTGATGCTCTTCTCAGGG  
SRR1265420.8458569.1+ tgcccaggtgtcagcaagactcagaaactgcagtGATGATGGTGATGCTCTTCTCAGGG  
SRR1265420.96711347.2- tgcccaggtgtcagcaagactcagaaactgcagtGATGATGGTGATGCTCTTCTCAGGG  
SRR1265421.22002067.1+ tgcccaggtgtcagcaagactcagaaactgcagtGATGATGGTGATGCTCTTCTCAGGG  
SRR1265422.16304480.2+ tgcccaggtgtcagcaagactcagaaactgcagtGATGATGGTGATGCTCTTCTCAGGG  
SRR1265423.8357279.2- tgcccaggtgtcagcaagactcagaaactgcagtGATGATGGTGATGCTCTTCTCAGGG  
SRR1265425.3715610.1- tgcccaggtgtcagcaagactcagaaactgcagtGATGATGGTGATGCTCTTCTCAGGG  
SRR1265427.10252303.2+ tgcccaggtgtcagcaagactcagaaactgcagtGATGATGGTGATGCTCTTCTCAGGG  
SRR1265427.143510.1- tgcccaggtgtcagcaagactcagaaactgcagtGATGATGGTGATGCTCTTCTCAGGG  
SRR1265429.13415617.2+ tgcccaggtgtcagcaagactcagaaactgcagtGATGATGGTGATGCTCTTCTCAGGG  
SRR1265429.1518485.1+ tgcccaggtgtcagcaagactcagaaactgcagtGATGATGGTGATGCTCTTCTCAGGG  
SRR1265485.7131594.1- tgcccaggtgtcagcaagactcagaaactgcagtGATGATGGTGATGCTCTTCTCAGGG  
SRR1265486.14296408.1- tgcccaggtgtcagcaagactcagaaactgcagtGATGATGGTGATGCTCTTCTCAGGG  
SRR1265486.16127387.1- tgcccaggtgtcagcaagactcagaaactgcagtGATGATGGTGATGCTCTTCTCAGGG  
SRR1265486.4188250.2- tgcccaggtgtcagcaagactcagaaactgcagtGATGATGGTGATGCTCTTCTCAGGG  
SRR1265486.5317212.2- tgcccaggtgtcagcaagactcagaaactgcagtGATGATGGTGATGCTCTTCTCAGGG  
SRR1265487.3611936.1+ tgcccaggtgtcagcaagactcagaaactgcagtGATGATGGTGATGCTCTTCTCAGGG  
SRR1265490.6979773.2- tgcccaggtgtcagcaagactcagaaactgcagtGATGATGGTGATGCTCTTCTCAGGG  
SRR1265492.1503780.2- tgcccaggtgtcagcaagactcagaaactgcagtGATGATGGTGATGCTCTTCTCAGGG  
SRR1265492.2995376.1- tgcccaggtgtcagcaagactcagaaactgcagtGATGATGGTGATGCTCTTCTCAGGG  
SRR1265492.6404320.2+ tgcccaggtgtcagcaagactcagaaactgcagtGATGATGGTGATGCTCTTCTCAGGG  
SRR1265959.10232564.2- tgcccaggtgtcagcaagactcagaaactgcagtGATGATGGTGATGCTCTTCTCAGGG  
SRR1265961.17164072.2+ tgcccaggtgtcagcaagactcagaaactgcagtGATGATGGTGATGCTCTTCTCAGGG  
SRR1265961.20492731.2- tgcccaggtgtcagcaagactcagaaactgcagtGATGATGGTGATGCTCTTCTCAGGG  
SRR1265961.5907868.2- tgcccaggtgtcagcaagactcagaaactgcagtGATGATGGTGATGCTCTTCTCAGGG  
SRR1265962.10464106.1+ tgcccaggtgtcagcaagactcagaaactgcagtGATGATGGTGATGCTCTTCTCAGGG  
SRR1265962.6217934.1+ tgcccaggtgtcagcaagactcagaaactgcagtGATGATGGTGATGCTCTTCTCAGGG  
SRR1266947.12676414.2- tgcccaggtgtcagcaagactcagaaactgcagtGATGATGGTGATGCTCTTCTCAGGG  
SRR1266949.3696068.1- tgcccaggtgtcagcaagacacagaaactgcagtGATGATGGTGATGCTCTTCTCAGGG  
SRR1266949.9294787.1+ tgcccaggtgtcagcaagacacagaaactgcagtGATGATGGTGATGCTCTTCTCAGGG  
SRR1266952.1269097.2- tgcccaggtgtcagcaagactcagaaactgcagtGATGATGGTGATGCTCTTCTCAGGG  
SRR1266952.18524365.1- tgcccaggtgtcagcaagactcagaaactgcagtGATGATGGTGATGCTCTTCTCAGGG  
SRR1266956.5970423.2- tgcccaggtgtcagcaagactcagaaactgcagtGATGATGGTGATGCTCTTCTCAGGG  
SRR1266957.1004692.2+ tgcccaggtgtcagcaagacacagaaactgcagtGATGATGGTGATGCTCTTCTCAGGG  
SRR1266957.3246519.1+ tgcccaggtgtcagcaagactcagaaactgcagtGATGATGGTGATGCTCTTCTCAGGG  
SRR1266959.12079654.1- tgcccaggtgtcagcaagacacagaaactgcagtGATGATGGTGATGCTCTTCTCAGGG  
SRR1266960.9103031.1- tgcccaggtgtcagcaagactcagaaactgcagtGATGATGGTGATGCTCTTCTCAGGG  
SRR1266961.140544.1+ tgcccaggtgtcagcaagacacagaaactgcagtGATGATGGTGATGCTCTTCTCAGGG  
SRR1266961.2852570.2- tgcccaggtgtcagcaagactcagaaactgcagtGATGATGGTGATGCTCTTCTCAGGG  
SRR1266962.3776588.2+ tgcccaggtgtcagcaagactcagaaactgcagtGATGATGGTGATGCTCTTCTCAGGG  
SRR1266963.14458810.2- tgcccaggtgtcagcaagactcagaaactgcagtGATGATGGTGATGCTCTTCTCAGGG  
SRR1266964.8313196.1- tgcccaggtgtcagcaagactcagaaactgcagtGATGATGGTGATGCTCTTCTCAGGG  
SRR1266964.9455231.1- tgcccaggtgtcagcaagactcagaaactgcagtGATGATGGTGATGCTCTTCTCAGGG  
SRR1266965.7238566.2- tgcccaggtgtcagcaagactcagaaactgcagtGATGATGGTGATGCTCTTCTCAGGG  
SRR1266966.3487586.1+ tgcccaggtgtcagcaagactcagaaactgcagtGATGATGGTGATGCTCTTCTCAGGG  
SRR1269689.12646918.2- tgcccaggtgtcagcaagactcagaaactgcagtGATGATGGTGATGCTCTTCTCAGGG  
SRR1269689.6208067.2- tgcccaggtgtcagcaagactcagaaactgcagtGATGATGGTGATGCTCTTCTCAGGG  
SRR1269690.2081589.2+ tgcccaggtgtcagcaagactcagaaactgcagtGATGATGGTGATGCTCTTCTCAGGG  
SRR1269691.2790772.1+ tgcccaggtgtcagcaagactcagaaactgcagtGATGATGGTGATGCTCTTCTCAGGG  
SRR1269691.4350208.1+ tgcccaggtgtcagcaagactcagaaactgcagtGATGATGGTGATGCTCTTCTCAGGG  
SRR1269691.4350208.2- tgcccaggtgtcagcaagactcagaaactgcagtGATGATGGTGATGCTCTTCTCAGGG  
SRR1269693.7819029.1- tgcccaggtgtcagcaagactcagaaactgcagtGATGATGGTGATGCTCTTCTCAGGG  
SRR1269694.4040988.2- tgcccaggtgtcagcaagactcagaaactgcagtGATGATGGTGATGCTCTTCTCAGGG  
SRR1269694.9908338.2+ tgcccaggtgtcagcaagactcagaaactgcagtGATGATGGTGATGCTCTTCTCAGGG  
SRR1269697.3282854.1- tgcccaggtgtcagcaagactcagaaactgcagtGATGATGGTGATGCTCTTCTCAGGG  
SRR1269699.10407563.2- tgcccaggtgtcagcaagacacagaaactgcagtGATGATGGTGATGCTCTTCTCAGGG  
SRR1269700.5425205.1- tgcccaggtgtcagcaagacacagaaactgcagtGATGATGGTGATGCTCTTCTCAGGG  
SRR1269702.9206585.2+ tgcccaggtgtcagcaagacacagaaactgcagtGATGATGGTGATGCTCTTCTCAGGG  
SRR1269721.4648312.1+ tgcccaggtgtcagcaagacacagaaactgcagtGATGATGGTGATGCTCTTCTCAGGG

SRR1269724.10149594.1+ tgccccgaggtgtcagcaagactcagaaaactgcagtgATGATGGTGATGCTCTTCTCAGGG  
SRR1269724.10149594.2- tgccccgaggtgtcagcaagactcagaaaactgcagtgATGATGGTGATGCTCTTCTCAGGG  
SRR1269725.4281425.1+ tgccccgaggtgtcagcaagactcagaaaactgcagtgATGATGGTGATGCTCTTCTCAGGG  
SRR1269727.8305397.1+ tgccccgaggtgtcagcaagactcagaaaactgcagtgATGATGGTGATGCTCTTCTCAGGG  
SRR1271606.2596332.2+ tgccccgaggtgtcagcaagactcagaaaactgcagtgATGATGGTGATGCTCTTCTCAGGG  
SRR1271606.4361690.2- tgccccgaggtgtcagcaagactcagaaaactgcagtgATGATGGTGATGCTCTTCTCAGGG  
SRR1271611.10904168.2- tgccccgaggtgtcagcaagactcagaaaactgcagtgATGATGGTGATGCTCTTCTCAGGG  
SRR1271611.35773627.2- tgccccgaggtgtcagcaagactcagaaaactgcagtgATGATGGTGATGCTCTTCTCAGGG  
SRR1271611.37255256.2- tgccccgaggtgtcagcaagactcagaaaactgcagtgATGATGGTGATGCTCTTCTCAGGG  
SRR1271611.44404236.2- tgccccgaggtgtcagcaagactcagaaaactgcagtgATGATGGTGATGCTCTTCTCAGGG  
SRR1271611.58180054.1+ tgccccgaggtgtcagcaagactcagaaaactgcagtgATGATGGTGATGCTCTTCTCAGGG  
SRR1271611.8284106.1+ tgccccgaggtgtcagcaagactcagaaaactgcagtgATGATGGTGATGCTCTTCTCAGGG  
SRR1271612.1636746.1+ tgccccgaggtgtcagcaagactcagaaaactgcagtgATGATGGTGATGCTCTTCTCAGGG  
SRR1271612.6155372.1- tgccccgaggtgtcagcaagactcagaaaactgcagtgATGATGGTGATGCTCTTCTCAGGG  
SRR1271616.8117819.1- tgccccgaggtgtcagcaagactcagaaaactgcagtgATGATGGTGATGCTCTTCTCAGGG  
SRR1271617.2641915.1+ tgccccgaggtgtcagcaagactcagaaaactgcagtgATGATGGTGATGCTCTTCTCAGGG  
SRR1271617.61779939.1- tgccccgaggtgtcagcaagactcagaaaactgcagtgATGATGGTGATGCTCTTCTCAGGG  
SRR1271617.63603202.2- tgccccgaggtgtcagcaagactcagaaaactgcagtgATGATGGTGATGCTCTTCTCAGGG  
SRR1271617.9057728.1+ tgccccgaggtgtcagcaagactcagaaaactgcagtgATGATGGTGATGCTCTTCTCAGGG  
SRR1271617.91836522.2- tgccccgaggtgtcagcaagactcagaaaactgcagtgATGATGGTGATGCTCTTCTCAGGG  
SRR1271618.2332801.2- tgccccgaggtgtcagcaagactcagaaaactgcagtgATGATGGTGATGCTCTTCTCAGGG  
SRR1271619.11721387.2+ tgccccgaggtgtcagcaagactcagaaaactgcagtgATGATGGTGATGCTCTTCTCAGGG  
SRR1271619.5245116.1+ tgccccgaggtgtcagcaagactcagaaaactgcagtgATGATGGTGATGCTCTTCTCAGGG  
SRR1271620.7033507.1- tgccccgaggtgtcagcaagactcagaaaactgcagtgATGATGGTGATGCTCTTCTCAGGG  
SRR1271620.7196430.1- tgccccgaggtgtcagcaagactcagaaaactgcagtgATGATGGTGATGCTCTTCTCAGGG  
SRR1271621.604681.2- tgccccgaggtgtcagcaagactcagaaaactgcagtgATGATGGTGATGCTCTTCTCAGGG  
SRR1271623.13311270.2- tgccccgaggtgtcagcaagactcagaaaactgcagtgATGATGGTGATGCTCTTCTCAGGG  
SRR1271624.16956133.2- tgccccgaggtgtcagcaagactcagaaaactgcagtgATGATGGTGATGCTCTTCTCAGGG  
SRR1271624.17619079.2- tgccccgaggtgtcagcaagactcagaaaactgcagtgATGATGGTGATGCTCTTCTCAGGG  
SRR1271624.3358682.1+ tgccccgaggtgtcagcaagactcagaaaactgcagtgATGATGGTGATGCTCTTCTCAGGG  
SRR1271624.5552917.2+ tgccccgaggtgtcagcaagactcagaaaactgcagtgATGATGGTGATGCTCTTCTCAGGG  
SRR1271626.1129978.1- tgccccgaggtgtcagcaagactcagaaaactgcagtgATGATGGTGATGCTCTTCTCAGGG  
SRR1271626.15408811.1- tgccccgaggtgtcagcaagactcagaaaactgcagtgATGATGGTGATGCTCTTCTCAGGG  
SRR1271626.15519384.2+ tgccccgaggtgtcagcaagactcagaaaactgcagtgATGATGGTGATGCTCTTCTCAGGG  
SRR1271626.18186673.1- tgccccgaggtgtcagcaagactcagaaaactgcagtgATGATGGTGATGCTCTTCTCAGGG  
SRR1271626.23923475.2+ tgccccgaggtgtcagcaagactcagaaaactgcagtgATGATGGTGATGCTCTTCTCAGGG  
SRR1271626.39792399.1- tgccccgaggtgtcagcaagactcagaaaactgcagtgATGATGGTGATGCTCTTCTCAGGG  
SRR1271628.74690.2+ tgccccgaggtgtcagcaagactcagaaaactgcagtgATGATGGTGATGCTCTTCTCAGGG  
SRR1271628.8325711.2- tgccccgaggtgtcagcaagactcagaaaactgcagtgATGATGGTGATGCTCTTCTCAGGG  
SRR1271630.5638436.1- tgccccgaggtgtcagcaagactcagaaaactgcagtgATGATGGTGATGCTCTTCTCAGGG  
SRR1271630.6944205.2+ tgccccgaggtgtcagcaagactcagaaaactgcagtgATGATGGTGATGCTCTTCTCAGGG  
SRR1271631.104145897.1+ tgccccgaggtgtcagcaagactcagaaaactgcagtgATGATGGTGATGCTCTTCTCAGGG  
SRR1271631.116517047.2- tgccccgaggtgtcagcaagactcagaaaactgcagtgATGATGGTGATGCTCTTCTCAGGG  
SRR1271631.15126426.1- tgccccgaggtgtcagcaagactcagaaaactgcagtgATGATGGTGATGCTCTTCTCAGGG  
SRR1271631.29333027.2- tgccccgaggtgtcagcaagactcagaaaactgcagtgATGATGGTGATGCTCTTCTCAGGG  
SRR1271631.51751938.2+ tgccccgaggtgtcagcaagactcagaaaactgcagtgATGATGGTGATGCTCTTCTCAGGG  
SRR1271631.53104753.1+ tgccccgaggtgtcagcaagactcagaaaactgcagtgATGATGGTGATGCTCTTCTCAGGG  
SRR1271631.54114509.1- tgccccgaggtgtcagcaagactcagaaaactgcagtgATGATGGTGATGCTCTTCTCAGGG  
SRR1271631.60482848.2+ tgccccgaggtgtcagcaagactcagaaaactgcagtgATGATGGTGATGCTCTTCTCAGGG  
SRR1271631.75535824.1+ tgccccgaggtgtcagcaagactcagaaaactgcagtgATGATGGTGATGCTCTTCTCAGGG  
SRR1271631.75871170.1- tgccccgaggtgtcagcaagactcagaaaactgcagtgATGATGGTGATGCTCTTCTCAGGG  
SRR1271631.78235890.2+ tgccccgaggtgtcagcaagactcagaaaactgcagtgATGATGGTGATGCTCTTCTCAGGG  
SRR1271631.7995179.2+ tgccccgaggtgtcagcaagactcagaaaactgcagtgATGATGGTGATGCTCTTCTCAGGG  
SRR1271631.96785903.1- tgccccgaggtgtcagcaagactcagaaaactgcagtgATGATGGTGATGCTCTTCTCAGGG  
SRR1271635.2853328.1- tgccccgaggtgtcagcaagactcagaaaactgcagtgATGATGGTGATGCTCTTCTCAGGG  
SRR1271636.10973309.2+ tgccccgaggtgtcagcaagactcagaaaactgcagtgATGATGGTGATGCTCTTCTCAGGG  
SRR1271636.22676106.2- tgccccgaggtgtcagcaagactcagaaaactgcagtgATGATGGTGATGCTCTTCTCAGGG  
SRR1271636.29905606.2- tgccccgaggtgtcagcaagactcagaaaactgcagtgATGATGGTGATGCTCTTCTCAGGG  
SRR1271636.7067284.1+ tgccccgaggtgtcagcaagactcagaaaactgcagtgATGATGGTGATGCTCTTCTCAGGG  
SRR1271637.7917479.2+ tgccccgaggtgtcagcaagactcagaaaactgcagtgATGATGGTGATGCTCTTCTCAGGG  
SRR1271638.16782324.2- tgccccgaggtgtcagcaagactcagaaaactgcagtgATGATGGTGATGCTCTTCTCAGGG  
SRR1271638.4121191.2- tgccccgaggtgtcagcaagactcagaaaactgcagtgATGATGGTGATGCTCTTCTCAGGG  
SRR1271639.5769975.2+ tgccccgaggtgtcagcaagactcagaaaactgcagtgATGATGGTGATGCTCTTCTCAGGG  
SRR1271640.3286459.2- tgccccgaggtgtcagcaagactcagaaaactgcagtgATGATGGTGATGCTCTTCTCAGGG  
SRR1271641.1828285.2+ tgccccgaggtgtcagcaagactcagaaaactgcagtgATGATGGTGATGCTCTTCTCAGGG  
SRR1271641.4994077.1- tgccccgaggtgtcagcaagactcagaaaactgcagtgATGATGGTGATGCTCTTCTCAGGG  
SRR1271641.5711711.1+ tgccccgaggtgtcagcaagactcagaaaactgcagtgATGATGGTGATGCTCTTCTCAGGG  
SRR1271641.8508693.1- tgccccgaggtgtcagcaagactcagaaaactgcagtgATGATGGTGATGCTCTTCTCAGGG  
SRR1271644.6211925.2+ tgccccgaggtgtcagcaagactcagaaaactgcagtgATGATGGTGATGCTCTTCTCAGGG  
SRR1271656.14780067.1- tgccccgaggtgtcagcaagactcagaaaactgcagtgATGATGGTGATGCTCTTCTCAGGG  
SRR1271656.32340673.1- tgccccgaggtgtcagcaagactcagaaaactgcagtgATGATGGTGATGCTCTTCTCAGGG  
SRR1271656.37726636.2+ tgccccgaggtgtcagcaagactcagaaaactgcagtgATGATGGTGATGCTCTTCTCAGGG  
SRR1271656.40813652.1+ tgccccgaggtgtcagcaagactcagaaaactgcagtgATGATGGTGATGCTCTTCTCAGGG  
SRR1271656.45546724.1- tgccccgaggtgtcagcaagactcagaaaactgcagtgATGATGGTGATGCTCTTCTCAGGG  
SRR1271656.45740696.2+ tgccccgaggtgtcagcaagactcagaaaactgcagtgATGATGGTGATGCTCTTCTCAGGG  
SRR1271656.51406426.2- tgccccgaggtgtcagcaagactcagaaaactgcagtgATGATGGTGATGCTCTTCTCAGGG  
SRR1271660.15638503.1+ tgccccgaggtgtcagcaagactcagaaaactgcagtgATGATGGTGATGCTCTTCTCAGGG  
SRR1271660.22996263.2- tgccccgaggtgtcagcaagactcagaaaactgcagtgATGATGGTGATGCTCTTCTCAGGG  
SRR1271661.7415342.1- tgccccgaggtgtcagcaagactcagaaaactgcagtgATGATGGTGATGCTCTTCTCAGGG  
SRR1271661.7471914.1+ tgccccgaggtgtcagcaagactcagaaaactgcagtgATGATGGTGATGCTCTTCTCAGGG  
SRR1271661.7818147.1+ tgccccgaggtgtcagcaagactcagaaaactgcagtgATGATGGTGATGCTCTTCTCAGGG  
SRR1271664.6779123.1+ tgccccgaggtgtcagcaagactcagaaaactgcagtgATGATGGTGATGCTCTTCTCAGGG  
SRR1271665.12472605.2- tgccccgaggtgtcagcaagactcagaaaactgcagtgATGATGGTGATGCTCTTCTCAGGG  
SRR1271665.4483121.1- tgccccgaggtgtcagcaagactcagaaaactgcagtgATGATGGTGATGCTCTTCTCAGGG

SRR1265421.3532440.1- gcccaggtgtcagcaagactcagaaaactgcagtGATGATGGTATGCTCTTCTCAGGG  
SRR1266951.538073.2+ gcccaggtgtcagcaagactcagaaaactgcagtGATGATGGTATGCTCTTCTCAGGG  
SRR1266961.140544.2- ccccaggtgtcagcaagactcagaaaactgcagtGATGATGGTATGCTCTTCTCAGGG  
SRR1265959.14596287.2+ ccccaggtgtcagcaagactcagaaaactgcagtGATGATGGTATGCTCTTCTCAGGG  
SRR1266948.20090114.2- ccccaggtgtcagcaagactcagaaaactgcagtGATGATGGTATGCTCTTCTCAGGG  
SRR1265429.4871220.2- cccaggtgtcagcaagactcagaaaactgcagtGATGATGGTATGCTCTTCTCAGGG  
SRR1271612.777884.2- cgaggtgtcagcaagactcagaaaactgcagtGATGATGGTATGCTCTTCTCAGGG  
SRR1265485.4295901.1+ gaggtgtcagcaagactcagaaaactgcagtGATGATGGTATGCTCTTCTCAGGG  
SRR1266953.6459693.2- gaggtgtcagcaagactcagaaaactgcagtGATGATGGTATGCTCTTCTCAGGG  
SRR1266955.9340457.2+ gaggtgtcagcaagactcagaaaactgcagtGATGATGGTATGCTCTTCTCAGGG  
SRR1266960.7618362.2+ gaggtgtcagcaagactcagaaaactgcagtGATGATGGTATGCTCTTCTCAGGG  
SRR1266960.863619.1+ gaggtgtcagcaagactcagaaaactgcagtGATGATGGTATGCTCTTCTCAGGG  
SRR1271611.51705152.2+ gaggtgtcagcaagactcagaaaactgcagtGATGATGGTATGCTCTTCTCAGGG  
SRR1271620.10933616.1+ gaggtgtcagcaagactcagaaaactgcagtGATGATGGTATGCTCTTCTCAGGG  
SRR1271626.5381257.2+ gaggtgtcagcaagactcagaaaactgcagtGATGATGGTATGCTCTTCTCAGGG  
SRR1265430.10056360.2+ aggtgtcagcaagactcagaaaactgcagtGATGATGGTATGCTCTTCTCAGGG  
SRR1271656.21063060.2+ aggtgtcagcaagactcagaaaactgcagtGATGATGGTATGCTCTTCTCAGGG  
SRR1265961.21125338.1+ ggtgtcagcaagactcagaaaactgcagtGATGATGGTATGCTCTTCTCAGGG  
SRR1266964.9037991.2- ggtgtcagcaagactcagaaaactgcagtGATGATGGTATGCTCTTCTCAGGG  
SRR1271617.107030387.1- ggtgtcagcaagactcagaaaactgcagtGATGATGGTATGCTCTTCTCAGGG  
SRR1271664.9315059.2+ ggtgtcagcaagactcagaaaactgcagtGATGATGGTATGCTCTTCTCAGGG  
SRR1265108.11035394.1+ gtgtcagcaagactcagaaaactgcagtGATGATGGTATGCTCTTCTCAGGG  
SRR1265425.8225295.2+ gtgtcagcaagactcagaaaactgcagtGATGATGGTATGCTCTTCTCAGGG  
SRR1269700.383429.2+ gtgtcagcaagactcagaaaactgcagtGATGATGGTATGCTCTTCTCAGGG  
SRR1271626.30577518.1- gtgtcagcaagactcagaaaactgcagtGATGATGGTATGCTCTTCTCAGGG  
SRR1265492.3432458.1+ tgtcagcaagactcagaaaactgcagtGATGATGGTATGCTCTTCTCAGGG  
SRR1266954.5286348.2- tgtcagcaagactcagaaaactgcagtGATGATGGTATGCTCTTCTCAGGG  
SRR1266962.1283028.2- tgtcagcaagactcagaaaactgcagtGATGATGGTATGCTCTTCTCAGGG  
SRR1271631.18001001.2- tgtcagcaagactcagaaaactgcagtGATGATGGTATGCTCTTCTCAGGG  
SRR1266951.9077736.1- gtcagcaagactcagaaaactgcagtGATGATGGTATGCTCTTCTCAGGG  
SRR1266959.5837465.2+ gtcagcaagactcagaaaactgcagtGATGATGGTATGCTCTTCTCAGGG  
SRR1266961.10240545.2- gtcagcaagactcagaaaactgcagtGATGATGGTATGCTCTTCTCAGGG  
SRR1271617.13985324.1- gtcagcaagactcagaaaactgcagtGATGATGGTATGCTCTTCTCAGGG  
SRR1271635.2818304.1- tcagcaagactcagaaaactgcagtGATGATGGTATGCTCTTCTCAGGG  
SRR1265960.10540450.1+ cagcaagactcagaaaactgcagtGATGATGGTATGCTCTTCTCAGGG  
SRR1269723.820781.2+ cagcaagactcagaaaactgcagtGATGATGGTATGCTCTTCTCAGGG  
SRR1271606.5849136.2+ cagcaagactcagaaaactgcagtGATGATGGTATGCTCTTCTCAGGG  
SRR1265120.5268240.2+ agcaagactcagaaaactgcagtGATGATGGTATGCTCTTCTCAGGG  
SRR1265421.25226457.2+ agcaagactcagaaaactgcagtGATGATGGTATGCTCTTCTCAGGG  
SRR1271605.16567794.1+ agcaagactcagaaaactgcagtGATGATGGTATGCTCTTCTCAGGG  
SRR1266966.13263794.2- gcaagactcagaaaactgcagtGATGATGGTATGCTCTTCTCAGGG  
SRR1269721.8669041.1+ gcaagactcagaaaactgcagtGATGATGGTATGCTCTTCTCAGGG  
SRR1271656.20184311.1+ gcaagactcagaaaactgcagtGATGATGGTATGCTCTTCTCAGGG  
SRR1271656.31545570.2+ gcaagactcagaaaactgcagtGATGATGGTATGCTCTTCTCAGGG  
SRR1271611.40265863.2+ caagactcagaaaactgcagtGATGATGGTATGCTCTTCTCAGGG  
SRR1271641.8238182.2+ aagactcagaaaactgcagtGATGATGGTATGCTCTTCTCAGGG  
SRR1271665.16214124.1+ aagactcagaaaactgcagtGATGATGGTATGCTCTTCTCAGGG  
SRR1271631.53790917.2+ agactcagaaaactgcagtGATGATGGTATGCTCTTCTCAGGG  
SRR1271636.20236431.2+ agactcagaaaactgcagtGATGATGGTATGCTCTTCTCAGGG  
SRR1265424.13096215.1+ gactcagaaaactgcagtGATGATGGTATGCTCTTCTCAGGG  
SRR1269694.10704014.2- gactcagaaaactgcagtGATGATGGTATGCTCTTCTCAGGG  
SRR1271618.4133814.1- gactcagaaaactgcagtGATGATGGTATGCTCTTCTCAGGG  
SRR1271631.61406029.2+ gactcagaaaactgcagtGATGATGGTATGCTCTTCTCAGGG  
SRR1271611.1989144.2+ actcagaaaactgcagtGATGATGGTATGCTCTTCTCAGGG  
SRR1271626.12852273.2- actcagaaaactgcagtGATGATGGTATGCTCTTCTCAGGG  
SRR1271626.6889032.2- actcagaaaactgcagtGATGATGGTATGCTCTTCTCAGGG  
SRR1271637.7730229.1+ actcagaaaactgcagtGATGATGGTATGCTCTTCTCAGGG  
SRR1266953.271055.1- ctccagaaaactgcagtGATGATGGTATGCTCTTCTCAGGG  
SRR1271642.3577506.2- ctccagaaaactgcagtGATGATGGTATGCTCTTCTCAGGG  
SRR1271656.42884483.2+ cacagaaaactgcagtGATGATGGTATGCTCTTCTCAGGG  
SRR1269723.7787279.2+ acagaaaactgcagtGATGATGGTATGCTCTTCTCAGGG  
SRR1271618.10995740.1- tcagaaaactgcagtGATGATGGTATGCTCTTCTCAGGG  
SRR1271631.17796850.1+ tcagaaaactgcagtGATGATGGTATGCTCTTCTCAGGG  
SRR1265418.1061795.1- cagaaaactgcagtGATGATGGTATGCTCTTCTCAGGG  
SRR1271617.65162719.1+ cagaaaactgcagtGATGATGGTATGCTCTTCTCAGGG  
SRR1271631.73182052.1+ cagaaaactgcagtGATGATGGTATGCTCTTCTCAGGG  
SRR1265959.5289237.2+ agaaaactgcagtGATGATGGTATGCTCTTCTCAGGG  
SRR1269691.1086423.1+ agaaaactgcagtGATGATGGTATGCTCTTCTCAGGG  
SRR1271661.3541586.2+ agaaaactgcagtGATGATGGTATGCTCTTCTCAGGG  
SRR1265429.662140.1- gaaaactgcagtGATGATGGTATGCTCTTCTCAGGG  
SRR1271622.14489347.2+ gaaaactgcagtGATGATGGTATGCTCTTCTCAGGG  
SRR1265101.6853887.1- aaactgcagtGATGATGGTATGCTCTTCTCAGGG  
SRR1266954.10031696.1- aaactgcagtGATGATGGTATGCTCTTCTCAGGG  
SRR1271611.54109106.1- aaactgcagtGATGATGGTATGCTCTTCTCAGGG  
SRR1271627.817121.1- aaactgcagtGATGATGGTATGCTCTTCTCAGGG  
SRR1271631.12525033.2+ aaactgcagtGATGATGGTATGCTCTTCTCAGGG  
SRR1271638.7137901.1+ aaactgcagtGATGATGGTATGCTCTTCTCAGGG  
SRR1271665.15301974.1- aaactgcagtGATGATGGTATGCTCTTCTCAGGG  
SRR1271611.3494094.2- aactgcagtGATGATGGTATGCTCTTCTCAGGG  
SRR1271629.12769352.1- actgcagtGATGATGGTATGCTCTTCTCAGGG  
SRR1271640.2387601.1- actgcagtGATGATGGTATGCTCTTCTCAGGG  
SRR1265961.2477855.1+ ctgcagtGATGATGGTATGCTCTTCTCAGGG  
SRR1265962.4168719.2- ctgcagtGATGATGGTATGCTCTTCTCAGGG  
SRR1266947.19802521.2+ ctgcagtGATGATGGTATGCTCTTCTCAGGG

SRR1266966.437734.2+  
SRR1271620.2068946.1-  
SRR1271631.70375615.1-  
SRR1265105.2962579.1-  
SRR1266961.9230787.2-  
SRR1271642.4563788.2-  
SRR1265102.11716845.1+  
SRR1265424.11995558.2+  
SRR1266956.13063849.1+  
SRR1266962.4122587.1+  
SRR1271609.4569674.1-  
SRR1271627.6371503.1-  
SRR1271631.66929254.2-  
SRR1271639.961470.1-  
SRR1265486.10320482.1-  
SRR1266958.1653120.2-  
SRR1265107.8255291.2-  
SRR1271631.13703327.2+  
SRR1265094.4259059.2+  
SRR1265419.2098789.1+  
SRR1266948.8806088.2+  
SRR1265487.11821367.2+  
SRR1269690.6866648.2+  
SRR1269701.5896733.1+  
SRR1271605.649185.1+  
SRR1271611.30562393.2+  
SRR1265423.6251649.1-  
SRR1266962.11554845.2+  
SRR1269696.1594481.2+  
SRR1271643.6174127.1+  
SRR1271610.5829611.1+  
SRR1271624.3306484.1+  
SRR1265106.6015462.2+  
SRR1265108.2515604.1+  
SRR1265424.15339550.2-  
SRR1271611.16853764.2+  
SRR1271622.14382387.1+  
SRR1271626.3653174.1-  
SRR1271639.12989136.2+  
SRR1271626.19282964.2+  
SRR1265090.6845871.1+  
SRR1266962.7593491.1+  
SRR1271614.6562104.2-  
SRR1271666.15761999.1-  
SRR1265422.11840911.2+  
SRR1265423.4185373.1-  
SRR1265494.4458321.1-  
SRR1271625.17771509.2+  
SRR1271665.16602572.1+  
SRR1269726.363820.1+  
SRR1271616.2011111.2+  
SRR1271626.27417879.2+  
SRR1271630.3176113.1+  
SRR1271664.2748803.2-  
SRR1265423.845833.1+  
SRR1265425.678706.1+  
SRR1265960.14555341.2+  
SRR1266948.14467911.1+  
SRR1269695.4570879.2-  
SRR1271631.92663139.1+  
SRR1266946.18245078.1-  
SRR1271620.711931.1-  
SRR1265424.9055674.2-  
SRR1269690.5523621.2-  
SRR1271611.24840466.2-  
SRR1271637.6571114.2-  
SRR1265102.5685651.2+  
SRR1265485.1858508.1-  
SRR1266952.14069486.2+  
SRR1271627.4158392.1-  
SRR1271661.6840898.1-  
SRR1271666.12193922.1-  
SRR1265420.9704864.2+  
SRR1265960.4362410.1+  
SRR1266950.19035200.2+  
SRR1269721.13769927.2-  
SRR1271617.21164005.1+  
SRR1271631.15064325.1-  
SRR1271661.9678304.1+  
SRR1265485.16069283.1-  
SRR1265493.882472.2+  
SRR1265960.20313739.2-  
SRR1271626.35055944.1-  
SRR1271629.8867623.1-

ctgcagtGATGATGGTATGCTCTTCTCAGGG  
ctgcagtGATGATGGTATGCTCTTCTCAGGG  
ctgcagtGATGATGGTATGCTCTTCTCAGGG  
tgcagtGATGATGGTATGCTCTTCTCAGGG  
tgcagtGATGATGGTATGCTCTTCTCAGGG  
tgcagtGATGATGGTATGCTCTTCTCAGGG  
gcagtGATGATGGTATGCTCTTCTCAGGG  
gcaggGATGATGGTATGCTCTTCTCAGGG  
gcagtGATGATGGTATGCTCTTCTCAGGG  
gcagtGATGATGGTATGCTCTTCTCAGGG  
gcagtGATGATGGTATGCTCTTCTCAGGG  
gcagtGATGATGGTATGCTCTTCTCAGGG  
gcagtGATGATGGTATGCTCTTCTCAGGG  
gcagtGATGATGGTATGCTCTTCTCAGGG  
cagtGATGATGGTATGCTCTTCTCAGGG  
cagtGATGATGGTATGCTCTTCTCAGGG  
gtGATGATGGTATGCTCTTCTCAGGG  
gtGATGATGGTATGCTCTTCTCAGGG  
tgATGATGGTATGCTCTTCTCAGGG  
tgATGATGGTATGCTCTTCTCAGGG  
tgATGATGGTATGCTCTTCTCAGGG  
gATGATGGTATGCTCTTCTCAGGG  
gATGATGGTATGCTCTTCTCAGGG  
gATGATGGTATGCTCTTCTCAGGG  
gATGATGGTATGCTCTTCTCAGGG  
gATGATGGTATGCTCTTCTCAGGG  
ATGATGGTATGCTCTTCTCAGGG  
ATGATGGTATGCTCTTCTCAGGG  
ATGATGGTATGCTCTTCTCAGGG  
ATGATGGTATGCTCTTCTCAGGG  
TGATGGTATGCTCTTCTCAGGG  
TGATGGTATGCTCTTCTCAGGG  
GATGGTATGCTCTTCTCAGGG  
GATGGTATGCTCTTCTCAGGG  
GATGGTATGCTCTTCTCAGGG  
GATGGTATGCTCTTCTCAGGG  
GATGGTATGCTCTTCTCAGGG  
GATGGTATGCTCTTCTCAGGG  
ATGGTATGCTCTTCTCAGGG  
TGGTATGCTCTTCTCAGGG  
TGGTATGCTCTTCTCAGGG  
TGGTATGCTCTTCTCAGGG  
TGGTATGCTCTTCTCAGGG  
GGTATGCTCTTCTCAGGG  
GGTATGCTCTTCTCAGGG  
GGTATGCTCTTCTCAGGG  
GGTATGCTCTTCTCAGGG  
GTGATGCTCTTCTCAGGG  
TGATGCTCTTCTCAGGG  
TGATGCTCTTCTCAGGG  
TGATGCTCTTCTCAGGG  
TGATGCTCTTCTCAGGG  
GATGCTCTTCTCAGGG  
GATGCTCTTCTCAGGG  
GATGCTCTTCTCAGGG  
GATGCTCTTCTCAGGG  
GATGCTCTTCTCAGGG  
ATGCTCTTCTCAGGG  
ATGCTCTTCTCAGGG  
TGCTCTTCTCAGGG  
TGCTCTTCTCAGGG  
TGCTCTTCTCAGGG  
TGCTCTTCTCAGGG  
GCTCTTCTCAGGG  
GCTCTTCTCAGGG  
GCTCTTCTCAGGG  
GCTCTTCTCAGGG  
GCTCTTCTCAGGG  
GCTCTTCTCAGGG  
CTCTTCTCAGGG  
CTCTTCTCAGGG  
CTCTTCTCAGGG  
CTCTTCTCAGGG  
TCTTCTCAGGG  
TCTTCTCAGGG  
TCTTCTCAGGG  
CTTCTCAGGG  
CTTCTCAGGG  
CTTCTCAGGG  
CTTCTCAGGG  
CTTCTCAGGG





SRR1271656.45546724.1- ATCAAGAGAAT  
SRR1265423.8357279.2- ATCAAGAGAATGC  
SRR1265959.10232564.2- CTCAAGAGAATGC  
SRR1271626.1129978.1- ATCAAGAGAATGC  
SRR1271631.78235890.2+ ATCAAGAGAATGC  
SRR1265117.8111828.1+ ATCAAGAGAATGCT  
SRR1265486.4188250.2- ATCAAGAGAATGCT  
SRR1269690.2081589.2+ ATCAAGAGAATGCT  
SRR1269694.9908338.2+ ATCAAGAGAATGCT  
SRR1271631.116517047.2- ATCAAGAGAATGCT  
SRR1271626.15519384.2+ ATCAAGAGAATGCTC  
SRR1271661.7415342.1- ATCAAGAGAATGCTC  
SRR1271619.11721387.2+ ATCAAGAGAATGCTCT  
SRR1271638.16782324.2- ATCAAGAGAATGCTCT  
SRR1271638.4121191.2- ATCAAGAGAATGCTCT  
SRR1266949.3696068.1- ATCAAGAGAATGCTCTT  
SRR1269697.3282854.1- ATCAAGAGAATGCTCTT  
SRR1265429.1518485.1+ ATCAAGAGAATGCTCTTC  
SRR1271621.604681.2- ATCAAGAGAATGCTCTTC  
SRR1271640.3286459.2- ATCAAGAGAATGCTCTTC  
SRR1269693.7819029.1- ATCAAGAGAATGCTCTTCC  
SRR1269724.10149594.2- ATCAAGAGAATGCTCTTCC  
SRR1271637.7917479.2+ ATCAAGAGAATGCTCTTCC  
SRR1271656.32340673.1- ATCAAGAGAATGCTCTTCC  
SRR1265492.2995376.1- ATCAAGAGAATGCTCTTCC  
SRR1269702.9206585.2+ ATCAAGAGAATGCTCTTCC  
SRR1271641.4994077.1- ATCAAGAGAATGCTCTTCC  
SRR1271656.14780067.1- ATCAAGAGAATGCTCTTCC  
SRR1271623.13311270.2- ATCAAGAGAATGCTCTTCC  
SRR1271628.8325711.2- ATCAAGAGAATGCTCTTCC  
SRR1265486.5317212.2- ATCAAGAGAATGCTCTTCC  
SRR1266961.2852570.2- ATCAAGAGAATGCTCTTCC  
SRR1266964.9455231.1- ATCAAGAGAATGCTCTTCC  
SRR1271620.7033507.1- ATCAAGAGAATGCTCTTCC  
SRR1271631.15126426.1- ATCAAGAGAATGCTCTTCC  
SRR1265094.1737834.1- ATCAAGAGAATGCTCTTCC  
SRR1265485.7131594.1- ATCAAGAGAATGCTCTTCC  
SRR1265961.5907868.2- ATCAAGAGAATGCTCTTCC  
SRR1266952.1269097.2- ATCAAGAGAATGCTCTTCC  
SRR1271664.6779123.1+ ATCAAGAGCATGCTCTTCC  
SRR1265116.9489829.1- ATCAAGAGAATGCTCTTCC  
SRR1265962.10464106.1+ ATCAAGAGAATGCTCTTCC  
SRR1271631.51751938.2+ ATCAAGAGAATGCTCTTCC  
SRR1271631.75535824.1+ ATCAAGAGAATGCTCTTCC  
SRR1265427.10252303.2+ ATCAAGAGAATGCTCTTCC  
SRR1271606.2596332.2+ ATCAAGAGAATGCTCTTCC  
SRR1271636.10973309.2+ ATCAAGAGAATGCTCTTCC  
SRR1265108.3192987.1- ATCAAGAGAATGCTCTTCC  
SRR1269694.4040988.2- ATCAAGAGAATGCTCTTCC  
SRR1269721.4648312.1+ ATCAAGAGAATGCTCTTCC  
SRR1271624.17619079.2- ATCAAGAGAATGCTCTTCC  
SRR1271665.12472605.2- ATCAAGAGAATGCTCTTCC  
SRR1265429.13415617.2+ ATCAAGAGAATGCTCTTCC  
SRR1271656.37726636.2+ ATCAAGAGAATGCTCTTCC  
SRR1266947.12676414.2- ATCAAGAGAATGCTCTTCC  
SRR1266965.7238566.2- ATCAAGAGAATGCTCTTCC  
SRR1271630.5638436.1- ATCAAGAGAATGCTCTTCC  
SRR1265091.7293804.2+ ATCAAGAGAATGCTCTTCC  
SRR1265419.9630529.2+ ATCAAGAGAATGCTCTTCC  
SRR1265422.16304480.2+ TTCAAGAGAATGCTCTTCC  
SRR1269691.4350208.1+ ATCAAGAGAATGCTCTTCC  
SRR1269691.4350208.2- ATCAAGAGAATGCTCTTCC  
SRR1269700.5425205.1- ATCAAGAGAATGCTCTTCC  
SRR1271626.23923475.2+ ATCAAGAGAATGCTCTTCC  
SRR1271631.54114509.1- ATCAAGAGAATGCTCTTCC  
SRR1265120.12719577.1+ ATCAAGAGAATGCTCTTCC  
SRR1265490.6979773.2- ATCAAGAGAATGCTCTTCC  
SRR1269689.6208067.2- ATCAAGAGAATGCTCTTCC  
SRR1271656.45740696.2+ ATCAAGAGAATGCTCTTCC  
SRR1271656.51406426.2- ATCAAGAGAATGCTCTTCC  
SRR1269691.2790772.1+ ATCAAGAGAATGCTCTTCC  
SRR1271611.44404236.2- ATCAAGAGAATGCTCTTCC  
SRR1271617.91836522.2- ATCAAGAGAATGCTCTTCC  
SRR1271656.40813652.1+ ATCAAGAGAATGCTCTTCC  
SRR1271661.7471914.1+ ATCAAGAGAATGCTCTTCC  
SRR1265419.5834061.1+ ATCAAGAGAATGCTCTTCC  
SRR1269699.10407563.2- ATCAAGAGAATGCTCTTCC  
SRR1271617.9057728.1+ ATCAAGAGAATGCTCTTCC  
SRR1271630.6944205.2+ AGCAAGAGAATGCTCTTCC  
SRR1271665.4483121.1- ATCAAGAGAATGCTCTTCC  
SRR1265420.9671347.2- ATCAAGAGAATGCTCTTCC  
SRR1265427.143510.1- ATCAAGAGAATGCTCTTCC  
SRR1265492.1503780.2- ATCAAGAGAATGCTCTTCC  
SRR1271618.2332801.2- ATCAAGAGAATGCTCTTCC

SRR1265421.22002067.1+ ATCAAGAGAATGCTCTTCCCTCTTGTTCCTCCCAT  
SRR1266959.12079654.1- ATCAAGAGAATGCTCTTCCCTCTTGTTCCTCCCAT  
SRR1271617.61779939.1- ATCAAGAGAATGCTCTTCCCTCTTGTTCCTCCCAT  
SRR1271631.96785903.1- ATCAAGAGAATGCTCTTCCCTCTTGTTCCTCCCAT  
SRR1271641.8508693.1- ATCAAGAGAATGCTCTTCCCTCTTGTTCCTCCCAT  
SRR1265092.8008049.2- ATCAAGAGAATGCTCTTCCCTCTTGTTCCTCCCATG  
SRR1265107.5946926.1+ ATCAAGAGAATGCTCTTCCCTCTTGTTCCTCCCATG  
SRR1266949.9294787.1+ ATCAAGAGAATGCTCTTCCCTCTTGTTCCTCCCATG  
SRR1266952.18524365.1- ATCAAGAGAATGCTCTTCCCTCTTGTTCCTCCCATG  
SRR1269725.4281425.1+ ATCAAGAGAATGCTCTTCCCTCTTGTTCCTCCCATG  
SRR1271611.8284106.1+ ATCAAGAGAATGCTCTTCCCTCTTGTTCCTCCCATG  
SRR1271626.39792399.1- ATCAAGAGAATGCTCTTCCCTCTTGTTCCTCCCATG  
SRR1271631.53104753.1+ ATCAAGAGAATGCTCTTCCCTCTTGTTCCTCCCATG  
SRR1271631.60482848.2+ ATCAAGAGAATGCTCTTCCCTCTTGTTCCTCCCATG  
SRR1271631.7995179.2+ ATCAAGAGAATGCTCTTCCCTCTTGTTCCTCCCATG  
SRR1265492.6404320.2+ ATCAAGAGAATGCTCTTCCCTCTTGTTCCTCCCATGC  
SRR1266962.3776588.2+ ATCAAGAGAATGCTCTTCCCTCTTGTTCCTCCCATGC  
SRR1266957.1004692.2+ ATCAAGAGAATGCTCTTCCCTCTTGTTCCTCCCATGCT  
SRR1269689.1264618.2- ATCAAGAGAATGCTCTTCCCTCTTGTTCCTCCCATGCT  
SRR1269727.8305397.1+ ATCAAGAGAATGCTCTTCCCTCTTGTTCCTCCCATGCT  
SRR1271641.5711711.1+ ATCAAGAGAATGCTCTTCCCTCTTGTTCCTCCCATGCT  
SRR1271644.6211925.2+ ATCAAGAGAATGCTCTTCCCTCTTGTTCCTCCCATGCT  
SRR1271624.16956133.2- ATCAAGAGAATGCTCTTCCCTCTTGTTCCTCCCATGCTT  
SRR1271636.22676106.2- ATCAAGAGAATGCTCTTCCCTCTTGTTCCTCCCATGCTT  
SRR1265419.9760671.2+ ATCAAGAGAATGCTCTTCCCTCTTGTTCCTCCCATGCTTT  
SRR1265486.16127387.1- ATCAAGAGAATGCTCTTCCCTCTTGTTCCTCCCATGCTTT  
SRR1266957.3246519.1+ ATCAAGAGAATGCTCTTCCCTCTTGTTCCTCCCATGCTTT  
SRR1271616.8117819.1- ATGAAGAGAATGCTCTACCTCTTGTTCCTCCCATGCTTTT  
SRR1271620.7196430.1- ATCAAGAGAATGCTCTTCCCTCTTGTTCCTCCCATGCTTTT  
SRR1271624.5552917.2+ ATCAAGAGAATGCTCTTCCCTCTTGTTCCTCCCATGCTTTT  
SRR1271641.1828285.2+ ATCAAGAGAATGCTCTTCCCTCTTGTTCCTCCCATGCTTTT  
SRR1265421.3532440.1- ATCAAGAGAATGCTCTTCCCTCTTGTTCCTCCCATGCTTTT  
SRR1266951.538073.2+ ATCAAGAGAATGCTCTTCCCTCTTGTTCCTCCCATGATTTTT  
SRR1266961.140544.2- ATCAAGAGAATGCTCTTCCCTCTTGTTCCTCCCATGCTTTTT  
SRR1265959.14596287.2+ ATCAAGAGAATGCTCTTCCCTCTTGTTCCTCCCATGCTTTTTGT  
SRR1266948.20090114.2- ATCAAGAGAATGCTCTTCCCTCTTGTTCCTCCCATGCTTTTTGT  
SRR1265429.4871220.2- ATCAAGAGAATGCTCTTCCCTCTTGTTCCTCCCATGCTTTTTGT  
SRR1265430.10056360.2+ ATCAAGAGAATGCTCTTCCCTCTTGTTCCTCCCATGCTTTTTGT  
SRR1271612.777884.2- ATCAAGAGAATGCTCTTCCCTCTTGTTCCTCCCATGCTTTTTGTTC  
SRR1265485.4295901.1+ ATCAAGAGAATGCTCTTCCCTCTTGTTCCTCCCATGCTTTTTGTTC  
SRR1266953.6459693.2- ATCAAGAGAATGCTCTTCCCTCTTGTTCCTCCCATGCTTTTTTTCT  
SRR1266955.9340457.2+ ATCAAGAGAATGCTCTTCCCTCTTGTTCCTCCCATGCTTTTTTTCT  
SRR1266960.7618362.2+ ATCAAGAGAATGCTCTTCCCTCTTGTTCCTCCCATGCTTTTTTTCT  
SRR1266960.863619.1+ ATCAAGAGAATGCTCTTCCCTCTTGTTCCTCCCATGCTTTTTTTCT  
SRR1271611.51705152.2+ ATCAAGAGAATGCTCTTCCCTCTTGTTCCTCCCATGCTTTTTTTCT  
SRR1271620.10933616.1+ ATCAAGAGAATGCTCTTCCCTCTTGTTCCTCCCATGCTTTTTTTCT  
SRR1271626.5381257.2+ ATCAAGAGAATGCTCTTCCCTCTTGTTCCTCCCATGCTTTTTTTCT  
SRR1266961.10240545.2- ATCAAGAGAATGCTCTTCCCTCTTGTTCCTCCCATGCTTTTTTTCTG  
SRR1266962.1283028.2- ATCAAGAGAATGCTCTTCCCTCTTGTTCCTCCCATGCTTTTTTTCTG  
SRR1271656.21063060.2+ ATCAAGAGAATGCTCTTCCCTCTTGTTCCTCCCATGCTTTTTTTCTG  
SRR1265961.21125338.1+ ATCAAGAGAATGCTCTTCCCTCTTGTTCCTCCCATGCTTTTTTTCTG  
SRR1266964.9037991.2- ATCAAGAGAATGCTCTTCCCTCTTGTTCCTCCCATGCTTTTTTTCTG  
SRR1271617.107030387.1- ATCAAGAGAATGCTCTTCCCTCTTGTTCCTCCCATGCTTTTTTTCTG  
SRR1271664.9315059.2+ ATCAAGAGAATGCTCTTCCCTCTTGTTCCTCCCATGCTTTTTTTCTG  
SRR1265108.11035394.1+ ATCAAGAGAATGCTCTTCCCTCTTGTTCCTCCCATGCTTTTTTTCTG  
SRR1265425.8225295.2+ ATCAAGAGAATGCTCTTCCCTCTTGTTCCTCCCATGCTTTTTTTCTG  
SRR1269700.383429.2+ ATCAAGAGAATGCTCTTCCCTCTTGTTCCTCCCATGCTTTTTTTCTG  
SRR1271626.30577518.1- ATCAAGAGAATGCTCTTCCCTCTTGTTCCTCCCATGCTTTTTTTCTG  
SRR1271635.2818304.1- ATCAAGAGAATGCTCTTCCCTCTTGTTCCTCCCATGCTTTTTTTCTG  
SRR1265492.3432458.1+ ATCAAGAGAATGCTCTTCCCTCTTGTTCCTCCCATGCTTTTTTTCTG  
SRR1266954.5286348.2- ATCAAGAGAATGCTCTTCCCTCTTGTTCCTCCCATGCTTTTTTTCTG  
SRR1271631.18001001.2- ATCAAGAGAATGCTCTTCCCTCTTGTTCCTCCCATGCTTTTTTTCTG  
SRR1265421.25226457.2+ ATCAAGAGAATGCTCTTCCCTCTTGTTCCTCCCATGCTTTTTTTCTG  
SRR1266951.9077736.1+ ATCAAGAGAATGCTCTTCCCTCTTGTTCCTCCCATGCTTTTTTTCTG  
SRR1266959.5837465.2+ ATCAAGAGAATGCTCTTCCCTCTTGTTCCTCCCATGCTTTTTTTCTG  
SRR1271617.13985324.1- ATCAAGAGAATGCTCTTCCCTCTTGTTCCTCCCATGCTTTTTTTCTG  
SRR1265960.10540450.1+ ATCAAGAGAATGCTCTTCCCTCTTGTTCCTCCCATGCTTTTTTTCTG  
SRR1269723.820781.2+ ATCAAGAGAATGCTCTTCCCTCTTGTTCCTCCCATGCTTTTTTTCTG  
SRR1271606.5849136.2+ ATCAAGAGAATGCTCTTCCCTCTTGTTCCTCCCATGCTTTTTTTCTG  
SRR1265120.5268240.2+ ATCAAGAGAATGCTCTTCCCTCTTGTTCCTCCCATGCTTTTTTTCTG  
SRR1271605.16567794.1+ ATCAAGAGAATGCTCTTCCCTCTTGTTCCTCCCATGCTTTTTTTCTG  
SRR1266966.13263794.2- ATCAAGAGAATGCTCTTCCCTCTTGTTCCTCCCATGCTTTTTTTCTG  
SRR1269721.8669041.1+ ATCAAGAGAATGCTCTTCCCTCTTGTTCCTCCCATGCTTTTTTTCTG  
SRR1271656.20184311.1+ ATCAAGAGAATGCTCTTCCCTCTTGTTCCTCCCATGCTTTTTTTCTG  
SRR1271656.31545570.2+ ATCAAGAGAATGCTCTTCCCTCTTGTTCCTCCCATGCTTTTTTTCTG  
SRR1271611.40265863.2+ ATCAAGAGAATGCTCTTCCCTCTTGTTCCTCCCATGCTTTTTTTCTG  
SRR1271641.8238182.2+ ATCAAGAGAATGCTCTTCCCTCTTGTTCCTCCCATGCTTTTTTTCTG  
SRR1271665.16214124.1+ ATCAAGAGAATGCTCTTCCCTCTTGTTCCTCCCATGCTTTTTTTCTG  
SRR1271631.53790917.2+ ATCAAGAGAATGCTCTTCCCTCTTGTTCCTCCCATGCTTTTTTTCTG  
SRR1271636.20236431.2+ ATCAAGAGAATGCTCTTCCCTCTTGTTCCTCCCATGCTTTTTTTCTG  
SRR1265424.13096215.1+ ATCAAGAGAATGCTCTTCCCTCTTGTTCCTCCCATGCTTTTTTTCTG  
SRR1269694.10704014.2- ATCAAGAGAATGCTCTTCCCTCTTGTTCCTCCCATGCTTTTTTTCTG  
SRR1271618.4133814.1- ATCAAGAGAATGCTCTTCCCTCTTGTTCCTCCCATGCTTTTTTTCTG  
SRR1271631.61406029.2+ ATCAAGAGAATGCTCTTCCCTCTTGTTCCTCCCATGCTTTTTTTCTG

SRR1271611.1989144.2+ ATCAAGAGAATGCTCTTCCCTCTTGTTCCTCCCATGCTTTTTGTTCTGGCCAGCTTGACAC  
SRR1271626.12852273.2- ATCAAGAGAATGCTCTTCCCTCTTGTTCCTCCCATGCTTTTTTTCTGGCCAGCTTGACAC  
SRR1271626.6889032.2- ATCAAGAGAATGCTCTTCCCTCTTGTTCCTCCCATGCTTTTTGTTCTGGCCAGCTTGACAC  
SRR1271637.7730229.1+ ATCAAGAGAATGCTCTTCCCTCTTGTTCCTCCCATGCTTTTTTTCTGGCCAGCTTGACAC  
SRR1265090.6845871.1+ ATCAAGAGAATGCTCTTCCCTCTTGTTCCTCCCATGCTTTTTTTCTGGCCAGCTTGACAC  
SRR1265093.9367806.1+ ATCAAGAGAATGCTCTTCCCTCTTGTTCCTCCCATGCTTTTTGTTCTGGCCAGCTTGACAC  
SRR1265094.4259059.2+ ATCAAGAGAATGCTCTTCCCTCTTGTTCCTCCCATGCTTTTTTTCTGGCCAGCTTGACAC  
SRR1265100.8844830.1- ATCAAGAGAATGCTCTTCCCTCTTGTTCCTCCCATGCTTTTTTTCTGGCCAGCTTGACAC  
SRR1265101.6853887.1- ATCAAGAGAATGCTCTTCCCTCTTGTTCCTCCCATGCTTTTTTTCTGGCCAGCTTGACAC  
SRR1265102.11716845.1+ ATCAAGAGAATGCTCTTCCCTCTTGTTCCTCCCATGCTTTTTTTCTGGCCAGCTTGACAC  
SRR1265102.5685651.2+ ATCAAGAGAATGCTCTTCCCTCTTGTTCCTCCCATGCTTTTTTTCTGGCCAGCTTGACAC  
SRR1265103.11096904.1+ ATCAAGAGAATGCTCTTCCCTCTTGTTCCTCCCATGCTTTTTTTCTGGCCAGCTTGACAC  
SRR1265105.2962579.1- ATCAAGAGAATGCTCTTCCCTCTTGTTCCTCCCATGCTTTTTGTTCTGGCCAGCTTGACAC  
SRR1265106.6015462.2+ ATCAAGAGAATGCTCTTCCCTCTTGTTCCTCCCATGCTTTTTGTTCTGGCCAGCTTGACAC  
SRR1265106.6372305.2- ATCAAGAGAATGCTCTTCCCTCTTGTTCCTCCCATGCTTTTTGTTCTGGCCAGCTTGACAC  
SRR1265107.8255291.2- ATCAAGAGAATGCTCTTCCCTCTTGTTCCTCCCATGCTTTTTGTTCTGGCCAGCTTGACAC  
SRR1265108.2515604.1+ ATCAAGAGAATGCTCTTCCCTCTTGTTCCTCCCATGCTTTTTGTTCTGGCCAGCTTGACAC  
SRR1265118.9445284.1+ ATCAAGAGAATGCTCTTCCCTCTTGTTCCTCCCATGCTTTTTTTCTGGCCAGCTTGACAC  
SRR1265418.1061795.1- ATCAAGAGAATGCTCTTCCCTCTTGTTCCTCCCATGCTTTTTTTCTGGCCAGCTTGACAC  
SRR1265419.2098789.1+ ATCAAGAGAATGCTCTTCCCTCTTGTTCCTCCCATGCTTTTTTTCTGGCCAGCTTGACAC  
SRR1265420.9704864.2+ ATCAAGAGAATGCTCTTCCCTCTTGTTCCTCCCATGCTTTTTTTCTGGCCAGCTTGACAC  
SRR1265421.11935315.2- ATCAAGAGAATGCTCTTCCCTCTTGTTCCTCCCATGCTTTTTTTCTGGCCAGCTTGACAC  
SRR1265422.11840911.2+ ATCAAGAGAATGCTCTTCCCTCTTGTTCCTCCCATGCTTTTTTTCTGGCCAGCTTGACAC  
SRR1265423.4185373.1- ATCAAGAGAATGCTCTTCCCTCTTGTTCCTCCCATGCTTTTTTTCTGGCCAGCTTGACAC  
SRR1265423.6251649.1- ATCAAGAGAATGCTCTTCCCTCTTGTTCCTCCCATGCTTTTTTTCTGGCCAGCTTGACAC  
SRR1265423.845833.1+ ATCAAGAGAATGCTCTTCCCTCTTGTTCCTCCCATGCTTTTTTTCTGGCCAGCTTGACAC  
SRR1265424.11995558.2+ ATCAAGAGAATGCTCTTCCCTCTTGTTCCTCCCATGCTTTTTTTCTGGCCAGCTTGACAC  
SRR1265424.15339550.2- ATCAAGAGAATGCTCTTCCCTCTTGTTCCTCCCATGCTTTTTTTCTGGCCAGCTTGACAC  
SRR1265424.9055674.2- ATCAAGAGAATGCTCTTCCCTCTTGTTCCTCCCATGCTTTTTTTCTGGCCAGCTTGACAC  
SRR1265425.678706.1+ ATCAAGAGAATGCTCTTCCCTCTTGTTCCTCCCATGCTTTTTTTCTGGCCAGCTTGACAC  
SRR1265429.3960386.1- ATCAAGAGAATGCTCTTCCCTCTTGTTCCTCCCATGCTTTTTTTCTGGCCAGCTTGACAC  
SRR1265429.662140.1- ATCAAGAGAATGCTCTTCCCTCTTGTTCCTCCCATGCTTTTTTTCTGGCCAGCTTGACAC  
SRR1265485.10372300.1+ ATCAAGAGAATGCTCTTCCCTCTTGTTCCTCCCATGCTTTTTTTCTGGCCAGCTTGACAC  
SRR1265485.16069283.1- ATCAAGAGAATGCTCTTCCCTCTTGTTCCTCCCATGCTTTTTTTCTGGCCAGCTTGACAC  
SRR1265485.1858508.1- ATCAAGAGAATGCTCTTCCCTCTTGTTCCTCCCATGCTTTTTTTCTGGCCAGCTTGACAC  
SRR1265485.8142050.2- ATCAAGAGAATGCTCTTCCCTCTTGTTCCTCCCATGCTTTTTTTCTGGCCAGCTTGACAC  
SRR1265486.1000359.1- ATCAAGAGAATGCTCTTCCCTCTTGTTCCTCCCATGCTTTTTTTCTGGCCAGCTTGACAC  
SRR1265486.10320482.1- ATCAAGAGAATGCTCTTCCCTCTTGTTCCTCCCATGCTTTTTTTCTGGCCAGCTTGACAC  
SRR1265487.11821367.2+ ATCAAGAGAATGCTCTTCCCTCTTGTTCCTCCCATGCTTTTTTTCTGGCCAGCTTGACAC  
SRR1265487.14014666.1+ ATCAAGAGAATGCTCTTCCCTCTTGTTCCTCCCATGCTTTTTTTCTGGCCAGCTTGACAC  
SRR1265493.1938206.2- ATCAAGAGAATGCTCTTCCCTCTTGTTCCTCCCATGCTTTTTTTCTGGCCAGCTTGACAC  
SRR1265493.882472.2+ ATCAAGAGAATGCTCTTCCCTCTTGTTCCTCCCATGCTTTTTTTCTGGCCAGCTTGACAC  
SRR1265494.4458321.1- ATCAAGAGAATGCTCTTCCCTCTTGTTCCTCCCATGCTTTTTTTCTGGCCAGCTTGACAC  
SRR1265959.15507634.1- ATCAAGAGAATGCTCTTCCCTCTTGTTCCTCCCATGCTTTTTTTCTGGCCAGCTTGACAC  
SRR1265959.5289237.2+ ATCAAGAGAATGCTCTTCCCTCTTGTTCCTCCCATGCTTTTTTTCTGGCCAGCTTGACAC  
SRR1265960.14555341.2+ ATCAAGAGAATGCTCTTCCCTCTTGTTCCTCCCATGCTTTTTTTCTGGCCAGCTTGACAC  
SRR1265960.20313739.2- ATCAAGAGAATGCTCTTCCCTCTTGTTCCTACCATGCTTATGTTCTGGCCAGCTTGACAC  
SRR1265960.4362410.1+ ATCAAGAGAATGCTCTTCCCTCTTGTTCCTCCCATGCTTTTTTTCTGGCCAGCTTGACAC  
SRR1265961.2477855.1+ ATCAAGAGAATGCTCTTCCCTCTTGTTCCTCCCATGCTTTTTTTCTGGCCAGCTTGACAC  
SRR1265962.4168719.2- ATCAAGAGAATGCTCTTCCCTCTTGTTCCTCCCATGCTTTTTTTCTGGCCAGCTTGACAC  
SRR1266946.18245078.1- ATCAAGAGAATGCTCTTCCCTCTTGTTCCTCCCATGCTTTTTTTCTGGCCAGCTTGACAC  
SRR1266947.14185884.1+ ATCAAGAGAATGCTCTTCCCTCTTGTTCCTCCCATGCTTTTTTTCTGGCCAGCTTGACAC  
SRR1266947.19802521.2+ ATCAAGAGAATGCTCTTCCCTCTTGTTCCTCCCATGCTTTTTTTCTGGCCAGCTTGACAC  
SRR1266948.14467911.1+ ATCAAGAGAATGCTCTTCCCTCTTGTTCCTCCCATGCTTTTTTTCTGGCCAGCTTGACAC  
SRR1266948.8806088.2+ ATCAAGAGAATGCTCTTCCCTCTTGTTCCTCCCATGCTTTTTTTCTGGCCAGCTTGACAC  
SRR1266950.19035200.2+ ATCAAGAGAATGCTCTTCCCTCTTGTTCCTCCCATGCTTTTTTTCTGGCCAGCTTGACAC  
SRR1266951.18466248.1- ATCAAGAGAATGCTCTTCCCTCTTGTTCCTCCCATGCTTTTTTTCTGGCCAGCTTGACAC  
SRR1266952.14069486.2+ ATCAAGAGAATGCTCTTCCCTCTTGTTCCTCCCATGCTTTTTTTCTGGCCAGCTTGACAC  
SRR1266952.5817620.2- ATCAAGAGAATGCTCTTCCCTCTTGTTCCTCCCATGCTTTTTTTCTGGCCAGCTTGACAC  
SRR1266953.271055.1- ATCAAGAGAATGCTCTTCCCTCTTGTTCCTCCCATGCTTTTTTTCTGGCCAGCTTGACAC  
SRR1266954.10031696.1- ATCAAGAGAATGCTCTTCCCTCTTGTTCCTCCCATGCTTTTT- TTCTGGCCAGCTTGACAC  
SRR1266956.13063849.1+ ATCAAGAGAATGCTCTTCCCTCTTGTTCCTCCCATGCTTTTTTTCTGGCCAGCTTGACAC  
SRR1266956.8774588.1- ATCAAGAGAATGCTCTTCCCTCTTGTTCCTCCCATGCTTTTTTTCTGGCCAGCTTGACAC  
SRR1266958.1653120.2- ATCAAGAGAATGCTCTTCCCTCTTGTTCCTCCCATGCTTTTTTTCTGGCCAGCTTGACAC  
SRR1266960.6717190.2- ATCAAGAGAATGCTCTTCCCTCTTGTTCCTCCCATGCTTTTTTTCTGGCCAGCTTGACAC  
SRR1266961.9230787.2- ATCAAGAGAATGCTCTTCCCTCTTGTTCCTCCCATGCTTTTTTTCTGGCCAGCTTGACAC  
SRR1266962.11554845.2+ ATCAAGAGAATGCTCTTCCCTCTTGTTCCTCCCATGCTTTTTTTCTGGCCAGCTTGACAC  
SRR1266962.4122587.1+ ATCAAGAGAATGCTCTTCCCTCTTGTTCCTCCCATGCTTTTTTTCTGGCCAGCTTGACAC  
SRR1266962.7593491.1+ ATCAAGAGAATGCTCTTCCCTCTTGTTCCTCCCATGCTTTTTTTCTGGCCAGCTTGACAC  
SRR1266965.13605504.1- ATCAAGAGAATGCTCTTCCCTCTTGTTCCTCCCATGCTTTTTTTCTGGCCAGCTTGACAC  
SRR1266966.437734.2+ ATCAAGAGAATGCTCTTCCCTCTTGTTCCTCCCATGCTTTTTTTCTGGCCAGCTTGACAC  
SRR1266966.5523621.2- ATCAAGAGAATGCTCTTCCCTCTTGTTCCTCCCATGCTTTTTTTCTGGCCAGCTTGACAC  
SRR1266969.6866648.2+ ATCAAGAGAATGCTCTTCCCTCTTGTTCCTCCCATGCTTTTTTTCTGGCCAGCTTGACAC  
SRR1266991.1086423.1+ ATCAAGAGAATGCTCTTCCCTCTTGTTCCTCCCATGCTTTTTTTCTGGCCAGCTTGACAC  
SRR1266995.4570879.2- ATCAAGAGAATGCTCTTCCCTCTTGTTCCTCCCATGCTTTTTTTCTGGCCAGCTTGACAC  
SRR1266996.1594481.2+ ATCAAGAGAATGCTCTTCCCTCTTGTTCCTCCCATGCTTTTTTTCTGGCCAGCTTGACAC  
SRR1269696.7386843.1- ATCAAGAGAATGCTCTTCCCTCTTGTTCCTCCCATGCTTTTTTTCTGGCCAGCTTGACAC  
SRR1269700.1764719.1+ ATCAAGAGAATGCTCTTCCCTCTTGTTCCTCCCATGCTTTTTTTCTGGCCAGCTTGACAC  
SRR1269701.5896733.1+ ATCAAGAGAATGCTCTTCCCTCTTGTTCCTCCCATGCTTTTTTTCTGGCCAGCTTGACAC  
SRR1269720.6697396.2+ ATCAAGAGAATGCTCTTCCCTCTTGTTCCTCCCATGCTTTTTTTCTGGCCAGCTTGACAC  
SRR1269721.13769927.2- ATCAAGAGAATGCTCTTCCCTCTTGTTCCTCCCAGCTTTTTTTCTGGCCAGCTTGACAC  
SRR1269723.7787279.2+ ATCAAGAGAATGCTCTTCCCTCTTGTTCCTCCCATGCTTTTTTTCTGGCCAGCTTGACAC  
SRR1269726.363820.1+ ATCAAGAGAATGCTCTTCCCTCTTGTTCCTCCCATGCTTTTTTTCTGGCCAGCTTGACAC  
SRR1271605.649185.1+ ATCAAGAGAATGCTCTTCCCTCTTGTTCCTCCCATGCTTTTTTTCTGGCCAGCTTGACAC

SRR1271609.1031300.1+ ATCAAGAGAATGCTCTTCCCTCTTGTTCCTCCCATGCTTTTTTTCTGGCCAGCTTGCACCT  
SRR1271609.4569674.1- ATCAAGAGAATGCTCTTCCCTCTTGTTCCTCCCATGCTTTTTTTCTGGCCAGCTTGCACCT  
SRR1271610.5829611.1+ ATCAAGAGAATGCTCTTCCCTCTTGTTCCTCCCATGCTTTTTGTTCTGGCCAGCTTGCACCT  
SRR1271611.10364010.1+ ATCAAGAGAATGCTCTTCCCTCTTGTTCCTCCCATGCTTTTTGTTCTGGCCAGCTTGCACCT  
SRR1271611.16853764.2+ ATCAAGAGAATGCTCTTCCCTCTTGTTCCTCCCATGCTTTTTGTTCTGGCCAGCTTGCACCT  
SRR1271611.18839548.2- ATCAAGAGAATGCTCTTCCCTCTTGTTCCTCCCATGCTTTTTGTTCTGGCCAGCTTGCACCT  
SRR1271611.24840466.2+ ATCAAGAGAATGCTCTTCCCTCTTGTTCCTCCCATGCTTTTTGTTCTGGCCAGCTTGCACCT  
SRR1271611.30562393.2+ ATCAAGAGAATGCTCTTCCCTCTTGTTCCTCCCATGCTTTTTTTCTGGCCAGCTTGCACCT  
SRR1271611.3494094.2- ATCAAGAGAATGCTCTTCCCTCTTGTTCCTCCCATGCTTTTTGTTCTGGCCAGCTTGCACCT  
SRR1271611.38267951.1- ATCAAGAGAATGCTCTTCCCTCTTGTTCCTCCCATGCTTTTTGTTCTGGCCAGCTTGCACCT  
SRR1271611.5176815.1+ ATCAAGAGAATGCTCTTCCCTCTTGTTCCTCCCATGCTTTTTTTCTGGCCAGCTTGCACCT  
SRR1271611.54109106.1- ATCAAGAGAATGCTCTTCCCTCTTGTTCCTCCCATGCTTTTTTTCTGGCCAGCTTGCACCT  
SRR1271614.6562104.2- ATCAAGAGAATGCTCTTCCCTCTTGTTCCTCCCATGCTTTTTGTTCTGGCCAGCTTGCACCT  
SRR1271616.2011111.2+ ATCAAGAGAATGCTCTTCCCTCTTGTTCCTCCCATGCTTTTTGTTCTGGCCAGCTTGCACCT  
SRR1271617.106361713.2+ ATCAAGAGAATGCTCTTCCCTCTTGTTCCTCCCATGCTTTTTGTTCTGGCCAGCTTGCACCT  
SRR1271617.107171253.2- ATCAAGAGAATGCTCTTCCCTCTTGTTCCTCCCATGCTTTTTGTTCTGGCCAGCTTGCACCT  
SRR1271617.21164005.1+ ATCAAGAGAATGCTCTTCCCTCTTGTTCCTCCCATGCTTTTTGTTCTGGCCAGCTTGCACCT  
SRR1271617.35068629.2+ ATCAAGAGAATGCTCTTCCCTCTTGTTCCTCCCATGCTTTTTGTTCTGGCCAGCTTGCACCT  
SRR1271617.65162719.1+ ATCAAGAGAATGCTCTTCCCTCTTGTTCCTCCCATGCTTTTTGTTCTGGCCAGCTTGCACCT  
SRR1271617.93090910.1+ ATCAAGAGAATGCTCTTCCCTCTTGTTCCTCCCATGCTTTTTGTTCTGGCCAGCTTGCACCT  
SRR1271618.10995740.1- ATCAAGAGAATGCTCTTCCCTCTTGTTCCTCCCATGCTTTTTGTTCTGGCCAGCTTGCACCT  
SRR1271618.11716789.1- ATCAAGAGAATGCTCTTCCCTCTTGTTCCTCCCATGCTTTTTGTTCTGGCCAGCTTGCACCT  
SRR1271620.2068946.1- ATCAAGAGAATGCTCTTCCCTCTTGTTCCTCCCATGCTTTTTGTTCTGGCCAGCTTGCACCT  
SRR1271620.711931.1- ATCAAGAGAATGCTCTTCCCTCTTGTTCCTCCCATGCTTTTTGTTCTGGCCAGCTTGCACCT  
SRR1271621.3138183.1+ ATCAAGAGAATGCTCTTCCCTCTTGTTCCTCCCATGCTTTTTGTTCTGGCCAGCTTGCACCT  
SRR1271622.14382387.1+ ATCAAGAGAATGCTCTTCCCTCTTGTTCCTCCCATGCTTTTTTTCTGGCCAGCTTGCACCT  
SRR1271622.14489347.2+ ATCAAGAGAATGCTCTTCCCTCTTGTTCCTCCCATGCTTTTTGTTCTGGCCAGCTTGCACCT  
SRR1271624.3306484.1+ ATCAAGAGAATGCTCTTCCCTCTTGTTCCTCCCATGCTTTTTTTCTGGCCAGCTTGCACCT  
SRR1271625.17771509.2+ ATCAAGAGAATGCTCTTCCCTCTTGTTCCTCCCATGCTTTTTGTTCTGGCCAGCTTGCACCT  
SRR1271626.19282964.2+ ATCAAGAGAATGCTCTTCCCTCTTGTTCCTCCCATGCTTTTTGTTCTGGCCAGCTTGCACCT  
SRR1271626.27417879.2+ ATCAAGAGAATGCTCTTCCCTCTTGTTCCTCCCATGCTTTTTGTTCTGGCCAGCTTGCACCT  
SRR1271626.35055944.1- ATCAAGAGAATGCTCTTCCCTCTTGTTCCTCCCATGCTTTTTTTCTGGCCAGCTTGCACCT  
SRR1271626.3653174.1- ATCAAGAGAATGCTCTTCCCTCTTGTTCCTCCCATGCTTTTTTTCTGGCCAGCTTGCACCT  
SRR1271627.4158392.1- ATCAAGAGAATGCTCTTCCCTCTTGTTCCTCCCATGCTTTTTTTCTGGCCAGCTTGCACCT  
SRR1271627.6371503.1- ATCAAGAGAATGCTCTTCCCTCTTGTTCCTCCCATGCTTTTTGTTCTGGCCAGCTTGCACCT  
SRR1271627.817121.1- ATCAAGAGAATGCTCTTCCCTCTTGTTCCTCCCATGCTTTTTTTCTGGCCAGCTTGCACCT  
SRR1271629.12769352.1- ATCAAGAGAATGCTCTTCCCTCTTGTTCCTCCCATGCTTTTTTTCTGGCCAGCTTGCACCT  
SRR1271629.8867623.1- ATCAAGAGAATGCTCTTCCCTCTTGTTCCTCCCATGCTTTTTGTTCTGGCCAGCTTGCACCT  
SRR1271630.3176113.1+ ATCAAGAGAATGCTCTTCCCTCTTGTTCCTCCCATGCTTTTTGTTCTGGCCAGCTTGCACCT  
SRR1271631.12525033.2+ ATCAAGAGAATGCTCTTCCCTCTTGTTCCTCCCATGCTTTTTTTCTGGCCAGCTTGCACCT  
SRR1271631.13703327.2+ ATCAAGAGAATGCTCTTCCCTCTTGTTCCTCCCATGCTTTTTGTTCTGGCCAGCTTGCACCT  
SRR1271631.15064325.1- ATCAAGAGAATGCTCTTCCCTCTTGTTCCTCCCATGCTTTTTTTCTGGCCAGCTTGCACCT  
SRR1271631.17796850.1+ ATCAAGAGAATGCTCTTCCCTCTTGTTCCTCCCATGCTTTTTGTTCTGGCCAGCTTGCACCT  
SRR1271631.56849156.1+ ATCAAGAGAATGCTCTTCCCTCTTGTTCCTCCCATGCTTTTTGTTCTGGCCAGCTTGCACCT  
SRR1271631.66929254.2- ATCAAGAGAATGCTCTTCCCTCTTGTTCCTCCCATGCTTTTTGTTCTGGCCAGCTTGCACCT  
SRR1271631.70375615.1- ATCAAGAGAATGCTCTTCCCTCTTGTTCCTCCCATGCTTTTTTTCTGGCCAGCTTGCACCT  
SRR1271631.73182052.1+ ATCAAGAGAATGCTCTTCCCTCTTGTTCCTCCCATGCTTTTTGTTCTGGCCAGCTTGCACCT  
SRR1271631.92663139.1+ ATCAAGAGAATGCTCTTCCCTCTTGTTCCTCCCATGCTTTTTTTCTGGCCAGCTTGCACCT  
SRR1271635.1018397.2+ ATCAAGAGAATGCTCTTCCCTCTTGTTCCTCCCATGCTTTTTGTTCTGGCCAGCTTGCACCT  
SRR1271635.4911972.1- ATCAAGAGAATGCTCTTCCCTCTTGTTCCTCCCATGCTTTTTGTTCTGGCCAGCTTGCACCT  
SRR1271637.6571114.2- ATCAAGAGAATGCTCTTCCCTCTTGTTCCTCCCATGCTTTTTTTCTGGCCAGCTTGCACCT  
SRR1271638.7137901.1+ ATCAAGAGAATGCTCTTCCCTCTTGTTCCTCCCATGCTTTTTTTCTGGCCAGCTTGCACCT  
SRR1271639.12989136.2+ ATCAAGAGAATGCTCTTCCCTCTTGTTCCTCCCATGCTTTTTGTTCTGGCCAGCTTGCACCT  
SRR1271639.5769975.1- ATCAAGAGAATGCTCTTCCCTCTTGTTCCTCCCATGCTTTTTTTCTGGCCAGCTTGCACCT  
SRR1271639.961470.1- ATCAAGAGAATGCTCTTCCCTCTTGTTCCTCCCATGCTTTTTTTCTGGCCAGCTTGCACCT  
SRR1271640.2387601.1- ATCAAGAGAATGCTCTTCCCTCTTGTTCCTCCCATGCTTTTTTTCTGGCCAGCTTGCACCT  
SRR1271642.1942769.2- ATCAAGATAATGCTCTTCCCTCTTGTTCCTCCCATGCTATTTTGTCTGGCCAGCTTGCACCT  
SRR1271642.3577506.2- ATCAAGAGAATGCTCTTCCCTCTTGTTCCTCCCATGCTTTTTTTCTGGCCAGCTTGCACCT  
SRR1271642.4563788.2- ATCAAGAGAATGCTCTTCCCTCTTGTTCCTCCCATGCTTTTTTTCTGGCCAGATTTGCACCT  
SRR1271643.6174127.1+ ATCAAGAGAATGCTCTTCCCTCTTGTTCCTCCCATGCTTTTTTTCTGGCCAGCTTGCACCT  
SRR1271656.16911801.1- ATCAAGAGAATGCTCTTCCCTCTTGTTCCTCCCATGCTTTTTTTCTGGCCAGCTTGCACCT  
SRR1271656.28111822.2+ ATCAAGAGAATGCTCTTCCCTCTTGTTCCTCCCATGCTTTTTTTCTGGCCAGCTTGCACCT  
SRR1271656.40523025.1- ATCAAGAGAATGCTCTTCCCTCTTGTTCCTCCCATGCTTTTTTTCTGGCCAGCTTGCACCT  
SRR1271656.42884483.2+ ATCAAGAGAATGCTCTTCCCTCTTGTTCCTCCCATGCTTTTTTTCTGGCCAGCTTGCACCT  
SRR1271656.48186978.2- ATCAAGAGAATGCTCTTCCCTCTTGTTCCTCCCATGCTTTTTTTCTGGCCAGCTTGCACCT  
SRR1271661.3541586.2+ ATCAAGAGAATGCTCTTCCCTCTTGTTCCTCCCATGCTTTTTGTTCTGGCCAGCTTGCACCT  
SRR1271661.6840898.1- ATCAAGAGAATGCTCTTCCCTCTTGTTCCTCCCATGCTTTTTGTTCTGGCCAGCTTGCACCT  
SRR1271661.9678304.1+ ATCAAGAGAATGCTCTTCCCTCTTGTTCCTCCCATGCTTTTTGTTCTGGCCAGCTTGCACCT  
SRR1271663.7532180.2- ATCAAGAGAATGCTCTTCCCTCTTTTTCTCCCATGCTTTTTGTTCTGGCCAGCTTGCACCT  
SRR1271664.2748803.2- ATCAAGAGAATGCTCTTCCCTCTTGTTCCTCCCATGCTTTTTTTCTGGCCAGCTTGCACCT  
SRR1271665.15301974.1- ATCAAGAGAATGCTCTTCCCTCTTGTTCCTCCCATGCTTTTTGTTCTGGCCAGCTTGCACCT  
SRR1271665.16602572.1+ ATCAAGAGAATGCTCTTCCCTCTTGTTCCTCCCATGCTTTTTTTCTGGCCAGCTTGCACCT  
SRR1271666.12193922.1- ATCAAGAGAATGCTCTTCCCTCTTGTTCCTCCCATGCTTTTTTTCTGGCCAGCTTGCACCT  
SRR1271666.15761999.1- ATCAAGAGAATGCTCTTCCCTCTTGTTCCTCCCATGCTTTTTGTTCTGGCCAGCTTGCACCT  
SRR1269723.11892874.1+ TCAAGAGAATGCTCTTCCCTCTTGTTCCTCCCATGCTTTTTTTCTGGCCAGCTTGCACCT  
SRR1265421.10156975.1- CAAGAGAATGCTCTTCCCTCTTGTTCCTCCCATGCTTTTTTTCTGGCCAGCTTGCACCT  
SRR1265961.17342409.2+ CAAGAGAATGCTCTTCCCTCTTGTTCCTCCCATGCTTTTTGTTCTGGCCAGCTTGCACCT  
SRR1269722.612784.1+ CAAGAGAATGCTCTTCCCTCTTGTTCCTCCCATGCTTTTTTTCTGGCCAGCTTGCACCT  
SRR1271616.12361.2+ CAAGAGAATGCTCTTCCCTCTTGTTCCTCCCATGCTTTTTGTTCTGGCCAGCTTGCACCT  
SRR1271631.2131030.2+ CAAGAGAATGCTCTTCCCTCTTGTTCCTCCCATGCTTTTTTTCTGGCCAGCTTGCACCT  
SRR1271637.2457105.1- CAAGAGAATGCTCTTCCCTCTTGTTCCTCCCATGCTTTTTGTTCTGGCCAGCTTGCACCT  
SRR1266960.8454366.2+ AAGAGAATGCTCTTCCCTCTTGTTCCTCCCATGCTTTTTTTCTGGCCAGCTTGCACCT  
SRR1269691.6982732.2+ AAGAGAATGCTCTTCCCTCTTGTTCCTCCCATGCTTTTTTTCTGGCCAGCTTGCACCT  
SRR1269703.1669213.2+ AAGAGAATGCTCTTCCCTCTTGTTCCTCCCATGCTTTTTTTCTGGCCAGCTTGCACCT



SRR1271625.13588244.2+  
SRR1265959.16757127.1-  
SRR1269724.4208407.1+  
SRR1265485.8802153.2-  
SRR1269690.1324197.2-  
SRR1266955.7154550.1+  
SRR1271611.5929085.1+  
SRR1271617.46820496.1+  
SRR1265107.2088771.2-  
SRR1266966.1422141.1+  
SRR1271626.29048032.1+  
SRR1271612.6213795.1+  
SRR1271636.5617421.2+  
SRR1271662.3330309.1+  
SRR1265103.8617061.1-  
SRR1266957.3666759.1+  
SRR1271617.8325012.1+  
SRR1265107.11198169.1+  
SRR1265959.13791605.2+  
SRR1271619.10258847.1-  
SRR1271624.16629241.2-  
SRR1265424.14499483.2-  
SRR1266957.1389486.2+  
SRR1269721.7475901.1+  
SRR1271626.39375321.1-  
SRR1271643.2019678.1+  
SRR1266957.10574795.2-  
SRR1271642.5331247.1+  
SRR1266965.6865544.1+  
SRR1271611.45328290.1+  
SRR1265107.9116199.1-  
SRR1265421.10976887.1+  
SRR1265421.28186333.1+  
SRR1265487.10026670.1-  
SRR1265487.15510276.2-  
SRR1269689.606782.2+  
SRR1265493.2249139.2-  
SRR1266963.4385495.1+  
SRR1271664.7577323.2+  
SRR1266950.11307404.1-  
SRR1271639.17341141.1+  
SRR1265092.2139034.1-  
SRR1265101.2621422.2-  
SRR1266960.4673203.1-  
SRR1269689.10802270.2+  
SRR1269690.6701197.1+  
SRR1269691.5900866.2+  
SRR1269698.4930714.1-  
SRR1271616.4976712.2+  
SRR1271618.649812.2+  
SRR1265102.11843773.1-  
SRR1265421.28387803.2+  
SRR1265427.12651809.2-  
SRR1265427.6605459.1+  
SRR1271631.56868617.2-  
SRR1266962.4519620.1-  
SRR1271661.2368772.1+  
SRR1265424.4163374.2+  
SRR1266949.1088605.1-  
SRR1269690.8024392.2+  
SRR1271623.12702077.1+  
SRR1271660.66535.1-  
SRR1265107.6644656.1-  
SRR1271631.25901633.1+  
SRR1271644.4072249.1-  
SRR1265430.10892354.1+  
SRR1266962.2111129.1-  
SRR1269695.709605.2-  
SRR1271605.5228759.1+  
SRR1269695.5539655.2+  
SRR1271624.11221728.1-  
SRR1265116.6928798.1+  
SRR1265419.2667566.2-  
SRR1265488.7425864.1-  
SRR1269697.3110262.1+  
SRR1271617.81306830.2+

CCCATGCTTTTTTCTGGCCAGCTTGCACCT  
CCATGCTTTTGTCTGGCCAGCTTGCCCT  
CCATGCTTTTTTCTGGCCAGCTTGCACCT  
CATGCTTTTGTCTGGCCAGCTTGCACCT  
CATGCTTTTTTCTGGCCAGCTTGCACCT  
ATGCTTTTGTCTGGCCAGCTTGCACCT  
ATGCTTTTGTCTGGCCAGCTTGCACCT  
ATGCTTTTGTCTGGCCAGCTTGCACCT  
TGCTTTTGTCTGGCCAGCTTGCACCT  
GCTTTTTTCTGGCCAGCTTGCACCT  
GCTTTTGTCTGGCCAGCTTGCACCT  
CTTTTGTCTGGCCAGCTTGCACCT  
CTTTTGTCTGGCCAGCTTGCACCT  
CTTTTGTCTGGCCAGCTTGCACCT  
TTTTTCTGGCCAGCTTGCACCT  
TTTTTCTGGCCAGCTTGCACCT  
TGTTCTGGCCAGCTTGCACCT  
GTTCTGGCCAGCTTGCACCT  
GTTCTGGCCAGCTTGCACCT  
GTTCTGGCCAGCTTGCACCT  
TTTTCTGGCCAGCTTGCACCT  
TTCTGGCCAGCTTGCACCT  
TTCTGGCCAGCTTGCACCT  
TTCTGGCCAGCTTGCACCT  
TTCTGGCCAGCTTGCACCT  
TTCTGGCCAGCTTGCACCT  
TCTGGCCAGCTTGCTCCT  
TCTGGCCAGCTTGCACCT  
CTGGCCAGCTTGCACCT  
CTGGCCAGCTTGCACCT  
TGGCCAGCTTGCACCT  
GGCCAGCTTGCACCT  
GGCCAGCTTGCACCT  
GGCCAGCTTGCCCT  
GGCCAGCTTGCCCT  
GGCCAGCTTGCACCT  
GCCAGCTTGCACCT  
GCCAGCTTGCACCT  
GCCAGCTTGCACCT  
CAGCTTGCACCT  
CAGCTTGCACCT  
AGCTTGCACCT  
AGCTTGCACCT  
AGCTTGCACCT  
AGCTTGCACCT  
AGCTTGCACCT  
AGCTTGCACCT  
AGCTTGCACCT  
AGCTTGCACCT  
GCTTGCACCT  
GCTTGCACCT  
GCTTGCCCT  
GCTTGCACCT  
GCTTGCACCT  
TTGCACCT  
TTGCACCT  
TGCACCT  
TGCCCT  
TGCACCT  
TGCACCT  
CACCT  
ACCT  
ACCT  
ACCT  
CCT  
CCT  
CCT  
CCT  
CT  
CT  
T  
T  
T  
T  
T

consensus

ATCAAGAGAATGCTCTTCTCTTGTCTCCCATGCTTTTGTCTGGCCAGCTTGCACCT

SRR1269723.7787279.2+ C  
SRR1271618.10995740.1- C  
SRR1271631.17796850.1+ C  
SRR1271617.65162719.1+ CC

|                        |                          |
|------------------------|--------------------------|
| SRR1271631.73182052.1+ | CC                       |
| SRR1271642.4563788.2-  | CC                       |
| SRR1265959.5289237.2+  | CCA                      |
| SRR1269691.1086423.1+  | CCA                      |
| SRR1271661.3541586.2+  | CCA                      |
| SRR1265429.662140.1-   | CCAC                     |
| SRR1271622.14489347.2+ | CCAC                     |
| SRR1265101.6853887.1-  | CCACT                    |
| SRR1266954.10031696.1- | CCACT                    |
| SRR1271611.54109106.1- | CCACT                    |
| SRR1271627.817121.1-   | CCACT                    |
| SRR1271631.12525033.2+ | CCACT                    |
| SRR1271638.7137901.1+  | CCACT                    |
| SRR1271665.15301974.1- | CCACT                    |
| SRR1265485.8142050.2-  | CCACTG                   |
| SRR1271611.3494094.2-  | CCACTG                   |
| SRR1271629.12769352.1- | CCACTGC                  |
| SRR1271640.2387601.1-  | CCACTGC                  |
| SRR1265961.2477855.1+  | CCACTGCT                 |
| SRR1265962.4168719.2-  | CCACTGCT                 |
| SRR1266947.19802521.2+ | CCACTGCT                 |
| SRR1266966.437734.2+   | CCACTGCT                 |
| SRR1271620.2068946.1-  | CCACTGCT                 |
| SRR1271631.70375615.1- | CCACTGCT                 |
| SRR1265105.2962579.1-  | CCACTGCTG                |
| SRR1266961.9230787.2-  | CCACTGCTG                |
| SRR1265102.11716845.1+ | CCACTGCTGC               |
| SRR1265102.5685651.2+  | CCACTGCTGC               |
| SRR1265424.11995558.2+ | CCACTGCTGC               |
| SRR1266956.13063849.1+ | CCACTGCTGC               |
| SRR1266962.4122587.1+  | CCACTGCTGC               |
| SRR1271609.4569674.1-  | CCACTGCTGC               |
| SRR1271627.6371503.1-  | CCACTGCTGC               |
| SRR1271631.66929254.2- | CCACTGCTGC               |
| SRR1271639.961470.1-   | CCACTGCTGC               |
| SRR1265486.10320482.1- | CCACTGCTGCG              |
| SRR1266958.1653120.2-  | CCACTGCTGTG              |
| SRR1271631.13703327.2+ | CCACTGCTGCG              |
| SRR1265107.8255291.2-  | CCACTGCTGTGTT            |
| SRR1271611.30562393.2+ | CCACTGCTGCGTT            |
| SRR1265094.4259059.2+  | CCACTGCTGCGTTT           |
| SRR1265106.6015462.2+  | CCACTGCTGTGTTT           |
| SRR1265419.2098789.1+  | CCACTGCTGTGTTT           |
| SRR1266948.8806088.2+  | CCACTGCTGCGTTT           |
| SRR1265429.12954956.2- | CCACTGCTGCGTTTC          |
| SRR1265487.11821367.2+ | CCACTGCTGCGTTTC          |
| SRR1269690.6866648.2+  | CCACTGCTGCGTTTC          |
| SRR1269701.5896733.1+  | CCACTGCTGCGTTTC          |
| SRR1271605.649185.1+   | CCACTGCTGCGTTTC          |
| SRR1265423.6251649.1-  | CCACTGCTGCGTTTCC         |
| SRR1266946.18245078.1- | CCACTGCTGCGTTTCC         |
| SRR1266962.11554845.2+ | CCACTGCTGCGTTTCC         |
| SRR1269696.1594481.2+  | CCACTGCTGCGTTTCC         |
| SRR1271643.6174127.1+  | CCACTGCTGCGTTTCC         |
| SRR1271610.5829611.1+  | CCACTGCTGCGTTTCCC        |
| SRR1271622.14382387.1+ | CCACTGCTGCGTTTCCC        |
| SRR1271624.3306484.1+  | CCACTGCTGCGTTTCCC        |
| SRR1265108.2515604.1+  | CCACTGCTGCGTTCCCC        |
| SRR1265424.15339550.2- | CCACTGCTGCGTTCCCC        |
| SRR1271611.16853764.2+ | CCACTGCTGCGTTCCCC        |
| SRR1271626.3653174.1-  | CCACTGCTGCGTTCCCC        |
| SRR1271639.12989136.2+ | CCACTGCTGCGTTCCCC        |
| SRR1271614.6562104.2-  | CCACTGCTGCGTTCCCCA       |
| SRR1271626.19282964.2+ | CCACTGCTGCGTTCCCCA       |
| SRR1265090.6845871.1+  | CCACTGCTGCGTTCCCCAC      |
| SRR1266962.7593491.1+  | CCACTGCTGCGTTCCCCAC      |
| SRR1269721.13769927.2- | CCACTGCTGCGTTCCACCAC     |
| SRR1271666.15761999.1- | CCACTGCTGCGTTTCCCCAC     |
| SRR1265422.11840911.2+ | CCACTGCTGCGTTTCCCCACC    |
| SRR1265423.4185373.1-  | CCACTGCTGCGTTTCCCCACC    |
| SRR1265494.4458321.1-  | CCACTGCTGCGTTTCCCCACC    |
| SRR1271625.17771509.2+ | CCACTGCTGCGTTTCCCCACC    |
| SRR1271665.16602572.1+ | CCACTGCTGCGTTTCCCCACC    |
| SRR1269726.363820.1+   | CCACTGCTGCGTTTCCCCACCT   |
| SRR1271616.2011111.2+  | CCACTGCTGCGTTTACCACCTT   |
| SRR1271626.27417879.2+ | CCACTGCTGCGTTTCCCCACCTT  |
| SRR1271630.3176113.1+  | CCACTGCTGCGTTTCCCCACCTT  |
| SRR1271664.2748803.2-  | CCACTGCTGCGTTTCCCCACCTT  |
| SRR1265423.845833.1+   | CCACTGCTGCGTTTCCCCACCTTA |
| SRR1265425.678706.1+   | CCACTGCTGCGTTTCCCCACCTTA |
| SRR1265960.14555341.2+ | CCACTGCTGCGTTTCCCCACCTTA |
| SRR1266948.14467911.1+ | CCACTGCTGCGTTTCCCCACCTTA |
| SRR1269695.4570879.2-  | CCACTGCTGCGTTTCCCCACCTTA |
| SRR1271631.92663139.1+ | CCACTGCTGCGTTTCCCCACCTTA |

SRR1271620.711931.1- CCACTGCTGCGTTTTCCCCACCTTAT  
SRR1271637.6571114.2- CCACTGCTGCGTTTTCCCCACCTTAT  
SRR1265424.9055674.2- CCACTGCTGCGTTTTCCCCACCTTATT  
SRR1269690.5523621.2- CCACTGCTGCGTTTTCCCCACCTTATT  
SRR1271611.24840466.2- CCACTGCTGCGTTTTCCCCACCTTATT  
SRR1265485.1858508.1- CCACTGCTGCGTTTTCCCCACCTTATTG  
SRR1266952.14069486.2+ CCACTGCTGCGTTTTCCCCACCTTATTG  
SRR1271627.4158392.1- CCACTGCTGCGTTTTCCCCACCTTATTG  
SRR1271661.6840898.1- CCACTGCTGCGTTTTCCCCACCTTATTG  
SRR1271666.12193922.1- CCACTGCTGCGTTTTCCCCACCTTATTG  
SRR1265420.9704864.2+ CCACTGCTGCGTTTTCCCCACCTTATTGG  
SRR1265960.4362410.1+ CCACTGCTGCGTTTTCCCCACCTTATTGG  
SRR1266950.19035200.2+ CCACTGCTGCGTTTTCCCCACCTTATTGG  
SRR1271617.21164005.1+ CCACTGCTGCGTTTTCCCCACCTTATTGGA  
SRR1271631.15064325.1- CCACTGCTGCGTTTTCCCCACCTTATTGGA  
SRR1271661.9678304.1+ CCACTGCTGCGTTTTCCCCACCTTATTGGA  
SRR1271663.7532180.2- CCACTGCTGCGTTTTCCCCACCTTATTGGA  
SRR1265485.16069283.1- CCACTGCTGCGTTTTCCCCACCTTATTGGAT  
SRR1265493.882472.2+ CCACTGCTGCGTTTTCCCCACCTTATTGGAT  
SRR1265960.20313739.2- CCACTGCTGCGTTTTCCCCACCTTATTGGAT  
SRR1271626.35055944.1- CCACTGCTGCGTTTTCCCCACCTTATTGGAT  
SRR1271629.8867623.1- CCACTGCTGCGTTTTCCCCACCTTATTGGAT  
SRR1269720.6697396.2+ CCACTGCTGCGTTTTCCCCACCTTATTGGATC  
SRR1271609.1031300.1+ CCACTGCTGCGTTTTCCCCACCTTATTGGATC  
SRR1271611.10364010.1+ CCACTGCTGCGTTTTCCCCACCTTATTGGATC  
SRR1271635.1018397.2+ CCACTGCTGCGTTTTCCCCACCTTATTGGATC  
SRR1266960.6717190.2- CCACTGCTGCGTTTTCCCCACCTTATTGGATCC  
SRR1271631.56849156.1+ CCACTGCTGCGTTTTCCCCACCTTATTGGATCC  
SRR1265103.11096904.1+ CCACTGCTGCGTTTTCCCCACCTTATTGGATCCT  
SRR1265106.6372305.2- CCACTGCTGCGTTTTCCCCACCTTATTGGATCCT  
SRR1266947.14185884.1+ CCACTGCTGCGTTTTCCCCACCTTATTGGATCCT  
SRR1266951.18466248.1- CCACTGCTGCGTTTTCCCCACCTTATTGGATCCT  
SRR1269700.1764719.1+ CCACTGCTGCGTTTTCCCCACCTTATTGGATCCT  
SRR1265421.11935315.2- CCACTGCTGCGTTTTCCCCACCTTATTGGATCCTT  
SRR1265959.15507634.1- CCACTGCTGCGTTTTCCCCACCTTATTGGATCCTT  
SRR1271611.18839548.2- CCACTGCTGCGTTTTCCCCACCTTATTGGATCCTT  
SRR1271611.38267951.1- CCACTGCTGCGTTTTCCCCACCTTATTGGATCCTT  
SRR1271618.11716789.1- CCACTGCTGCGTTTTCCCCACCTTATTGGATCCTT  
SRR1271635.4911972.1- CCACTGCTGCGTTTTCCCCACCTTATTGGATCCTT  
SRR1271642.1942769.2- CCACTGCTGCGTTTTCCCCACCTTATTGGATCCTT  
SRR1265485.10372300.1+ CCACTGCTGCGTTTTCCCCACCTTATTGGATCCTTC  
SRR1265486.1000359.1- CCACTGCTGCGTTTTCCCCACCTTATTGGATCCTTC  
SRR1265487.14014666.1+ CCACTGCTGCGTTTTCCCCACCTTATTGGATCCTTC  
SRR1271611.5176815.1+ CCACTGCTGCGTTTTCCCCACCTTATTGGATCCTTC  
SRR1271656.28111822.2+ CCACTGCTGCGTTTTCCCCACCTTATTGGATCCTTC  
SRR1271656.48186978.2- CCACTGCTGCGTTTTCCCCACCTTATTGGATCCTTC  
SRR1265493.1938206.2- CCACTGCTGCGTTTTCCCCACCTTATTGGATCCTTCC  
SRR1271617.107171253.2- CCACTGCTGCGTTTTCCCCACCTTATTGGATCCTTCC  
SRR1265093.9367806.1+ CCACTGCTGCGTTTTCCCCACCTTATTGGATCCTTCCA  
SRR1265429.3960386.1- CCACTGCTGCGTTTTCCCCACCTTATTGGATCCTTCCA  
SRR1271656.40523025.1- CCACTGCTGCGTTTTCCCCACCTTATTGGATCCTTCCA  
SRR1266952.5817620.2- CCACTGCTGCGTTTTCCCCACCTTATTGGATCCTTCCAG  
SRR1266956.8774588.1- CCACTGCTGCGTTTTCCCCACCTTATTGGATCCTTCCAG  
SRR1266965.13605504.1- CCACTGCTGCGTTTTCCCCACCTTATTGGATCCTTCCAG  
SRR1269696.7386843.1- CCACTGCTGCGTTTTCCCCACCTTATTGGATCCTTCCAG  
SRR1271656.16911801.1- CCACTGCTGCGTTTTCCCCACCTTATTGGATCCTTCCAG  
SRR1265100.8844830.1- CCACTGCTGCGTTTTCCCCACCTTATTGGATCCTTCCAGC  
SRR1271617.106361713.2+ CCACTGCTGCGTTTTCCCCACCTTATTGGATCCTTCCAGC  
SRR1271617.35068629.2+ CCACTGCTGCGTTTTCCCCACCTTATTGGATCCTTCCAGC  
SRR1271617.93090910.1+ CCACTGCTGCGTTTTCCCCACCTTATTGGATCCTTCCAGC  
SRR1265118.9445284.1+ CCACTGCTGCGTTTTCCCCACCTTATTGGATCCTTCCAGCA  
SRR1271621.3138183.1+ CCACTGCTGCGTTTTCCCCACCTTATTGGATCCTTCCAGCA  
SRR1271639.5769975.1- CCACTGCTGCGTTTTCCCCACCTTATTGGATCCTTCCAGCA  
SRR1269723.11892874.1+ CCACTGCTGCGTTTTCCCCACCTTATTGGATCCTTCCAGCAT  
SRR1265421.10156975.1- CCACTGCTGCGTTTTCCCCACCTTATTGGATCCTTCCAGCATG  
SRR1265961.17342409.2+ CCACTGCTGCGTTTTCCCCACCTTATTGGATCCTTCCAGCATG  
SRR1269722.612784.1+ CCACTGCTGCGTTTTCCCCACCTTATTGGATCCTTCCAGCATG  
SRR1271616.12361.2+ CCACTGCTGCGTTTTCCCCACCTTATTGGATCCTTCCAGCATG  
SRR1271631.2131030.2+ CCACTGCTGCGTTTTCCCCACCTTATTGGATCCTTCCAGCATG  
SRR1271637.2457105.1- CCACTGCTGCGTTTTCCCCACCTTATTGGATCCTTCCAGCATG  
SRR1266960.8454366.2+ CCACTGCTGCGTTTTCCCCACCTTATTGGATCCTTCCAGCATGT  
SRR1269691.6982732.2+ CCACTGCTGCGTTTTCCCCACCTTATTGGATCCTTCCAGCATGT  
SRR1269703.1669213.2+ CCACTGCTGCGTTTTCCCCACCTTATTGGATCCTTCCAGCATGT  
SRR1265103.11542175.1+ CCACTGCTGCGTTTTCCCCACCTTATTGGATCCTTCCAGCATGTT  
SRR1269721.3127720.1- CCACTGCTGCGTTTTCCCCACCTTATTGGATCCTTCCAGCATGTT  
SRR1271612.6153622.1+ CCACTGCTGCGTTTTCCCCACCTTATTGGATCCTTCCAGCATGTT  
SRR1271617.49734526.1+ CCACTGCTGCGTTTTCCCCACCTTATTGGATCCTTCCAGCATGTT  
SRR1271624.1867358.2+ CCACTGCTGCGTTTTCCCCACCTTATTGGATCCTTCCAGCATGTT  
SRR1266947.868250.2+ CCACTGCTGCGTTTTCCCCACCTTATTGGATCCTTCCAGCATGTTT  
SRR1271636.20102713.1- CCACTGCTGCGTTTTCCCCACCTTATTGGATCCTTCCAGCATGTTT  
SRR1265116.2223311.1- CCACTGCTGCGTTTTCCCCACCTTATTGGATCCTTCCAGCATGTTT  
SRR1265420.9541940.2+ CCACTGCTGCGTTTTCCCCACCTTATTGGATCCTTCCAGCATGTTT  
SRR1265423.5540826.1+ CCACTGCTGCGTTTTCCCCACCTTATTGGATCCTTCCAGCATGTTT  
SRR1265486.10961790.2- CCACTGCTGCGTTTTCCCCACCTTATTGGATCCTTCCAGCATGTTT



SRR1266954.13274081.2+ CCACTGCTGCGTTTTCCCCACCTTATTGGATCCTTCCAGCATGTTCT  
SRR1271626.5495113.1+ CCACTGCTGCGTTTTCCCCACCTTATTGGATCCTTCCAGCATGTTCT  
SRR1271629.12293870.2- CCACTGCTGCGTTTTCCCCACCTTATTGGATCCTTCCAGCATGTTCT  
SRR1271644.2407654.1- CCACTGCTGCGTTTTCCCCACCTTATTGGATCCTTCCAGCATGTTCT  
SRR1271664.496248.1+ CCACTGCTGCGTTTTCCCCACCTTATTGGATCCTTCCAGCATGTTCTA  
SRR1265492.11023875.2+ CCACTGCTGCGTTTTCCCCACCTTATTGGATCCTTCCAGCATGTTCTAC  
SRR1266948.7331073.2- CCACTGCTGCGTTTTCCCCACCTTATTGGATCCTTCCAGCATTTTTCTAC  
SRR1271605.19857960.1- CCACTGCTGCGTTTTCCCCACCTTATTGGATCCTTCCAGCATGTTCTAC  
SRR1271611.49730989.1+ CCACTGCTGCGTTTTCCCCACCTTATTGGATCCTTCCAGCATGTTCTAC  
SRR1271620.8170287.2+ CCACTGCTGCGTTTTCCCCACCTTATTGGATCCTTCCAGCATGTTCTAC  
SRR1271626.25836168.2- CCACTGCTGCGTTTTCCCCACCTTATTGGATCCTTCCAGCATGTTCTAC  
SRR1271617.31861062.2+ CCACTGCTGCGTTTTCCCCACCTTATTGGATCCTTCCAGCATGTTCTACC  
SRR1271631.13391857.2+ CCACTGCTGCGTTTTCCCCACCTTATTGGATCCTTCCAGCATGTTCTACC  
SRR1266959.358352.2- CCACTGCTGCGTTTTCCCCCCTTATTGGATCCTTCCAGCATGTTCTCCCT  
SRR1269694.9029316.2- CCACTGCTGCGTTTTCCCCACCTTATTGGATCCTTCCAGCATGTTCTACCT  
SRR1271639.4180019.1+ CCACTGCTGCGTTTTCCCCACCTTATTGGATCCTTCCAGCATGTTCTACCT  
SRR1271630.6754689.2+ CCACTGCTGCGTTTTCCCCACCTTATTGGATCCTTCCAGCATGTTCTACCTC  
SRR1265103.11542175.2- CCACTGCTGCGTTTTCCCCACCTTATTGGATCCTTCCAGCATGTTCTACCTCC  
SRR1266950.10231735.2+ CCACTGCTGCGTTTTCCCCACCTTATTGGATCCTTCCAGCATGTTCTCCCTCC  
SRR1271618.11957621.2+ CCACTGCTGCGTTTTCCCCACCTTATTGGATCCTTCCAGCATGTTCTACCTCC  
SRR1265419.2274158.2+ CCACTGCTGCGTTTTCCCCACCTTATTGGATCCTTCCAGCATGTTCTACCTCCA  
SRR1269696.95546.1- CCACTGCTGCGTTTTCCCCACCTTATTGGATCCTTCCAGCATGTTCTACCTCCA  
SRR1269698.2485360.2- CCACTGCTGCGTTTTCCCCACCTTATTGGATCCTTCCAGCATGTTCTACCTCCA  
SRR1269723.12292891.1+ CCACTGCTGCGTTTTCCCCACCTTATTGGATCCTTCCAGCATGTTCTACCTCCA  
SRR1271623.14004856.2+ CCACTGCTGCGTTTTCCCCACCTTATTGGATCCTTCCAGCATGTTCTACCTCCA  
SRR1265419.9204382.2- CCACTGCTGCGTTTTCCCCACCTTATTGGATCCTTCCAGCATGTTCTACCTCCA  
SRR1265488.2451011.1- CCACTGCTGCGTTTTCCCCACCTTATTGGATCCTTCCAGCATGTTCTACCTCCA  
SRR1265962.6556046.2- CCACTGCTGCGTTTTCCCCACCTTATTGGATCCTTCCAGCATGTTCTACCTCCA  
SRR1271610.18281570.1+ CCACTGCTGCGTTTTCCCCACCTTATTGGATCCTTCCAGCATGTTCTACCTCCA  
SRR1265100.6999977.1- CCACTGCTGCGTTTTCCCCACCTTATTGGATCCTTCCAGCATGTTCTACCTCCA  
SRR1271612.6407329.2+ CCACTGCTGCGTTTTCCCCACCTTATTGGATCCTTCCAGCATGTTCTACCTCCA  
SRR1271660.19233729.1+ CCACTGCTGCGTTTTCCCCACCTTATTGGATCCTTCCAGCATGTTCTACCTCCA  
SRR1265091.8211546.1+ CCACTGCTGCGTTTTCCCCACCTTATTGGATCCTTCCAGCATGTTCTACCTCCA  
SRR1265102.1899426.1+ CCACTGCTGCGTTTTCCCCACCTTATTGGATCCTTCCAGCATGTTCTACCTCCA  
SRR1266948.400501.2+ CCACTGCTGCGTTTTCCCCACCTTATTGGATCCTTCCAGCATGTTCTACCTCCA  
SRR1269700.2113418.1+ CCACTGCTGCGTTTTCCCCACCTTATTGGATCCTTCCAGCATGTTCTACCTCCA  
SRR1271621.4075809.1- CCACTGCTGCGTTTTCCCCACCTTATTGGATCCTTCCAGCATGTTCTACCTCCA  
SRR1271628.228721.1+ CCACTGCTGCGTTTTCCCCACCTTATTGGATCCTTCCAGCATGTTCTACCTCCA  
SRR1271631.42457297.2- CCACTGCTGCGTTTTCCCCACCTTATTGGATCCTTCCAGCATGTTCTACCTCCA  
SRR1271631.89798142.2+ CCACTGCTGCGTTTTCCCCACCTTATTGGATCCTTCCAGCATGTTCTACCTCCA  
SRR1271640.8629898.2+ CCACTGCTGCGTTTTCCCCACCTTATTGGATCCTTCCAGCATGTTCTACCTCCA  
SRR1265421.26923308.1+ CCACTGCTGCGTTTTCCCCACCTTATTGGATCCTTCCAGCATGTTCTACCTCCA  
SRR1269694.1056175.1+ CCACTGCTGCGTTTTCCCCACCTTATTGGATCCTTCCAGCATGTTCTACCTCCA  
SRR1269695.5358702.1+ CCACTGCTGCGTTTTCCCCACCTTATTGGATCCTTCCAGCATGTTCTACCTCCA  
SRR1265092.2139034.1- CCACTGCTGCGTTTTCCCCACCTTATTGGATCCTTCCAGCATGTTCTACCTCCA  
SRR1265101.2621422.2- CCACTGCTGCGTTTTCCCCACCTTATTGGATCCTTCCAGCATGTTCTACCTCCA  
SRR1265102.11843773.1- CCACTGCTGCGTTTTCCCCACCTTATTGGATCCTTCCAGCATGTTCTACCTCCA  
SRR1265103.4526646.2+ CCACTGCTGCGTTTTCCCCACCTTATTGGATCCTTCCAGCATGTTCTACCTCCA  
SRR1265103.8617061.1- CCACTGCTGCGTTTTCCCCACCTTATTGGATCCTTCCAGCATGTTCTACCTCCA  
SRR1265107.10953111.1+ CCACTGCTGCGTTTTCCCCACCTTATTGGATCCTTCCAGCATGTTCTACCTCCA  
SRR1265107.11198169.1+ CCACTGCTGCGTTTTCCCCACCTTATTGGATCCTTCCAGCATGTTCTACCTCCA  
SRR1265107.2088771.2- CCACTGCTGCGTTTTCCCCACCTTATTGGATCCTTCCAGCATGTTCTACCTCCA  
SRR1265107.6644656.1- CCACTGCTGCGTTTTCCCCACCTTATTGGATCCTTCCAGCATGTTCTACCTCCA  
SRR1265107.9116199.1- CCACTGCTGCGTTTTCCCCACCTTATTGGATCCTTCCAGCATGTTCTACCTCCA  
SRR1265108.4121277.1- CCACTGCTGCGTTTTCCCCACCTTATTGGATCCTTCCAGCATGTTCTACCTCCA  
SRR1265116.6928798.1+ CCACTGCTGCGTTTTCCCCACCTTATTGGATCCTTCCAGCATGTTCTACCTCCA  
SRR1265120.3033993.2+ CCACTGCTGCGTTTTCCCCACCTTATTGGATCCTTCCAGCATGTTCTACCTCCA  
SRR1265419.2667566.2- CCACTGCTGCGTTTTCCCCACCTTATTGGATCCTTCCAGCATGTTCTACCTCCA  
SRR1265421.10976887.1+ CCACTGCTGCGTTTTCCCCACCTTATTGGATCCTTCCAGCATGTTCTACCTCCA  
SRR1265421.28186333.1+ CCACTGCTGCGTTTTCCCCACCTTATTGGATCCTTCCAGCATGTTCTACCTCCA  
SRR1265421.28387803.2+ CCACTGCTGCGTTTTCCCCACCTTATTGGATCCTTCCAGCATGTTCTACCTCCA  
SRR1265422.12487509.2- CCACTGCTGCGTTTTCCCCACCTTATTGGATCCTTCCAGCATGTTCTACCTCCA  
SRR1265424.13096215.2- CCACTGCTGCGTTTTCCCCACCTTATTGGATCCTTCCAGCATGTTCTACCTCCA  
SRR1265424.14499483.2- CCACTGCTGCGTTTTCCCCACCTTATTGGATCCTTCCAGCATGTTCTACCTCCA  
SRR1265424.4163374.2+ CCACTGCTGCGTTTTCCCCACCTTATTGGATCCTTCCAGCATGTTCTACCTCCA  
SRR1265427.12651809.2- CCACTGCTGCGTTTTCCCCACCTTATTGGATCCTTCCAGCATGTTCTACCTCCA  
SRR1265427.6605459.1+ CCACTGCTGCGTTTTCCCCACCTTATTGGATCCTTCCAGCATGTTCTACCTCCA  
SRR1265430.10892354.1+ CCACTGCTGCGTTTTCCCCACCTTATTGGATCCTTCCAGCATGTTCTACCTCCA  
SRR1265485.8802153.2- CCACTGCTGCGTTTTCCCCACCTTATTGGATCCTTCCAGCATGTTCTACCTCCA  
SRR1265487.10026670.1- CCACTGCTGCGTTTTCCCCACCTTATTGGATCCTTCCAGCATGTTCTACCTCCA  
SRR1265487.15510276.2- CCACTGCTGCGTTTTCCCCACCTTATTGGATCCTTCCAGCATGTTCTACCTCCA  
SRR1265488.7425864.1- CCACTGCTGCGTTTTCCCCACCTTATTGGATCCTTCCAGCATGTTCTACCTCCA  
SRR1265490.7959942.2+ CCACTGCTGCGTTTTCCCCACCTTATTGGATCCTTCCAGCATGTTCTACCTCCA  
SRR1265493.2249139.2- CCACTGCTGCGTTTTCCCCACCTTATTGGATCCTTCCAGCATGTTCTACCTCCA  
SRR1265959.13791605.2+ CCACTGCTGCGTTTTCCCCACCTTATTGGATCCTTCCAGCATGTTCTACCTCCA  
SRR1265959.16757127.1- CCACTGCTGCGTTTTCCCCACCTTATTGGATCCTTCCAGCATGTTCTACCTCCA  
SRR1265960.6622381.1+ CCACTGCTGCGTTTTCCCCACCTTATTGGATCCTTCCAGCATGTTCTACCTCCA  
SRR1266947.12981212.1- CCACTGCTGCGTTTTCCCCACCTTATTGGATCCTTCCAGCATGTTCTACCTCCA  
SRR1266947.22170370.1+ CCACTGCTGCGTTTTCCCCACCTTATTGGATCCTTCCAGCATGTTCTACCTCCA  
SRR1266949.1088605.1- CCACTGCTGCGTTTTCCCCACCTTATTGGATCCTTCCAGCATGTTCTACCTCCA  
SRR1266950.11307404.1- CCACTGCTGCGTTTTCCCCACCTTATTGGATCCTTCCAGCATGTTCTACCTCCA  
SRR1266950.4890096.2- CCACTGCTGCGTTTTCCCCACCTTATTGGATCCTTCCAGCATGTTCTACCTCCA  
SRR1266953.3952558.2+ CCACTGCTGCGTTTTCCCCACCTTATTGGATCCTTCCAGCATGTTCTACCTCCA  
SRR1266954.9977358.1- CCACTGCTGCGTTTTCCCCACCTTATTGGATCCTTCCAGCATGTTCTACCTCCA

SRR1266955.12775171.2- CCACTGCTGCGTTTTCCCCACCTTATTGGATCCTTCCAGCATGTTCTACCTCCACTGGGAC  
SRR1266955.7154550.1+ CCACTGCTGCGTTTTCCCCACCTTATTGGATCCTTCCAGCATGTTCTACCTCCACTGGGAC  
SRR1266957.10574795.2- CCACTGCTGCGTTTTCCCCACCTTATTGGATCCTTCCAGCATGTTCTACCTCCACTGGGAC  
SRR1266957.1389486.2+ CCACTGCTGCGTTTTCCCCACCTTATTGGATCCTTCCAGCATGTTCTACCTCCACTGGGAC  
SRR1266957.3666759.1+ CCACTGCTGCGTTTTCCCCACCTTATTGGATCCTTCCAGCATGTTCTACCTCCACTGGGAC  
SRR1266958.3227986.1- CCACTGCTGCGTTTTCCCCACCTTATTGGATCCTTCCAGCATGTTCTACCTCCACTGGGAC  
SRR1266960.4673203.1- CCACTGCTGCGTTTTCCCCACCTTATTGGATCCTTCCAGCATGTTCTACCTCCACTGGGAC  
SRR1266962.2111129.1- CCACTGCTGCGTTTTCCCCACCTTATTGGATCCTTCCAGCATGTTCTACCTCCACTGGGAC  
SRR1266962.4519620.1- CCACTGCTGCGTTTTCCCCACCTTATTGGATCCTTCCAGCATGTTCTACCTCCACTGGGAC  
SRR1266963.4385495.1+ CCACTGCTGCGTTTTCCCCACCTTATTGGATCCTTCCAGCATGTTCTACCTCCACTGGGAC  
SRR1266965.6800008.2- CCACTGCTGCGTTTTCCCCACCTTATTGGATCCTTCCAGCATGTTCTACCTCCACTGGGAC  
SRR1266965.6865544.1+ CCACTGCTGCGTTTTCCCCACCTTATTGGATCCTTCCAGCATGTTCTACCTCCACTGGGAC  
SRR1266966.1422141.1+ CCACTGCTGCGTTTTCCCCACCTTATTGGATCCTTCCAGCATGTTCTACCTCCACTGGGAC  
SRR1269689.10802270.2+ CCACTGCTGCGTTTTCCCCACCTTATTGGATCCTTCCAGCATGTTCTACCTCCACTGGGAC  
SRR1269689.606782.2+ CCACTGCTGCGTTTTCCCCACCTTATTGGATCCTTCCAGCATGTTCTACCTCCACTGGGAC  
SRR1269690.1324197.2- CCACTGCTGCGTTTTCCCCACCTTATTGGATCCTTCCAGCATGTTCTACCTCCACTGGGAC  
SRR1269690.6701197.1+ CCACTGCTGCGTTTTCCCCACCTTATTGGATCCTTCCAGCATGTTCTACCTCCACTGGGAC  
SRR1269690.8024392.2+ CCACTGCTGCGTTTTCCCCACCTTATTGGATCCTTCCAGCATGTTCTACCTCCACTGGGAC  
SRR1269691.5900866.2+ CCACTGCTGCGTTTTCCCCACCTTATTGGATCCTTCCAGCATGTTCTACCTCCACTGGGAC  
SRR1269692.1681865.1- CCACTGCTGCGTTTTCCCCACCTTATTGGATCCTTCCAGCATGTTCTACCTCCACTGGGAC  
SRR1269693.1880844.2+ CCACTGCTGCGTTTTCCCCACCTTATTGGATCCTTCCAGCATGTTCTACCTCCACTGGGAC  
SRR1269695.5539655.2+ CCACTGCTGCGTTTTCCCCACCTTATTGGATCCTTCCAGCATGTTCTACCTCCACTGGGAC  
SRR1269695.709605.2- CCACTGCTGCGTTTTCCCCACCTTATTGGATCCTTCCAGCATGTTCTACCTCCACTGGGAC  
SRR1269697.3110262.1+ CCACTGCTGCGTTTTCCCCACCTTATTGGATCCTTCCAGCATGTTCTACCTCCACTGGGAC  
SRR1269698.4930714.1- CCACTGCTGCGTTTTCCCCACCTTATTGGATCCTTCCAGCATGTTCTACCTCCACTGGGAC  
SRR1269700.8551703.1+ CCACTGCTGCGTTTTCCCCACCTTATTGGATCCTTCCAGCATGTTCTACCTCCACTGGGAC  
SRR1269700.9464373.2+ CCACTGCTGCGTTTTCCCCACCTTATTGGATCCTTCCAGCATGTTCTACCTCCACTGGGAC  
SRR1269721.7475901.1+ CCACTGCTGCGTTTTCCCCACCTTATTGGATCCTTCCAGCATGTTCTACCTCCACTGGGAC  
SRR1269724.4208407.1+ CCACTGCTGCGTTTTCCCCACCTTATTGGATCCTTCCAGCATGTTCTACCTCCACTGGGAC  
SRR1271605.5228759.1+ CCACTGCTGCGTTTTCCCCACCTTATTGGATCCTTCCAGCATGTTCTACCTCCACTGGGAC  
SRR1271611.45328290.1+ CCACTGCTGCGTTTTCCCCACCTTATTGGATCCTTCCAGCATGTTCTACCTCCACTGGGAC  
SRR1271611.5929085.1+ CCACTGCTGCGTTTTCCCCACCTTATTGGATCCTTCCAGCATGTTCTACCTCCACTGGGAC  
SRR1271612.6213795.1+ CCACTGCTGCGTTTTCCCCACCTTATTGGATCCTTCCAGCATGTTCTACCTCCACTGGGAC  
SRR1271614.6603009.1- CCACTGCTGCGTTTTCCCCACCTTATTGGATCCTTCCAGCATGTTCTACCTCCACTGGGAC  
SRR1271616.4976712.2+ CCACTGCTGCGTTTTCCCCACCTTATTGGATCCTTCCAGCATGTTCTACCTCCACTGGGAC  
SRR1271617.101618594.2+ CCACTGCTGCGTTTTCCCCACCTTATTGGATCCTTCCAGCATGTTCTACCTCCACTGGGAC  
SRR1271617.105521641.1- CCACTGCTGCGTTTTCCCCACCTTATTGGATCCTTCCAGCATGTTCTACCTCCACTGGGAC  
SRR1271617.36691224.1- CCACTGCTGCGTTTTCCCCACCTTATTGGATCCTTCCAGCATGTTCTACCTCCACTGGGAC  
SRR1271617.46820496.1+ CCACTGCTGCGTTTTCCCCACCTTATTGGATCCTTCCAGCATGTTCTACCTCCACTGGGAC  
SRR1271617.81306830.2+ CCACTGCTGCGTTTTCCCCACCTTATTGGATCCTTCCAGCATGTTCTACCTCCACTGGGAC  
SRR1271617.8325012.1+ CCACTGCTGCGTTTTCCCCACCTTATTGGATCCTTCCAGCATGTTCTACCTCCACTGGGAC  
SRR1271618.649812.2+ CCACTGCTGCGTTTTCCCCACCTTATTGGATCCTTCCAGCATGTTCTACCTCCACTGGGAC  
SRR1271619.10258847.1- CCACTGCTGCGTTTTCCCCACCTTATTGGATCCTTCCAGCATGTTCTACCTCCACTGGGAC  
SRR1271620.12578244.2+ CCACTGCTGCGTTTTCCCCACCTTATTGGATCCTTCCAGCATGTTCTACCTCCACTGGGAC  
SRR1271623.12702077.1+ CCACTGCTGCGTTTTCCCCACCTTATTGGATCCTTCCAGCATGTTCTACCTCCACTGGGAC  
SRR1271624.11221728.1- CCACTGCTGCGTTTTCCCCACCTTATTGGATCCTTCCAGCATGTTCTACCTCCACTGGGAC  
SRR1271624.16629241.2- CCACTGCTGCGTTTTCCCCACCTTATTGGATCCTTCCAGCATGTTCTACCTCCACTGGGAC  
SRR1271625.13588244.2+ CCACTGCTGCGTTTTCCCCACCTTATTGGATCCTTCCAGCATGTTCTACCTCCACTGGGAC  
SRR1271626.29048032.1+ CCACTGCTGCGTTTTCCCCACCTTATTGGATCCTTCCAGCATGTTCTACCTCCACTGGGAC  
SRR1271626.39375321.1- CCACTGCTGCGTTTTCCCCACCTTATTGGATCCTTCCAGCATGTTCTACCTCCACTGGGAC  
SRR1271626.8851170.1+ CCACTGCTGCGTTTTCCCCACCTTATTGGATCCTTCCAGCATGTTCTACCTCCACTGGGAC  
SRR1271631.25901633.1+ CCACTGCTGCGTTTTCCCCACCTTATTGGATCCTTCCAGCATGTTCTACCTCCACTGGGAC  
SRR1271631.56868617.2- CCACTGCTGCGTTTTCCCCACCTTATTGGATCCTTCCAGCATGTTCTACCTCCACTGGGAC  
SRR1271634.8456855.2- CCACTGCTGCGTTTTCCCCACCTTATTGGATCCTTCCAGCATGTTCTACCTCCACTGGGAC  
SRR1271636.5617421.2+ CCACTGCTGCGTTTTCCCCACCTTATTGGATCCTTCCAGCATGTTCTACCTCCACTGGGAC  
SRR1271639.11541096.1- CCACTGCTGCGTTTTCCCCACCTTATTGGATCCTTCCAGCATGTTCTACCTCCACTGGGAC  
SRR1271639.16935460.1+ CCACTGCTGCGTTTTCCCCACCTTATTGGATCCTTCCAGCATGTTCTACCTCCACTGGGAC  
SRR1271639.17341141.1+ CCACTGCTGCGTTTTCCCCACCTTATTGGATCCTTCCAGCATGTTCTACCTCCACTGGGAC  
SRR1271641.6014124.1+ CCACTGCTGCGTTTTCCCCACCTTATTGGATCCTTCCAGCATGTTCTACCTCCACTGGGAC  
SRR1271642.5331247.1+ CCACTGCTGCGTTTTCCCCACCTTATTGGATCCTTCCAGCATGTTCTACCTCCACTGGGAC  
SRR1271643.2019678.1+ CCACTGCTGCGTTTTCCCCACCTTATTGGATCCTTCCAGCATGTTCTACCTCCACTGGGAC  
SRR1271644.4072249.1- CCACTGCTGCGTTTTCCCCACCTTATTGGATCCTTCCAGCATGTTCTACCTCCACTGGGAC  
SRR1271660.11124812.1- CCAATGCTGCGTTTTCCCCACCTTATTGGATCCTTCCAGCATGTTCTACCTCCACTGGGAC  
SRR1271660.66535.1- CCACTGCTGCGTTTTCCCCACCTTATTGGATCCTTCCAGCATGTTCTACCTCCACTGGGAC  
SRR1271661.2368772.1+ CCACTGCTGCGTTTTCCCCACCTTATTGGATCCTTCCAGCATGTTCTACCTCCACTGGGAC  
SRR1271662.3330309.1+ CCACTGCTGCGTTTTCCCCACCTTATTGGATCCTTCCAGCATGTTCTACCTCCACTGGGAC  
SRR1271664.7577323.2+ CCACTGCTGCGTTTTCCCCACCTTATTGGATCCTTCCAGCATGTTCTACCTCCACTGGGAC  
SRR1271664.7610027.1+ CCACTGCTGCGTTTTCCCCACCTTATTGGATCCTTCCAGCATGTTCTACCTCCACTGGGAC  
SRR1265429.2980691.2- CACTGCTGCGTTTTCCCCACCTTATTGGATCCTTCCAGCATGTTCTACCTCCACTGGGAC  
SRR1265485.4295901.2- CACTGCTGCGTTTTCCCCACCTTATTGGATCCTTCCAGCATGTTCTACCTCCACTGGGAC  
SRR1271629.16583.1- CACTGCTGCGTTTTCCCCACCTTATTGGATCCTTCCAGCATGTTCTACCTCCACTGGGAC  
SRR1271617.94327348.2+ ACTGCTGCGTTTTCCCCACCTTATTGGATCCTTCCAGCATGTTCTACCTCCACTGGGAC  
SRR1265118.3539444.2- CTGCTGCGTTTTCCCCACCTTATTGGATCCTTCCAGCATGTTCTACCTCCACTGGGAC  
SRR1269701.5896733.2- CTGCTGCGTTTTCCCCACCTTATTGGATCCTTCCAGCATGTTCTACCTCCACTGGGAC  
SRR1269722.10861522.2+ TGCTGCGTTTTCCCCACCTTATTGGATCCTTCCAGCATGTTCTACCTCCACTGGGAC  
SRR1265117.1014705.1- TGCTGCGTTTTCCCCACCTTATTGGATCCTTCCAGCATGTTCTACCTCCACTGGGAC  
SRR1266963.7668173.1+ TGCTGCGTTTTCCCCACCTTATTGGATCCTTCCAGCATGTTCTACCTCCACTGGGAC  
SRR1271606.19163420.1+ TGCTGCGTTTTCCCCACCTTATTGGATCCTTCCAGCATGTTCTACCTCCACTGGGAC  
SRR1271611.41723090.1- TGCTGCGTTTTCCCCACCTTATTGGATCCTTCCAGCATGTTCTACCTCCACTGGGAC  
SRR1271660.27380513.2- TGCTGCGTTTTCCCCACCTTATTGGATCCTTCCAGCATGTTCTACCTCCACTGGGAC  
SRR1266959.4156269.1+ GCTGCGTTTTCCCCACCTTATTGGATCCTTCCAGCATGTTCTACCTCCACTGGGAC  
SRR1271620.8170287.1- GCTGCGTTTTCCCCACCTTATTGGATCCTTCCAGCATGTTCTACCTCCACTGGGAC  
SRR1271625.17771509.1- GCTGCGTTTTCCCCACCTTATTGGATCCTTCCAGCATGTTCTACCTCCACTGGGAC  
SRR1271630.7036120.2- GCTGCGTTTTCCCCACCTTATTGGATCCTTCCAGCATGTTCTACCTCCACTGGGAC

SRR1271631.77846051.2- GCTGCGTTTTCCCCACCTTATTGGATCCTTCCAGCATGTTCTACCTCCACTGGGAC  
SRR1265959.16039523.1- CTGCGTTTTCCCCACCTTATTGGATCCTTCCAGCATGTTCTACCTCCACTGGGAC  
SRR1271656.12001727.1- CTGCGTTTTCCCCTCCTTATTGGATCCTTCCAGCATGTTCTGCCTCCACTGGGAC  
SRR1271656.38998198.1+ CTGCGTTTTCCCCACCTTATTGGATCCTTCCAGCATGTTCTACCTCCACTGGGAC  
SRR1271635.5444837.2- TGCGTTTTCCCCACCTTATTGGATCCTTCCAGCATGTTCTACCTCCACTGGGAC  
SRR1265102.11790677.1+ GCGTTTTCCCCACCTTATTGGATCCTTCCAGCATGTTCTACCTCCACTGGGAC  
SRR1271631.9620063.1+ GCGTTTTCCCCACCTTATTGGATCCTTCCAGCATGTTCTACCTCCACTGGGAC  
SRR1269700.230054.1- CGTTTTCCCCCCTTATTGGATCCTTCCAGCATGTTCTACCTCCACTGGGAC  
SRR1269726.6324567.1+ CGTTTTCCCCACCTTATTGGATCCTTCCAGCATGTTCTACCTCCACTGGGAC  
SRR1265423.4843600.2+ GTTTCACCTTATTGGATCCTTCCAGCATGTTCTACCTCCACTGGGAC  
SRR1266955.9100423.2+ GTTTCACCTTATTGGATCCTTCCAGCATGTTCTACCTCCACTGGGAC  
SRR1266961.12229708.1- GTTTCACCTTATTGGATCCTTCCAGCATGTTCTACCTCCACTGGGAC  
SRR1271635.8499862.2+ GTTTCACCTTATTGGATCCTTCCAGCATGTTCTACCTCCACTGGGAC  
SRR1266963.15703496.1- TTTCCCCACCTTATTGGATCCTTCCAGCATGTTCTCCCTCCACTGGGAC  
SRR1269699.10804333.2- TTTCCCCACCTTATTGGATCCTTCCAGCATGTTCTACCTCCACTGGGAC  
SRR1271633.8205548.2- TTTCCCCACCTTATTGGATCCTTCCAGCATGTTCTACCTCCACTGGGAC  
SRR1271637.6456421.1+ TTCCCCACCTTATTGGATCCTTCCAGCATGTTCTACCTCCACTGGGAC  
SRR1266952.10330331.1+ TCCCCACCTTATTGGATCCTTCCAGCATGTTCTACCTCCACTGGGAC  
SRR1271614.6488833.1- TCCCCACCTTATTGGATCCTTCCAGCATGTTCTCCCTCCACTGGGAC  
SRR1271617.92587535.2- TCCCCACCTTATTGGATCCTTCCAGCATGTTCTGCCTCCACTGGGAC  
SRR1265102.5685651.1- CCCCACCTTATTGGATCCTTCCAGCATGTTCTACCTCCACTGGGAC  
SRR1265424.13766781.2+ CCCCACCTTATTGGATCCTTCCAGCATGTTCTACCTCCACTGGGAC  
SRR1269725.3278979.1+ CCCCACCTTATTGGATCCTTCCAGCATGTTCTACCTCCACTGGGAC  
SRR1266963.9363809.1+ CCCACCTTATTGGATCCTTCCAGCATGTTCTACCTCCACTGGGAC  
SRR1269692.5539705.1+ CCCACCTTATTGGATCCTTCCAGCATGTTCTACCTCCACTGGGAC  
SRR1271626.8342312.2+ CCCACCTTATTGGATCCTTCCAGCATGTTCTACCTCCACTGGGAC  
SRR1271628.3667565.2+ CCCACCTTATTGGATCCTTCCAGCATGTTCTACCTCCACTGGGAC  
SRR1271656.28111822.1- CCCACCTTATTGGATCCTTCCAGCATGTTCTACCTCCACTGGGAC  
SRR1266951.4137283.1+ CCACCTTATTGGATCCTTCCAGCATGTTCTACCTCCACTGGGAC  
SRR1271617.101746624.1- CCACCTTATTGGATCCTTCCAGCATGTTCTACCTCCACTGGGAC  
SRR1271622.6836463.2- CCACCTTATTGGATCCTTCCAGCATGTTCTACCTCCACTGGGAC  
SRR1265961.2742222.1- CACCTTATTGGATCCTTCCAGCATGTTCTACCTCCACTGGGAC  
SRR1266952.1463982.2- CACCTTATTGGATCCTTCCAGCATGTTCTACCGCGCTGGGAC  
SRR1271614.8837036.1+ CACCTTATTGGATCCTTCCAGCATGTTCTACCTCCACTGGGAC  
SRR1271617.32725188.2- ACCTTATTGGATCCTTCCAGCATGTTCTACCTCCACTGGGAC  
SRR1271631.87281188.2- ACCTTATTGGATCCTTCCAGCATGTTCTACCTCCACTGGGAC  
SRR1265421.19234411.1- CCTTATTGGATCCTTCCAGCATGTTCTACCTCCACTGGGAC  
SRR1271611.42557115.2- CCTTATTGGATCCTTCCAGCATGTTCTACCTCCACTGGGAC  
SRR1271625.3981531.1+ CTTATTGGATCCTTCCAGCATGTTCTACCTCCACTGGGAC  
SRR1265118.3202418.2+ CTTATTGGATCCTTCCAGCATGTTCTACCTCCACTGGGAC  
SRR1269720.8521946.1- CTTATTGGATCCTTCCAGCATGTTCTACCTCCACTGGGAC  
SRR1265118.8469183.1+ TTATTGGATCCTTCCAGCATGTTCTACCTCCACTGGGAC  
SRR1265427.10426011.1+ TTATTGGATCCTTCCAGCATGTTCTACCTCCACTGGGAC  
SRR1266964.4594838.2- TTATTGGATCCTTCCAGCATGTTCTACCTCCACTGGGAC  
SRR1271656.18693034.2- TTATTGGATCCTTCCAGCATGTTCTACCTCCACTGGGAC  
SRR1266959.6559141.2+ TATTGGATCCTTCCAGCATGTTCTACCTCCACTGGGAC  
SRR1266962.3051106.2+ TATTGGATCCTTCCAGCATGTTCTACCTCCACTGGGAC  
SRR1271623.14435698.2+ TATTGGATCCTTCCAGCATGTTCTACCTCCACTGGGAC  
SRR1271625.4462362.2- TATTGGATCCTTCCAGCATGTTCTACCTCCACTGGGAC  
SRR1265090.573951.1+ ATTGGATCCTTCCAGCATGTTCTACCTCCACTGGGAC  
SRR1265419.5834061.2- ATTGGATCCTTCCAGCATGTTCTACCTCCACTGGGAC  
SRR1266962.8268942.2- ATTGGATCCTTCCAGCATGTTCTACCTCCACTGGGAC  
SRR1269694.6400404.1+ ATTGGATCCTTCCAGCATGTTCTACCTCCACTGGGAC  
SRR1269727.8758172.1+ ATTGGATCCTTCCAGCATGTTCTACCTCCACTGGGAC  
SRR1271617.87539143.2+ ATTGGATCCTTCCAGCATGTTCTACCTCCACTGGGAC  
SRR1271631.51412202.2- ATTGGATCCTTCCAGCATGTTCTACCTCCACTGGGAC  
SRR1265490.7565460.2+ TTGGATCCTTCCAGCATGTTCTACCTCCACTGGGAC  
SRR1271611.32939716.2+ TTGGATCCTTCCAGCATGTTCTACCTCCACTGGGAC  
SRR1265107.8184323.2+ TGGATCCTTCCAGCATGTTCTACCTCCACTGGGAC  
SRR1265430.3999536.2- TGGAGCCTTCCAGCATGTTCTTCCCTCCACTGGGAC  
SRR1271625.4672091.1- TGGATCCTTCCAGCATGTTCTACCTCCACTGGGAC  
SRR1271625.4974445.2- TGGATACTTCCAGCATGTTCTCCCTCCACTGGGAC  
SRR1265490.12123742.2- GGATCCTTCCAGCATGTTCTACCTCCACTGGGAC  
SRR1269725.9198123.1+ GGATCCTTCCAGCATGTTCTACCTCCACTGGGAC  
SRR1271666.9606214.1- GGATCCTTCCAGCATGTTCTACCTCCACTGGGAC  
SRR1265108.11287257.2+ GATCCTTCCAGCATGTTCTACCTCCACTGGGAC  
SRR1269723.12879211.1+ GATCCTTCCAGCATGTTCTACCTCCACTGGGAC  
SRR1271611.35735582.1- GATCCTTCCAGCATGTTCTACCTCCACTGGGAC  
SRR1271611.45105264.1+ GATCCTTCCAGCATGTTCTACCTCCACTGGGAC  
SRR1271637.7730229.2- GATCCTTCCAGCATGTTCTACCTCCACTGGGAC  
SRR1271663.9467739.2+ GATCCTTCCAGCATGTTCTACCTCCACTGGGAC  
SRR1271605.19945219.1+ ATCCTTCCAGCATGTTCTACCTCCACTGGGAC  
SRR1271606.10370241.1+ ATCCTTCCAGCATGTTCTACCTCCACTGGGAC  
SRR1271618.8223150.2+ ATCCTTCCAGCATGTTCTACCTCCACTGGGAC  
SRR1271617.24478703.2+ TCCTTCCAGCATGTTCTACCTCCACTGGGAC  
SRR1271656.16215479.1- TCCTTCCAGCATGTTCTACCTCCACTGGGAC  
SRR1271656.38998198.2- TCCTTCCAGCATGTTCTACCTCCACTGGGAC  
SRR1265427.13084996.1+ CCTTCCAGCATGTTCTACCTCCACTGGGAC  
SRR1266946.1503677.1- CCTTCCAGCATGTTCTACCTCCACTGGGAC  
SRR1271656.4976182.2+ CTTCCAGCATGTTCTACCTCCACTGGGAC  
SRR1265490.5635851.1+ TTCCAGCATGTTCTACCTCCACTGGGAC  
SRR1269724.1613007.2+ TTCCAGCATGTTCTACCTCCACTGGGAC  
SRR1271628.1578656.2- TTCCAGCATGTTCTACCTCCACTGGGAC  
SRR1271631.73787149.2- TTCCAGCATGTTCTACCTCCACTGGGAC

SRR1271660.7768350.2+  
SRR1271617.29201909.1-  
SRR1271656.27642211.2-  
SRR1271617.18340985.1-  
SRR1271643.6252990.1+  
SRR1265486.4816291.2+  
SRR1265490.1647534.2+  
SRR1266947.1797376.1+  
SRR1269693.657451.2-  
SRR1269724.7736550.2-  
SRR1271625.4440646.1-  
SRR1271626.7870290.2+  
SRR1265101.7863435.2+  
SRR1265119.2075759.2+  
SRR1271660.19489729.2-  
SRR1265425.11836318.2+  
SRR1266959.12652072.2-  
SRR1271638.10108003.1-  
SRR1265107.9762562.1+  
SRR1271630.7776502.2+  
SRR1266964.9683545.2+  
SRR1269724.7878642.2-  
SRR1271617.106361713.1-  
SRR1271631.38795764.1+  
SRR1271637.8462724.1-  
SRR1269724.2351101.2-  
SRR1265424.825035.1+  
SRR1266962.933875.2-  
SRR1269695.4605288.1-  
SRR1269701.962293.1+  
SRR1265094.9258610.2-  
SRR1266963.14618912.2+  
SRR1271627.2433963.2+  
SRR1266962.10797533.1+  
SRR1269702.9206585.1-  
SRR1271636.32970902.1-  
SRR1265108.5336322.1+  
SRR1265485.927570.2+  
SRR1266948.20521025.2-  
SRR1269691.4799971.1+  
SRR1269722.8669002.1+  
SRR1265487.3611936.2-  
SRR1265487.5948289.1+  
SRR1271656.19755138.1+  
SRR1265120.10380681.2+  
SRR1265430.9435022.1-  
SRR1266959.1925156.1+  
SRR1271637.9483811.1+  
SRR1265103.11024313.1+  
SRR1265960.6641003.1-  
SRR1269689.11150721.2+  
SRR1269701.8482472.1+  
SRR1269726.8967180.1-  
SRR1266946.22292515.1-  
SRR1265100.7029791.2-  
SRR1266952.10100495.1-  
SRR1265116.2215467.2+  
SRR1265486.9625524.2+  
SRR1266948.4974750.1+  
SRR1271626.39747880.2-  
SRR1265424.14641649.2+  
SRR1265100.6825972.2+  
SRR1265420.6477611.2+  
SRR1265486.2988089.2-  
SRR1271634.2225500.2-  
SRR1271641.1475015.2-  
SRR1271643.11732587.1-  
SRR1271656.19605949.2+  
SRR1265091.7293804.1-  
SRR1265494.10552009.1+  
SRR1266951.1123610.1+  
SRR1269725.4823828.2+  
SRR1271617.7158444.2-  
SRR1271626.27554490.1+  
SRR1269689.1433856.2+  
SRR1269726.4838196.2-  
SRR1271605.3457147.2+  
SRR1271614.7695441.1+  
SRR1271631.94542648.1+  
SRR1269689.9751428.2+  
SRR1271663.9621731.2+

TTCCAGCATGTTCTACCTCCACTGGGAC  
TCCAGCATGTTCTACCTCCACTGGGAC  
TCCAGCATGTTCTACCTCCACTGGGAC  
CCAGCATGTTCTACCTCCACTGGGAC  
CCAGCATGTTCTACCTCCACTGGGAC  
CAGCATGTTCTACCTCCACTGGGAC  
CAGCATGTTCTACCTCCACTGGGAC  
CAGCATGTTCTACCTCCACTGGGAC  
CAGCATGTTCTACCTCCACTGGGAC  
CAGCATGTTCTACCTCCACTGGGAC  
CAGCATGTTCTACCTCCACTGGGAC  
CAGCATGTTCTACCTCCACTGGGAC  
CAGCATGTTCTACCTCCACTGGGAC  
CAGCATGTTCTACCTCCACTGGGAC  
AGCATGTTCTACCTCCACTGGGAC  
AGCATGTTCTACCTCCACTGGGAC  
AGCATGTTCTTCCCTCCACTGGGAC  
GCATGTTCTACCTCCACTGGGAC  
GCATGTTCTACCTCCACTGGGAC  
GCATGTTCTACCTCCACTGGGAC  
GCATGTTCTACCTCCACTGGGAC  
CATGTTCTACCTCCACTGGGAC  
CATGTTCTACCTCCACTGGGAC  
ATGTTCTACCTCCACTGGGAC  
ATGTTCTACCTCCACTGGGAC  
ATGTTCTACCTCCACTGGGAC  
ATGTTCTACCTCCACTGGGAC  
TGTTTTCCCTCCCTGGGAC  
GTTCTACCTCCACTGGGAC  
GTTCTACCTCCCTGGGAC  
GTTCTACCTCCACTGGGAC  
GTTCTACCTCCACTGGGAC  
TTCTACCTCCACTGGGAC  
TTCTACCTCCACTGGGAC  
TTCTACCTCCACTGGGAC  
TCTACCTCCACTGGGAC  
TCTACCTCCACTGGGAC  
TCTACCTCCACTGGGAC  
CTACCTCCACTGGGAC  
CTACCTCCACTGGGAC  
CTACCTCCACTGGGAC  
CTACCTCCACTGGGAC  
TCCCTCCACTGGGAC  
TACCTCCACTGGGAC  
TACCTCCACTGGGAC  
ACCTCCACTGGGAC  
ACCTCCACTGGGAC  
ACCTCCACTGGGAC  
ACCTCCACTGGGAC  
CCTCCACTGGGAC  
CCTCCACTGGGAC  
CCTCCACTGGGAC  
CCTCCACTGGGAC  
CTCCACTGGGAC  
TCCACTGGGAC  
CCACTGGGAC  
CACTGGGAC  
CACTGGGAC  
CACTGGGAC  
CACTGGGAC  
ACTGGGAC  
CTGGGAC  
CTGGGAC  
CTGGGAC  
CTGGGAC  
CTGGGAC  
CTGGGAC  
CTGGGAC  
CTGGGAC  
TGGGAC  
TGGGAC  
TGGGAC  
TGGGAC  
TGGGAC  
TGGGAC  
TGGGAC  
TGGGAC  
TGGGAC  
GGGAC  
GGAC  
AC  
AC  
AC  
C  
C

consensus

CCACTGCTGCGTTTCCCCACCTTATTGGATCCTTCCAGCATGTTCTACCTCCACTGGGAC

```

      .   :   :   :   :   :   :   :   :   :
SRR1265107.10953111.1+ C
SRR1265108.4121277.1- C
SRR1266965.6800008.2- C
SRR1265422.12487509.2- CA
SRR1271626.8851170.1+ CA
SRR1271639.16935460.1+ CA
SRR1266954.9977358.1- CAC
SRR1266955.12775171.2- CAC
SRR1266958.3227986.1- CAC
SRR1265102.11843773.1- CACG
SRR1265103.4526646.2+ CACG
SRR1266947.12981212.1- CACG
SRR1266953.3952558.2+ CACG
SRR1269700.9464373.2+ CACG
SRR1271634.8456855.2- CACG
SRR1271639.11541096.1- CACG
SRR1271617.105521641.1- CACGA
SRR1269693.1880844.2+ CACGAG
SRR1271660.11124812.1- CACGAG
SRR1271614.6603009.1- CACGAGG
SRR1271641.6014124.1+ CACGAGG
SRR1266947.22170370.1+ CACGAGGA
SRR1271617.101618594.2+ CACGAGGA
SRR1271617.36691224.1- CACGAGGA
SRR1271620.12578244.2+ CACGAGGA
SRR1265120.3033993.2+ CACGAGGAA
SRR1271625.13588244.2+ CACGAGGAA
SRR1265959.16757127.1- CACGAGGAAC
SRR1269724.4208407.1+ CACGAGGAAC
SRR1265485.8802153.2- CACGAGGAACA
SRR1269690.1324197.2- CACGAGGAACA
SRR1266955.7154550.1+ CACGAGGAACAG
SRR1271611.5929085.1+ CACGAGGAACAG
SRR1271617.46820496.1+ CACGAGGAACAG
SRR1265107.2088771.2- CACGAGGAACAGG
SRR1266966.1422141.1+ CACGAGGAACAGGA
SRR1271626.29048032.1+ CACGAGGAACAGGA
SRR1271612.6213795.1+ CACGAGGAACAGGAG
SRR1271636.5617421.2+ CACGAGGAACAGGAG
SRR1271662.3330309.1+ CACGAGGAACAGGAG
SRR1265103.8617061.1- CACGAGGAACAGGAGCTG
SRR1266957.3666759.1+ CACGAGGAACAGGAGCTGA
SRR1271617.8325012.1+ CACGAGGAACAGGAGCTGA
SRR1265107.11198169.1+ CACGAGGAACAGGAGCTGAT
SRR1265959.13791605.2+ CACGAGGAACAGGAGCTGAT
SRR1271619.10258847.1- CACGAGGAACAGGAGCTGAT
SRR1271624.16629241.2- CACGAGGAACAGGAGCTGAT
SRR1265424.14499483.2- CACGAGGAACAGGAGCTGATG
SRR1265487.15510276.2- CACGAGGAACAGGAGCTGATG
SRR1266957.1389486.2+ CACGAGGAACAGGAGCTGATG
SRR1269721.7475901.1+ CACGAGGAACAGGAGCTGATG
SRR1271626.39375321.1- CACGAGGAACAGGAGCTGATG
SRR1271643.2019678.1+ CACGAGGAACAGGAGCTGATG
SRR1266957.10574795.2- CACGAGGAACAGGAGCTGATGA
SRR1271642.5331247.1+ CACGAGGAACAGGAGCTGATGA
SRR1266964.4594838.2- CACGAGGAACANGAGCTGATGAG
SRR1266965.6865544.1+ CACGAGGAACAGGAGCTGATGAG
SRR1271611.45328290.1+ CACGAGGAACAGGAGCTGATGAG
SRR1265107.9116199.1- CACGAGGAACAGGAGCTGATGAGG
SRR1265421.10976887.1+ CACGAGGAACAGGAGCTGATGAGGT
SRR1265421.28186333.1+ CACGAGGAACAGGAGCTGATGAGGT
SRR1265487.10026670.1- CACGAGGAACAGGAGCTGATGAGGT
SRR1269689.606782.2+ CACGAGGAACAGGAGCTGATGAGGT
SRR1265493.2249139.2- CACGAGGAACAGGAGCTGATGAGGTT
SRR1266963.4385495.1+ CACGAGGAACAGGAGCTGATGAGGTT
SRR1271664.7577323.2+ CACGAGGAACAGGAGCTGATGAGGTT
SRR1265421.28387803.2+ CACGAGGAACAGGAGCTGATGAGGTTG
SRR1266950.11307404.1- CACGAGGAACAGGAGCTGATGAGGTTGA
SRR1271639.17341141.1+ CACGAGGAACAGGAGCTGATGAGGTTGA
SRR1265092.2139034.1- CACGAGGAACAGGAGCTGATGAGGTTGAG
SRR1265101.2621422.2- CACGAGGAACAGGAGCTGATGAGGTTGAG
SRR1266960.4673203.1- CACGAGGAACAGGAGCTGATGAGGTTGAG
SRR1269689.10802270.2+ CACGAGGAACAGGAGCTGATGAGGATGAG
SRR1269690.6701197.1+ CACGAGGAACAGGAGCTGATGAGGTTGAG
SRR1269691.5900866.2+ CACGAGGAAAAGGAGCTGATGAGGTTGAG
SRR1269698.4930714.1- CACGAGGAACAGGAGCTGATGAGGTTGAG
SRR1271616.4976712.2+ CACGAGGAACAGGAGCTGATGAGGTTGAG
SRR1271618.649812.2+ CACGAGGAACAGGAGCTGATGAGGTTGAG
SRR1265427.12651809.2- CACGAGGAACAGGAGCTGATGAGGTTGAGC
SRR1265427.6605459.1+ CACGAGGAACAGGAGCTGATGAGGTTGAGC
SRR1266950.4890096.2- CACGAGGAACAGGAGCTGATGAGGTTGAGC
SRR1271631.56868617.2- CACGAGGAACAGGAGCTGATGAGGTTGAGC
SRR1266962.4519620.1- CACGAGGAACAGGAGCTGATGAGGTTGAGCTG

```

SRR1271661.2368772.1+ CACGAGGAACAGGAGCTGATGAGGTTGAGCTG  
SRR1265424.4163374.2+ CACGAGGAACAGGAGCTGATGAGGTTGAGCTGC  
SRR1266949.1088605.1- CACGAGGAACAGGAGCTGATGAGGTTGAGCTGC  
SRR1269690.8024392.2+ CACGAGGAACAGGAGCTGATGAGGTTGAGCTGC  
SRR1271623.12702077.1+ CACGAGGAACAGGAGCTGATGAGGTTGAGCTGC  
SRR1271660.66535.1- CACGAGGAACAGGAGCTGATGAGGTTGAGCTGCC  
SRR1265107.6644656.1- CACGAGGAACAGGAGCTGATGAGGTTGAGCTGCACA  
SRR1271631.25901633.1+ CACGAGGAACAGGAGCTGATGAGGTTGAGCTGCACA  
SRR1271644.4072249.1- CACGAGGAACAGGAGCTGATGAGGTTGAGCTGCACA  
SRR1265430.10892354.1+ CACGAGGAACAGGAGCTGATGAGGTTGAGCTGCACAT  
SRR1266962.2111129.1- CACGAGGAACAGGAGCTGATGAGGTTGAGCTGCACAT  
SRR1269695.709605.2- CACGAGGAACAGGAGCTGATGAGGTTGAGCTGCACAT  
SRR1271605.5228759.1+ CACGAGGAACAGGAGCTGATGAGGTTGAGCTGCACAT  
SRR1269695.5539655.2+ CACGAGGAACAGGAGCTGATGAGGTTGAGCTGCCCATC  
SRR1271624.11221728.1- CACGAGGAACAGGAGCTGATGAGGTTGAGCTGCCCATC  
SRR1265116.6928798.1+ CACGAGGAACAGGAGCTGATGAGGTTGAGCTGCACATCC  
SRR1265419.2667566.2- CACGAGGAACAGGAGCTGATGAGGTTGAGCTGCACATCC  
SRR1265488.7425864.1- CACGAGGAACAGGAGCTGATGAGGTTGAGCTGCCCATCC  
SRR1269697.3110262.1+ CACGAGGAACAGGAGCTGATGAGGTTGAGCTGCACATCC  
SRR1271617.81306830.2+ CACGAGGAACAGGAGCTGATGAGGTTGAGCTGCACATCC  
SRR1265490.7959942.2+ CACGAGGAACAGGAGCTGATGAGGTTGAGCTGCACATCCA  
SRR1265960.6622381.1+ CACGAGGAACAGGAGCTGATGAGGTTGAGCTGCCCATCCA  
SRR1271664.7610027.1+ CACGAGGAACAGGAGCTGATGAGGTTGAGCTGCCCATCCA  
SRR1265429.2980691.2- CACGAGGAACAGGAGCTGATGAGGTTGAGCTGCACATCCAC  
SRR1265485.4295901.2- CACGAGGAACAGGAGCTGATGAGGTTGAGCTGCCCATCCAC  
SRR1271629.16583.1- CACGAGGAACAGGAGCTGATGAGGTTGAGCTGCCCATCCAC  
SRR1271617.94327348.2+ CACGAGGAACAGGAGCTGATGAGGTTGAGCTGCACATCCACA  
SRR1271631.77846051.2- CACGAGGAACAGGAGCTGATGAGGTTGAGCTGCCCATCCACA  
SRR1265118.3539444.2- CACGAGGAACAGGAGCTGATGAGGTTGAGCTGCACATCCACAC  
SRR1269701.5896733.2- CACGAGGAACAGGAGCTGATGAGGTTGAGCTGCACATCCACAC  
SRR1269722.10861522.2+ CACGAGGAACAGGAGCTGATGAGGTTGAGCTGCACATCCACAC  
SRR1265117.1014705.1- CACGAGGAACAGGAGCTGATGAGGTTGAGCTGCACATCCACACA  
SRR1266963.7668173.1+ CACGAGGAACAGGAGCTGATGAGGTTGAGCTGCACATCCACACA  
SRR1271606.19163420.1+ CACGAGGAACAGGAGCTGATGAGGTTGAGCTGAACATCCACACA  
SRR1271611.41723090.1- CACGAGGAACAGGAGCTGATGAGGTTGAGCTGCACATCCACACA  
SRR1271660.27380513.2- CACGAGGAACAGGAGCTGATGAGGTTGAGCTGCACATCCACACA  
SRR1266959.4156269.1+ CACGAGGAACAGGAGCTGATGAGGTTGAGCTGCCCATCCACACAA  
SRR1271620.8170287.1- CACGAGGAACAGGAGCTGATGAGGTTGAGCTGCACATCCACACAA  
SRR1271625.17771509.1- CACGAGGAACAGGAGCTGATGAGGTTGAGCTGCCCATCCACACAA  
SRR1271630.7036120.2- CACGAGGAACAGGAGCTGATGAGGTTGAGCTGCACATCCACACAA  
SRR1265959.16039523.1- CACGAGGAACAGGAGCTGATGAGGTTGAGCTGCCCATCCACACAA  
SRR1271656.12001727.1- CACGAGGAACAGGAGCTGATGAGGTTGAGCTGCACATCCACACAA  
SRR1271656.38998198.1+ CACGAGGAACAGGAGCTGATGAGGTTGAGCTGCACATCCACACAA  
SRR1271635.5444837.2- CACGAGGAACAGGAGCTGATGAGGTTGAGCTGCACATCCACACAACT  
SRR1265102.11790677.1+ CACGAGGAACAGGAGCTGATGAGGTTGAGCTGCCCATCCACACAACTG  
SRR1271631.9620063.1+ CACGAGGAACAGGAGCTGATGAGGTTGAGCTGCACATCCACACAACTG  
SRR1269700.230054.1- CACGAGGAACAGGAGCTGATGAGGTTGAGCTGCACATCCACACAACTGG  
SRR1269726.6324567.1+ CACGAGGAACAGGAGCTGATGAGGTTGAGCTGCACATCCACACAACTGG  
SRR1265423.4843600.2+ CACGAGGAACAGGAGCTGATGAGGTTGAGCTGCCCATCCACACAACTGGC  
SRR1266955.9100423.2+ CACGAGGAACAGGAGCTGATGAGGTTGAGCTGCCAATCCACACAACTGGC  
SRR1266961.12229708.1- CACGAGGAACAGGAGCTGATGAGGTTGAGCTGCCCATCCACACAACTGGC  
SRR1271635.8499862.2+ CACGAGGAACAGGAGCTGATGAGGTTGAGCTGCCCATCCACACAACTGGC  
SRR1266963.15703496.1- CACGAGGAACAGGAGCTGATGAGGTTGAGCTGCACATCCACACAACTGGCT  
SRR1269699.10804333.2- CACGAGGAACAAGAGCTGATGAGGTTGAGCTGCACATCCACACAACTGGCT  
SRR1271633.8205548.2- CACGAGGAACAGGAGCTGATGAGGTTGAGCTGCCCATCCACACAACTGGCT  
SRR1271637.6456421.1+ CACGAGGAACAGGAGCTGATGAGGTTGAGCTGCACATCCACACAACTGGCTG  
SRR1266952.10330331.1+ CACGAGGAACAGGAGCTGATGAGGTTGAGCTGCACATCCACACAACTGGCTGG  
SRR1271614.6488833.1- CACGAGGAACAGGAGCTGATGAGGTTGAGCTGCACATCCACACAACTGGCTGG  
SRR1271617.92587535.2- CACGAGGAACAGGAGCTGATGAGGTTGAGCTGCACATCCACACAACTGGCTGG  
SRR1265102.5685651.1- CACGAGGAACAGGAGCTGATGAGGTTGAGCTGCACATCCACACAACTGGCTGGA  
SRR1265424.13766781.2+ CACGAGGAACAGGAGCTGATGAGGTTGAGCTGCACATCCACACAACTGGCTGGA  
SRR1269725.3278979.1+ CACGAGGAACAGGAGCTGATGAGGTTGAGCTGCACATCCACACAACTGGCTGGA  
SRR1271630.7776502.2+ CACAAGGAACAGGAGCTGACGAGGTTGAGCTGCACATCCACACAACTGGCTGGA  
SRR1266952.1463982.2- CACGAGGACCAGGATCTGATGAGGTTGAGCTGCACATCCACACAACTGGCTGGAT  
SRR1266963.9363809.1+ CACGAGGAACAGGAGCTGATGAGGTTGAGCTGCCCATCCACACAACTGGCTGGAT  
SRR1269692.5539705.1+ CACGAGGAACAGGAGCTGATGAGGTTGAGCTGCACATCCACACAACTGGCTGGAT  
SRR1271622.6836463.2- CACGAGGAACAGGAGCTGATGAGGTTGAGCTGCCCATCCACACAACTGGCTGGAT  
SRR1271625.3981531.1+ CACGAGGAACAGGAGCTGATGAGGTTGAGCTGCCCATCCACACAACTGGCTGGAT  
SRR1271626.8342312.2+ CACGAGGAACAGGAGCTGATGAGGTTGAGCTGCCCATCCACACAACTGGCTGGAT  
SRR1271628.3667565.2+ CACGAGGAACAGGAGCTGATGAGGTTGAGCTGCCCATCCACACAACTGGCTGGAT  
SRR1271656.28111822.1- CACGAGGAACAGGAGCTGATGAGGTTGAGCTGCACATCCACACAACTGGCTGGAT  
SRR1266951.4137283.1+ CACGAGGAACAGGAGCTGATGAGGTTGAGCTGCACATCCACACAACTGGCTGGATG  
SRR1271611.42557115.2- CACGAGGAACAGGAGCTGATGAGGTTGAGCTGCACATCCACACAACTGGCTGGATG  
SRR1271617.101746624.1- CACGAGGAACAGGAGCTGATGAGGTTGAGCTGCACATCCACACAACTGGCTGGATG  
SRR1265961.2742222.1- CACGAGGAACAGGAGCTGATGAGGTTGAGCTGCCCATCCACACAACTGGCTGGATGG  
SRR1271614.8837036.1+ CACGAGGAACAGGAGCTGATGAGGTTGAGCTGCACATCCACACAACTGGCTGGATGG  
SRR1265421.19234411.1- CACGAGGAACAGGAGCTGATGAGGTTGAGCTGCACATCCACACAACTGGCTGGATGGC  
SRR1271617.32725188.2- CACGAGGAACAGGAGCTGATGAGGTTGAGCTGCACATCCACACAACTGGCTGGATGGC  
SRR1271631.87281188.2- CACGAGGAACAGGAGCTGATGAGGTTGAGCTGCCCATCCACACAACTGGCTGGATGGC  
SRR1265090.573951.1+ CACGAGGAACAGGAGCTGATGAGGTTGAGCTGCACATCCACACAACTGGCTGGATGGC  
SRR1265091.7293804.1- CACGAGGAACAGGAGCTGATGAGGTTGAGCTGCACATCCACACAACTGGCTGGATGGC  
SRR1265094.9258610.2- CACGAGGAACAGGAGCTGATGAGGTTGAGCTGCACATCCACACAACTGGCTGGATGGC  
SRR1265100.6825972.2+ CACGAGGAACAGGAGCTGATGAGGTTGAGCTGCCCATCCACACAACTGGCTGGATGGC  
SRR1265100.7029791.2- CACGAGGAACAGGAGCTGATGAGGTTGAGCTGCCCATCCACACAACTGGCTGGATGGC

SRR1265101.7863435.2+ CACGAGGAACAGGAGCTGATGAGGTTGAGCTGCACATCCACACAACCTGGCTGGATGGCAT  
SRR1265103.11024313.1+ CACGAGGAACAGGAGCTGATGAGGTTGAGCTGCCATCCACACAACCTGGCTGGATGGCAT  
SRR1265103.9204126.1+ CACGAGGAACAGGAGCTGATGAGGTTGAGCTGCACATCCACACAACCTGGCTGGATGGCAT  
SRR1265107.8184323.2+ CACGAGGAACAGGAGCTGATGAGGTTGAGCTGCACATCCACACAACCTGGCTGGATGGCAT  
SRR1265107.9762562.1+ CACGAGGAACAGGAGCTGATGAGGTTGAGCTGCACATCCACACAACCTGGCTGGATGGCAT  
SRR1265108.11287257.2+ CACGAGGAACAGGAGCTGATGAGGTTGAGCTGCACATCCACACAACCTGGCTGGATGGCAT  
SRR1265108.5336322.1+ CACGAGGAACAGGAGCTGATGAGGTTGAGCTGCACATCCACACAACCTGGCTGGATGGCAT  
SRR1265116.2215467.2+ CACGAGGAACAGGAGCTGATGAGGTTGAGCTGCACATCCACACAACCTGGCTGGATGGCAT  
SRR1265118.3202418.2+ CACGAGGAACAGGAGCTGATGAGGTTGAGCTGCACATCCACACAACCTGGCTGGATGGCAT  
SRR1265118.8469183.1+ CACGAGGAACAGGAGCTGATGAGGTTGAGCTGCACATCCACACAACCTGGCTGGATGGCAT  
SRR1265119.2075759.2+ CACGAGGAACAGGAGCTGATGAGGTTGAGCTGCACATCCACACAACCTGGCTGGATGGCAT  
SRR1265120.10380681.2+ CACGAGGAACAGGAGCTGATGAGGTTGAGCTGCACATCCACACAACCTGGCTGGATGGCAT  
SRR1265419.5834061.2- CACGAGGAACAGGAGCTGATGAGGTTGAGCTGCACATCCACACAACCTGGCTGGATGGCAT  
SRR1265420.6477611.2+ CACGAGGAACAGGAGCTGATGAGGTTGAGCTGCACATCCACACAACCTGGCTGGATGGCAT  
SRR1265424.14641649.2+ CACGAGGAACAGGAGCTGATGAGGTTGAGCTGCACATCCACACAACCTGGCTGGATGGCAT  
SRR1265424.825035.1+ CACGAGGAACAGGAGCTGATGAGGTTGAGCTGCACATCCACACAACCTGGCTGGATGGCAT  
SRR1265425.11836318.2+ CACGAGGAACAGGAGCTGATGAGGTTGAGCTGCCATCCACACAACCTGGCTGGATGGCAT  
SRR1265427.10426011.1+ CACGAGGAACAGGAGCTGATGAGGTTGAGCTGCACATCCACACAACCTGGCTGGATGGCAT  
SRR1265427.13084996.1+ CACGAGGAACAGGAGCTGATGAGGTTGAGCTGCCATCCACACAACCTGGCTGGATGGCAT  
SRR1265430.3999536.2- CACGAGGAACAGGAGCTGATGAGGTTGAGCTGCACATCCACACAACCTGGCTGGATGGCAT  
SRR1265430.9435022.1- CACGAGGAACAGGAGCTGATGAGGTTGAGCTGCACATCCACACAACCTGGCTGGATGGCAT  
SRR1265485.927570.2+ CACGAGGAACANGAGCTGATGAGGTTGAGCTGCCATCCACACAACCTGGCTGGATGGCAT  
SRR1265486.2988089.2- CACGAGGAACAGGAGCTGATGAGGTTGAGCTGCACATCCACACAACCTGGCTGGATGGCAT  
SRR1265486.4816291.2+ CACGAGGAACAGGAGCTGATGAGGTTGAGCTGCCATCCACACAACCTGGCTGGATGGCAT  
SRR1265486.9625524.2+ CACGAGGAACAGGAGCTGATGAGGTTGAGCTGCCATCCACACAACCTGGCTGGATGGCAT  
SRR1265487.3611936.2- CACGAGGAACAGGAGCTGATGAGGTTGAGCTGCCATCCACACAACCTGGCTGGATGGCAT  
SRR1265487.5948289.1+ CACGAGGAACAGGAGCTGATGAGGTTGAGCTGACCATCCACACAACCTGGCTGGATGGCAT  
SRR1265490.12123742.2- CACGAGGAACAGGAGCTGATGAGGTTGAGCTGCACATCCACACAACCTGGCTGGATGGCAT  
SRR1265490.1647534.2+ CACGAGGAACAGGAGCTGATGAGGTTGAGCTGCACATCCACACAACCTGGCTGGATGGCAT  
SRR1265490.5635851.1+ CACGAGGAACAGGAGCTGATGAGGTTGAGCTGCACATCCACACAACCTGGCTGGATGGCAT  
SRR1265490.7565460.2+ CACGAGGAACAGGAGCTGATGAGGTTGAGCTGCACATCCACACAACCTGGCTGGATGGCAT  
SRR1265494.10552009.1+ CACGAGGAACAGGAGCTGATGAGGTTGAGCTGCACATCCACACAACCTGGCTGGATGGCAT  
SRR1265960.6641003.1- CACGAGGAACAGGAGCTGATGAGGTTGAGCTGCCATCCACACAACCTGGCTGGATGGCAT  
SRR1266946.1503677.1- CACGAGGAACAGGAGCTGATGAGGTTGAGCTGCACATCCACACAACCTGGCTGGATGGCAT  
SRR1266946.22292515.1- CACGAGGAACAGGAGCTGATGAGGTTGAGCTGCACATCCACACAACCTGGCTGGATGGCAT  
SRR1266947.1797376.1+ CACGAGGAACAGGAGCTGATGAGGTTGAGCTGCACATCCACACAACCTGGCTGGATGGCAT  
SRR1266948.20521025.2- CACGAGGAACAGGAGCTGATGAGGTTGAGCTGCCATCCACACAACCTGGCTGGATGGCAT  
SRR1266948.4974750.1+ CACGAGGAACAGGAGCTGATGAGGTTGAGCTGCCATCCACACAACCTGGCTGGATGGCAT  
SRR1266951.1123610.1+ CACGAGGAACAGGAGCTGATGAGGTTGAGCTGCACATCCACACAACCTGGCTGGATGGCAT  
SRR1266952.10100495.1- CACGAGGAACAGGAGCTGATGAGGTTGAGCTGCACATCCACACAACCTGGCTGGATGGCAT  
SRR1266959.12652072.2- CACGAGGAACAGGAGCTGATGAGGTTGAGCTGCACATCCACACAACCTGGCTGGATGGCAT  
SRR1266959.1925156.1+ CACGAGGAACAGGAGCTGATGAGGTTGAGCTGCACATCCACACAACCTGGCTGGATGGCAT  
SRR1266959.6559141.2+ CACGAGGAACAGGAGCTGATGAGGTTGAGCTGCACATCCACACAACCTGGCTGGATGGCAT  
SRR1266962.10797533.1+ CACGAGGAACAGGAGCTGATGAGGTTGAGCTGCCATCCACACAACCTGGCTGGATGGCAT  
SRR1266962.3051106.2+ CACGAGGAACAGGAGCTGATGAGGTTGAGCTGCACATCCACACAACCTGGCTGGATGGCAT  
SRR1266962.8268942.2- CACGAGGAACAGGAGCTGATGAGGTTGAGCTGCCATCCACACAACCTGGCTGGATGGCAT  
SRR1266962.933875.2- CACGAGGAACAGGAGCTGATGAGGTTGAGCTGCACATCCACACAACCTGGCTGGATGGCAT  
SRR1266963.14618912.2+ CACGAGGAACAGGAGCTGATGAGGTTGAGCTGCACATCCACACAACCTGGCTGGATGGCAT  
SRR1266964.9683545.2+ CACGAGGAACAGGAGCTGATGAGGTTGAGCTGCACATCCACACAACCTGGCTGGATGGCAT  
SRR1266968.11150721.2+ CACGAGGAACAGGAGCTGATGAGGTTGAGCTGCACATCCACACAACCTGGCTGGATGGCAT  
SRR1266968.1433856.2+ CACGAGGAACAGGAGCTGATGAGGTTGAGCTGCACATCCACACAACCTGGCTGGATGGCAT  
SRR1266968.9751428.2+ CACGAGGAACAGGAGCTGATGAGGTTGAGCTGCACATCCACACAACCTGGCTGGATGGCAT  
SRR1266969.4799971.1+ CACGAGGAACAGGAGCTGATGAGGTTGAGCTGCACATCCACACAACCTGGCTGGATGGCAT  
SRR1266969.657451.2- CACGAGGAACAGGAGCTGATGAGGTTGAGCTGCACATCCACACAACCTGGCTGGATGGCAT  
SRR1266969.6400404.1+ CACGAGGAACAGGAGCTGATGAGGTTGAGCTGCCATCCACACAACCTGGCTGGATGGCAT  
SRR1266969.4605288.1- CACGAGGAACAGGAGCTGATGAGGTTGAGCTGCACATCCACACAACCTGGCTGGATGGCAT  
SRR1269701.8482472.1+ CACGAGGAACAGGAGCTGATGAGGTTGAGCTGCACATCCACACAACCTGGCTGGATGGCAT  
SRR1269701.962293.1+ CACGAGGAACAGGAGCTGATGAGGTTGAGCTGCACATCCACACAACCTGGCTGGATGGCAT  
SRR1269702.9206585.1- CACGAGGAACAGGAGCTGATGAGGTTGAGCTGCACATCCACACAACCTGGCTGGATGGCAT  
SRR1269720.8521946.1- CACGAGGAACAGGAGCTGATGAGGTTGAGCTGCACATCCACACAACCTGGCTGGATGGCAT  
SRR1269722.8669002.1+ CACGAGGAACAGGAGCTGATGAGGTTGAGCTGCACATCCACACAACCTGGCTGGATGGCAT  
SRR1269723.12879211.1+ CACGAGGAACAGGAGCTGATGAGGTTGAGCTGCACATCCACACAACCTGGCTGGATGGCAT  
SRR1269724.1613007.2+ CACGAGGAACAGGAGCTGATGAGGTTGAGCTGCACATCCACACAACCTGGCTGGATGGCAT  
SRR1269724.2351101.2- CACGAGGAACAGGAGCTGATGAGGTTGAGCTGCACATCCACACAACCTGGCTGGATGGCAT  
SRR1269724.7736550.2- CACGAGGAACAGGAGCTGATGAGGTTGAGCTGCACATCCACACAACCTGGCTGGATGGCAT  
SRR1269724.7878642.2- CACGAGGAACAGGAGCTGATGAGGTTGAGCTGCACATCCACACAACCTGGCTGGATGGCAT  
SRR1269725.4823828.2+ CACGAGGAACAGGAGCTGATGAGGTTGAGCTGCACATCCACACAACCTGGCTGGATGGCAT  
SRR1269725.9198123.1+ CACGAGGAACAGGAGCTGATGAGGTTGAGCTGCACATCCACACAACCTGGCTGGATGGCAT  
SRR1269726.4838196.2- CACGAGGAACAGGAGCTGATGAGGTTGAGCTGCACATCCACACAACCTGGCTGGATGGCAT  
SRR1269726.8967180.1- CACGAGGAACAGGAGCTGATGAGGTTGAGCTGCACATCCACACAACCTGGCTGGATGGCAT  
SRR1269727.8758172.1+ CACGAGGAACAGGAGCTGATGAGGTTGAGCTGCACATCCACACAACCTGGCTGGATGGCAT  
SRR1271605.19945219.1+ CACGAGGAACAGGAGCTGATGCGGTTGAGCTGCACATCCACACAACCTGGCTGGATGGCAT  
SRR1271605.3457147.2+ CACGAGGAACAGGAGCTGATGAGGTTGAGCTGCACATCCACACAACCTGGCTGGATGGCAT  
SRR1271606.10370241.1+ CACGAGGAACAGGAGCTGATGAGGTTGAGCTGCACATCCACACAACCTGGCTGGATGGCAT  
SRR1271611.32939716.2+ CACGAGGAACAGGAGCTGATGAGGTTGAGCTGCACATCCACACAACCTGGCTGGATGGCAT  
SRR1271611.35735582.1- CACGAGGAACAGGAGCTGATGAGGTTGAGCTGCACATCCACACAACCTGGCTGGATGGCAT  
SRR1271611.45105264.1+ CACGAGGAACAGGAGCTGATGAGGTTGAGCTGCACATCCACACAACCTGGCTGGATGGCAT  
SRR1271614.7695441.1+ CACGAGGAACAGGAGCTGATGAGGTTGAGCTGCACATCCACACAACCTGGCTGGATGGCAT  
SRR1271617.106361713.1- CACGAGGAACAGGAGCTGATGAGGTTGAGCTGCACATCCACACAACCTGGCTGGATGGCAT  
SRR1271617.18340985.1- CACGAGGAACAGGAGCTGATGAGGTTGAGCTGCACATCCACACAACCTGGCTGGATGGCAT  
SRR1271617.24478703.2+ CACGAGGAACAGGAGCTGATGAGGTTGAGCTGCACATCCACACAACCTGGCTGGATGGCAT  
SRR1271617.29201909.1- CACGAGGAACAGGAGCTGATGAGGTTGAGCTGCACATCCACACAACCTGGCTGGATGGCAT  
SRR1271617.7158444.2- CACGAGGAACAGGAGCTGATGAGGTTGAGCTGCACATCCACACAACCTGGCTGGATGGCAT  
SRR1271617.87539143.2+ CACGAGGAACAGGAGCTGATGAGGTTGAGCTGCACATCCACACAACCTGGCTGGATGGCAT

SRR1271618.8223150.2+ CACGAGGAACAGGAGCTGATGAGGTTGAGCTGCACATCCACACAACCTGGCTGGATGGCAT  
SRR1271623.14435698.2+ CACGAGGAACAGGAGCTGATGAGGTTGAGCTGCCCATCCACACAACCTGGCTGGATGGCAT  
SRR1271625.4440646.1- CACGAGGAACAGGAGCTGATGAGGTTGAGCTGCCCATCCACACAACCTGGCTGGATGGCAT  
SRR1271625.4462362.2- CACGAGGAACAGGAGCTGATGAGGTTGAGCTGCCCATCCACACAACCTGGCTGGATGGCAT  
SRR1271625.4672091.1- CACGAGGAACAGGAGCTGATGAGGTTGAGCTGCCCATCCACACAACCTGGCTGGATGGCAT  
SRR1271625.4974445.2- CACGAGGAACAGGAGCTGATGAGGTTGAGCTGCCCATCCACACAACCTGGCTGGATGGCAT  
SRR1271626.27554490.1+ CACGAGGAACAGGAGCTGATGAGGTTGAGCTGCCCATCCACACAACCTGGCTGGATGGCAT  
SRR1271626.39100757.2+ CACGAGGAACAGGAGCTGATGAGGTTGAGCTGCCCATCCACACAACCTGGCTGGATGGCAT  
SRR1271626.39747880.2- CACGAGGAACAGGAGCTGATGAGGTTGAGCTGCCCATCCACACAACCTGGCTGGATGGCAT  
SRR1271626.7870290.2+ CACGAGGAACAGGAGCTGATGAGGTTGAGCTGCCCATCCACACAACCTGGCTGGATGGCAT  
SRR1271627.2433963.2+ CACGAGGAACAGGAGCTGATGAGGTTGAGCTGCCCATCCACACAACCTGGCTGGATGGCAT  
SRR1271628.1578656.2- CACGAGGAACAGGAGCTGATGAGGTTGAGCTGCCCATCCACACAACCTGGCTGGATGGCAT  
SRR1271631.38795764.1+ CACGAGGAACAGGAGCTGATGAGGTTGAGCTGCCCATCCACACAACCTGGCTGGATGGCAT  
SRR1271631.51412202.2- CACGAGGAACAGGAGCTCATGAGCTTCAGCTGCCCATCCACACAACCTGGCTGGATGGCAT  
SRR1271631.73787149.2- CACGAGGAACAGGAGCTGATGAGGTTGAGCTGCCCATCCACACAACCTGGCTGGATGGCAT  
SRR1271631.94542648.1+ CACGAGGAACAGGAGCTGATGAGGTTGAGCTGCCCATCCACACAACCTGGCTGGATGGCAT  
SRR1271634.2225500.2- CACGAGGAAAAGGAGCTGATGGTGTGAGCTGCCAACCACACAACCTGGCTGGATGGGAT  
SRR1271636.32970902.1- CACGAGGAACAGGAGCTGATGAGGTTGAGCTGCCCATCCACACAACCTGGCTGGATGGCAT  
SRR1271637.7730229.2- CACGAGGAACAGGAGCTGATGAGGTTGAGCTGCCCATCCACACAACCTGGCTGGATGGCAT  
SRR1271637.8462724.1- CACGAGGAACAGGAGCTGATGAGGTTGAGCTGCCCATCCACACAACCTGGCTGGATGGCAT  
SRR1271637.9483811.1+ CACGAGGAACAGGAGCTGATGAGGTTGAGCTGCCCATCCACACAACCTGGCTGGATGGCAT  
SRR1271638.10108003.1- CACGAGGAACAGGAGCTGATGAGGTTGAGCTGCCCATCCACACAACCTGGCTGGATGGCAT  
SRR1271641.1475015.2- CACGAGGAACAGGAGCTGATGAGGTTGAGCTGCCCATCCACACAACCTGGCTGGATGGCAT  
SRR1271643.11732587.1- CACGAGGAACAGGAGCTGATGAGGTTGAGCTGCCCATCCACACAACCTGGCTGGATGGCAT  
SRR1271643.6252990.1+ CACGAGGAACAGGAGCTGATGAGGTTGAGCTGCCCATCCACACAACCTGGCTGGATGGCAT  
SRR1271656.16215479.1- CACGAGGAACAGGAGCTGATGAGGTTGAGCTGCCCATCCACACAACCTGGCTGGATGGCAT  
SRR1271656.18693034.2- CACGAGGAACAGGAGCTGATGAGGTTGAGCTGCCCATCCACACAACCTGGCTGGATGGCAT  
SRR1271656.19605949.2+ CACGAGGAACAGGAGCTGATGAGGTTGAGCTGCCCATCCACACAACCTGGCTGGATGGCAT  
SRR1271656.19755138.1+ CACGAGGAACAGGAGCTGATGAGGTTGAGCTGCCCATCCACACAACCTGGCTGGATGGCAT  
SRR1271656.27642211.2- CACGAGGAACAGGAGCTGATGAGGTTGAGCTGCCCATCCACACAACCTGGCTGGATGGCAT  
SRR1271656.38998198.2- CACGAGGAACAGGAGCTGATGAGGTTGAGCTGCCCATCCACACAACCTGGCTGGATGGCAT  
SRR1271656.4976182.2+ CACGAGGAACAGGAGCTGATGAGGTTGAGCTGCCCATCCACACAACCTGGCTGGATGGCAT  
SRR1271660.19489729.2- CACGAGGAACAGGAGCTGATGAGGTTGAGCTGCCCATCCACACAACCTGGCTGGATGGCAT  
SRR1271660.7768350.2+ CACGAGGAACAGGAGCTGATGAGGTTGAGCTGCCCATCCACACAACCTGGCTGGATGGCAT  
SRR1271663.9467739.2+ CACGAGGAACAGGAGCTGATGAGGTTGAGCTGCCCATCCACACAACCTGGCTGGATGGCAT  
SRR1271663.9621731.2+ CACGAGGAACAGGAGCTGATGAGGTTGAGCTGCCCATCCACACAACCTGGCTGGATGGCAT  
SRR1271666.9606214.1- CACGAGGAACAGGAGCTGATGAGGTTGAGCTGCCCATCCACACAACCTGGCTGGATGGCAT  
SRR1266966.10206312.2+ ACAGGAACAGGAGCTGATGAGGTTGAGCTGCCCATCCACACAACCTGGCTGGATGGCAT  
SRR1271617.46091166.2- ACGAGGAACAGGAGCTGATGAGGTTGAGCTGCCCATCCACACAACCTGGCTGGATGGCAT  
SRR1271626.2595264.2+ ACGAGGAACAGGAGCTGATGAGGTTGAGCTGCCCATCCACACAACCTGGCTGGATGGCAT  
SRR1271631.36011479.1+ ACGAGGAACAGGAGCTGATGAGGTTGAGCTGCCCATCCACACAACCTGGCTGGATGGCAT  
SRR1271638.17228052.2+ ACGAGGAACAGGAGCTGATGAGGTTGAGCTGCCCATCCACACAACCTGGCTGGATGGCAT  
SRR1265118.2132389.2+ CGAGGAACAGGAGCTGATGAGGTTGAGCTGCCCATCCACACAACCTGGCTGGATGGCAT  
SRR1269693.1981773.1+ CGAGGAACAGGAGCTGATGAGGTTGAGCTGCCCATCCACACAACCTGGCTGGATGGCAT  
SRR1271617.15492594.1- CGAGGAACAGGAGCTGATGAGGTTGAGCTGCCCATCCACACAACCTGGCTGGATGGCAT  
SRR1271624.3358682.2- CGAGGAACAGGAGCTGATGAGGTTGAGCTGCCCATCCACACAACCTGGCTGGATGGCAT  
SRR1265424.7293.2+ GAGGAACAGGAGCTGATGAGGTTGAGCTGCCCATCCACACAACCTGGCTGGATGGCAT  
SRR1266948.19095128.2+ GAGGAACAGGAGCTGATGAGGTTGAGCTGCCCATCCACACAACCTGGCTGGATGGCAT  
SRR1266957.3666759.2- GAGGAACAGGAGCTGATGAGGTTGAGCTGCCCATCCACACAACCTGGCTGGATGGCAT  
SRR1269700.1764719.2- GAGGAACAGGAGCTGATGAGGTTGAGCTGCCCATCCACACAACCTGGCTGGATGGCAT  
SRR1271617.12164168.1+ GAGGAACAGGAGCTGATGAGGTTGAGCTGCCCATCCACACAACCTGGCTGGATGGCAT  
SRR1271621.2349329.1+ GAGGAACAGGAGCTGATGAGGTTGAGCTGCCCATCCACACAACCTGGCTGGATGGCAT  
SRR1271631.60122186.1+ GAGGAACAGGAGCTGATGAGGTTGAGCTGCCCATCCACACAACCTGGCTGGATGGCAT  
SRR1271631.75576578.1- GAGGAACAGGAGCTGATGAGGTTGAGCTGCCCATCCACACAACCTGGCTGGATGGCAT  
SRR1265107.9747432.1- AGGAACAGGAGCTGATGAGGTTGAGCTGCCCATCCACACAACCTGGCTGGATGGCAT  
SRR1265428.3438079.1+ AGGAACAGGAGCTGATGAGGTTGAGCTGCCCATCCACACAACCTGGCTGGATGGCAT  
SRR1265487.9618712.2+ AGGAACAGGAGCTGATGAGGTTGAGCTGCCCATCCACACAACCTGGCTGGATGGCAT  
SRR1266960.47540.2- AGGAACAGGAGCTGATGAGGTTGAGCTGCCCATCCACACAACCTGGCTGGATGGCAT  
SRR1271617.99985877.2+ AGGAACAGGAGCTGATGAGGTTGAGCTGCCCATCCACACAACCTGGCTGGATGGCAT  
SRR1265418.2535443.1+ GAACAGGAGCTGATGAGGTTGAGCTGCCCATCCACACAACCTGGCTGGATGGCAT  
SRR1265486.11495028.2+ GAACAGGAGCTGATGAGGTTGAGCTGCCCATCCACACAACCTGGCTGGATGGCAT  
SRR1269702.3793239.2- AACAGGAGCTGATGAGGTTGAGCTGCCCATCCACACAACCTGGCTGGATGGCAT  
SRR1271617.46820496.2- AACAGGAGCTGATGAGGTTGAGCTGCCCATCCACACAACCTGGCTGGATGGCAT  
SRR1271617.81204720.2+ AACAGGAGCTGATGAGGTTGAGCTGCCCATCCACACAACCTGGCTGGATGGCAT  
SRR1271640.16324249.2+ AACAGGAGCTGATGAGGTTGAGCTGCCCATCCACACAACCTGGCTGGATGGCAT  
SRR1271656.37410994.2- AACAGGAGCTGATGAGGTTGAGCTGCCCATCCACACAACCTGGCTGGATGGCAT  
SRR1265106.3654183.1+ CAGGAGCTGATGAGGTTGAGCTGCCCATCCACACAACCTGGCTGGATGGCAT  
SRR1265428.3817667.1+ CAGGAGCTGATGAGGTTGAGCTGCCCATCCACACAACCTGGCTGGATGGCAT  
SRR1265429.2745098.2+ AGGAGCTGATGAGGTTGAGCTGCCCATCCACACAACCTGGCTGGATGGCAT  
SRR1271639.6412786.2+ AGGAGCTGATGAGGTTGAGCTGCCCATCCACACAACCTGGCTGGATGGCAT  
SRR1271656.50764191.2+ AGGAGCTGATGAGGTTGAGCTGCCCATCCACACAACCTGGCTGGATGGCAT  
SRR1265421.1577740.1+ GGAGCTGATGAGGTTGAGCTGCCCATCCACACAACCTGGCTGGATGGCAT  
SRR1265959.4685497.1- GGAGCTGATGAGGTTGAGCTGCCCATCCACACAACCTGGCTGGATGGCAT  
SRR1266946.20413741.1+ GGAGCTGATGAGGTTGAGCTGCCCATCCACACAACCTGGCTGGATGGCAT  
SRR1266948.20676083.1- GGAGCTGATGAGGTTGAGCTGCCCATCCACACAACCTGGCTGGATGGCAT  
SRR1271611.58180054.2- GGAGCTGATGAGGTTGAGCTGCCCATCCACACAACCTGGCTGGATGGCAT  
SRR1269721.4085403.1- GAGCTGATGAGGTTGAGCTGCCCATCCACACAACCTGGCTGGATGGCAT  
SRR1271616.7303942.1- AGCTGATGAGGTTGAGCTGCCCATCCACACAACCTGGCTGGATGGCAT  
SRR1271617.43257682.2- AGCTGATGAGGTTGAGCTGCCCATCCACACAACCTGGCTGGATGGCAT  
SRR1266952.5487495.1+ GCTGATGAGGTTGAGCTGCCCATCCACACAACCTGGCTGGATGGCAT  
SRR1266964.9267740.1- GCTGATGAGGTTGAGCTGCCCATCCACACAACCTGGCTGGATGGCAT  
SRR1265962.10995514.2+ CTGATGAGGTTGAGCTGCCCATCCACACAACCTGGCTGGATGGCAT  
SRR1266948.1989161.1- CTGATGAGGTTGAGCTGCCCATCCACACAACCTGGCTGGATGGCAT  
SRR1269720.2054067.1+ CTGATGAGGTTGAGCTGCCCATCCACACAACCTGGCTGGATGGCAT





SRR1271631.31017128.2+  
 SRR1265487.11821367.1-  
 SRR1271637.3241382.1-  
 SRR1271636.12517782.1-  
 SRR1265429.1518485.2-  
 SRR1271619.1235877.2+  
 SRR1265425.5275455.1+  
 SRR1266953.243746.1+  
 SRR1271624.5552917.1-  
 SRR1269721.4648312.2-  
 SRR1271642.11184403.2-  
 SRR1271643.6252990.2-  
 SRR1265094.790368.1-  
 SRR1271611.53462766.1+  
 SRR1271626.23923475.1-  
 SRR1271638.1270149.1+  
 SRR1271665.3197988.2-  
 SRR1265091.3132398.2+  
 SRR1271626.33842030.2+  
 SRR1271639.3293122.2+  
 SRR1265959.5926745.2+  
 SRR1269721.8669041.2-  
 SRR1271622.14489347.1-  
 SRR1266949.13627167.1-  
 SRR1266964.3108962.2-  
 SRR1265430.10056360.1-  
 SRR1265488.8390944.1+  
 SRR1271617.20893667.1+  
 SRR1271631.16099619.2-  
 SRR1271631.75834610.2-  
 SRR1271636.7067284.2-  
 SRR1271637.7917479.1-  
 SRR1265118.3202418.1-  
 SRR1265419.9760671.1-  
 SRR1265959.8541929.1+  
 SRR1269724.3215048.1+  
 SRR1271660.19161575.1+  
 SRR1271661.7471914.2-  
 SRR1271631.51751938.1-  
 SRR1265429.13415617.1-  
 SRR1269694.7238249.2+  
 SRR1271631.56849156.2-  
 SRR1265959.14596287.1-  
 SRR1271626.5381257.1-  
 SRR1265960.10540450.2-  
 SRR1269727.6578407.2+  
 SRR1271611.50005129.1+  
 SRR1265103.1752770.1+  
 SRR1265101.3000620.1+  
 SRR1265420.8458569.2-  
 SRR1265962.10464106.2-  
 SRR1271628.74690.1-  
 SRR1265119.9232704.2+  
 SRR1265486.8872663.2+  
 SRR1266948.8806088.1-  
 SRR1269690.4935460.1+  
 SRR1271631.92695975.2+  
 SRR1265422.16304480.1-  
 SRR1271609.5981094.1+  
 SRR1271661.10105368.1+

ACACAAGTGGCTGGATGGCAT  
 CACAAGTGGCTGGATGGCAT  
 CACAAGTGGCTGGATGGCAT  
 ACAAGTGGCTGGATGGCAT  
 CAACTGGCTGGATGGCAT  
 CAACTGGCTGGATGGCAT  
 AACTGGCTGGATGGCAT  
 AACTGGCTGGATGGCAT  
 AACTGGCTGGATGGCAT  
 ACTGGCTGGATGGCAT  
 ACTGGCTGGATGGCAT  
 ACTGGCTGGATGGCAT  
 ACTGGCTGGATGGCAT  
 CTGGCTGGATGGCAT  
 CTGGCTGGATGGCAT  
 CTGGCTGGATGGCAT  
 CTGGCTGGATGGCAT  
 TGGCTGGATGGCAT  
 GGCTGGATGGCAT  
 GGCTGGATGGCAT  
 GCTGGATGGCAT  
 GCTGGATGGCAT  
 GCTGGATGGCAT  
 CTGGATGGCAT  
 CTGGATGGCAT  
 TGGATGGCAT  
 TGGATGGCAT  
 TGGATGGCAT  
 TGGATGGCAT  
 TGGATGGCAT  
 TGGATGGCAT  
 GGATGGCAT  
 GGATGGCAT  
 GGATGGCAT  
 GGATGGCAT  
 GGATGGCAT  
 GGATGGCAT  
 GATGGCAT  
 ATGGCAT  
 ATGGCAT  
 ATGGCAT  
 TGGCAT  
 TGGCAT  
 GGCAT  
 GGCAT  
 GGCAT  
 GCAT  
 CAT  
 CAT  
 CAT  
 CAT  
 AT  
 AT  
 AT  
 AT  
 AT  
 T  
 T  
 T

consensus

CACGAGGAACAGGAGCTGATGAGTTGAGCTGCACATCCACACAAGTGGCTGGATGGCAT

SRR1265118.8469183.1+  
 SRR1265427.10426011.1+  
 SRR1265430.3999536.2-  
 SRR1271656.18693034.2-  
 SRR1266959.6559141.2+  
 SRR1266962.3051106.2+  
 SRR1271623.14435698.2+  
 SRR1271625.4462362.2-  
 SRR1265090.573951.1+  
 SRR1265419.5834061.2-  
 SRR1266962.8268942.2-  
 SRR1269694.6400404.1+  
 SRR1269727.8758172.1+  
 SRR1271617.87539143.2+  
 SRR1271631.51412202.2-  
 SRR1265490.7565460.2+  
 SRR1271611.32939716.2+  
 SRR1271663.9467739.2+  
 SRR1265107.8184323.2+  
 SRR1271625.4672091.1-

C  
 C  
 C  
 C  
 CT  
 CT  
 CT  
 CT  
 CTG  
 CTG  
 CTG  
 CTG  
 CTG  
 CTG  
 CTG  
 CTG  
 CTGG  
 CTGG  
 CTGG  
 CTGG  
 CTGG  
 CTGG  
 CTGG

|                         |                              |
|-------------------------|------------------------------|
| SRR1271625.4974445.2-   | CTGGA                        |
| SRR1265490.12123742.2-  | CTGGAT                       |
| SRR1269725.9198123.1+   | CTGGAT                       |
| SRR1271666.9606214.1-   | CTGGAT                       |
| SRR1265108.11287257.2+  | CTGGATT                      |
| SRR1269723.12879211.1+  | CTGGATT                      |
| SRR1271611.35735582.1-  | CTGGATT                      |
| SRR1271611.45105264.1+  | CTGGATT                      |
| SRR1271637.7730229.2-   | CTGGATT                      |
| SRR1271605.19945219.1+  | CTGGATTC                     |
| SRR1271606.10370241.1+  | CTGGATTC                     |
| SRR1271618.8223150.2+   | CTGGATTC                     |
| SRR1271617.24478703.2+  | CTGGATTCA                    |
| SRR1271656.16215479.1-  | CTGGATTCA                    |
| SRR1271656.38998198.2-  | CTGGATTCA                    |
| SRR1265427.13084996.1+  | CTGGATTCA                    |
| SRR1266946.1503677.1-   | CTGGATTCA                    |
| SRR1271656.4976182.2+   | CTGGATTCAGC                  |
| SRR1265490.5635851.1+   | CTGGATTCAGCC                 |
| SRR1269724.1613007.2+   | CTGGATTCAGCC                 |
| SRR1271628.1578656.2-   | CTGGATTCAGCC                 |
| SRR1271631.73787149.2-  | CTGGATTCAGCC                 |
| SRR1271634.2225500.2-   | CTGGATTCAGCC                 |
| SRR1271660.7768350.2+   | CTGGATTCAGCC                 |
| SRR1265490.1647534.2+   | CTGGATTCAGCCC                |
| SRR1271617.29201909.1-  | CTGGATTCAGCCC                |
| SRR1271656.27642211.2-  | CTGGATTCAGCCC                |
| SRR1271617.18340985.1-  | CTGGATTCAGCCCT               |
| SRR1271643.6252990.1+   | CTGGATTCAGCCCT               |
| SRR1265486.4816291.2+   | CTGGATTCAGCCCTC              |
| SRR1266947.1797376.1+   | CTGGATTCAGCCCTC              |
| SRR1269693.657451.2-    | CTGGATTCAGCCCTC              |
| SRR1269724.7736550.2-   | CTGGATTCAGCCCTC              |
| SRR1269724.7878642.2-   | CTGGATTCAGCCCTC              |
| SRR1271625.4440646.1-   | CTGGATTCAGCCCTC              |
| SRR1271626.7870290.2+   | CTGGATTCAGCCCTC              |
| SRR1271663.9621731.2+   | CTGGATTCAGCCCTC              |
| SRR1265101.7863435.2+   | CTGGATTCAGCCCTCA             |
| SRR1265119.2075759.2+   | CTGGATTCAGCCCTCA             |
| SRR1271660.19489729.2-  | ATGGATTCAGCCCTCA             |
| SRR1265425.11836318.2+  | CTGGATTCAGCCCTCAT            |
| SRR1266959.12652072.2-  | CTGGATTCAGCCCTCAT            |
| SRR1271638.10108003.1-  | CTGGATTCAGCCCTCAT            |
| SRR1265107.9762562.1+   | CTGGATTCAGCCCTCATG           |
| SRR1266964.9683545.2+   | CTGGATTCAGCCCTCATGG          |
| SRR1271617.106361713.1- | CTGGATTCAGCCCTCATGG          |
| SRR1271631.38795764.1+  | CTGTATTCAGCCCTCATGG          |
| SRR1271637.8462724.1-   | CTGGATTCAGCCCTCATGG          |
| SRR1269724.2351101.2-   | CTGGATTCAGCCCTCATGGA         |
| SRR1265424.825035.1+    | CTGGATTCAGCCCTCATGGAG        |
| SRR1266962.10797533.1+  | CTGGATTCAGCCCTCATGGAG        |
| SRR1266962.933875.2-    | CTGGATTCAGCCCTCATGGAG        |
| SRR1269695.4605288.1-   | CTGGATTCAGCCCTCATGGAG        |
| SRR1269701.962293.1+    | CTGGATTCAGCCCTCATGGAG        |
| SRR1265094.9258610.2-   | CTGGATTCAGCCCTCATGGAGA       |
| SRR1266963.14618912.2+  | CTGGATTCAGCCCTCATGGAGA       |
| SRR1271627.2433963.2+   | CTGGATTCAGCCCTCATGGAGA       |
| SRR1265960.6641003.1-   | CTGGATTCAGCCCTCATGGAGAG      |
| SRR1266959.1925156.1+   | CTGGATTCAGCCCTCATGGAGAG      |
| SRR1269702.9206585.1-   | CTGGATTCAGCCCTCATGGAGAG      |
| SRR1271636.32970902.1-  | CTGGATTCAGCCCTCATGGAGAG      |
| SRR1265108.5336322.1+   | CTGGATTCAGCCCTCATGGAGAGC     |
| SRR1265485.927570.2+    | CTGGATTCAGCCCTCATGGAGAGC     |
| SRR1266948.20521025.2-  | CTGGATTCAGCCCTCATGGAGAGC     |
| SRR1269691.4799971.1+   | CTGGATTCAGCCCTCATGGAGAGC     |
| SRR1269722.8669002.1+   | CTGGATTCAGCCCTCATGGAGAGC     |
| SRR1265487.3611936.2-   | CTGGATTCAGCCCTCATGGAGAGCT    |
| SRR1265487.5948289.1+   | CTGGATTCAGCCCTCATGGAGAGCT    |
| SRR1271656.19755138.1+  | CTGGATTCAGCCCTCATGGAGAGCT    |
| SRR1265120.10380681.2+  | CTGGATTCAGCCCTCATGGAGAGCTG   |
| SRR1265430.9435022.1-   | CTGGATTCAGCCCTCATGGAGAGCTG   |
| SRR1269700.1764719.2-   | CTGGATTCAGCCCTCATGGAGAGCTG   |
| SRR1271637.9483811.1+   | CTGGATTCAGCCCTCATGGAGAGCTG   |
| SRR1265103.11024313.1+  | CTGGATTCAGCCCTCATGGAGAGCTGC  |
| SRR1269689.11150721.2+  | CTGGATTCAGCCCTCATGGAGAGCTGC  |
| SRR1269701.8482472.1+   | CTGGATTCAGCCCTCATGGAGAGCTGC  |
| SRR1269726.8967180.1-   | CTGGATTCAGCCCTCATGGAGAGCTGC  |
| SRR1266946.22292515.1-  | CTGGATTCAGCCCTCATGGAGAGCTGCC |
| SRR1266948.4974750.1+   | CTGGATTCAGCCCTCATGGAGAGCTGCC |
| SRR1265100.7029791.2-   | CTGGATTCAGCCCTCATGGAGAGCTGCC |
| SRR1266960.6111811.2-   | CTGGATTCAGCCCTCATGGAGAGCTGCC |
| SRR1266952.10100495.1-  | CTGGATTCAGCCCTCATGGAGAGCTGCC |
| SRR1265116.2215467.2+   | CTGGATTCAGCCCTCATGGAGAGCTGCC |
| SRR1265486.9625524.2+   | CTGGATTCAGCCCTCATGGAGAGCTGCC |

SRR1271626.39747880.2- CTGGATTCAGCCCTCATGGAGAGCTGCCTGG  
SRR1265424.14641649.2+ CTGGATTCAGCCCTCATGGAGAGCTGCCTGGA  
SRR1265100.6825972.2+ CTGGATTCAGCCCTCATGGAGAGCTGCCTGGAT  
SRR1265420.6477611.2+ CTGGATTCAGCCCTCATGGAGAGCTGCCTGGAT  
SRR1265486.2988089.2- CTGGATTCAGCCCTCATGGAGAGCTGCCTGGAT  
SRR1271641.1475015.2- CTGGATTCAGCCCTCATGGAGAGCTGCCTGGAT  
SRR1271643.11732587.1- CTGGATTCAGCCCTCATGGAGAGCTGCCTGGAT  
SRR1271656.19605949.2+ CTGGATTCAGCCCTCATGGAGAGCTGCCTGGAT  
SRR1265091.7293804.1- CTGGATTCAGCCCTCATGGAGAGCTGCCTGGATA  
SRR1265494.10552009.1+ CTGGATTCAGCCCTCATGGAGAGCTGCCTGGATA  
SRR1266951.1123610.1+ CTGGATTCAGCCCTCATGGAGAGCTGCCTGGATA  
SRR1269725.4823828.2+ CTGGATTCAGCCCTCATGGAGAGCTGCCTGGATA  
SRR1271617.7158444.2- CTGGATTCAGCCCTCATGGAGAGCTGCCTGGATA  
SRR1271626.27554490.1+ CTGGATTCAGCCCTCATGGAGAGCTGCCTGGATA  
SRR1271631.94542648.1+ CTGGATTCAGCCCTCATGGAGAGCTGCCTGGATA  
SRR1269689.1433856.2+ CTGGATTCAGCCCTCATGGAGAGCTGCCTGGATA  
SRR1269726.4838196.2- CTGGATTCAGCCCTCATGGAGAGCTGCCTGGATATG  
SRR1271605.3457147.2+ CTGGATTCAGCCCTCATGGAGAGCTGCCTGGATATGAC  
SRR1271614.7695441.1+ CTGGATTCAGCCCTCATGGAGAGCTGCCTGGATATGAC  
SRR1269689.9751428.2+ CTGGATTCAGCCCTCATGGAGAGCTGCCTGGATATGACA  
SRR1265103.9204126.1- CTGGATTCAGCCCTCATGGAGAGCTGCCTGGATATGACAT  
SRR1271626.39100757.2+ CTGGATTCAGCCCTCATGGAGAGCTGCCTGGATATGACAT  
SRR1266966.10206312.2+ CTGGATTCAGCCCTCATGGAGAGCTGCCTGGATATGACATT  
SRR1271617.46091166.2- CTGGATTCAGCCCTCATGGAGAGCTGCCTGGATATGACATT  
SRR1271626.2595264.2+ CTGGATTCAGCCCTCATGGAGAGCTGCCTGGATATGACATT  
SRR1271631.36011479.1+ CTGGATTCAGCCCTCATGGAGAGCTGCCTGGATATGACATT  
SRR1271638.17228052.2+ CTGGATTCAGCCCTCATGGAGAGCTGCCTGGATATGACATT  
SRR1265118.2132389.2+ CTGGATTCAGCCCTCATGGAGAGCTGCCTGGATATGACATTG  
SRR1269693.1981773.1+ CTGGATTCAGCCCTCATGGAGAGCTGCCTGGATATGACATTG  
SRR1271617.15492594.1- CTGGATTCAGCCCTCATGGAGAGCTGCCTGGATATGACATTG  
SRR1271624.3358682.2- CTGGATTCAGCCCTCATGGAGAGCTGCCTGGATATGACATTG  
SRR1265424.7293.2+ CTGGATTCAGCCCTCATGGAGAGCTGCCTGGATATGACATTGT  
SRR1266948.19095128.2+ CTGGATTCAGCCCTCATGGAGAGCTGCCTGGATATGACATTGT  
SRR1266957.3666759.2- CTGGATTCAGCCCTCATGGAGAGCTGCCTGGATATGACATTGT  
SRR1271617.12164168.1+ CTGGATTCAGCCCTCATGGAGAGCTGCCTGGATATGACATTGT  
SRR1271621.2349329.1+ CTGGATTCAGCCCTCATGGAGAGCTGCCTGGATATGACATTGT  
SRR1271631.60122186.1+ CTGGATTCAGCCCTCATGGAGAGCTGCCTGGATATGACATTGT  
SRR1271631.75576578.1- CTGGATTCAGCCCTCATGGAGAGCTGCCTGGATATGACATTGT  
SRR1265107.9747432.1- CTGGATTCAGCCCTCATGGAGAGCTGCCTGGATATGACATTGTG  
SRR1265428.3438079.1+ CTGGATTCAGCCCTCATGGAGAGCTGCCTGGATATGACATTGTG  
SRR1265487.9618712.2+ CTGGATTCAGCCCTCATGGAGAGCTGCCTGGATATGACATTGTG  
SRR1266960.47540.2- CTGGATTCAGCCCTCATGGAGAGCTGCCTGGATATGACATTGTG  
SRR1271617.99985877.2+ CTGGATTCAGCCCTCATGGAGAGCTGCCTGGATATGACATTGTG  
SRR1265418.2535443.1+ CTGGATTCAGCCCTCATGGAGAGCTGCCTGGATATGACATTGTGA  
SRR1265486.11495028.2+ CTGGATTCAGCCCTCATGGAGAGCTGCCTGGATATGACATTGTGAC  
SRR1269702.3793239.2- CTGGATTCAGCCCTCATGGAGAGCTGCCTGGATATGACATTGTGACA  
SRR1271617.46820496.2- CTGGATTCAGCCCTCATGGAGAGCTGCCTGGATATGACATTGTGACA  
SRR1271617.81204720.2+ CTGGATTCAGCCCTCATGGAGAGCTGCCTGGATATGACATTGTGACA  
SRR1271640.16324249.2+ CTGGATTCAGCCCTCATGGAGAGCTGCCTGGATATGACATTGTGACA  
SRR1271656.37410994.2- CTGGATTCAGCCCTCATGGAGAGCTGCCTGGATATGACATTGTGACA  
SRR1265106.3654183.1+ CTGGATTCAGCCCTCATGGAGAGCTGCCTGGATATGACATTGTGACAGG  
SRR1265428.3817667.1+ CTGGATTCAGCCCTCATGGAGAGCTGCCTGGATATGACATTGTGACAGG  
SRR1265429.2745098.2+ CTGGATTCAGCCCTCATGGAGAGCTGCCTGGATATGACATTGTGACAGGA  
SRR1271639.6412786.2+ CTGGATTCAGCCCTCATGGAGAGCTGCCTGGATATGACATTGTGACAGGA  
SRR1271656.50764191.2+ CTGGATTCAGCCCTCATGGAGAGCTGCCTGGATATGACATTGTGACAGGA  
SRR1265421.1577740.1+ CTGGATTCAGCCCTCATGGAGAGCTGCCTGGATATGACATTGTGACAGGAG  
SRR1265959.4685497.1- CTGGATTCAGCCCTCATGGAGAGCTGCCTGGATATGACATTGTGACAGGAG  
SRR1266946.20413741.1+ CTGGATTCAGCCCTCATGGAGAGCTGCCTGGATATGACATTGTGACAGGAG  
SRR1266948.20676083.1- CTGGATTCAGCCCTCATGGAGAGCTGCCTGGATATGACATTGTGACAGGAG  
SRR1271611.58180054.2- CTGGATTCAGCCCTCATGGAGAGCTGCCTGGATATGACATTGTGACAGGAG  
SRR1269721.4085403.1- CTGGATTCAGCCCTCATGGAGAGCTGCCTGGATATGACATTGTGACAGGAGG  
SRR1271616.7303942.1- CTGGATTCAGCCCTCATGGAGAGCTGCCTGGATATGACATTGTGACAGGAGGT  
SRR1271617.43257682.2- CTGGATTCAGCCCTCATGGAGAGCTGCCTGGATATGACATTGTGACAGGAGGT  
SRR1266952.5487495.1+ CTGGATTCAGCCCTCATGGAGAGCTGCCTGGATATGACATTGTGACAGGAGGTG  
SRR1266964.9267740.1- CTGGATTCAGCCCTCATGGAGAGCTGCCTGGATATGAAATTGTGACAGGAGGTG  
SRR1265962.10995514.2+ CTGGATTCAGCCCTCATGGAGAGCTGCCTGGATATGACATTGTGACAGGAGGTGC  
SRR1266948.1989161.1- CTGGATTCAGCCCTCATGGAGAGCTGCCTGGATATGACATTGTGACAGGAGGTGC  
SRR1269720.2054067.1+ CTGGATTCAGCCCTCATGGAGAGCTGCCTGGATATGACATTGTGACAGGAGGGGC  
SRR1271617.70351078.2- CTGGATTCAGCCCTCATGGAGAGCTGCCTGGATATGACATTGTGACAGGAGGTGC  
SRR1271637.17744220.1+ CTGGATTCAGCCCTCATGGAGAGCTGCCTGGATATGACATTGTGACAGGAGGTGC  
SRR1271637.17744220.2- CTGGATTCAGCCCTCATGGAGAGCTGCCTGGATATGACATTGTGACAGGAGGTGC  
SRR1265493.861628.2- CTGGATTCAGCCCTCATGGAGAGCTGCCTGGATATGACATTGTGACAGGAGGTGCC  
SRR1266956.10452827.2+ CTGGATTCAGCCCTCATGGAGAGCTGCCTGGATATGACATTGTGACAGGAGGGGCC  
SRR1269692.5660364.2+ CTGGATTCAGCCCTCATGGAGAGCTGCCTGGATATGACATTGTGACAGGAGGTGCC  
SRR1271606.11910612.2+ CTGGATTCAGCCCTCATGGAGAGCTGCCTGGATATGACATTGTGACAGGAGGTGCC  
SRR1271618.3593897.1+ CTGGATTCAGCCCTCATGGAGAGCTGCCTGGATATGACATTGTGACAGGAGGTGCC  
SRR1271631.70543548.2+ CTGGATTCAGCCCTCATGGAGAGCTGCCTGGATATGACATTGTGACAGGAGGTGCC  
SRR1271632.1398829.2+ CTGGATTCAGCCCTCATGGAGAGCTGCCTGGATATGACATTGTGACAGGAGGTGCC  
SRR1271640.643478.1+ CTGGATTCAGCCCTCATGGAGAGCTGCCTGGATATGACATTGTGACAGGAGGTGCC  
SRR1271644.8110496.1+ CTGGATTCAGCCCTCATGGAGAGCTGCCTGGATATGACATTGTGACAGGAGGTGCC  
SRR1271617.89166641.1+ CTGGATTCAGCCCTCATGGAGAGCTGCCTGGATATGACATTGTGACAGGAGGTGCC  
SRR1266956.8706797.2+ CTGGATTCAGCCCTCATGGAGAGCTGCCTGGATATGACATTGTGACAGGAGGTGCC  
SRR1265091.3132398.2+ CTGGATTCAGCCCTCATGGAGAGCTGCCTGGATATGACATTGTGACAGGAGGTGCC  
SRR1265094.790368.1- CTGGATTCAGCCCTCATGGAGAGCTGCCTGGATATGACATTGTGACAGGAGGTGCC

SRR1265101.3000620.1+ CTGGATTCAGCCCTCATGGAGAGCTGCCTGGATATGACATTGTGACAGGAGGTGCCTCCC  
SRR1265101.7450306.2- CTGGATTCAGCCCTCATGGAGAGCTGCCTGGATATGACATTGTGACAGGAGGTGCCTCCC  
SRR1265103.1752770.1+ CTGGATTCAGCCCTCATGGAGAGCTGCCTGGATATGACATTGTGACAGGAGGTGCCTCCC  
SRR1265103.985070.2- CTGGATTCAGCCCTCATGGAGAGCTGCCTGGATATGACATTGTGACAGGAGGTGCCTCCC  
SRR1265106.5466905.1+ CTGGATTCAGCCCTCATGGAGAGCTGCCTGGATATGACATTGTGACAGGAGGTGCCTCCC  
SRR1265107.10559184.2+ CTGGATTCAGCCCTCATGGAGAGCTGCCTGGATATGACATTGTGACAGGAGGTGCCTCCC  
SRR1265107.5946926.2- CTGGATTCAGCCCTCATGGAGAGCTGCCTGGATATGACATTGTGACAGGAGGTGCCTCCC  
SRR1265108.11035394.2- CTGGATTCAGCCCTCATGGAGAGCTGCCTGGATATGACATTGTGACAGGAGGTGCCTCCC  
SRR1265118.3202418.1- CTGGATTCAGCCCTCATGGAGAGCTGCCTGGATATGACATTGTGACAGGAGGTGCCTCCC  
SRR1265118.653206.1- CTGGATTCAGCCCTCATGGAGAGCTGCCTGGATATGACATTGTGACAGGAGGTGCCTCCC  
SRR1265120.8209771.2+ CTGGATTCAGCCCTCATGGAGAGCTGCCTGGATATGACATTGTGACAGGAGGTGCCTCCC  
SRR1265119.1351842.2+ CTGGATTCAGCCCTCATGGAGAGCTGCCTGGATATGACATTGTGACAGGAGGTGCCTCCC  
SRR1265119.9232704.2+ CTGGATTCAGCCCTCATGGAGAGCTGCCTGGATATGACATTGTGACAGGAGGTGCCTCCC  
SRR1265419.9630529.1- CTGGATTCAGCCCTCATGGAGAGCTGCCTGGATATGACATTGTGACAGGAGGTGCCTCCC  
SRR1265419.9760671.1- CTGGATTCAGCCCTCATGGAGAGCTGCCTGGATATGACATTGTGACAGGAGGTGCCTCCC  
SRR1265420.8209771.2- CTGGATTCAGCCCTCATGGAGAGCTGCCTGGATATGACATTGTGACAGGAGGTGCCTCCC  
SRR1265420.8458569.2- CTGGATTCAGCCCTCATGGAGAGCTGCCTGGATATGACATTGTGACAGGAGGTGCCTCCC  
SRR1265420.9704864.1- CTGGATTCAGCCCTCATGGAGAGCTGCCTGGATATGACATTGTGACAGGAGGTGCCTCCC  
SRR1265422.16304480.1- CTGGATTCAGCCCTCATGGAGAGCTGCCTGGATATGACATTGTGACAGGAGGTGCCTCCC  
SRR1265425.5275455.1+ CTGGATTCAGCCCTCATGGAGAGCTGCCTGGATATGACATTGTGACAGGAGGTGCCTCCC  
SRR1265427.1292820.1+ CTGGATTCAGCCCTCATGGAGAGCTGCCTGGATATGACATTGTGACAGGAGGTGCCTCCC  
SRR1265429.12762650.1+ CTGGATTCAGCCCTCATGGAGAGCTGCCTGGATATGACATTGTGACAGGAGGTGCCTCCC  
SRR1265429.13415617.1- CTGGATTCAGCCCTCATGGAGAGCTGCCTGGATATGACATTGTGACAGGAGGTGCCTCCC  
SRR1265429.1518485.2- CTGGATTCAGCCCTCATGGAGAGCTGCCTGGATATGACATTGTGACAGGAGGTGCCTCCC  
SRR1265429.617391.2+ CTGGATTCAGCCCTCATGGAGAGCTGCCTGGATATGACATTGTGACAGGAGGTGCCTCCC  
SRR1265430.10056360.1- CTGGATTCAGCCCTCATGGAGAGCTGCCTGGATATGACATTGTGACAGGAGGTGCCTCCC  
SRR1265430.11367129.2- CTGGATTCAGCCCTCATGGAGAGCTGCCTGGATATGACATTGTGACAGGAGGTGCCTCCC  
SRR1265430.2865913.1+ CTGGATTCAGCCCTCATGGAGAGCTGCCTGGATATGACATTGTGACAGGAGGTGCCTCCC  
SRR1265486.8872663.2+ CTGGATTCAGCCCTCATGGAGAGCTGCCTGGATATGACATTGTGACAGGAGGTGCCTCCC  
SRR1265487.11821367.1- CTGGATTCAGCCCTCATGGAGAGCTGCCTGGATATGACATTGTGACAGGAGGTGCCTCCC  
SRR1265488.2054623.2+ CTGGATTCAGCCCTCATGGAGAGCTGCCTGGATATGACATTGTGACAGGAGGTGCCTCCC  
SRR1265488.8390944.1+ CTGGATTCAGCCCTCATGGAGAGCTGCCTGGATATGACATTGTGACAGGAGGTGCCTCCC  
SRR1265494.8124625.1- CTGGATTCAGCCCTCATGGAGAGCTGCCTGGATATGACATTGTGACAGGAGGTGCCTCCC  
SRR1265959.14596287.1- CTGGATTCAGCCCTCATGGAGAGCTGCCTGGATATGACATTGTGACAGGAGGTGCCTCCC  
SRR1265959.5926745.2+ CTGGATTCAGCCCTCATGGAGAGCTGCCTGGATATGACATTGTGACAGGAGGTGCCTCCC  
SRR1265959.8541929.1+ CTGGATTCAGCCCTCATGGAGAGCTGCCTGGATATGACATTGTGACAGGAGGTGCCTCCC  
SRR1265960.10540450.2- CTGGATTCAGCCCTCATGGAGAGCTGCCTGGATATGACATTGTGACAGGAGGTGCCTCCC  
SRR1265961.17164072.1- CTGGATTCAGCCCTCATGGAGAGCTGCCTGGATATGACATTGTGACAGGAGGTGCCTCCC  
SRR1265961.21125338.2- CTGGATTCAGCCCTCATGGAGAGCTGCCTGGATATGACATTGTGACAGGAGGTGCCTCCC  
SRR1265962.10464106.2- CTGGATTCAGCCCTCATGGAGAGCTGCCTGGATATGACATTGTGACAGGAGGTGCCTCCC  
SRR1265962.6107415.1+ CTGGATTCAGCCCTCATGGAGAGCTGCCTGGATATGACATTGTGACAGGAGGTGCCTCCC  
SRR1265962.6217934.2- CTGGATTCAGCCCTCATGGAGAGCTGCCTGGATATGACATTGTGACAGGAGGTGCCTCCC  
SRR1266946.20535265.1+ CTGGATTCAGCCCTCATGGAGAGCTGCCTGGATATGACATTGTGACAGGAGGTGCCTCCC  
SRR1266948.8806088.1- CTGGATTCAGCCCTCATGGAGAGCTGCCTGGATATGACATTGTGACAGGAGGTGCCTCCC  
SRR1266949.13627167.1- CTGGATTCAGCCCTCATGGAGAGCTGCCTGGATATGACATTGTGACAGGAGGTGCCTCCC  
SRR1266949.6573322.2+ CTGGATTCAGCCCTCATGGAGAGCTGCCTGGATATGACATTGTGACAGGAGGTGCCTCCC  
SRR1266949.9294787.2- CTGGATTCAGCCCTCATGGAGAGCTGCCTGGATATGACATTGTGACAGGAGGTGCCTCCC  
SRR1266951.538073.1- CTGGATTCAGCCCTCATGGAGAGCTGCCTGGATATGACATTGTGACAGGAGGTGCCTCCC  
SRR1266953.243746.1+ CTGGATTCAGCCCTCATGGAGAGCTGCCTGGATATGACATTGTGACAGGAGGTGCCTCCC  
SRR1266956.11010848.2+ CTGGATTCAGCCCTCATGGAGAGCTGCCTGGATATGACATTGTGACAGGAGGTGCCTCCC  
SRR1266957.1389486.1- CTGGATTCAGCCCTCATGGAGAGCTGCCTGGATATGACATTGTGACAGGAGGTGCCTCCC  
SRR1266957.2266659.2+ CTGGATTCAGCCCTCATGGAGAGCTGCCTGGATATGACATTGTGACAGGAGGTGCCTCCC  
SRR1266958.5348149.1- CTGGATTCAGCCCTCATGGAGAGCTGCCTGGATATGACATTGTGACAGGAGGTGCCTCCC  
SRR1266964.3108962.2- CTGGATTCAGCCCTCATGGAGAGCTGCCTGGATATGACATTGTGACAGGAGGTGCCTCCC  
SRR1266964.3568258.1+ CTGGATTCAGCCCTCATGGAGAGCTGCCTGGATATGACATTGTGACAGGAGGTGCCTCCC  
SRR1266966.3487586.2- CTGAATTCAGCCCTCATGGAGAGCTGCCTGGATATGACATTGTGACAGGAGGTGCCTCCC  
SRR1269690.2081589.1- CTGGATTCAGCCCTCATGGAGAGCTGCCTGGATATGACATTGTGACAGGAGGTGCCTCCC  
SRR1269690.4935460.1+ CTGGATTCAGCCCTCATGGAGAGCTGCCTGGATATGACATTGTGACAGGAGGTGCCTCCC  
SRR1269691.6146778.1+ CTGGATTCAGCCCTCATGGAGAGCTGCCTGGATATGACATTGTGACAGGAGGTGCCTCCC  
SRR1269694.10059460.1+ CTGGATTCAGCCCTCATGGAGAGCTGCCTGGATATGACATTGTGACAGGAGGTGCCTCCC  
SRR1269694.7238249.2+ CTGGATTCAGCCCTCATGGAGAGCTGCCTGGATATGACATTGTGACAGGAGGTGCCTCCC  
SRR1269721.4648312.2- CTGGATTCAGCCCTCATGGAGAGCTGCCTGGATATGACATTGTGACAGGAGGTGCCTCCC  
SRR1269721.8669041.2- CTGGATTCAGCCCTCATGGAGAGCTGCCTGGATATGACATTGTGACAGGAGGTGCCTCCC  
SRR1269723.7352283.2+ CTGGATTCAGCCCTCATGGAGAGCTGCCTGGATATGACATTGTGACAGGAGGTGCCTCCC  
SRR1269723.7787279.1- CTGGATTCAGCCCTCATGGAGAGCTGCCTGGATATGACATTGTGACAGGAGGTGCCTCCC  
SRR1269724.3215048.1+ CTGGATTCAGCCCTCATGGAGAGCTGCCTGGATATGACATTGTGACAGGAGGTGCCTCCC  
SRR1269727.6578407.2+ CTGGATTCAGCCCTCATGGAGAGCTGCCTGGATATGACATTGTGACAGGAGGTGCCTCCC  
SRR1269727.8680671.1+ CTGGATTCAGCCCTCATGGAGAGCTGCCTGGATATGACATTGTGACAGGAGGTGCCTCCC  
SRR1271605.1607310.2+ CTGGATTCAGCCCTCATGGAGAGCTGCCTGGATATGACATTGTGACAGGAGGTGCCTCCC  
SRR1271605.4262505.1+ CTGGATTCAGCCCTCATGGAGAGCTGCCTGGATATGACATTGTGACAGGAGGTGCCTCCC  
SRR1271606.2596332.1- CTGGATTCAGCCCTCATGGAGAGCTGCCTGGATATGACATTGTGACAGGAGGTGCCTCCC  
SRR1271606.4403075.1+ CTGGATTCAGCCCTCATGGAGAGCTGCCTGGATATGACATTGTGACAGGAGGTGCCTCCC  
SRR1271609.5981094.1+ CTGGATTCAGCCCTCATGGAGAGCTGCCTGGATATGACATTGTGACAGGAGGTGCCTCCC  
SRR1271610.12892437.1+ CTGGATTCAGCCCTCATGGAGAGCTGCCTGGATATGACATTGTGACAGGAGGTGCCTCCC  
SRR1271611.50005129.1+ CTGGATTCAGCCCTCATGGAGAGCTGCCTGGATATGACATTGTGACAGGAGGTGCCTCCC  
SRR1271611.53462766.1+ CTGGATTCAGCCCTCATGGAGAGCTGCCTGGATATGACATTGTGACAGGAGGTGCCTCCC  
SRR1271611.8284106.2- CTGGATTCAGCCCTCATGGAGAGCTGCCTGGATATGACATTGTGACAGGAGGTGCCTCCC  
SRR1271616.2239278.1- CTGGATTCAGCCCTCATGGAGAGCTGCCTGGATATGACATTGTGACAGGAGGTGCCTCCC  
SRR1271617.20893667.1+ CTGGATTCAGCCCTCATGGAGAGCTGCCTGGATATGACATTGTGACAGGAGGTGCCTCCC  
SRR1271617.2641915.2- CTGGATTCAGCCCTCATGGAGAGCTGCCTGGATATGACATTGTGACAGGAGGTGCCTCCC  
SRR1271617.76678834.2- CTGGATTCAGCCCTCATGGAGAGCTGCCTGGATATGACATTGTGACAGGAGGTGCCTCCC  
SRR1271617.9057728.2- CTGGATTCAGCCCTCATGGAGAGCTGCCTGGATATGACATTGTGACAGGAGGTGCCTCCC  
SRR1271619.1235877.2+ CTGGATTCAGCCCTCATGGAGAGCTGCCTGGATATGACATTGTGACAGGAGGTGCCTCCC  
SRR1271622.14489347.1- CTGGATTCAGCCCTCATGGAGAGCTGCCTGGATATGACATTGTGACAGGAGGTGCCTCCC  
SRR1271624.5552917.1- CTGGATTCAGCCCTCATGGAGAGCTGCCTGGATATGACATTGTGACAGGAGGTGCCTCCC

SRR1271626.10299387.2- CTGGATTCAGCCCTCATGGAGAGCTGCCTGGATATGACATTGTGACAGGAGGTGCCTCCC  
SRR1271626.15519384.1- CTGGATTCAGCCCTCATGGAGAGCTGCCTGGATATGACATTGTGACAGGAGGTGCCTCCC  
SRR1271626.2251061.2+ CTGGATTCAGCCCTCATGGAGAGCTGCCTGGATATGACATTGTGACAGGAGGTGCCTCCC  
SRR1271626.23923475.1- CTGGATTCAGCCCTCATGGAGAGCTGCCTGGATATGACATTGTGACAGGAGGTGCCTCCC  
SRR1271626.33842030.2+ CTGGATTCAGCCCTCATGGAGAGCTGCCTGGATATGACATTGTGACAGGAGGTGCCTCCC  
SRR1271626.37697061.1+ CTGGATTCAGCCCTCATGGAGAGCTGCCTGGATATGACATTGTGACAGGAGGTGCCTCCC  
SRR1271626.37703222.1+ CTGGATTCAGCCCTCATGGAGAGCTGCCTGGATATGACATTGTGACAGGAGGTGCCTCCC  
SRR1271626.5381257.1- CTGGATTCAGCCCTCATGGAGAGCTGCCTGGATATGACATTGTGACAGGAGGTGCCTCCC  
SRR1271626.7548380.2+ CTGGATTCAGCCCTCATGGAGAGCTGCCTGGATATGACATTGTGACAGGAGGTGCCTCCC  
SRR1271628.74690.1- CTGGATTCAGCCCTCATGGAGAGCTGCCTGGATATGACATTGTGACAGGAGGTGCCTCCC  
SRR1271631.104145897.2- CTGGATTCAGCCCTCATGGAGAGCTGCCTGGATATGACATTGTGACAGGAGGTGCCTCCC  
SRR1271631.16099619.2- CTGGATTCAGCCCTCATGGAGAGCTGCCTGGATATGACATTGTGACAGGAGGTGCCTCCC  
SRR1271631.30275332.1+ CTGGATTCAGCCCTCATGGAGAGCTGCCTGGATATGACATTGTGACAGGAGGTGCCTCCC  
SRR1271631.31017128.2+ CTGGATTCAGCCCTCATGGAGAGCTGCCTGGATATGACATTGTGACAGGAGGTGCCTCCC  
SRR1271631.33921289.2+ CTGGATTCAGCCCTCATGGAGAGCTGCCTGGATATGACATTGTGACAGGAGGTGCCTCCC  
SRR1271631.37762412.1+ CTGGATTCAGCCCTCATGGAGAGCTGCCTGGATATGACATTGTGACAGGAGGTGCCTCCC  
SRR1271631.42268717.2+ CTGGATTCAGCCCTCATGGAGAGCTGCCTGGATATGACATTGTGACAGGAGGTGCCTCCC  
SRR1271631.51751938.1- CTGGATTCAGCCCTCATGGAGAGCTGCCTGGATATGACATTGTGACAGGAGGTGCCTCCC  
SRR1271631.56849156.2- CTGGATTCAGCCCTCATGGAGAGCTGCCTGGATATGACATTGTGACAGGAGGTGCCTCCC  
SRR1271631.75834610.2- CTGGATTCAGCCCTCATGGAGAGCTGCCTGGATATGACATTGTGACAGGAGGTGCCTCCC  
SRR1271631.78235890.1- CTGGATTCAGCCCTCATGGAGAGCTGCCTGGATATGACATTGTGACAGGAGGTGCCTCCC  
SRR1271631.88107554.2- CTGGATTCAGCCCTCATGGAGAGCTGCCTGGATATGACATTGTGACAGGAGGTGCCTCCC  
SRR1271631.92695975.2+ CTGGATTCAGCCCTCATGGAGAGCTGCCTGGATATGACATTGTGACAGGAGGTGCCTCCC  
SRR1271632.2107455.1+ CTGGATTCAGCCCTCATGGAGAGCTGCCTGGATATGACATTGTGACAGGAGGTGCCTCCC  
SRR1271636.10089274.2+ CTGGATTCAGCCCTCATGGAGAGCTGCCTGGATATGACATTGTGACAGGAGGTGCCTCCC  
SRR1271636.10973309.1- CTGGATTCAGCCCTCATGGAGAGCTGCCTGGATATGACATTGTGACAGGAGGTGCCTCCC  
SRR1271636.12517782.1- CTGGATTCAGCCCTCATGGAGAGCTGCCTGGATATGACATTGTGACAGGAGGTGCCTCCC  
SRR1271636.7067284.2- CTGGATTCAGCCCTCATGGAGAGCTGCCTGGATATGACATTGTGACAGGAGGTGCCTCCC  
SRR1271637.3241382.1- CTGGATTCAGCCCTCATGGAGAGCTGCCTGGATATGACATTGTGACAGGAGGTGCCTCCC  
SRR1271637.7917479.1- CTGGATTCAGCCCTCATGGAGAGCTGCCTGGATATGACATTGTGACAGGAGGTGCCTCCC  
SRR1271638.1270149.1+ CTGGATTCAGCCCTCATGGAGAGCTGCCTGGATATGACATTGTGACAGGAGGTGCCTCCC  
SRR1271639.15930769.1+ CTGGATTCAGCCCTCATGGAGAGCTGCCTGGATATGACATTGTGACAGGAGGTGCCTCCC  
SRR1271639.3293122.2+ CTGGATTCAGCCCTCATGGAGAGCTGCCTGGATATGACATTGTGACAGGAGGTGCCTCCC  
SRR1271640.16967275.2+ CTGGATTCAGCCCTCATGGAGAGCTGCCTGGATATGACATTGTGACAGGAGGTGCCTCCC  
SRR1271640.3344063.1+ CTGGATTCAGCCCTCATGGAGAGCTGCCTGGATATGACATTGTGACAGGAGGTGCCTCCC  
SRR1271642.11184403.2- CTGGATTCAGCCCTCATGGAGAGCTGCCTGGATATGACATTGTGACAGGAGGTGCCTCCC  
SRR1271643.6252990.2- CTGGATTCAGCCCTCATGGAGAGCTGCCTGGATATGACATTGTGACAGGAGGTGCCTCCC  
SRR1271643.6397.1+ CTGGATTCAGCCCTCATGGAGAGCTGCCTGGATATGACATTGTGACAGGAGGTGCCTCCC  
SRR1271644.5773655.2+ CTGGATTCAGCCCTCATGGAGAGCTGCCTGGATATGACATTGTGACAGGAGGTGCCTCCC  
SRR1271656.13812009.2- CTGGATTCAGCCCTCATGGAGAGCTGCCTGGATATGACATTGTGACAGGAGGTGCCTCCC  
SRR1271656.23576076.2+ CTGGATTCAGCCCTCATGGAGAGCTGCCTGGATATGACATTGTGACAGGAGGTGCCTCCC  
SRR1271660.19161575.1+ CTGGATTCAGCCCTCATGGAGAGCTGCCTGGATATGACATTGTGACAGGAGGTGCCTCCC  
SRR1271660.204492.2- CTGGATTCAGCCCTCATGGAGAGCTGCCTGGATATGACATTGTGACAGGAGGTGCCTCCC  
SRR1271661.10105368.1+ CTGGATTCAGCCCTCATGGAGAGCTGCCTGGATATGACATTGTGACAGGAGGTGCCTCCC  
SRR1271661.7471914.2- CTGGATTCAGCCCTCATGGAGAGCTGCCTGGATATGACATTGTGACAGGAGGTGCCTCCC  
SRR1271661.7818147.2- CTGGATTCAGCCCTCATGGAGAGCTGCCTGGATATGACATTGTGACAGGAGGTGCCTCCC  
SRR1271664.6779123.2- CTGGATTCAGCCCTCATGGAGAGCTGCCTGTATATGACATTGTGACAGGAGGTGCCTCCC  
SRR1271665.3197988.2- CTGGATTCAGCCCTCATGGAGAGCTGCCTGGATATGACATTGTGACAGGAGGTGCCTCCC  
SRR1271665.3828750.1+ CTGGATTCAGCCCTCATGGAGAGCTGCCTGGATATGACATTGTGACAGGAGGTGCCTCCC  
SRR1271666.15049755.2+ CTGGATTCAGCCCTCATGGAGAGCTGCCTGGATATGACATTGTGACAGGAGGTGCCTCCC  
SRR1271667.9388496.1+ CTGGATTCAGCCCTCATGGAGAGCTGCCTGGATATGACATTGTGACAGGAGGTGCCTCCC  
SRR1265100.3569680.1+ TGGATTCAGCCCTCATGGAGAGCTGCCTGGATATGACATTGTGACAGGAGGTGCCTCCC  
SRR1271620.12742265.2+ TGGATTCAGCCCTCATGGAGAGCTGCCTGGATATGACATTGTGACAGGAGGTGCCTCCC  
SRR1271642.9849776.1+ TGGATTCAGCCCTCATGGAGAGCTGCCTGGATATGACATTGTGACAGGAGGTGCCTCCC  
SRR1271665.16214124.2- TGGATTCAGCCCTCATGGAGAGCTGCCTGGATATGACATTGTGACAGGAGGTGCCTCCC  
SRR1269724.4223359.2+ GGATTCAGCCCTCATGGAGAGCTGCCTGGATATGACATTGTGACAGGAGGTGCCTCCC  
SRR1271617.37162146.1+ GGATTCAGCCCTCATGGAGAGCTGCCTGGATATGACATTGTGACAGGAGGTGCCTCCC  
SRR1271639.4756923.2+ GGATTCAGCCCTCATGGAGAGCTGCCTGGATATGACATTGTGACAGGAGGTGCCTCCC  
SRR1271643.10483940.1+ GGATTCAGCCCTCATGGAGAGCTGCCTGGATATGACATTGTGACAGGAGGTGCCTCCC  
SRR1271631.7995179.1- GATTCAGCCCTCATGGAGAGCTGCCTGGATATGACATTGTGACAGGAGGTGCCTCCC  
SRR1265423.4002997.2+ ATTCAGCCCTCATGGAGAGCTGCCTGGATATGACATTGTGACAGGAGGTGCCTCCC  
SRR1265427.10252303.1- ATTCAGCCCTCATGGAGAGCTGCCTGGATATGACATTGTGACAGGAGGTGCCTCCC  
SRR1266964.13711499.2+ ATTCAGCCCTCATGGAGAGCTGCCTGGATATGACATTGTGACAGGAGGTGCCTCCC  
SRR1269723.820781.1- ATTCAGCCCTCATGGAGAGCTGCCTGGATATGACATTGTGACAGGAGGTGCCTCCC  
SRR1269724.764340.1- ATTCAGCCCTCATGGAGAGCTGCCTGGATATGACATTGTGACAGGAGGTGCCTCCC  
SRR1271631.115122576.1+ ATTCAGCCCTCATGGAGAGCTGCCTGGATATGACATTGTGACAGGAGGTGCCTCCC  
SRR1271639.6929131.1+ ATTCAGCCCTCATGGAGAGCTGCCTGGATATGACATTGTGACAGGAGGTGCCTCCC  
SRR1271656.4106422.1+ TTCAGCCCTCATGGAGAGCTGCCTGGATATGACATTGTGACAGGAGGTGCCTCCC  
SRR1265962.9313085.1+ TCAGCCCTCATGGAGAGCTGCCTGGATATGACATTGTGACAGGAGGTGCCTCCC  
SRR1265419.10177100.1+ CAGCCCTCATGGAGAGCTGCCTGGATATGACATTGTGACAGGAGGTGCCTCCC  
SRR1265487.6650089.1+ CAGCCCTCATGGAGAGCTGCCTGGATATGACATTGTGACAGGAGGTGCCTCCC  
SRR1265492.6404320.1- CAGCCCTCATGGAGAGCTGCCTGGATATGACATTGTGACAGGAGGTGCCTCCC  
SRR1271614.9511385.2+ CAGCCCTCATGGAGAGCTGCCTGGATATGACATTGTGACAGGAGGTGCCTCCC  
SRR1271661.3541586.1- CAGCCCTCATGGAGAGCTGCCTGGATATGACATTGTGACAGGAGGTGCCTCCC  
SRR1265422.11220844.2+ AGCCCTCATGGAGAGCTGCCTGGATATGACATTGTGACAGGAGGTGCCTCCC  
SRR1269694.9908338.1- GCCTTCATGGAGAGCTGCCTGGATATGACATTGTGACAGGAGGTGCCTCCC  
SRR1271618.3593897.2- GCCCTCATGGAGAGCTGCCTGGATATGACATTGTGACAGGAGGTGCCTCCC  
SRR1271624.3306484.2- GCCCTCATGGAGAGCTGCCTGGATATGACATTGTGACAGGAGGTGCCTCCC  
SRR1265117.8111828.2- CCCTCATGGAGAGCTGCCTGGATATGACATTGTGACAGGAGGTGCCTCCC  
SRR1269689.1433856.1- CCCTCATGGAGAGCTGCCTGGATATGACATTGTGACAGGAGGTGCCTCCC  
SRR1269690.8024392.1- CCCTCATGGAGAGCTGCCTGGATATGACATTGTGACAGGAGGTGCCTCCC  
SRR1269695.4463182.2+ CCCTCATGGAGAGCTGCCTGGATATGACATTGTGACAGGAGGTGCCTCCC  
SRR1269700.383429.1- CCCTCATGGAGAGCTGCCTGGATATGACATTGTGACAGGAGGTGCCTCCC  
SRR1271611.16853764.1- CCCTCATGGAGAGCTGCCTGGATATGACATTGTGACAGGAGGTGCCTCCC







|                        |          |
|------------------------|----------|
| SRR1271617.6275825.1+  | TGCCTCCC |
| SRR1271639.12989136.1- | TGCCTCCC |
| SRR1265116.2981073.2+  | GCCTCCC  |
| SRR1265423.10735190.2+ | GCCTCCC  |
| SRR1265425.6471841.1+  | GCCTCCC  |
| SRR1265960.2099829.1+  | GCCTCCC  |
| SRR1269723.11892874.2- | GCCTCCC  |
| SRR1265107.6639546.1+  | CCTCCC   |
| SRR1269723.5270004.2+  | CCTCCC   |
| SRR1271617.35095789.1+ | CCTCCC   |
| SRR1271626.29048032.2- | CCTCCC   |
| SRR1271611.49933549.1+ | CTCCC    |
| SRR1271617.72688277.1+ | TCCC     |
| SRR1271620.10933616.2- | TCCC     |
| SRR1271630.6773779.2+  | TCCC     |
| SRR1269694.995920.2+   | CCC      |
| SRR1269723.12292891.2- | CCC      |
| SRR1266961.10701038.1+ | CC       |
| SRR1269691.6982732.1-  | CC       |
| SRR1271617.49734526.2- | CC       |
| SRR1271617.65566596.2+ | CC       |
| SRR1271631.53790917.1- | CC       |
| SRR1271656.42884483.1- | CC       |
| SRR1271664.9315059.1-  | CC       |
| SRR1266960.7618362.1-  | C        |

consensus

CTGGATTAGCCCTCATGGAGAGCTGCCTGGATATGACATTGTGACAGGAGGTGCCTCCC

|                        |                 |   |   |   |   |   |   |   |   |
|------------------------|-----------------|---|---|---|---|---|---|---|---|
|                        | :               | : | : | : | : | : | : | : | : |
| SRR1265494.8124625.1-  | C               |   |   |   |   |   |   |   |   |
| SRR1271636.10089274.2+ | C               |   |   |   |   |   |   |   |   |
| SRR1271643.6397.1+     | C               |   |   |   |   |   |   |   |   |
| SRR1265429.12762650.1+ | CA              |   |   |   |   |   |   |   |   |
| SRR1265488.2054623.2+  | CA              |   |   |   |   |   |   |   |   |
| SRR1265962.6107415.1+  | CA              |   |   |   |   |   |   |   |   |
| SRR1266949.6573322.2+  | CA              |   |   |   |   |   |   |   |   |
| SRR1266966.3487586.2-  | CA              |   |   |   |   |   |   |   |   |
| SRR1265106.5466905.1+  | CAAA            |   |   |   |   |   |   |   |   |
| SRR1265962.6217934.2-  | CAAA            |   |   |   |   |   |   |   |   |
| SRR1271656.23576076.2+ | CAAA            |   |   |   |   |   |   |   |   |
| SRR1265961.17164072.1- | CAAAT           |   |   |   |   |   |   |   |   |
| SRR1271626.7548380.2+  | CAAAT           |   |   |   |   |   |   |   |   |
| SRR1271631.42268717.2+ | CAAAT           |   |   |   |   |   |   |   |   |
| SRR1271644.5773655.2+  | CAAAT           |   |   |   |   |   |   |   |   |
| SRR1266957.2266659.2+  | CAAATG          |   |   |   |   |   |   |   |   |
| SRR1271606.2596332.1-  | CAAATG          |   |   |   |   |   |   |   |   |
| SRR1271616.2239278.1-  | CAAATG          |   |   |   |   |   |   |   |   |
| SRR1265429.617391.2+   | CAAATGG         |   |   |   |   |   |   |   |   |
| SRR1271617.2641915.2-  | CAAATGG         |   |   |   |   |   |   |   |   |
| SRR1271626.10299387.2- | CAAATGG         |   |   |   |   |   |   |   |   |
| SRR1265430.11367129.2- | CAAATGGC        |   |   |   |   |   |   |   |   |
| SRR1269691.6146778.1+  | CAAATGGC        |   |   |   |   |   |   |   |   |
| SRR1269723.7787279.1-  | CAAATGGC        |   |   |   |   |   |   |   |   |
| SRR1271631.37762412.1+ | CAAATGGC        |   |   |   |   |   |   |   |   |
| SRR1271656.13812009.2- | CAAATGGC        |   |   |   |   |   |   |   |   |
| SRR1271660.204492.2-   | CAAATGGC        |   |   |   |   |   |   |   |   |
| SRR1271661.7818147.2-  | CAAATGGC        |   |   |   |   |   |   |   |   |
| SRR1266956.11010848.2+ | CAAATGGCA       |   |   |   |   |   |   |   |   |
| SRR1269723.7352283.2+  | CAAATGGCA       |   |   |   |   |   |   |   |   |
| SRR1271606.4403075.1+  | CAAATGGCA       |   |   |   |   |   |   |   |   |
| SRR1271611.8284106.2-  | CAAATGGCA       |   |   |   |   |   |   |   |   |
| SRR1271626.15519384.1- | CAAATGGCA       |   |   |   |   |   |   |   |   |
| SRR1271631.30275332.1+ | CAAATGGCA       |   |   |   |   |   |   |   |   |
| SRR1271664.6779123.2-  | CAAATGGCA       |   |   |   |   |   |   |   |   |
| SRR1266946.20535265.1+ | CAAATGGCAG      |   |   |   |   |   |   |   |   |
| SRR1271605.4262505.1+  | CAAATGGCAG      |   |   |   |   |   |   |   |   |
| SRR1271631.33921289.2+ | CAAATGGCAG      |   |   |   |   |   |   |   |   |
| SRR1271665.3828750.1+  | CAAATGGCAG      |   |   |   |   |   |   |   |   |
| SRR1271666.15049755.2+ | CAAATGGCAG      |   |   |   |   |   |   |   |   |
| SRR1265420.8209771.2-  | CAAATGGCAGC     |   |   |   |   |   |   |   |   |
| SRR1265420.9704864.1-  | CAAATGGCAGC     |   |   |   |   |   |   |   |   |
| SRR1265430.2865913.1+  | CAAATGGCAGC     |   |   |   |   |   |   |   |   |
| SRR1265103.985070.2-   | CAAATGGCAGCA    |   |   |   |   |   |   |   |   |
| SRR1271610.12892437.1+ | CAAATGGCAGCA    |   |   |   |   |   |   |   |   |
| SRR1271626.2251061.2+  | CAAATGGCAGCA    |   |   |   |   |   |   |   |   |
| SRR1269690.2081589.1-  | CAAATGGCAGCAT   |   |   |   |   |   |   |   |   |
| SRR1265101.7450306.2-  | CAAATGGCAGCATC  |   |   |   |   |   |   |   |   |
| SRR1265427.1292820.1+  | CAAATGGCAGCATC  |   |   |   |   |   |   |   |   |
| SRR1271632.2107455.1+  | CAAATGGCAGCATC  |   |   |   |   |   |   |   |   |
| SRR1265118.653206.1-   | CAAATGGCAGCATCT |   |   |   |   |   |   |   |   |
| SRR1266957.1389486.1-  | CAAATGGCAGCATCT |   |   |   |   |   |   |   |   |
| SRR1266958.5348149.1-  | CAAATGGCAGCATCT |   |   |   |   |   |   |   |   |
| SRR1266964.3568258.1+  | CAAATGGCAGCATCT |   |   |   |   |   |   |   |   |
| SRR1271626.37697061.1+ | CAAATGGCAGCATCT |   |   |   |   |   |   |   |   |

SRR1271631.78235890.1- CAAATGGCAGCATCT  
SRR1271631.88107554.2- CAAATGGCAGCATCT  
SRR1271667.9388496.1+ CAAATGGCAGCATCT  
SRR1266949.9294787.2- CAAATGGCAGCATCTG  
SRR1271639.15930769.1+ CAAATGGCAGCATCTG  
SRR1271640.3344063.1+ CAAATGGCAGCATCTGA  
SRR1265119.1351842.2+ CAAATGGCAGCACCTGAT  
SRR1269694.10059460.1+ CAAATGGCAGCATCTGAT  
SRR1271636.10973309.1- CAAATGGCAGCATCTGAT  
SRR1265108.11035394.2- CAAATGGCAGCATCTGATT  
SRR1265961.21125338.2- CAAATGGCAGCATCTGATT  
SRR1271619.1235877.2+ CAAATGGCAGCATCTGATT  
SRR1271631.31017128.2+ CAAATGGCAGCATCTGATT  
SRR1265420.8458569.2- CAAATGGCAGCATTTGATT  
SRR1265429.1518485.2- CAAATGGCAGCATCTGATT  
SRR1265487.11821367.1- CAAATGGCAGCATCTGATT  
SRR1271637.3241382.1- CAAATGGCAGCATCTGATT  
SRR1271636.12517782.1- CAAATGGCAGCATCTGATT  
SRR1265425.5275455.1+ CAAATGGCAGCATCTGATTCTCT  
SRR1266953.243746.1+ CAAATGGCAGCATCTGATTCTCT  
SRR1271624.5552917.1- CAAATGGCAGCATCTGATTCTCT  
SRR1269721.4648312.2- CAAATGGCAGCATCTGATTCTCTg  
SRR1271642.11184403.2- CAAATGGCAGCATCTGATTCTCTg  
SRR1271643.6252990.2- CAAATGGCAGCATCTGATTCTCTg  
SRR1265094.790368.1- CAAATGGCAGCATCTGATTCTCTgt  
SRR1271611.53462766.1+ CAAATGGCAGCATCTGATTCTCTgt  
SRR1271626.23923475.1- CAAATGGCAGCATCTGATTCTCTgt  
SRR1271638.1270149.1+ CAAATGGCAGCATCTGATTCTCTgt  
SRR1271665.3197988.2- CAAATGGCAGCATCTGATTCTCTgt  
SRR1265091.3132398.2+ CAAATGGCAGCATCTGATTCTCTgta  
SRR1271626.33842030.2+ CAAATGGCAGCATCTGATTCTCTgtaa  
SRR1271639.3293122.2+ CAAATGGCAGCATCTGATTCTCTgtaa  
SRR1271661.7471914.2- CAAATGGCAGCATCTGATTCTCTgtaa  
SRR1265959.5926745.2+ CAAATGGCAGCATCTGATTCTCTgtaag  
SRR1265960.10540450.2- CAAATGGCAGCATCTGATTCTCTgtaag  
SRR1269721.8669041.2- CAAATGGCAGCATCTGATTCTCTgtaag  
SRR1271622.14489347.1- CAAATGGCAGCATCTGATTCTCTgtaag  
SRR1266949.13627167.1- CAAATGGCAGCATCTGATTCTCTgtaagt  
SRR1266964.3108962.2- CAAATGGCAGCATCTGATTCTCTgtaagt  
SRR1265430.10056360.1- CAAATGGCAGCATCTGATTCTCTgtaagtt  
SRR1265488.8390944.1+ CAAATGGCAGCATCTGATTCTCTgtaagtt  
SRR1269724.4223359.2+ CAAATGGCAGCATCTGATTCTCTgtaagtt  
SRR1271617.20893667.1+ CAAATGGCAGCATCTGATTCTCTgtaagtt  
SRR1271631.16099619.2- CAAATGGCAGCATCTGATTCTCTgtaagtt  
SRR1271631.75834610.2- CAAATGGCAGCATCTGATTCTCTgtaagtt  
SRR1271636.7067284.2- CAAATGGCAGCATCTGATTCTCTgtaagtt  
SRR1271637.7917479.1- CAAATGGCAGCATCTGATTCTCTgtaagtt  
SRR1265118.3202418.1- CAAATGGCAGCATCTGATTCTCTgtaagttg  
SRR1265419.9760671.1- CAAATGGCAGCATCTGATTCTCTgtaagttg  
SRR1265959.8541929.1+ CAAATGGCAGCATCTGATTCTCTgtaagttg  
SRR1269724.3215048.1+ CAAATGGCAGCATCTGATTCTCTgtaagttg  
SRR1271660.19161575.1+ CAAATGGCAGCATCTGATTCTCTgtaagttg  
SRR1269727.6578407.2+ CAAATGGCAGCATCTGATTCTCTgtaagttga  
SRR1271631.51751938.1- CAAATGGCAGCATCTGATTCTCTgtaagttga  
SRR1265429.13415617.1- CAAATGGCAGCATCTGATTCTCTgtaagttgaa  
SRR1269694.7238249.2+ CAAATGGCAGCATCTGATTCTCTgtaagttgaa  
SRR1271631.56849156.2- CAAATGGCAGCATCTGATTCTCTgtaagttgaa  
SRR1265959.14596287.1- CAAATGGCAGCATCTGATTCTCTgtaagttgaac  
SRR1271626.5381257.1- CAAATGGCAGCATCTGATTCTCTgtaagttgaac  
SRR1271611.50005129.1+ CAAATGGCAGCATCTGATTCTCTgtaagttgaaca  
SRR1265103.1752770.1+ CAAATGGCAGCATCTGATTCTCTgtaagttgaacag  
SRR1265962.10464106.2- CAAATGGCAGCATCTGATTCTCTgtaagttgaacag  
SRR1265101.3000620.1+ CAAATGGCAGCATCTGATTCTCTgtaagttgaacaga  
SRR1271628.74690.1- CAAATGGCAGCATCTGATTCTCTgtaagttgaacaga  
SRR1265119.9232704.2+ CAAATGGCAGCATCTGATTCTCTgtaagttgaacagat  
SRR1265486.8872663.2+ CAAATGGCAGCATCTGATTCTCTgtaagttgaacagat  
SRR1266948.8806088.1- CAAATGGCAGCATCTGATTCTCTgtaagttgaacagat  
SRR1269690.4935460.1+ CAAATGGCAGCATCTGATTCTCTgtaagttgaacagat  
SRR1271631.92695975.2+ CAAATGGCAGCATCTGATTCTCTgtaagttgaacagat  
SRR1265422.16304480.1- CAAATGGCAGCATCTGATTCTCTgtaagttgaacagatt  
SRR1271609.5981094.1+ CAAATGGCAGCATCTGATTCTCTgtaagttgaacagatt  
SRR1271661.10105368.1+ CAAATGGCAGCATCTGATTCTCTgtaagttgaacagattt  
SRR1265107.5946926.2- CAAATGGCAGCATCTGATTCTCTgtaagttgaacagattt  
SRR1265419.9630529.1- CAAATGGCAGCATCTGATTCTCTgtaagttgaacagattt  
SRR1266951.538073.1- CAAATGGCAGCATCTGATTCTCTgtaagttgaacagattt  
SRR1271605.1607310.2+ CAAATGGCAGCATCTGATTCTCTgtaagttgaacagattt  
SRR1271617.9057728.2- CAAATGGCAGCATCTGATTCTCTgtaagttgaacagattt  
SRR1271626.37703222.1+ CAAATGGCAGCATCTGATTCTCTgtaagttgaacagattt  
SRR1271631.104145897.2- CAAATGGCAGCATCTGATTCTCTgtaagttgaacagattt  
SRR1271639.4756923.2+ CAAATGGCAGCATCTGATTCTCTgtaagttgaacagattt  
SRR1271640.16967275.2+ CAAATGGCAGCATCTGATTCTCTgtaagttgaacagattt  
SRR1265100.3569680.1+ CAAATGGCAGCATCTGATTCTCTgtaagttgaacagatttc  
SRR1271620.12742265.2+ CAAATGGCAGCATCTGATTCTCTgtaagttgaacagatttc  
SRR1271642.9849776.1+ CAAATGGCAGCATCTGATTCTCTgtaagttgaacagatttc

SRR1271665.16214124.2- CAAATGGCAGCATCTGATTCTCTgtaagttgaacagatttc  
SRR1271617.37162146.1+ CAAATGGCAGCATCTGATTCTCTgtaagttgaacagatttcc  
SRR1271643.10483940.1+ CAAATGGCAGCATCTGATTCTCTgtaagttgaacagatttcc  
SRR1271631.7995179.1- CAAATGGCAGCATCTGATTCTCTgtaagttgaacagatttcc  
SRR1265423.4002997.2+ CAAATGGCAGCATCTGATTCTCTgtaagttgaacagatttcc  
SRR1265427.10252303.1- CAAATGGCAGCATCTGATTCTCTgtaagttgaacagatttcc  
SRR1266964.13711499.2+ CAAATGGCAGCATCTGATTCTCTgtaagttgaacagatttcc  
SRR1269723.820781.1- CAAATGGCAGCATCTGATTCTCTgtaagttgaacagatttcc  
SRR1269724.764340.1- CAAATGGCAGCATCTGATTCTCTgtaagttgaacagatttcc  
SRR1271631.115122576.1+ CAAATGGCAGCATCTGATTCTCTgtaagttgaacagatttcc  
SRR1271639.6929131.1+ CAAATGGCAGCATCTGATTCTCTgtaagttgaacagatttcc  
SRR1271656.4106422.1+ CAAATGGCAGCATCTGATTCTCTgtaagttgaacagatttcc  
SRR1265962.9313085.1+ CAAATGGCAGCATCTGATTCTCTgtaagttgaacagatttcc  
SRR1265419.10177100.1+ CAAATGGCAGCATCTGATTCTCTgtaagttgaacagatttcc  
SRR1265487.6650089.1+ CAAATGGCAGCATCTGATTCTCTgtaagttgaacagatttcc  
SRR1265492.6404320.1- CAAATGGCAGCATCTGATTCTCTgtaagttgaacagatttcc  
SRR1271614.9511385.2+ CAAATGGCAGCATCTGATTCTCTgtaagttgaacagatttcc  
SRR1271661.3541586.1- CAAATGGCAGCATCTGATTCTCTgtaagttgaacagatttcc  
SRR1265422.11220844.2+ CAAATGGCAGCATCTGATTCTCTgtaagttgaacagatttcc  
SRR1269694.9908338.1+ CAAATGGCAGCATCTGATTCTCTgtaagttgaacagatttcc  
SRR1271618.3593897.2- CAAATGGCAGCATCTGATTCTCTgtaagttgaacagatttcc  
SRR1271624.3306484.2- CAAATGGCAGCATCTGATTCTCTgtaagttgaacagatttcc  
SRR1271627.8664492.2+ CAAATGGCAGCATCTGATTCTCTgtaagttgaacagatttcc  
SRR1265117.8111828.2- CAAATGGCAGCATCTGATTCTCTgtaagttgaacagatttcc  
SRR1269689.1433856.1- CAAATGGCAGCATCTGATTCTCTgtaagttgaacagatttcc  
SRR1269690.8024392.1- CAAATGGCAGCATCTGATTCTCTgtaagttgaacagatttcc  
SRR1269695.4463182.2+ CAAATGGCAGCATCTGATTCTCTgtaagttgaacagatttcc  
SRR1269700.383429.1- CAAATGGCAGCATCTGATTCTCTgtaagttgaacagatttcc  
SRR1271611.16853764.1- CAAATGGCAGCATCTGATTCTCTgtaagttgaacagatttcc  
SRR1271617.50700751.1+ CAAATGGCAGCATCTGATTCTCTgtaagttgaacagatttcc  
SRR1271631.43237953.1+ CAAATGGCAGCATCTGATTCTCTgtaagttgaacagatttcc  
SRR1271660.15638503.2- CAAATGGCAGCATCTGATTCTCTgtaagttgaacagatttcc  
SRR1265486.13491181.2+ CAAATGGCAGCATCTGATTCTCTgtaagttgaacagatttcc  
SRR1269691.1086423.2- CAAATGGCAGCATCTGATTCTCTgtaagttgaacagatttcc  
SRR1269696.5605733.2- CAAATGGCAGCATCTGATTCTCTgtaagttgaacagatttcc  
SRR1271606.5702810.2+ CAAATGGCAGCATCTGATTCTCTgtaagttgaacagatttcc  
SRR1271617.65162719.2- CAAATGGCAGCATCTGATTCTCTgtaagttgaacagatttcc  
SRR1271640.12546842.1+ CAAATGGCAGCATCTGATTCTCTgtaagttgaacagatttcc  
SRR1265961.2477855.2- AAAATGGCAGCATCTGTTCTCTgtaagttgaaccgatttcc  
SRR1266947.12390140.1+ CAAATGGCAGCATCTGATTCTCTgtaagttgaacagatttcc  
SRR1271611.139187.1+ CAAATGGCAGCATCTGATTCTCTgtaagttgaacagatttcc  
SRR1265119.703716.2+ CAAATGGCAGCATCTGATTCTCTgtaagttgaacagatttcc  
SRR1269689.3378410.1+ CAAATGGCAGCATCTGATTCTCTgtaagttgaacagatttcc  
SRR1269724.4049028.1+ CAAATGGCAGCATCTGATTCTCTgtaagttgaacagatttcc  
SRR1271664.2243521.1- CAAATGGCAGCATCTGATTCTCTgtaagttgaacagatttcc  
SRR1265092.2522035.2+ CAAATGGCAGCATCTGATTCTCTgtaagttgaacagatttcc  
SRR1265427.6605459.2- CAAATGGCAGCATCTGATTCTCTgtaagttgaacagatttcc  
SRR1265488.15177506.2+ CAAATGGCAGCATCTGATTCTCTgtaagttgaacagatttcc  
SRR1271609.12516496.1+ CAAATGGCAGCATCTGATTCTCTgtaagttgaacagatttcc  
SRR1271622.11118149.2+ CAAATGGCAGCATCTGATTCTCTgtaagttgaacagatttcc  
SRR1271638.17228052.1- CAAATGGCAGCATCTGATTCTCTgtaagttgaacagatttcc  
SRR1265102.10463059.1+ CAAATGGCAGCATCTGATTCTCTgtaagttgaacagatttcc  
SRR1265961.17342409.1- CAAATGGCAGCATCTGATTCTCTgtaagttgaacagatttcc  
SRR1271605.649185.2- CAAATGGCAGCATCTGATTCTCTgtaagttgaacagatttcc  
SRR1271610.20241530.2+ CAAATGGCAGCATCTGATTCTCTgtaagttgaacagatttcc  
SRR1271626.19553110.1+ CAAATGGCAGCATCTGATTCTCTgtaagttgaacagatttcc  
SRR1271660.7892962.2+ CAAATGGCAGCATCTGATTCTCTgtaagttgaacagatttcc  
SRR1266955.131900.1- CAAATGGCAGCATCTGATTCTCTgtaagttgaacagatttcc  
SRR1271610.8517146.1+ CAAATGGCAGCATCTGATTCTCTgtaagttgaacagatttcc  
SRR1271611.48572042.1+ CAAATGGCAGCATCTGATTCTCTgtaagttgaacagatttcc  
SRR1271622.14382387.2- CAAATGGCAGCATCTGATTCTCTgtaagttgaacagatttcc  
SRR1271631.58668872.1+ CAAATGGCAGCATCTGATTCTCTgtaagttgaacagatttcc  
SRR1271619.5245116.2- CAAATGGCAGCATCTGATTCTCTgtaagttgaacagatttcc  
SRR1271637.2965041.1+ CAAATGGCAGCATCTGATTCTCTgtaagttgaacagatttcc  
SRR1271638.5730963.1+ CAAATGGCAGCATCTGATTCTCTgtaagttgaacagatttcc  
SRR1265090.4559545.1+ CAAATGGCAGCATCTGATTCTCTgtaagttgaacagatttcc  
SRR1265090.6109847.1+ CAAATGGCAGCATCTGATTCTCTgtaagttgaacagatttcc  
SRR1265090.6845871.2- CAAATGGCAGCATCTGATTCTCTgtaagttgaacagatttcc  
SRR1265094.4259059.1- CAAATGGCAGCATCTGATTCTCTgtaagttgaacagatttcc  
SRR1265100.3569680.2- CAAATGGCAGCATCTGATTCTCTgtaagttgaacagatttcc  
SRR1265102.11716845.2- CAAATGGCAGCATCTGATTCTCTgtaagttgaacagatttcc  
SRR1265103.11096904.2- CAAATGGCAGCATCTGATTCTCTgtaagttgaacagatttcc  
SRR1265103.225186.1+ CAAATGGCAGCATCTGATTCTCTgtaagttgaacagatttcc  
SRR1265106.6015462.1- CAAATGGCAGCATCTGATTCTCTgtaagttgaacagatttcc  
SRR1265107.6639546.1+ CAAATGGCAGCATCTGATTCTCTgtaagttgaacagatttcc  
SRR1265116.2981073.2+ CAAATGGCAGCATCTGATTCTCTgtaagttgaacagatttcc  
SRR1265116.4878633.2- CAAATGGCAGCATCTGATTCTCTgtaagttgaacagatttcc  
SRR1265120.12719577.2- CAAATGGCAGCATCTGATTCTCTgtaagttgaacagatttcc  
SRR1265120.5268240.1- CAAATGGCAGCATCTGATTCTCTgtaagttgaacagatttcc  
SRR1265421.10386528.1- CAAATGGCAGCATCTGATTCTCTgtaagttgaacagatttcc  
SRR1265421.22002067.2- CAAATGGCAGCATCTGATTCTCTgtaagttgaacagatttcc  
SRR1265421.25226457.1- CAAATGGCAGCATCTGATTCTCTgtaagttgaacagatttcc  
SRR1265423.10735190.2+ CAAATGGCAGCATCTGATTCTCTgtaagttgaacagatttcc  
SRR1265423.1464723.2- CAAATGGCAGCATCTGATTCTCTgtaagttgaacagatttcc

SRR1265423.1668798.1+ CAAATGGCAGCATCTGATTCTCTgtaagttgaacagatttctcttcatcccccttggc  
SRR1265424.7293.1- CAAATGGCAGCATCTGATTCTCTgtaagttgaacagatttctcttcatcccccttggc  
SRR1265425.6471841.1+ CAAATGGCAGCATCTGATTCTCTgtaagttgaacagatttctcttcatcccccttggc  
SRR1265429.2745098.1- CAAATGGCAGCATCTGATTCTCTgtaagttgaacagatttctcttcatcccccttggc  
SRR1265485.10372300.2- CAAATGGCAGCATCTGATTCTCTgtaagttgaacagatttctcttcatcccccttggc  
SRR1265485.15551348.1+ CAAATGGCAGCATCTGATTCTCTgtaagttgaacagatttctcttcatcccccttggc  
SRR1265485.16445595.1+ CAAATGGCAGCATCTGATTCTCTgtaagttgaacagatttctcttcatcccccttggc  
SRR1265487.5948289.2- CAAATGGCAGCATCTGATTCTCTgtaagttgaacagatttctcttcatcccccttggc  
SRR1265488.8390944.2- CAAATGGCAGCATCTGATTCTCTgtaagttgaacagatttctcttcatcccccttggc  
SRR1265492.5585323.2- CAAATGGCAGCATCTGATTCTCTgtaagttgaacagatttctcttcatcccccttggc  
SRR1265492.5869691.1+ CAAATGGCAGCATCTGATTCTCTgtaagttgaacagatttctcttcatcccccttggc  
SRR1265494.7123982.2+ CAAATGGCAGCATCTGATTCTCTgtaagttgaacagatttctcttcatcccccttggc  
SRR1265959.13979314.2+ CAAATGGCAGCATCTGATTCTCTgtaagttgaacagatttctcttcatcccccttggc  
SRR1265959.5289237.1- CAAATGGCAGCATCTGATTCTCTgtaagttgaacagatttctcttcatcccccttggc  
SRR1265960.14555341.1- CAAATGGCAGCATCTGATTCTCTgtaagttgaacagatttctcttcatcccccttggc  
SRR1265960.2099829.1+ CAAATGGCAGCATCTGATTCTCTgtaagttgaacagatttctcttcatcccccttggc  
SRR1265962.8694253.2+ CAAATGGCAGCATCTGATTCTCTgtaagttgaacagatttctcttcatcccccttggc  
SRR1266946.10714685.1+ CAAATGGCAGCATCTGATTCTCTgtaagttgaacagatttctcttcatcccccttggc  
SRR1266947.19802501.1- CAAATGGCAGCATCTGATTCTCTgtaagttgaacagatttctcttcatcccccttggc  
SRR1266947.868250.1- CAAATGGCAGCATCTGATTCTCTgtaagttgaacagatttctcttcatcccccttggc  
SRR1266948.14467911.2- CAAATGGCAGCATCTGATTCTCTgtaagttgaacagatttctcttcatcccccttggc  
SRR1266949.6049032.2+ CAAATGGCAGCATCTGATTCTCTgtaagttgaacagatttctcttcatcccccttggc  
SRR1266952.1314922.2+ CAAATGGCAGCATCTGATTCTCTgtaagttgaacagatttctcttcatcccccttggc  
SRR1266952.14069486.1- CAAATGGCAGCATCTGATTCTCTgtaagttgaacagatttctcttcatcccccttggc  
SRR1266956.2653211.2- CAAATGGCAGCATCTGATTCTCTgtaagttgaacagatttctcttcatcccccttggc  
SRR1266957.11077584.1- CAAATGGCAGCATCTGATTCTCTgtaagttgaacagatttctcttcatcccccttggc  
SRR1266957.2266659.1- CAAATGGCAGCATCTGATTCTCTgtaagttgaacagatttctcttcatcccccttggc  
SRR1266959.5837465.1- CAAATGGCAGCATCTGATTCTCTgtaagttgaacagatttctcttcatcccccttggc  
SRR1266960.4486561.1+ CAAATGGCAGCATCTGATTCTCTgtaagttgaacagatttctcttcatcccccttggc  
SRR1266960.7618362.1- CAAATGGCAGCATCTGATTCTCTgtaagttgaacagatttctcttcatcccccttggc  
SRR1266961.10701038.1+ CAAATGGCAGCATCTGATTCTCTgtaagttgaacagatttctcttcatcccccttggc  
SRR1266962.4122587.2- CAAATGGCAGCATCTGATTCTCTgtaagttgaacagatttctcttcatcccccttggc  
SRR1266962.7560910.1+ CAAATGGCAGCATCTGATTCTCTgtaagttgaacagatttctcttcatcccccttggc  
SRR1266963.7668173.2- CAAATGGCAGCATCTGATTCTCTgtaagttgaacagatttctcttcatcccccttggc  
SRR1266964.10482596.2+ CAAATGGCAGCATCTGATTCTCTgtaagttgaacagatttctcttcatcccccttggc  
SRR1266964.11823893.2+ CAAATGGCAGCATCTGATTCTCTgtaagttgaacagatttctcttcatcccccttggc  
SRR1266966.10206312.1- CAAATGGCAGCATCTGATTCTCTgtaagttgaacagatttctcttcatcccccttggc  
SRR1266966.2152787.1+ CAAATGGCAGCATCTGATTCTCTgtaagttgaacagatttctcttcatcccccttggc  
SRR1269689.257048.1+ CAAATGGCAGCATCTGATTCTCTgtaagttgaacagatttctcttcatcccccttggc  
SRR1269689.6495585.2+ CAAATGGCAGCATCTGATTCTCTgtaagttgaacagatttctcttcatcccccttggc  
SRR1269690.5971251.1+ CAAATGGCAGCATCTGATTCTCTgtaagttgaacagatttctcttcatcccccttggc  
SRR1269690.6866648.1- CAAATGGCAGCATCTGATTCTCTgtaagttgaacagatttctcttcatcccccttggc  
SRR1269691.5900866.1- CAAATGGCAGCATCTGATTCTCTgtaagttgaacagatttctcttcatcccccttggc  
SRR1269691.6982732.1- CAAATGGCAGCATCTGATTCTCTgtaagttgaacagatttctcttcatcccccttggc  
SRR1269692.7437558.2+ CAAATGGCAGCATCTGATTCTCTgtaagttgaacagatttctcttcatcccccttggc  
SRR1269693.3627362.1+ CAAATGGCAGCATCTGATTCTCTgtaagttgaacagatttctcttcatcccccttggc  
SRR1269694.995920.2+ CAAATGGCAGCATCTGATTCTCTgtaagttgaacagatttctcttcatcccccttggc  
SRR1269699.6395347.1+ CAAATGGCAGCATCTGATTCTCTgtaagttgaacagatttctcttcatcccccttggc  
SRR1269699.8216561.2+ CAAATGGCAGCATCTGATTCTCTgtaagttgaacagatttctcttcatcccccttggc  
SRR1269700.4999243.2+ CAAATGGCAGCATCTGATTCTCTgtaagttgaacagatttctcttcatcccccttggc  
SRR1269700.8196703.2+ CAAATGGCAGCATCTGATTCTCTgtaagttgaacagatttctcttcatcccccttggc  
SRR1269700.9312299.2+ CAAATGGCAGCATCTGATTCTCTgtaagttgaacagatttctcttcatcccccttggc  
SRR1269703.1602551.2+ CAAATGGCAGCATCTGATTCTCTgtaagttgaacagatttctcttcatcccccttggc  
SRR1269703.1669213.1+ CAAATGGCAGCATCTGATTCTCTgtaagttgaacagatttctcttcatcccccttggc  
SRR1269703.7122945.1+ CAAATGGCAGCATCTGATTCTCTgtaagttgaacagatttctcttcatcccccttggc  
SRR1269720.6697396.1- CAAATGGCAGCATCTGATTCTCTgtaagttgaacagatttctcttcatcccccttggc  
SRR1269721.10925497.1+ CAAATGGCAGCATCTGATTCTCTgtaagttgaacagatttctcttcatcccccttggc  
SRR1269722.11583054.1+ CAAATGGCAGCATCTGATTCTCTgtaagttgaacagatttctcttcatcccccttggc  
SRR1269722.612784.2- CAAATGGCAGCATCTGATTCTCTgtaagttgaacagatttctcttcatcccccttggc  
SRR1269722.6911698.1+ CAAATGGCAGCATCTGATTCTCTgtaagttgaacagatttctcttcatcccccttggc  
SRR1269722.7488875.1+ CAAATGGCAGCATCTGATTCTCTgtaagttgaacagatttctcttcatcccccttggc  
SRR1269723.1055715.2+ CAAATGGCAGCATCTGATTCTCTgtaagttgaacagatttctcttcatcccccttggc  
SRR1269723.11892874.2- CAAATGGCAGCATCTGATTCTCTgtaagttgaacagatttctcttcatcccccttggc  
SRR1269723.12292891.2- CAAATGGCAGCATCTGATTCTCTgtaagttgaacagatttctcttcatcccccttggc  
SRR1269723.5270004.2+ CAAATGGCAGCATCTGATTCTCTgtaagttgaacagatttctcttcatcccccttggc  
SRR1269725.3442595.2+ CAAATGGCAGCATCTGATTCTCTgtaagttgaacagatttctcttcatcccccttggc  
SRR1269725.4246389.1+ CAAATGGCAGCATCTGATTCTCTgtaagttgaacagatttctcttcatcccccttggc  
SRR1269727.2683943.1- CAAATGGCAGCATCTGATTCTCTgtaagttgaacagatttctcttcatcccccttggc  
SRR1269727.8907245.1- CAAATGGCAGCATCTGATTCTCTgtaagttgaacagatttctcttcatcccccttggc  
SRR1271606.11910612.1- CAAATGGCAGCATCTGATTCTCTgtaagttgaacagatttctcttcatcccccttggc  
SRR1271606.5849136.1- CAAATGGCAGCATCTGATTCTCTgtaagttgaacagatttctcttcatcccccttggc  
SRR1271609.1031300.2- CAAATGGCAGCATCTGATTCTCTgtaagttgaacagatttctcttcatcccccttggc  
SRR1271609.12903351.2+ CAAATGGCAGCATCTGATTCTCTgtaagttgaacagatttctcttcatcccccttggc  
SRR1271610.19119218.1+ CAAATGGCAGCATCTGATTCTCTgtaagttgaacagatttctcttcatcccccttggc  
SRR1271610.5829611.2- CAAATGGCAGCATCTGATTCTCTgtaagttgaacagatttctcttcatcccccttggc  
SRR1271610.8517146.2- CAAATGGCAGCATCTGATTCTCTgtaagttgaacagatttctcttcatcccccttggc  
SRR1271611.30562393.1- CAAATGGCAGCATCTGATTCTCTgtaagttgaacagatttctcttcatcccccttggc  
SRR1271611.45475124.1+ CAAATGGCAGCATCTGATTCTCTgtaagttgaacagatttctcttcatcccccttggc  
SRR1271611.49933549.1+ CAAATGGCAGCATCTGATTCTCTgtaagttgaacagatttctcttcatcccccttggc  
SRR1271611.51705152.1- CAAATGGCAGCATCTGATTCTCTgtaagttgaacagatttctcttcatcccccttggc  
SRR1271611.5176815.2- CAAATGGCAGCATCTGATTCTCTgtaagttgaacagatttctcttcatcccccttggc  
SRR1271612.6153622.2- CAAATGGCAGCATCTGATTCTCTgtaagttgaacagatttctcttcatcccccttggc  
SRR1271615.5772241.2+ CAAATGGCAGCATCTGATTCTCTgtaagttgaacagatttctcttcatcccccttggc  
SRR1271616.2011111.1- CAAATGGCAGCATCTGATTCTCTgtaagttgaacagatttctcttcatcccccttggc

SRR1271616.6540135.1+ CAAATGGCAGCATCTGATTCTCTgtaagttgaacagatttctcttcatcccccttggc  
SRR1271617.108645868.2+ CAAATGGCAGCATCTGATTCTCTgtaagttggacagatttctcttcatccaccttggc  
SRR1271617.21164005.2- CAAATGGCAGCATCTGATTCTCTgtaagttgaacagatttctcttcatcccccttggc  
SRR1271617.35095789.1+ CAAATGGCAGCATCTGATTCTCTgtaagttgaacagatttctcttcatcccccttggc  
SRR1271617.49734526.2- CAAATGGCAGCATCTGATTCTCTgtaagttgaacagatttctcttcatcccccttggc  
SRR1271617.6275825.1+ CAAATGGCAGCATCTGATTCTCTgtaagttgaacagatttctcttcatcccccttggc  
SRR1271617.65566596.2+ CAAATGGCAGCATCTGATTCTCTgtaagttgaacagatttctcttcatcccccttggc  
SRR1271617.72688277.1+ CAAATGGCAGCATCTGATTCTCTgtaagttgaacagatttctcttcatcccccttggc  
SRR1271617.72923099.1+ CAAATGGCAGCATCTGATTCTCTgtaagttgaacagatttctcttcatcccccttggc  
SRR1271619.11721387.1- CAAATGGCAGCATCTGATTCTCTgtaagttgaacagatttctcttcatcccccttggc  
SRR1271620.10933616.2- CAAATGGCAGCATCTGATTCTCTgtaagttgaacagatttctcttcatcccccttggc  
SRR1271620.4399325.2+ CAAATGGCAGCATCTGATTCTCTgtaagttgaacagatttctcttcatcccccttggc  
SRR1271624.1867358.1- CAAATGGCAGCATCTGATTCTCTgtaagttgaacagatttctcttcatcccccttggc  
SRR1271624.5962316.1- CAAATGGCAGCATCTGATTCTCTgtaagttgaacagatttctcttcatcccccttggc  
SRR1271626.19282964.1- CAAATGGCAGCATCTGATTCTCTgtaagttgaacagatttctcttcatcccccttggc  
SRR1271626.27417879.1- CAAATGGCAGCATCTGATTCTCTgtaagttgaacagatttctcttcatcccccttggc  
SRR1271626.29048032.2- CAAATGGCAGCATCTGATTCTCTgtaagttgaacagatttctcttcatcccccttggc  
SRR1271626.8851170.2- CAAATGGCAGCATCTGATTCTCTgtaagttgaacagatttctcttcatcccccttggc  
SRR1271630.6773779.2+ CAAATGGCAGCATCTGATTCTCTgtaagttgaacagatttctcttcatcccccttggc  
SRR1271630.6944205.1- CAAATGGCAGCATCTGATTCTCTgtaagttgaacagatttctcttcatcccccttggc  
SRR1271631.13703327.1- CAAATGGCAGCATCTGATTCTCTgtaagttgaacagatttctcttcatcccccttggc  
SRR1271631.17796850.2- CAAATGGCAGCATCTGATTCTCTgtaagttgaacagatttctcttcatcccccttggc  
SRR1271631.37714877.2+ CAAATGGCAGCATCTGATTCTCTgtaagttgaacagatttctcttcatcccccttggc  
SRR1271631.38215481.1+ CAAATGGCAGCATCTGATTCTCTgtaagttgaacagatttctcttcatcccccttggc  
SRR1271631.39606297.2+ CAAATGGCAGCATCTGATTCTCTgtaagttgaacagatttctcttcatcccccttggc  
SRR1271631.47115470.1+ CAAATGGCAGCATCTGATTCTCTgtaagttgaacagatttctcttcatcccccttggc  
SRR1271631.53104753.2- CAAATGGCAGCATCTGATTCTCTgtaagttgaacagatttctcttcatcccccttggc  
SRR1271631.53790917.1- CAAATGGCAGCATCTGATTCTCTgtaagttgaacagatttctcttcatcccccttggc  
SRR1271631.60482848.1- CAAATGGCAGCATCTGATTCTCTgtaagttgaacagatttctcttcatcccccttggc  
SRR1271631.65104355.1+ CAAATGGCAGCATCTGATTCTCTgtaagttgaacagatttctcttcatcccccttggc  
SRR1271631.8158897.1+ CAAATGGCAGCATCTGATTCTCTgtaagttgaacagatttctcttcatcccccttggc  
SRR1271636.11917632.2+ CAAATGGCAGCATCTGATTCTCTgtaagttgaacagatttctcttcatcccccttggc  
SRR1271636.20236431.1- CAAATGGCAGCATCTGATTCTCTgtaagttgaacagatttctcttcatcccccttggc  
SRR1271637.9483811.2- CAAATGGCAGCATCTGATTCTCTgtaagttgaacagatttctcttcatcccccttggc  
SRR1271638.7137901.2- CAAATGGCAGCATCTGATTCTCTgtaagttgaacagatttctcttcatcccccttggc  
SRR1271639.12989136.1- CAAATGGCAGCATCTGATTCTCTgtaagttgaacagatttctcttcatcccccttggc  
SRR1271641.1828285.1- CAAATGGCAGCATCTGATTCTCTgtaagttgaacagatttctcttcatcccccttggc  
SRR1271641.2977584.2+ CAAATGGCAGCATCTGATTCTCTgtaagttgaacagatttctcttcatcccccttggc  
SRR1271642.249531.2- CAAATGGCAGCATCTGATTCTCTgtaagttgaacagatttctcttcatcccccttggc  
SRR1271642.3018005.2- CAAATGGCAGCATCTGATTCTCTgtaagttgaacagatttctcttcatcccccttggc  
SRR1271644.6211925.1- CAAATGGCAGCATCTGATTCTCTgtaagttgaacagatttctcttcatcccccttggc  
SRR1271656.31699611.2- CAAATGGCAGCATCTGATTCTCTgtaagttgaacagatttctcttcatcccccttggc  
SRR1271656.37726636.1- CAAATGGCAGCATCTGATTCTCTgtaagttgaacagatttctcttcatcccccttggc  
SRR1271656.42884483.1- CAAATGGCAGCATCTGATTCTCTgtaagttgaacagatttctcttcatcccccttggc  
SRR1271656.47447557.1+ CAAATGGCAGCATCTGATTCTCTgtaagttgaacagatttctcttcatcccccttggc  
SRR1271660.12843375.2+ CAAATGGCAGCATCTGATTCTCTgtaagttgaacagatttctcttcatcccccttggc  
SRR1271660.18416623.1+ CAAATGGCAGCATCTGATTCTCTgtaagttgaacagatttctcttcatcccccttggc  
SRR1271660.25394364.1+ CAAATGGCAGCATCTGATTCTCTgtaagttgaacagatttctcttcatcccccttggc  
SRR1271660.28173172.1+ CAAATGGCAGCATCTGATTCTCTgtaagttgaacagatttctcttcatcccccttggc  
SRR1271661.66238.1+ CAAATGGCAGCATCTGATTCTCTgtaagttgaacagatttctcttcatcccccttggc  
SRR1271661.9678304.2- CAAATGGCAGCATCTGATTCTCTgtaagttgaacagatttctcttcatcccccttggc  
SRR1271664.1051398.2+ CAAATGGCAGCATCTGATTCTCTgtaagttgaacagatttctcttcatcccccttggc  
SRR1271664.9315059.1- CAAATGGCAGCATCTGATTCTCTgtaagttgaacagatttctcttcatcccccttggc  
SRR1271665.16602572.2- CAAATGGCAGCATCTGATTCTCTgtaagttgaacagatttctcttcatcccccttggc  
SRR1271665.17092941.1+ CAAATGGCAGCATCTGATTCTCTgtaagttgaacagatttctcttcatcccccttggc  
SRR1271666.2776816.1- CAAATGGCAGCATCTGATTCTCTgtaagttgaacagatttctcttcatcccccttggc  
SRR1271667.7988823.1+ CAAATGGCAGCATCTGATTCTCTgtaagttgaacagatttctcttcatcccccttggc  
SRR1265959.13791605.1- AATGGCAGCATCTGATTCTCTgtaagttgaacagatttctcttcatcccccttggc  
SRR1266955.9340457.1- AATGGCAGCATCTGATTCTCTgtaagttgaacagatttctcttcatcccccttggc  
SRR1271631.89798142.1- AATGGCAGCATCTGATTCTCTgtaagttgaacagatttctcttcatcccccttggc  
SRR1271636.28227184.1+ AATGGCAGCATCTGATTCTCTgtaagttgaacagatttctcttcatcccccttggc  
SRR1271636.5133246.1+ AATGGCAGCATCTGATTCTCTgtaagttgaacagatttctcttcatcccccttggc  
SRR1271643.5399607.2+ AATGGCAGCATCTGATTCTCTgtaagttgaaaagatttctcttcatcccccttggc  
SRR1271617.18167979.2+ ATGGCAGCATCTGATTCTCTgtaagttgaacagatttctcttcatcccccttggc  
SRR1271627.9333660.2+ ATGGCAGCATCTGATTCTCTgtaagttgaacagatttctcttcatcccccttggc  
SRR1265423.845833.2- TGGCAGCATCTGATTCTCTgtaagttgaacagatttctcttcatcccccttggc  
SRR1266966.437734.1- TGGCAGCATCTGATTCTCTgtaagttgaacagatttctcttcatcccccttggc  
SRR1265105.380641.1+ GGCAGCATCTGATTCTCTgtaagttgaacagatttctcttcatcccccttggc  
SRR1266957.3246519.2- GGCAGCATCTGATTCTCTgtaagttgaacagatttctcttcatcccccttggc  
SRR1269727.7734711.1- GGCAGCATCTGATTCTCTgtaagttgaacagatttctcttcatcccccttggc  
SRR1271618.11104575.2+ GGCAGCATCTGATTCTCTgtaagttgaacagatttctcttcatcccccttggc  
SRR1271656.45740696.1- GCAGCATCTGATTCTCTgtaagttgaacagatttctcttcatcccccttggc  
SRR1266955.5156734.1- CAGCATCTGATTCTCTgtaagttgaaaagatttctcttcatcccccttggc  
SRR1269725.9933502.1+ CAGCATCTGATTCTCTgtaagttgaacagatttctcttcatcccccttggc  
SRR1271623.13691659.2+ CAGCATCTGATTCTCTgtaagttgaacagatttctcttcatcccccttggc  
SRR1265093.569959.2+ AGCATCTGATTCTCTgtaagttgaacagatttctcttcatcccccttggc  
SRR1265418.2535443.2- AGCATCTGATTCTCTgtaagttgaacagatttctcttcatcccccttggc  
SRR1265485.16227498.1+ AGCATCTGATTCTCTgtaagttgaacagatttctcttcatcccccttggc  
SRR1271631.73182052.2- AGCATCTGATTCTCTgtaagttgaacagatttctcttcatcccccttggc  
SRR1271640.6710261.2+ GCATCTGATTCTCTgtaagttgaacagatttctcttcatcccccttggc  
SRR1266957.1004692.1- GCATCTGATTCTCTgtaagttgaacagatttctcttcatcccccttggc  
SRR1271624.7572085.1+ GCATCTGATTCTCTgtaagttgaacagatttctcttcatcccccttggc  
SRR1271660.17854389.2+ GCATCTGATTCTCTgtaagttgaacagatttctcttcatcccccttggc  
SRR1265093.9367806.2- CATCTTATTCTCTgtaagttgaacagatttctcttcatcccccttggc

SRR1266954.5050757.1+  
SRR1266957.3195693.1-  
SRR1269703.3019169.1+  
SRR1271606.314344.1+  
SRR1271639.16935460.2-  
SRR1266951.7331141.2+  
SRR1266947.22343126.1+  
SRR1266963.20780247.2+  
SRR1265428.8823863.2+  
SRR1265487.506939.1+  
SRR1266955.7154550.2-  
SRR1271611.1989144.1-  
SRR1271660.19233729.2-  
SRR1271611.10364010.2-  
SRR1271623.3169311.1+  
SRR1271606.223591.2+  
SRR1271630.3176113.2-  
SRR1271666.16618310.2+  
SRR1271617.69327822.1+  
SRR1265108.2919013.2+  
SRR1265425.8225295.1-  
SRR1265108.2515604.2-  
SRR1265427.10637217.2+  
SRR1271617.85496141.1+  
SRR1271623.14435698.1-  
SRR1271635.8499862.1-  
SRR1271664.496248.2-

CATCTGATTCTGTgtaagttgaacagatttcctcttcatccccctttgcc  
CATCTTATTCTCTgtaagttgaacagatttcctcttcaacccccctttgcc  
CATCTGATTCTCTgtaagttgaacagatttcctcttcatccccctttgcc  
CATCTGATTCTCTgtaagttgaacagatttcctcttcatccccctttgcc  
CATCTGATTCTCTgtaagttgaacagatttcctcttcatccccctttgcc  
TCTGATTCTCTgtaagttgaacagatttcctcttcatccccctttgcc  
CTGATTCTCTgtaagttgaacagatttcctcttcatccccctttgcc  
CTGATTCTCTgtaagttgaacagatttcctcttcatccccctttgcc  
TGATTCTCTgtaagttgaacagatttcctcttcatccccctttgcc  
TGATTCTCTgtaagttgaacagatttcctcttcatccccctttgcc  
TGATTCTCTgtaagttgaacagatttcctcttcatccccctttgcc  
TGATTCTCTgtaagttgaacagatttcctcttcatccccctttgcc  
TTCTCTgtaagttgaacagatttcctcttcatccccctttgcc  
TCTCTgtaagtttaacagatttcctcttcaacccccctttgcc  
TCTCTgtaagttgaacagatttcctcttcatccccctttgcc  
CTCTgtaagttgaacagatttcctcttcatccccctttgcc  
CTCTgtaagttgaacagatttcctcttcatccccctttgcc  
CTCTgtaagttgaacagatttcctcttcatccccctttgcc  
CTCTgtaagttgaacagatttcctcttcatccccctttgcc  
TCTgtaagttgaacagatttcctcttcatccccctttgcc  
CTgtaagttgaacagatttcctcttcatccccctttgcc  
CTgtaagggtgaacagatttcctcttcatccccctttccc  
Tgtaagttgaacagctttccgcttcatccccctttgcc  
Tgtaagttgaacagatttcctcttcatccccctttgcc  
Tgtaagttgaacagatttcctcttcatccccctttgcc  
Tgtaagttgaacagatttcctcttcatccccctttgcc  
Tgtaagttgaacagatttcctcttcatccccctttgcc  
Tgtaagttgaacagatttcctcttcatccccctttgcc  
Tgtaagttgaacagatttcctcttcatccccctttgcc

consensus

CAAAATGGCAGCATCTGATTCTCTgtaagttgaacagatttcctcttcatccccctttgcc

---

## D. Ground tit (No. 5), exon 1, WGS data

- CAP3 alignment of WGS data spanning exon 1 (uppercase letters)

```

      .   :   .   :   .   :   .   :   .   :
SRR765711.127108613.2+ ctgccaaggtatcagcaagacttagaggtaccagagactgcagagA
SRR765714.96762027.1- ctgccaaggtatcagcaagacttagaggtaccagagactgcagagAT
SRR765715.28535392.2- ctgccaaggtatcagcaagacttagaggtaccagagactgcagagATG
SRR765715.40711716.2+ ctgccaaggtatcagcaagacttagaggtaccagagactgcagagATG
SRR765715.15325357.1+ ctgccaaggtatcagcaagacttagaggtaccagagactgcagagATGA
SRR765715.20079751.1+ ctgccaaggtatcagcaagacttagaggtaccagagactgcagagATGA
SRR765711.98788597.1+ ctgccaaggtatcagcaagacttagaggtaccagagactgcagagATGAT
SRR765712.191725402.2- ctgccaaggtatcagcaagacttagaggtaccagagactgcagagATGAT
SRR765712.221242791.2+ ctgccaaggtatcagcaagacttagaggtaccagagactgcagagATGAT
SRR765714.120567258.1- ctgccaaggtatcagcaagacttagaggtaccagagactgcagagATGAT
SRR765714.60800763.1- ctgccaaggtatcagcaagacttagaggtaccagagactgcagagATGAT
SRR765714.90916047.1- ctgccaaggtatcagcaagacttagaggtaccagagactgcagagATGAT
SRR765710.43360571.2- ctgccaaggtatcagcaagacttagaggtaccagagactgcagagATGATAG
SRR765711.93189275.1+ ctgccaaggtatcagcaagacttagaggtaccagagactgcagagATGATAG
SRR765714.80472540.1- ctgccaaggtatcagcaagacttagaggtaccagagactgcagagATGATAG
SRR747825.25590730.1- ctgccaaggtatcagcaagacttagaggtaccagagactgcagagATGATAGT
SRR747825.25736700.1- ctgccaaggtatcagcaagacttagaggtaccagagactgcagagATGATAGT
SRR765711.43336047.1+ ctgccaaggtatcagcaagacttagaggtaccagagactgcagagATGATAGC
SRR765712.202793541.2- ctgccaaggtatcagcaagacttagaggtaccagagactgcagagATGATAGTG
SRR765709.3594615.1- ctgccaaggtatcagcaagacttagaggtaccagagactgcagagATGATAGTGAT
SRR765711.27058616.1+ ctgccaaggtatcagcaagacttagaggtaccagagactgcagagATGATAGTGAT
SRR765712.201848235.2+ ctgccaaggtatcagcaagacttagaggtaccagagactgcagagATGATAGTGAT
SRR765712.223930320.1+ ctgccaaggtatcagcaagacttagaggtaccagagactgcagagATGATAGTGAT
SRR765712.71905088.1- ctgccaaggtatcagcaagacttagaggtaccagagactgcagagATGATAGTGAT
SRR765714.96238274.1- ctgccaaggtatcagcaagacttagaggtaccagagactgcagagATGATAGTGAT
SRR765715.25873242.1+ ctgccaaggtatcagcaagacttagaggtaccagagactgcagagATGATAGCGAT
SRR765709.50792463.1- ctgccaaggtatcagcaagacttagaggtaccagagactgcagagATGATAGCGATG
SRR765710.10978190.1- ctgccaaggtatcagcaagacttagaggtaccagagactgcagagATGATAGCGATGTT
SRR765709.11048444.2- ctgccaaggtatcagcaagacttagaggtaccagagactgcagagATGATAGTGATGTT
SRR765709.15051614.2+ ctgccaaggtatcagcaagacttagaggtaccagagactgcagagATGATAGTGATGTT
SRR765709.17947042.1+ ctgccaaggtatcagcaagacttagaggtaccagagactgcagagATGATAGTGATGTT
SRR765710.84981878.1- ctgccaaggtatcagcaagacttagaggtaccagagactgcagagATGATAGCGATGTT
SRR765710.14520134.2+ ctgccaaggtatcagcaagacttagaggtaccagagactgcagagATGATAGCGATGTT
SRR765710.20061203.1+ ctgccaaggtatcagcaagacttagaggtaccagagactgcagagATGATAGCGATGTT
SRR765710.30559922.2- ctgccaaggtatcagcaagacttagaggtaccagagactgcagagATGATAGTGATGTT
SRR765710.48969246.1+ ctgccaaggtatcagcaagacttagaggtaccagagactgcagagATGATAGTGATGTT
SRR765710.52432273.1+ ctgccaaggtatcagcaagacttagaggtaccagagactgcagagATGATAGCGATGTT
SRR765710.52899931.2+ ctgccaaggtatcagcaagacttagaggtaccagagactgcagagATGATAGCGATGTT
SRR765710.58473373.1- ctgccaaggtatcagcaagacttagaggtaccagagactgcagagATGATAGCGATGTT
SRR765710.59709380.1- ctgccaaggtatcagcaagacttagaggtaccagagactgcagagATGATAGTGATGTT
SRR765710.62324211.2+ ctgccaaggtatcagcaagacttagaggtaccagagactgcagagATGATAGTGATGTT
SRR765710.6314.2+ ctgccaaggtatcagcaagacttagaggtaccagagactgcagagATGATAGTGATGTT
SRR765710.72900439.2+ ctgccaaggtatcagcaagacttagaggtaccagagactgcagagATGATAGCGATGTT
SRR765710.78927757.2- ctgccaaggtatcagcaagacttagaggtaccagagactgcagagATGATAGCGATGTT
SRR765710.83849557.2+ ctgccaaggtatcagcaagacttagaggtaccagagactgcagagATGATAGCGATGTT
SRR765711.115303767.1+ ctgccaaggtatcagcaagacttagaggtaccagagactgcagagATGATAGCGATGTT
SRR765711.116926262.2+ ctgccaaggtatcagcaagacttagaggtaccagagactgcagagATGATAGCGATGTT
SRR765711.12467307.2- ctgccaaggtatcagcaagacttagaggtaccagagactgcagagATGATAGCGATGTT
SRR765711.125009762.2+ ctgccaaggtatcagcaagacttagaggtaccagagactgcagagATGATAGCGATGTT
SRR765711.136262268.1+ ctgccaaggtatcagcaagacttagaggtaccagagactgcagagATGATAGCGATGTT
SRR765711.136914716.1+ ctgccaaggtatcagcaagacttagaggtaccagagactgcagagATGATAGTGATGTT
SRR765711.141606739.1+ ctgccaaggtatcagcaagacttagaggtaccagagactgcagagATGATAGTGATGTT
SRR765711.39537275.2+ ctgccaaggtatcagcaagacttagaggtaccagagactgcagagATGATAGCGATGTT
SRR765711.39985328.1+ ctgccaaggtatcagcaagacttagaggtaccagagactgcagagATGATAGTGATGTT
SRR765711.57382922.1+ ctgccaaggtatcagcaagacttagaggtaccagagactgcagagATGATAGTGATGTT
SRR765711.58178683.2+ ctgccaaggtatcagcaagacttagaggtaccagagactgcagagATGATAGCGATGTT
SRR765711.65007596.1+ ctgccaaggtatcagcaagacttagaggtaccagagactgcagagATGATAGCGATGTT
SRR765711.75189809.1+ ctgccaaggtatcagcaagacttagaggtaccagagactgcagagATGATAGCGATGTT
SRR765711.75336142.1+ ctgccaaggtatcagcaagacttagaggtaccagagactgcagagATGATAGTGATGTT
SRR765711.90300589.2+ ctgccaaggtatcagcaagacttagaggtaccagagactgcagagATGATAGTGATGTT
SRR765711.96129668.2+ ctgccaaggtatcagcaagacttagaggtaccagagactgcagagATGATAGCGATGTT
SRR765712.102108300.1+ ctgccaaggtatcagcaagacttagaggtaccagagactgcagagATGATAGTGATGTT
SRR765712.103022563.2- ctgccaaggtatcagcaagacttagaggtaccagagactgcagagATGATAGTGATGTT
SRR765712.108514153.2+ ctgccaaggtatcagcaagacttagaggtaccagagactgcagagATGATAGTGATGTT
SRR765712.128813487.2- ctgccaaggtatcagcaagacttagaggtaccagagactgcagagATGATAGTGATGTT
SRR765712.170972669.2+ ctgccaaggtatcagcaagacttagaggtaccagagactgcagagATGATAGTGATGTT
SRR765712.178874795.1+ ctgccaaggtatcagcaagacttagaggtaccagagactgcagagATGATAGTGATGTT
SRR765712.19285418.2- ctgccaaggtatcagcaagacttagaggtaccagagactgcagagATGATAGTGATGTT
SRR765712.204517588.1- ctgccaaggtatcagcaagacttagaggtaccagagactgcagagATGATAGTGATGTT
SRR765712.209293117.1- ctgccaaggtatcagcaagacttagaggtaccagagactgcagagATGATAGCGATGTT
SRR765712.221242791.1- ctgccaaggtatcagcaagacttagaggtaccagagactgcagagATGATAGCGATGTT
SRR765712.227153236.1+ ctgccaaggtatcagcaagacttagaggtaccagagactgcagagATGATAGCGATGTT
SRR765712.227855078.2- ctgccaaggtatcagcaagacttagaggtaccagagactgcagagATGATAGTGATGTT
SRR765712.36663455.2- ctgccaaggtatcagcaagacttagaggtaccagagactgcagagATGATAGTGATGTT
SRR765712.39001705.1- ctgccaaggtatcagcaagacttagaggtaccagagactgcagagATGATAGTGATGTT

```

SRR765712.44471210.2+ ctgcccaaggtatcagcaagacttagaggtaccagagactgcagagATGATAGCGATGTT  
SRR765712.89074862.2- ctgcccaaggtatcagcaagacttagaggtaccagagactgcagagATGATAGTGTGTT  
SRR765712.9126008.2+ ctgcccaaggtatcagcaagacttagaggtaccagagactgcagagATGATAGCGATGTT  
SRR765714.103477576.1- ctgcccaaggtatcagcaagacttagaggtaccagagactgcagagATGATAGTGTGTT  
SRR765714.104135391.1- ctgcccaaggtatcagcaagacttagaggtaccagagactgcagagATGATAGTGTGTT  
SRR765714.115256777.1- ctgcccaaggtatcagcaagacttagaggtaccagagactgcagagATGATAGTGTGTT  
SRR765714.118843472.1- ctgcccaaggtatcagcaagacttagaggtaccagagactgcagagATGATAGTGTGTT  
SRR765714.1288495.1- ctgcccaaggtatcagcaagacttagaggtaccagagactgcagagATGATAGCGATGTT  
SRR765714.129290600.1- ctgcccaaggtatcagcaagacttagaggtaccagagactgcagagATGATAGTGTGTT  
SRR765714.139482311.1+ ctgcccaaggtatcagcaagacttagaggtaccagagactgcagagATGATAGCGATGTT  
SRR765714.144000723.2- ctgcccaaggtatcagcaagacttagaggtaccagagactgcagagATGATAGTGTGTT  
SRR765714.152535865.1- ctgcccaaggtatcagcaagacttagaggtaccagagactgcagagATGATAGTGTGTT  
SRR765714.179739684.1- ctgcccaaggtatcagcaagacttagaggtaccagagactgcagagATGATAGTGTGTT  
SRR765714.181419219.2- ctgcccaaggtatcagcaagacttagaggtaccagagactgcagagATGATAGTGTGTT  
SRR765714.185244055.1- ctgcccaaggtatcagcaagacttagaggtaccagagactgcagagATGATAGCGATGTT  
SRR765714.196951609.2- ctgcccaaggtatcagcaagacttagaggtaccagagactgcagagATGATAGCGATGTT  
SRR765714.20194193.2+ ctgcccaaggtatcagcaagacttagaggtaccagagactgcagagATGATAGCGATGTT  
SRR765714.20771235.1- ctgcccaaggtatcagcaagacttagaggtaccagagactgcagagATGATAGTGTGTT  
SRR765714.623864.1- ctgcccaaggtatcagcaagacttagaggtaccagagactgcagagATGATAGTGTGTT  
SRR765714.71369973.2- ctgcccaaggtatcagcaagacttagaggtaccagagactgcagagATGATAGCGATGTT  
SRR765714.87789096.1- ctgcccaaggtatcagcaagacttagaggtaccagagactgcagagATGATAGTGTGTT  
SRR765714.95133774.1- ctgcccaaggtatcagcaagacttagaggtaccagagactgcagagATGATAGTGTGTT  
SRR765715.12220715.1- ctgcccaaggtatcagcaagacttagaggtaccagagactgcagagATGATAGTGTGTT  
SRR765715.15093018.1- ctgcccaaggtatcagcaagacttagaggtaccagagactgcagagATGATAGTGTGTT  
SRR765715.29951049.1+ ctgcccaaggtatcagcaagacttagaggtaccagagactgcagagATGATAGTGTGTT  
SRR765715.39302854.1- ctgcccaaggtatcagcaagacttagaggtaccagagactgcagagATGATAGTGTGTT  
SRR765716.412165.1+ ctgcccaaggtatcagcaagacttagaggtaccagagactgcagagATGATAGTGTGTT  
SRR765716.5724759.1+ ctgcccaaggtatcagcaagacttagaggtaccagagactgcagagATGATAGTGTGTT  
SRR765716.7847479.2+ ctgcccaaggtatcagcaagacttagaggtaccagagactgcagagATGATAGTGTGTT  
SRR765710.52880643.1- ctgcccaaggtatcagcaagacttagaggtaccagagactgcagagATGATAGTGTGTT  
SRR765711.16163481.2- gccaaggtatcagcaagacttagaggtaccagagactgcagagATGATAGCGATGTT  
SRR765711.76231448.1+ gccaaggtatcagcaagacttagaggtaccagagactgcagagATGATAGTGTGTT  
SRR765715.17513876.2+ gccaaggtatcagcaagacttagaggtaccagagactgcagagATGATAGCGATGTT  
SRR765711.106750007.1- cccaaggtatcagcaagacttagaggtaccagagactgcagagATGATAGCGATGTT  
SRR765709.19446554.1- ccaaggtatcagcaagacttagaggtaccagagactgcagagATGATAGCGATGTT  
SRR765711.78666991.2- ccaaggtatcagcaagacttagaggtaccagagactgcagagATGATAGTGTGTT  
SRR765710.58041512.1- caaggtatcagcaagacttagaggtaccagagactgcagagATGATAGCGATGTT  
SRR765711.115598291.2- aaggtatcagcaagacttagaggtaccagagactgcagagATGATAGTGTGTT  
SRR765710.50972813.1- aggtatcagcaagacttagaggtaccagagactgcagagATGATAGTGTGTT  
SRR765712.166853237.1+ aggtatcagcaagacttagaggtaccagagactgcagagATGATAGTGTGTT  
SRR765712.7129698.2- aggtatcagcaagacttagaggtaccagagactgcagagATGATAGCGATGTT  
SRR765711.24558845.1- gtatcagcaagacttagaggtaccagagactgcagagATGATAGCGATGTT  
SRR765711.79934409.2- gtatcagcaagacttagaggtaccagagactgcagagATGATAGTGTGTT  
SRR765712.73428311.2+ gtatcagcaagacttagaggtaccagagactgcagagATGATAGCGATGTT  
SRR765709.56879908.2+ tatcagcaagacttagaggtaccagagactgcagagATGATAGTGTGTT  
SRR765712.70145514.2- cagcaagacttagaggtaccagagactgcagagATGATAGTGTGTT  
SRR765711.79688649.1+ agcaagacttagaggtaccagagactgcagagATGATAGTGTGTT  
SRR765712.106710182.1+ agcaagacttagaggtaccagagactgcagagATGATAGCGATGTT  
SRR765712.82312151.1- agcaagacttagaggtaccagagactgcagagATGATAGTGTGTT  
SRR765714.105503876.2- agcaagacttagaggtaccagagactgcagagATGATAGTGTGTT  
SRR765714.115172876.2- agcaagacttagaggtaccagagactgcagagATGATAGTGTGTT  
SRR765712.141280360.1- gcaagacttagaggtaccagagactgcagagATGATAGCGATGTT  
SRR765710.6874784.2+ agacttagaggtaccagagactgcagagATGATAGCGATGTT  
SRR765711.70787159.1+ acttagaggtaccagagactgcagagATGATAGTGTGTT  
SRR765715.41596894.1+ tagaggtaccagagactgcagagATGATAGTGTGTT  
SRR765711.81304240.1- agaggtaccagagactgcagagATGATAGCGATGTT  
SRR765712.80351652.1+ agaggtaccagagactgcagagATGATAGTGTGTT  
SRR765714.90251705.1- agaggtaccagagactgcagagATGATAGCGATGTT  
SRR765710.77934178.2+ gagggtaccagagactgcagagATGATAGTGTGTT  
SRR765711.42060791.1+ gagggtaccagagactgcagagATGATAGCGATGTT  
SRR747825.15514581.2+ aggtaccagagactgcagagATGATAGTGTGTT  
SRR747825.2399014.1+ aggtaccagagactgcagagATGATAGTGTGTT  
SRR747825.25077350.1+ aggtaccagagactgcagagATGATAGTGTGTT  
SRR747825.32125711.2+ aggtaccagagactgcagagATGATAGTGTGTT  
SRR747825.34186382.2+ aggtaccagagactgcagagATGATAGTGTGTT  
SRR747825.36676712.1+ aggtaccagagactgcagagATGATAGTGTGTT  
SRR747825.36796222.1+ aggtaccagagactgcagagATGATAGTGTGTT  
SRR747825.37802110.2+ aggtaccagagactgcagagATGATAGTGTGTT  
SRR747825.41358891.2+ aggtaccagagactgcagagATGATAGTGTGTT  
SRR747825.42101809.1+ aggtaccagagactgcagagATGATAGTGTGTT  
SRR747825.42675926.1+ aggtaccagagactgcagagATGATAGTGTGTT  
SRR747825.7479104.2+ aggtaccagagactgcagagATGATAGTGTGTT  
SRR747825.9216947.2+ aggtaccagagactgcagagATGATAGTGTGTT  
SRR765709.89392740.2- gtaccagagactgcagagATGATAGCGATGTT  
SRR765711.58856886.1- gtaccagagactgcagagATGATAGCGATGTT  
SRR765712.223930320.2- taccagagactgcagagATGATAGTGTGTT  
SRR765714.15028586.1- taccagagactgcagagATGATAGCGATGTT  
SRR765716.250216.2- taccagagactgcagagATGATAGCGATGTT  
SRR765716.25173572.2- taccagagactgcagagATGATAGCGATGTT  
SRR765716.26119942.2- taccagagactgcagagATGATAGCGATGTT  
SRR765710.48848881.2+ taccagagactgcagagATGATAGCGATGTT  
SRR765715.8423602.1+ ccagagactgcagagATGATAGCGATGTT  
SRR765710.83849557.1- ccagagactgcagagATGATAGCGATGTT  
SRR765710.62324211.1- agagactgcagagATGATAGCGATGTT  
gagactgcagagATGATAGTGTGTT





SRR765714.129290600.1- CTTTTCAGGAATCAAGAGAA  
SRR765714.20771235.1- CTTTTCAGGAATCAAGAGAA  
SRR765714.87789096.1- CTTTTCAGGAATCAAGAGAA  
SRR765711.136914716.1+ CTTTTCAGGAATCAAGAGAAT  
SRR765712.36663455.2- CTTTTCAGGAATCAAGAGAAAT  
SRR765712.103022563.2- CTTTTCAGGAATCAAGAGAATG  
SRR765714.104135391.1- CTTTTCAGGAATCAAGAGAATG  
SRR765715.15093018.1- CTTTTCAGGAATCAAGAGAATG  
SRR765709.17947042.1+ CTTTTCAGGAATCAAGAGAATGCTC  
SRR765711.39537275.2+ CTTTTCAGGAATCAAGAGAATGCTC  
SRR765712.178874795.1+ CTTTTCAGGAATCAAGAGAATGCTC  
SRR765712.221242791.1- CTTTTCAGGAATCAAGAGAATGCTC  
SRR765712.39001705.1- CTTTTCAGGAATCAAGAGAATGCTC  
SRR765710.72900439.2+ CTTTTCAGGAATCAAGAGAATGCTCT  
SRR765711.125009762.2+ CTTTTCAGGAATCAAGAGAATGCTCT  
SRR765711.75189809.1+ CTTTTCAGGAATCAAGAGAATGCTCT  
SRR765712.89074862.2- CTTTTCAGGAATCAAGAGAATGCTCT  
SRR765714.115256777.1- CTTTTCAGGAATCAAGAGAATGCTCT  
SRR765714.185244055.1- CTTTTCAGGAATCAAGAGAATGCTCT  
SRR765711.115303767.1+ CTTTTCAGGAATCAAGAGAATGCTCTT  
SRR765710.6314.2+ CTTTTCAGGAATCAAGAGAATGCTCTTC  
SRR765711.90300589.2+ CTTTTCAGGAATCAAGAGAATGCTCTTC  
SRR765712.102108300.1+ CTTTTCAGGAATCAAGAGAATGCTCTTC  
SRR765714.196951609.2- CTTTTCAGGAATCAAGAGAATGCTCTTC  
SRR765714.71369973.2- CTTTTCAGGAATCAAGAGAATGCTCTTC  
SRR765710.59709380.1- CTTTTCAGGAATCAAGAGAATGCTCTTCC  
SRR765714.144000723.2- CTTTTCAGGAATCAAGAGAATGCTCTTCC  
SRR765709.84981878.1- CTTTTCAGGAATCAAGAGAATGCTCTTCCCTC  
SRR765712.19285418.2- CTTTTCAGGAATCAAGAGAATGCTCTTCCCTC  
SRR765715.8423602.1+ CTTTTCAGGAATCAAGAGAATGCTCTTCCCTC  
SRR765710.48969246.1+ CTTTTCAGGAATCAAGAGAATGCTCTTCCCTCTT  
SRR765711.116926262.2+ CTTTTCAGGAATCAAGAGAATGCTCTTCCCTTT  
SRR765711.136262268.1+ CTTTTCAGGAATCAAGAGAATGCTCTTCCCTTT  
SRR765709.11048444.2- CTTTTCAGGAATCAAGAGAATGCTCTTCCCTTTG  
SRR765710.30559922.2- CTTTTCAGGAATCAAGAGAATGCTCTTCCCTTTG  
SRR765711.12467307.2- CTTTTCAGGAATCAAGAGAATGCTCTTCCCTTTG  
SRR765712.170972669.2+ CTTTTCAGGAATCAAGAGAATGCTCTTCCCTTTG  
SRR765715.39302854.1- CTTTTCAGGAATCAAGAGAATGCTCTTCCCTTTG  
SRR765710.20061203.1+ CTTTTCAGGAATCAAGAGAATGCTCTTCCCTTTGT  
SRR765711.75336142.1+ CTTTTCAGGAATCAAGAGAATGCTCTTCCCTTTGT  
SRR765712.209293117.1- CTTTTCAGGAATCAAGAGAATGCTCTTCCCTTTGT  
SRR765711.57382922.1+ CTTTTCAGGAATCAAGAGAATGCTCTTCCCTTTGT  
SRR765712.108514153.2+ CTTTTCAGGAATCAAGAGAATGCTCTTCCCTTTGTT  
SRR765712.44471210.2+ CTTTTCAGGAATCAAGAGAATGCTCTTCCCTTTGTTCC  
SRR765711.65007596.1+ CTTTTCAGGAATCAAGAGAATGCTCTTCCCTTTGTTCCCT  
SRR765714.118843472.1- CTTTTCAGGAATCAAGAGAATGCTCTTCCCTTTGTTCCCT  
SRR765710.78927757.2- CTTTTCAGGAATCAAGAGAATGCTCTTCCCTTTGTTCCCTC  
SRR765715.16533716.2+ CTTTTCAGGAATCAAGAGAGTCTCTTCCCTTTGTTCCCTCC  
SRR765710.52880643.1- CTTTTCAGGAATCAAGAGAATGCTCTTCCCTTTGTTCCCTCCC  
SRR765711.16163481.2- CTTTTCAGGAATCAAGAGAATGCTCTTCCCTTTGTTCCCTCCCA  
SRR765711.76231448.1+ CTTTTCAGGAATCAAGAGAATGCTCTTCCCTTTGTTCCCTCCCA  
SRR765711.106750007.1- CTTTTCAGGAATCAAGAGAATGCTCTTCCCTTTGTTCCCTCCCAT  
SRR765709.19446554.1- CTTTTCAGGAATCAAGAGAATGCTCTTCCCTTTGTTCCCTCCCATG  
SRR765711.78666991.2- CTTTTCAGGAATCAAGAGAATGCTCTTCCCTTTGTTCCCTCCCATG  
SRR765710.58041512.1- CTTTTCAGGAATCAAGAGAATGCTCTTCCCTTTGTTCCCTCCCATGC  
SRR765711.115598291.2- CTTTTCAGGAATCAAGAGAATGCTCTTCCCTTTGTTCCCTCCCATGCT  
SRR765710.50972813.1- CTTTTCAGGAATCAAGAGAATGCTCTTCCCTTTGTTCCCTCCCATGCTC  
SRR765712.166853237.1+ CTTTTCAGGAATCAAGAGAATGCTCTTCCCTTTGTTCCCTCCCATGCTC  
SRR765712.7129698.2- CTTTTCAGGAATCAAGAGAATGCTCTTCCCTTTGTTCCCTCCCATGCTC  
SRR765711.24558845.1- CTTTTCAGGAATCAAGAGAATGCTCTTCCCTTTGTTCCCTCCCATGCTCTT  
SRR765711.79934409.2- CTTTTCAGGAATCAAGAGAATGCTCTTCCCTTTGTTCCCTCCCATGCTCTT  
SRR765712.73428311.2+ CTTTTCAGGAATCAAGAGAATGCTCTTCCCTTTGTTCCCTCCCATGCTCTT  
SRR765709.56879908.2+ CTTTTCAGGAATCAAGAGAATGCTCTTCCCTTTGTTCCCTCCCATGCTCTTG  
SRR765711.79688649.1+ CTTTTCAGGAATCAAGAGAATGCTCTTCCCTTTGTTCCCTCCCATGCTCTTGTT  
SRR765712.70145514.2- CTTTTCAGGAATCAAGAGAATGCTCTTCCCTTTGTTCCCTCCCATGCTCTTGTT  
SRR765714.105503876.2- CTTTTCAGGAATCAAGAGAATGCTCTTCCCTTTGTTCCCTCCCATGCTCTTGTT  
SRR765714.115172876.2- CTTTTCAGGAATCAAGAGAATGCTCTTCCCTTTGTTCCCTCCCATGCTCTTGTT  
SRR765712.106710182.1+ CTTTTCAGGAATCAAGAGAATGCTCTTCCCTTTGTTCCCTCCCATGCTCTTGTT  
SRR765712.82312151.1- CTTTTCAGGAATCAAGAGAATGCTCTTCCCTTTGTTCCCTCCCATGCTCTTGTT  
SRR765712.141280360.1- CTTTTCAGGAATCAAGAGAATGCTCTTCCCTTTGTTCCCTCCCATGCTCTTGTT  
SRR765710.6874784.2+ CTTTTCAGGAATCAAGAGAATGCTCTTCCCTTTGTTCCCTCCCATGCTCTTGTTCTGGCC  
SRR747825.15514581.2+ CTTTTCAGGAATCAAGAGAATGCTCTTCCCTTTGTTCCCTCCCATGCTCTTGTTCTGGCCA  
SRR747825.2399014.1+ CTTTTCAGGAATCAAGAGAATGCTCTTCCCTTTGTTCCCTCCCATGCTCTTGTTCTGGCCA  
SRR747825.25077350.1+ CTTTTCAGGAATCAAGAGAATGCTCTTCCCTTTGTTCCCTCCCATGCTCTTGTTCTGGCCA  
SRR747825.32125711.2+ CTTTTCAGGAATCAAGAGAATGCTCTTCCCTTTGTTCCCTCCCATGCTCTTGTTCTGGCCA  
SRR747825.34186382.2+ CTTTTCAGGAATCAAGAGAATGCTCTTCCCTTTGTTCCCTCCCATGCTCTTGTTCTGGCCA  
SRR747825.36676712.1+ CTTTTCAGGAATCAAGAGAATGCTCTTCCCTTTGTTCCCTCCCATGCTCTTGTTCTGGCCA  
SRR747825.36796222.1+ CTTTTCAGGAATCAAGAGAATGCTCTTCCCTTTGTTCCCTCCCATGCTCTTGTTCTGGCCA  
SRR747825.37802110.2+ CTTTTCAGGAATCAAGAGAATGCTCTTCCCTTTGTTCCCTCCCATGCTCTTGTTCTGGCCA  
SRR747825.41358891.2+ CTTTTCAGGAATCAAGAGAATGCTCTTCCCTTTGTTCCCTCCCATGCTCTTGTTCTGGCCA  
SRR747825.42101809.1+ CTTTTCAGGAATCAAGAGAATGCTCTTCCCTTTGTTCCCTCCCATGCTCTTGTTCTGGCCA  
SRR747825.42675926.1+ CTTTTCAGGAATCAAGAGAATGCTCTTCCCTTTGTTCCCTCCCATGCTCTTGTTCTGGCCA  
SRR747825.7479104.2+ CTTTTCAGGAATCAAGAGAATGCTCTTCCCTTTGTTCCCTCCCATGCTCTTGTTCTGGCCA  
SRR747825.9216947.2+ CTTTTCAGGAATCAAGAGAATGCTCTTCCCTTTGTTCCCTCCCATGCTCTTGTTCTGGCCA



SRR765714.149627387.1+  
 SRR765712.21952163.1+  
 SRR765711.58178683.1-  
 SRR765714.11920695.2+  
 SRR765711.116926262.1-  
 SRR765712.152915721.1+  
 SRR765711.75336142.2-  
 SRR765712.102108300.2-  
 SRR765712.117148243.2+  
 SRR765711.117156605.2+  
 SRR765713.24757498.1+  
 SRR765709.13162642.2+  
 SRR765712.170972669.1-  
 SRR765712.232059580.1+  
 SRR765711.115303767.2-  
 SRR765712.21124108.2+  
 SRR765712.228231813.2+  
 SRR765711.136262268.2-  
 SRR765710.1716354.2+  
 SRR765714.39979308.2-  
 SRR765715.15378963.1+  
 SRR765711.75189809.2-  
 SRR765712.106710182.2-  
 SRR765712.11807389.1+  
 SRR765715.22812006.1-  
 SRR765714.149230942.1+  
 SRR765710.6874784.1-  
 SRR765711.39537275.1-  
 SRR765711.90300589.1-  
 SRR765712.166853237.2-  
 SRR765711.15546394.2+  
 SRR765711.92360717.1+  
 SRR765715.30571678.1+  
 SRR765715.36409904.1+  
 SRR765710.77934178.1-  
 SRR765712.179891936.1+  
 SRR765711.42060791.2-  
 SRR765711.70787159.2-  
 SRR765712.203325839.1+  
 SRR765710.48848881.1-  
 SRR765711.83011887.1+  
 SRR765712.46974017.1+  
 SRR765709.26128387.2+  
 SRR765710.29061231.2+  
 SRR765716.24592103.2+  
 SRR765716.287615.2+  
 SRR765716.12328120.2+  
 SRR765716.14688142.2+  
 SRR765716.19440677.2+  
 SRR765716.25986022.2+  
 SRR765711.31552385.1+  
 SRR765711.120800792.1-  
 SRR765711.81304240.2-  
 SRR765713.15891820.1-  
 SRR765715.46017009.2+  
 SRR765710.53338134.2-  
 SRR765712.73428311.1-  
 SRR765711.39834426.2+  
 SRR765712.29757431.2-  
 SRR765712.76576490.1+

CAAGAGAATGCTCTTCCTCTTGTTCCCTCCCATGCTCTTGTTCTGGCCA  
 AAGAGAATGCTCTTCCTCTTGTTCCCTCCCATGCTCTTGTTCTGGCCA  
 AGAGAATGCTCTTCCTCTTGTTCCCTCCCATGCTCTTGTTCTGGCCA  
 AGAGAATGCTCTTCCTCTTGTTCCCTCCCATGCTCTTGTTCTGGCCA  
 GAGAATGCTCTTCCTCTTGTTCCCTCCCATGCTCTTGTTCTGGCCA  
 GAGAATGCTCTTCCTCTTGTTCCCTCCCATGCTCTTGTTCTGGCCA  
 AGAATGCTCTTCCTCTTGTTCCCTCCCATGCTCTTGTTCTGGCCA  
 AGAATGCTCTTCCTCTTGTTCCCTCCCATGCTCTTGTTCTGGCCA  
 AGAATGCTCTTCCTCTTGTTCCCTCCCATGCTCTTGTTCTGGCCA  
 GAATGCTCTTCCTCTTGTTCCCTCCCATGCTCTTGTTCTGGCCA  
 GAATGCTCTTCCTCTTGTTCCCTCCCATGCTCTTGTTCTGGCCA  
 AATGCTCTTCCTCTTGTTCCCTCCCATGCTCTTGTTCTGGCCA  
 AATGCTCTTCCTCTTGTTCCCTCCCATGCTCTTGTTCTGGCCA  
 AATGCTCTTCCTCTTGTTCCCTCCCATGCTCTTGTTCTGGCCA  
 ATGCTCTTCCTCTTGTTCCCTCCCATGCTCTTGTTCTGGCCA  
 ATGCTCTTCCTCTTGTTCCCTCCCATGCTCTTGTTCTGGCCA  
 ATGCTCTTCCTCTTGTTCCCTCCCATGCTCTTGTTCTGGCCA  
 GCTCTTCCTCTTGTTCCCTCCCATGCTCTTGTTCTGGCCA  
 CTCTTCCTCTTGTTCCCTCCCATGCTCTTGTTCTGGCCA  
 CTCTTCCTCTTGTTCCCTCCCATGCTCTTGTTCTGGCCA  
 TCTTCCTCTTGTTCCCTCCCATGCTCTTGTTCTGGCCA  
 CTTTCCTCTTGTTCCCTCCCATGCTCTTGTTCTGGCCA  
 TCCTCTTGTTCCCTCCCATGCTCTTGTTCTGGCCA  
 CTCTTGTTCCCTCCCATGCTCTTGTTCTGGCCA  
 CTCTTGTTCCCTCCCATGCTCTTGTTCTGGCCA  
 CTCTTGTTCCCTCCCATGCTCTTGTTCTGGCCA  
 TCTTGTTCCCTCCCATGCTCTTGTTCTGGCCA  
 CTTGTTCCCTCCCATGCTCTTGTTCTGGCCA  
 CTTGTTCCCTCCCATGCTCTTGTTCTGGCCA  
 TGTTCCTCCCATGCTCTTGTTCTGGCCA  
 TGTTCCTCCCATGCTCTTGTTCTGGCCA  
 GTTCCTCCCATGCTCTTGTTCTGGCCA  
 GTTCCTCCCATGCTCTTGTTCTGGCCA  
 GTTCCTCCCATGCTCTTGTTCTGGCCA  
 GTTCCTCCCATGCTCTTGTTCTGGCCA  
 TCCCTCCCATGCTCTTGTTCTGGCCA  
 TCCCATGCTCTTGTTCTGGCCA  
 CCCATGCTCTTGTTCTGGCCA  
 CCCATGCTCTTGTTCTGGCCA  
 TGCTCTTGTTCTGGCCA  
 CTCTTGTTCTGGCCA  
 TCTTGTTCTGGCCA  
 TCTTGTTCTGGCCA  
 CTTGTTCTGGCCA  
 CTTGTTCTGGCCA  
 TTGTTCTGGCCA  
 TTGTTCTGGCCA  
 TGTTCTGGCCA  
 TGTTCTGGCCA  
 TGTTCTGGCCA  
 TGTTCTGGCCA  
 TGTTCTGGCCA  
 GTTCTGGCCA  
 TTCTGGCCA  
 TCTGGCCA  
 TCTGGCCA  
 CTGGCCA  
 GGCCA  
 GGCCA  
 GGCCA  
 CA  
 A

consensus

CTTTTCAGGAATCAAGAGAATGCTCTTCCTCTTGTTCCCTCCCATGCTCTTGTTCTGGCCA

. : . : . : . : . :  
 SRR765711.70787159.1+ G  
 SRR747825.25077350.1+ GC  
 SRR765714.90251705.1- GCTT  
 SRR765715.41596894.1- GCTT  
 SRR765711.81304240.1+ GCTTG  
 SRR765712.80351652.1+ GCTTG  
 SRR747825.15514581.2+ GCTTGC  
 SRR747825.2399014.1+ GCTTGC  
 SRR747825.32125711.2+ GCTTGC  
 SRR747825.34186382.2+ GCTTGC  
 SRR747825.36676712.1+ GCTTGC  
 SRR747825.36796222.1+ GCTTGC  
 SRR747825.37802110.2+ GCTTGC  
 SRR747825.41358891.2+ GCTTGC  
 SRR747825.42101809.1+ GCTTGC  
 SRR747825.42675926.1+ GCTTGC  
 SRR747825.7479104.2+ GCTTGC  
 SRR747825.9216947.2+ GCTTGC  
 SRR765710.77934178.2+ GCTTGC  
 SRR765711.42060791.1+ GCTTGC

SRR765709.89392740.2- GCTTGCATC  
SRR765711.58856886.1- GCTTGCATC  
SRR765714.15028586.1- GCTTGCATC  
SRR765712.223930320.2- GCTTGCATCT  
SRR765716.250216.2- GCTTGCATCT  
SRR765716.25173572.2- GCTTGCATCT  
SRR765716.26119942.2- GCTTGCATCT  
SRR765710.48848881.2+ GCTTGCATCTCT  
SRR765710.83849557.1- GCTTGCATCTCTGC  
SRR765710.62324211.1- GCTTGCATCTCTGCT  
SRR765709.27281621.2- GCTTGCATCTCTGCTG  
SRR765711.127108613.1- GCTTGCATCTCTGCTG  
SRR765714.92358977.1+ GCTTGCATCTCTGCTGC  
SRR765716.23347563.1+ GCTTGCATCTCTGCTGC  
SRR765710.52899931.1- GCTTGCATCTCTGCTGCT  
SRR765710.53338134.1+ GCTTGCATCTCTGCTGCT  
SRR765711.41431931.1+ GCTTGCATCTCTGCTGCT  
SRR765712.225295283.2- GCTTGCATCTCTGCTGCT  
SRR765712.73551137.1+ GCTTGCATCTCTGCTGCTG  
SRR765712.201848235.1- GCTTGCATCTCTGCTGCTGAG  
SRR765710.72900439.1- GCTTGCATCTCTGCTGCTGAGT  
SRR765711.120800792.2+ GCTTGCATCTCTGCTGCTGAGT  
SRR765711.93189275.2- GCTTGCATCTCTGCTGCTGAGT  
SRR765712.108514153.1- GCTTGCATCTCTGCTGCTGAGTT  
SRR765714.45571282.1- GCTTGCATCTCTGCTGCTGAGTT  
SRR765714.123035075.2- GCTTGCATCTCTGCTGCTGAGTTT  
SRR765714.162066143.2+ GCTTGCATCTCTGCTGCTGAGTTT  
SRR765711.13528758.1+ GCTTGCATCTCTGCTGCTGAGTTTC  
SRR765711.43336047.2- GCTTGCATCTCTGCTGCTGAGTTTC  
SRR765711.50432206.2+ GCTTGCATCTCTGCTGCTGAGTTTC  
SRR765714.12218431.2+ GCTTGCATCTCTGCTGCTGAGTTTCC  
SRR765709.5623476.2+ GCTTGCATCTCTGCTGCTGAGTTTCCC  
SRR765711.98788597.2- GCTTGCATCTCTGCTGCTGAGTTTCCC  
SRR765712.9126008.1- GCTTGCATCTCTGCTGCTGAGTTTCCC  
SRR765710.6314.1- GCTTGCATCTCTGCTGCTGAGTTTCCCC  
SRR765710.14520134.1- GCTTGCATCTCTGCTGCTGAGTTTCCCCA  
SRR765715.22238685.1- GCTTGCATCTCTGCTGCTGAGTTTCCCCA  
SRR765715.22238685.2+ GCTTGCATCTCTGCTGCTGAGTTTCCCCA  
SRR765715.3175093.1- GCTTGCATCTCTGCTGCTGAGTTTCCCCA  
SRR765715.3175093.2+ GCTTGCATCTCTGCTGCTGAGTTTCCCCA  
SRR765709.16812281.2- GCTTGCATCTCTGCTGCTGAGTTTCCCCAC  
SRR765711.96129668.1- GCTTGCATCTCTGCTGCTGAGTTTCCCCAC  
SRR765716.28097872.2+ GCTTGCATCTCTGCTGCTGAGTTTCCCCAC  
SRR765714.181565026.1+ GCTTGCATCTCTGCTGCTGAGTTTCCCCACC  
SRR765710.48969246.2- GCTTGCATCTCTGCTGCTGAGTTTCCCCACCCT  
SRR765711.15445266.2+ GCTTGCATCTCTGCTGCTGAGTTTCCCCACCCTT  
SRR765712.227153236.2- GCTTGCATCTCTGCTGCTGAGTTTCCCCACCCTT  
SRR765711.136914716.2- GCTTGCATCTCTGCTGCTGAGTTTCCCCACCCTTC  
SRR765714.73397308.2- GCTTGCATCTCTGCTGCTGAGTTTCCCCACCCTTCC  
SRR765714.76267865.2+ GCTTGCATCTCTGCTGCTGAGTTTCCCCACCCTTCC  
SRR765709.80799489.2+ GCTTGCATCTCTGCTGCTGAGTTTCCCCACCCTTCCCT  
SRR765711.27058616.2- GCTTGCATCTCTGCTGCTGAGTTTCCCCACCCTTCCCTG  
SRR765712.208044178.1+ GCTTGCATCTCTGCTGCTGAGTTTCCCCACCCTTCCCTG  
SRR765710.52432273.2- GCTTGCATCTCTGCTGCTGAGTTTCCCCACCCTTCCCTGG  
SRR765711.39985328.2- GCTTGCATCTCTGCTGCTGAGTTTCCCCACCCTTCCCTGG  
SRR765712.22158653.2+ GCTTGCATCTCTGCTGCTGAGTTTCCCCACCCTTCCCTGG  
SRR765711.141606739.2- GCTTGCATCTCTGCTGCTGAGTTTCCCCACCCTTCCCTGGA  
SRR765712.29757431.1+ GCTTGCATCTCTGCTGCTGAGTTTCCCCACCCTTCCCTGGA  
SRR765712.71088928.1+ GCTTGCATCTCTGCTGCTGAGTTTCCCCACCCTTCCCTGGAT  
SRR765715.19822467.1+ GCTTGCATCTGCTGCTGCTGAGTTTCCCCACCCTTCCCTGGATC  
SRR765715.4936771.1+ GCTTGCATCTCTGCTGCTGAGTTTCCCCACCCTTCCCTGGATC  
SRR765716.24592103.2+ GCTTGCATCTCTGCTGCTGAGTTTCCCCACCCTTCCCTGGATC  
SRR765716.287615.2+ GCTTGCATCTCTGCTGCTGAGTTTCCCCACCCTTCCCTGGATC  
SRR765711.57382922.2- GCTTGCATCTCTGCTGCTGAGTTTCCCCACCCTTCCCTGGATCC  
SRR765715.30571678.1+ GCTTGCATCTCTGCTGCTGAGTTTCCCCACCCTTCCCTGGATCCCT  
SRR765715.36409904.1+ GCTTGCATCTCTGCTGCTGAGTTTCCCCACCCTTCCCTGGATCCCT  
SRR765711.9180360.2+ GCTTGCATCTCTGCTGCTGAGTTTCCCCACCCTTCCCTGGATCCCTTCC  
SRR765712.44471210.1- GCTTGCATCTCTGCTGCTGAGTTTCCCCACCCTTCCCTGGATCCCTTCC  
SRR765711.125009762.1- GCTTGCATCTCTGCTGCTGAGTTTCCCCACCCTTCCCTGGATCCCTTCCA  
SRR765711.76231448.2- GCTTGCATCTCTGCTGCTGAGTTTCCCCACCCTTCCCTGGATCCCTTCCA  
SRR765712.57478692.2+ GCTTGCATCTCTGCTGCTGAGTTTCCCCACCCTTCCCTGGATCCCTTCCA  
SRR765712.73886187.2+ GCTTGCATCTCTGCTGCTGAGTTTCCCCACCCTTCCCTGGATCCCTTCCA  
SRR765712.15635258.2+ GCTTGCATCTCTGCTGCTGAGTTTCCCCACCCTTCCCTGGATCCCTTCCAG  
SRR765712.178874795.2- GCTTGCATCTCTGCTGCTGAGTTTCCCCACCCTTCCCTGGATCCCTTCCAG  
SRR765712.165805728.2+ GCTTGCATCTCTGCTGCTGAGTTTCCCCACCCTTCCCTGGATCCCTTCCAGCA  
SRR765710.11930567.1+ GCTTGCATCTCTGCTGCTGAGTTTCCCCACCCTTCCCTGGATCCCTTCCAGCAT  
SRR765710.46047202.2+ GCTTGCATCTCTGCTGCTGAGTTTCCCCACCCTTCCCTGGATCCCTTCCAGCATG  
SRR765711.65007596.2- GCTTGCATCTCTGCTGCTGAGTTTCCCCACCCTTCCCTGGATCCCTTCCAGCATG  
SRR765712.58838374.2+ GCTTGCATCTCTGCTGCTGAGTTTCCCCACCCTTCCCTGGATCCCTTCCAGCATG  
SRR765714.149627387.1+ GCTTGCATCTCTGCTGCTGAGTTTCCCCACCCTTCCCTGGATCCCTTCCAGCATG  
SRR765710.20061203.2- GCTTGCATCTCTGCTGCTGAGTTTCCCCACCCTTCCCTGGATCCCTTCCAGCATGT  
SRR765712.126177480.1+ GCTTGCATCTCTGCTGCTGAGTTTCCCCACCCTTCCCTGGATCCCTTCCAGCATGT  
SRR765712.21952163.1+ GCTTGCATCTCTGCTGCTGAGTTTCCCCACCCTTCCCTGGATCCCTTCCAGCATGT  
SRR765714.11920695.2+ GCTTGCATCTCTGCTGCTGAGTTTCCCCACCCTTCCCTGGATCCCTTCCAGCATGTT

SRR765711.58178683.1- GCTTGCATCTCTGCTGCTGAGTTTTCCCACCTTCTGGATCCTTCCAGCATGTTCT  
SRR765711.116926262.1- GCTTGCATCTCTGCTGCTGAGTTTTCCCACCTTCTGGATCCTTCCAGCATGTTCT  
SRR765712.152915721.1+ GCTTGCATCTCTGCTGCTGAGTTTTCCCACCTTCTGGATCCTTCCAGCATGTTCT  
SRR765711.75336142.2- GCTTGCATCTCTGCTGCTGAGTTTTCCCACCTTCTGGATCCTTCCAGCTTGTCTA  
SRR765712.102108300.2- GCTTGCATCTCTGCTGCTGAGTTTTCCCACCTTCTGGATCCTTCCAGCATGTTCTA  
SRR765712.117148243.2+ GCTTGCATCTCTGCTGCTGAGTTTTCCCACCTTCTGGATCCTTCCAGCATGTTCTA  
SRR765713.24757498.1+ GCTTGCATCTCTGCTGCTGAGTTTTCCCACCTTCTGGATCCTTCCAGCATGTTCTA  
SRR765711.117156605.2+ GCTTGCATCTCTGCTGCTGAGTTTTCCCACCTTCTGGATCCTTCCAGCATGTTCTAC  
SRR765709.13162642.2+ GCTTGCATCTCTGCTGCTGAGTTTTCCCACCTTCTGGATCCTTCCAGCATGTTCTACC  
SRR765712.170972669.1- GCTTGCATCTCTGCTGCTGAGTTTTCCCACCTTCTGGATCCTTCCAGCATGTTCTACC  
SRR765712.232059580.1+ GCTTGCATCTCTGCTGCTGAGTTTTCCCACCTTCTGGATCCTTCCAGCATGTTCTACC  
SRR765709.26128387.2+ GCTTGCATCTCTGCTGCTGAGTTTTCCCACCTTCTGGATCCTTCCAGCATGTTCTACC  
SRR765710.1716354.2+ GCTTGCATCTCTGCTGCTGAGTTTTCCCACCTTCTGGATCCTTCCAGCATGTTCTACC  
SRR765710.29061231.2+ GCTTGCATCTCTGCTGCTGAGTTTTCCCACCTTCTGGATCCTTCCAGCATGTTCTACC  
SRR765710.48848881.1- GCTTGCATCTCTGCTGCTGAGTTTTCCCACCTTCTGGATCCTTCCAGCATGTTCTACC  
SRR765710.53338134.2- GCTTGCATCTCTGCTGCTGAGTTTTCCCACCTTCTGGATCCTTCCAGCATGTTCTACC  
SRR765710.6874784.1- GCTTGCATCTCTGCTGCTGAGTTTTCCCACCTTCTGGATCCTTCCAGCATGTTCTACC  
SRR765710.77934178.1- GCTTGCATCTCTGCTGCTGAGTTTTCCCACCTTCTGGATCCTTCCAGCATGTTCTACC  
SRR765711.115303767.2- GCTTGCATCTCTGCTGCTGAGTTTTCCCACCTTCTGGATCCTTCCAGCATGTTCTACC  
SRR765711.120800792.1- GCTTGCATCTCTGCTGCTGAGTTTTCCCACCTTCTGGATCCTTCCAGCATGTTCTACC  
SRR765711.136262268.2- GCTTGCATCTCTGCTGCTGAGTTTTCCCACCTTCTGGATCCTTCCAGCATGTTCTACC  
SRR765711.15546394.2+ GCTTGCATCTCTGCTGCTGAGTTTTCCCACCTTCTGGATCCTTCCAGCATGTTCTACC  
SRR765711.31552385.1+ GCTTGCATCTCTGCTGCTGAGTTTTCCCACCTTCTGGATCCTTCCAGCATGTTCTACC  
SRR765711.39537275.1- GCTTGCATCTCTGCTGCTGAGTTTTCCCACCTTCTGGATCCTTCCAGCATGTTCTACC  
SRR765711.39834426.2+ GCTTGCATCTCTGCTGCTGAGTTTTCCCACCTTCTGGATCCTTCCAGCATGTTCTACC  
SRR765711.42060791.2- GCTTGCATCTCTGCTGCTGAGTTTTCCCACCTTCTGGATCCTTCCAGCATGTTCTACC  
SRR765711.70787159.2- GCTTGCATCTCTGCTGCTGAGTTTTCCCACCTTCTGGATCCTTCCAGCATGTTCTACC  
SRR765711.75189809.2- GCTTGCATCTCTGCTGCTGAGTTTTCCCACCTTCTGGATCCTTCCAGCATGTTCTACC  
SRR765711.79688649.2- GCTTGCATCTCTGCTGCTGAGTTTTCCCACCTTCTGGATCCTTCCAGCATGTTCTACC  
SRR765711.81304240.2- GCTTGCATCTCTGCTGCTGAGTTTTCCCACCTTCTGGATCCTTCCAGCATGTTCTACC  
SRR765711.83011887.1+ GCTTGCATCTCTGCTGCTGAGTTTTCCCACCTTCTGGATCCTTCCAGCATGTTCTACC  
SRR765711.90300589.1- GCTTGCATCTCTGCTGCTGAGTTTTCCCACCTTCTGGATCCTTCCAGCATGTTCTACC  
SRR765711.92360717.1+ GCTGGCATCTCTGCTGCTGCGTTTTCCCTACCTTCTGGATCCTTACAGCATGTTCTACC  
SRR765712.106710182.2- GCTTGCATCTCTGCTGCTGAGTTTTCCCACCTTCTGGATCCTTCCAGCATGTTCTACC  
SRR765712.11807389.1+ GCTTGCATCTCTGCTGCTGAGTTTTCCCACCTTCTGGATCCTTCCAGCATGTTCTACC  
SRR765712.166853237.2- GCTTGCATCTCTGCTGCTGAGTTTTCCCACCTTCTGGATCCTTCCAGCATGTTCTACC  
SRR765712.179891936.1+ GCTTGCATCTCTGCTGCTGAGTTTTCCCACCTTCTGGATCCTTCCAGCATGTTCTACC  
SRR765712.203325839.1+ GCTTGCATCTCTGCTGCTGAGTTTTCCCACCTTCTGGATCCTTCCAGCATGTTCTACC  
SRR765712.21124108.2+ GCTTGCATCTCTGCTGCTGAGTTTTCCCACCTTCTGGATCCTTCCAGCATGTTCTACC  
SRR765712.228231813.2+ GCTTGCATCTCTGCTGCTGAGTTTTCCCACCTTCTGGATCCTTCCAGCATGTTCTACC  
SRR765712.29757431.2- GCTTGCATCTCTGCTGCTGAGTTTTCCCACCTTCTGGATCCTTCCAGCATGTTCTACC  
SRR765712.46974017.1+ GCTTGCATCTCTGCTGCTGAGTTTTCCCACCTTCTGGATCCTTCCAGCATGTTCTACC  
SRR765712.73428311.1- GCTTGCATCTCTGCTGCTGAGTTTTCCCACCTTCTGGATCCTTCCAGCATGTTCTACC  
SRR765712.76576490.1+ GCTTGCATCTCTGCTGCTGAGTTTTCCCACCTTCTGGATCCTTCCAGCATGTTCTACC  
SRR765713.15891820.1- GCTTGCATCTCTGCTGCTGAGTTTTCCCACCTTCTGGATCCTTCCAGCATGTTCTACC  
SRR765714.149230942.1+ GCTTGCATCTCTGCTGCTGAGTTTTCCCACCTTCTGGATCCTTCCAGCATGTTCTACC  
SRR765714.39979308.2- GCTTGCATCTCTGCTGCTGAGTTTTCCCACCTTCTGGATCCTTCCAGCATGTTCTACC  
SRR765715.15378963.1+ GCTTGCATCTCTGCTGCTGAGTTTTCCCACCTTCTGGATCCTTCCAGCATGTTCTACC  
SRR765715.22812006.1- GCTTGCATCTCTGCTGCTGAGTTTTCCCACCTTCTGGATCCTTCCAGCATGTTCTACC  
SRR765715.46017009.2+ GCTTGCATCTCTGCTGCTGAGTTTTCCCACCTTCTGGATCCTTCCAGCATGTTCTACC  
SRR765716.12328120.2+ GCTTGCATCTCTGCTGCTGAGTTTTCCCACCTTCTGGATCCTTCCAGCATGTTCTACC  
SRR765716.14688142.2+ GCTTGCATCTCTGCTGCTGAGTTTTCCCACCTTCTGGATCCTTCCAGCATGTTCTACC  
SRR765716.19440677.2+ GCTTGCATCTCTGCTGCTGAGTTTTCCCACCTTCTGGATCCTTCCAGCATGTTCTACC  
SRR765716.25986022.2+ GCTTGCATCTCTGCTGCTGAGTTTTCCCACCTTCTGGATCCTTCCAGCATGTTCTACC  
SRR765714.68056853.2- CTTGCATCTCTGCTGCTGAGTTTTCCCACCTTCTGGATCCTTCCAGCATGTTCTACC  
SRR765714.88849388.2- CTTGCATCTCTGCTGCTGAGTTTTCCCACCTTCTGGATCCTTCCAGCATGTTCTACC  
SRR765710.78316546.1+ ATCTCTGCTGCTGAGTTTTCCCACCTTCTGGATCCTTCCAGCATGTTCTACC  
SRR765711.42145081.2+ ATCTCTGCTGCTGAGTTTTCCCACCTTCTGGATCCTTCCAGCATGTTCTACC  
SRR765711.50432206.1- ATCTCTGCTGCTGAGTTTTCCCACCTTCTGGATCCTTCCAGCATGTTCTACC  
SRR765713.12243610.2+ ATCTCTGCTGCTGAGTTTTCCCACCTTCTGGATCCTTCCAGCATGTTCTACC  
SRR765714.142532987.2+ ATCTCTGCTGCTGAGTTTTCCCACCTTCTGGATCCTTCCAGCATGTTCTACC  
SRR765714.54269538.2+ ATCTCTGCTGCTGAGTTTTCCCACCTTCTGGATCCTTCCAGCATGTTCTACC  
SRR765714.55316615.2+ ATCTCTGCTGCTGAGTTTTCCCACCTTCTGGATCCTTCCAGCATGTTCTACC  
SRR765712.25672489.1+ TCTCTGCTGCTGAGTTTTCCCACCTTCTGGATCCTTCCAGCATGTTCTACC  
SRR765712.73551137.2- TCTCTGCTGCTGAGTTTTCCCACCTTCTGGATCCTTCCAGCATGTTCTACC  
SRR765711.51569470.1+ CTCTGCTGCTGAGTTTTCCCACCTTCTGGATCCTTCCAGCATGTTCTACC  
SRR765712.139323924.1+ CTCTGCTGCTGAGTTTTCCCACCTTCTGGATCCTTCCAGCATGTTCTACC  
SRR765714.88899945.1+ CTCTGCTGCTGAGTTTTCCCACCTTCTGGATCCTTCCAGCATGTTCTACC  
SRR765713.15730043.1- TCTGCTGCTGAGTTTTCCCACCTTCCGGATCCTTCCAGCATGTTCTACC  
SRR765712.27955158.1+ TGCTGCTGAGTTTTCCCACCTTCTGGATCCTTCCAGCATGTTCTACC  
SRR765709.3017797.2+ TGCTGAGTTTTCCCACCTTCTGGATCCTTCCAGCATGTTCTACC  
SRR765709.15051614.1- GCTGAGTTTTCCCACCTTCTGGATCCTTCCAGCATGTTCTACC  
SRR765709.56879908.1- GCTGAGTTTTCCCACCTTCTGGATCCTTCCAGCATGTTCTACC  
SRR765711.15445266.1- GCTGAGTTTTCCCACCTTCTGGATCCTTCCAGCATGTTCTACC  
SRR765714.45211402.1+ GCTGAGTTTTCCCACCTTCTGGATCCTTCCAGCATGTTCTACC  
SRR765714.71098406.2- CTGAGTTTTCCCACCTTCTGGATCCTTCCAGCATGTTCTACC  
SRR765714.126051084.2- TGAGTTTTCCCACCTTCTGGATCCTTCCAGCATGTTCTACC  
SRR765710.11110602.1+ GAGTTTTCCCACCTTCTGGATCCTTCCAGCATGTTCTACC  
SRR765715.11770606.2- AGTTTTCCCACCTTCTGGATCCTTCCAGCATGTTCTACC  
SRR765715.41985107.2- AGTTTTCCCACCTTCTGGATCCTTCCAGCATGTTCTACC  
SRR765710.66135762.2+ GTTTTCCCACCTTCTGGATCCTTCCAGCATGTTCTACC  
SRR765714.103329039.2+ GTTTCCCACCTTCTGGATCCTTCCAGCATGTTCTACC  
SRR765710.11930567.2- TTTCCCACCTTCTGGATCCTTCCAGCATGTTCTACC  
SRR765709.44632583.2+ CTTGCATCTCTGCTGCTGAGTTTTCCCACCTTCTGGATCCTTCCAGCATGTTCTACC

SRR765712.117148243.1- CCCACCTTCCTGGATCCTTCCAGCATGTTCTACCT  
SRR765715.5481277.1+ CCCACCTTCCTGGATCCTTCCAGCATGTTCTACCT  
SRR765712.208044178.2- CACCTTCCTGGATCCTTCCAGCATGTTCTACCT  
SRR765712.165805728.1- CCTTCCTGGATCCTTCCAGCATGTTCTACCT  
SRR765712.21124108.1- CCTTCCTGGATCCTTCCAGCATGTTCTACCT  
SRR765712.71088928.2- CCTTCCTGGATCCTTCCAGCATGTTCTACCT  
SRR765710.1716354.1- CTTCCTGGATCCTTCCAGCATGTTCTACCT  
SRR765715.16262666.1+ CTTTCCTGGATCCTTCCAGCATGTTCTACCT  
SRR765715.18589469.1+ CTTTCCTGGATCCTTCCAGCATGTTCTACCT  
SRR765712.15635258.1- TTCTTCGGATCCTTCCAGCATGTTCTACCT  
SRR765711.117156605.1- TCCTGGATCCTTCCAGCATGTTCTACCT  
SRR765712.21952163.2- TCCTGGATCCTTCCAGCATGTTCTACCT  
SRR765709.17947042.2- CCTGGATCCTTCCAGCATGTTCTACCT  
SRR765712.173925922.1+ CCTGGATCCTTCCAGCATGTTCTACCT  
SRR765715.19898449.2- GGATCCTTCCAGCATGTTCTACCT  
SRR765715.28871379.2- GGATCCTTCCAGCATGTTCTACCT  
SRR765710.14715271.1+ ATCCTTCCAGCATGTTCTACCT  
SRR765712.165744054.2+ ATCCTTCCAGCATGTTCTACCT  
SRR765712.73886187.1- ATCCTTCCAGCATGTTCTACCT  
SRR765711.9180360.1- CCTTCCAGCATGTTCTACCT  
SRR765712.88008628.1+ CTTCCAGCATGTTCTACCT  
SRR765712.125893357.1+ TCCAGCATGTTCTACCT  
SRR765712.138777141.2+ TCCAGCATGTTCTACCT  
SRR765712.228231813.1- TCCAGCATGTTCTACCT  
SRR765711.125330306.2+ CCAGCATGTTCTACCT  
SRR765712.126177480.2- CCAGCATGTTCTACCT  
SRR765712.232059580.2- CCAGCATGTTCTACCT  
SRR765712.57478692.1- CCAGCATGTTCTACCT  
SRR765715.27991329.2+ CCAGCATGTTCTACCT  
SRR765715.48806277.2+ CCAGCATGTTCTACCT  
SRR765709.21897156.1+ CAGCATGTTCTACCT  
SRR765712.22158653.1- GCATGTTCTACCT  
SRR765713.31177874.1+ CATGTTCTACCT  
SRR765712.136103372.2+ ATGTTCTACCT  
SRR765712.58838374.1- ATGTTCTACCT  
SRR765712.152915721.2- GTTCTACCT  
SRR765712.43404440.1+ GTTCTACCT  
SRR765709.5623476.1- TTCTACCT  
SRR765711.15546394.1- TTCTGCCT  
SRR765711.51569470.2- TTCTACCT  
SRR765712.195958303.1- TTCTACCT  
SRR765713.39071978.2- TCCTACCT  
SRR765712.11807389.2- TACCT  
SRR765712.99870371.1+ TACCT  
SRR765712.46974017.2- CCT  
SRR765712.203325839.2- CT  
SRR765709.80799489.1- T

consensus

GCTTGCATCTCTGCTGCTGAGTTTTCCACCTTCCTGGATCCTTCCAGCATGTTCTACCT

SRR765711.136262268.2- CC  
SRR765714.39979308.2- CC  
SRR765710.1716354.2+ CCG  
SRR765715.15378963.1+ CCGC  
SRR765711.75189809.2- CCGCT  
SRR765712.106710182.2- CCGCTGG  
SRR765712.11807389.1+ CCGCTGGCA  
SRR765714.149230942.1+ CCGCTGGCA  
SRR765715.22812006.1- CCGCTGGCACT  
SRR765710.6874784.1- CCGCTGGCACT  
SRR765711.39537275.1- CCGCTGGCACTAT  
SRR765711.90300589.1- CCGCTGGCACTAT  
SRR765712.166853237.2- CCGCTGGCACTATA  
SRR765711.15546394.2+ CCGCGGGCACTATA  
SRR765711.92360717.1+ CCGCTGGCACTATAAG  
SRR765710.77934178.1- CCGCTGGCACTATAAGGAA  
SRR765712.179891936.1+ CCGCTGGCACTATAAGGAA  
SRR765714.71098406.2- CCGCTGGCACTATAAGGAA  
SRR765711.42060791.2- CCGCTGGCACTATAAGGAA  
SRR765711.70787159.2- CCGCTGGCACTATAAGGAA  
SRR765712.203325839.1+ CCGCTGGCACTATAAGGAA  
SRR765710.48848881.1- CCGCTGGCACTATAAGGAA  
SRR765711.83011887.1+ CCGCTGGCACTATAAGGAA  
SRR765712.46974017.1+ CCGCTGGCACTATAAGGAA  
SRR765709.26128387.2+ CCGCTGGCACTATAAGGAA  
SRR765710.29061231.2+ CCGCTGGCACTATAAGGAA  
SRR765716.12328120.2+ CCGCTGGCGCTATAAGGAA  
SRR765716.14688142.2+ CCGCTGGCACTATAAGGAA  
SRR765716.19440677.2+ CCGCTGGCACTATAAGGAA  
SRR765716.25986022.2+ CCGCTGGCACTATAAGGAA  
SRR765711.31552385.1+ CCGCTGGCACTATAAGGAA  
SRR765711.120800792.1- CCGCTGGCACTATAAGGAA  
SRR765713.15891820.1- CCGCTGGCACTATAAGGAA





SRR765713.24490767.2- CGCTGGCACTATAAGGAACAGGAGCTGATGGGGTTGAGCTGCACATCCACACAATTGGC  
SRR765713.901098.2- CGCTGGCACTATAAGGAACAGGAGCTGATGGGGTTGAGCTGCACATCCACACAATTGGC  
SRR765714.106732036.2- CGCTGGCACTATAAGGAACAGGAGCTGATGGGGTTGAGCTGCACATCCACACAATTGGC  
SRR765709.27935475.2+ GCTGGCACTATAAGGAACAGGAGCTGATGGGGTTGAGCTGCACATCCACACAATTGGC  
SRR765710.12300792.2+ GCTGGCACTATAAGGAACAGGAGCTGATGGGGTTGAGCTGCACATCCACACAATTGGC  
SRR765711.92360717.2- GCTGGCACTATAAGGAACAGGAGCTGATGGGGTTGAGCTGCACATCCACACAATTGGC  
SRR765712.183278959.1+ TGGCACTATAAGGAACAGGAGCTGATGGGGTTGAGCTGCACATCCACACAATTGGC  
SRR765713.30731876.1- TGGCACTATAAGGAACAGGAGCTGATGGGGTTGAGCTGCACATCCACACAATTGGC  
SRR765714.180169356.1- TGGCACTATAAGGAACAGGAGCTGATGGGGTTGAGCTGCACATCCACACAATTGGC  
SRR765714.30609878.1+ TGGCACTATAAGGAACAGGAGCTGATGGGGTTGAGCTGCACATCCACACAATTGGC  
SRR765712.125325157.1+ GGCACATAAGGAACAGGAGCTGATGGGGTTGAGCTGCACATCCACACAATTGGC  
SRR765714.154250096.1- GCACATAAGGAACAGGAGCTGATGGGGTTGAGCTGCACATCCACACAATTGGC  
SRR765712.179891936.2- CACTATAAGGAACAGGAGCTGATGGGGTTGAGCTGCACATCCACACAATTGGC  
SRR765709.82540197.1+ ACTATAAGGAACAGGAGCTGATGGGGTTGAGCTGCACATCCACACAATTGGC  
SRR765710.29061231.1- ACTATAAGGAACAGGAGCTGATGGGGTTGAGCTGCACATCCACACAATTGGC  
SRR765712.158301577.1+ ACTATAAGGAACAGGAGCTGATGGGGTTGAGCTGCACATCCACACAATTGGC  
SRR765714.129507513.1+ CTATAAGGAACAGGAGCTGATGGGGTTGAGCTGCACATCCACACAATTGGC  
SRR765714.140601593.2+ CTATAAGGAACAGGAGCTGATGGGGTTGAGCTGCACATCCACACAATTGGC  
SRR765714.168159457.1+ CTATAAGGAACAGGAGCTGATGGGGTTGAGCTGCACATCCACACAATTGGC  
SRR765715.31628901.1+ TATAAGGAACAGGAGCTGATGGGGTTGAGCTGCACATCCACACAATTGGC  
SRR765715.45770009.1+ TATAAGGAACAGGAGCTGATGGGGTTGAGCTGCACATCCACACAATTGGC  
SRR765709.85918077.1+ ATAAAGGAACAGGAGCTGATGGGGTTGAGCTGCACATCCACACAATTGGC  
SRR765712.139323924.2- ATAAAGGAACAGGAGCTGATGGGGTTGAGCTGCACATCCACACAATTGGC  
SRR765712.85106693.1+ ATAAAGGAACAGGAGCTGATGGGGTTGAGCTGCACATCCACACAATTGGC  
SRR765712.171142138.1+ TAAGGAACAGGAGCTGATGGGGTTGAGCTGCACATCCACACAATTGGC  
SRR765712.128159580.2+ AGGAACAGGAGCTGATGGGGTTGAGCTGCACATCCACACAATTGGC  
SRR765714.149178143.2- AGGAACAGGAGCTGATGGGGTTGAGCTGCACATCCACACAATTGGC  
SRR765710.73677951.2+ GGAAACAGGAGCTGATGGGGTTGAGCTGCACATCCACACAATTGGC  
SRR765711.125330306.1- AACAGGAGCTGATGGGGTTGAGCTGCACATCCACACAATTGGC  
SRR765711.83011887.2- CAGGAGCTGATGGGGTTGAGCTGCACATCCACACAATTGGC  
SRR765714.149867042.1+ CAGGAGCTGATGGGGTTGAGCTGCACATCCACACAATTGGC  
SRR747825.14576590.2+ AGGAGCTGATGGGGTTGAGCTGCACATCCACACAATTGGC  
SRR747825.14585113.1+ AGGAGCTGATGGGGTTGAGCTGCACATCCACACAATTGGC  
SRR747825.19360308.2+ AGGAGCTGATGGGGTTGAGCTGCACATCCACACAATTGGC  
SRR747825.1972727.1+ AGGAGCTGATGGGGTTGAGCTGCACATCCACACAATTGGC  
SRR747825.21619580.2+ AGGAGCTGATGGGGTTGAGCTGCACATCCACACAATTGGC  
SRR747825.22167783.1+ AGGAGCTGATGGGGTTGAGCTGCACATCCACACAATTGGC  
SRR747825.22770718.1+ AGGAGCTGATGGGGTTGAGCTGCACATCCACACAATTGGC  
SRR747825.26682374.2+ AGGAGCTGATGGGGTTGAGCTGCACATCCACACAATTGGC  
SRR747825.26883748.1+ AGGAGCTGATGGGGTTGAGCTGCACATCCACACAATTGGC  
SRR747825.31272404.2+ AGGAGCTGATGGGGTTGAGCTGCACATCCACACAATTGGC  
SRR747825.33273337.2+ AGGAGCTGATGGGGTTGAGCTGCACATCCACACAATTGGC  
SRR747825.33273338.2+ AGGAGCTGATGGGGTTGAGCTGCACATCCACACAATTGGC  
SRR747825.33533006.2+ AGGAGCTGATGGGGTTGAGCTGCACATCCACACAATTGGC  
SRR747825.35561440.2+ AGGAGCTGATGGGGTTGAGCTGCACATCCACACAATTGGC  
SRR747825.36118365.1+ AGGAGCTGATGGGGTTGAGCTGCACATCCACACAATTGGC  
SRR747825.37409548.2+ AGGAGCTGATGGGGTTGAGCTGCACATCCACACAATTGGC  
SRR747825.3942779.2+ AGGAGCTGATGGGGTTGAGCTGCACATCCACACAATTGGC  
SRR747825.6652060.2+ AGGAGCTGATGGGGTTGAGCTGCACATCCACACAATTGGC  
SRR747825.7537942.2+ AGGAGCTGATGGGGTTGAGCTGCACATCCACACAATTGGC  
SRR747825.8318391.2+ AGGAGCTGATGGGGTTGAGCTGCACATCCACACAATTGGC  
SRR747825.8487474.2+ AGGAGCTGATGGGGTTGAGCTGCACATCCACACAATTGGC  
SRR747825.8731386.1+ AGGAGCTGATGGGGTTGAGCTGCACATCCACACAATTGGC  
SRR765710.27338352.2+ AGGAGCTGATGGGGTTGAGCTGCACATCCACACAATTGGC  
SRR765712.51340874.2+ AGGAGCTGATGGGGTTGAGCTGCACATCCACACAATTGGC  
SRR765712.72190442.2+ AGGAGCTGATGGGGTTGAGCTGCACATCCACACAATTGGC  
SRR765713.33934669.1+ AGGAGCTGATGGGGTTGAGCTGCACATCCACACAATTGGC  
SRR765713.9198519.1+ AGGAGCTGATGGGGTTGAGCTGCACATCCACACAATTGGC  
SRR765714.114351789.1+ AGGAGCTGATGGGGTTGAGCTGCACATCCACACAATTGGC  
SRR765711.13566352.1+ GGAGCTGATGGGGTTGAGCTGCACATCCACACAATTGGC  
SRR765712.76576490.2- GGAGCTGATGGGGTTGAGCTGCACATCCACACAATTGGC  
SRR765711.39834426.1- GAGCTGATGGGGTTGAGCTGCACATCCACACAATTGGC  
SRR765711.79664446.2+ GAGCTGATGGGGTTGAGCTGCACATCCACACAATTGGC  
SRR765709.3017797.1- GCTGATGGGGTTGAGCTGCACATCCACACAATTGGC  
SRR747825.12487751.2- CTGATGGGGTTGAGCTGCACATCCACACAATTGGC  
SRR747825.12965830.2- CTGATGGGGTTGAGCTGCACATCCACACAATTGGC  
SRR747825.14196148.2- CTGATGGGGTTGAGCTGCACATCCACACAATTGGC  
SRR747825.17726022.2- CTGATGGGGTTGAGCTGCACATCCACACAATTGGC  
SRR747825.21410409.2- CTGATGGGGTTGAGCTGCACATCCACACAATTGGC  
SRR747825.26095160.2- CTGATGGGGTTGAGCTGCACATCCACACAATTGGC  
SRR747825.26346030.2- CTGATGGGGTTGAGCTGCACATCCACACAATTGGC  
SRR747825.35226945.2- CTGATGGGGTTGAGCTGCACATCCACACAATTGGC  
SRR747825.36267467.2- CTGATGGGGTTGAGCTGCACATCCACACAATTGGC  
SRR747825.4608608.2- CTGATGGGGTTGAGCTGCACATCCACACAATTGGC  
SRR747825.7988087.2- CTGATGGGGTTGAGCTGCACATCCACACAATTGGC  
SRR747825.8350873.2- CTGATGGGGTTGAGCTGCACATCCACACAATTGGC  
SRR765710.11110602.2- CTGATGGGGTTGAGCTGCACATCCACACAATTGGC  
SRR765714.63395510.2- CTGATGGGGTTGAGCTGCACATCCACACAATTGGC  
SRR765714.82008612.2- CTGATGGGGTTGAGCTGCACATCCACACAATTGGC  
SRR747825.42525078.2- TGATGGGGTTGAGCTGCACATCCACACAATTGGC  
SRR765711.6290287.2+ TGATGGGGTTGAGCTGCACATCCACACAATTGGC  
SRR765712.197777944.1+ TGATGGGGTTGAGCTGCACATCCACACAATTGGC  
SRR765710.78316546.2- GATGGGGTTGAGCTGCACATCCACACAATTGGC  
SRR765709.13217291.1+ ATGGGGTTGAGCTGCACATCCACACAATTGGC

|                        |                                  |
|------------------------|----------------------------------|
| SRR765715.16262666.2-  | ATGGGGTTGAGCTGCACATCCGCACAATTGGC |
| SRR765715.18589469.2-  | ATGGGGTTGAGCTGCACATCCACACAATTGGC |
| SRR765716.10147584.2+  | TGGGGTTGAGCTGCACATCCACACAATTGGC  |
| SRR765716.18110791.2+  | TGGGGTTGAGCTGCACATCCACACAATTGGC  |
| SRR765709.13162642.1-  | GGGGTTGAGCTGCACATCCACACAATTGGC   |
| SRR765710.41723497.1+  | GTTTGGAGCTGCACATCCACACAATTGGC    |
| SRR765714.77066962.1+  | GTTTGGAGCTGCACATCCACACAATTGGC    |
| SRR765711.31552385.2-  | GTTTGGAGCTGCACATCCACACAATTGGC    |
| SRR765711.35892352.2+  | GTGGAGCTGCACATCCACACAATTGGC      |
| SRR765714.181917353.1- | GTTTGGAGCTGCACATCCACACAATTGGC    |
| SRR765714.23956215.1+  | TTGAGCTGCACATCCACACAATTGGC       |
| SRR765710.66135762.1-  | TGAGCTGCACATCCACACGATTGGC        |
| SRR765712.88008628.2-  | GAGCTGCACATCCACACAATTGGC         |
| SRR765711.102739620.2+ | AGCTGCACATCCACACAATTGGC          |
| SRR765714.181600550.1- | AGCTGCACATCCACACAATTGGC          |
| SRR765712.148429673.1+ | GCTGCACATCCACACAATTGGC           |
| SRR765714.178949095.1- | CTGCACATCCACACAATTGGC            |
| SRR765711.56339811.1+  | TGCACATCCACACAATTGGC             |
| SRR765709.40884677.1+  | GCACATCCACACAATTGGC              |
| SRR765712.25672489.2-  | CACATCCACACAATTGGC               |
| SRR765712.220295908.2+ | ACATCCACACAATTGGC                |
| SRR765712.27955158.2-  | ACATCCACACAATTGGC                |
| SRR765712.151632343.1+ | ATCCACACAATTGGC                  |
| SRR765713.8355185.1+   | ATCCACACAATTGGC                  |
| SRR765710.10250671.1+  | CCACACAATTGGC                    |
| SRR765710.6584671.2+   | CACACAATTGGC                     |
| SRR765714.86734657.2-  | ACACAATTGGC                      |
| SRR765712.125893357.2- | CACAATTGGC                       |
| SRR765710.14715271.2-  | ACAATTGGC                        |
| SRR765714.195543010.2- | ACAATTGGC                        |
| SRR765714.43208061.2+  | ACAATTGGC                        |
| SRR765715.27991329.1-  | ACAATTGGC                        |
| SRR765715.48806277.1-  | ACAATTGGC                        |
| SRR765711.42145081.1-  | CAATTGGC                         |
| SRR765712.136103372.1- | CAATTGGC                         |
| SRR765714.102557296.2- | CAATTGGC                         |
| SRR765714.111689744.2- | CAATTGGC                         |
| SRR765709.44632583.1-  | AATTGGC                          |
| SRR765709.62403711.1+  | AATTGGC                          |
| SRR765712.121630012.2+ | AATTGGC                          |
| SRR765712.189246974.2+ | AATTGGC                          |
| SRR765716.13424455.2-  | ATTGGC                           |
| SRR765716.27196679.2-  | ATTGGC                           |
| SRR765716.6716252.2-   | ATTGGC                           |
| SRR765711.55682203.2+  | TGGC                             |
| SRR765714.4956404.2-   | TGGC                             |
| SRR765709.15951076.2+  | GGC                              |
| SRR765709.87544394.2-  | GGC                              |
| SRR765712.173925922.2- | GC                               |
| SRR765716.13051448.2-  | GC                               |

consensus

CCGCTGGCACTATAAGGAACAGGAGCTGATGGGGTTGAGCTGCACATCCACACAATTGGC

|                        |                           |
|------------------------|---------------------------|
| SRR765710.66135762.2+  | T                         |
| SRR765710.11930567.2-  | TGG                       |
| SRR765709.44632583.2+  | TGGGTG                    |
| SRR765712.117148243.1- | TGGGTG                    |
| SRR765715.5481277.1+   | TGGGTG                    |
| SRR765712.208044178.2- | TGGGTGGC                  |
| SRR765712.165805728.1- | TGGGTGGCAC                |
| SRR765712.21124108.1-  | TGGGTGGCAC                |
| SRR765712.71088928.2-  | TGGGTGGCAC                |
| SRR765710.1716354.1-   | TGGGTGGCACA               |
| SRR765715.16262666.1+  | TGGGTGGCACA               |
| SRR765715.18589469.1+  | TGGGTGGCACA               |
| SRR765712.15635258.1-  | TGGGTGGCACAT              |
| SRR765711.117156605.1- | TGGGTGGCACATG             |
| SRR765712.21952163.2-  | TGGGTGGCACATG             |
| SRR765709.17947042.2-  | TGGGTGGCACATGG            |
| SRR765712.173925922.1+ | TGGGTGGCACATGG            |
| SRR765715.19898449.2-  | TGGGTGGCACATGGAGA         |
| SRR765715.28871379.2-  | TGGGTGGCACATGGAGA         |
| SRR765711.92360717.2-  | TGGGTGGCACATGGAGAG        |
| SRR765710.14715271.1+  | TGGGTGGCACATGGAGAGC       |
| SRR765712.165744054.2+ | TGGGTGGCACATGGAGAGC       |
| SRR765712.73886187.1-  | TGGGTGGCACATGGAGAGC       |
| SRR765711.9180360.1-   | TGGGTGGCACATGGAGAGCCCT    |
| SRR765712.88008628.1+  | TGGGTGGCACATGGAGAGCCCT    |
| SRR765712.125893357.1+ | TGGGTGGCACATGGAGAGCCCTCA  |
| SRR765712.138777141.2+ | TGGGTGGCACATGGAGAGCCCTCA  |
| SRR765712.228231813.1- | TGGGTGGCACATGGAGAGCCCTCA  |
| SRR765711.125330306.2+ | TGGGTGGCACATGGAGAGCCCTCAT |
| SRR765712.126177480.2- | TGGGTGGCACATGGAGAGCCCTCAT |

SRR765712.232059580.2- TGGGTGGCACATGGAGAGCCCTCAT  
SRR765712.57478692.1- TGGGTGGCACATGGAGAGCCCTCAT  
SRR765715.27991329.2+ TGGGTGGCACATGGAGAGCCCTCAT  
SRR765715.48806277.2+ TGGGTGGCACATGGAGAGCCCTCAT  
SRR765709.21897156.1+ TGGGTGGCACATGGAGAGCCCTCATG  
SRR765712.22158653.1- TGGGTGGCACATGGAGAGCCCTCATGGA  
SRR765713.31177874.1+ TGGGTGGCACATGGAGAGCCCTCATGGAGA  
SRR765712.136103372.2+ TGGGTGGCACATGGAGAGCCCTCATGGAGA  
SRR765712.58838374.1- TGGGTGGCACATGGAGAGCCCTCATGGAGA  
SRR765712.152915721.2- TGGGTGGCACATGGAGAGCCCTCATGGAGAGC  
SRR765712.43404440.1+ TGGGTGGCACATGGAGAGCCCTCATGGAGAGC  
SRR765709.5623476.1- TGGGTGGCACATGGAGAGCCCTCATGGAGAGCT  
SRR765711.15546394.1- TGGGTGGCACATGGAGAGCCCTCATGGAGAGCT  
SRR765711.51569470.2- TGGGTGGCACATGGAGAGCCCTCATGGAGAGCT  
SRR765712.195958303.1- TGGGTGGCACATGGAGAGCCCTCATGGAGAGCT  
SRR765713.39071978.2- TGGGTGGCACATGGAGAGCCCTCATGGAGAGCT  
SRR765712.11807389.2- TGGGTGGCACATGGAGAGCCCTCATGGAGAGCTGCC  
SRR765712.99870371.1+ TGGGTGGCACATGGAGAGCCCTCATGGAGAGCTGCC  
SRR765712.46974017.2- TGGGTGGCACATGGAGAGCCCTCATGGAGAGCTGCCCTG  
SRR765712.203325839.2- TGGGTGGCACATGGAGAGCCCTCATGGAGAGCTGCCCTGG  
SRR765709.80799489.1- TGGGTGGCACATGGAGAGCCCTCATGGAGAGCTGCCCTGGA  
SRR765713.24490767.2- TGGGTGGCACATGGAGAGCCCTCATGGAGAGCTGCCCTGGAT  
SRR765713.901098.2- TGGGTGGCACATGGAGAGCCCTCATGGAGAGCTGCCCTGGAT  
SRR765714.106732036.2- TGGGTGGCACATGGAGAGCCCTCATGGAGAGCTGCCCTGGAT  
SRR765709.27935475.2+ TGGGTGGCACATGGAGAGCCCTCATGGAGAGCTGCCCTGGATCT  
SRR765710.12300792.2+ TGGGTGGCACATGGAGAGCCCTCATGGAGAGCTGCCCTGGATCT  
SRR765713.30731876.1- TGGGTGGCACATGGAGAGCCCTCATGGAGAGCTGCCCTGGATCTG  
SRR765714.180169356.1- TGGGTGGCACATGGAGAGCCCTCATGGAGAGCTGCCCTGGATCTG  
SRR765714.30609878.1+ TGGGTGGCACATGGAGAGCCCTCATGGAGAGCTGCCCTGGATCTG  
SRR765712.158301577.1+ TGGGTGGCACATGGAGAGCCCTCATGGAGAGCTGCCCTGGATCTGA  
SRR765712.183278959.1+ TGGGTGGCACATGGAGAGCCCTCATGGAGAGCTGCCCTGGATCTGA  
SRR765712.125325157.1+ TGGGTGGCACATGGAGAGCCCTCATGGAGAGCTGCCCTGGATCTGAC  
SRR765714.154250096.1- TGGGTGGCACATGGAGAGCCCTCATGGAGAGCTGCCCTGGATCTGAC  
SRR765712.179891936.2- TGGGTGGCACATGGAGAGCCCTCATGGAGAGCTGCCCTGGATCTGACAC  
SRR765709.82540197.1+ TGGGTGGCACATGGAGAGCCCTCATGGAGAGCTGCCCTGGATCTGACACT  
SRR765710.29061231.1- TGGGTGGCACATGGAGAGCCCTCATGGAGAGCTGCCCTGGATCTGACACT  
SRR765714.129507513.1+ TGGGTGGCACATGGAGAGCCCTCATGGAGAGCTGCCCTGGATCTGACACT  
SRR765714.140601593.2+ TGGGTGGCACATGGAGAGCCCTCATGGAGAGCTGCCCTGGATCTGACACT  
SRR765714.168159457.1+ TGGGTGGCACATGGAGAGCCCTCATGGAGAGCTGCCCTGGATCTGACACT  
SRR765715.45770009.1+ TGGGTGGCACATGGAGAGCCCTCATGGAGAGCTGCCCTGGATCTGACACTG  
SRR765715.31628901.1+ TGGGTGGCACATGGAGAGCCCTCATGGAGAGCTGCCCTGGATCTGACACTGT  
SRR765709.85918077.1+ TGGGTGGCACATGGAGAGCCCTCATGGAGAGCTGCCCTGGATCTGACACTGTG  
SRR765712.139323924.2- TGGGTGGCACATGGAGAGCCCTCATGGAGAGCTGCCCTGGATCTGACACTGTG  
SRR765712.85106693.1+ TGGGTGGCACATGGAGAGCCCTCATGGAGAGCTGCCCTGGATCTGACACTGTG  
SRR747825.3942779.2+ TGGGTGGCACATGGAGAGCCCTCATGGAGAGCAGCCTGGAGCTGACACTGTGT  
SRR765712.171142138.1+ TGGGTGGCACATGGAGAGCCCTCATGGAGAGCTGCCCTGGATCTGACACTGTGT  
SRR765714.149178143.2- TGGGTGGCACATGGAGAGCCCTCATGGAGAGCTGCCCTGGATCTGACACTGTGTGTC  
SRR747825.22167783.1+ TGGGTGGCACATGGAGAGCCCTCATGGAGAGCTGCCCTGGATCTGACACTGTGTGTC  
SRR765712.128159580.2+ TGGGTGGCACATGGAGAGCCCTCATGGAGAGCTGCCCTGGATCTGACACTGTGTGTC  
SRR765710.73677951.2+ TGGGTGGCACATGGAGAGCCCTCATGGAGAGCTGCCCTGGATCTGACACTGTGTGTCAG  
SRR747825.22770718.1+ TGGGTGGCACATGGAGAGCCCTCATGGAGAGCTGCCCTGGATCTGACACTGTGGCAGG  
SRR765714.149867042.1+ TGGGTGGCACATGGAGAGCCCTCATGGAGAGCTGCCCTGGATCTGACACTGTGTGTCAGG  
SRR747825.8487474.2+ TGGGTGGCACATGGAGAGCCCTCATGGAGAGCTGCCCTGGATCTGACACTGTGTGTCAGGA  
SRR765711.125330306.1- TGGGTGGCACATGGAGAGCCCTCATGGAGAGCTGCCCTGGATCTGACACTGTGTGTCAGGA  
SRR747825.19360308.2+ TGGGTGGCACATGGAGAGCCCTCATGGAGAGCTGCCCTGGATCTGACACTGTGGCAGGAG  
SRR747825.26682374.2+ TGGGTGGCACATGGAGAGCCCTCATGGAGAGCTGCCCTGGATCTGACACTGTGTGTCAGGAG  
SRR747825.6652060.2+ TGGGTGGCACATGGAGAGCCCTCATGGAGAGCTGCCCTGGATCTGACACTGTGTGTCAGGAG  
SRR765713.9198519.1+ TGGGTGGCACATGGAGAGCCCTCATGGAGAGCTGCCCTGGATCTGACACTGTGTGTCAGGAG  
SRR747825.12487751.2- TGGGTGGCACATGGAGAGCCCTCATGGAGAGCTGCCCTGGATCTGACACTGTGTGTCAGGAGA  
SRR747825.12965830.2- TGGGTGGCACATGGAGAGCCCTCATGGAGAGCTGCCCTGGATCTGACACTGTGTGTCAGGAGA  
SRR747825.14196148.2- TGGGTGGCACATGGAGAGCCCTCATGGAGAGCTGCCCTGGATCTGACACTGTGTGTCAGGAGA  
SRR747825.14576590.2+ TGGGTGGCACATGGAGAGCCCTCATGGAGAGCTGCCCTGGATCTGACACTGTGTGTCAGGAGA  
SRR747825.14585113.1+ TGGGTGGCACATGGAGAGCCCTCATGGAGAGCTGCCCTGGATCTGACACTGTGTGTCAGGAGA  
SRR747825.17726022.2- TGGGTGGCACATGGAGAGCCCTCATGGAGAGCTGCCCTGGATCTGACACTGTGTGTCAGGAGA  
SRR747825.1972727.1+ TGGGTGGCACATGGAGAGCCCTCATGGAGAGCTGCCCTGGATCTGACACTGTGTGTCAGGAGA  
SRR747825.21410409.2- TGGGTGGCACATGGAGAGCCCTCATGGAGAGCTGCCCTGGATCTGACACTGTGTGTCAGGAGA  
SRR747825.21619580.2+ TGGGTGGCACATGGAGAGCCCTCATGGAGAGCTGCCCTGGATCTGACACTGTGTGTCAGGAGA  
SRR747825.26095160.2- TGGGTGGCACATGGAGAGCCCTCATGGAGAGCTGCCCTGGATCTGACACTGTGTGTCAGGAGA  
SRR747825.26346030.2- TGGGTGGCACATGGAGAGCCCTCATGGAGAGCTGCCCTGGATCTGACACTGTGTGTCAGGAGA  
SRR747825.26883748.1+ TGGGTGGCACATGGAGAGCCCTCATGGAGAGCTGCCCTGGATCTGACACTGTGTGTCAGGAGA  
SRR747825.31272404.2+ TGGGTGGCACATGGAGAGCCCTCATGGAGAGCTGCCCTGGATCTGACACTGTGTGTCAGGAGA  
SRR747825.33273337.2+ TGGGTGGCACATGGAGAGCCCTCATGGAGAGCTGCCCTGGATCTGACACTGTGTGTCAGGAGA  
SRR747825.33273338.2+ TGGGTGGCACATGGAGAGCCCTCATGGAGAGCTGCCCTGGATCTGACACTGTGTGTCAGGAGA  
SRR747825.33533006.2+ TGGGTGGCACATGGAGAGCCCTCATGGAGAGCTGCCCTGGATCTGACACTGTGTGTCAGGAGA  
SRR747825.35226945.2- TGGGTGGCACATGGAGAGCCCTCATGGAGAGCTGCCCTGGATCTGACACTGTGTGTCAGGAGA  
SRR747825.35561440.2+ TGGGTGGCACATGGAGAGCCCTCATGGAGAGCTGCCCTGGATCTGACACTGTGTGTCAGGAGA  
SRR747825.36118365.1+ TGGGTGGCACATGGAGAGCCCTCATGGAGAGCTGCCCTGGATCTGACACTGTGTGTCAGGAGA  
SRR747825.36267467.2- TGGGTGGCACATGGAGAGCCCTCATGGAGAGCTGCCCTGGATCTGACACTGTGTGTCAGGAGA  
SRR747825.37409548.2+ TGGGTGGCACATGGAGAGCCCTCATGGAGAGCTGCCCTGGATCTGACACTGTGTGTCAGGAGA  
SRR747825.42525078.2- TGGGTGGCACATGGAGAGCCCTCATGGAGAGCTGCCCTGGATCTGACACTGTGTGTCAGGAGA  
SRR747825.4608608.2- TGGGTGGCACATGGAGAGCCCTCATGGAGAGCTGCCCTGGATCTGACACTGTGTGTCAGGAGA  
SRR747825.7537942.2+ TGGGTGGCACATGGAGAGCCCTCATGGAGAGCTGCCCTGGATCTGACACTGTGTGTCAGGAGA  
SRR747825.7988087.2- TGGGTGGCACATGGAGAGCCCTCATGGAGAGCTGCCCTGGATCTGACACTGTGTGTCAGGAGA  
SRR747825.8318391.2+ TGGGTGGCACATGGAGAGCCCTCATGGAGAGCTGCCCTGGATCTGACACTGTGTGTCAGGAGA

SRR747825.8350873.2- TGGGTGGCACATGGAGAGCCCTCATGGAGAGCTGCCTGGATCTGACACTGTGTCAGGAGA  
SRR747825.8731386.1+ TGGGTGGCACATGGAGAGCCCTCATGGAGAGCCGCTGGATCTGACACTGTGTCAGGAGA  
SRR765709.13162642.1- TGGGTGGCACATGGAGAGCCCTCATGGAGAGCTGCCTGGATCTGACACTGTGTCAGGAGA  
SRR765709.13217291.1+ TGGGGGGCACATGGAGAGCCCTCATGGAGAGCTACCTGGATCTGACACTGTGTCAGGAGA  
SRR765709.15951076.2+ TGGGTGGCACATGGAGAGCCCTCATGGAGAGCTGCCTGGATCTGACACTGTGTCAGGAGA  
SRR765709.3017797.1- TGGGTGGCACATGGAGAGCCCTCATGGAGAGCTGCCTGGATCTGACACTGTGTCAGGAGA  
SRR765709.40884677.1+ TGGGTGGCACATGGAGAGCCCTCATGGAGAGCTGCCTGGATCTGACACTGTGTCAGGAGA  
SRR765709.44632583.1- TGGGTGGCACATGGAGAGCCCTCATGGAGAGCTGCCTGGATCTGACACTGTGTCAGGAGA  
SRR765709.44907493.2+ TGGGTGGCACATGGAGAGCCCTCATGGAGAGCTGCCTGGATCTGACACTGTGTCAGGAGA  
SRR765709.62403711.1+ TGGGTGGCACATGGAGAGCCCTCATGGAGAGCTGCCTGGATCTGACACTGTGTCAGGAGA  
SRR765709.87544394.2- TGGGTGGCACATGGAGAGCCCTCATGGAGAGCTGCCTGGATCTGACACTGTGTCAGGAGA  
SRR765710.10250671.1+ TGGGTGGCACATGGAGAGCCCTCATGGAGAGCTGCCTGGATCTGACACTGTGTCAGGAGA  
SRR765710.11110602.2- TGGGTGGCACATGGAGAGCCCTCATGGAGAGCTGCCTGGATCTGACACTGTGTCAGGAGA  
SRR765710.14715271.2- TGGGCGGCACATGGAGAGCCCTCATGGAGAGCTGCCTGGATCTGACACTGTGTCAGGAGA  
SRR765710.27338352.2+ TGGGTGGCACATGGAGAGCCCTCATGGAGAGCTGCCTGGATCTGACACTGTGTCAGGAGA  
SRR765710.41723497.1+ TGGGTGGCACATGGAGAGCCCTCATGGAGAGCTGCCTGGATCTGACACTGTGTCAGGAGA  
SRR765710.6584671.2+ TGGGTGGCACATGGAGAGCCCTCATGGAGAGCTGCCTGGATCTGACACTGTGTCAGGAGA  
SRR765710.66135762.1- TGGGTGGCACATGGAGAGCCCTCATGGAGAGCTGCCTGGATCTGACACTGTGTCAGGAGA  
SRR765710.78316546.2- TGGGTGGCACATGGAGAGCCCTCATGGAGAGCTGCCTGGATCTGACACTGTGTCAGGAGA  
SRR765711.102739620.2+ TGGGTGGCACATGGAGAGCCCTCATGGAGAGCTGCCTGGATCTGACACTGTGTCAGGAGA  
SRR765711.13566352.1+ TGGGGGGCACATGGAGAGCCCTCATGGAGAGCTGCCTGGATCTGACACTGTGTCAGGAGA  
SRR765711.31552385.2- TGGGTGGCACATGGAGAGCCCTCATGGAGAGCTGCCTGGATCTGACACTGTGTCAGGAGA  
SRR765711.35892352.2+ TGGGTGGCACATGGAGAGCCCTCATGGAGAGCTGCCTGGATCTGACACTGTGTCAGGAGA  
SRR765711.39834426.1- TGGGTGGCACATGGAGAGCCCTCATGGAGAGCTGCCTGGATCTGACACTGTGTCAGGAGA  
SRR765711.42145081.1- TGGGTGGCACATGGAGAGCCCTCATGGAGAGCTGCCTGGATCTGACACTGTGTCAGGAGA  
SRR765711.55682203.2+ TGGGTGGCACATGGAGAGCCCTCATGGAGAGCTGCCTGGATCTGACACTGTGTCAGGAGA  
SRR765711.56339811.1+ TGGGTGGCACATGGAGAGCCCTCATGGAGAGCTGCCTGGATCTGACACTGTGTCAGGAGA  
SRR765711.6290287.2+ TGGGTGGCACATGGAGAGCCCTCATGGAGAGCTGCCTGGATCTGACACTGTGTCAGGAGA  
SRR765711.79664446.2+ TGGGTGGCACATGGAGAGCCCTCATGGAGAGCTGCCTGGATCTGACACTGTGTCAGGAGA  
SRR765711.83011887.2- TGGGTGGCACATGGAGAGCCCTCATGGAGAGCTGCCTGGATCTGACACTGTGTCAGGAGA  
SRR765712.121630012.2+ TGGGTGGCACATGGAGAGCCCTCATGGAGAGCTGCCTGGATCTGACACTGTGTCAGGAGA  
SRR765712.125893357.2- TGGGTGGCACATGGAGAGCCCTCATGGAGAGCTGCCTGGATCTGACACTGTGTCAGGAGA  
SRR765712.136103372.1- TGGGTGGCACATGGAGAGCCCTCATGGAGAGCTGCCTGGATCTGACACTGTGTCAGGAGA  
SRR765712.148429673.1+ TGGGTGGCACATGGAGAGCCCTCATGGAGAGCTGCCTGGATCTGACACTGTGTCAGGAGA  
SRR765712.151632343.1+ TGGGTGGCACATGGAGAGCCCTCATGGAGAGCTGCCTGGATCTGACACTGTGTCAGGAGA  
SRR765712.173925922.2- TGGGTGGCACATGGAGAGCCCTCATGGAGAGCTGCCTGGATCTGACACTGTGTCAGGAGA  
SRR765712.189246974.2+ TGGGTGGCACATGGAGAGCCCTCATGGAGAGCTGCCTGGATCTGACACTGTGTCAGGAGA  
SRR765712.197777944.1+ TGGGTGGCACATGGAGAGCCCTCATGGAGAGCTGCCTGGATCTGACACTGTGTCAGGAGA  
SRR765712.202510854.2+ TGGGTGGCACATGGAGAGCCCTCATGGAGAGCTGCCTGGATCTGACACTGTGTCAGGAGA  
SRR765712.220295908.2+ TGGGTGGCACATGGAGAGCCCTCATGGAGAGCTGCCTGGATCTGACACTGTGTCAGGAGA  
SRR765712.25672489.2- TGGGTGGCACATGGAGAGCCCTCATGGAGAGCTGCCTGGATCTGACACTGTGTCAGGAGA  
SRR765712.27955158.2- TGGGTGGCACATGGAGAGCCCTCATGGAGAGCTGCCTGGATCTGACACTGTGTCAGGAGA  
SRR765712.51340874.2+ TGGGTGGCACATGGAGAGCCCTCATGGAGAGCTGCCTGGATCTGACACTGTGTCAGGAGA  
SRR765712.72190442.2+ TGGGTGGCACATGGAGAGCCCTCATGGAGAGCTGCCTGGATCTGACACTGTGTCAGGAGA  
SRR765712.76576490.2- TGGGTGGCACATGGAGAGCCCTCATGGAGAGCTGCCTGGATCTGACACTGTGTCAGGAGA  
SRR765712.88008628.2- TGGGTGGCACATGGAGAGCCCTCATGGAGAGCTGCCTGGATCTGACACTGTGTCAGGAGA  
SRR765713.33934669.1+ TGGGTGGCACATGGAGAGCCCTCATGGAGAGCTGCCTGGATCTGACACTGTGTCAGGAGA  
SRR765713.8355185.1+ TGGGTGGCACATGGAGAGCCCTCATGGAGAGCCGCTGGATCTGACACTGTGTCAGGAGA  
SRR765714.102557296.2- TGGGTGGCACATGGAGAGCCCTCATGGAGAGCTGCCTGGATCTGACACTGTGTCAGGAGA  
SRR765714.111689744.2- TGGGTGGCACATGGAGAGCCCTCATGGAGAGCTGCCTGGATCTGACACTGTGTCAGGAGA  
SRR765714.114351789.1+ TGGGTGGCACATGGAGAGCCCTCATGGAGAGCTGCCTGGATCTGACACTGTGTCAGGAGA  
SRR765714.178949095.1- TGGGTGGCACATGGAGAGCCCTCATGGAGAGCTGCCTGGATCTGACACTGTGTCAGGAGA  
SRR765714.181600550.1- TGGGTGGCACATGGAGAGCCCTCATGGAGAGCTGCCTGGATCTGACACTGTGTCAGGAGA  
SRR765714.181917353.1- TGGGTGGCACATGGAGAGCCCTCATGGAGAGCTGCCTGGATCTGACACTGTGTCAGGAGA  
SRR765714.195543010.2- TGGGTGGCACATGGAGAGCCCTCATGGAGAGCTGCCTGGATCTGACACTGTGTCAGGAGA  
SRR765714.23956215.1+ TGGGTGGCACATGGAGAGCCCTCATGGAGAGCTGCCTGGATCTGACACTGTGTCAGGAGA  
SRR765714.43208061.2+ TGGGTGGCACATGGAGAGCCCTCATGGAGAGCTGCCTGGATCTGACACTGTGTCAGGAGA  
SRR765714.4956404.2- TGGGTGGCACATGGAGAGCCCTCATGGAGAGCTGCCTGGATCTGACACTGTGTCAGGAGA  
SRR765714.63395510.2- TGGGTGGCACATGGAGAGCCCTCATGGAGAGCTGCCTGGATCTGACACTGTGTCAGGAGA  
SRR765714.77066962.1+ TGGGTGGCACATGGAGAGCCCTCATGGAGAGCTGCCTGGATCTGACACTGTGTCAGGAGA  
SRR765714.82008612.2- TGGGTGGCACATGGAGAGCCCTCATGGAGAGCTGCCTGGATCTGACACTGTGTCAGGAGA  
SRR765714.86734657.2- TGGGTGGCACATGGAGAGCCCTCATGGAGAGCTGCCTGGATCTGACACTGTGTCAGGAGA  
SRR765715.16262666.2- TGGGTGGCACATGGAGAGCCCTCATGGAGAGCTGCCTGGATCTGACACTGTGTCAGGAGA  
SRR765715.18589469.2- TGGGTGGCACATGGAGAGCCCTCATGGAGAGCTGCCTGGATCTGACACTGTGTCAGGAGA  
SRR765715.27991329.1- TGGGTGGCACATGGAGAGCCCTCATGGAGAGCTGCCTGGATCTGACACTGTGTCAGGAGA  
SRR765715.48806277.1- TGGGTGGCACATGGAGAGCCCTCATGGAGAGCTGCCTGGATCTGACACTGTGTCAGGAGA  
SRR765716.10147584.2+ TGGGTGGCACATGGAGAGCCCTCATGGAGAGCTGCCTGGATCTGACACTGTGTCAGGAGA  
SRR765716.13051448.2- TGGGTGGCACATGGAGAGCCCTCATGGAGAGCTGCCTGGATCTGACACTGTGTCAGGAGA  
SRR765716.13424455.2- TGGGTGGCACATGGAGAGCCCTCATGGAGAGCTGCCTGGATCTGACACTGTGTCAGGAGA  
SRR765716.18110791.2+ TGGGTGGCACATGGAGAGCCCTCATGGAGAGCTGCCTGGATCTGACACTGTGTCAGGAGA  
SRR765716.27196679.2- TGGGTGGCACATGGAGAGCCCTCATGGAGAGCTGCCTGGATCTGACACTGTGTCAGGAGA  
SRR765716.6716252.2- TGGGTGGCACATGGAGAGCCCTCATGGAGAGCTGCCTGGATCTGACACTGTGTCAGGAGA  
SRR765716.29034131.2- TGGGTGGCACATGGAGAGCCCTCATGGAGAGCTGCCTGGATCTGACACTGTGTCAGGAGA  
SRR765712.138777141.1- TGGCACATGGAGAGCCCTCATGGAGAGCTGCCTGGATCTGACACTGTGTCAGGAGA  
SRR765715.30571678.2- TGGCACATGGAGAGCCCTCATGGAGAGCTGCCTGGATCTGACACTGTGTCAGGAGA  
SRR765715.36409904.2- TGGCACATGGAGAGCCCTCATGGAGAGCTGCCTGGATCTGACACTGTGTCAGGAGA  
SRR765711.68524181.1+ ACATGGAGAGCCCTCATGGAGAGCTGCCTGGATCTGACACTGTGTCAGGAGA  
SRR765712.64070721.2+ ACATGGAGAGCCCTCATGGAGAGCTGCCTGGATCTGACACTGTGTCAGGAGA  
SRR765713.25918438.2- ACATGGAGAGCCCTCATGGAGAGCTGCCTGGATCTGACACTGTGTCAGGAGA  
SRR765712.205681324.2+ ATGGAGAGCCCTCATGGAGAGCTGCCTGGATCTGACACTGTGTCAGGAGA  
SRR765713.13238228.2+ ATGGAGAGCCCTCATGGAGAGCTGCCTGGATCTGACACTGTGTCAGGAGA  
SRR765714.135078852.2+ ATGGAGAGCCCTCATGGAGAGCTGCCTGGATCTGACACTGTGTCAGGAGA  
SRR765712.218218238.1+ TGGAGAGCCCTCATGGAGAGCTGCCTGGATCTGACACTGTGTCAGGAGA  
SRR765710.70286255.1- GGAGAGCCCTCATGGAGAGCTGCCTGGATCTGACACTGTGTCAGGAGA

SRR765712.122158002.1+ GGAGAGCCCTCATGGAGAGCTGCCTGGATCTGACACTGTGTCAGGAGA  
SRR765711.131295664.2+ AGAGCCCTCATGGAGAGCTGCCTGGATCTGACACTGTGTCAGGAGA  
SRR765712.185452286.1+ AGGCCCTCATGGAGAGCTGCCTGGATCTGACACTGTGTCAGGAGA  
SRR765713.23757933.2- GAGCCCTCATGGAGAGCTGCCTGGATCTGACACTGTGTCAGGAGA  
SRR765713.28931355.2+ GAGCCCTCATGGAGAGCTGCCTGGATCTGACACTGTGTCAGGAGA  
SRR765712.165744054.1- CCTCATGGAGAGCTGCCTGGATCTGACACTGTGTCAGGAGA  
SRR765714.167377556.1+ CCTCATGGAGAGCTGCCTGGATCTGACACTGTGTCAGGAGA  
SRR765710.12300792.1- CCTCATGGAGAGCTGCCTGGATCTGACACTGTGTCAGGAGA  
SRR765710.75143655.1+ ATGGAGAGCTGCCTGGATCTGACACTGTGTCAGGAGA  
SRR765713.13781601.2+ ATGGAGAGCTGCCTGGATCTGACACTGTGTCAGGAGA  
SRR765713.22750873.1+ ATGGAGAGCTGCCTGGATCTGACACTGTGTCAGGAGA  
SRR765715.16533716.1- ATGGAGAGCTGCCTGGATCTGACACTGTGTCAGGAGA  
SRR765712.128159580.1- TGGAGAGCTGCCTGGATCTGACACTGTGTCAGGAGA  
SRR765712.99870371.2- TGGAGAGCTGCCTGGATCTGACACTGTGTCAGGAGA  
SRR765714.2480924.2+ TGGAGAGCTGCCTGGATCTGACACTGTGTCAGGAGA  
SRR765714.40452062.2+ TGGAGAGCTGCCTGGATCTGACACTGTGTCAGGAGA  
SRR765709.7414701.1+ GGAGAGCTGCCTGGATCTGACACTGTGTCAGGAGA  
SRR765712.158301577.2- GAGAGCTGCCTGGATCTGACACTGTGTCAGGAGA  
SRR765712.183278959.2- AGAGCTGCCTGGATCTGACACTGTGTCAGGAGA  
SRR765712.214292832.1+ AGAGCTGCCTGGATCTGACACTGTGTCAGGAGA  
SRR765710.73677951.1- GAGCTGCCTGGATCTGACACTGTGTCAGGAGA  
SRR765712.43404440.2- GCTGCCTGGATCTGACACTGTGTCAGGAGA  
SRR765712.51340874.1- TGCCCTGGATCTGACACTGTGTCAGGAGA  
SRR765709.21897156.2- GCCTGGATCTGACACTGTGTCAGGAGA  
SRR765711.13388429.1+ GCCTGGATCTGACACTGTGTCAGGAGA  
SRR765712.121630012.1- CCTGGATCTGACACTGTGTCAGGAGA  
SRR765711.74112939.1+ CTGGATCTGACACTGTGTCAGGAGA  
SRR765712.72190442.1- CTGGATCTGACACTGTGTCAGGAGA  
SRR765712.171142138.2- TGACACTGTGTCAGGAGA  
SRR765709.26128387.1- ACACCTGTGTCAGGAGA  
SRR765711.132150187.1+ ACACTGTGTCAGGAGA  
SRR765711.79664446.1- CACTGTGTCAGGAGA  
SRR765712.85106693.2- CACTGTGTCAGGAGA  
SRR765710.27338352.1- CTGTGTCAGGAGA  
SRR765712.122158002.2- CTGTGTCAGGAGA  
SRR765709.62253164.1+ TGTGTCAGGAGA  
SRR765714.186542268.1- TGTGTCAGGAGA  
SRR765711.33485371.2+ GTGTCAGGAGA  
SRR765714.151210991.2- GTGTCAGGAGA  
SRR765712.36675453.1+ GTCAGGAGA  
SRR765712.217980781.2+ TCAGGAGA  
SRR765712.66526516.1+ TCAGGAGA  
SRR765715.38198709.1- TCAGGAGA  
SRR765709.56584448.2+ CAGGAGA  
SRR765711.23637391.2+ CAGGAGA  
SRR765714.129672082.1- AGGAGA

consensus

TGGGTGGCACATGGAGAGCCCTCATGGAGAGCTGCCTGGATCTGACACTGTGTCAGGAGA

. : . : . : . : . : . :  
SRR765710.27338352.2+ T  
SRR765711.13566352.1+ T  
SRR765712.51340874.2+ T  
SRR765712.72190442.2+ T  
SRR765712.76576490.2- TG  
SRR765711.39834426.1- TGC  
SRR765711.79664446.2+ TGC  
SRR747825.12487751.2- TGCCT  
SRR747825.12965830.2- TGCCT  
SRR747825.14196148.2- TGCCT  
SRR747825.17726022.2- TGCCT  
SRR747825.21410409.2- TGCCT  
SRR747825.26095160.2- TGCCT  
SRR747825.26346030.2- TGCCT  
SRR747825.35226945.2- TGCCT  
SRR747825.36267467.2- TGCCT  
SRR747825.42525078.2- TGCCT  
SRR747825.4608608.2- TGCCT  
SRR747825.7988087.2- TGCCT  
SRR747825.8350873.2- TGCCT  
SRR765709.3017797.1- TGCCT  
SRR765714.63395510.2- TGCCT  
SRR765714.82008612.2- TGCCT  
SRR765710.11110602.2- TGCCTA  
SRR765711.6290287.2+ TGCCTAC  
SRR765712.197777944.1+ TGCCTAC  
SRR765710.78316546.2- TGCCTACC  
SRR765709.13217291.1+ TGCCTACCG  
SRR765715.16262666.2- TGCCTACCG  
SRR765715.18589469.2- TGCCTACCG  
SRR765716.10147584.2+ TGCCTACCGG  
SRR765716.18110791.2+ TGCCTACCGG  
SRR765709.13162642.1- TGCCTACCGGA  
SRR765710.41723497.1+ TGCCTACCGGAG

SRR765714.77066962.1+ TGCCTACCGGAG  
SRR765714.181917353.1- TGCCTACCGGAGT  
SRR765711.31552385.2- TGCCTACCGGAGTG  
SRR765711.35892352.2+ TGCCTACCGGAGTG  
SRR765714.23956215.1+ TGCCTACCGGAGTG  
SRR765710.66135762.1- TGCCTACCGGAGTGGC  
SRR765712.88008628.2- TGCCTACCGGAGTGGCA  
SRR765714.181600550.1- TGCCTACCGGAGTGGCA  
SRR765711.102739620.2+ TGCCTACCGGAGTGGCAG  
SRR765712.148429673.1+ TGCCTACCGGAGTGGCAGC  
SRR765714.178949095.1- TGCCTACCGGAGTGGCAGC  
SRR765711.56339811.1+ TGCCTACCGGAGTGGCAGCAT  
SRR765709.40884677.1+ TGCCTACCGGAGTGGCAGCATC  
SRR765712.151632343.1+ TGCCTACCGGAGTGGCAGCATC  
SRR765712.25672489.2- TGCCTACCGGAGTGGCAGCATCT  
SRR765712.220295908.2+ TGCCTACCGGAGTGGCAGCATCTG  
SRR765712.27955158.2- TGCCTACCGGAGTGGCAGCATCTG  
SRR765713.8355185.1+ TGCCTACCGGAGTGGCAGCATCTG  
SRR765710.10250671.1+ TGCCTACCGGAGTGGCAGCATCTGCTTC  
SRR765710.6584671.2+ TGCCTACCGGAGTGGCAGCATCTGCTTCC  
SRR765714.86734657.2- TGCCTACCGGAGTGGCAGCATCTGCTTCC  
SRR765709.62403711.1+ TGCCTACCGGAGTGGCAGCATCTGCTTCCC  
SRR765712.125893357.2- TGCCTACCGGAGTGGCAGCATCTGCTTCCCT  
SRR765714.195543010.2- TGCCTACCGGAGTGGCAGCATCTGCTTCCCT  
SRR765714.43208061.2+ TGCCTACCGGAGTGGCAGCATCTGCTTCCCT  
SRR765710.14715271.2- TGCCTACCGGAGTGGCAGCATCTGCTTCCCTg  
SRR765714.102557296.2- TGCCTACCGGAGTGGCAGCATCTGCTTCCCTg  
SRR765714.111689744.2- TGCCTACCGGAGTGGCAGCATCTGCTTCCCTg  
SRR765715.27991329.1- TGCCTACCGGAGTGGCAGCATCTGCTTCCCTg  
SRR765715.48806277.1- TGCCTACCGGAGTGGCAGCATCTGCTTCCCTg  
SRR765711.42145081.1- TGCCTACCGGAGTGGCAGCATCTGCTTCCCTgt  
SRR765712.136103372.1- TGCCTACCGGAGTGGCAGCATCTGCTTCCCTgt  
SRR765709.44632583.1- TGCCTACCGGAGTGGCAGCATCTGCTTCCCTgta  
SRR765712.121630012.2+ TGCCTACCGGAGTGGCAGCATCTGCTTCCCTgta  
SRR765712.189246974.2+ TGCCTACCGGAGTGGCAGCATCTGCTTCCCTgta  
SRR765716.13051448.2- TGCCTACCGGAGTGGCAGCATCTGCTTCCCTgtaa  
SRR765716.13424455.2- TGCCTACCGGATTGGCAGCATCTGCTTCCCTgtaa  
SRR765716.27196679.2- TGCCTACCGGAGTGGCAGCATCTGCTTCCCTgtaa  
SRR765716.29034131.2- TGCCTACCGGAGTGGCAGCATCTGCTTCCCTgtaa  
SRR765716.6716252.2- TGCCTACCGGAGTGGCAGCATCTGCTTCCCTgtaa  
SRR765714.4956404.2- TGCCTACCGGAGTGGCAGCATCTGCTTCCCTgtaag  
SRR765711.55682203.2+ TGCCTACCGGAGTGGCAGCATCTGCTTCCCTgtaagc  
SRR765709.15951076.2+ TGCCTACCGGAGTGGCAGCATCTGCTTCCCTgtaagct  
SRR765709.87544394.2- TGCCTACCGGAGTGGCAGCATCTGCTTCCCTgtaagct  
SRR765712.173925922.2- TGCCTACCGGAGTGGCAGCATCTGCTTCCCTgtaagctg  
SRR765709.44907493.2+ TGCCTACCGGAGTGGCAGCATCTGCTTCCCTgtaagctgaa  
SRR765712.202510854.2+ TGCCTACCGGAGTGGCAGCATCTGCTTCCCTgtaagctgaa  
SRR765712.138777141.1- TGCCTACCGGAGTGGCAGCATCTGCTTCCCTgtaagctgaaacaga  
SRR765715.30571678.2- TGCCTACCGGAGTGGCAGCATCTGCTTCCCTgtaagctgaaacaga  
SRR765715.36409904.2- TGCCTACCGGAGTGGCAGCAACTGCTTCCCTgtaagctgaaacaga  
SRR765713.25918438.2- TGCCTACCGGAGTGGCAGCATCTGCTTCCCTgtaagctgaaacagattt  
SRR765711.68524181.1+ TGCCTACCGGAGTGGCAGCATCTGCTTCCCTgtaagctgaaacagatttc  
SRR765712.64070721.2+ TGCCTACCGGAGTGGCAGCATCTGCTTCCCTgtaagctgaaacagatttc  
SRR765713.13238228.2+ TGCCTACCGGAGTGGCAGCATCTGCTTCCCTgtaagctgaaacagatttcc  
SRR765714.135078852.2+ TGCCTACCGGAGTGGCAGCATCTGCTTCCCTgtaagctgaaacagatttcc  
SRR765712.205681324.2+ TGCCTACCGGAGTGGCAGCATCTGCTTCCCTgtaagctgaaacagatttccct  
SRR765712.218218238.1+ TGCCTACCGGAGTGGCAGCATCTGCTTCCCTgtaagctgaaacagatttccctc  
SRR765710.70286255.1- TGCCTACCGGAGTGGCAGCATCTGCTTCCCTgtaagctgaaacagatttccctc  
SRR765712.122158002.1+ TGCCTACCGGAGTGGCAGCATCTGCTTCCCTgtaagctgaaacagatttccctc  
SRR765711.131295664.2+ TGCCTACCGGAGTGGCAGCATCTGCTTCCCTgtaagctgaaacagatttccctcttc  
SRR765712.185452286.1+ TGCCTACCGGAGTGGCAGCATCTGCTTCCCTgtaagctgaaacagatttccctcttc  
SRR765713.23757933.2- TGCCTACCGGAGTGGCAGCATCTGCTTCCCTgtaagctgaaacagatttccctcttc  
SRR765713.28931355.2+ TGCCTACCGGAGTGGCAGCATCTGCTTCCCTgtaagctgaaacagatttccctcttc  
SRR765714.167377556.1+ TGCCTACCGGAGTGGCAGCATCTGCTTCCCTgtaagctgaaacagatttccctcttcaac  
SRR765712.165744054.1- TGCCTACCGGAGTGGCAGCATCTGCTTCCCTgtaagctgaaacagatttccctcttcaacc  
SRR765709.21897156.2- TGCCTACCGGAGTGGCAGCATCTGCTTCCCTgtaagctgaaacagatttccctcttcaacc  
SRR765709.26128387.1- TGCCTACCGGAGTGGCAGCATCTGCTTCCCTgtaagctgaaacagatttccctcttcaacc  
SRR765709.56584448.2+ TGCCTACCGGAGTGGCAGCATCTGCTTCCCTgtaagctgaaacagatttccctcttcaacc  
SRR765709.62253164.1+ TGCCTACCGGAGTGGCAGCATCTGCTTCCCTgtaagctgaaacagatttccctcttcaacc  
SRR765709.7414701.1+ TGCCTACCGGAGTGGCAGCATCTGCTTCCCTgtaagctgaaacagatttccctcttcaacc  
SRR765710.12300792.1- TGCCTACCGGAGTGGCAGCATCTGCTTCCCTgtaagctgaaacagatttccctcttcaacc  
SRR765710.27338352.1- TGCCTACCGGAGTGGCAGCATCTGCTTCCCTgtaagctgaaacagatttccctcttcaacc  
SRR765710.73677951.1- TGCCTACCGGAGTGGCAGCATCTGCTTCCCTgtaagctgaaacagatttccctcttcaacc  
SRR765710.75143655.1+ TGCCTACCGGAGTGGCAGCATCTGCTTCCCTgtaagctgaaacagatttccctcttcaacc  
SRR765711.132150187.1+ TGCCTACCGGAGTGGCAGCATCTGCTTCCCTgtaagctgaaacagatttccctcttcaacc  
SRR765711.13388429.1+ TGCCTACCGGAGTGGCAGCATCTGCTTCCCTgtaagctgaaacagatttccctcttcaacc  
SRR765711.23637391.2+ TGCCTACCGGAGTGGCAGCATCTGCTTCCCTgtaagctgaaacagatttccctcttcaacc  
SRR765711.33485371.2+ TGCCTACCGGAGTGGCAGCATCTGCTTCCCTgtaagctgaaacagatttccctcttcaacc  
SRR765711.74112939.1+ TGCCTACCGGAGTGGCAGCATCTGCTTCCCTgtaagctgaaacagatttccctcttcaacc  
SRR765711.79664446.1+ TGCCTACCGGAGTGGCAGCATCTGCTTCCCTgtaagctgaaacagatttccctcttcaacc  
SRR765712.121630012.1- TGCCTACCGGAGTGGCAGCATCTGCTTCCCTgtaagctgaaacagatttccctcttcaacc  
SRR765712.122158002.2- TGCCTACCGGAGTGGCAGCATCTGCTTCCCTgtaagctgaaacagatttccctcttcaacc  
SRR765712.128159580.1- TGCCTACCGGAGTGGCAGCATCTGCTTCCCTgtaagctgaaacagatttccctcttcaacc  
SRR765712.158301577.2- TGCCTACCGGAGTGGCAGCATCTGCTTCCCTgtaagctgaaacagatttccctcttcaacc

SRR765712.171142138.2- TGCCTACCGGAGTGGCAGCATCTGCTTCCCTgtaagctgaacagatttcctcttcaaccc  
SRR765712.183278959.2- TGCCTACCGGAGTGGCAGCATCTGCTTCCCTgtaagctgaacagatttcctcttcaaccc  
SRR765712.214292832.1+ TGCCTACCGGAGTGGCAGCATCTGCTTCCCTgtaagctgaacagatttcctcttcaaccc  
SRR765712.217980781.2+ TGCCTACCGGAGTGGCAGCATCTGCTTCCCTgtaagctgaacagatttcctcttcaaccc  
SRR765712.36675453.1+ TGCCTACCGGAGTGGCAGCATCTGCTTCCCTgtaagctgaacagatttcctcttcaaccc  
SRR765712.43404440.2- TGCCTACCGGAGTGGCAGCATCTGCTTCCCTgtaagctgaacagatttcctcttcaaccc  
SRR765712.51340874.1- TGCCTACCGGAGTGGCAGCATCTGCTTCCCTgtaagctgaacagatttcctcttcaaccc  
SRR765712.66526516.1+ TGCCTACCGGAGTGGCAGCATCTGCTTCCCTgtaagctgaacagatttcctcttcaaccc  
SRR765712.72190442.1- TGCCTACCGGAGTGGCAGCATCTGCTTCCCTgtaagctgaacagatttcctcttcaaccc  
SRR765712.85106693.2- TGCCTACCGGAGTGGCAGCATCTGCTTCCCTgtaagctgaacagatttcctcttcaaccc  
SRR765712.99870371.2- TGCCTACCGGAGTGGCAGCATCTGCTTCCCTgtaagctgaacagatttcctcttcaaccc  
SRR765713.13781601.2+ TGCCTACCGGAGTGGCAGCATCTGCTTCCCTgtaagctgaacagatttcctcttcaaccc  
SRR765713.22750873.1+ TGCCTACCGGAGTGGCAGCATCTGCTTCCCTgtaagctgaacagatttcctcttcaaccc  
SRR765714.129672082.1- TGCCTACCGGAGTGGCAGCATCTGCTTCCCTgtaagctgaacagatttcctcttcaaccc  
SRR765714.151210991.2- TGCCTACCGGAGTGGCAGCATCTGCTTCCCTgtaagctgaacagatttcctcttcaaccc  
SRR765714.186542268.1- TGCCTACCGGAGTGGCAGCATCTGCTTCCCTgtaagctgaacagatttcctcttcaaccc  
SRR765714.2480924.2+ TGCCTACCGGAGTGGCAGCATCTGCTTCCCTgtaagctgaacagatttcctcttcaaccc  
SRR765714.40452062.2+ TGCCTACCGGAGTGGCAGCATCTGCTTCCCTgtaagctgaacagatttcctcttcaaccc  
SRR765715.16533716.1- TGCCTACCGGAGTGGCAGCATCTGCTTCCCTgtaagctgaacagatttcctcttcaaccc  
SRR765715.38198709.1- TGCCTACCGGAGTGGCAGCATCTGCTTCCCTgtaagctgaacagatttcctcttcaaccc

consensus

TGCCTACCGGAGTGGCAGCATCTGCTTCCCTgtaagctgaacagatttcctcttcaaccc

---

## E. Collared flycatcher (No. 6), exon 1, WGS data

- CAP3 alignment of WGS data spanning exon 1 (uppercase letters)

```
ERR117212.6476186.2-      . . . . . : . . . . . : . . . . . : . . . . . : . . . . . :
ERR117201.2485870.1-      cccaaggtatcagcaggactcagagactgcagagATGATGTTTTGTTCTTCTCAGGAAT
ERR117191.3942459.1+      cagagactgcagcgATGATGTTTTGTTCTTCTCAGGAAT
ERR117214.14172132.2+      agactgcagagATGATGTTTTGTTCTTCTCAGGAAT
ERR117209.2234770.2+      ctgcagagATGATGTTTTGTTCTTCTCAGGAAT
ERR117172.15932939.1-      gcagagATGATGTTTTGTTCTTCTCAGGAAT
ERR117162.17731664.1-      agATGATGTTTTGTTCTTCTCAGGAAT
ERR117162.20390690.1-      ATGATGTTTTGTTCTTCTCAGGAAT
ERR117162.15239877.1-      ATGATGTTTTGTTCTTCTCAGGAAT
ERR117162.24743150.1+      TGATGTTTTGTTCTTCTCAGGAAT
ERR117187.1846104.1+      ATGTTTTGTTCTTCTCAGGAAT
ERR117195.8720933.1-      ATGTTTTGTTCTTCTCAGGAAT
ERR117195.13585097.1-      GTTTTGTTCTTCTCAGGAAT
ERR117212.8693972.1-      TTTTGTCTTCTCAGGAAT
ERR117213.20630415.2-      TTTTGTGCTTCTCAGGAAT
ERR117188.6260249.1-      TGTTCTTCTCAGGAAT
ERR117189.3627525.1+      GTTCTTCTCAGGAAT
ERR117167.13563954.1+      GTTCTTCTCAGGAAT
ERR117184.14295738.2-      TCTCAGGAAT
ERR117211.10510244.1+      TCTCAGTAAT
ERR117203.460754.1-      TCAGGAAT
ERR117214.14172132.1-      CAGGAAT
ERR117190.4710130.1-      AGGAAT
ERR117186.15182709.1-      GAAT
ERR117186.19827414.1-      T
T
```

consensus

```
cccaaggtatcagcaggactcagagactgcagagATGATGTTTTGTTCTTCTCAGGAAT
```

```
ERR117212.6476186.2-      . . . . . : . . . . . : . . . . . : . . . . . : . . . . . :
ERR117153.26125281.2+      CAAGAAAATGCTCTTCCTCTAGTTCTCTCATGCTTTTGTCTGGCTGCTTGCATCTCC
ERR117154.46542049.2+      CAAGAAAATGCTCTTCCTCTAGTTCTCTCATGCTTTTGTCTGGCTGCTTGCATCTCC
ERR117154.7676116.2+      CAAGAAAATGCTCTTCCTCTAGTTCTCTCATGCTTTTGTCTGGCTGCTTGCATCTCC
ERR117155.48606278.2+      CAAGAAAATGCTCTTCCTCTAGTTCTCTCATGCTTTTGTCTGGCTGCTTGCATCTCC
ERR117162.15239877.1-      CAAGAAAATGCTCTTCCTCTAGTTCTCTCATGCTTTTGTCTGGCTGCTTGCATCTCC
ERR117162.17731664.1-      CAAGAAAATGCTCTTCCTCTAGTTCTCTCATGCTTTTGTCTGGCTGCTTGCATCTCC
ERR117162.20390690.1-      CAAGAAAATGCTCTTCCTCTAGTTCTCTCATGCTTTTGTCTGGCTGCTTGCATCTCC
ERR117162.24743150.1+      CAAGAAAATGCTCTTCCTCTAGTTCTCTCATGCTTTTGTCTGGCTGCTTGCATCTCC
ERR117167.13563954.1+      CAAGAAAATGCTCTTCCTCTAGTTCTCTCATGCTTTTGTCTGGCTGCTTGCATCTCC
ERR117169.908271.1-      CAAGAAAATGCTCTTCCTCTAGTTCTCTCATGCTTTTGTCTGGCTGCTTGCATCTCC
ERR117172.15932939.1-      CAAGAAAATGCTCTTCCTCTAGTTCTCTCATGCTTTTGTCTGGCTGCTTGCATCTCC
ERR117184.14295738.2-      CAAGAAAATGCTCTTCCTCTAGTTCTCTCATGCTTTTGTCTGGCTGCTTGCATCTCC
ERR117186.15182709.1-      CAAGAAAATGCTCTTCCTCTAGTTCTCTCATGCTTTTGTCTGGCTGCTTGCATCTCC
ERR117186.19827414.1-      CAAGAAAATGCTCTTCCTCTAGTTCTCTCATGCTTTTGTCTGGCTGCTTGCATCTCC
ERR117187.1846104.1+      CAAGAAAATGCTCTTCCTCTAGTTCTCTCATGCTTTTGTCTGGCTGCTTGCATCTCC
ERR117188.6260249.1-      CAAGAAAATGCTCTTCCTCTAGTTCTCTCATGCTTTTGTCTGGCTGCTTGCATCTCC
ERR117189.3627525.1+      CAAGAAAATGCTCTTCCTCTAGTTCTCTCATGCTTTTGTCTGGCTGCTTGCATCTCC
ERR117190.4710130.1-      CAAGAAAATGCTCTTCCTCTAGTTCTCTCATGCTTTTGTCTGGCTGCTTGCATCTCC
ERR117191.3942459.1+      CAAGAAAATGCTCTTCCTCTAGTTCTCTCATGCTTTTGTCTGGCTGCTTGCATCTCC
ERR117195.13585097.1-      CAAGAAAATGCTCTTCCTCTAGTTCTCTCATGCTTTTGTCTGGCTGCTTGCATCTCC
ERR117195.8720933.1-      CAAGAAAATGCTCTTCCTCTAGTTCTCTCATGCTTTTGTCTGGCTGCTTGCATCTCC
ERR117201.2485870.1-      CAAGAAAATGCTCTTCCTCTAGTTCTCTCATGCTTTTGTCTGGCTGCTTGCATCTCC
ERR117203.460754.1-      CAAGAAAATGCTCTTCCTCTAGTTCTCTCATGCTTTTGTCTGGCTGCTTGCATCTCC
ERR117209.2234770.2+      CAAGAAAATGCTCTTCCTCTAGTTCTCTCATGCTTTTGTCTGGCTGCTTGCATCTCC
ERR117211.10510244.1+      CAAGAAAATGCTCTTCCTCTAGTTCTCTCATGCTTTTGTCTGGCTGCTTGCATCTCC
ERR117212.8693972.1-      CAAGAAAATGCTCTTCCTCTAGTTCTCTCATGCTTTTGTCTGGCTGCTTGCATCTCC
ERR117213.20630415.2-      CAAGAAAATGCTCTTCCTCTAGTTCTCTCATGCTTTTGTCTGGCTGCTTGCATCTCC
ERR117214.14172132.1-      CAAGAAAATGCTCTTCCTCTAGTTCTCTCATGCTTTTGTCTGGCTGCTTGCATCTCC
ERR117214.14172132.2+      CAAGAAAATGCTCTTCCTCTAGTTCTCTCATGCTTTTGTCTGGCTGCTTGCATCTCC
ERR117153.25248628.2+      AAGAAAATGCTCTTCCTCTAGTTCTCTCATGCTTTTGTCTGGCTGCTTGCATCTCC
ERR117153.28715906.2+      AAGAAAATGCTCTTCCTCTAGTTCTCTCATGCTTTTGTCTGGCTGCTTGCATCTCC
ERR117153.39929989.2+      AAGAAAATGCTCTTCCTCTAGTTCTCTCATGCTTTTGTCTGGCTGCTTGCATCTCC
ERR117153.50977464.2+      AAGAAAATGCTCTTCCTCTAGTTCTCTCATGCTTTTGTCTGGCTGCTTGCATCTCC
ERR117153.52435271.1+      AAGAAAATGCTCTTCCTCTAGTTCTCTCATGCTTTTGTCTGGCTGCTTGCATCTCC
ERR117153.9559693.1+      AAGAAAATGCTCTTCCTCTAGTTCTCTCATGCTTTTGTCTGGCTGCTTGCATCTCC
ERR117154.24132143.2+      AAGAAAATGCTCTTCCTCTAGTTCTCTCATGCTTTTGTCTGGCTGCTTGCATCTCC
ERR117154.28182887.1+      AAGAAAATGCTCTTCCTCTAGTTCTCTCATGCTTTTGTCTGGCTGCTTGCATCTCC
ERR117154.32244393.2+      AAGAAAATGCTCTTCCTCTAGTTCTCTCATGCTTTTGTCTGGCTGCTTGCATCTCC
ERR117154.51549766.2+      AAGAAAATGCTCTTCCTCTAGTTCTCTCATGCTTTTGTCTGGCTGCTTGCATCTCC
ERR117154.52572361.2+      AAGAAAATGCTCTTCCTCTAGTTCTCTCATGCTTTTGTCTGGCTGCTTGCATCTCC
ERR117154.53521277.1+      AAGAAAATGCTCTTCCTCTAGTTCTCTCATGCTTTTGTCTGGCTGCTTGCATCTCC
ERR117154.55843371.2+      AAGAAAATGCTCTTCCTCTAGTTCTCTCATGCTTTTGTCTGGCTGCTTGCATCTCC
ERR117155.1676696.1+      AAGAAAATGCTCTTCCTCTAGTTCTCTCATGCTTTTGTCTGGCTGCTTGCATCTCC
ERR117155.24901097.2+      AAGAAAATGCTCTTCCTCTAGTTCTCTCATGCTTTTGTCTGGCTGCTTGCATCTCC
ERR117155.27398178.1+      AAGAAAATGCTCTTCCTCTAGTTCTCTCATGCTTTTGTCTGGCTGCTTGCATCTCC
```



ERR117155.30544527.2+ AAGAAAATGCTCTTCCTCTAGTTCTCTCATGCTTTTGGTCTGGCCTGCTTGCATCTCC  
ERR117155.32031392.1+ AAGAAAATGCTCTTCCTCTAGTTCTCTCATGCTTTTGGTCTGGCCTGCTTGCATCTCC  
ERR117155.35114720.1+ AAGAAAATGCTCTTCCTCTAGTTCTCTCATGCTTTTGGTCTGGCCTGCTTGCATCTCC  
ERR117155.56017163.2+ AAGAAAATGCTCTTCCTCTAGTTCTCTCATGCTTTTGGTCTGGCCTGCTTGCATCTCC  
ERR117155.58927721.1+ AAGAAAATGCTCTTCCTCTAGTTCTCTCATGCTTTTGGTCTGGCCTGCTTGCATCTCC  
ERR117155.5975449.2+ AAGAAAATGCTCTTCCTCTAGTTCTCTCATGCTTTTGGTCTGGCCTGCTTGCATCTCC  
ERR117158.24629168.2- AAGAAAATGCTCTTCCTCTAGTTCTCTCATGCTTTTGGTCTGGCCTGCTTGCATCTCC  
ERR117168.6760065.1+ AGAAAATGCTCTTCCTCTAGTTCTCTCATGCTTTTGGTCTGGCCTGCTTGCATCTCC  
ERR117185.11582461.2- AGAAAATGCTCTTCCTCTAGTTCTCTCATGCTTTTGGTCTGGCCTGCTTGCATCTCC  
ERR117187.8211208.1- AGAAAATGCTCTTCCTCTAGTTCTCTCATGCTTTTGGTCTGGCCTGCTTGCATCTCC  
ERR117189.16427324.1+ GAAAATGCTCTTCCTCTAGTTCTCTCATGCTTTTGGTCTGGCCTGCTTGCATCTCC  
ERR117189.16427324.2- GAAAATGCTCTTCCTCTAGTTCTCTCATGCTTTTGGTCTGGCCTGCTTGCATCTCC  
ERR117158.4154112.1+ AAATGCTCTTCCTCTAGTTCTCTCATGCTTTTGGTCTGGCCTGCTTGCATCTCC  
ERR117160.9073880.1- AAATGCTCTTCCTCTAGTTCTCTCATGCTTTTGGTCTGGCCTGCTTGCATCTCC  
ERR117162.29804872.1- AATGCTCTTCCTCTAGTTCTCTCATGCTTTTGGTCTGGCCTGCTTGCATCTCC  
ERR117170.149546.1- AATGCTCTTCCTCTAGTTCTCTCATGCTTTTGGTCTGGCCTGCTTGCATCTCC  
ERR117186.14041801.1+ AATGCTCTTCCTCTAGTTCTCTCATGCTTTTGGTCTGGCCTGCTTGCATCTCC  
ERR117195.13433153.1+ AATGCTCTTCCTCTAGTTCTCTCATGCTTTTGGTCTGGCCTGCTTGCATCTCC  
ERR117195.19866522.1+ AATGCTCTTCCTCTAGTTCTCTCATGCTTTTGGTCTGGCCTGCTTGCATCTCC  
ERR117195.20596627.1+ AATGCTCTTCCTCTAGTTCTCTCATGCTTTTGGTCTGGCCTGCTTGCATCTCC  
ERR117171.21382053.1+ ATGCTCTTCCTCTAGTTCTCTCATGCTTTTGGTCTGGCCTGCTTGCATCTCC  
ERR117187.13695262.1- TGCTCTTCCTCTAGTTCTCTCATGCTTTTGGTCTGGCCTGCTTGCATCTCC  
ERR117190.26390213.1- TGCTCTTCCTCTAGTTCTCTCATGCTTTTGGTCTGGCCTGCTTGCATCTCC  
ERR117168.17100909.1- GCTCTTCCTCTAGTTCTCTCATGCTTTTGGTCTGGCCTGCTTGCATCTCC  
ERR117172.12496667.1- GCTCTTCCTCTAGTTCTCTCATGCTTTTGGTCTGGCCTGCTTGCATCTCC  
ERR117189.17247817.1+ GCTCTTCCTCTAGTTCTCTCATGCTTTTGGTCTGGCCTGCTTGCATCTCC  
ERR117195.13729654.1+ GCTCTTCCTCTAGTTCTCTCATGCTTTTGGTCTGGCCTGCTTGCATCTCC  
ERR117195.13884831.1+ GCTCTTCCTCTAGTTCTCTCATGCTTTTGGTCTGGCCTGCTTGCATCTCC  
ERR117211.11635529.1+ CTCTTCCTCTAGTTCTCTCATGCTTTTGGTCTGGCCTGCTTGCATCTCC  
ERR117213.10610064.2+ TCTTCCTCTAGTTCTCTCATGCTTTTGGTCTGGCCTGCTTGCATCTCC  
ERR117173.232780.1+ TTCCTCTAGTTCTCTCATGCTTTTGGTCTGGCCTGCTTGCATCTCC  
ERR117172.1851309.1+ CCTCTAGTTCTCTCATGCTTTTGGTCTGGCCTGCTTGCATCTCC  
ERR117207.3319922.1- CCTCTAGTTCTCTCATGCTTTTGGTCTGGCCTGCTTGCATCTCC  
ERR117190.38583922.2+ TCTAGTTCTCTCATGCTTTTGGTCTGGCCTGCTTGCATCTCC  
ERR117173.12302743.2+ AGTTTCCTCTCATGCTTTTGGTCTGGCCTGCTTGCATCTCC  
ERR117170.12478522.2+ GTTCTCTCATGCTTTTGGTCTGGCCTGCTTGCATCTCC  
ERR117189.19092939.2+ TTCCTCTCATGCTTTTGGTCTGGCCTGCTTGCATCTCC  
ERR117190.29386046.1+ TCCCTCTCATGCTTTTGGTCTGGCCTGCTTGCATCTCC  
ERR117195.6901054.1- CTCTCACGCTTTTGGTCTGGCCTGCTTGCATCTCC  
ERR117167.544228.1+ CTATGCTTTTGGTCTGGCCTGCTTGCATCTCC  
ERR117186.4205347.1- CTCATGCTTTTGGTCTGGCCTGCTTGCATCTCC  
ERR117195.5115980.1- TCATGCTTTTCTGCTGGCCTGCTTGCATCTCC  
ERR117195.6900905.1- TCATGCTTTTTTTCGGGCTGCTTGCATCTCC  
ERR117170.11495570.1+ CATGCTTTTGGTCTGGCCTGCTTGCATCTCC  
ERR117173.1405665.2- ATGCTTTTGGTCTGGCCTGCTTGCATCTCC  
ERR117186.21463358.2+ ATGCTTTTGGTCTGGCCTGCTTGCATCTCC  
ERR117160.6004183.1+ GCTTTTGGTCTGGCCTGCTTGCATCTCC  
ERR117156.1297884.2+ TTTGGTCTGGCCTGCTTGCATCTCC  
ERR117156.16352577.2+ TTTGGTCTGGCCTGCTTGCATCTCC  
ERR117157.38560318.2+ TTTGGTCTGGCCTGCTTGCATCTCC  
ERR117158.9230335.2+ TTTGGTCTGGCCTGCTTGCATCTCC  
ERR117188.5462950.1- TTTGGTCTGGCCTGCTTGCATCTCC  
ERR117188.5463136.1- TTTGGTCTGGCCTGCTTGCATCTCC  
ERR117195.16676120.2- TTTGGTCTGGCCTGCTTGCATCTCC  
ERR117211.10960067.1+ TTTGGTCTGGCCTGCTTGCATCTCC  
ERR117167.12360378.1+ TCTGGCCTGCTTGCATCTCC  
ERR117170.1901259.2+ TCTGGCCTGCTTGCATCTCC  
ERR117170.6017029.1- TCTGGCCTGCTTGCATCTCC  
ERR117170.7975740.2+ TGGCCTGCTTGCATCTCC  
ERR117190.31524659.2+ TGGCCTGCTTGCATCTCC  
ERR117162.21063772.1- CCTGCTTGCATCTCC  
ERR117156.12339954.1+ CTGCTTGCATCTCC  
ERR117156.14079381.1+ CTGCTTGCATCTCC  
ERR117156.15679746.1+ CTGCTTGCATCTCC  
ERR117156.1899448.1+ CTGCTTGCATCTCC  
ERR117156.27998490.1+ CTGCTTGCATCTCC  
ERR117156.384374.1+ CTGCTTGCATCTCC  
ERR117156.412636.1+ CTGCTTGCATCTCC  
ERR117156.51082258.1+ CTGCTTGCATCTCC  
ERR117156.55492752.1+ CTGCTTGCATCTCC  
ERR117156.686079.1+ CTGCTTGCATCTCC  
ERR117157.10175429.1+ CTGCTTGCATCTCC  
ERR117157.21083951.1+ CTGCTTGCATCTCC  
ERR117157.35348797.1+ CTGCTTGCATCTCC  
ERR117157.47818519.1+ CTGCTTGCATCTCC  
ERR117157.48178658.1+ CTGCTTGCATCTCC  
ERR117157.48288776.1+ CTGCTTGCATCTCC  
ERR117157.52982400.1+ CTGCTTGCATCTCC  
ERR117157.6127110.1+ CTGCTTGCATCTCC  
ERR117162.19230106.1+ CTGCTTGCATCTCC  
ERR117172.10868533.2- TGCTTGCATCTCC  
ERR117186.6868637.1+ GCTTGCATCTCC  
ERR117168.8755584.1- TGCATCTCC  
ERR117169.2607605.1- TCC

ERR117195.20988009.2- TCC  
ERR117172.19560183.2- CC  
ERR117186.13986380.1- CC  
ERR117187.9292650.1- CC  
ERR117194.922317.2- C

consensus CAAGAAAATGCTCTTCTCTAGTTCCTCTCATGCTTTTGTCTGGCCTGCTTGCATCTCC

. : . : . : . : . : . :  
ERR117187.1846104.1+ CCTGCTGCGTTTCCCCA  
ERR117209.2234770.2+ CCTGCTGCGTTTCCCCACC  
ERR117153.26125281.2+ CCTGCTGCGTTTCCCCACCT  
ERR117154.46542049.2+ CCTGCTGCGTTTCCCCACCT  
ERR117154.7676116.2+ CCTGCTGCGTTTCCCCACCT  
ERR117155.48606278.2+ CCTGCTGCGTTTCCCCACCT  
ERR117153.25248628.2+ CCTGCTGCGTTTCCCCACCTT  
ERR117153.28715906.2+ CCTGCTGCGTTTCCCCACCTT  
ERR117153.39929989.2+ CCTGCTGCGTTTCCCCACCTT  
ERR117153.50977464.2+ CCTGCTGCGTTTCCCCACCTT  
ERR117153.52435271.1+ CCTGCTGCGTTTCCCCACCTT  
ERR117153.9559693.1+ CCTGCTGCGTTTCCCCACCTT  
ERR117154.24132143.2+ CCTGCTGCGTTTCCCCACCTT  
ERR117154.28182887.1+ CCTGCTGCGTTTCCCCACCTT  
ERR117154.32244393.2+ CCTGCTGCGTTTCCCCACCTT  
ERR117154.51549766.2+ CCTGCTGCGTTTCCCCACCTT  
ERR117154.52572361.2+ CCTGCTGCGTTTCCCCACCTT  
ERR117154.53521277.1+ CCTGCTGCGTTTCCCCACCTT  
ERR117154.55843371.2+ CCTGCTGCGTTTCCCCACCTT  
ERR117155.1676696.1+ CCTGCTGCGTTTCCCCACCTT  
ERR117155.24901097.2+ CCTGCTGCGTTTCCCCACCTT  
ERR117155.27398178.1+ CCTGCTGCGTTTCCCCACCTT  
ERR117155.30544527.2+ CCTGCTGCGTTTCCCCACCTT  
ERR117155.32031392.1+ CCTGCTGCGTTTCCCCACCTT  
ERR117155.35114720.1+ CCTGCTGCGTTTCCCCACCTT  
ERR117155.56017163.2+ CCTGCTGCGTTTCCCCACCTT  
ERR117155.58927721.1+ CCTGCTGCGTTTCCCCACCTT  
ERR117155.5975449.2+ CCTGCTGCGTTTCCCCACCTT  
ERR117172.15932939.1- CCTGCTGCGTTTCCCCACCTT  
ERR117189.3627525.1+ CCTGCTGCGTTTCCCCACCTT  
ERR117162.15239877.1- CCTGCTGCGTTTCCCCACCTTCC  
ERR117162.17731664.1- CCTGCTGCGTTTCCCCACCTTCC  
ERR117162.20390690.1- CCTGCTGCGTTTCCCCACCTTCC  
ERR117188.6260249.1- CCTGCTGCGTTTCCCCACCTTCTG  
ERR117162.24743150.1+ CCTGCTGCGTTTCCCCACCTTCCCTGG  
ERR117190.4710130.1- CCTGCTGCGTTTCCCCACCTTCCCTGGATCCTTCCAG  
ERR117167.13563954.1+ CCTGCTGCGTTTCCCCACCTTCCCTGGATCCTTCCAGCAT  
ERR117184.14295738.2- CCTGCTGCGTTTCCCCACCTTCCCTGGATCCTTCCAGCAT  
ERR117187.8211208.1- CCTGCTGCGTTTCCCCACCTTCCCTGGATCCTTCCAGCATGTT  
ERR117189.16427324.1+ CCTGCTGCGTTTCCCCACCTTCCCTGGATCCTTCCAGCATGTT  
ERR117189.16427324.2- CCTGCTGCGTTTCCCCACCTTCCCTGGATCCTTCCAGCATGTT  
ERR117186.15182709.1- CCTGCTGCGTTTCCCCAGCTTCCCTGGATCCTTCCAGCATGTTCTACCT  
ERR117186.19827414.1- CCTGCTGCGTTTCCCCACCTTCCCTGGATCCTTCCAGCATGTTCTACCT  
ERR117187.13695262.1- CCTGCTGCGTTTCCCCACCTTCCCTGGATCCTTCCAGCATGTTCTACCT  
ERR117190.26390213.1- CCTGCTGCGTTTCCCCACCTTCCCTGGATCCTTCCAGCATGTTCTACCT  
ERR117201.2485870.1- CCTGCTGCGTTTCCCCACCTTCCCTGGATCCTTCCAGCATGTTCTACCT  
ERR117169.908271.1- CCTGCTGCGTTTCCCCACCTTCCCTGGATCCTTCCAGCATGTTCTACCTC  
ERR117189.17247817.1+ CCTGCTGCGTTTCCCCACCTTCCCTGGATCCTTCCAGCATGTTCTACCTC  
ERR117168.6760065.1+ CCTGCTGCGTTTCCCCACCTTCCCTGGATCCTTCCAGCATGTTCTACCTCTG  
ERR117185.11582461.2- CCTGCTGCGTTTCCCCACCTTCCCTGGATCCTTCCAGCATGTTCTACCTCTG  
ERR117191.3942459.1+ CCTGCTGCGTTTCCCCACCTTCCCTGGATCCTTCCAGCATGTTCTACCTCTGCT  
ERR117160.9073880.1- CCTGCTGCGTTTCCCCACCTTCCCTGGATCCTTCCAGCATGTTCTACCTCTGCTG  
ERR117162.29804872.1- CCTGCTGCGTTTCCCCACCTTCCCTGGATCCTTCCAGCATGTTCTCCCTCTGCTG  
ERR117171.21382053.1+ CCTGCTGCGTTTCCCCACCTTCCCGGATCCTTCCAGCACGTTCTACCTCTGCTG  
ERR117156.1297884.2+ CCTGCTGCGTTTCCCCACCTTCCCTGGATCCTTCCAGCATGTTCTACCTCTGCTGG  
ERR117156.16352577.2+ CCTGCTGCGTTTCCCCACCTTCCCTGGATCCTTCCAGCATGTTCTACCTCTGCTGG  
ERR117157.38560318.2+ CCTGCTGCGTTTCCCCACCTTCCCTGGATCCTTCCAGCATGTTCTACCTCTGCTGG  
ERR117170.149546.1- CCTGCTGCGTTTCCCCACCTTCCCTGGATCCTTCCAGCATGTTCTACCTCTGCTGG  
ERR117186.14041801.1+ CCTGCTGCGTTTCCCCACCTTCCCTGGATCCTTCCAGCATGTTCTACCTCTGCTGG  
ERR117214.14172132.2+ ACTGCTGCGTTTCCCCACCTTCCCTGGATCCTTCCAGCATGTTCTACCTCTGCTGGG  
ERR117190.38583922.2+ CCTGCTGCGTTTCCCCACCTTCCCTGGATCCTTCCAGCATGTTCTACCTCTGCTGGGA  
ERR117168.17100909.1- CCTGCTGCGTTTCCCCACCTTCCCTGGATCCTTCCAGCATGTTCTACCTCTGCTGGGAC  
ERR117172.12496667.1- CCTGCTGCGTTTCCCCACCTTCCCTGGATCCTTCCAGCATGTTCTACCTCTGCTGGGAC  
ERR117195.16676120.2- CCTACTGCGTTTCCCCACCTTCCCTGGATCCTTCCAGCATGTTCTACCTCTGCTGGGACC  
ERR117156.12339954.1+ CCTGCTGCGTTTCCCCACCTTCCCTGGATCCTTCCAGCATGTTCTACCTCTGCTGGGACCA  
ERR117156.14079381.1+ CCTGCTGCGTTTCCCCACCTTCCCTGGATCCTTCCAGCATGTTCTACCTCTGCTGGGACCA  
ERR117156.15679746.1+ CCTGCTGCGTTTCCCCACCTTCCCTGGATCCTTCCAGCATGTTCTACCTCTGCTGGGACCA  
ERR117156.1899448.1+ CCTGCTGCGTTTCCCCACCTTCCCTGGATCCTTCCAGCATGTTCTACCTCTGCTGGGACCA  
ERR117156.27998490.1+ CCTGCTGCGTTTCCCCACCTTCCCTGGATCCTTCCAGCATGTTCTACCTCTGCTGGGACCA  
ERR117156.384374.1+ CCTGCTGCGTTTCCCCACCTTCCCTGGATCCTTCCAGCATGTTCTACCTCTGCTGGGACCA  
ERR117156.412636.1+ CCTGCTGCGTTTCCCCACCTTCCCTGGATCCTTCCAGCATGTTCTACCTCTGCTGGGACCA  
ERR117156.51082258.1+ CCTGCTGCGTTTCCCCACCTTCCCTGGATCCTTCCAGCATGTTCTACCTCTGCTGGGACCA  
ERR117156.55492752.1+ CCTGCTGCGTTTCCCCACCTTCCCTGGATCCTTCCAGCATGTTCTACCTCTGCTGGGACCA  
ERR117156.686079.1+ CCTGCTGCGTTTCCCCACCTTCCCTGGATCCTTCCAGCATGTTCTACCTCTGCTGGGACCA  
ERR117157.10175429.1+ CCTGCTGCGTTTCCCCACCTTCCCTGGATCCTTCCAGCATGTTCTACCTCTGCTGGGACCA

ERR117157.21083951.1+ CCTGCTGCGTTTCCCCACCTTCCTGGATCCTTCCAGCATGTTCTACCTCTGCTGGGACCA  
ERR117157.35348797.1+ CCTGCTGCGTTTCCCCACCTTCCTGGATCCTTCCAGCATGTTCTACCTCTGCTGGGACCA  
ERR117157.47818519.1+ CCTGCTGCGTTTCCCCACCTTCCTGGATCCTTCCAGCATGTTCTACCTCTGCTGGGACCA  
ERR117157.48178658.1+ CCTGCTGCGTTTCCCCACCTTCCTGGATCCTTCCAGCATGTTCTACCTCTGCTGGGACCA  
ERR117157.48288776.1+ CCTGCTGCGTTTCCCCACCTTCCTGGATCCTTCCAGCATGTTCTACCTCTGCTGGGACCA  
ERR117157.52982400.1+ CCTGCTGCGTTTCCCCACCTTCCTGGATCCTTCCAGCATGTTCTACCTCTGCTGGGACCA  
ERR117157.6127110.1+ CCTGCTGCGTTTCCCCACCTTCCTGGATCCTTCCAGCATGTTCTACCTCTGCTGGGACCA  
ERR117158.24629168.2- CCTGCTGCGTTTCCCCACCTTCCTGGATCCTTCCAGCATGTTCTACCTCTGCTGGGACCA  
ERR117158.4154112.1+ CCTGCTGCGTTTCCCCACCTTCCTGGATCCTTCCAGCATGTTCTACCTCTGCTGGGACCA  
ERR117158.9230335.2+ ACTGCTGCGTTTCCCCACCTTCCTGGATCCTTCCAGCATGTTCTACCTCTGCTGGGACCA  
ERR117160.6004183.1+ CCTGCTGCGTTTCCCCACCTTCCTGGATCCTTCCAGCATGTTCTACCTCTGCTGGGACCA  
ERR117162.19230106.1+ CCTGCTGCGTTTCCCCACCTTCCTGGATCCTTCCAGCATGTTCTACCTCTGCTGGGACCA  
ERR117162.21063772.1- CCGGTGCGTTTCCCCACCTTCCTGGATCCTTCCAGCATGTTCTACCTCTGCTGGGACCA  
ERR117167.12360378.1+ CCTGCTGCGTTTCCCCACCTTCCTGGATCCTTCCAGCATGTTCTACCTCTGCTGGGACCA  
ERR117167.544228.1+ CCTGCTGCGTTTCCCCACCTTCCTGGATCCTTCCAGCATGTTCTACCTCTGCTGGGACCA  
ERR117168.8755584.1- CCTGCTGCGTTTCCCCACCTTCCTGGATCCTTCCAGCATGTTCTACCTCTGCTGGGACCA  
ERR117169.2607605.1- CCTTCTGCGTTTCCCCACCTTCCTGGATCCTTCCAGCATGTTCTACCTCTGCTGGGACCA  
ERR117170.11495570.1+ CCTGCTGCGTTTCCCCACCTTCCTGGATCCTTCCAGCATGTTCTACCTCTGCTGGGACCA  
ERR117170.12478522.2+ CCTGCTGCGTTTCCCCACCTTCCTGGATCCTTCCAGCATGTTCTACCTCTGCTGGGACCA  
ERR117170.1901259.2+ CCTGCTGCGTTTCCCCACCTTCCTGGATCCTTCCAGCATGTTCTACCTCTGCTGGGACCA  
ERR117170.6017029.1- CCTGCTGCGTTTCCCCACCTTCCTGGATCCTTCCAGCATGTTCTACCTCTGCTGGGACCA  
ERR117170.7975740.2+ CCTGCTGCGTTTCCCCACCTTCCTGGATCCTTCCAGCATGTTCTACCTCTGCTGGGACCA  
ERR117172.10868533.2- CCTGCTGCGTTTCCCCACCTTCCTGGATCCTTCCAGCATGTTCTACCTCTGCTGGGACCA  
ERR117172.1851309.1+ CCTGCTGCGTTTCCCCACCTTCCTGGATCCTTCCAGCATGTTCTACCTCTGCTGGGACCA  
ERR117172.19560183.2- CCTGCTGCGTTTCCCCACCTTCCTGGATCCTTCCAGCATGTTCTACCTCTGCTGGGACCA  
ERR117173.12302743.2+ CCTGCTGCGTTTCCCCACCTTCCTGGATCCTTCCAGCATGTTCTACCTCTGCTGGGACCA  
ERR117173.1405665.2- CCTGCTGCGTTTCCCCACCTTCCTGGATCCTTCCAGCATGTTCTACCTCTGCTGGGACCA  
ERR117173.232780.1+ CCTGCTGCGTTTCCCCACCTTCCTGGATCCTTCCAGCATGTTCTACCTCTGCTGGGACCA  
ERR117186.13986380.1- CCTGCTGCGTTTCCCCACCTTCCTGGATCCTTCCAGCATGTTCTACCTCTGCTGGGACCA  
ERR117186.21463358.2+ CCTGCTGCGTTTCCCCACCTTCCTGGATCCTTCCAGCATGTTCTACCTCTGCTGGGACCA  
ERR117186.4205347.1- CCTGCTGCGTTTCCCCACCTTCCTGGATCCTTCCAGCATGTTCTACCTCTGCTGGGACCA  
ERR117186.6868637.1+ CCTGCTGCGTTTCCCCACCTTCCTGGATCCTTCCAGCATGTTCTACCTCTGCTGGGACCA  
ERR117187.9292650.1- CCTGCTGCGTTTCCCCACCTTCCTGGATCCTTCCAGCATGTTCTACCTCTGCTGGGACCA  
ERR117188.5462950.1- CCTGCTGCGTTTCCCCACCTTCCTGGATCCTTCCAGCATGTTCTACCTCTGCTGGGACCA  
ERR117188.5463136.1- CCTGCTGCGTTTCCCCACCTTCCTGGATCCTTCCAGCATGTTCTACCTCTGCTGGGACCA  
ERR117189.19092939.2+ CCTGCTGCGTTTCCCCACCTTCCTGGATCCTTCCAGCATGTTCTACCTCTGCTGGGACCA  
ERR117190.29386046.1+ CCTGCTGCGTTTCCCCACCTTCCTGGATCCTTCCAGCATGTTCTACCTCTGCTGGGACCA  
ERR117190.31524659.2+ CCTGCTGCGTTTCCCCACCTTCCTGGATCCTTCCAGCATGTTCTACCTCTGCTGGGACCA  
ERR117194.922317.2- CCTGCTGCGTTTCCCCACCTTCCTGGATCCTTCCAGCATGTTCTACCTCTGCTGGGACCA  
ERR117195.13433153.1+ CCTGCTGCGTTTCCCCACCTTCCTGGATCCTTCCAGCATGTTCTACCTCTGCTGGGACCA  
ERR117195.13585097.1- CCTGCTGCGTTTCCCCACCTTCCTGGATCCTTCCAGCATGTTCTACCTCTGCTGGGACCA  
ERR117195.13729654.1+ CCTGCTGCGTTTCCCCACCTTCCTGGATCCTTCCAGCATGTTCTACCTCTGCTGGGACCA  
ERR117195.13884831.1+ CCTGCTGCGTTTCCCCACCTTCCTGGATCCTTCCAGCATGTTCTACCTCTGCTGGGACCA  
ERR117195.19866522.1+ CCTGCTGCGTTTCCCCACCTTCCTGGATCCTTCCAGCATGTTCTACCTCTGCTGGGACCA  
ERR117195.20596627.1+ CCTGCTGCGTTTCCCCACCTTCCTGGATCCTTCCAGCATGTTCTACCTCTGCTGGGACCA  
ERR117195.20988009.2- CCTTCTGCGTTTCCCCACCTTCCTGGATCCTTCCAGCATGTTCTACCTCTGCTGGGACCA  
ERR117195.5115980.1- CCTGCTGCGTTTCCCCACCTTCCTGGATCCTTCCAGCATGTTCTACCTCTGCTGGGACCA  
ERR117195.6900905.1- CCTGCTGCGTTTCCCCACCTTCCTGGATCCTTCCAGCATGTTCTACCTCTGCTGGGACCA  
ERR117195.6901054.1- CCTGCTGCGTTTCCCCACCTTCCTGGATCCTTCCAGCATGTTCTACCTCTGCTGGGACCA  
ERR117195.8720933.1- CCTGCTGCGTTTCCCCACCTTCCTGGATCCTTCCAGCATGTTCTACCTCTGCTGGGACCA  
ERR117203.460754.1- CCTGCTGCGTTTCCCCACCTTCCTGGATCCTTCCAGCATGTTCTACCTCTGCTGGGACCA  
ERR117207.3319922.1- CCTGCTGCGTTTCCCCACCTTCCTGGATCCTTCCAGCATGTTCTACCTCTGCTGGGACCA  
ERR117209.2148070.1+ CCTGCTGCGTTTCCCCACCTTCCTGGATCCTTCCAGCATGTTCTACCTCTGCTGGGACCA  
ERR117211.10510244.1+ CCTGCTGCGTTTCCCCACCTTCCTGGATCCTTCCAGCATGTTCTACCTCTGCTGGGACCA  
ERR117211.10960067.1+ CCTGCTGCGTTTCCCCACCTTCCTGGATCCTTCCAGCATGTTCTACCTCTGCTGGGACCA  
ERR117211.11635529.1+ CCTGCTGCGTTTCCCCACCTTCCTGGATCCTTCCAGCATGTTCTACCTCTGCTGGGACCA  
ERR117212.8693972.1- CCTGCTGCGTTTCCCCACCTTCCTGGATCCTTCCAGCATGTTCTACCTCTGCTGGGACCA  
ERR117213.10610064.2+ ACTGCTGCGTTTCCCCACCTTCCTGGATCCTTCCAGCATGTTCTACCTCTGCTGGGACCA  
ERR117213.20630415.2- ACTGCTGCGTTTCCCCACCTTCCTGGATCCTTCCAGCATGTTCTACCTCTGCTGGGACCA  
ERR117214.14172132.1- CCTGCTGCGTTTCCCCACCTTCCTGGATCCTTCCAGCATGTTCTACCTCTGCTGGGACCA  
ERR117185.7576876.1- TGCTGCGTTTCCCCACCTTCCTGGATCCTTCCAGCATGTTCTACCTCTGCTGGGACCA  
ERR117186.13703774.1- TGCTGCGTTTCCCCACCTTCCTGGATCCTTCCAGCATGTTCTACCTCTGCTGGGACCA  
ERR117185.14382460.1+ GCTGCGTTTCCCCACCTTCCTGGATCCTTCCAGCATGTTCTACCTCTGCTGGGACCA  
ERR117187.481263.1- GCTGCGTTTCCCCACCTTCCTGGATCCTTCCAGCATGTTCTACCTCTGCTGGGACCA  
ERR117196.3093370.1+ GCTGCGTTTCCCCACCTTCCTGGATCCTTCCAGCATGTTCTACCTCTGCTGGGACCA  
ERR117213.70641.1+ GCTGCGTTTCCCCACCTTCCTGGATCCTTCCAGCATGTTCTACCTCTGCTGGGACAA  
ERR117161.30642625.1+ CTGCGTTTCCCCACCTTCCTGGATCCTTCCAGCATGTTCTACCTCTGCTGGGACCA  
ERR117173.10378971.1+ TGCGTTTCCCCACCTTCCTGGATCCTTCCAGCATGTTCTACCTCTGCTGGGACCA  
ERR117191.1712169.1- GCGTTTCCCCCGCTTNCCTGGATCCTTCCAGCATGTTCTACCTCTGCTGGGACCA  
ERR117170.17484957.2+ CGTTTCCCCACCTTCCTGGATCCTTCCAGCATGTTCTACCTCTGCTGGGACCA  
ERR117192.4993405.1+ CGTTTCCCCACCTTCCTGGATCCTTCCAGCATGTTCTACCTCTGCTGGGACCA  
ERR117162.23912075.1+ GTTTCCTGGATCCTTCCAGCATGTTCTACCTCTGCTGGGACCA  
ERR117173.14111596.1+ GTTTCCTGGATCCTTCCAGCATGTTCTACCTCTGCTGGGACCA  
ERR117197.6040782.1+ GTTTCCTGGATCCTTCCAGCATGTTCTACCTCTGCTGGGACCA  
ERR117189.29044564.1- TTTCCCCACCTTCCTGGATCCTTCCAGCATGTTCTACCTCTGCTGGGACCA  
ERR117170.4755144.1- TCCCCACCTTCCTGGATCCTTCCAGCATGTTCTACCTCTGCTGGGACCA  
ERR117211.3135314.2+ TCCCCACCTTCCTGGATCCTTCCAGCATGTTCTACCTCTGCTGGGACCA  
ERR117200.106648.1+ CCCACCTTCCTGGATCCTTCCAGCATGTTCTACCTCTGCTGGGACCA  
ERR117208.1138650.2- CCCACCTTCCTGGATCCTTCCAGCATGTTCTACCTCTGCTGGGACCA  
ERR117212.13913207.2+ CCCACCTTCCTGGATCCTTCCAGCATGTTCTACCTCTGCTGGGACCA  
ERR117197.421777.1- CCCACCTTCCTGGATCCTTCCAGCATGTTCTACCTCTGCTGGGACCA  
ERR117190.5382735.1+ TTCTGCGTTTCCCCACCTTCCTGGATCCTTCCAGCATGTTCTACCTCTGCTGGGACCA  
ERR117213.24762755.1- CCTGCTGCGTTTCCCCACCTTCCTGGATCCTTCCAGCATGTTCTACCTCTGCTGGGACCA  
ERR117157.48953716.1- CTGGATCCTTCCAGCATGTTCTACCTCTGCTGGGACCA

|                       |                                       |
|-----------------------|---------------------------------------|
| ERR117190.29798443.1- | TGGATCCTTCCAGCATGTTCTACCTCTGCTGGGACCA |
| ERR117159.22106723.1+ | GATCCTTCCAGCATGTTCTACCTCTGCTGGGACCA   |
| ERR117188.12796779.1+ | GATCCTTCCAGCATGTTCTACCTCTGCTGGGACCA   |
| ERR117161.21646014.1- | ATCCTTCCAGCATGTTCTACCTCTGCTGGGACCA    |
| ERR117186.7854080.1-  | TCCTTCCAGCATGTTCTACCTCTGCTGGGACCA     |
| ERR117160.14580897.1+ | CTTCCAGCATGTTCTACCTCTGCTGGGACCA       |
| ERR117205.20017840.1+ | CTTCCAGCATGTTCTACCTCTGCTGGGACCA       |
| ERR117205.3454310.1+  | CTTCCAGCATGTTCTACCTCTGCTGGGACCA       |
| ERR117162.7505659.1-  | CAGCATGTTTCGACCTCTGCTGGGACCG          |
| ERR117168.6995690.1-  | GCATGTTCTCCCTCTGCTGGGACCA             |
| ERR117170.3438595.2+  | GCATGTTCTACCTCTGCTGGGACCA             |
| ERR117211.8033843.2-  | GCATGTTCTACCTCGGCTGGGCCCA             |
| ERR117169.1769409.1+  | CATGTTCTACCTCTGCTGGGACCA              |
| ERR117172.25891693.1+ | ATGTTCTACCTCTGCTGGGACCA               |
| ERR117191.5032878.2+  | ATGTTCTACCTCTGCTGGGACCA               |
| ERR117189.19822430.1+ | TGTTCTACCTCTGCTGGGACCA                |
| ERR117214.17283903.1- | TTCTACCTCTGCTGGGCCCA                  |
| ERR117168.9275607.1+  | CTACCTCTGCTGGGACCA                    |
| ERR117210.12667077.1+ | TACCTCTGCTGGGACCA                     |
| ERR117210.15363689.1+ | TACCTCTGCTGGGACCA                     |
| ERR117210.19301345.1+ | TACCTCTGCTGGGACCA                     |
| ERR117210.2000732.1+  | TACCTCTGCTGGGACCA                     |
| ERR117210.20471729.1+ | TACCTCTGCTGGGACCA                     |
| ERR117210.21361233.1+ | TACCTCTGCTGGGACCA                     |
| ERR117160.14706551.1- | CCCTGTGCTGGGACCG                      |
| ERR117158.4821344.1+  | CCTCTGCTGGGACCA                       |
| ERR117172.21418257.2- | CCTCTGCGGGGACCA                       |
| ERR117159.18195311.1+ | TCTGCTGGGACCA                         |
| ERR117189.15711126.2- | CTGCTGGGACCA                          |
| ERR117195.16895887.2- | CTGCTGGGACCA                          |
| ERR117171.7573199.1+  | TGCTGGGACCA                           |
| ERR117171.11301750.1- | GCTGGGACCA                            |
| ERR117193.5201767.1-  | GCTGGGACCA                            |
| ERR117195.17135423.1- | GCTGGGACCA                            |
| ERR117160.876206.1-   | CGGGGACCA                             |
| ERR117189.5341307.2-  | CTGGGACCA                             |
| ERR117195.7556643.1-  | CGGGGACCA                             |
| ERR117199.6229760.2+  | TGGGACCA                              |
| ERR117158.14364574.1- | GGGACCA                               |
| ERR117185.1830563.1+  | GACCA                                 |
| ERR117214.5815958.1+  | GCCCA                                 |
| ERR117191.5032878.1-  | ACCA                                  |
| ERR117193.4247774.2-  | CCA                                   |
| ERR117153.23642243.1+ | CA                                    |
| ERR117153.55281904.1+ | CA                                    |
| ERR117154.19671490.1+ | CA                                    |
| ERR117154.51411665.1+ | CA                                    |
| ERR117154.6725085.1+  | CA                                    |
| ERR117155.1262030.1+  | CA                                    |
| ERR117155.31097123.1+ | CA                                    |
| ERR117155.39985310.1+ | CA                                    |
| ERR117155.44201871.1+ | CA                                    |

consensus

CCTGCTGCGTTTCCACCTTCCTGGATCCTTCCAGCATGTTCTACCTCTGCTGGGACCA

|                       |                |
|-----------------------|----------------|
| ERR117167.544228.1+   | C              |
| ERR117173.232780.1+   | CA             |
| ERR117189.19092939.2+ | CA             |
| ERR117190.29386046.1+ | CAA            |
| ERR117172.1851309.1+  | CAAG           |
| ERR117156.12339954.1+ | CAAGGA         |
| ERR117156.14079381.1+ | CAAGGA         |
| ERR117156.15679746.1+ | CAAGGA         |
| ERR117156.1899448.1+  | CAAGGA         |
| ERR117156.27998490.1+ | CAAGGA         |
| ERR117156.384374.1+   | CAAGGA         |
| ERR117156.412636.1+   | CAAGGA         |
| ERR117156.51082258.1+ | CAAGGA         |
| ERR117156.55492752.1+ | CAAGGA         |
| ERR117156.686079.1+   | CAAGGA         |
| ERR117157.10175429.1+ | CAAGGA         |
| ERR117157.21083951.1+ | CAAGGA         |
| ERR117157.35348797.1+ | CAAGGA         |
| ERR117157.47818519.1+ | CAAGGA         |
| ERR117157.48178658.1+ | CAAGGA         |
| ERR117157.48288776.1+ | CAAGGA         |
| ERR117157.52982400.1+ | CAAGGA         |
| ERR117157.6127110.1+  | CAAGGA         |
| ERR117173.12302743.2+ | CAAGGAACA      |
| ERR117170.12478522.2+ | CAAGGCACAG     |
| ERR117212.8693972.1-  | CAAGGAACAGG    |
| ERR117211.10510244.1+ | CAAGGAACAGGA   |
| ERR117213.20630415.2- | CAAGGAACAGGAGC |

ERR117186.4205347.1- CAAGGAACAGGAGCTG  
ERR117188.5462950.1- CAAGGAACAGGAGCTG  
ERR117188.5463136.1- CAAGGAACAGGAGCTG  
ERR117170.11495570.1+ CAAGGAACAGGAGCTGAT  
ERR117203.460754.1- CAAGGAACAGGAGCTGAT  
ERR117172.19560183.2- CAAGGAACAGGAGCTGATG  
ERR117173.1405665.2- CAAGGAACAGGAGCTGATG  
ERR117186.21463358.2+ CAAGGAACAGGAGCTGATG  
ERR117160.6004183.1+ CAAGGAACAGGAGCTGATGGG  
ERR117190.31524659.2+ CAAGGAACAGGAGCTGATGGGG  
ERR117195.13884831.1+ CAAGGAACAGGAGCTGATGGGG  
ERR117214.14172132.1- CAAGGAACAGGAGCTGATGGGGTT  
ERR117214.17283903.1- CAAGGAACAGGAGCTGATGGGGTTG  
ERR117195.13433153.1+ CAAGGAACAGGAGCTGCTGGGGTTGA  
ERR117195.19866522.1+ CAAGGAACAGGAGCTCATGGGGTTGA  
ERR117195.20596627.1+ CAAGGAACAGGAGCTGATGGGGTTGA  
ERR117167.12360378.1+ CAAGGAACAGGAGCTGATGGGGTTGAGCT  
ERR117170.1901259.2+ CAAGGAACAGGAGCTGATGGGGTTGAGCT  
ERR117170.6017029.1- CAAGGAACAGGAGCTGATGGGGTTGAGCT  
ERR117195.13729654.1+ CAAGGAACAGGAGCTGATGGGGTTGAGCT  
ERR117211.11635529.1+ CAAGGAACAGGAGCTGATGGGGTTGAGCTG  
ERR117158.24629168.2- CAAGGAACAGGAGCTGATGGGGTTGAGCTGC  
ERR117170.7975740.2+ CAAGGAACAGGAGCTGATGGGGTTGAGCTGC  
ERR117162.21063772.1- CAAGGAACAGGAGCTGATGGGGTTGAGCTGCACA  
ERR117213.10610064.2+ CAAGGACAGGAGCTGATGGGGTTGAGCTGCACA  
ERR117158.4154112.1+ CAAGGAACAGGAGCTGATGGGGTTGAGCTGCACAT  
ERR117162.19230106.1+ CAAGGAACAGGAGCTGATGGGGTTGAGCTGCACAT  
ERR117168.8755584.1- CAAGGAACAGGAGCTGATGGGGTTGAGCTGCACATC  
ERR117172.10868533.2- CAAGGAACAGGAGCTGATGGGGTTGAGCTGCACATC  
ERR117186.6868637.1+ CAAGGAACAGGAGCTGATGGGGTTGAGCTGCACATCC  
ERR117187.9292650.1- CAAGGAACAGGAGCTGATGGGGTTGAGCTGCACATCCA  
ERR117195.6900905.1- CAAGGAACAGGAGCTGATGGGGTTGAGCTGCACATCCA  
ERR117195.6901054.1- CAAGGAACAGGAGCTGATGGGGTTGAGCTGCACATCCA  
ERR117186.13986380.1- CAAGGAACAGGAGCTGATGGGGTTGAGCTGCACATCCACA  
ERR117157.48953716.1- CAAGGAACAGGAGCTGATGGGGTTGAGCTGCACATCCACACA  
ERR117189.5341307.2- CAAGGAACAGGAGCTGATGGGGTTGAGCTGCACATCCACACA  
ERR117187.481263.1- CAAGGAACAGGAGCTGATGGGGTTGAGCTGCACATCCACACAA  
ERR117207.3319922.1- CAAGGAACAGGAGCTGATGGGGTTGAGCTGCACATCCACACA  
ERR117169.2607605.1- CAAGGAACAGGAGCTGATGGGGTTGAGCTGCACATCCACACA  
ERR117195.5115980.1- CAAGGAACAGGAGCTGATGGGGTTGAGCTGCACATCCACACA  
ERR117189.29044564.1- CAAGGAACAGGAGCTGATGGGGTTGAGCTGCACATCCACACA  
ERR117158.9230335.2+ CAAGGAACAGGAGCTGATGGGGTTGAGCTGCACATCCACACA  
ERR117185.7576876.1- CAAGGAACAGGAGCTGATGGGGTTGAGCTGCACATCCACACA  
ERR117186.13703774.1- CAAGGAACAGGAGCTGATGGGGTTGAGCTGCACATCCACACA  
ERR117173.10378971.1+ AAAGGAACAGGAGCTGATGCGGTTGAGCTGCACATCCACACA  
ERR117185.14382460.1+ CAAGGAACAGGAGCTGCTGGGGTTGAGCTGCCATCCACACC  
ERR117161.30642625.1+ CAAGGAACAGGAGCTGATGGGGTTGAGCTGCACATCCACACA  
ERR117173.14111596.1+ CAAGGAACAGGAGCTGATGGGGTTGAGCTGCACATCCACACA  
ERR117170.17484957.2+ CAAGGAACAGGAGCTGATGGGGTTGAGCTGCACATCCACACA  
ERR117162.23912075.1+ CAAGGAACAGGAGCTGATGGGGTTGAGCTGCACATCCACACA  
ERR117211.10960067.1+ CAAGGAACAGGAGCTGATGGGGTTGAGCTGCACATCCACACA  
ERR117190.5382735.1+ CAAGGAACAGGAGCTGATGGGGTTGAGCTGCACATCCACACA  
ERR117153.23642243.1+ CAAGGAACAGGAGCTGATGGGGTTGAGCTGCACATCCACACA  
ERR117153.55281904.1+ CAAGGAACAGGAGCTGATGGGGTTGAGCTGCACATCCACACA  
ERR117154.19671490.1+ CAAGGAACAGGAGCTGATGGGGTTGAGCTGCACATCCACACA  
ERR117154.51411665.1+ CAAGGAACAGGAGCTGATGGGGTTGAGCTGCACATCCACACA  
ERR117154.6725085.1+ CAAGGAACAGGAGCTGATGGGGTTGAGCTGCACATCCACACA  
ERR117155.1262030.1+ CAAGGAACAGGAGCTGATGGGGTTGAGCTGCACATCCACACA  
ERR117155.31097123.1+ CAAGGAACAGGAGCTGATGGGGTTGAGCTGCACATCCACACA  
ERR117155.39985310.1+ CAAGGAACAGGAGCTGATGGGGTTGAGCTGCACATCCACACA  
ERR117155.44201871.1+ CAAGGAACAGGAGCTGATGGGGTTGAGCTGCACATCCACACA  
ERR117158.14364574.1- CAAGGAACAGGAGCTGATGGGGTTGAGCTGCACATCCACACA  
ERR117158.4821344.1+ CAAGGAACAGGAGCTGATGGGGTTGAGCTGCCATCCACACA  
ERR117159.10361209.1+ CAAGGAACAGGAGCTGATGGGGTTGAGCTGCACATCCACACA  
ERR117159.18195311.1+ CAAGGAACAGGAGCTGATGGGGTTGAGCTGCACATCCACACA  
ERR117159.22106723.1+ CAAGGAACAGGAGCTGATGGGGTTGAGCTGCACATCCACACA  
ERR117160.14580897.1+ CAAGGAACAGGAGCTGATGGGGTTGAGCTGCACATCCACACA  
ERR117160.14706551.1- CAAGGAACAGGAGCTGATGGGGTTGAGCTGCACATCCACACA  
ERR117160.876206.1- CAAGGAACAGGGGCTGAGGGGGTTGAGCTGCCATCCACACA  
ERR117161.10441001.1+ CAAGGAACAGGAGCTGATGGGGTTGAGCTGCACATCCACACA  
ERR117161.21646014.1- CAAGGAACAGGAGCTGATGGGGTTGAGCTGCACATCCACACA  
ERR117162.7505659.1- CAAGGAACAGGAGCTGATGGGGTTGAGCTGCACATCCACACA  
ERR117168.6995690.1- CAAGGAACAGGAGCTGATGGGGTTGAGCTGCACATCCACACA  
ERR117168.9275607.1+ CAAGGAACAGGAGCTGATGGGGTTGAGCTGCACATCCACACA  
ERR117169.1769409.1+ CAAGGAACAGGAGCTGATGGGGTTGAGCTGCACATCCACACA  
ERR117170.3438595.2+ CAAGGAACAGGAGCTGATGGGGTTGAGCTGCACATCCACACA  
ERR117170.4755144.1- CAAGGAACAGGAGCTGATGGGGTTGAGCTGCACATCCACACA  
ERR117171.11301750.1- CAAGGAACAGGAGCTGATGGGGTTGAGCTGCACATCCACACA  
ERR117171.7573199.1+ CAAGGAACAGGAGCTGATGGGGTTGAGCTGCACATCCACACA  
ERR117172.21418257.2- CAAGGAACAGGAGCTGATGGGGTTGAGCTGCACATCCACACA  
ERR117172.25891693.1+ CAAGGAACAGGAGCTGATGGGGTTGAGCTGCACATCCACACA  
ERR117185.1830563.1+ CAAGGAACAGGAGCTGATGGGGTTGAGCTGCACATCCACACA  
ERR117186.7854080.1- CAAGGAACAGGAGCTGATGGGGTTGAGCTGCACATCCACACA  
ERR117188.12796779.1+ CAAGGAACAGGAGCTGATGGGGTTGAGCTGCACATCCACACA

ERR117189.15711126.2- CCAGGAACAGGAGCTGATGGGGTTGAGCTGCACATCCACACAACCTGGCTGGGTGGCATCT  
ERR117189.19822430.1+ CAAGGAACAGGAGCTGATGGGGTTGAGCTGCACATCCACACAACCTGGCTGGGTGGCATCT  
ERR117190.29798443.1- CAAGGAACAGGAGCTGATGGGGTTGAGCTGCACATCCACACAACCTGGCTGGGTGGCATCT  
ERR117191.1712169.1- CAAGGAACAGGAGCTGATGGGGTTGAGCTGCACATCCACACAACCTGGCTGGGTGGCATCT  
ERR117191.5032878.1- CAAGGAACAGGAGCTGATGGGGTTGAGCTGCACATCCACACAACCTGGCTGGGTGGCATCT  
ERR117191.5032878.2+ CAAGGAACAGGAGCTGATGGGGTTGAGCTGCACATCCACACAACCTGGCTGGGTGGCATCT  
ERR117192.4993405.1+ CAAGGAACAGGAGCTGATGGGGTTGAGCTGCACATCCACACAACCTGGCTGGGTGGCATCT  
ERR117193.4247774.2- CAAGGAACAGGAGCTGATGGGGTTGAGCTGCACATCCACACAACCTGGCTGGGTGGCATCT  
ERR117193.5201767.1- CAAGGAACAGGAGCTGATGGGGTTGAGCTGCACATCCACACAACCTGGCTGGGTGGCATCT  
ERR117194.922317.2- CAAGGAACAGGAGCTGATGGGGTTGAGCTGCACATCCACACAACCTGGCTGGGTGGCATCT  
ERR117195.16895887.2- CAAGGAACAGGAGCTGATGGGGTTGAGCTGCACATCCACACAACCTGGCTGGGTGGCATCT  
ERR117195.17135423.1- CAGGGAACAGGAGCTGATGGGGTTGAGCTGCACATCCACACAACCTGGCTGGGTGGCATCT  
ERR117195.20988009.2- CAAGGAACAGGAGCTGATGGGGTTGAGCTGCACATCCACACAACCTGGCTGGGTGGCATCT  
ERR117195.7556643.1- CAAGGAACAGGAGCTGATGGGGTTGAGCTGCACATCCACACAACCTGGCTGGGTGGCATCT  
ERR117196.3093370.1+ CAAGGAACAGGAGCTGATGGGGTTGAGCTGCACATCCACACAACCTGGCTGGGTGGCATCT  
ERR117197.421777.1- CAAGGAACAGGAGCTGATGGGGTTGAGCTGCACATCCACACAACCTGGCTGGGTGGCATCT  
ERR117197.6040782.1+ CAAGGAACAGGAGCTGATGGGGTTGAGCTGCACATCCACACAACCTGGCTGGGTGGCATCT  
ERR117199.6229760.2+ CAAGGAACAGGAGCTGATGGGGTTGAGCTGCACATCCACACAACCTGGCTGGGTGGCATCT  
ERR117200.106648.1+ CAAGGAACAGGAGCTGATGGGGTTGAGCTGCACATCCACACAACCTGGCTGGGTGGCATCT  
ERR117205.20017840.1+ CAAGGAACAGGAGCTGATGGGGTTGAGCTGCACATCCACACAACCTGGCTGGGTGGCATCT  
ERR117205.3454310.1+ CAAGGAACAGGAGCTGATGGGGTTGAGCTGCACATCCACACAACCTGGCTGGGTGGCATCT  
ERR117208.1138650.2- CAAGGAACAGGAGCTGATGGGGTTGAGCTGCACATCCACACAACCTGGCTGGGTGGCATCT  
ERR117209.2148070.1+ CAAGGAACAGGAGCTGATGGGGTTGAGCTGCACATCCACACAACCTGGCTGGGTGGCATCT  
ERR117210.12667077.1+ CAAGGAACAGGAGCTGATGGGGTTGAGCTGCACATCCACACAACCTGGCTGGGTGGCATCT  
ERR117210.15363689.1+ CAAGGAACAGGAGCTGATGGGGTTGAGCTGCACATCCACACAACCTGGCTGGGTGGCATCT  
ERR117210.19301345.1+ CAAGGAACAGGAGCTGATGGGGTTGAGCTGCACATCCACACAACCTGGCTGGGTGGCATCT  
ERR117210.2000732.1+ CAAGGAACAGGAGCTGATGGGGTTGAGCTGCACATCCACACAACCTGGCTGGGTGGCATCT  
ERR117210.20471729.1+ CAAGGAACAGGAGCTGATGGGGTTGAGCTGCACATCCACACAACCTGGCTGGGTGGCATCT  
ERR117210.21361233.1+ CAAGGAACAGGAGCTGATGGGGTTGAGCTGCACATCCACACAACCTGGCTGGGTGGCATCT  
ERR117211.3135314.2+ CAAGGAACAGGAGCTGATGGGGTTGAGCTGCACATCCACACAACCTGGCTGGGTGGCATCT  
ERR117211.8033843.2- CAAGGAACAGGAGCTGATGGGGTTGAGCTGCACATCCACACAACCTGGCTGGGTGGCATCT  
ERR117212.13913207.2+ CAAGGAACAGGAGCTGATGGGGTTGAGCTGCACATCCACACAACCTGGCTGGGTGGCATCT  
ERR117213.24762755.1- CAAGGAACAGGAGCTGATGGGGTTGAGCTGCACATCCACACAACCTGGCTGGGTGGCATCT  
ERR117213.70641.1+ CACGGAACCGGCGTGATGGGGTTGAGCTGCACATCCACACAACCTGGCTGGGTGGCATCT  
ERR117214.11189135.1- CAAGGAACAGGAGCTGATGGGGTTGAGCTGCACATCCACACAACCTGGCTGGGTGGCATCT  
ERR117214.5815958.1+ CAAGGAACAGGAGCTGATGGGGTTGAGCTGCACATCCACACAACCTGGCTGGGTGGCATCT  
ERR117161.23788703.1+ GGAACAGGAGCTGATGGGGTTGAGCTGCACATCCACACAACCTGGCTGGGTGGCATCT  
ERR117167.14056574.1- GGAACAGGAGCTGATGGGGTTGAGCTGCACATCCACACAACCTGGCTGGGTGGCATCT  
ERR117171.15015481.2+ GAACAGGAGCTGATGGGGTTGAGCTGCACATCCACACAACCTGGCTGGGTGGCATCT  
ERR117200.20534766.1- GAACAGGAGCTGATGGGGTTGAGCTGCACATCCACACAACCTGGCTGGGTGGCATCT  
ERR117200.20534879.1- GAACAGGAGCTGATGGGGTTGAGCTGCACATCCACACAACCTGGCTGGGTGGCATCT  
ERR117211.11264989.1+ GAACAGGAGCTGATGGGGTTGAGCTGCACATCCACACAACCTGGCTGGGTGGCATCT  
ERR117153.16400562.2+ ACAGGAGCTGATGGGGTTGAGCTGCACATCCACACAACCTGGCTGGGTGGCATCT  
ERR117153.22012558.2+ ACAGGAGCTGATGGGGTTGAGCTGCACATCCACACAACCTGGCTGGGTGGCATCT  
ERR117154.25543571.2+ ACAGGAGCTGATGGGGTTGAGCTGCACATCCACACAACCTGGCTGGGTGGCATCT  
ERR117168.3687101.1+ ACAGGAGCTGATGGGGTTGAGCTGCACATCCACACAACCTGGCTGGGTGGCATCT  
ERR117187.4682199.1+ ACAGGAGCTGATGGGGTTGAGCTGCACATCCACACAACCTGGCTGGGTGGCATCT  
ERR117190.36997267.1+ ACAGGAGCTGATGGGGTTGAGCTGCACATCCACACAACCTGGCTGGGTGGCATCT  
ERR117153.27720594.2+ CAGGAGCTGATGGGGTTGAGCTGCACATCCACACAACCTGGCTGGGTGGCATCT  
ERR117153.45094634.2+ CAGGAGCTGATGGGGTTGAGCTGCACATCCACACAACCTGGCTGGGTGGCATCT  
ERR117154.16009785.2+ CAGGAGCTGATGGGGTTGAGCTGCACATCCACACAACCTGGCTGGGTGGCATCT  
ERR117154.46529470.2+ CAGGAGCTGATGGGGTTGAGCTGCACATCCACACAACCTGGCTGGGTGGCATCT  
ERR117154.522286.2+ CAGGAGCTGATGGGGTTGAGCTGCACATCCACACAACCTGGCTGGGTGGCATCT  
ERR117155.24331140.2+ CAGGAGCTGATGGGGTTGAGCTGCACATCCACACAACCTGGCTGGGTGGCATCT  
ERR117155.46378739.2+ AGGAGCTGATGGGGTTGAGCTGCACATCCACACAACCTGGCTGGGTGGCATCT  
ERR117190.11895861.1+ AGGAGCTGATGGGGTTGAGCTGCACATCCACACAACCTGGCTGGGTGGCATCT  
ERR117190.30731870.1+ AGGAGCTGATGGGGTTGAGCTGCACATCCACACAACCTGGCTGGGTGGCATCT  
ERR117197.400966.1- AGGAGCTGATGGGGTTGAGCTGCACATCCACACAACCTGGCTGGGTGGCATCT  
ERR117199.3208434.1+ GAGCTGATGGGGTTGAGCTGCACATCCACACAACCTGGCTGGGTGGCATCT  
ERR117170.5195913.1+ GCTGATGGGGTTGAGCTGCACATCCACACAACCTGGCTGGGTGGCATCT  
ERR117167.17752603.1+ CTGATGGGGTTGAGCTGCACATCCACACAACCTGGCTGGGTGGCATCT  
ERR117188.13021263.1+ CTGATGGGGTTGAGCTGCACATCCACACAACCTGGCTGGGTGGCATCT  
ERR117202.1843529.1- TGATGGGGTTGAGCTGCACATCCACACAACCTGGCTGGGTGGCATCT  
ERR117167.7857224.1- TGATGGGGTTGAGCTGCACATCCACACAACCTGGCTGGGTGGCATCT  
ERR117185.11043877.1+ GATGGGGTTGAGCTGCACATCCACACAACCTGGCTGGGTGGCATCT  
ERR117190.45442737.1+ ATGGGGTTGAGCTGCACATCCACACAACCTGGCTGGGTGGCATCT  
ERR117155.44519310.2+ ATGGGGTTGAGCTGCACATCCACACAACCTGGCTGGGTGGCATCT  
ERR117211.6459571.2+ TGGGGTTGAGCTGCACATCCACACAACCTGGCTGGGTGGCATCT  
ERR117158.10800048.1+ TGGGGTTGAGCTGCACATCCACACAACCTGGCTGGGTGGCATCT  
ERR117202.276018.2- TGGGGTTGAGCTGCACATCCACACAACCTGGCTGGGTGGCATCT  
ERR117186.18226816.1- GGGTTGAGCTGCACATCCACACAACCTGGCTGGGTGGCATCT  
ERR117210.15005312.2+ GGGTTGAGCTGCACATCCACACAACCTGGCTGGGTGGCATCT  
ERR117210.16500830.2+ GGGTTGAGCTGCACATCCACACAACCTGGCTGGGTGGCATCT  
ERR117210.16854114.2+ GGGTTGAGCTGCACATCCACACAACCTGGCTGGGTGGCATCT  
ERR117210.21340502.2+ GGGTTGAGCTGCACATCCACACAACCTGGCTGGGTGGCATCT  
ERR117210.4356481.2+ GGGTTGAGCTGCACATCCACACAACCTGGCTGGGTGGCATCT  
ERR117210.6082569.2+ GGGTTGAGCTGCACATCCACACAACCTGGCTGGGTGGCATCT  
ERR117214.12669516.2+ GGTTGAGCTGCACATCCACACAACCTGGCTGGGTGGCATCT  
ERR117189.21830335.2- TTGAGCTGCACATCCACACAACCTGGCTGGGTGGCATCT  
ERR117200.11764044.1- TTGAGCTGCACATCCACACAACCTGGCTGGGTGGCATCT  
ERR117172.844435.1- GAGCTGCACATCCACACAACCTGGCTGGGTGGCATCT  
ERR117190.3171531.1- AGCTGCACATCCACACAACCTGGCTGGGTGGCATCT  
ERR117170.8626134.1+ GCTGCACATCCACACAACCTGGCTGGGTGGCATCT  
ERR117213.25383985.2+ GCTGCACATCCACACAACCTGGCTGGGTGGCATCT

|                       |                                  |
|-----------------------|----------------------------------|
| ERR117187.1846104.2-  | TGCACATCCACACAGCTGGCTGGGTGGCATCT |
| ERR117169.17408627.1- | GCACATCCCCACAACCTGGCTGGGTGGCATCT |
| ERR117173.10552519.1- | GCACACCCACACAGCTGGCGGGTGGCATCT   |
| ERR117173.20651546.1+ | CACATCCACACAACCTGGCTGGGTGGCATCT  |
| ERR117184.7371422.1+  | CACATCCACACAACCTGGCTGGGTGGCATCT  |
| ERR117185.11325256.2+ | CACATCCACACAACCTGGCTGGGTGGCATCT  |
| ERR117160.24336321.1- | ACATCCACACAGCTGGCTGGGTGGCATCT    |
| ERR117171.23237058.2+ | CATCCACACAACCTGGCTGGGTGGCATCT    |
| ERR117187.1165299.1-  | CACACAACCTGGCTGGGTGGCATCT        |
| ERR117167.16748331.1- | ACACAACCTGGCTGGGTGGCATCT         |
| ERR117185.23115514.1- | ACACAACCTGGCTGGGTGGCATCT         |
| ERR117168.721185.1-   | CAACTGGGTGGGTGGCAGCT             |
| ERR117170.14720665.1+ | ACTGGCTGGGTGGCATCT               |
| ERR117195.19851398.2- | ACTGCCTGGGTGGCATCT               |
| ERR117161.1948449.1+  | CTGGCTGGGTGGCATCT                |
| ERR117159.702483.1-   | TGGCTGGGTGGCATCT                 |
| ERR117160.22579884.1- | GGGCTGGGTGGCATCT                 |
| ERR117187.16354200.1- | TGGCTGGGTGGCATCT                 |
| ERR117158.17464169.2+ | GGCTGGGTGGCATCT                  |
| ERR117173.13365762.2- | GGCGGGTGGCATCT                   |
| ERR117185.21262523.2- | GGCGGGTGGCATCT                   |
| ERR117185.5549859.2-  | GGCTGGGTGGCATCT                  |
| ERR117203.2780230.2-  | GCCTGGGTGGCATCT                  |
| ERR117212.9510103.1-  | GGCTGGGTGGCATCT                  |
| ERR117190.28070050.2- | GCTGGGTGGCATCT                   |
| ERR117209.2234770.1-  | CGGGTGGCATCT                     |
| ERR117184.14949727.1+ | GTGGCATCT                        |
| ERR117212.18402684.1- | GTGGCATCT                        |
| ERR117191.2740877.1-  | TGGCATCT                         |
| ERR117167.8827916.1-  | GGCATCT                          |
| ERR117186.8377888.2-  | GGCATCT                          |
| ERR117172.11772034.2- | GCATCA                           |
| ERR117195.20783572.2- | TCT                              |
| ERR117211.13982774.2- | TCT                              |
| ERR117190.16447003.1- | CT                               |
| ERR117200.4919005.1-  | CG                               |
| ERR117210.15005312.1- | CT                               |
| ERR117210.16500830.1- | CG                               |
| ERR117210.21340502.1- | CG                               |
| ERR117210.4356481.1-  | CT                               |
| ERR117210.6082569.1-  | CT                               |
| ERR117212.13913207.1- | CT                               |
| ERR117190.8741966.1+  | T                                |

consensus

CAAGGAACAGGAGCTGATGGGGTTGAGCTGCACATCCACACAACCTGGCTGGGTGGCATCT

|                       |                             |
|-----------------------|-----------------------------|
| ERR117190.29798443.1- | GGA                         |
| ERR117188.12796779.1+ | GGATT                       |
| ERR117159.22106723.1+ | GGATTCAGCCCTCC              |
| ERR117161.21646014.1- | GGATTCAGCCCTCAT             |
| ERR117162.7505659.1-  | GGATTCAGCCCTCAT             |
| ERR117186.7854080.1-  | GGATTCAGCCCTCATG            |
| ERR117208.1138650.2-  | GGATTCAGCCCTCATG            |
| ERR117195.16895887.2- | GGATTCAGCCCTCATGG           |
| ERR117195.20988009.2- | GGATTCAGCCCTCATGG           |
| ERR117153.23642243.1+ | GGATTCAGCCCTCATGGA          |
| ERR117153.55281904.1+ | GGATTCAGCCCTCATGGA          |
| ERR117154.19671490.1+ | GGATTCAGCCCTCATGGA          |
| ERR117154.51411665.1+ | GGATTCAGCCCTCATGGA          |
| ERR117154.6725085.1+  | GGATTCAGCCCTCATGGA          |
| ERR117155.1262030.1+  | GGATTCAGCCCTCATGGA          |
| ERR117155.31097123.1+ | GGATTCAGCCCTCATGGA          |
| ERR117155.39985310.1+ | GGATTCAGCCCTCATGGA          |
| ERR117155.44201871.1+ | GGATTCAGCCCTCATGGA          |
| ERR117160.14580897.1+ | GGATTCAGCCCTCATGGA          |
| ERR117189.19822430.1+ | GGATTCAGACCTCCTGGA          |
| ERR117194.922317.2-   | GGATTCAGCCCTCATGGAGAGCT     |
| ERR117168.6995690.1-  | GGATTCAGCCCTCATGGAGAGCTG    |
| ERR117170.3438595.2+  | GGATTCAGCCCTCATGGAGAGCTG    |
| ERR117169.1769409.1+  | GGATTCAGCCCTCATGGAGAGCTGC   |
| ERR117153.16400562.2+ | GGATTCAGCCCTCATGGAGAGCTGCC  |
| ERR117153.22012558.2+ | GGATTCAGCCCTCATGGAGAGCTGCC  |
| ERR117154.25543571.2+ | GGATTCAGCCCTCATGGAGAGCTGCC  |
| ERR117172.25891693.1+ | GGATTCAGCCCTCATGGAGAGCTGCC  |
| ERR117189.15711126.2- | GGATTCAGCCCTCATGGAGAGCTGCC  |
| ERR117213.70641.1+    | GGATTCAGCCCTCATGGAGAGCTGCC  |
| ERR117153.27720594.2+ | GGATTCAGCCCTCATGGAGAGCTGCCT |
| ERR117153.45094634.2+ | GGATTCAGCCCTCATGGAGAGCTGCCT |
| ERR117154.16009785.2+ | GGATTCAGCCCTCATGGAGAGCTGCCT |
| ERR117154.46529470.2+ | GGATTCAGCCCTCATGGAGAGCTGCCT |
| ERR117154.522286.2+   | GGATTCAGCCCTCATGGAGAGCTGCCT |
| ERR117155.24331140.2+ | GGATTCAGCCCTCATGGAGAGCTGCCT |
| ERR117155.46378739.2+ | GGATTCAGCCCTCATGGAGAGCTGCCT |

ERR117209.2148070.1+ GGATTCAGCCCTCATGGAGAGCTGCCTGGG  
ERR117168.9275607.1+ GGATTCAGCCCTCATGGAGAGCTGCCTGGGT  
ERR117172.21418257.2- GGATTCAGCCCTCATGGAGAGCTGCCTGGGT  
ERR117211.3135314.2+ GGATTCAGCCCTCATGGAGAGCGCCTGGGG  
ERR117159.18195311.1+ GGATTCAGCCCTCACGGAGAGCTGCCTGGGGC  
ERR117160.14706551.1- GGATTCAGCCCTCATGGAGAGCTGCCTGGGTCT  
ERR117191.1712169.1- GGATTCAGCCCTCATGGAGAGCTGCCTGGGTCT  
ERR117196.3093370.1+ GGATTCAGCCCTCATGGAGAGCTGCCTGGGTCT  
ERR117200.106648.1+ GGATTCAGCCCTCATGGAGAGCTGCCTGGGTCT  
ERR117155.44519310.2+ GGATTCAGCCCTCATGGAGAGCTGCCTGGGTCTGAC  
ERR117171.7573199.1+ GGATTCAGCCCTCATGGAGAGCTGCCTGGGGCTGACG  
ERR117192.4993405.1+ GGATTCAGCCCTCATGGAGAGCTGCCTGGGTCTGACA  
ERR117197.6040782.1+ GGATTCAGCCCTCATGGAGAGCTGCCTGGGTCTGACAT  
ERR117171.11301750.1- GGATTCAGCCCTCATGGAGAGCTGCCTGGGTCTGACGTT  
ERR117160.876206.1- GGATTCAGCCCTCATGGAGAGCTGCCTGGGTCTGACGTTG  
ERR117212.13913207.2+ GGATTCAGCCCTCACGGAGAGCTGCCTGGGGCCGACATTG  
ERR117185.1830563.1+ GGATTCAGCCCTCATGGAGAGCTGCCTGGGTCTGACGTTGTGAC  
ERR117197.421777.1- GGATTCAGCCCTCATGGAGAGCTGCCTGGGTCTGACATTGTGAC  
ERR117187.4682199.1+ GGATTCAGCCCTCATGGAGAGCTGCCTGGGTCTGACATTGTGACAA  
ERR117190.36997267.1+ GGATTCAGCCCTCATGGAGAGCTGCCTGGGTCTGACATTGTGACAA  
ERR117190.11895861.1+ GGATTCAGCCCTCATGGAGAGCTGCCTGGGTCTGACATTGTGACAAGA  
ERR117190.30731870.1+ GGATTCAGCCCTCATGGAGAGCTGCCTGGGTCTGACATTGTGACAAGA  
ERR117159.10361209.1+ GGATTCAGCCCTCATGGAGAGCTGCCTGGGTCTGACATTGTGACAAGAG  
ERR117161.10441001.1+ GGATTCAGCCCTCATGGAGAGCTGCCTGGGTCTGACATTGTGACAAGAG  
ERR117205.20017840.1+ GGATTCAGCCCTCATGGAGAGCTGCCTGGGTCTGACATTGTGACAAGAG  
ERR117205.3454310.1+ GGATTCAGCCCTCATGGAGAGCTGCCTGGGTCTGACATTGTGACCAGAG  
ERR117171.15015481.2+ GGATTCAGCCCTCATGGAGAGCTGCCTGGGTCTGACGTTGTGACAAGAGG  
ERR117213.24762755.1- GGATTCAGCCCTCATGGAGAGCTGCCTGGGTCTGACATTGTGACAAGAGGT  
ERR117158.4821344.1+ GGATTCAGCCCTCATGGAGAGCTGCCCGGGTGTGACATTGTGACAAAAGGTG  
ERR117161.23788703.1+ GGATTCAGCCCTCATGGAGAGCTGCCTGGGTCTGACATTGTGACAAGAGGTG  
ERR117167.14056574.1- GGATTCAGCCCTCATGGAGAGCTGCCTGGGTCTGACATTGTGACAAGAGGTG  
ERR117188.13021263.1+ GGATTCAGCCCTCATGGAGAGCTGCCTGGGTCTGACATTGTGACAAGAGGTG  
ERR117211.8033843.2- GGATTCAGCCCTCATGGAGAGCTGCCTGGGTCTGACATTGTGACAAGAGGTGCC  
ERR117168.3687101.1+ GGATTCAGCCCTCATGGAGAGCTGCCTGGGTCTGACATTGTGACAAGAGGTGCC  
ERR117190.45442737.1+ GGATTCAGCCCTCATGGAGAGCTGCCTGGGTCTGACGTTGTGACAAGAGGTGCC  
ERR117170.5195913.1+ GGATTCAGCCCTCATGGAGAGCTGCCTGGGTCTGACATTGTGACAAGAGGGCCCTTCCA  
ERR117158.10800048.1+ GGATTCAGCCCTCATGGAGAGCTGCCTGGGTCTGACATTGTGACAAGAGGTGCCCTTCCA  
ERR117158.14364574.1- GGATTCAGCCCTCATGGAGAGCTGCCTGGGTCTGACATTGTGACAAGAGGTGCCCTTCCA  
ERR117158.17464169.2+ GGATTCAGCCCTCATGGAGAGCTGCCTGGGTCTGACATTGTGACAAGAGGTGCCCTTCCA  
ERR117159.702483.1- GGATTCAGCCCTCATGGAGAGCTGCCTGGGTCTGACATTGTGACAAGAGGTGCCCTTCCA  
ERR117160.22579884.1- GGATTCAGCCCTCATGGAGAGCTGCCTGGGTCTGACGTTGTGACAAGAGGTGCCCTTCCA  
ERR117160.24336321.1- GGATTCAGCCCTCATGGAGAGCTGCCTGGGTCTGACATTGTGACAAGAGGTGCCCTTCCA  
ERR117161.1948449.1+ GGATTCAGCCCTCATGGAGAGCTGCCTGGGTCTGACGTTGTGACAAGAGGTGCCCTTCCA  
ERR117167.16748331.1- GGATTCAGCCCTCATGGAGAGCTGCCTGGGTCTGACGTTGTGACAAGAGGTGCCCTTCCA  
ERR117167.17752603.1+ GGATTCAGCCCTCATGGAGAGCTGCCTGGGTCTGACATTGTGACAAGAGGTGCCCTTCCA  
ERR117167.7857224.1- GGATTCAGCCCTCATGGAGAGCTGCCTGGGTCTGACGTTGTGACAAGAGGTGCCCTTCCA  
ERR117167.8827916.1- GGATTCAGCCCTCAGGGAGAGCTGCCTGGGTCTGACGTTGTGACAAGAGGTGCCCTTCCA  
ERR117168.721185.1- GGATTCAGCCCTCATGGAGAGCTGCCTGGGTCTGACGTTGTGACAAGAGGTGCCCTTCCA  
ERR117169.17408627.1- GGATTCAGCCCTCATGGAGAGCTGCCTGGGTCTGACGTTGTGACAAGAGGTGCCCTTCCA  
ERR117170.14720665.1+ GGATTCAGCCCTCATGGAGAGCTGCCTGGGGCTGACGTTGTGACCAGAGGTGCCCTTCCA  
ERR117170.8626134.1+ GGATTCAGCCCTCATGGAGAGCTGCCTGGGTCTGACATTGTGACAAGAGGTGCCCTTCCA  
ERR117171.23237058.2+ GGATTCAGCCCTCATGGAGAGCTGCCTGGGTCTGACGTTGTGACAAGAGGTGCCCTTCCA  
ERR117172.11772034.2- GGATTCAGCCCGCAGGGAGAGCTGCCTGGGTCTGACATTGTGACGAGAGGGCCCTTCCA  
ERR117172.844435.1- GGATTCAGCCCTCATGGAGAGCTGCCTGGGTCTGACATTGTGACAAGAGGTGCCCTTCCA  
ERR117173.10552519.1- GGATTCAGCCCTCATGGAGAGCTGCCTGGGTCTGACATTGTGACAAGAGGTGCCCTTCCA  
ERR117173.13365762.2- GGATTCAGCCCTCATGGAGAGCTGCCTGGGTCTGACATTGTGACAAGAGGTGCCCTTCCA  
ERR117173.20651546.1+ GGATTCAGCCCTCATGGAGAGCTGCCTGGGTCTGACGTTGTGACAAGAGGTGCCCTTCCA  
ERR117184.14949727.1+ GGATTCAGCCCTCATGGAGAGCTGCCTGGGTCTGACATTGTGACAAGAGGTGCCCTTCCA  
ERR117184.7371422.1+ GGATTCAGCCCTCATGGAGAGGGCCTGGGTCTGACGTTGTGACAAGAGGTGCCCTTCCA  
ERR117185.10160607.2+ GGATTCAGCCCTCATGGAGAGCTGCCTGGGTCTGACGTTGTGACAAGAGGTGCCCTTCCA  
ERR117185.11043877.1+ GGATTCAGCCCTCATGGAGAGCTGCCTGGGTCTGACATTGTGACAAGAGGTGCCCTTCCA  
ERR117185.11325256.2+ GGATTCAGCCCTCATGGAGAGCTGCCTGGGTCTGACATTGTGACAAGAGGTGCCCTTCCA  
ERR117185.21262523.2- GGATTCAGCCCTCATGGAGAGCTGCCTGGGTCTGACATTGTGACAAGAGGTGCCCTTCCA  
ERR117185.23115514.1- GGATTCAGCCCTCATGGAGAGCTGCCTGGGTCTGACGTTGTGACAAGAGGTGCCCTTCCA  
ERR117185.23254860.1+ GGATTCAGCCCTCATGGAGAGCTGCCTGGGTCTGACGTTGTGACAAGAGGTGCCCTTCCA  
ERR117185.5549859.2- GGATTCAGCCCTCATGGAGAGCTGCCTGGGTCTGACATTGTGACAAGAGGTGCCCTTCCA  
ERR117186.18226816.1- GGATTCAGCCCTCATGGAGAGCTGCCTGGGTCTGACATTGTGACAAGAGGTGCCCTTCCA  
ERR117186.8377888.2- GGATTCAGCCCTCATGGAGAGCTGCCTGGGTCTGACATTGTGACAAGAGGTGCCCTTCCA  
ERR117187.1165299.1- GGATTCAGCCCTCATGGAGAGCTGCCTGGGTCTGACATTGTGACAAGAGGTGCCCTTCCA  
ERR117187.16354200.1- GGATTCAGCCCTCATGGAGAGCTGCCTGGGTCTGACGTTGTGACAAGAGGTGCCCTTCCA  
ERR117187.1846104.2- GGATTCAGCCCTCATGGAGAGCTGCCTGGGTCTGACATTGTGACAAGAGGTGCCCTTCCA  
ERR117189.21830335.2- GGATTCAGCCCTCATGGAGAGCTGCCTGGGTCTGACGTTGTGACAAGAGGTGCCCTTCCA  
ERR117190.16447003.1- GGATTCAGCCCTCATGGAGAGCTGCCTGGGTCTGACATTGTGACAAGAGGTGCCCTTCCA  
ERR117190.28070050.2- GGATTCAGCCCTCATGGAGAGCTGCCTGGGTCTGACGTTGTGACAAGAGGTGCCCTTCCA  
ERR117190.3171531.1- GGATTCAGCCCTCATGGAGAGCTGCCTGGGTCTGACATTGTGACAAGAGGTGCCCTTCCA  
ERR117190.8741966.1+ GGATTCAGCCCTCATGGAGAGCTGCCTGGGTCTGACGTTGTGACAAGAGGTGCCCTTCCA  
ERR117191.2740877.1- GGATTCAGCCCTCATGGAGAGCTGCCTGGGTCTGACATTGTGACAAGAGGTGCCCTTCCA  
ERR117191.5032878.1- GGATTCAGCCCTCATGGAGAGCTGCCTGGGTCTGACATTGTGACAAGAGGTGCCCTTCCA  
ERR117191.5032878.2+ GGATTCAGCCCTCATGGAGAGCTGCCTGGGTCTGACATTGTGACAAGAGGTGCCCTTCCA  
ERR117193.4247774.2- GGATTCAGCCCTCATGGAGAGCTGCCTGGGTCTGACATTGTGACAAGAGGGCCCTTCCA  
ERR117193.5201767.1- GGATTCAGCCCTCATGGAGAGCTGCCTGGGTCTGACATTGTGACAAGAGGTGCCCTTCCA  
ERR117195.17135423.1- GGATTCAGCCCTCATGGAGAGCTGCCTGGGTCTGACATTGTGACAAGAGGTGCCCTTCCA  
ERR117195.19851398.2- GGATTCAGCCCTCATGGAGAGCTGCCTGGGTCTGACATTGTGACAAGAGGTGCCCTTCCA  
ERR117195.20783572.2- GGATTCGTCCTGATGGAGAGCTGCCTGGGTCCGACAGTGTGACAAGAGGTGCCCTTCCA



ERR117195.7556643.1- GGATTCAGCCCTCATGGAGAGCTGCCTGGGTCTGACATTGTGACAAGAGGTGCCTTCCAA  
ERR117197.400966.1- GGATTCAGCCCTCATGGAGAGCTGCCTGGGTCTGACATTGTGACAAGAGGTGCCTTCCAA  
ERR117199.3208434.1+ GGATTCAGCCCTCATGGAGAGCTGCCTGGGTCTGACATTGTGACAAGAGGTGCCTTCCAA  
ERR117199.6229760.2+ GGATTCAGCCCTCATGGAGAGCTGCCTGGGTCTGACATTGTGACAAGAGGTGCCTTCCAC  
ERR117200.11764044.1- GGATTCAGCCCTCATGGAGAGCTGCCTGGGTCTGACATTGTGACAAGAGGTGCCTTCCAA  
ERR117200.20534766.1- GGATTCAGCCCTCATGGAGAGCTGCCTGGGTCTGACATTGTGACAAGAGGTGCCTTCCAA  
ERR117200.20534879.1- GGATTCAGCCCTCATGGAGAGCTGCCTGGGTCTGACATTGTGACAAGAGGTGCCTTCCAA  
ERR117200.4919005.1- GGAGTCAGCCCTCATGGAGAGCTGCCTGGGTCTGACATTGTGACAAGAGGTGCCTTCCAA  
ERR117202.1843529.1- GGATTCAGCCCTCATGGAGAGCTGCCTGGGTCTGACATTGTGACAAGAGGTGCCTTCCAA  
ERR117202.276018.2- GGATTCAGCCCTCATGGAGAGCTGCCTGGGTCTGACATTGTGACAAGAGGTGCCTTCCAA  
ERR117203.2780230.2- GGATTCAGCCCTCATGGAGAGCTGCCTGGGTCTGACATTGTGACAAGAGGTGCCTTCCAA  
ERR117209.2234770.1- GGATTCAGCGCGCATGGAGAGCTGCCTGGGTCTGACATTGTGACAAGAGGTGCCTTCCAA  
ERR117210.12667077.1+ GGATTCAGCCCTCATGGAGAGCTGCCTGGGTCTGACATTGTGACAAGAGGTGCCTTCCAA  
ERR117210.15005312.1- GGATTCAGCCCTCATGGAGAGCTGCCTGGGTCTGACATTGTGACAAGAGGTGCCTTCCAA  
ERR117210.15005312.2+ GGATTCAGCCCTCATGGAGAGCTGCCTGGGTCTGACATTGTGACAAGAGGTGCCTTCCAA  
ERR117210.15363689.1+ GGATTCAGCCCTCATGGAGAGCTGCCTGGGTCTGACATTGTGACAAGAGGTGCCTTCCAA  
ERR117210.16500830.1- GGACTCAGCCCTCATGGAGAGCTGCCTGGGTCTGACATTGTGACAAGAGGTGCCTTCCAA  
ERR117210.16500830.2+ GGATTCAGCCCTCATGGAGAGCTGCCTGGGTCTGACATTGTGACAAGAGGTGCCTTCCAA  
ERR117210.16854114.2+ GGATTCAGCCCTCATGGAGAGCTGCCTGGGTCTGACATTGTGACAAGAGGTGCCTTCCAA  
ERR117210.19301345.1+ GGATTCAGCCCTCATGGAGAGCTGCCTGGGTCTGACATTGTGACAAGAGGTGCCTTCCAA  
ERR117210.2000732.1+ GGATTCAGCCCTCATGGAGAGCTGCCTGGGTCTGACATTGTGACAAGAGGTGCCTTCCAA  
ERR117210.20471729.1+ GGATTCAGCCCTCATGGAGAGCTGCCTGGGTCTGACATTGTGACAAGAGGTGCCTTCCAA  
ERR117210.21340502.1- GGATTCAGCCCTCATGGAGAGCTGCCTGGGTCTGACATTGTGACAAGAGGTGCCTTCCAA  
ERR117210.21340502.2+ GGATTCAGCCCTCATGGAGAGCTGCCTGGGTCTGACATTGTGACAAGAGGTGCCTTCCAA  
ERR117210.21361233.1+ GGATTCAGCCCTCATGGAGAGCTGCCTGGGTCTGACATTGTGACAAGAGGTGCCTTCCAA  
ERR117210.4356481.1- GGATTCAGCCCTCATGGAGAGCTGCCTGGGTCTGACATTGTGACAAGAGGTGCCTTCCAA  
ERR117210.4356481.2+ GGATTCAGCCCTCATGGAGAGCTGCCTGGGTCTGACATTGTGACAAGAGGTGCCTTCCAA  
ERR117210.6082569.1- GGATTCAGCCCTCATGGAGAGCTGCCTGGGTCTGACATTGTGACAAGAGGTGCCTTCCAA  
ERR117210.6082569.2+ GGATTCAGCCCTCATGGAGAGCTGCCTGGGTCTGACATTGTGACAAGAGGTGCCTTCCAA  
ERR117211.11264989.1+ GGATTCAGCCCTCATGGAGAGCTGCCTGGGTCTGACATTGTGACAAGAGGTGCCTTCCAA  
ERR117211.13982774.2- GGATTCAGCCCTCATGGAGAGCTGCCTGGGTCTGACATTGTGACAAGAGGTGCCTTCCAA  
ERR117211.6459571.2+ GGATTCAGCCCTCATGGAGAGCTGCCTGGGTCTGACATTGTGACAAGAGGTGCCTTCCAA  
ERR117212.13913207.1- GGATTCAGCCCTCATGGAGAGCTGCCTGGGTCTGACATTGTGACAAGAGGTGCCTTCCAA  
ERR117212.18402684.1- GGATTCAGCCCTCATGGAGAGCTGCCTGGGTCTGACATTGTGACAAGAGGTGCCTTCCAA  
ERR117212.9510103.1- GGATTCAGCCCTCATGGAGAGCTGCCTGGGTCTGACATTGTGACAAGAGGTGCCTTCCAA  
ERR117213.25383985.2+ GGATTCAGCCCTCATGGAGAGCTGCCTGGGTCTGACATTGTGACAAGAGGTGCCTTCCAA  
ERR117214.11189135.1- GGATTCAGCCCTCATGGAGAGCTGCCTGGGTCTGACATTGTGACAAGAGGTGCCTTCCAA  
ERR117214.12669516.2+ GGATTCAGCCCTCATGGAGAGCTGCCTGGGTCTGACATTGGGACAAGAGGTGCCTTCCAA  
ERR117214.5815958.1+ GGATTCAGCCCTCATGGAGAGCTGCCTGGGTCTGACATTGTGACAAGAGGTGCCTTCCAA  
ERR117173.20977760.1+ GATTCAGCCCTCATGGAGAGCTGCCTGGGTCTGACATTGTGACAAGAGGTGCCTTCCAA  
ERR117195.13241995.1- GATTCAGCCCTCATGGAGAGCTGCCTGGGTCTGACATTGTGACAAGAGGTGCCTTCCAA  
ERR117195.14059793.1- GATTCAGCCCTCATGGAGAGCTGCCTGGGTCTGACATTGTGACAAGAGGTGCCTTCCAA  
ERR117195.19875258.1- GATTCAGCCCTCATGGAGAGCTGCCTGGGTCTGACATTGTGACAAGAGGTGCCTTCCAA  
ERR117195.6845458.1- GATTCAGCCCTCATGGAGAGCTGCCTGGGTCTGACATTGTGACAAGAGGTGCCTTCCAA  
ERR117203.3734878.2- ATTCAGCCCTCATGTAGGGCTGCCGGGTCTGACATTGTGACAAGAGGTGCCTTCCAA  
ERR117211.7038507.2- ATTCAGCCCTCATGGAGAGCTGCCTGGGTCTGACATTGTGACAAGAGGTGCCTTCCAA  
ERR117184.20758333.1+ TCAGCCCTCATGGAGAGCTGCCTGGGTCTGACATTGTGACAAGAGGTGCCTTCCAA  
ERR117186.6680280.2- TCAGCCCTCATGGAGAGCTGCCTGGGTCTGACATTGTGACAAGAGGTGCCTTCCAA  
ERR117172.22363800.1- AGCCCTCATGGAGAGCTGCCTGGGTCTGACATTGTGACAAGAGGTGCCTTCCAA  
ERR117211.6530188.1- AGCCCTCATGGAGAGCTGCCTGGGTCTGACATTGTGACAAGAGGTGCCTTCCAA  
ERR117160.10839667.1+ GCCCTCATGGAGAGCTGCCTGGGTCTGACATTGTGACAAGAGGTGCCTTCCAA  
ERR117193.4162248.2- GCCCTCATGGAGAGCTGCCTGGGTCTGACATTGTGACAAGAGGTGCCTTCCAA  
ERR117184.1045359.1+ CCCTCATGGAGAGCTGCCTGGGTCTGACATTGTGACAAGAGGTGCCTTCCAA  
ERR117205.11725674.1+ CCCTCATGGAGAGCTGCCTGGGTCTGACATTGTGACAAGAGGTGCCTTCCAA  
ERR117205.12765034.1+ CCCTCATGGAGAGCTGCCTGGGTCTGACATTGTGACAAGAGGTGCCTTCCAA  
ERR117205.18084573.1+ CCCTCATGGAGAGCTGCCTGGGTCTGACATTGTGACAAGAGGTGCCTTCCAA  
ERR117205.20836240.1+ CCCTCATGGAGAGCTGCCTGGGTCTGACATTGTGACAAGAGGTGCCTTCCAA  
ERR117173.10498732.1- CATGGAGAGCTGCCTGGGTCTGACGTTGTGACAAGAGGTGCCTTCCAA  
ERR117185.25418354.1- CATGGAGAGCTGCCTGGGTCTGACGTTGTGACAAGAGGTGCCTTCCAA  
ERR117214.17076092.1+ CATGGAGAGCTGCCTGGGTCTGACATTGTGACAAGAGGTGCCTTCCAA  
ERR117195.5194609.2- AGGGAGAGCGGCGGTGTCTGACATTGTGACAAGAGGTGCCTTCCAA  
ERR117206.2892479.2+ TGGAGAGCTGCCTGGGTCTGACATTGTGACAAGAGGTGCCTTCCAA  
ERR117202.4492296.1+ GGAGAGCTGCCTGGGTCTGACATTGTGACAAGAGGTGCCTTCCAA  
ERR117212.16686714.1- GAGAGCGGCTGGGTCTGACATTGTGACAAGAGGTGCCTTCCAA  
ERR117162.29184588.1- AGGGCTGCCTGGGTCTGACGTTGTGACAAGAGGTGCCTTCCAA  
ERR117191.3942459.2- AGAGCTGCCTGGGTCTGACATTGTGACGAGAGGTGCCTTCCAA  
ERR117171.22484358.1- GGGCTGCCTGGGTCTGACGTTGTGACAAGAGGTGCCTTCCAA  
ERR117185.18468589.1- GAGCTGCCTGGGTCTGACATTGTGACAAGAGGTGCCTTCCAA  
ERR117185.19578803.1- GAGCTGCCTGGGTCTGACATTGTGACAAGAGGTGCCTTCCAA  
ERR117158.9230335.1- AGCGGCTGGGTCTGACATTGTGACAAGAGGTGCCTTCCAA  
ERR117159.12488008.1+ AGTGCCTGGGTCTGACGTTGTGACAAGAGGTGCCTTCCAA  
ERR117210.16854114.1- CCGGCGGGGTCTGACATTGTGACAAGAGGTGCCTTCCAA  
ERR117186.18182009.1- CTGCGGGGTCTGACGTTGTGACAAGAGGTGCCTTCCAA  
ERR117189.21787522.1- TGCCGGGTCTGACATTGTGACAAGAGGTGCCTTCCAA  
ERR117167.20252206.1+ CCTGGGTCTGACATTGTGACAAGAGGTGCCTTCCAA  
ERR117170.18019832.1- CTGGGTCTGACATTGTGACAAGAGGTGCCTTCCAA  
ERR117158.17464169.1- TGGGTCTGACATTGTGACAAGAGGTGCCTTCCAA  
ERR117169.15062876.1- GGGTCTGACATTGTGACAAGAGGTGCCTTCCAA  
ERR117173.386521.1- GTCTGACATTGTGACAAGAGGTGCCTTCCAA  
ERR117158.11622681.1- CTGACATTGTGACAAGAGGTGCCTTCCAA  
ERR117195.24277877.1+ CTGACATTGTGACAAGAGGTGCCTTCCAA  
ERR117195.25470877.1+ CTGACATTGTGACAAGAGGTGCCTTCCAA  
ERR117195.25471015.1+ CTGACATTGTGACAAGAGGTGCCTTCCAA  
ERR117170.18440732.2- GACGTGGTGAGAAGAGGTGCCTTCCAA



ERR117190.8741966.1+ AAGGCAGCATCTGTTCTCTgtaaggtgaaca  
ERR117173.13365762.2- AAGGCAGCATCTGTTCTCTgtaagttgaacag  
ERR117185.21262523.2- AAGGCAGCATCTGTTCTCTgtaagttgaacag  
ERR117185.5549859.2- AAGGCAGCATCTGTTCTCTgtaagttgaacag  
ERR117193.4162248.2- AAGGCAGCATCTGTTCTCTgtaagttgaacag  
ERR117190.16447003.1- AAGGCAGCATCTGTTCTCTgtaagttgaacaggtt  
ERR117197.400966.1- AAGGCAGCATCTGTTCTCTgtaagttgaacaggtt  
ERR117199.3208434.1+ AAGGCAGCATCTGTTCTCTgtaagttgaacaggtt  
ERR117210.15005312.2+ AAGGCAGCATCTGTTCTCTgtaagttgaacaggtt  
ERR117210.16500830.2+ AAGGCAGCATCTGTTCTCTgtaagttgaacaggtt  
ERR117210.16854114.2+ AAGGCAGCATCTGTTCTCTgtaagttgaacaggtt  
ERR117210.21340502.2+ AAGGCAGCATCTGTTCTCTgtaagttgaacaggtt  
ERR117210.4356481.2+ AAGGCAGCATCTGTTCTCTgtaagttgaacaggtt  
ERR117210.6082569.2+ AAGGCAGCATCTGTTCTCTgtaagttgaacaggtt  
ERR117202.276018.2- AAGGCAGCATCTGTTCTCTgtaagttgaacaggtt  
ERR117203.2780230.2- AAGGCAGCATCTGTTCTCTgtaagttgaacaggtt  
ERR117167.8827916.1- AAGGCAGCATCTGTTCTCTgtaagttgaacaggtt  
ERR117172.11772034.2- GAGGCAGCATCTGTTCTCTgtaagttgagcaggtt  
ERR117186.8377888.2- AAGGCAGCATCTGTTCTCTgtaagttgaacaggtt  
ERR117200.11764044.1- AAGGCAGCATCTGTTCTCTgtaagttgaacaggtt  
ERR117202.1843529.1- AAGGCAGCATCTGTTCTCTgtaagttgaacaggtt  
ERR117159.12488008.1+ AAGGCAGCATCTGTTCTCTgtaagttgaaaggtt  
ERR117185.23254860.1+ AAGGCAGCATCTGTTCTCTgtaagttgaacaggtt  
ERR117158.10800048.1+ AAGGCAGCATCTGTTCTCTgtaagttgaacaggtt  
ERR117185.10160607.2+ AAGGCAGCATCTGTTCTCTgtaagttgaacaggtt  
ERR117173.20977760.1+ AAGGCAGCATCTGTTCTCTgtaagttgaacaggtt  
ERR117186.6680280.2- AAGGCAGCATCTGTTCTCTgtaagttgaacaggtt  
ERR117214.12669516.2+ AAGGCAGCATCTGTTCTCTgtaagttgaacaggtt  
ERR117184.20758333.1+ AAGGCAGCATCTGTTCTCTgtaagttgaacaggtt  
ERR117172.22363800.1- AAGGCAGCATCTGTTCTCTgtaagttgaacaggtt  
ERR117160.10839667.1+ AAGGCAGCATCTGTTCTCTgtaagttgaacaggtt  
ERR117213.25383985.2+ AAGGCAGCATCTGTTCTCTgtaagttgaacaggtt  
ERR117184.1045359.1+ AAGGCAGCATCTGTTCTCTgtaagttgaacaggtt  
ERR117158.11622681.1- AAGGCAGCATCTGTTCTCTgtaagttgaacaggtt  
ERR117158.17464169.1- AAGGCAGCATCTGTTCTCTgtaagttgaacaggtt  
ERR117158.17464169.2+ AAGGCAGCATCTGTTCTCTgtaagttgaacaggtt  
ERR117158.9230335.1- AAGGCAGCATCTGTTCTCTgtaagttgaacaggtt  
ERR117159.1161003.1+ AAGGCAGCATCTGTTCTCTgtaagttgaacaggtt  
ERR117159.15086134.1+ AAGGCAGCATCTGTTCTCTgtaagttgaacaggtt  
ERR117162.29184588.1- AAGGCAGCATCTGTTCTCTgtaagttgaacaggtt  
ERR117162.7835727.1+ AAGGCAGCATCTGTTCTCTgtaagttgaacaggtt  
ERR117167.20252206.1+ AAGGCAGCATCTGTTCTCTgtaagttgaacaggtt  
ERR117167.6958174.1+ AAGGCAGCATCTGTTCTCTgtaagttgaacaggtt  
ERR117167.9426509.1+ AAGGCAGCATCTGTTCTCTgtaagttgaacaggtt  
ERR117168.10534830.1+ AAGGCAGCATCTGTTCTCTgtaagttgaacaggtt  
ERR117168.19739446.1+ AAGGCAGCATCTGTTCTCTgtaagttgaacaggtt  
ERR117169.15062876.1+ AAGGCAGCATCTGTTCTCTgtaagttgaacaggtt  
ERR117170.18019832.1- AAGGCAGCATCTGTTCTCTgtaagttgaacaggtt  
ERR117170.18440732.2- AAGGCAGCATCTGTTCTCTgtaagttgaacaggtt  
ERR117170.3438595.1- AAGGCAGCATCTGTTCTCTgtaagttgaacaggtt  
ERR117171.22484358.1- AAGGCAGCATCTGTTCTCTgtaagttgaacaggtt  
ERR117171.22772451.1+ AAGGCAGCATCTGTTCTCTgtaagttgaacaggtt  
ERR117171.23237058.1- AAGGCAGCATCTGTTCTCTgtaagttgaacaggtt  
ERR117172.14663654.2- AAGGCAGCATCTGTTCTCTgtaagttgaacaggtt  
ERR117173.10498732.1- AAGGCAGCATCTGTTCTCTgtaagttgaacaggtt  
ERR117173.386521.1- AAGGCAGCATCTGTTCTCTgtaagttgaacaggtt  
ERR117184.9889636.1- AAGGCAGCATCTGTTCTCTgtaagttgaacaggtt  
ERR117185.10160607.1- AAGGCAGCATCTGTTCTCTgtaagttgaacaggtt  
ERR117185.18468589.1- AAGGCAGCATCTGTTCTCTgtaagttgaacaggtt  
ERR117185.19578803.1- AAGGCAGCATCTGTTCTCTgtaagttgaacaggtt  
ERR117185.25418354.1- AAGGCAGCATCTGTTCTCTgtaagttgaacaggtt  
ERR117186.15047856.2- AAGGCAGCATCTGTTCTCTgtaagttgaacaggtt  
ERR117186.18182009.1- AAGGCAGCATCTGTTCTCTgtaagttgaacaggtt  
ERR117188.12142941.1+ AAGGCAGCATCTGTTCTCTgtaagttgaacaggtt  
ERR117189.14477456.2- AAGGCAGCATCTGTTCTCTgtaagttgaacaggtt  
ERR117189.17247817.2- AAGGCAGCATCTGTTCTCTgtaagttgaacaggtt  
ERR117189.21787522.1- AAGGCAGCATCTGTTCTCTgtaagttgaacaggtt  
ERR117190.12805217.1+ AAGGCAGCATCTGTTCTCTgtaagttgaacaggtt  
ERR117191.2740877.1- AAGGCAGCATCTGTTCTCTgtaagttgaacaggtt  
ERR117191.3942459.2- AAGGCAGCATCTGTTCTCTgtaagttgaacaggtt  
ERR117191.5977567.2+ AAGGCAGCATCTGTTCTCTgtaagttgaacaggtt  
ERR117195.13241995.1- AAGGCAGCATCTGTTCTCTgtaagttgaacaggtt  
ERR117195.14059793.1- AAGGCAGCATCTGTTCTCTgtaagttgaacaggtt  
ERR117195.19851398.2- AAGGCAGCATCTGTTCTCTgtaagttgaacaggtt  
ERR117195.19875258.1- AAGGCAGCATCTGTTCTCTgtaagttgaacaggtt  
ERR117195.20783572.2- AAGGCAGCATCTGTTCTCTgtaagttgaacaggtt  
ERR117195.24277877.1+ AAGGCAGCATCTGTTCTCTgtaagttgaacaggtt  
ERR117195.25470877.1+ AAGGCAGCATCTGTTCTCTgtaagttgaacaggtt  
ERR117195.25471015.1+ AAGGCAGCATCTGTTCTCTgtaagttgaacaggtt  
ERR117195.5194609.2- AAGGCAGCATCTGTTCTCTgtaagttgaacaggtt  
ERR117195.6845458.1- AAGGCAGCATCTGTTCTCTgtaagttgaacaggtt  
ERR117200.11660475.1+ AAGGCAGCATCTGTTCTCTgtaagttgaacaggtt  
ERR117200.4827260.1+ AAGGCAGCATCTGTTCTCTgtaagttgaacaggtt  
ERR117200.4919005.1- AAGGCAGCATCTGTTCTCTgtaagttgaacaggtt

ERR117202.4492296.1+ AAGGCAGCATCTGCTTCTCTgtaagttgaacaggtttcctctttgtcccacgctgccaa  
ERR117203.3734878.2- AAGGCAGCATCTGCTTCTCTgtaagttgaacaggtttcctctttgtcccacgctgccaa  
ERR117205.11725674.1+ AAGGCAGCATCTGCTTCTCTgtaagttgaacaggtttcctctttgtcccacgctgccaa  
ERR117205.12765034.1+ AAGGCAGCATCTGCTTCTCTgtaagttgaacaggtttcctctttgtcccacgctgccaa  
ERR117205.18084573.1+ AAGGCAGCATCTGCTTCTCTgtaagttgaacaggtttcctctttgtcccacgctgccaa  
ERR117205.20836240.1+ AAGGCAGCATCTGCTTCTCTgtaagttgaacaggtttcctctttgtcccacgctgccaa  
ERR117205.21325428.2- AAGGCAGCATCTGCTTCTCTgtaagttgaacaggtttcctctttgtcccacgctgccaa  
ERR117205.21962995.2- AAGGCAGCATCTGCTTCTCTgtaagttgaacaggtttcctctttgtcccacgctgccaa  
ERR117205.3064670.2- AAGGCAGCATCTGCTTCTCTgtaagttgaacaggtttcctctttgtcccacgctgccaa  
ERR117206.2892479.2+ AAGGCAGCATCTGCTTCTCTgtaagttgaacaggtttcctcttctgtcccacgctgccaa  
ERR117209.1866596.1+ AAGGCAGCATCTGCTTCTCTgtaagttgaacaggtttcctcttctgtcccacgctgccaa  
ERR117209.2234770.1- AAGGCAGCATCTGCTTCTCTgtaagttgaacaggtttcctcttctgtcccacgctgccaa  
ERR117210.15005312.1- AAGGCAGCATCTGCTTCTCTgtaagttgaacaggtttcctcttctgtcccacgctgccaa  
ERR117210.16500830.1- AAGGCAGCATCTGCTTCTCTgtaagttgaacaggtttcctcttctgtcccacgctgccaa  
ERR117210.16854114.1- AAGGCAGCATCTGCTTCTCTgtaagttgaacaggtttcctcttctgtcccacgctgccaa  
ERR117210.21340502.1- AAGGCAGCATCTGCTTCTCTgtaagttgaacaggtttcctcttctgtcccacgctgccaa  
ERR117210.4356481.1- AAGGCAGCATCTGCTTCTCTgtaagttgaacaggtttcctcttctgtcccacgctgccaa  
ERR117210.6082569.1- AAGGCAGCATCTGCTTCTCTgtaagttgaacaggtttcctcttctgtcccacgctgccaa  
ERR117211.10773022.2+ AAGGCAGCATCTGCTTCTCTgtaagttgaacaggtttcctcttctgtcccacgctgccaa  
ERR117211.13982774.2- AAGGCAGCATCTGCTTCTCTgtaagttgaacaggtttcctcttctgtcccacgctgccaa  
ERR117211.4852441.2- AAGGCAGCATCTGCTTCTCTgtaagttgaacaggtttcctcttctgtcccacgctgccaa  
ERR117211.4957486.2- AAGGCAGCATCTGCTTCTCTgtaagttgaacaggtttcctcttctgtcccacgctgccaa  
ERR117211.6530188.1- AAGGCAGCATCTGCTTCTCTgtaagttgaacaggtttcctcttctgtcccacgctgccaa  
ERR117211.7038507.2- AAGGCAGCATCTGCTTCTCTgtaagttgaacaggtttcctcttctgtcccacgctgccaa  
ERR117212.13913207.1- AAGGCAGCATCTGCTTCTCTgtaagttgaacaggtttcctcttctgtcccacgctgccaa  
ERR117212.16686714.1- AAGGCAGCATCTGCTTCTCTgtaagttgaacaggtttcctcttctgtcccacgctgccaa  
ERR117212.18402684.1- AAGGCAGCATCTGCTTCTCTgtaagttgaacaggtttcctcttctgtcccacgctgccaa  
ERR117212.9510103.1- AAGGCAGCATCTGCTTCTCTgtaagttgaacaggtttcctcttctgtcccacgctgccaa  
ERR117213.25383985.1- AAGGCAGCATCTGCTTCTCTgtaagttgaacaggtttcctcttctgtcccacgctgccaa  
ERR117214.16394658.1- AAGGCAGCATCTGCTTCTCTgtaagttgaacaggtttcctcttctgtcccacgctgccaa  
ERR117214.17076092.1+ AAGGCAGCATCTGCTTCTCTgtaagttgaacaggtttcctcttctgtcccacgctgccaa  
ERR117214.5729010.2+ AAGGCAGCATCTGCTTCTCTgtaagttgaacaggtttcctcttctgtcccacgctgccaa  
ERR117185.10163404.1+ GGCAGCATCTGCTTCTCTgtaagttgaacaggtttcctcttctgtcccacgctgccaa  
ERR117209.885141.2+ AGCATCTGCTTCTCTgtaagttgaacaggtttcctcttctgtcccacgctgccaa  
ERR117162.26586686.1- GCATCTGCTTCTCTgtaagttgaacaggtttcctcttctgtcccacgctgccaa  
ERR117173.12302743.1- CTGCTTCTCTgtaagttgaacaggtttcctcttctgtcccacgctgccaa  
ERR117170.12241048.1+ TGCTTCTCTgtaagttgaacaggtttcctcttctgtcccacgctgccaa  
ERR117188.9453026.2- CTCTgtaagttgaacaggtttcctcttctgtcccacgctgccaa  
ERR117213.20416582.2+ Tgtaagttgaacaggtttcctcttctgtcccacgctgccaa

consensus

AAGGCAGCATCTGCTTCTCTgtaagttgaacaggtttcctcttctgtcccacgctgccaa

---

## F. Zebra finch (No. 7), exon 1, WGS data

- CAP3 alignment of WGS data spanning exon 1 (uppercase letters)

```
1239865472+ gtttctcctggctgcccgaatgtaccagcaagactcagagactgcagagATGAT
1219534330- gtttctcctagctgcccgaagtaccagcaagactcagagactgcagagATGATGGTGATC
1230596782+ gtttctcctagctgcccgaagtaccagcaagactcagagactgcagagATGATGGTGATC
1231322579- gtttctcctggctgcccgaagtaccagcaagactcagagactgcagagATGATGGTGATC
1231538640- gtttctcctggctgcccgaagtaccagcaagactcagagactgcagagATGATGGTGATC
1404858879- gtttctcctggctgcccgaagtaccagcaagactcagagactgcagagATGATGGTGATC
1267622776- caagactcagagactgcagagATGATGGTGATC
1252412210- gagactgcagagATGATGGTGATC
1423366051- GTGATC
```

consensus gtttctcctggctgcccgaagtaccagcaagactcagagactgcagagATGATGGTGATC

```
1219534330- TTTTCAGGAATCAAG-AGAATGCTCTTCCTTTTGTTCCTTCCTGCTGCTGG-CCAGC
1230596782+ TTTTCAGGAATCAAG-AGAATGCTCTTCCTTTTGTTCCTTCCTGCTGCTGG-CCAGC
1231322579- TTTTCAGGAATCAAG-AGAATGCTCTTCCTTTTGTTCCTTCCTGCTGCTGG-CCAGC
1231538640- -TTTCAGGAATCAAG-AGAATGCTCTTCCTTTTGTTCCTTCCTGCTGCTGG-CCAGC
1252412210- TTTTCAGGAATCAAGAAGAATGCTCTTCCTTTTGTTCCTTCCTGCTGCTGT-CT-GACCAGC
1267622776- TTTTCAGGAATCAAG-AGAATGCTCTTCCTTTTGTTCCTTCCTGCTGCTGGCCAGC
1404858879- TTTTCAGGAATCAAG-AGAATGCTCTTCCTTTTGTTCCTTCCTGCTGCTGG-CCAGC
1423366051- TTTTCAGGAATCAAG-AGAATGCTCTT-CATTTGTTCCTTCCTGCTGCTGG-CCAGC
1230149097- CTGTCATCTGTTCTGG-CCAGC
```

consensus TTTTCAGGAATCAAG-AGAATGCTCTTCCTTTTGTTCCTTCCTGCTGCTGG-CCAGC

```
1219534330- TTGCATCT-CCACTGTTGAGTTTCTCCACCTT-CCTGGATCCTTCTAGCATGTTCCACCT
1230149097- TTGCATCT-CCACTGCTGCGTTTCTCCACCTT-CCTGGATCCTTCTAGCATGTTCCACCT
1230596782+ TTGCATCT-CCACTGTTGAGTTTCTCCACCTT-CCTGGATCCTTCTAGCATGTTCCACCT
1231322579- TTGCATCT-CCACTGCTGCGTTTCTCCACCTT-CCTGGATCCTTCTAGCATGTTCCACCT
1231538640- TTGCATCT-CCACTGCTGCGTTTCTCCACCTTTCCTGGATCCTTCTAGCATGTTCCACCT
1252412210- TTGCATCT-CCACTGTTGAGTTTCTCCACCTTCTCCACCTTCTGGATCCTTCTAGCATGTTCCACCT
1267622776- TTGCATCT-CCACTGTTGAGTTTCTCCACCTTTCCTGGATCCTTCTAGCATGTTCCACCT
1404858879- TTGCATCT-CCACTGCTGCGTTTCTCCACCTT-CCTGGATCCTTCTAGCATGTTCCACCT
1423366051- TTGCATCTACCCTGGTGGTTTCTCCACCTTTCCTGGATC-ATCTAGCATGTTCCACCT
1400577008- CT
```

consensus TTGCATCT-CCACTGCTGCGTTTCTCCACCTT-CCTGGATCCTTCTAGCATGTTCCACCT

```
1230149097- C
1219534330- CTGCTGGG-ACCATGAGGAACAGGAGCTGATGGGGTTGAGCTGCACATCCACGCTGCCTC
1230596782+ CTGCTGGG-ACCATGAGGAACAGGAGCTGATGGGGTTGAGCTGCACATCCACGCTGCCTC
1231322579- CTGCTGGG-ACCATGAGGAACAGGAGCTGATGGGGTTGAGCTGCACATCCACACTGCCTC
1231538640- CTGCTGGG-ACCATGAGGAACAGGAGCTGATGGGGTTGAGCTGCACATCCACACTGCCTC
1252412210- CTGCTGGG-ACCATGAGGAACAGGAGCTGATGGGGTTGAGCTGCACATCCACGCTGCCTC
1267622776- CTGCTGGG-ACCATGAGGAACAGGAGCTGATGGGGTTGAGCTGCACATCCACGCTGCCTC
1400577008- CTGCTGGG-ACCATGAGGAACAGGAGCTGATGGGGTTGAGCTGCACATCCACGCTGCCTC
1404858879- CTGCTGGG-ACCATGAGGAACAGGAGCTGATGGGGTTGAGCTGCACATCCACACTGCCTC
1423366051- CTGCTGGGAACCATGAGGAACAGGAGCTGATGGGGTTGAGCTGCACATCCACGCTGCCTC
```

consensus CTGCTGGG-ACCATGAGGAACAGGAGCTGATGGGGTTGAGCTGCACATCCACGCTGCCTC

```
1404858879- ATCCACACTGTAGATTCAGCTATCATGGAGAGCTGCCTGGATC
1231322579- ATCCACACTGTAGATTCAGCTATCATGGAGAGCTGCCTGGATCTGACATTTGTGACAGGAG
1219534330- ATCCACACTGTAGATTCAGCTATCATGGAGAGCTGCCTGGATCTGACATTTGTGACAGGAG
1230596782+ ATCCACACTGTAGATTCAGCTATCATGGAGAGCTGCCTGGATCTGACATTTGTGACAGGAG
1231538640- ATCCACACTGTAGATTCAGCTATCATGGAGAGCTGCCTGGATCTGACATTTGTGACAGGAG
1252412210- ATCCACACTGTAGATTCAGCTATCATGGAGAGCTGCCTGGATCTGACATTTGTGACAGGAG
1267622776- ATCCACACTGTAGATTCAGCTATCATGGAGAGCTGCCTGGATCTGACATTTGTGACAGGAG
1400577008- ATCCACACTGTAGATTCAGCTATCATGGAGAGCTGCCTGGATCTGACATTTGTGACAGGAG
1423366051- ATCCACACTGTAGATTCAGCTATCATGGAGAGCTGCCTGGATCTGACATTTGTGACAGGAG
1389006827- CACACTGTAGATTCAGCTATCATGGAGAGCTGCCTGGATCTGACA-IGTGACAGGAG
1286248790- CAGCTATCATGGAGAGCTGCCTGGATCTGACATTTGTGACAGGAG
```

consensus ATCCACACTGTAGATTCAGCTATCATGGAGAGCTGCCTGGATCTGACATTTGTGACAGGAG

```
1230596782+ GTGCTTTCTGAAAT-GGCAGCATCTGCATCTCTgtaagttgaacagatat
1219534330- GTGCTTTCTGAAAT-GGCAGCATCTGCATCTCTgtaagttgaacagatatcctcttcatc
1231538640- GTGCTTTCTGAAAT-GGCAGCATCTGCATCTCTgtaagttgaacagatatcctcttcatc
1252412210- GTGCTTTCTGAAAT-GGCAGCATCTGCATCTCTgtaagttgaacagatatcctcttcatc
1267622776- GTGCTTTCTGAAAT-GGCAGCATCTGCATCTCTgtaagttgaacagatatcctcttcatc
1286248790- GTGCTTTCTGAAAT-GGCAGCATCTGCATCTCTgtaag-tgaacagatatcctct----c
```

|             |                                                              |
|-------------|--------------------------------------------------------------|
| 1389006827- | GTGCTTTCTGAAAT-GGCAGCATCTGCATCTCTgtaagttgaacagatatcctcttcatc |
| 1400577008- | GTGC-TTCTGAAAT-GGCAGCATCTGCATCTCTgtaagttgaacagatatcctcttcatc |
| 1423366051- | GTGCTTTCTGAAATGGGCAGCATCTGCATCTCTgtaagttgaacagatatcctcttcatc |
| consensus   | GTGCTTTCTGAAAT-GGCAGCATCTGCATCTCTgtaagttgaacagatatcctcttcatc |

---

## G. Medium ground finch (No. 9), exon 1, WGS data

- CAP3 alignment of WGS data spanning exon 1 (uppercase letters)

```
. : . : . : . : . :  
SRR448675.100479892.1+ ctaactgccaaggtatcagcaagacttggagactgagagATG  
SRR448675.69549168.1+ ctaactgccaaggtatcagcaagacttagagactgagagATG  
SRR448681.82948658.1+ ctaactgccaaggtatcagcaagacttggagactgagagATG  
SRR448675.1007017.1+ ctaactgccaaggtatcagcaagacttggagactgagagATGAT  
SRR448675.5778478.1- ctaactgccaaggtatcagcaagacttggagactgagagATGAT  
SRR448681.104812713.1- ctaactgccaaggtatcagcaagacttggagactgagagATGAT  
SRR448681.113966051.1- ctaactgccaaggtatcagcaagacttggagactgagagATGATG  
SRR448690.3092766.2+ ctaactgccaaggtatcagcaagacttggagactgagagATGATGT  
SRR448690.41354884.2+ ctaactgccaaggtatcagcaagacttggagactgagagATGATGT  
SRR448683.104535904.1+ ctaactgccaaggtatcagcaagacttggagactgagagATGATGTT  
SRR448688.92491247.2+ ctaactgccaaggtatcagcaagacttggagactgagagATGATGTTG  
SRR448686.103495169.2- ctaactgccaaggtatcagcaagacttggagactgagagATGATGTTGA  
SRR448687.77379032.1- ctaactgccaaggtatcagcaagacttggagactgagagATGATGTTGAT  
SRR448681.13943690.2+ ctaactgccaaggtatcagcaagacttggagactgagagATGATGTTGATG  
SRR448681.90158569.2- ctaactgccaaggtatcagcaagacttggagactgagagATGATGTTGATG  
SRR448683.93320995.1- ctaactgccaaggtatcagcaagacttggagactgagagATGATGTTGATG  
SRR448686.26288542.2- ctaactgccaaggtatcagcaagacttggagactgagagATGATGTTGATG  
SRR448686.27936370.2+ ctaactgccaaggtatcagcaagacttggagactgagagATGATGTTGATG  
SRR448686.49278550.2+ ctaactgccaaggtatcagcaagacttggagactgagagATGATGTTGATG  
SRR448686.95288214.2+ ctaactgccaaggtatcagcaagacttggagactgagagATGATGTTGATG  
SRR448681.14983340.1+ ctaactgccaaggtatcagcaagacttggagactgagagATGATGTTGATGT  
SRR448687.3421469.1- ctaactgccaaggtatcagcaagacttggagactgagagATGATGTTGATGT  
SRR448686.31721987.2+ ctaactgccaaggtatcagcaagacttggagactgagagATGATGTTGATGTT  
SRR448686.95288214.2+ ctaactgccaaggtatcagcaagacttggagactgagagATGATGTTGATGTT  
SRR448681.107485952.2- ctaactgccaaggtatcagcaagacttggagactgagagATGATGTTGATGTTCT  
SRR448683.91763429.1- ctaactgccaaggtatcagcaagacttggagactgagagATGATGTTGATGTTCT  
SRR448687.500212.2- ctaactgccaaggtatcagcaagacttggagactgagagATGATGTTGATGTTCT  
SRR448681.37781787.1- ctaactgccaaggtatcagcaagacttggagactgagagATGATGTTGATGTTCTT  
SRR448675.105142019.2+ ctaactgccaaggtatcagcaagacttggagactgagagATGATGTTGATGTTCTTCCC  
SRR448675.30107343.1- ctaactgccaaggtatcagcaagacttggagactgagagATGATGTTGATGTTCTTCCC  
SRR448675.34632732.2+ ctaactgccaaggtatcagcaagacttggagactgagagATGATGTTGATGTTCTTCCC  
SRR448675.47505994.2- ctaactgccaaggtatcagcaagacttggagactgagagATGATGTTGATGTTCTTCCC  
SRR448675.48792349.2- ctaactgccaaggtatcagcaagacttggagactgagagATGATGTTGATGTTCTTCCC  
SRR448675.59624787.1- ctaactgccaaggtatcagcaagacttggagactgagagATGATGTTGATGTTCTTCCC  
SRR448675.61033335.1+ ctaactgccaaggtatcagcaagacttggagactgagagATGATGTTGATGTTCTTCCC  
SRR448675.61454794.1+ ctaactgccaaggtatcagcaagacttggagactgagagATGATGTTGATGTTCTTCCC  
SRR448675.68583665.1- ctaactgccaaggtatcagcaagacttggagactgagagATGATGTTGATGTTCTTCCC  
SRR448675.73902527.2+ ctaactgccaaggtatcagcaagacttggagactgagagATGATGTTGATGTTCTTCCC  
SRR448675.76019197.1- ctaactgccaaggtatcagcaagacttggagactgagagATGATGTTGATGTTCTTCCC  
SRR448675.89618126.2+ ctaactgccaaggtatcagcaagacttggagactgagagATGATGTTGATGTTCTTCCC  
SRR448675.91257091.1+ ctaactgccaaggtatcagcaagacttggagactgagagATGATGTTGATGTTCTTCCC  
SRR448681.100625135.2- ctaactgccaaggtatcagcaagacttggagactgagagATGATGTTGATGTTCTTCCC  
SRR448681.103745259.1+ ctaactgccaaggtatcagcaagacttggagactgagagATGATGTTGATGTTCTTCCC  
SRR448681.114016387.2- ctaactgccaaggtatcagcaagacttggagactgagagATGATGTTGATGTTCTTCCC  
SRR448681.24063966.1- ctaactgccaaggtatcagcaagacttggagactgagagATGATGTTGATGTTCTTCCC  
SRR448681.4029888.1+ ctaactgccaaggtatcagcaagacttggagactgagagATGATGTTGATGTTCTTCCC  
SRR448681.59142577.1+ ctaactgccaaggtatcagcaagacttggagactgagagATGATGTTGATGTTCTTCCC  
SRR448681.66970561.2+ ctaactgccaaggtatcagcaagacttggagactgagagATGATGTTGATGTTCTTCCC  
SRR448681.70988830.1+ ctaactgccaaggtatcagcaagacttggagactgagagATGATGTTGATGTTCTTCCC  
SRR448681.7905433.2+ ctaactgccaaggtatcagcaagacttggagactgagagATGATGTTGATGTTCTTCCC  
SRR448681.80008393.2+ ctaactgccaaggtatcagcaagacttggagactgagagATGATGTTGATGTTCTTCCC  
SRR448681.80676895.1+ ctaactgccaaggtatcagcaagacttggagactgagagATGATGTTGATGTTCTTCCC  
SRR448681.8573045.1+ ctaactgccaaggtatcagcaagacttggagactgagagATGATGTTGATGTTCTTCCC  
SRR448681.94680159.2+ ctaactgccaaggtatcagcaagacttggagactgagagATGATGTTGATGTTCTTCCC  
SRR448681.98576512.1- ctaactgccaaggtatcagcaagacttggagactgagagATGATGTTGATGTTCTTCCC  
SRR448683.100160277.1- ctaactgccaaggtatcagcaagacttggagactgagagATGATGTTGATGTTCTTCCC  
SRR448683.36676326.2- ctaactgccaaggtatcagcaagacttggagactgagagATGATGTTTATGTTCTTCCC  
SRR448683.37283289.2- ctaactgccaaggtatcagcaagacttggagactgagagATGATGTTGATGTTCTTCCC  
SRR448683.39705.1+ ctaactgccaaggtatcagcaagacttggagactgagagATGATGTTGATGTTCTTCCC  
SRR448683.57387180.2+ ctaactgccaaggtatcagcaagacttggagactgagagATGATGTTGATGTTCTTCCC  
SRR448683.75617016.1- ctaactgccaaggtatcagcaagacttggagactgagagATGATGTTGATGTTCTTCCC  
SRR448683.77248776.2- ctaactgccaaggtatcagcaagacttggagactgagagATGATGTTGATGTTCTTCCC  
SRR448683.8327371.2+ ctaactgccaaggtatcagcaagacttggagactgagagATGATGTTGATGTTCTTCCC  
SRR448683.94768504.1- ctaactgccaaggtatcagcaagacttggagactgagagATGATGTTGATGTTCTTCCC  
SRR448683.99125569.1- ctaactgccaaggtatcagcaagacttggagactgagagATGATGTTGATGTTCTTCCC  
SRR448686.14816400.2+ ctaactgccaaggtatcagcaagacttggagactgagagATGATGTTGATGTTCTTCCC  
SRR448686.18360119.1- ctaactgccaaggtatcagcaagacttggagactgagagATGATGTTGATGTTCTTCCC  
SRR448686.36602792.2+ ctaactgccaaggtatcagcaagacttggagactgagagATGATGTTGATGTTCTTCCC  
SRR448686.37906446.1+ ctaactgccaaggtatcagcaagacttggagactgagagATGATGTTGATGTTCTTCCC  
SRR448686.99095226.1- ctaactgccaaggtatcagcaagacttggagactgagagATGATGTTGATGTTCTTCCC  
SRR448687.1959505.1- ctaactgccaaggtatcagcaagacttggagactgagagATGATGTTGATGTTCTTCCC  
SRR448687.19667835.1- ctaactgccaaggtatcagcaagacttggagactgagagATGATGTTGATGTTCTTCCC  
SRR448687.30037127.2+ ctaactgccaaggtatcagcaagacttggagactgagagATGATGTTGATGTTCTTCCC  
SRR448687.3580770.1- ctaactgccaaggtatcagcaagacttggagactgagagATGATGTTGATGTTCTTCCC  
SRR448687.52301939.1- ctaactgccaaggtatcagcaagacttggagactgagagATGATGTTGATGTTCTTCCC
```

SRR448687.67270793.1+ ctaactgccaaggtatcagcaagacttggagactgagagATGATGTTGATGTTCTTCCC  
SRR448687.78219029.1+ ctaactgccaaggaatcagcaagacttggagactgagagATGATGTTGATGTTCTTCCC  
SRR448687.8466327.1+ ctaactgccaaggtatcagcaagacttggagactgagagATGATGTTGATGTTCTTCCC  
SRR448687.85478227.2- ctaactgccaaggtatcagcaagacttggagactgagagATGATGTTGATGTTCTTCCC  
SRR448687.91479653.1- ctaactgccaaggtatcagcaagacttggagactgagagATGATGTTGATGTTCTTCCC  
SRR448687.93646354.1+ ctaactgccaaggtatcagcaagacttggagactgagagATGATGTTGATGTTCTTCCC  
SRR448686.14112130.1+ taactgccaaggtatcagcaagacttggagactgagagATGATGTTGATGTTCTTCCC  
SRR448686.29349064.2- taactgccaaggtatcagcaagacttggagactgagagATGATGTTGATGTTCTTCCC  
SRR448687.26806833.2+ taactgccaaggtatcagcaagacttggagactgagagATGATGTTGATGTTCTTCCC  
SRR448675.55807871.1- actgccaaggtatcagcaagacttggagactgagagATGATGTTGATGTTCTTCCC  
SRR448686.58001144.2+ actgccaaggtatcagcaagacttggagactgagagATGATGTTGATGTTCTTCCC  
SRR448694.31414169.1- tgccaaggtatcagcaagacttggagactgagagATGATGTTGATGTT  
SRR448675.100479892.2- tgccaaggtatcagcaagacttggagactgagagATGATGTTGATGTTCTTCCC  
SRR448675.69549168.2- tgccaaggtatcagcaagacttggagactgagagATGATGTTGATGTTCTTCCC  
SRR448681.51654459.2- tgccaaggtatcagcaagacttggagactgagagATGATGTTGATGTTCTTCCC  
SRR448702.17838171.2+ gccaaggtatcagcaagacttggagactgagagATGATGTTGATGTTCTTCCC  
SRR448702.22794598.2+ gccaaggtatcagcaagacttggagactgagagATGATGTTGATGTTCTTCCC  
SRR448702.25453408.2+ gccaaggtatcagcaagacttggagactgagagATGATGTTGATGTTCTTCCC  
SRR448702.3330112.2+ gccaaggtatcagcaagacttggagactgagagATGATGTTGATGTTCTTCCC  
SRR448702.45203147.2+ gccaaggtatcagcaagacttggagactgagagATGATGTTGATGTTCTTCCC  
SRR448702.51353857.2+ gccaaggtatcagcaagacttggagactgagagATGATGTTGATGTTCTTCCC  
SRR448702.52718704.2+ gccaaggtatcagcaagacttggagactgagagATGATGTTGATGTTCTTCCC  
SRR448702.54146257.2+ gccaaggtatcagcaagacttggagactgagagATGATGTTGATGTTCTTCCC  
SRR448702.88727150.2+ gccaaggtatcagcaagacttggagactgagagATGATGTTGATGTTCTTCCC  
SRR448681.111896412.2- gccaaggtatcagcaagacttggagactgagagATGATGTTGATGTTCTTCCC  
SRR448683.85289444.2+ gccaaggtatcagcaagacttggagactgagagATGATGTTGATGTTCTTCCC  
SRR448675.24488131.1+ cccaaggtatcagcaagacttggagactgagagATGATGTTGATGTTCTTCCC  
SRR448681.22542882.2+ cccaaggtatcagcaagacttggagactgagagATGATGTTGATGTTCTTCCC  
SRR448690.74370714.1- cccaaggtatcagcaagacttggagactgagagATGATGTTGATGTTCTTCCC  
SRR448690.94429022.1- cccaaggtatcagcaagacttggagactgagagATGATGTTGATGTTCTTCCC  
SRR448694.63844295.1+ caaggtatcagcaagacttggagactgagagATGATGTTGATGTTCTTCCC  
SRR448694.7228368.1+ caaggtatcagcaagacttggagactgagagATGATGTTGATGTTCTTCCC  
SRR448683.80039025.1+ caaggtatcagcaagacttggagactgagagATGATGTTGATGTTCTTCCC  
SRR448702.15399809.2+ aaggtatcagcaagacttggagactgagagATGATGTTGATGTTCTTCCC  
SRR448702.24642302.2+ aaggtatcagcaagacttggagactgagagATGATGTTGATGTTCTTCCC  
SRR448702.37895200.2+ aaggtatcagcaagacttggagactgagagATGATGTTGATGTTCTTCCC  
SRR448702.38797500.2+ aaggtatcagcaagacttggagactgagagATGATGTTGATGTTCTTCCC  
SRR448702.48115865.2+ aaggtatcagcaagacttggagactgagagATGATGTTGATGTTCTTCCC  
SRR448702.87787709.2+ aaggtatcagcaagacttggagactgagagATGATGTTGATGTTCTTCCC  
SRR448702.91460362.2+ aaggtatcagcaagacttggagactgagagATGATGTTGATGTTCTTCCC  
SRR448702.93050215.2+ aaggtatcagcaagacttggagactgagagATGATGTTGATGTTCTTCCC  
SRR448702.94097808.2+ aaggtatcagcaagacttggagactgagagATGATGTTGATGTTCTTCCC  
SRR448681.68433421.1- aaggtatcagcaagacttggagactgagagATGATGTTGATGTTCTTCCC  
SRR448683.12657253.1+ aaggtatcagcaagacttggagactgagagATGATGTTGATGTTCTTCCC  
SRR448687.27436536.1- aaggtatcagcaagacttggagactgagagATGATGTTGATGTTCTTCCC  
SRR448681.82948658.2- aggtatcagcaagacttggagactgagagATGATGTTGATGTTCTTCCC  
SRR448681.107967200.2- gtatcagcaagacttggagactgagagATGATGTTGATGTTCTTCCC  
SRR448686.102284400.1+ gtatcagcaagacttggagactgagagATGATGTTGATGTTCTTCCC  
SRR448687.54908066.2+ tatcagcaagacttggagactgagagATGATGTTGATGTTCTTCCC  
SRR448675.26299051.2+ atcagcaagacttggagactgagagATGATGTTGATGTTCTTCCC  
SRR448683.38738038.2+ atcagcaagacttggagactgagagATGATGTTGATGTTCTTCCC  
SRR448683.85263611.2+ atcagcaagacttggagactgagagATGATGTTGATGTTCTTCCC  
SRR448686.92859673.1+ atcagcaagacttggagactgagagATGATGTTGATGTTCTTCCC  
SRR448688.1339075.2+ atcagcaagacttggagactgagagATGATGTTGATGTTCTTCCC  
SRR448688.37172419.2+ atcagcaagacttggagactgagagATGATGTTGATGTTCTTCCC  
SRR448688.39785364.2+ atcagcaagacttggagactgagagATGATGTTGATGTTCTTCCC  
SRR448702.21178808.2- atcagcaagacttggagactgagagATGATGTTGATGTTCTTCCC  
SRR448702.32548642.2- atcagcaagacttggagactgagagATGATGTTGATGTTCTTCCC  
SRR448702.35387138.2- atcagcaagacttggagactgagagATGATGTTGATGTTCTTCCC  
SRR448702.52659794.2- atcagcaagacttggagactgagagATGATGTTGATGTTCTTCCC  
SRR448702.57467735.2- atcagcaagacttggagactgagagATGATGTTGATGTTCTTCCC  
SRR448702.60595664.2- atcagcaagacttggagactgagagATGATGTTGATGTTCTTCCC  
SRR448702.86000697.2- atcagcaagacttggagactgagagATGATGTTGATGTTCTTCCC  
SRR448702.91690059.2- atcagcaagacttggagactgagagATGATGTTGATGTTCTTCCC  
SRR448694.50680781.1- cagcaagacttggagactgagagATGATGTTGATGTTCTTCCC  
SRR448699.92483900.2- cagcaagacttggagactgagagATGATGTTGATGTTCTTCCC  
SRR448675.1007017.2- agcaagacttggagactgagagATGATGTTGATGTTCTTCCC  
SRR448683.26530291.1- agcaagacttggagactgagagATGATGTTGATGTTCTTCCC  
SRR448686.37030654.1+ agcaagacttggagactgagagATGATGTTGATGTTCTTCCC  
SRR448686.96851970.2- agcaagacttggagactgagagATGATGTTGATGTTCTTCCC  
SRR448688.29503588.2- agcaagacttggagactgagagATGATGTTGATGTTCTTCCC  
SRR448681.14983340.2- gcaagacttggagactgagagATGATGTTGATGTTCTTCCC  
SRR448683.99769950.2- caagacttggagactgagagATGATGTTGATGTTCTTCCC  
SRR448687.16463223.1+ aagacttggagactgagagATGATGTTGATGTTCTTCCC  
SRR448694.109946173.2+ aagacttggagactgagagATGATGTTGATGTTCTTCCC  
SRR448688.27885175.1+ agacttggagactgagagATGATGTTGATGTTCTTCCC  
SRR448699.30571204.2+ gacttggagactgagagATGATGTTGATGTTCTTCCC  
SRR448686.86332807.2- cttggagactgagagATGATGTTGATGTTCTTCCC  
SRR448687.85324970.2- ttggagactgagagATGATGTTGATGTTCTTCCC  
SRR448702.3724550.1+ ttggagactgagagATGATGTTGATGTTCTTCCC  
SRR448702.50322092.1+ ttggagactgagagATGATGTTGATGTTCTTCCC  
SRR448702.51265716.1+ ttggagactgagagATGATGTTGATGTTCTTCCC  
SRR448702.57520481.1+ ttggagactgagagATGATGTTGATGTTCTTCCC  
SRR448702.59530418.1+ ttggagactgagagATGATGTTGATGTTCTTCCC







SRR448702.10099410.1- AGGAATCAAGAGAATGCTCTT  
SRR448702.16389027.1- AGGAATCAAGAGAATGCTCTT  
SRR448702.19024048.1- AGGAATCAAGAGAATGCTCTT  
SRR448702.26223669.1- AGGAATCAAGAGAATGCTCTT  
SRR448702.26905409.1- AGGAATCAAGAGAATGCTCTT  
SRR448702.37178889.1- AGGAATCAAGAGAATGCTCTT  
SRR448702.38429770.1- AGGAATCAAGAGAATGCTCTT  
SRR448702.39094754.1- AGGAATCAAGAGAATGCTCTT  
SRR448702.42431471.1- AGGAATCAAGAGAATGCTCTT  
SRR448702.63301725.1- AGGAATCAAGAGAATGCTCTT  
SRR448702.72901452.1- AGGAATCAAGAGAATGCTCTT  
SRR448702.81094837.1- AGGAATCAAGAGAATGCTCTT  
SRR448702.81330689.1- AGGAATCAAGAGAATGCTCTT  
SRR448702.83257465.1- AGGAATCAAGAGAATGCTCTT  
SRR448702.93112878.1- AGGAATCAAGAGAATGCTCTT  
SRR448687.3580770.1- AGGAATCAAGAGAATGCTCTT  
SRR448688.33222151.1- AGGAATCAAGAGAATGCTCTT  
SRR448688.48422888.2- AGGAATCAAGAGAATGCTCTT  
SRR448688.5754810.1- AGGAATCAAGAGAATGCTCTT  
SRR448688.60065196.1- AGGAATCAAGAGAATGCTCTT  
SRR448688.71027850.1- AGGAATCAAGAGAATGCTCTT  
SRR448694.37023895.1+ AGGAATCAAGAGAATGCTCTT  
SRR448694.82493274.2- AGGAATCAAGAGAATGCTCTT  
SRR448675.89618126.2+ AGGAATCAAGAGAATGCTCTT  
SRR448694.28589359.1- AGGAATCAAGAGAATGCTCTT  
SRR448681.4029888.1+ AGGAATCAAGAGAATGCTCTT  
SRR448690.2512208.2+ AGGAATCAAGAGAATGCTCTT  
SRR448675.48792349.2- AGGAATCAAGAGAATGCTCTT  
SRR448675.91257091.1+ AGGAATCAAGAGAATGCTCTT  
SRR448683.37283289.2- AGGAATCAAGAGAATGCTCTT  
SRR448683.94768504.1- AGGAATCAAGAGAATGCTCTT  
SRR448686.18360119.1- AGGAATCAAGAGAATGCTCTT  
SRR448687.78219029.1+ AGGAATCAAGAGAATGCTCTT  
SRR448694.18700495.1+ AGGAATCAAGAGAATGCTCTT  
SRR448686.14816400.2+ AGGAATCAAGAGAATGCTCTT  
SRR448687.91479653.1- AGGAATCAAGAGAATGCTCTT  
SRR448675.61033335.1+ AGGAATCAAGAGAATGCTCTT  
SRR448687.67270793.1+ AGGAATCAAGAGAATGCTCTT  
SRR448694.7585788.1- AGGAATCAAGAGAATGCTCTT  
SRR448694.87477746.2- AGGAATCAAGAGAATGCTCTT  
SRR448699.85949089.2+ AGGAATCAAGAGAATGCTCTT  
SRR448681.94680159.2+ AGGAATCAAGAGAATGCTCTT  
SRR448683.75617016.1- AGGAATCAAGAGAATGCTCTT  
SRR448681.7905433.2+ AGGAATCAAGAGAATGCTCTT  
SRR448683.77248776.2- AGGAATCAAGAGAATGCTCTT  
SRR448687.26806833.2+ AGGAATCAAGAGAATGCTCTT  
SRR448702.7291062.2+ AGGAATCAAGAGAATGCTCTT  
SRR448699.11831588.1- AGGAATCAAGAGAATGCTCTT  
SRR448699.59187151.2- AGGAATCAAGAGAATGCTCTT  
SRR448681.80676895.1+ AGGAATCAAGAGAATGCTCTT  
SRR448687.19667835.1- AGGAATCAAGAGAATGCTCTT  
SRR448687.85478227.2- AGGAATCAAGAGAATGCTCTT  
SRR448687.1959505.1- AGGAATCAAGAGAATGCTCTT  
SRR448686.14112130.1+ AGGAATCAAGAGAATGCTCTT  
SRR448686.29349064.2- AGGAATCAAGAGAATGCTCTT  
SRR448699.78372155.2- AGGAATCAAGAGAATGCTCTT  
SRR448690.52210119.2+ AGGAATCAAGAGAATGCTCTT  
SRR448690.7743621.2+ AGGAATCAAGAGAATGCTCTT  
SRR448699.104884924.1+ AGGAATCAAGAGAATGCTCTT  
SRR448675.55807871.1- AGGAATCAAGAGAATGCTCTT  
SRR448686.58001144.2+ AGGAATCAAGAGAATGCTCTT  
SRR448688.56502178.2+ AGGAATCAAGAGAATGCTCTT  
SRR448699.26148630.2- AGGAATCAAGAGAATGCTCTT  
SRR448702.17456697.1- AGGAATCAAGAGAATGCTCTT  
SRR448702.28402283.1- AGGAATCAAGAGAATGCTCTT  
SRR448702.6523881.1- AGGAATCAAGAGAATGCTCTT  
SRR448702.82938393.1- AGGAATCAAGAGAATGCTCTT  
SRR448702.99898637.1- AGGAATCAAGAGAATGCTCTT  
SRR448675.100479892.2- AGGAATCAAGAGAATGCTCTT  
SRR448675.69549168.2- AGGAATCAAGAGAATGCTCTT  
SRR448681.51654459.2- AGGAATCAAGAGAATGCTCTT  
SRR448681.111896412.2- AGGAATCAAGAGAATGCTCTT  
SRR448683.85289444.2+ AGGAATCAAGAGAATGCTCTT  
SRR448675.24488131.1+ AGGAATCAAGAGAATGCTCTT  
SRR448681.22542882.2+ AGGAATCAAGAGAATGCTCTT  
SRR448694.100352330.2- AGGAATCAAGAGAATGCTCTT  
SRR448683.80039025.1+ AGGAATCAAGAGAATGCTCTT  
SRR448688.24392558.1+ AGGAATCAAGAGAATGCTCTT  
SRR448688.70490207.1+ AGGAATCAAGAGAATGCTCTT  
SRR448688.79793784.1+ AGGAATCAAGAGAATGCTCTT  
SRR448688.85235348.1+ AGGAATCAAGAGAATGCTCTT  
SRR448681.68433421.1- AGGAATCAAGAGAATGCTCTT  
SRR448683.12657253.1+ AGGAATCAAGAGAATGCTCTT  
SRR448687.27436536.1- AGGAATCAAGAGAATGCTCTT

SRR448681.82948658.2- AGGAATCAAGAGAATGCTCTTCCTCTTGTTCCTCCCATGCTTTTGTCTGG  
SRR448681.107967200.2- AGGAATCAAGAGAATGCTCTTCCTCTTGTTCCTCCCATGCTTTTGTCTGGCC  
SRR448686.102284400.1+ AGGAATCAAGAGAATGCTCTTCCTCTTGTTCCTCCCATGCTTTTGTCTGGCC  
SRR448687.54908066.2+ AGGAATCAAGAGAATGCTCTTCCTCTTGTTCCTCCCATGCTTTTGTCTGGCCA  
SRR448675.26299051.2+ AGGAATCAAGAGAATGCTCTTCCTCTTGTTCCTCCCATGCTTTTGTCTGGCCAG  
SRR448683.38738038.2+ AGGAATCAAGAGAATGCTCTTCCTCTTGTTCCTCCCATGCTTTTGTCTGGCCAG  
SRR448683.85263611.2+ AGGAATCAAGAGAATGCTCTTCCTCTTGTTCCTCCCATGCTTTTGTCTGGCCAG  
SRR448686.92859673.1+ AGGAATCAAGAGAATGCTCTTCCTCTTGTTCCTCCCATGCTTTTGTCTGGCCAG  
SRR448675.1007017.2- AGGAATCAAGAGAATGCTCTTCCTCTTGTTCCTCCCATGCTTTTGTCTGGCCAGCTT  
SRR448683.26530291.1- AGGAATCAAGAGAATGCTCTTCCTCTTGTTCCTCCCATGCTTTTGTCTGGCCAGCTT  
SRR448686.37030654.1+ AGGAATCAAGAGAATGCTCTTCCTCTTGTTCCTCCCATGCTTTTGTCTGGCCAGCTT  
SRR448686.96851970.2- AGGAATCAAGAGAATGCTCTTCCTCTTGTTCCTCCCATGCTTTTGTCTGGCCAGCTT  
SRR448681.14983340.2- AGGAATCAAGAGAATGCTCTTCCTCTTGTTCCTCCCATGCTTTTGTCTGGCCAGCTT  
SRR448675.105142019.1- AGGAATCAAGAGAATGCTCTTCCTCTTGTTCCTCCCATGCTTTTGTCTGGCCAGCTT  
SRR448675.24551560.1+ AGGAATCAAGAGAATGCTCTTCCTCTTGTTCCTCCCATGCTTTTGTCTGGCCAGCTT  
SRR448675.34632732.1- AGGAATCAAGAGAATGCTCTTCCTCTTGTTCCTCCCATGCTTTTGTCTGGCCAGCTT  
SRR448675.37623604.2+ AGGAATCAAGAGAATGCTCTTCCTCTTGTTCCTCCCATGCTTTTGTCTGGCCAGCTT  
SRR448675.54641135.2+ AGGAATCAAGAGAATGCTCTTCCTCTTGTTCCTCCCATGCTTTTGTCTGGCCAGCTT  
SRR448675.61033335.2- AGGAATCAAGAGAATGCTCTTCCTCTTGTTCCTCCCATGCTTTTGTCTGGCCAGCTT  
SRR448675.61454794.2- AGGAATCAAGAGAATGCTCTTCCTCTTGTTCCTCCCATGCTTTTGTCTGGCCAGCTT  
SRR448675.73902527.1- AGGAATCAAGAGAATGCTCTTCCTCTTGTTCCTCCCATGCTTTTGTCTGGCCAGCTT  
SRR448675.82235779.1+ AGGAATCAAGAGAATGCTCTTCCTCTTGTTCCTCCCATGCTTTTGTCTGGCCAGCTT  
SRR448675.91257091.2- AGGAATCAAGAGAATGCTCTTCCTCTTGTTCCTCCCATGCTTTTGTCTGGCCAGCTT  
SRR448681.103745259.2- AGGAATCAAGAGAATGCTCTTCCTCTTGTTCCTCCCATGCTTTTGTCTGGCCAGCTT  
SRR448681.12918655.1+ AGGAATCAAGAGAATGCTCTTCCTCTTGTTCCTCCCATGCTTTTGTCTGGCCAGCTT  
SRR448681.13943690.1- AGGAATCAAGAGAATGCTCTTCCTCTTGTTCCTCCCATGCTTTTGTCTGGCCAGCTT  
SRR448681.4029888.2- AGGAATCAAGAGAATGCTCTTCCTCTTGTTCCTCCCATGCTTTTGTCTGGCCAGCTT  
SRR448681.59142577.2- AGGAATCAAGAGAATGCTCTTCCTCTTGTTCCTCCCATGCTTTTGTCTGGCCAGCTT  
SRR448681.66970561.1- AGGAATCAAGAGAATGCTCTTCCTCTTGTTCCTCCCATGCTTTTGTCTGGCCAGCTT  
SRR448681.70988830.2- AGGAATCAAGAGAATGCTCTTCCTCTTGTTCCTCCCATGCTTTTGTCTGGCCAGCTT  
SRR448681.80008393.1- AGGAATCAAGAGAATGCTCTTCCTCTTGTTCCTCCCATGCTTTTGTCTGGCCAGCTT  
SRR448681.88931306.1+ AGGAATCAAGAGAATGCTCTTCCTCTTGTTCCTCCCATGCTTTTGTCTGGCCAGCTT  
SRR448681.9386500.2+ AGGAATCAAGAGAATGCTCTTCCTCTTGTTCCTCCCATGCTTTTGTCTGGCCAGCTT  
SRR448683.11200816.2- AGGAATCAAGAGAATGCTCTTCCTCTTGTTCCTCCCATGCTTTTGTCTGGCCAGCTT  
SRR448683.63839307.1+ AGGAATCAAGAGAATGCTCTTCCTCTTGTTCCTCCCATGCTTTTGTCTGGCCAGCTT  
SRR448683.69969075.2+ AGGAATCAAGAGAATGCTCTTCCTCTTGTTCCTCCCATGCTTTTGTCTGGCCAGCTT  
SRR448683.77711223.2+ AGGAATCAAGAGAATGATCTTACTCTTGTTCCTCCCATGCTTTTGTCTGGCCAGCTT  
SRR448683.82663094.2- AGGAATCAAGAGAATGCTCTTCCTCTTGTTCCTCCCATGCTTTTGTCTGGCCAGCTT  
SRR448683.99769950.2- AGGAATCAAGAGAATGCTCTTCCTCTTGTTCCTCCCATGCTTTTGTCTGGCCAGCTT  
SRR448686.102868232.2- AGGAATCAAGAGAATGCTCTTCCTCTTGTTCCTCCCATGCTTTTGTCTGGCCAGCTT  
SRR448686.105571365.2+ AGGAATCAAGAGAATGCTCTTCCTCTTGTTCCTCCCATGCTTTTGTCTGGCCAGCTT  
SRR448686.106701110.2+ AGGAATCAAGAGAATGCTCTTCCTCTTGTTCCTCCCATGCTTTTGTCTGGCCAGCTT  
SRR448686.109419161.1- AGGAATCAAGAGAATGCTCTTCCTCTTGTTCCTCCCATGCTTTTGTCTGGCCAGCTT  
SRR448686.112672816.2- AGGAATCAAGAGAATGCTCTTCCTCTTGTTCCTCCCATGCTTTTGTCTGGCCAGCTT  
SRR448686.116154652.1- AGGAATCAAGAGAATGCTCTTCCTCTTGTTCCTCCCATGCTTTTGTCTGGCCAGCTT  
SRR448686.41318453.1- AGGAATCAAGAGAATGCTCTTCCTCTTGTTCCTCCCATGCTTTTGTCTGGCCAGCTT  
SRR448686.51187136.1+ AGGAATCAAGAGAATGCTCTTCCTCTTGTTCCTCCCATGCTTTTGTCTGGCCAGCTT  
SRR448686.86332807.2- AGGAATCAAGAGAATGCTCTTCCTCTTGTTCCTCCCATGCTTTTGTCTGGCCAGCTT  
SRR448687.16463223.1+ AGGAATCAAGAGAATGCTCTTCCTCTTGTTCCTCCCATGCTTTTGTCTGGCCAGCTT  
SRR448687.40599867.1- AGGAATCAAGAGAATGCTCTTCCTCTTGTTCCTCCCATGCTTTTGTCTGGCCAGCTT  
SRR448687.49807054.1+ AGGAATCAAGAGAATGCTCTTCCTCTTGTTCCTCCCATGCTTTTGTCTGGCCAGCTT  
SRR448687.55441481.1+ AGGAATCAAGAGAATGCTCTTCCTCTTGTTCCTCCCATGCTTTTGTCTGGCCAGCTT  
SRR448687.68896953.1+ AGGAATCAAGAGAATGCTCTTCCTCTTGTTCCTCCCATGCTTTTGTCTGGCCAGCTT  
SRR448687.78234188.2+ AGGAATCAAGAGAATGCTCTTCCTCTTGTTCCTCCCATGCTTTTGTCTGGCCAGCTT  
SRR448687.85324970.2- AGGAATCAAGAGAATGCTCTTCCTCTTGTTCCTCCCATGCTTTTGTCTGGCCAGCTT  
SRR448686.23979878.1+ GGAATCAAGAGAATGCTCTTCCTCTTGTTCCTCCCATGCTTTTGTCTGGCCAGCTT  
SRR448687.86864824.1- GGAATCAAGAGAATGCTCTTCCTCTTGTTCCTCCCATGCTTTTGTCTGGCCAGCTT  
SRR448681.8573045.2- GAATCAAGAGAATGCTCTTCCTCTTGTTCCTCCCATGCTTTTGTCTGGCCAGCTT  
SRR448687.3343710.2+ GAATCAAGAGAATGCTCTTCCTCTTGTTCCTCCCATGCTTTTGTCTGGCCAGCTT  
SRR448684.17743245.1- AATCAAGAGAATGCTCTTCCTCTTGTTCCTCCCATGCTTTTGTCTGGCC  
SRR448699.14233604.2+ ATCAAGAGAATGCTCTTCCTCTTGTTCCTCCCATGCTTTTGTCTGGCC  
SRR448681.7905433.1- ATCAAGAGAATGCTCTTCCTCTTGTTCCTCCCATGCTTTTGTCTGGCCAGCTT  
SRR448683.7171667.2+ ATCAAGAGAATGCTCTTCCTCTTGTTCCTCCCATGCTTTTGTCTGGCCAGCTT  
SRR448684.92432333.2- TCAAGAGAATGCTCTTCCTCTTGTTCCTCCCATGCTTTTGTCTGGCC  
SRR448683.54936564.2- TCAAGAGAATGCTCTTCCTCTTGTTCCTCCCATGCTTTTGTCTGGCCAGCTT  
SRR448675.89618126.1- CAAGAGAATGCTCTTCCTCTTGTTCCTCCCATGCTTTTGTCTGGCCAGCTT  
SRR448686.45764778.1+ CAAGAGAATGCTCTTCCTCTTGTTCCTCCCATGCTTTTGTCTGGCCAGCTT  
SRR448686.62615618.2+ CAAGAGAATGCTCTTCCTCTTGTTCCTCCCATGCTTTTGTCTGGCCAGCTT  
SRR448687.74845974.2+ CAAGAGAATGCTCTTCCTCTTGTTCCTCCCATGCTTTTGTCTGGCCAGCTT  
SRR448675.41712885.1+ AAGAGAATGCTCTTCCTCTTGTTCCTCCCATGCTTTTGTCTGGCCAGCTT  
SRR448686.78672064.1+ AGAGAATGCTCTTCCTCTTGTTCCTCCCATGCTTTTGTCTGGCCAGCTT  
SRR448687.56549641.1+ AGAATGCTCTTCCTCTTGTTCCTCCCATGCTTTTGTCTGGCCAGCTT  
SRR448690.61093805.1+ AGAATGCTCTTCCTCTTGTTCCTCCCATGCTTTTGTCTGGCCAGCTT  
SRR448690.80600913.1+ GAATGCTCTTCCTCTTGTTCCTCCCATGCTTTTGTCTGGCCAGCTT  
SRR448681.80676895.2- AATGCTCTTCCTCTTGTTCCTCCCATGCTTTTGTCTGGCCAGCTT  
SRR448681.94680159.1- AATGCTCTTCCTCTTGTTCCTCCCATGCTTTTGTCTGGCCAGCTT  
SRR448687.11814241.1- AATGCTCTTCCTCTTGTTCCTCCCATGCTTTTGTCTGGCCAGCTT  
SRR448683.7145084.1+ ATGCTCTTCCTCTTGTTCCTCCCATGCTTTTGTCTGGCCAGCTT  
SRR448683.8612468.1+ ATGCTCTTCCTCTTGTTCCTCCCATGCTTTTGTCTGGCCAGCTT  
SRR448683.28756459.1+ TGCTCTTCCTCTTGTTCCTCCCATGCTTTTGTCTGGCCAGCTT  
SRR448681.58636992.1+ GCTCTTCCTCTTGTTCCTCCCATGCTTTTGTCTGGCCAGCTT  
SRR448687.46257036.1+ GCTCTTCCTCTTGTTCCTCCCATGCTTTTGTCTGGCCAGCTT  
SRR448681.69796216.1+ CTCTTCCTCTTGTTCCTCCCATGCTTTTGTCTGGCCAGCTT  
SRR448686.109816047.1+ TCTTCCTCTTGTTCCTCCCATGCTTTTGTCTGGCCAGCTT



SRR448688.47771318.2+ GC  
SRR448688.51806068.2+ GC  
SRR448688.71711909.1+ GC  
SRR448688.73119745.1+ GC  
SRR448688.78619446.2+ GC  
SRR448688.89980412.1+ GC

consensus AGGAATCAAGAGAATGCTCTTCCTCTTGTTCCTCCCATGCTTTTGTCTGGCCAGCTTGC

SRR448687.16463223.1+ A  
SRR448686.86332807.2- ATCTC  
SRR448686.116154652.1- ATCTCC  
SRR448687.85324970.2- ATCTCC  
SRR448699.27636387.2- ATCTCC  
SRR448702.18743593.2+ ATCTCC  
SRR448702.36153067.2+ ATCTCC  
SRR448681.13943690.1- ATCTCCTC  
SRR448699.23567757.2+ ATCTCCTC  
SRR448699.61488415.2+ ATCTCCTC  
SRR448687.40599867.1- ATCTCCTCT  
SRR448690.29380968.2- ATCTCCTCT  
SRR448675.54641135.2+ ATCTCCTCTG  
SRR448702.53790654.2+ ATCTCCTCTGA  
SRR448702.79376348.2+ ATCTCCTCTGA  
SRR448702.80270161.2+ ATCTCCTCTGA  
SRR448702.88283448.2+ ATCTCCTCTGA  
SRR448683.77711223.2+ ATCTCCTATGAT  
SRR448690.25858161.1+ ATCTCCTCTGAT  
SRR448690.36379102.1+ ATCTCCTCTGAT  
SRR448690.62562223.1+ ATCTCCTCTGAT  
SRR448690.78220875.1+ ATCTCCTCTGAT  
SRR448681.12918655.1+ ATCTCCTCTGATGC  
SRR448683.63839307.1+ CTCTCCTCTGATGC  
SRR448690.78945613.2- ATCTCCTCTGATGC  
SRR448683.82663094.2- ATCTCCTCTGATGCT  
SRR448681.103745259.2- ATCTCCTCTGATGCTT  
SRR448681.66970561.1- ATCTCCTCTGATGCTT  
SRR448686.112672816.2- ATCTCCTCTGATGCTTT  
SRR448675.61454794.2- ATCTCCTCTGATGCTTTT  
SRR448681.9386500.2+ ATCTCCTCTGATGCTTTT  
SRR448690.11864772.2+ ATCTCCTCTGATGCTTTT  
SRR448690.331272.2+ ATCTCCTCTGATGCTTTT  
SRR448690.36200876.2+ ATCTCCTCTGATGCTTTT  
SRR448690.80958684.2+ ATCTCCTCTGATGCTTTT  
SRR448690.81660724.2+ ATCTCCTCTGATGCTTTT  
SRR448694.75898948.2+ ATCTCCTCTGATGCTTTTC  
SRR448675.82235779.1+ ATCTCCTCTGATGCTTTTCC  
SRR448690.6903614.1- ATCTCCTCTGATGCTTTTCC  
SRR448675.37623604.2+ ATCTCCTCTGATGCTTTTCCCC  
SRR448681.70988830.2- ATCTCCTCTGATGCTTTTCCCC  
SRR448675.105142019.1- ATCTCCTCTGATGCTTTTCCCCAC  
SRR448681.80008393.1- ATCTCCTCTGATGCTTTTCCCCAC  
SRR448686.109419161.1- ATCTCCTCTGATGCTTTTCCCCAC  
SRR448675.73902527.1- ATCTCCTCTGATGCTTTTCCCCACC  
SRR448683.11200816.2- ATCTCCTCTGATGCTTTTCCCCACC  
SRR448681.59142577.2- ATCTCCTCTGATGCTTTTCCCCACCT  
SRR448690.32482994.2- ATCTCCTCTGATGCTTTTCCCCACCTT  
SRR448690.34924895.1- ATCTCCTCTGATGCTTTTCCCCACCTT  
SRR448690.35709700.1- ATCTCCTCTGATGCTTTTCCCCACCTT  
SRR448690.68631968.2- ATCTCCTCTGATGCTTTTCCCCACCTT  
SRR448690.88441719.1- ATCTCCTCTGATGCTTTTCCCCACCTT  
SRR448690.33783403.2+ ATCTCCTCTGATGCTTTTCCCCACCTTCC  
SRR448690.39466210.2+ ATCTCCTCTGATGCTTTTCCCCACCTTCC  
SRR448690.4401988.2+ ATCTCCTCTGATGCTTTTCCCCACCTTCC  
SRR448690.60907104.2+ ATCTCCTCTGATGCTTTTCCCCACCTTCC  
SRR448699.87323970.1- ATCTCCTCTGATGCTTTTCCCCACCTTCC  
SRR448675.24551560.1+ ATCTCCTCTGATGCTTTTCCCCACCTTCCCT  
SRR448675.34632732.1- ATCTCCTCTGATGCTTTTCCCCACCTTCCCTG  
SRR448687.49807054.1+ ATCTCCTCTGATGCTTTTCCCCACCTTCCCTG  
SRR448699.104976401.2+ ATCTCCTCTGATGCTTTTCCCCACCTTCCCTG  
SRR448687.78234188.2+ ATCTCCTCTGATGCTTTTCCCCACCTTCCCTGG  
SRR448681.4029888.2- ATCTCCTCTGATGCTTTTCCCCACCTTCCCTGGATC  
SRR448675.91257091.2- ATCTCCTCTGATGCTTTTCCCCACCTTCCCTGGATC  
SRR448686.105571365.2+ ATCTCCTCTGATGCTTTTCCCCACCTTCCCTGGATC  
SRR448686.102868232.2- ATCTCCTCTGATGCTTTTCCCCACCTTCCCTGGATCC  
SRR448694.94535128.2- ATCTCCTCTGATGCTTTTCCCCACCTTCCCTGGATCC  
SRR448675.61033335.2- ATCTCCTCTGATGCTTTTCCCCACCTTCCCTGGATCCT  
SRR448686.41318453.1- ATCTCCTCTGATGCTTTTCCCCACCTTCCCTGGATCCT  
SRR448687.55441481.1+ ATCTCCTCTGATGCTTTTCCCCACCTTCCCTGGATCCT  
SRR448687.56549641.1+ ATCTCCTCTGATGCTTTTCCCCACCTTCCCTGGATCCTT  
SRR448687.68896953.1+ ATCTCCTCTGATGCTTTTCCCCACCTTCCCTGGATCCTT  
SRR448694.98441280.2- ATCTCCTCTGATGCTTTTCCCCACCTTCCCTGGATCCTT  
SRR448681.88931306.1+ ATCTCCTCTGATGCTTTTCCCCACCTTCCCTGGATCCTTCC

SRR448683.69969075.2+ ATCTCCTCTGATGCTTTTCCCCACCTTCTGGATCCTTC  
SRR448686.106701110.2+ ATCTCCTCTGAGGCTTTTACCACCTTCTGGACCTTCC  
SRR448686.51187136.1+ ATCTCCTCTGATGCTTTTCCCCACCTTCTGGATCCTTCC  
SRR448686.23979878.1+ ATCTCCTCTGATGCTTTTCCCCACCTTCTGGATCCTTCCA  
SRR448687.86864824.1- ATCTCCTCTGATGCTTTTCCCCACCTTCTGGATCCTTCCA  
SRR448688.28024589.1- ATCTCCTCTGATGCTTTTCCCCACCTTCTGGATCCTTCCA  
SRR448688.9125292.1- ATCTCCTCTGATGCTTTTCCCCACCTTCTGGATCCTTCCA  
SRR448694.6034041.2- ATCTCCTCTGATGCTTTTCCCCACCTTCTGGATCCTTCCA  
SRR448681.8573045.2- ATCTCCTCTGATGCTTTTCCCCACCTTCTGGATCCTTCCAG  
SRR448687.3343710.2+ ATCTCCTCTGATGCTTTTCCCCACCTTCTGGATCCTTCCAG  
SRR448694.98363864.2+ ATCTCCTCTGATGCTTTTCCCCACCTTCTGGATCCTTCCAG  
SRR448681.7905433.1- ATCTCCTCTGATGCTTTTCCCCACCTTCTGGATCCTTCCAGCA  
SRR448683.7171667.2+ ATCTCCTCTGATGCTTTTCCCCACCTTCTGGATCCTTCCAGCA  
SRR448687.74845974.2+ ATCTCCTCTGATGCTTTTCCCCACCTTCTGGATCCTTCCAGCA  
SRR448683.54936564.2- ATCTCCTCTGATGCTTTTCCCCACCTTCTGGATCCTTCCAGCAT  
SRR448694.29420155.1+ ATCTCCTCTGATGCTTTTCCCCACCTTCTGGATCCTTCCAGCAT  
SRR448675.89618126.1- ATCTCCTCTGATGCTTTTCCCCACCTTCTGGATCCTTCCAGCATG  
SRR448686.45764778.1+ ATCTCCTCTGATGCTTTTCCCCACCTTCTGGATCCTTCCAGCATG  
SRR448686.62615618.2+ ATCTCCTCTGATGCTTTTCCCCACCTTCTGGATCCTTCCAGCATG  
SRR448675.41712885.1+ ATCTCCTCTGATGCTTTTCCCCACCTTCTGGATCCTTCCAGCATGT  
SRR448688.44162718.2+ ATCTCCTCTGATGCTTTTCCCCACCTTCTGGATCCTTCCAGCATGT  
SRR448688.47771318.2+ ATCTCCTCTGATGCTTTTCCCCACCTTCTGGATCCTTCCAGCATGT  
SRR448688.51806068.2+ ATCTCCTCTGATGCTTTTCCCCACCTTCTGGATCCTTCCAGCATGT  
SRR448688.71711909.1+ ATCTCCTCTGATGCTTTTCCCCACCTTCTGGATCCTTCCAGCATGT  
SRR448688.73119745.1+ ATCTCCTCTGATGCTTTTCCCCACCTTCTGGATCCTTCCAGCATGT  
SRR448688.78619446.2+ ATCTCCTCTGATGCTTTTCCCCACCTTCTGGATCCTTCCAGCATGT  
SRR448688.89980412.1+ ATCTCCTCTGATGCTTTTCCCCACCTTCTGGATCCTTCCAGCATGT  
SRR448686.78672064.1+ ATCTCCTCTGATGCTTTTCCCCACCTTCTGGATCCTTCCAGCATGTT  
SRR448681.80676895.2- ATCTCCTCTGATGCTTTTCCCCACCTTCTGGATCCTTCCAGCATGTTCT  
SRR448681.94680159.1- ATCTCCTCTGATGCTTTTCCCCACCTTCTGGATCCTTCCAGCATGTTCTAC  
SRR448687.11814241.1- ATCTCCTCTGATGCTTTTCCCCACCTTCTGGATCCTTCCAGCATGTTCTAC  
SRR448683.7145084.1+ ATCTCCTCTGATGCTTTTCCCCACCTTCTGGATCCTTCCAGCATGTTCTACCT  
SRR448683.8612468.1+ ATCTCCTCTGATGCTTTTCCCCACCTTCTGGATCCTTCCAGCATGTTCTACCT  
SRR448683.28756459.1+ ATCTCCTCTGATGCTTTTCCCCACCTTCTGGATCCTTCCAGCATGTTCTACCT  
SRR448681.58636992.1+ ATCTCCTCTGATGCTTTTCCCCACCTTCTGGATCCTTCCAGCATGTTCTACCTC  
SRR448687.46257036.1+ ATCTCCTCTGATGCTTTTCCCCACCTTCTGGATCCTTCCAGCATGTTCTACCTC  
SRR448681.69796216.1+ ATCTCCTCTGATGCTTTTCCCCACCTTCTGGATCCTTCCAGCATGTTCTACCTCT  
SRR448686.109816047.1+ ATCTCCTCTGATGCTTTTCCCCACCTTCTGGATCCTTCCAGCATGTTCTACCTCTG  
SRR448686.67616577.2+ ATCTCCTCTGATGCTTTTCCCCACCTTCTGGATCCTTCCAGCATGTTCTACCTCTGCG  
SRR448681.18143961.1+ ATCTCCTCTGATGCTTTTCCCCACCTTCTGGATCCTTCCAGCATGTTCTACCTCTGCT  
SRR448686.43492870.2+ ATCTCCTCTGATGCTTTTCCCCACCTTCTGGATCCTTCCAGCATGTTCTACCTCTGCT  
SRR448687.46659143.2- ATCTCCTCTGATGCTTTTCCCCACCTTCTGGATCCTTCCAGCATGTTCTACCTCTGCT  
SRR448675.104363339.1+ ATCTCCTCTGATGCTTTTCCCCACCTTCTGGATCCTTCCAGCATGTTCTACCTCTGCTG  
SRR448675.24488131.2- ATCTCCTCTGATGCTTTTCCCCACCTTCTGGATCCTTCCAGCATGTTCTACCTCTGCTG  
SRR448675.24551560.2- ATCTCCTCTGATGCTTTTCCCCACCTTCTGGATCCTTCCAGCATGTTCTACCTCTGCTG  
SRR448675.24700540.1+ ATCTCCTCTGATGCTTTTCCCCACCTTCTGGATCCTTCCAGCATGTTCTACCTCTGCTG  
SRR448675.24783207.2+ ATCTCCTCTGATGCTTTTCCCCACCTTCTGGATCCTTCCAGCATGTTCTACCTCTGCTG  
SRR448675.26176825.1+ ATCTCCTCTGATGCTTTTCCCCACCTTCTGGATCCTTCCAGCATGTTCTACCTCTGCTG  
SRR448675.26299051.1- ATCTCCTCTGATGCTTTTCCCCACCTTCTGGATCCTTCCAGCATGTTCTACCTCTGCTG  
SRR448675.34371245.1+ ATCTCCTCTGATGCTTTTCCCCACCTTCTGGATCCTTCCAGCATGTTCTACCTCTGCTG  
SRR448675.3711092.1+ ATCTCCTCTGATGCTTTTCCCCACCTTCTGGATCCTTCCAGCATGTTCTACCTCTGCTG  
SRR448675.37623604.1- ATCTCCTCTGATGCTTTTCCCCACCTTCTGGATCCTTCCAGCATGTTCTACCTCTGCTG  
SRR448675.54641135.1- ATCTCCTCTGATGCTTTTCCCCACCTTCTGGATCCTTCCAGCATGTTCTACCTCTGCTG  
SRR448675.59564553.1+ ATCTCCTCTGATGCTTTTCCCCACCTTCTGGATCCTTCCAGCATGTTCTACCTCTGCTG  
SRR448675.76497237.2+ ATCTCCTCTGATGCTTTTCCCCACCTTCTGGATCCTTCCAGCATGTTCTACCTCTGCTG  
SRR448675.81560484.2+ ATCTCCTCTGATGCTTTTCCCCACCTTCTGGATCCTTCCAGCATGTTCTACCTCTGCTG  
SRR448675.82235779.2- ATCTCCTCTGATGCTTTTCCCCACCTTCTGGATCCTTCCAGCATGTTCTACCTCTGCTG  
SRR448681.12918655.2- ATCTCCTCTGATGCTTTTCCCCACCTTCTGGATCCTTCCAGCATGTTCTACCTCTGCTG  
SRR448681.22542882.1- ATCTCCTCTGATGCTTTTCCCCACCTTCTGGATCCTTCCAGCATGTTCTACCTCTGCTG  
SRR448681.47301511.1+ ATCTCCTCTGATGCTTTTCCCCACCTTCTGGATCCTTCCAGCATGTTCTACCTCTGCTG  
SRR448681.86267206.2+ ATCTCCTCTGATGCTTTTCCCCACCTTCTGGATCCTTCCAGCATGTTCTACCTCTGCTG  
SRR448681.9386500.1- ATCTCCTCTGATGCTTTTCCCCACCTTCTGGATCCTTCCAGCATGTTCTACCTCTGCTG  
SRR448683.13133273.1+ ATCTCCTCTGATGCTTTTCCCCACCTTCTGGATCCTTCCAGCATGTTCTACCTCTGCTG  
SRR448683.16399903.2- ATCTCCTCTGATGCTTTTCCCCACCTTCTGGATCCTTCCAGCATGTTCTACCTCTGCTG  
SRR448683.58306359.1+ ATCTCCTCTGATGCTTTTCCCCACCTTCTGGATCCTTCCAGCATGTTCTACCTCTGCTG  
SRR448686.1056904.2+ ATCTCCTCTGATGCTTTTCCCCACCTTCTGGATCCTTCCAGCATGTTCTACCTCTGCTG  
SRR448686.111978264.2- ATCTCCTCTGATGCTTTTCCCCACCTTCTGGATCCTTCCAGCATGTTCTACCTCTGCTG  
SRR448686.114576736.2+ ATCTCCTCTGATGCTTTTCCCCACCTTCTGGATCCTTCCAGCATGTTCTACCTCTGCTG  
SRR448686.16841256.2+ ATCTCCTCTGATGCTTTTCCCCACCTTCTGGATCCTTCCAGCATGTTCTACCTCTGCTG  
SRR448686.24823209.1+ ATCTCCTCTGATGCTTTTCCCCACCTTCTGGATCCTTCCAGCATGTTCTACCTCTGCTG  
SRR448686.35001025.1+ ATCTCCTCTGATGCTTTTCCCCACCTTCTGGATCCTTCCAGCATGTTCTACCTCTGCTG  
SRR448686.4636378.1+ ATCTCCTCTGATGCTTTTCCCCACCTTCTGGATCCTTCCAGCATGTTCTACCTCTGCTG  
SRR448686.77809999.2- ATCTCCTCTGATGCTTTTCCCCACCTTCTGGATCCTTCCAGCATGTTCTACCTCTGCTG  
SRR448686.78011325.2- ATCTCCTCTGATGCTTTTCCCCACCTTCTGGATCCTTCCAGCATGTTCTACCTCTGCTG  
SRR448686.81987744.1+ ATCTCCTCTGATGCTTTTCCCCACCTTCTGGATCCTTCCAGCATGTTCTACCTCTGCTG  
SRR448686.90650419.2+ ATCTCCTCTGATGCTTTTCCCCACCTTCTGGATCCTTCCAGCATGTTCTACCTCTGCTG  
SRR448687.32853383.2+ ATCTCCTCTGATGCTTTTCCCCACCTTCTGGATCCTTCCAGCATGTTCTACCTCTGCTG  
SRR448687.40049376.1- ATCTCCTCTGATGCTTTTCCCCACCTTCTGGATCCTTCCAGCATGTTCTACCTCTGCTG  
SRR448687.4804306.2+ ATCTCCTCTGATGCTTTTCCCCACCTTCTGGATCCTTCCAGCATGTTCTACCTCTGCTG  
SRR448687.52280250.1+ ATCTCCTCTGATGCTTTTCCCCACCTTCTGGATCCTTCCAGCATGTTCTACCTCTGCTG  
SRR448687.57896852.1+ ATCTCCTCTGATGCTTTTCCCCACCTTCTGGATCCTTCCAGCATGTTCTACCTCTGCTG  
SRR448687.58131717.1- ATCTCCTCTGATGCTTTTCCCCACCTTCTGGATCCTTCCAGCATGTTCTACCTCTGCTG  
SRR448687.737468.2+ ATCTCCTCTGATGCTTTTCCCCACCTTCTGGATCCTTCCAGCATGTTCTACCTCTGCTG  
SRR448687.96116175.2+ ATCTCCTCTGATGCTTTTCCCCACCTTCTGGATCCTTCCAGCATGTTCTACCTCTGTTG

SRR448687.88915780.1+ TCTCCTGATGCTTTTCCCCACCTTCCTGGATCCTTCCAGCATGTTCTACCTCTGCTG  
SRR448690.33179760.1+ CTCTCTGATGCTTTTCCCCACCTTCCTGGATCCTTCCAGCATGTTCTA  
SRR448690.4517109.1+ CTCCTGATGCTTTTCCCCACCTTCCTGGATCCTTCCAGCATGTTCTA  
SRR448690.55728553.1+ CTCTCTGATGCTTTTCCCCACCTTCCTGGATCCTTCCAGCATGTTCTA  
SRR448690.82753351.1+ CTCCTCTGATGCTTTTCCCCACCTTCCTGGATCCTTCCAGCATGTTCTA  
SRR448699.60328335.2+ CTCTCTGATGCTTTTCCCCACCTTCCTGGATCCTTCCAGCATGTTCTA  
SRR448699.60338778.2- SRR448699.60338778.2- CTCCTGATGCTTTTCCCCACCTTCCTGGATCCTTCCAGCATGTTCTA  
SRR448699.79010841.2+ CTCTCTGATGCTTTTCCCCACCTTCCTGGATCCTTCCAGCATGTTCTA  
SRR448683.4919531.2+ CTCCTCTGATGCTTTTCCCCACCTTCCTGGATCCTTCCAGCATGTTCTACCTCTGCTG  
SRR448683.90888613.2+ CTCCTCTGATGCTTTTCCCCACCTTCCTGGATCCTTCCAGCATGTTCTACCTCTGCTG  
SRR448687.55340056.2- TCCTCTGATGCTTTTCCCCACCTTCCTGGATCCTTCCAGCATGTTCTACCTCTGCTG  
SRR448694.35914305.1- CTGATGCTTTTCCCCACCTTCCTGGATCCTTCCAGCATGTTCTACCTCT  
SRR448694.5122634.1- CTGATGCTTTTCCCCACCTTCCTGGATCCTTCCAGCATGTTCTACCTCT  
SRR448699.50118699.1- CTGATGCTTTTCCCCACCTTCCTGGATCCTTCCAGCATGTTCTACCTCT  
SRR448699.60282870.1- CTGATGCTTTTCCCCACCTTCCTGGATCCTTCCAGCATGTTCTACCTCT  
SRR448675.92739025.2+ CTGATGCTTTTCCCCACCTTCCTGGATCCTTCCAGCATGTTCTACCTCTGCTG  
SRR448683.53372918.2- CTGATGCTTTTCCGACCTTCCTGGATCCTTCCAGCATGTTCTACCTCTGCTG  
SRR448686.20664457.2+ CTGATGCTTTTCCCCACCTTCCTGGATCCTTCCAGCATGTTCTACCTCTGCTG  
SRR448681.7497961.1+ TGATGCTTTTCCCCACCTTCCTGGATCCTTCCAGCATGTTCTACCTCTGCTG  
SRR448686.83118909.2+ CTTTTCCCCACCTTCCTGGATCCTTCCAGCATGTTCTACCTCTGCTG  
SRR448702.50912846.1+ CTTTTCCCCACCTTCCTGGATCCTTCCAGCATGTTCTACCTCTGCTG  
SRR448694.36209705.2+ TTTTCCCCACCTTCCTGGATCCTTCCAGCATGTTCTACCTCTGCTG  
SRR448688.60587352.2- TTTCCCCACCTTCCTGGATCCTTCCAGCATGTTCTACCTCTGCTG  
SRR448688.83480597.2- TTTCCCCACCTTCCTGGATCCTTCCAGCATGTTCTACCTCTGCTG  
SRR448694.89521764.1- TTCCCCACCTTCCTGGATCCTTCCAGCATGTTCTACCTCTGCTG  
SRR448681.69796216.2- TCCCCACCTTCCTGGATCCTTCCAGCATGTTCTACCTCTGCTG  
SRR448681.88931306.2- TCCCCCCTTCCTGGATCCTTCCAGCATGTTCTACCTCTGCTG  
SRR448686.86029142.1- CCCCACCTTCCTGGATCCTTCCAGCATGTTCTACCTCTGCTG  
SRR448683.59297888.2+ CCCACCTTCCTGGATCCTTCCAGCATGTTCTACCTCTGCTG  
SRR448702.56722010.2+ CCACCTTCCTGGATCCTTCCAGCATGTTCTACCTCTGCTG  
SRR448699.57717956.1- ACCTTCCTGGATCCTTCCAGCATGTTCTACCTCTGCTG  
SRR448699.97721361.1- ACCTTCCTGGATCCTTCCAGCATGTTCTACCTCTGCTG  
SRR448690.1725560.1- CCTTCCTGGATCCTTCCAGCATGTTCTACCTCTGCTG  
SRR448690.68594978.1- CCTTCCTGGATCCTTCCAGCATGTTCTACCTCTGCTG  
SRR448690.69634400.1- CCTTCCTGGATCCTTCCAGCATGTTCTACCTCTGCTG  
SRR448687.994456.2+ CTTTCCTGGATCCTTCCAGCATGTTCTACCTCTGCTG  
SRR448675.41712885.2- TTCTGGATCCTTCCAGCATGTTCTACCTCTGCTG  
SRR448683.45914950.1- TTCTGGATCCTTCCAGCATGTTCTACCTCTGCTG  
SRR448694.92755853.2+ TTCTGGATCCTTCCAGCATGTTCTACCTCTGCTG  
SRR448699.41278410.2- TTCTGGATCCTTCCAGCATGTTCTACCTCTGCTG  
SRR448699.4367997.1- TCCTGGATCCTTCCAGCATGTTCTACCTCTGCTG  
SRR448688.75840989.2+ TCCTGGATCCTTCCAGCATGTTCTACCTCTGCTG  
SRR448699.101976960.2+ CCTGGATCCTTCCAGCATGTTCTACCTCTGCTG  
SRR448681.58636992.2- CCTGGATCCTTCCAGCATGTTCTACCTCTGCTG  
SRR448686.34129339.2+ TGGATCCTTCCAGCATGTTCTACCTCTGCTG  
SRR448681.34420081.1+ TGGATCCTTCCAGCATGTTCTACCTCTGCTG  
SRR448699.102129511.2- TGGATCCTTCCAGCATGTTCTACCTCTGCTG  
SRR448699.26262351.2- GGATCCTTCCAGCATGTTCTACCTCTGCTG  
SRR448686.99783446.1- GGATCCTTCCAGCATGTTCTACCTCTGCTG  
SRR448705.2172827.1- GGATCCTTCCAGCATGTTCTACCTCTGCTG  
SRR448705.22697971.1- GGATCCTTCCAGCATGTTCTACCTCTGCTG  
SRR448705.24783751.1- GGATCCTTCCAGCATGTTCTACCTCTGCTG  
SRR448705.35110401.1- GGATCCTTCCAGCATGTTCTACCTCTGCTG  
SRR448705.41751292.1- GGATCCTTCCAGCATGTTCTACCTCTGCTG  
SRR448705.43820714.1- GGATCCTTCCAGCATGTTCTACCTCTGCTG  
SRR448705.62173839.1- GGATCCTTCCAGCATGTTCTACCTCTGCTG  
SRR448705.73492024.1- GGATCCTTCCAGCATGTTCTACCTCTGCTG  
SRR448705.76600513.1- GGATCCTTCCAGCATGTTCTACCTCTGCTG  
SRR448705.78624254.1- GGATCCTTCCAGCATGTTCTACCTCTGCTG  
SRR448705.88689082.1- GGATCCTTCCAGCATGTTCTACCTCTGCTG  
SRR448690.19251526.1- ATCCTTCCAGCATGTTCTACCTCTGCTG  
SRR448690.35177987.1- ATCCTTCCAGCATGTTCTACCTCTGCTG  
SRR448690.8793826.1- ATCCTTCCAGCATGTTCTACCTCTGCTG  
SRR448694.88915619.1+ ATCCTTCCAGCATGTTCTACCTCTGCTG  
SRR448681.86267206.1- CCTTCCAGCATGTTCTACCTCTGCTG  
SRR448687.65214307.1+ CCTTCCAGCATGTTCTACCTCTGCTG  
SRR448683.14290636.1- CTTCAGCATGTTCTACCTCTGCTG  
SRR448686.46585949.2- CTTCCAGCATGTTCTACCTCTGCTG  
SRR448687.62503016.1+ CTTCCAGCATGTTCTACCTCTGCTG  
SRR448705.94463881.2+ CTTCCAGCATGTTCTACCTCTGCTG  
SRR448681.47301511.2- TTCCAGCATGTTCTACCTCTGCTG  
SRR448690.100388792.1+ TTCCAGCATGTTCTACCTCTGCTG  
SRR448690.91289910.1+ TTCCAGCATGTTCTACCTCTGCTG  
SRR448699.10605196.1+ TTCCAGCATGTTCTACCTCTGCTG  
SRR448675.104128282.1+ TCCAGCATGTTCTACCTCTGCTG  
SRR448675.24700540.2- TCCAGCATGTTCTACCTCTGCTG  
SRR448688.23026856.2+ TCCAGCATGTTCTACCTCTGCTG  
SRR448688.26519151.1+ TCCAGCATGTTCTACCTCTGCTG  
SRR448688.4725251.1+ TCCAGCATGTTCTACCTCTGCTG  
SRR448688.75228225.1+ TCCAGCATGTTCTACCTCTGCTG  
SRR448688.85519119.1+ TCCAGCATGTTCTACCTCTGCTG  
SRR448688.9307577.1+ TCCAGCATGTTCTACCTCTGCTG  
SRR448675.26176825.2- CCAGCATGTTCTACCTCTGCTG  
SRR448687.71782978.2+ CCAGCATGTTCTACCTCTGCTG



SRR448699.28603845.1+  
SRR448681.50099907.1+  
SRR448687.89910530.2+  
SRR448683.19193053.2-  
SRR448675.3711092.2-  
SRR448681.18143961.2-  
SRR448688.623745.1+  
SRR448690.59500894.1-  
SRR448690.82179856.1-  
SRR448699.51426342.2-  
SRR448687.59753368.2+  
SRR448683.91457999.2-  
SRR448699.74102933.2+  
SRR448683.53184158.2-  
SRR448694.13441487.2-  
SRR448687.10881609.1+  
SRR448687.88021195.1+  
SRR448694.2375465.1-  
SRR448675.76497237.1-  
SRR448681.68030745.1+  
SRR448681.21545235.2+  
SRR448690.52257033.2+  
SRR448687.42732058.1-  
SRR448687.47390517.2+  
SRR448699.47956681.2+  
SRR448675.34371245.2-  
SRR448681.32854092.1+  
SRR448681.3793565.1+  
SRR448681.7337942.2+  
SRR448694.19498543.1-  
SRR448687.6574725.1-  
SRR448694.5989384.1+  
SRR448694.71735553.1+  
SRR448694.92596162.1+  
SRR448686.24956981.2-  
SRR448688.25191493.1-  
SRR448688.28589525.1-  
SRR448688.32670682.1-

consensus

CCAGCATGTTCTACCTCTGCTG  
CAGCATGTTCTACCTCTGCTG  
CAGCATGTTCTACCTCTGCTG  
AGCATGTTCTACCTCTGCTG  
GCATGTTCTACCTCTGCTG  
GCATGTTCTACCTCTGCTG  
GCATGTTCTACCTCTGCTG  
GCATGTTCTACCTCTGCTG  
GCATGTTCTACCTCTGCTG  
GCATGTTCTACCTCTGCTG  
CATGTTCTACCTCTGCTG  
ATGTTCTACCTCTGCTG  
TGTTCTACCTCTGCTG  
GTTCTACCTCTGCTG  
GTTCTACCTCTGCTG  
TTCTACCTCTGCTG  
TTCTACCTCTGCTG  
TTCTACCTCTGCTG  
TACCTCTGCTG  
TACCTCTGCTG  
ACCTCTGCTG  
ACCTCTGCTG  
CCTCTGCTG  
CCTCTGCTG  
CCTCTGCTG  
CTCTGCTG  
CTGCTG  
TGCTG  
TGCTG  
GCTG  
CTG  
TG  
TG  
TG  
G  
G  
G  
G

ATCTCCTCTGATGCTTTTCCCCACCTTCTGGATCCTTCCAGCATGTTCTACCTCTGCTG

. : . : . : . : . : . :

SRR448681.47301511.1+  
SRR448686.114576736.2+  
SRR448702.50912846.1+  
SRR448686.4636378.1+  
SRR448694.36209705.2+  
SRR448681.86267206.2+  
SRR448688.60587352.2-  
SRR448688.83480597.2-  
SRR448694.89521764.1-  
SRR448675.24488131.2-  
SRR448687.32853383.2+  
SRR448675.26299051.1-  
SRR448687.52280250.1+  
SRR448702.56722010.2+  
SRR448675.24700540.1+  
SRR448681.12918655.2-  
SRR448681.22542882.1-  
SRR448686.77809999.2-  
SRR448675.76497237.2+  
SRR448699.57717956.1-  
SRR448699.97721361.1-  
SRR448675.3711092.1+  
SRR448686.16841256.2+  
SRR448690.1725560.1-  
SRR448690.68594978.1-  
SRR448690.69634400.1-  
SRR448683.16399903.2-  
SRR448686.24823209.1+  
SRR448694.92755853.2+  
SRR448699.41278410.2-  
SRR448699.4367997.1-  
SRR448675.54641135.1-  
SRR448688.75840989.2+  
SRR448699.101976960.2+  
SRR448687.737468.2+  
SRR448675.34371245.1+  
SRR448699.102129511.2-  
SRR448699.26262351.2-  
SRR448705.2172827.1-  
SRR448705.22697971.1-  
SRR448705.24783751.1-  
SRR448705.35110401.1-

GG  
GG  
GG  
GGA  
GGA  
GGAG  
GGAG  
GGAG  
GGAGC  
GGAGCAC  
GGAGCAC  
GGAGCACA  
GGAGCACA  
GGAGCACAAG  
GGAGCACAAG  
GGAGCACAAG  
GGAGCACAAGG  
GGAGCACAAGG  
GGAGCACAAGG  
GGAGCACAAGGA  
GGAGCACAAGGA  
GGAGCACAAGGA  
GGAGCACAAGGA  
GGAGCACAAGGA  
GGAGCACAAGGAAC  
GGAGCACAAGGAAC  
GGAGCACAAGGAAC  
GGAGCACAAGGAAC  
GGAGCACAAGGAACA  
GGAGCACAAGGAACA  
GGAGCACAAGGAACAG  
GGAGCACAAGGAACAGG  
GGAGCACAAGGAACAGGA  
GGAGCACAAGGAACAGGAG  
GGAGCACAAGGAACAGGAG  
GGAGCACAAGGAACAGGAG  
GGAGCACAAGGAACAGGAG

SRR448705.41751292.1- GGAGCACAAGGAACAGGAG  
SRR448705.43820714.1- GGAGCACAAGGAACAGGAG  
SRR448705.62173839.1- GGAGCACAAGGAACAGGAG  
SRR448705.73492024.1- GGAGCACAAGGAACAGGAG  
SRR448705.76600513.1- GGAGCACAAGGAACAGGAG  
SRR448705.78624254.1- GGAGCACAAGGAACAGGAG  
SRR448705.88689082.1- GGAGCACAAGGAACAGGAG  
SRR448675.26176825.1+ GGAGCACAAGGAACAGGAGC  
SRR448690.19251526.1- GGAGCACAAGGAACAGGAGCT  
SRR448690.35177987.1- GGAGCACAAGGAACAGGAGCT  
SRR448690.8793826.1- GGAGCACAAGGAACAGGAGCT  
SRR448694.88915619.1+ GGAGCACAAGGAACAGGAGCT  
SRR448705.94463881.2+ GGAGCACAAGGAACAGGAGCTGAT  
SRR448675.37623604.1- GGAGCACAAGGAACAGGAGCTGATG  
SRR448681.9386500.1- GGAGCACAAGGAACAGGAGCTGATG  
SRR448690.100388792.1+ GGAGCACAAGGAACAGGAGCTGATG  
SRR448690.91289910.1+ GGAGCACAAGGAACAGGAGCTGATG  
SRR448699.10605196.1+ GGAGCACAAGGAACAGGAGCTGATG  
SRR448687.96116175.2+ GGAGCACAAGGAACAGGAGCTGATGG  
SRR448688.23026856.2+ GGAGCACAAGGAACAGGAGCTGATGG  
SRR448688.26519151.1+ GGAGCACAAGGAACAGGAGCTGATGG  
SRR448688.4725251.1+ GGAGCACAAGGAACAGGAGCTGATGG  
SRR448688.75228225.1+ GGAGCACAAGGAACAGGAGCTGATGG  
SRR448688.85519119.1+ GGAGCACAAGGAACAGGAGCTGATGG  
SRR448688.9307577.1+ GGAGCACAAGGAACAGGAGCTGATGG  
SRR448687.40049376.1- GGAGCACAAGGAACAGGAGCTGATGGG  
SRR448699.28603845.1+ GGAGCACAAGGAACAGGAGCTGATGGG  
SRR448686.90650419.2+ GGAGCACAAGGAACAGGAGCTGATGGGG  
SRR448686.111978264.2- GGAGCACAAGGAACAGGAGCTGATGGGGT  
SRR448687.4804306.2+ GGAGCACAAGGAACAGGAGCTGATGGGGT  
SRR448688.623745.1+ GGAGCACAAGGAACAGGAGCTGATGGGGTT  
SRR448690.59500894.1- GGAGCACAAGGAACAGGAGCTGATGGGGTT  
SRR448690.82179856.1- GGAGCACAAGGAACAGGAGCTGATGGGGTT  
SRR448699.51426342.2- GGAGCACAAGGAACAGGAGCTGATGGGGTT  
SRR448683.58306359.1+ GGAGCACAAGGAACAGGAGCTGATGGGGTTGA  
SRR448687.57896852.1+ GGAGCACAAGGTACAGGAGCTGATGGGGTTGA  
SRR448687.58131717.1- GGAGCACAAGGAACAGGAGCTGATGGGGTTGA  
SRR448699.74102933.2+ GGAGCACAAGGAACAGGAGCTGATGGGGTTGAG  
SRR448694.13441487.2- GGAGCACAAGGAACAGGAGCTGATGGGGTTGAGC  
SRR448675.24551560.2- GGAGCACAAGGAACAGGAGCTGATGGGGTTGAGCT  
SRR448675.82235779.2- GGAGCACAAGGAACAGGAGCTGATGGGGTTGAGCT  
SRR448694.2375465.1- GGAGCACAAGGAACAGGAGCTGATGGGGTTGAGCT  
SRR448675.59564553.1+ GGAGCACAAGGAACAGGAGCTGATGGGGTTGAGCTG  
SRR448675.81560484.2+ GGAGCACAAGGAACAGGAGCTGATGGGGTTGAGCTG  
SRR448683.13133273.1+ GGAGCACAAGGAACAGGAGCTGATGGGGTTGAGCTGC  
SRR448686.35001025.1+ GGAGCACAAGGAACAGGAGCTGATGGGGTTGAGCTGC  
SRR448686.78011325.2- GGAGCACAAGGAACAGGAGCTGATGGGGTTGAGCTGCA  
SRR448690.52257033.2+ GGAGCACAAGGAACAGGAGCTGATGGGGTTGAGCTGCAC  
SRR448675.104363339.1+ GGAGCACAAGGAACAGGAGCTGATGGGGTTGAGCTGCACA  
SRR448675.24783207.2+ GGAGCACAAGGAACAGGAGCTGATGGGGTTGAGCTGCACA  
SRR448686.1056904.2+ GGAGCACAAGGAACAGGAGCTGATGGGGTTGAGCTGCACA  
SRR448699.47956681.2+ GGAGCACAAGGAACAGGAGCTGATGGGGTTGAGCTGCACA  
SRR448683.90888613.2+ GGAGCACAAGGAACAGGAGCTGATGGGGTTGAGCTGCACAT  
SRR448687.88915780.1+ GGAGCACAAGGAACAGGAGCTGATGGGGTTGAGCTGCACAT  
SRR448683.4919531.2+ GGAGCACAAGGAACAGGAGCTGATGGGGTTGAGCTGCACATC  
SRR448687.55340056.2- GGAGCACAAGGAACAGGAGCTGATGGGGTTGAGCTGCACATCC  
SRR448683.53372918.2- GGAGCACAAGGAACAGGAGCTGATGGGGTTGAGCTGCACATCCA  
SRR448694.19498543.1- GGAGCACAAGGAACAGGAGCTGATGGGGTTGAGCTGCACATCCAC  
SRR448675.92739025.2+ GGAGCACAAGGAACAGGAGCTGATGGGGTTGAGCTGCACATCCACAC  
SRR448686.20664457.2+ GGAGCACAAGGAACAGGAGCTGATGGGGTTGAGCTGCACATCCACAC  
SRR448694.5989384.1+ GGAGCACAAGGAACAGGAGCTGATGGGGTTGAGCTGCACATCCACAC  
SRR448694.71735553.1+ GGAGCACAAGGAACAGGAGCTGATGGGGTTGAGCTGCACATCCACAC  
SRR448694.92596162.1+ GGAGCACAAGGAACAGGAGCTGATGGGGTTGAGCTGCACATCCACAC  
SRR448681.7497961.1+ GGAGCACAAGGAACAGGAGCTGATGGGGTTGAGCTGCACATCCACACT  
SRR448688.25191493.1- GGAGCACAAGGAACAGGAGCTGATGGGGTTGAGCTGCACATCCACACT  
SRR448688.28589525.1- GGAGCACAAGGAACAGGAGCTGATGGGGTTGAGCTGCACATCCACACT  
SRR448688.32670682.1- GGAGCACAAGGAACAGGAGCTGATGGGGTTGAGCTGCACATCCACACT  
SRR448694.76767889.1+ GGAGCACAAGGAACAGGAGCTGATGGGGTTGAGCTGCACATCCACACTG  
SRR448686.83118909.2+ GGAGCACAAGGAACAGGAGCTGATGGGGTTGAGCTGCACATCCACACTGGGTG  
SRR448681.69796216.2- GGAGCACAAGGAACAGGAGCTGATGGGGTTGAGCTGCACATCCACACTGGGTGGATG  
SRR448681.88931306.2- GGAGCACAAGGAACAGGAGCTGATGGGGTTGAGCTGCACATCCACACTGGGTGGATG  
SRR448686.86029142.1- GGAGCACAAGGAACAGGAGCTGATGGGGTTGAGCTGCACATCCACACTGGGTGGATGG  
SRR448683.59297888.2+ GGAGCACAAGGAACAGGAGCTGATGGGGTTGAGCTGCACATCCACACTGGGTGGATGGC  
SRR448675.104128282.1+ GGATCACAAGGAACAGGAGCTGATGGGGTTGAGCTGCACATCCACACTGGGTGGATGGCA  
SRR448675.24700540.2- GGAGCACAAGGAACAGGAGCTGATGGGGTTGAGCTGCACATCCACACTGGGTGGATGGCA  
SRR448675.26176825.2- GGAGCACAAGGAACAGGAGCTGATGGGGTTGAGCTGCACATCCACACTGGGTGGATGGCA  
SRR448675.34371245.2- GGAGCACAAGGAACAGGAGCTGATGGGGTTGAGCTGCACATCCACACTGGGTGGATGGCA  
SRR448675.3711092.2- GGAGCACAAGGAACAGGAGCTGATGGGGTTGAGCTGCACATCCACACTGGGTGGATGGCA  
SRR448675.41712885.2- GGAGCACAAGGAACAGGAGCTGATGGGGTTGAGCTGCACATCCACACTGGGTGGATGGCA  
SRR448675.76497237.1- GGAGCACAAGGAACAGGAGCTGATGGGGTTGAGCTGCACATCCACACTGGGTGGATGGCA  
SRR448681.18143961.2- GGAGCACAAGGAACAGGAGCTGATGGGGTTGAGCTGCACATCCACACTGGGTGGATGGCA  
SRR448681.21545235.2+ GGAGCACAAGGAACAGGAGCTGATGGGGTTGAGCTGCACATCCACACTGGGTGGATGGCA  
SRR448681.32854092.1+ GGAGCACAAGGAACAGGAGCTGATGGGGTTGAGCTGCACATCCACACTGGGTGGATGGCA  
SRR448681.34420081.1+ GGAGCACAAGGAACAGGAGCTGATGGGGTTGAGCTGCACATCCACACTGTGTGGATGGCA

SRR448681.3793565.1+ GGAGCACAAGGAACAGGAGCTGATGGGGTTGAGCTGCACATCCACACTGGGTGGATGGCA  
SRR448681.47301511.2- GGAGCACAAGGAACAGGAGCTGATGGGGTTGAGCTGCACATCCACACTGGGTGGATGGCA  
SRR448681.50099907.1+ GGAGCACAAGGAACAGGAGCTGATGGGGTTGAGCTGCACATCCACACTGGGTGGATGGCA  
SRR448681.58636992.2- GGAGCACAAGGAACAGGAGCTGATGGGGTTGAGCTGCACATCCACACTGGGTGGATGGCA  
SRR448681.68030745.1+ GGAGCACAAGGAACAGGAGCTGATGGGGTTGAGCTGCACATCCACACTGGGTGGATGGCA  
SRR448681.7337942.2+ GGAGCACAAGGAACAGGAGCTGATGGGGTTGAGCTGCACATCCACACTGGGTGGATGGCA  
SRR448681.86267206.1- GGAGCACAAGGAACAGGAGCTGATGGGGTTGAGCTGCACATCCACACTGGGTGGATGGCA  
SRR448683.14290636.1- GGAGCACAAGGAACAGGAGCTGATGGGGTTGAGCTGCACATCCACACTGGGTGGATGGCA  
SRR448683.19193053.2- GGAGCACAAGGAACAGGAGCTGATGGGGTTGAGCTGCACATCCACACTGGGTGGATGGCA  
SRR448683.45914950.1- GGAGCACAAGGAACAGGAGCTGATGGGGTTGAGCTGCACATCCACACTGGGTGGATGGCA  
SRR448683.53184158.2- GGAGCACAAGGAACAGGAGCTGATGGGGTTGAGCTGCACATCCACACTGGGTGGATGGCA  
SRR448683.91457999.2- GGAGCACAAGGAACAGGAGCTGATGGGGTTGAGCTGCACATCCACACTGGGTGGATGGCA  
SRR448686.24956981.2- GGAGCACAAGGACCAGGAGCTGATGGGGTTGAGCTGCACATCCACACTGGGTGGATGGCA  
SRR448686.25320476.1- GGAGCACAAGGAACAGGAGCTGATGGGGTTGAGCTGCACATCCACACTGGGTGGATGGCA  
SRR448686.34129339.2+ GGAGCACAAGGAACAGGAGCTGATGGGGTTGAGCTGCACATCCACACTGGGTGGATGGCA  
SRR448686.46585949.2- GGAGCACAAGGAACAGGAGCTGATGGGGTTGAGCTGCACATCCACACTGGGTGGATGGCA  
SRR448686.99783446.1- GGAGCACAAGGAACAGGAGCTGATGGGGTTGAGCTGCACATCCACACTGGGTGGATGGCA  
SRR448687.10881609.1+ GGAGCACAAGGAACAGGAGCTGATGGGGTTGAGCTGCACATCCACACTGGGTGGATGGCA  
SRR448687.42732058.1+ GGAGCACAAGGAACAGGAGCTGATGGGGTTGAGCTGCACATCCACACTGGGTGGATGGCA  
SRR448687.47390517.2+ GGAGCACAAGGAACAGGAGCTGATGGGGTTGAGCTGCACATCCACACTGGGTGGATGGCA  
SRR448687.59753368.2+ GGAGCACAAGGAACAGGAGCTGATGGGGTTGAGCTGCACATCCACACTGGGTGGATGGCA  
SRR448687.62503016.1+ GGAGCACAAGGAACAGGAGCTGATGGGGTTGAGCTGCACATCCACACTGGGTGGATGGCA  
SRR448687.65214307.1+ GGAGCACAAGGAACAGGAGCTGATGGGGTTGAGCTGCACATCCACACTGGGTGGATGGCA  
SRR448687.6574725.1- GGAGCACAAGGAACAGGAGCTGATGGGGTTGAGCTGCACATCCACACTGGGTGGATGGCA  
SRR448687.71782978.2+ GGAGCACAAGGAACAGGAGCTGATGGGGTTGAGCTGCACATCCACACTGGGTGGATGGCA  
SRR448687.88021195.1+ GGAGCACAAGGAACAGGAGCTGATGGGGTTGAGCTGCACATCCACACTGGGTGGATGGCA  
SRR448687.89910530.2+ GGAGCACAAGGAACAGGAGCTGATGGGGTTGAGCTGCACATCCACACTGGGTGGATGGCA  
SRR448687.994456.2+ GGAGCACAAGGAACAGGAGCTGATGGGGTTGAGCTGCACATCCACACTGGGTGGATGGCA  
SRR448688.48262799.2- GAGCACAAGGAACAGGAGCTGATGGGGTTGAGCTGCACATCCACACTGG  
SRR448688.48699444.2- GAGCACAAGGAACAGGAGCTGATGGGGTTGAGCTGCACATCCACACTGG  
SRR448688.7762234.2- GAGCACAAGGAACAGGAGCTGATGGGGTTGAGCTGCACATCCACACTGG  
SRR448699.46619104.2- GAGCACAAGGAACAGGAGCTGATGGGGTTGAGCTGCACATCCACACTGG  
SRR448675.81560484.1- GAGCACAAGGAACAGGAGCTGATGGGGTTGAGCTGCACATCCACACTGGGTGGATGGCA  
SRR448683.5610403.1+ GCACAAGGAACAGGAGCTGATGGGGTTGAGCTGCACATCCACACTGGGTGGATGGCA  
SRR448681.54132602.1+ CACAAGGAACAGGAGCTGATGGGGTTGAGCTGCACATCCACACTGGGTGGATGGCA  
SRR448699.68479777.2+ ACAAGGAACAGGAGCTGATGGGGTTGAGCTGCACATCCACACTGGGTGG  
SRR448699.81987907.2+ ACAAGGAACAGGAGCTGATGGGGTTGAGCTGCACATCCACACTGGGTGG  
SRR448694.104011077.2- CAAGGAACAGGAGCTGATGGGGTTGAGCTGCACATCCACACTGGGTGG  
SRR448694.85217927.2- CAAGGAACAGGAGCTGATGGGGTTGAGCTGCACATCCACACTGGGTGG  
SRR448699.5431226.1+ CAAGGAACAGGAGCTGATGGGGTTGAGCTGCACATCCACACTGGGTGG  
SRR448694.75858924.1+ AAGGAACAGGAGCTGATGGGGTTGAGCTGCACATCCACACTGGGTGGAT  
SRR448683.54546641.2+ AAGGAACAGGAGCTGATGGGGTTGAGCTGCACATCCACACTGGGTGGATGGCA  
SRR448687.72215272.1+ AGGAACAGGAGCTGATGGGGTTGAGCTGCACATCCACACTGGGTGGATGGCA  
SRR448686.95438255.1- GAACAGGAGCTGATGGGGTTGAGCTGCACATCCACACTGGGTGGATGGCA  
SRR448683.90493668.1+ AACAGGAGCTGATGGGGTTGAGCTGCACATCCACACTGGGTGGATGGCA  
SRR448688.77432328.1+ AACAGGAGCTGATGGGGTTGAGCTGCACATCCACACTGGGTGGATGGCA  
SRR448681.21344736.2+ ACAGGAGCTGATGGGGTTGAGCTGCACATCCACACTGGGTGGATGGCA  
SRR448687.61688358.2- ACAGGAGCTGATGGGGTTGAGCTGCACATCCACACTGGGTGGATGGCA  
SRR448683.81894875.1+ AGGAGCTGATGGGGTTGAGCTGCACATCCACACTGGGTGGATGGCA  
SRR448683.37959705.1- GGAGCTGATGGGGTTGAGCTGCACATCCACACTGGGTGGATGGCA  
SRR448675.34322357.2+ AGCTGATGGGGTTGAGCTGCACATCCACACTGGGTGGATGGCA  
SRR448699.110207694.1- GCTGATGGGGTTGAGCTGCACATCCACACTGGGTGGATGGCA  
SRR448675.104363339.2- CTGAGGGGTTGAGCTGCACATCCACACTGGGTGGATGGCA  
SRR448675.24783207.1- CTGATGGGGTTGAGCTGCACATCCACACTGGGTGGATGGCA  
SRR448681.63302088.2+ CTGATGGGGTTGAGCTGCACATCCACACTGGGTGGATGGCA  
SRR448683.16844924.2+ CTGATGGGGTTGAGCTGCACATCCACACTGGGTGGATGGCA  
SRR448694.46724614.2+ CTGATGGGGTTGAGCTGCACATCCACACTGGGTGGATGGCA  
SRR448694.58076743.2- CTGATGGGGTTGAGCTGCACATCCACACTGGGTGGATGGCA  
SRR448694.70323075.2- CTGATGGGGTTGAGCTGCACATCCACACTGGGTGGATGGCA  
SRR448681.82661095.1+ TGATGGGGTTGAGCTGCACATCCACACTGGGTGGATGGCA  
SRR448683.31908163.1- GATGGGGTTGAGCTGCACATCCACACTGGGTGGATGGCA  
SRR448687.39768395.1- GATGGGGTTGAGCTGCACATCCACACTGGGTGGATGGCA  
SRR448675.59564553.2- ATGGGGTTGAGCTGCACATCCACACTGGGTGGATGGCA  
SRR448686.59598963.1- ATGGGGTTGAGCTGCACATCCACACTGGGTGGATGGCA  
SRR448681.73558260.2+ TGGGGTTGAGCTGCACATCCACACTGGGTGGATGGCA  
SRR448681.7497961.2- TGGGGTTGAGCTGCACATCCACACTGGGTGGATGGCA  
SRR448683.56266056.2+ TGGGGTTGAGCTGCACATCCACACTGGGTGGATGGCA  
SRR448683.9537018.2- TGGGGTTGAGCTGCACATCCACACTGGGTGGATGGCA  
SRR448687.31855042.1+ TGGGGTTGAGCTGCACATCCACACTGGGTGGATGGCA  
SRR448699.22573002.2+ GGGGTTGAGCTGCACATCCACACTGGGTGGATGGCA  
SRR448675.92739025.1- GGGTTGAGCTGCACATCCACACTGGGTGGATGGCA  
SRR448675.103252359.1+ GGTGAGCTGCACATCCACACTGGGTGGATGGCA  
SRR448683.42166054.2- GGTGAGCTGCACATCCACACTGGGTGGATGGCA  
SRR448699.12313355.1- GTTGAAGCTGCACATCCACACTGGGTGGATGGCA  
SRR448699.3628409.1- GTTGAAGCTGCACATCCACACTGGGTGGATGGCA  
SRR448687.76742462.2+ TTGAGCTGCACATCCACACTGGGTGGATGGCA  
SRR448683.2954521.2- GAGCGGCACATCCACACTGGGTGGATGGGA  
SRR448686.108023284.1- GAGCTGCACATCCACACTGGGTGGATGGCA  
SRR448687.51419033.1- GAGCTGCACATCCACACTGGGTGGATGGCA  
SRR448699.67140813.2+ GAGCTGCACATCCACACTGGGTGGATGGCA  
SRR448699.68906004.1- GAGCTGCACATCCACACTGGGTGGATGGCA  
SRR448702.16481712.1+ GAGCTGCACATCCACACTGGGTGGATGGCA  
SRR448702.18421897.1+ GAGCTGCACATCCACACTGGGTGGATGGCA  
SRR448702.18996655.1+ GAGCTGCACATCCACACTGGGTGGATGGCA



SRR448687.59753368.2+ TGTGGATT CAGCACTCATGG  
SRR448675.3711092.2- TGTGGATT CAGCCCTCATGGA  
SRR448681.18143961.2- TGTGGATT CAGCCCTCATGGA  
SRR448694.44732468.1- TGTGGATT CAGCCCTCATGGAG  
SRR448683.91457999.2- TGTGGATT CAGCCCTCATGGAGA  
SRR448699.87157854.1- TGTGGATT CAGCCCTCATGGAGA  
SRR448702.56722010.1- TGTGGATT CAGCCCTCATGGAGAG  
SRR448683.53184158.2- TGTGGATT CAGCCCTCATGGAGAGC  
SRR448694.110412111.1- TGTGGATT CAGCCCTCATGGAGAGC  
SRR448694.13924592.1- TGTGGATT CAGCCCTCATGGAGAGC  
SRR448694.85516447.1- TGTGGATT CAGCCCTCATGGAGAGC  
SRR448687.10881609.1+ TGTGGATT TAGCCCTCATGGAGAGCT  
SRR448687.88021195.1+ TGTGGATT CAGCCCTCATGGAGAGCT  
SRR448694.88407078.1+ TGTGGATT CAGCCCTCATGGAGAGCT  
SRR448675.76497237.1- TGTGGATT CAGCCCTCATGGAGAGCTGCC  
SRR448681.68030745.1+ TGTGGATT CAGCCCTCATGGAGAGCTGCC  
SRR448681.21545235.2+ TGTGGATT CAGCCCTCATGGAGAGCTGCCT  
SRR448687.42732058.1- TGTGGATT CAGCCCTCATGGAGAGCTGCCTG  
SRR448687.47390517.2+ TGTGGATT CAGCCCTCATGGAGAGCTGCCTG  
SRR448690.81061662.2+ TGTGGATT CAGCCCTCATGGAGAGCTGCCTG  
SRR448690.91569127.2+ TGTGGATT CAGCCCTCATGGAGAGCTGCCTG  
SRR448694.85881197.1- TGTGGATT CAGCCCTCATGGAGAGCTGCCTG  
SRR448675.34371245.2- TGTGGATT CAGCCCTCATGGAGAGCTGCCTGC  
SRR448681.32854092.1+ TGTGGATT CAGCCCTCATGGAGAGCTGCCTGCAT  
SRR448681.3793565.1+ TATGGATT CAGCCCTCATGGAGAGCTGCCTGGATC  
SRR448681.7337942.2+ TGTGGATT CAGCCCTCATGGAGAGCTGCCTGGATC  
SRR448687.6574725.1- TGTGGATT CAGCCCTCATGGAGAGCTGCCTGGATCTG  
SRR448686.24956981.2- TGTGGATT CAGCCCTCATGGAGAGCTGCCTGGATCTGAC  
SRR448686.25320476.1- TGTGGATT CAGCCCTCATGGAGAGCTGCCTGGATCTGACA  
SRR448690.52612250.1- TGTGGATT CAGCCCTCATGGAGAGCTGCCTGCATCTGACA  
SRR448675.81560484.1- TGTGGATT CAGCCCTCATGGAGAGCTGCCTGGATCTGACAT  
SRR448683.5610403.1+ TGTGGATT CAGCCCTCATGGAGAGCTGCCTGGATCTGACATTG  
SRR448681.54132602.1+ TGTGGATT CAGCCCTCATGGAGAGCTGCCTGCATCTGACATTGT  
SRR448688.40173627.2- TGTGGATT CAGCCCTCATGGAGAGCTGCCTGGATCTGACATTGTG  
SRR448683.54546641.2+ TGTGGATT CAGCCCTCATGGAGAGCTGCCTGCATCTGACATTGTGAG  
SRR448694.18506634.2+ TGTGGATT CAGCCCTCATGGAGAGCTGCCTGGATCTGACATTGTGAG  
SRR448694.67361378.2+ TGTGGATT CAGCCCTCATGGAGAGCTGCCTGGATCTGACATTGTGAG  
SRR448687.72215272.1+ TGTGGATT CAGCCCTCATGGAGAGCTGCCTGCATCTGGCATTGTGAGA  
SRR448699.87199114.1- TGTGGATT CAGCCCTCATGGAGAGCTGCCTGCATCTGACATTGTGAGA  
SRR448688.43048732.1+ TGTGGATT CAGCCCTCATGGAGAGCTGCCTGCATCTGACATTGTGAGAG  
SRR448699.1447497.2- TGTGGATT CAGCCCTCATGGAGAGCTGCCTGGATCTGACATTGTGAGAG  
SRR448686.95438255.1- TGTGGATT CAGCCCTCATGGAGAGCTGCCTGGATCTGACATTGTGAGAGG  
SRR448683.90493668.1+ TGTGGATT CAGCCCTCATGGAGAGCTGCCTGGATCTGACATTGTGAGAGGA  
SRR448681.21344736.2+ TGTGGATT CAGCCCTCATGGAGAGCTGCCTGGATCTGACATTGTGAGAGGAG  
SRR448683.31908163.1- TGTGGATT CAGCCCTCATGGAGAGCTGCCTGCATCTGACATTGTGAGAGGAG  
SRR448687.61688358.2- TGTGGATT CAGCCCTCATGGAGAGCTGCCTGGATCTGACATTGTGAGAGGAG  
SRR448681.66489052.2+ TGTGGATT CAGCCCTCATGGAGAGCTGCCTGCATCAGACATTGTGAGAGGAGG  
SRR448683.81894875.1+ TGTGGATT CAGCCCTCATGGAGAGCTGCCTGGATCTGACATTGTGAGAGGAGGT  
SRR448683.37959705.1- TGTGGATT CAGCCCTCATGGAGAGCTGCCTGCATCTGACATTGTGAGAGGAGGTT  
SRR448675.34322357.2+ TGTGGATT CAGCCCTCATGGAGAGCTGCCTGGATCTGACATTGTGAGAGGAGGTTGCC  
SRR448675.104363339.2- TGTGGATT CATCCCTCATGGAGAGCTGCCTGCATCTGACATTGTGAGAGGAGGTTGCCCTT  
SRR448675.24783207.1- TGTGGATT CAGCCCTCATGGAGAGCTGCCTGCATCTGACATTGTGAGAGGAGGTTGCCCTT  
SRR448681.63302088.2+ TGTGGATT CAGCCCTCATGGAGAGCTGCCTGCATCTGACATTGTGAGAGGAGGTTGCCCTT  
SRR448683.16844924.2+ TGTGGATT CAGCCCTCATGGAGAGAGCCCTGCATCTGACATTGTGAGAGGAGGTTGCCCTT  
SRR448675.100859301.1+ TGTGGATT CAGCCCTCATGGAGAGCTGCCTGGATCTGACATTGTGAGAGGAGGTTCCCTTC  
SRR448675.103252359.1+ TGTGGATT CAGCCCTCATGGAGAGCTGCCTGCATCTGACATTGTGAGAGGAGGTTGCCCTTC  
SRR448675.104128282.2- TGTGGATT CAGCCCTCATGGAGAGCTGCCTGGATCTGACATTGTGAGAGGAGGTTGCCCTTC  
SRR448675.29937986.2+ TGTGGATT CAGCCCTCATGGAGAGCTGCCTGCATCTGACATTGTGAGAGGAGGTTGCCCTTC  
SRR448675.59564553.2- TGTGGATT CAGCCCTCATGGAGAGCTGCCTGGATCTGACATTGTGAGAGGAGGTTGCCCTTC  
SRR448675.65770019.1- TGTGGATT CAGCCCTCATGGAGAGCTGCCTGCATCTGACATTGTGAGAGGAGGTTGCCCTTC  
SRR448675.88926626.1+ TGTGGATT CAGCCCTCATGGAGAGCTGCCTGCATCTGACATTGTGAGAGGAGGTTGCCCTTC  
SRR448675.92739025.1- TGTGGATT CAGCCCTCATGGAGAGCTGCCTGGATCTGACATTGTGAGAGGAGGTTGCCCTTC  
SRR448681.39820355.1+ TGTGGATT CAGCCCTCATGGAGAGCTGCCTGCATCTGACATTGTGAGAGGAGGTTGCCCTTC  
SRR448681.50099907.2- TGTGGATT CAGCCCTCATGGAGAGCTGCCTGGATCTGACATTGTGAGAGGAGGTTGCCCTTC  
SRR448681.73558260.2+ TGTGGATT CAGCCCTCATGGAGAGCTGCCTGGATCTGACATTGTGAGAGGAGGTTGCCCTTC  
SRR448681.7497961.2- TGTGGATT CAGCCCTCATGGAGAGCTGCCTGCATCTGACATTGTGAGAGGAGGTTGCCCTTC  
SRR448681.82661095.1+ TGTGGATT CAGCCCTCATGGAGAGCTGCCTGCATCTGACATTGTGAGAGGCGCGCCTTC  
SRR448681.97626341.1+ TGTGGATT CAGCCCTCATGGAGAGCTGCCTGCATCTGACATTGTGAGAGGAGGTTGCCCTTC  
SRR448683.15990850.1- TGTGGATT CAGCCCTCATGGAGAGCTGCCTGGATCTGACATTGTGAGAGGAGGTTGCCCTTC  
SRR448683.2954521.2- TGTGGATT CAGCCCTCATGGAGAGCTGCCTGCATCTGACATTGTGAGAGGAGGTTGCCCTTC  
SRR448683.42166054.2- TGTGGATT CAGCCCTCATGGAGAGCTGCCTGGATCTGACATTGTGAGAGGAGGTTGCCCTTC  
SRR448683.56266056.2+ TGTGGATT CAGCCCTCATGGAGAGCTGCCTGCATCTGACATTGTGAGAGGAGGTTGCCCTTC  
SRR448683.64053908.2+ TGTGGATT CAGCCCTCATGGAGAGCTGCCTGGATCTGACATTGTGAGAGGAGGTTGCCCTTC  
SRR448683.67390564.1- TGTGGATT CAGCCCTCATGGAGAGCTGCCTGGATCTGACATTGTGAGAGGAGGTTGCCCTTC  
SRR448683.69167326.1- TGTGGATT CAGCCCTCATGGAGAGCTGCCTGGATCTGACATTGTGAGAGGAGGTTGCCCTTC  
SRR448683.72556731.1- TGTGGATT CAGCCCTCATGGAGAGCTGCCTGCATCTGACATTGTGAGAGGAGGTTGCCCTTC  
SRR448683.79752369.1- TGTGGATT CAGCCCTCATGGAGAGCTGCCTGGATCTGACATTGTGAGAGGAGGTTGCCCTTC  
SRR448683.88276819.2- TGTGGATT CAGCCCTCATGGAGAGCTGCCTGCATCTGACATTGTGAGAGGAGGTTGCCCTTC  
SRR448683.92212587.1- TGTGGATT CAGCCCTCATGGAGAGCTGCCTGCATCTGACATTGTGAGAGGAGGTTGCCCTTC  
SRR448683.9537018.2- TGTGGATT CAGCCCTCATGGAGAGCTGCCTGGATCTGACATTGTGAGAGGAGGTTGCCCTTC  
SRR448686.106844158.2+ TGTGGATT CAGCCCTCATGGAGAGCTGCCTGGATCTGACATTGTGAGAGGAGGTTGCCCTTC  
SRR448686.108023284.1- TGTGGATT CAGCCCTCATGGAGAGCTGCCTGCATCTGACATTGTGAGAGGAGGTTGCCCTTC  
SRR448686.1930452.1- TGTGGATT CAGCCCTCATGGAGAGCTGCCTGGATCTGACATTGTGAGAGGAGGTTGCCCTTC  
SRR448686.59598963.1- TGTGGATT CAGCCCTCATGGAGAGCTGCCTGGATCTGACATTGTGAGAGGAGGTTGCCCTTC

SRR448686.91310581.1+ TGTGGATTAGCCCTCATGGAGAGCTGCCTGCATCTGACATTGTGAGAGGAGGTGCCTTC  
SRR448687.14912879.2- TGTGGATTATCCCTCATGGAGAGCTGCCTGCATCTGACATTGTGAGAGGAGGTGCCTTC  
SRR448687.23078728.1- TGTGGATTAGCCCTCATGGAGAGCTGCCTGCATCTGACATTGTGAGAGGAGGTGCCTTC  
SRR448687.31855042.1+ TGTGGATTAGCCCTCATGGAGAGCTGCCTGCATCTGACATTGTGAGAGGAGGTGCCTTC  
SRR448687.33039334.1+ TGTGGATTAGCCCTCATGGAGAGCTGCCTGCATCTGACATTGTGAGAGGAGGTGCCTTC  
SRR448687.39768395.1- TGTGGATTAGCCCTCATGGAGAGCTGCCTGGATCTGACATTGTGAGAGGAGGTGCCTTC  
SRR448687.51419033.1- TGTGGATTAGCCCTCATGGAGAGCTGCCTGCATCTGACATTGTGAGAGGAGGTGCCTTC  
SRR448687.65209642.1+ TGTGGATTAGCCCTCATGGAGAGCTGCCTGGATCTGACATTGTGAGAGGAGGTGCCTTC  
SRR448687.69057351.2- TGTGGATTAGCCCTCATGGAGAGCTGCCTGCATCTGACATTGTGAGAGGAGGTGCCTTC  
SRR448687.74386594.2+ TGTGGATTAGCCCTCATGGAGAGCTGCCTGCATCTGACATTGTGAGAGGAGGTGCCTTC  
SRR448687.76742462.2+ TGTGGATTAGCCCTCATGGAGAGCTGCCTGCATCTGACATTGTGAGAGGAGGTGCCTTC  
SRR448687.89718471.2+ TGTGGATTAGCCCTCATGGAGAGCTGCCTGCATCTGACATTGTGAGAGGAGGTGCCTTC  
SRR448694.90058685.1- TGTGGATTAGCCCTCATGGAGAGCTGCCTGCATCTGACATTGTGAGAGG  
SRR448699.57300782.1+ TGGATTAGCCCTCATGGAGAGCTGCCTGCATCTGACATTGTGAGAGGA  
SRR448699.105936149.1- GGATTAGCCCTCATGGAGAGCTGCCTGGATCTGACATTGTGAGAGGAG  
SRR448686.94018257.1- GGATTAGCCCTCATGGAGAGCTGCCTGCATCTGACATTGTGAGAGGAGGTGCCTTC  
SRR448681.21545235.1- ATTCAGCCCTCATGGAGAGCTGCCTGCATCTGACATTGTGAGAGGAGGTGCCTTC  
SRR448681.4625807.1+ ATTCAGCCCTCATGGAGAGCTGCCTGCATCTGACATTGTGAGAGGAGGTGCCTTC  
SRR448687.19754537.1- TTCAGCCCTCATGGAGAGCTGCCTGGATCTGACATTGTGAGAGGAGGTGCCTTC  
SRR448690.24936622.1- AGCCCTCATGGAGAGCTGCCTGGATCTGACATTGTGAGAGGAGGTGCCTTC  
SRR448690.60572380.1- AGCCCTCATGGAGAGCTGCCTGGATCTGACATTGTGAGAGGAGGTGCCTTC  
SRR448690.64980178.1- AGCCCTCATGGAGAGCTGCCTGGATCTGACATTGTGAGAGGAGGTGCCTTC  
SRR448690.66342636.1- AGCCCTCATGGAGAGCTGCCTGGATCTGACATTGTGAGAGGAGGTGCCTTC  
SRR448690.94974465.1- AGCCCTCATGGAGAGCTGCCTGGATCTGACATTGTGAGAGGAGGTGCCTTC  
SRR448675.92803720.2+ AGCCCTCATGGAGAGCTGCCTGGATCTGACATTGTGAGAGGAGGTGCCTTC  
SRR448681.7337942.1- AGCCCTCATGGAGAGCTGCCTGGATCTGACATTGTGAGAGGAGGTGCCTTC  
SRR448687.50111023.1+ AGCCCTCATGGAGAGCTGCCTGGATCTGACATTGTGAGAGGAGGTGCCTTC  
SRR448690.58786536.1- GCCCTCATGGAGAGCTGCCTGCATCTGACATTGTGAGAGGAGGTGCCTTC  
SRR448690.66186920.1- GCCCTCATGGAGAGCTGCCTGCATCTGACATTGTGAGAGGAGGTGCCTTC  
SRR448681.24459844.2+ GCCCTCATGGAGAGCTGCCTGGATCTGACATTGTGAGAGGAGGTGCCTTC  
SRR448681.3793565.2- GCCCTCATGGAGAGCTGCCTGGATCTGACATTGTGAGAGGAGGTGCCTTC  
SRR448686.105629760.1- GCCCTCCTGGAGAGCTGCCTGGATCTGACATTGTGAGAGGAGGTGCCTTC  
SRR448681.68030745.2- CCCTCAGGAGAGCTGCCTGCATCTGACATTGTGAGAGGAGGTGCCTTC  
SRR448683.76951253.2- CCCTCAGGACAGCTGCCTGCATCTGACATTGTGAGAGGAGGTGCCTTC  
SRR448683.89708988.1- CCCTCAGGAGAGCTGCCTGCATCTGACATTGTGAGAGGAGGTGCCTTC  
SRR448694.31238796.2- CCCTCATGGAGAGCTGCCTGGATCTGACATTGTGAGAGGAGGTGCCTTC  
SRR448694.69001203.1- CCCTCATGGAGAGCTGCCTGGATCTGACATTGTGAGAGGAGGTGCCTTC  
SRR448686.30719737.1+ TCATGGAGAGCTGCCTGCATCTGACATTGTGAGAGGAGGTGCCTTC  
SRR448681.32854092.2- ATGGAGAGCTGCCTGCATCTGACATTGTGAGAGGAGGTGCCTTC  
SRR448686.67600101.2+ ATGGAGAGCTGCCTGGATCTGACATTGTGAGAGGAGGTGCCTTC  
SRR448694.30972732.1- ATGGAGAGCTGCCTGGATCTGACATTGTGAGAGGAGGTGCCTTC  
SRR448694.77446518.1+ ATGGAGAGCTGCCTGGATCTGACATTGTGAGAGGAGGTGCCTTC  
SRR448699.62917460.1- ATGGAGAGCTGCCTGCATCTGACATTGTGAGAGGAGGTGCCTTC  
SRR448702.18987201.1- ATGGAGAGCTGCCTGGATCTGACATTGTGAGAGGAGGTGCCTTC  
SRR448702.56960720.1- ATGGAGAGCTGCCTGGATCTGACATTGTGAGAGGAGGTGCCTTC  
SRR448702.65613870.1- ATGGAGAGCTGCCTGGATCTGACATTGTGAGAGGAGGTGCCTTC  
SRR448681.85152453.1- TGGAGAGTTGCCTGCATCTGACATTGTGAGAGGAGGTGCCTTC  
SRR448681.54132602.2- GGAGAGCTGCCTGCATCTGACATTGTGAGAGGAGGTGCCTTC  
SRR448686.106659351.2- GGAGAGCTGCCTGCATCTGACATTGTGAGAGGAGGTGCCTTC  
SRR448687.35771328.2- GGAGAGCTGCCTGGATCTGACATTGTGAGAGGAGGTGCCTTC  
SRR448699.71823992.2+ GGAGAGCTGCCTGCATCTGACATTGTGAGAGGAGGTGCCTTC  
SRR448681.21344736.1- GAGAGCTGCCTGGATCTGACATTGTGAGAGGAGGTGCCTTC  
SRR448699.2138811.1+ GAGCTGCCTGCATCTGACATTGTGAGAGGAGGTGCCTTC  
SRR448699.31495046.1+ GAGCTGCCTGCATCTGACATTGTGAGAGGAGGTGCCTTC  
SRR448699.59251159.1+ GAGCTGCCTGCATCTGACATTGTGAGAGGAGGTGCCTTC  
SRR448690.55829523.1+ AGCTGCCTGCATCTGACATTGTGAGAGGAGGTGCCTTC  
SRR448690.86020218.2+ AGCTGCCTGCATCTGACATTGTGAGAGGAGGTGCCTTC  
SRR448690.99451614.2+ AGCTGCCTGCATCTGACATTGTGAGAGGAGGTGCCTTC  
SRR448694.16806995.2- AGCTGCCTGGATCTGACATTGTGAGAGGAGGTGCCTTC  
SRR448694.44498965.2- AGCTGCCTGGATCTGACATTGTGAGAGGAGGTGCCTTC  
SRR448675.103252359.2- CTGCCCTGCATCTGACATTGTGAGAGGAGGTGCCTTC  
SRR448686.3872877.2- CTGCCCTGGATCTGACATTGTGAGAGGAGGTGCCTTC  
SRR448687.21493552.2- CTGCCCTGGATCTGACATTGTGAGAGGAGGTGCCTTC  
SRR448683.74926472.1+ TGCCCTGGATCTGACATTGTGAGAGGAGGTGCCTTC  
SRR448675.55211359.1+ CCTGGATCTGACATTGTGAGAGGAGGTGCCTTC  
SRR448686.54291032.1+ CCTGCATCTGACATTGTGAGAGGAGGTGCCTTC  
SRR448681.63302088.1- CTGCATCTGACATTGTGAGAGGAGGTGCCTTC  
SRR448687.2419817.2- CATCTGACATTGTGAGAGGAGGTGCCTTC  
SRR448681.82661095.2- TCTGACATTGTGAGAGGAGGTGCCTTC  
SRR448686.54830197.1- TCTGACATGGTGTGAGAGGAGGTGCCTTC  
SRR448694.1529471.1- TCTGACATTGTGAGAGGAGGTGCCTTC  
SRR448694.3705273.1- TCTGACATTGTGAGAGGAGGTGCCTTC  
SRR448694.98235980.2- CTGACATTGTGAGAGGAGGTGCCTTC  
SRR448675.34322357.1- TGACATTGTGAGAGGAGGTGCCTTC  
SRR448681.52262572.1+ TGACATTGTGAGAGGAGGTGCCTTC  
SRR448681.66489052.1- ACATTGTGAGAGGAGGTGCCTTA  
SRR448686.60047141.1- ACATTGTGAGAGGAGGTGCCTTC  
SRR448699.53858420.2- ACATTGTGAGAGGAGGTGCCTTC  
SRR448687.53588449.2+ CATTTGTGAGAGGAGGTGCCTTC  
SRR448681.73558260.1- ATTTGTGAGAGGAGGTGCCTTC  
SRR448681.74492780.2+ ATTTGTGAGAGGAGGTGCCTTC  
SRR448681.97626341.2- ATTTGTGAGAGGAGGTGCCTTC  
SRR448683.38609304.2- TGTGAGAGGAGGTGCCTTC  
SRR448675.88926626.2- GTGAGAGGAGGTGCCTTC



SRR448675.104128282.2- TAAAAATGGCAGCATCTGCTTCTCTgta  
SRR448675.65770019.1+ TAAAAATGGCAGCATCTGCTTCTCTgtaagt  
SRR448683.15990850.1- TAAAAATGGCAGCATCTGCTTCTCTgtaagt  
SRR448690.101626234.1- TAAAAATGGCAGCATCTGCTTCTCTgtaagt  
SRR448690.9489931.1- TAAAAATGGCAGCATCTGCTTCTCTgtaagt  
SRR448681.50099907.2- TAAAAATGGCAGCATCTGCTTCTCTgtaagt  
SRR448688.24653805.1- TAAAAATGGCAGCATCTGCTTCTCTgtaagt  
SRR448694.89586431.1+ TAAAAATGGCAGCATCTGCTTCTCTgtaagt  
SRR448699.75512887.1+ TAAAAATGGCAGCATCTGCTTCTCTgtaagt  
SRR448686.91310581.1+ TAAAAATGGCAGCATCTGCTTCTCTgtaagt  
SRR448681.39820355.1+ TAAAAATGGCAGCATCTGCTTCTCTgtaagt  
SRR448683.64053908.2+ TAAAAATGGCAGCATCTGCTTCTCTgtaagt  
SRR448687.69057351.2- TAAAAATGGCAGCATCTGCTTCTCTgtaagt  
SRR448688.19366612.2- TAAAAATGGCAGCATCTGCTTCTCTgtaagt  
SRR448699.11267604.1- TAAAAATGGCAGCATCTGCTTCTCTgtaagt  
SRR448694.104960237.1- TAAAAATGGCAGCATCTGCTTCTCTgtaagt  
SRR448694.43393625.1- TAAAAATGGCAGCATCTGCTTCTCTgtaagt  
SRR448686.94018257.1- TAAAAATGGCAGCATCTGCTTCTCTgtaagt  
SRR448681.85152453.1- TAAAAATGGCAGCATCTGCTTCTCTgtaagt  
SRR448681.21545235.1- TAAAAATGGCAGCATCTGCTTCTCTgtaagt  
SRR448681.4625807.1+ TAAAAATGGCAGCATCTGCTTCTCTgtaagt  
SRR448699.112474019.1+ TAAAAATGGCAGCATCTGCTTCTCTgtaagt  
SRR448699.17013684.1+ TAAAAATGGCAGCATCTGCTTCTCTgtaagt  
SRR448699.3359303.1+ TAAAAATGGCAGCATCTGCTTCTCTgtaagt  
SRR448681.68030745.2- TAAAAATGGCAGCATCTGCTTCTCTgtaagt  
SRR448687.19754537.1- TAAAAATGGCAGCATCTGCTTCTCTgtaagt  
SRR448681.32854092.2- TAAAAATGGCAGCATCTGCTTCTCTgtaagt  
SRR448675.92803720.2+ TAAAAATGGCAGCATCTGCTTCTCTgtaagt  
SRR448681.7337942.1- TAAAAATGGCAGCATCTGCTTCTCTgtaagt  
SRR448687.50111023.1+ TAAAAATGGCAGCATCTGCTTCTCTgtaagt  
SRR448699.19251753.1+ TAAAAATGGCAGCATCTGCTTCTCTgtaagt  
SRR448699.60284909.1+ TAAAAATGGCAGCATCTGCTTCTCTgtaagt  
SRR448699.93854624.1+ TAAAAATGGCAGCATCTGCTTCTCTgtaagt  
SRR448681.24459844.2+ TAAAAATGGCAGCATCTGCTTCTCTgtaagt  
SRR448681.3793565.2- TAAAAATGGCAGCATCTGCTTCTCTgtaagt  
SRR448683.76951253.2- TAAAAATGGCAGCATCTGCTTCTCTgtaagt  
SRR448683.89708988.1- TAAAAATGGCAGCATCTGCTTCTCTgtaagt  
SRR448686.30719737.1+ TAAAAATGGCAGCATCTGCTTCTCTgtaagt  
SRR448686.67600101.2+ TAAAAATGGCAGCATCTGCTTCTCTgtaagt  
SRR448681.54132602.2- TAAAAATGGCAGCATCTGCTTCTCTgtaagt  
SRR448686.106659351.2- TAAAAATGGCAGCATCTGCTTCTCTgtaagt  
SRR448686.54291032.1+ TAAAAATGGCAGCATCTGCTTCTCTgtaagt  
SRR448687.35771328.2- TAAAAATGGCAGCATCTGCTTCTCTgtaagt  
SRR448681.21344736.1- TAAAAATGGCAGCATCTGCTTCTCTgtaagt  
SRR448675.100859301.2- TAAAAATGGCAGCATCTGCTTCTCTgtaagt  
SRR448675.103252359.2- TAAAAATGGCAGCATCTGCTTCTCTgtaagt  
SRR448675.27813751.2+ TAAAAATGGCAGCATCTGCTTCTCTgtaagt  
SRR448675.29937986.1- TAAAAATGGCAGCATCTGCTTCTCTgtaagt  
SRR448675.34322357.1- TAAAAATGGCAGCATCTGCTTCTCTgtaagt  
SRR448675.55058720.2+ TAAAAATGGCAGCATCTGCTTCTCTgtaagt  
SRR448675.55211359.1+ TAAAAATGGCAGCATCTGCTTCTCTgtaagt  
SRR448675.88926626.2- TAAAAATGGCAGCATCTGCTTCTCTgtaagt  
SRR448681.52262572.1+ TAAAAATGGCAGCATCTGCTTCTCTgtaagt  
SRR448681.63302088.1- TAAAAATGGCAGCATCTGCTTCTCTgtaagt  
SRR448681.66489052.1- TAAAAATGGCAGCATCTGCTTCTCTgtaagt  
SRR448681.73558260.1- TAAAAATGGCAGCATCTGCTTCTCTgtaagt  
SRR448681.74492780.2+ TAAAAATGGCAGCATCTGCTTCTCTgtaagt  
SRR448681.82661095.2- TAAAAATGGCAGCATCTGCTTCTCTgtaagt  
SRR448681.97626341.2- TAAAAATGGCAGCATCTGCTTCTCTgtaagt  
SRR448683.103280204.1+ TAAAAATGGCAGCATCTGCTTCTCTgtaagt  
SRR448683.12692921.1- TAAAAATGGCAGCATCTGCTTCTCTgtaagt  
SRR448683.26439403.1+ TAAAAATGGCAGCATCTGCTTCTCTgtaagt  
SRR448683.38609304.2- TAAAAATGGCAGCATCTGCTTCTCTgtaagt  
SRR448683.41964796.2- TAAAAATGGCAGCATCTGCTTCTCTgtaagt  
SRR448683.6008353.2+ TAAAAATGGCAGCATCTGCTTCTCTgtaagt  
SRR448683.74926472.1+ TAAAAATGGCAGCATCTGCTTCTCTgtaagt  
SRR448683.85260721.2- TAAAAATGGCAGCATCTGCTTCTCTgtaagt  
SRR448686.18126246.1- TAAAAATGGCAGCATCTGCTTCTCTgtaagt  
SRR448686.3872877.2- TAAAAATGGCAGCATCTGCTTCTCTgtaagt  
SRR448686.54830197.1- TAAAAATGGCAGCATCTGCTTCTCTgtaagt  
SRR448686.593803.1- TAAAAATGGCAGCATCTGCTTCTCTgtaagt  
SRR448686.60047141.1- TAAAAATGGCAGCATCTGCTTCTCTgtaagt  
SRR448687.20474580.1- TAAAAATGGCAGCATCTGCTTCTCTgtaagt  
SRR448687.21493552.2- TAAAAATGGCAGCATCTGCTTCTCTgtaagt  
SRR448687.2419817.2- TAAAAATGGCAGCATCTGCTTCTCTgtaagt  
SRR448687.25169379.1- TAAAAATGGCAGCATCTGCTTCTCTgtaagt  
SRR448687.53588449.2+ TAAAAATGGCAGCATCTGCTTCTCTgtaagt  
SRR448687.67472025.1- TAAAAATGGCAGCATCTGCTTCTCTgtaagt  
SRR448687.79714711.2- TAAAAATGGCAGCATCTGCTTCTCTgtaagt  
SRR448687.8856975.2- TAAAAATGGCAGCATCTGCTTCTCTgtaagt  
SRR448675.65770019.2- TAAAAATGGCAGCATCTGCTTCTCTgtaagt  
SRR448687.96591513.1+ TAAAAATGGCAGCATCTGCTTCTCTgtaagt  
SRR448675.83276572.2+ TAAAAATGGCAGCATCTGCTTCTCTgtaagt  
SRR448683.5269535.2- TAAAAATGGCAGCATCTGCTTCTCTgtaagt



SRR448681.48531411.2+  
SRR448688.43502939.1-  
SRR448686.11759748.1-  
SRR448686.77036164.2+  
SRR448675.107261507.1+  
SRR448686.51959512.2-  
SRR448686.112999163.1-  
SRR448687.28327880.2-  
SRR448686.68556123.2+  
SRR448694.39287712.2-  
SRR448694.64893080.2-  
SRR448702.24699021.2-  
SRR448702.26760819.2-  
SRR448702.27931894.2-  
SRR448702.29785359.2-  
SRR448702.61954721.2-  
SRR448702.71414955.2-  
SRR448702.72279098.2-  
SRR448702.74637775.2-  
SRR448702.81793783.2-  
SRR448702.9104901.2-  
SRR448702.9955743.2-  
SRR448690.22501808.2+  
SRR448690.36155819.2+  
SRR448690.57282333.2+  
SRR448690.83673025.2+  
SRR448699.56150436.1+  
SRR448686.91959985.2-  
SRR448687.95495483.2-  
SRR448683.90592100.2-  
SRR448687.93736509.1-  
SRR448702.725005023.2+  
SRR448702.57417831.2+  
SRR448702.71283349.2+  
SRR448702.71354704.2+  
SRR448702.75737206.2+  
SRR448702.79322973.2+  
SRR448702.96383647.2+  
SRR448681.4625807.2-  
SRR448683.87004555.2+  
SRR448687.6190006.2-  
SRR448688.43220813.1+  
SRR448688.52106493.1+  
SRR448688.62588768.1+  
SRR448688.990692.1+  
SRR448681.24459844.1-  
SRR448683.76750984.2+  
SRR448690.80864321.2-  
SRR448675.81395938.2-  
SRR448688.39740332.2+  
SRR448675.92803720.1-  
SRR448681.39820355.2-  
SRR448683.2563223.1+  
SRR448686.40703985.2-  
SRR448690.46976751.1+  
SRR448675.50850970.2+  
SRR448694.45712566.1-  
SRR448675.65170588.2+

AATGGCAGCATCTGCTTCTCTgtaagttgaacagatttcctcttcacccccctttgc  
ATGGCAGCATCTGCTTCTCTgtaagttgaacagatttcctcttcacccc  
ATGGCAGCATCTGCTTCTCTgtaagttgaacagatttcctcttcacccccctttgc  
ATGGCAGCATCTGCTTCTCTgtaagttgaacagatttcctcttcacccccctttgc  
TGGCAGCATCTGCTTCTCTgtaagttgaacagatttcctcttcacccccctttgc  
TGGCAGCATCTGCTTCTCTgtaagttgaacagatttcctcttcacccccctttgc  
GGCAGCATCTGCTTCTCTgtaagttgaacagatttcctcttcacccccctttgc  
GGCAGCATCTGCTTCTCTgtaagttgaacagatttcctcttcacccccctttgc  
GCAGCATCTGCTTCTCTgtaagttgaacagatttcctcttcacccccctttgc  
CAGCATCTGCTTCTCTgtaagttgaacagatttcctcttcacccccctt  
AGCATCTGCTTCTCTgtaagttgaacagatttcctcttcacccccctt  
AGCATCTGCTTCTCTgtaagttgaacagatttcctcttcacccccctt  
AGCATCTGCTTCTCTgtaagttgaacagatttcctcttcacccccctt  
AGCATCTGCTTCTCTgtaagttgaacagatttcctcttcacccccctt  
AGCATCTGCTTCTCTgtaagttgaacagatttcctcttcacccccctt  
AGCATCTGCTTCTCTgtaagttgaacagatttcctcttcacccccctt  
GCATCTGCTTCTCTgtaagttgaacagatttcctcttcacccccctttgc  
CATCTGCTTCTCTgtaagttgaacagatttcctcttcacccccctttgc  
CATCTGCTTCTCTgtaagttgaacagatttcctcttcacccccctttgc  
CATCTGCTTCTCTgtaagttgaacagatttcctcttcacccccctttgc  
CATCTGCTTCTCTgtaagttgaacagatttcctcttcacccccctttgc  
CATCTGCTTCTCTgtaagttgaacagatttcctcttcacccccctttgc  
CATCTGCTTCTCTgtaagttgaacagatttcctcttcacccccctttgc  
CATCTGCTTCTCTgtaagttgaacagatttcctcttcacccccctttgc  
TCTGCTTCTCTgtaagttgaacagatttcctcttcacccccctttgc  
CTGCTTCTCTgtaagttgaacagatttcctcttcacccccctttgc  
CTGCTTCTCTgtaagttgaacagatttcctcttcacccccctttgc  
TGCTTCTCTgtaagttgaacagatttcctcttcacccccctttgc  
TGCTTCTCTgtaagttgaacagatttcctcttcacccccctttgc  
TGCTTCTCTgtaagttgaacagatttcctcttcacccccctttgc  
TGCTTCTCTgtaagttgaacagatttcctcttcacccccctttgc  
GCTTCTCTgtaagttgaacagatttcctcttcacccccctttgc  
GCTTCTCTgtaagttgaacagatttcctcttcacccccctttgc  
GCTTCTCTgtaagttgaacagatttcctcttcacccccctttgc  
CTTCTCTgtaagttgaacagatttcctcttcacccccctttgc  
CTTCTCTgtaagttgaacagatttcctcttcacccccctttgc  
TTCTCTgtaagttgaacagatttcctcttcacccccctttgc  
TTCTCTgtaagttgaacagatttcctcttcacccccctttgc  
TTCTCTgtaagttgaacagatttcctcttcacccccctttgc  
TTCTCTgtaagttgaacagatttcctcttcacccccctttgc  
TCTCTgtaagttgaacagatttcctcttcacccccctttgc  
CTCTgtaagttgaacagatttcctcttcacccccctttgc  
TCTgtaagttgaacagatttcctcttcacccccctttgc  
CTgtaagttgaacagatttcctcttcacccccctttgc

consensus

TAAAATGGCAGCATCTGCTTCTCTgtaagttgaacagatttcctcttcacccccctttgc

## H. Rock pigeon (No. 47), exon 1, WGS data

- CAP3 alignment of WGS data spanning exon 1 (uppercase letters)

```

      .   :   .   :   .   :   .   :   .   :   .   :
SRR511912.10904274.2+   attggcaagactccgaaattgcagtggtcctggtgataA
SRR516981.37304474.2+   attggcaagactccgaaattgcagtggtcctggtgataA
SRR516996.43960638.2+   attggcaagactccgaaattgcagtggtcctggtgataA
SRR517006.10231357.2+   attggcaagactccgaaattgcagtggtcctggtgataA
SRR517006.16071194.2+   attggcaagactccgaaattgcagtggtcctggtgataA
SRR516967.148303398.1+   attggcaagactccgaaattgcagtggtcctggtgataAT
SRR516989.56316629.1+   attggcaagactccgaaattgcagtgatcctggtgataAT
SRR516999.97066835.2+   attggcaagactccgaaattgcagtggtcctggtgataAT
SRR516967.125704511.2+   attggcaagactccgaaattgcagtggtcctggtgataATG
SRR516995.40185498.2-   attggcaagactccgaaattgcagtggtcctggtgataATG
SRR516996.45030954.2-   attggcaagactccgaaattgcagtggtcctggtgataATG
SRR516997.75919883.2-   atcggcaagactccgaaatcgcagtggtcctggtgataATG
SRR511911.13083061.2-   attggcaagactccgaaattgcagtggtcctggtgataATGG
SRR511915.55090700.1+   attggcaagactccgaaattgcagtggtcctggtgataATGG
SRR511917.19484665.2+   attggcaagactccgaaattgcagtggtcctggtgataATGG
SRR516968.171429418.1-   attggcaagactccgaaatgcagtggtcctggtgataATGG
SRR516973.26502918.1+   attggcaagactccgaaattgcagtggtcctggtgataATGG
SRR516990.26399022.1+   attggcaagactccgaaattgcagtggtcctggtgataATGG
SRR516998.3146409.2+   attggcaagactccgaaattgcagtggtcctggtgataATGG
SRR517000.20199727.1+   attggcaagactccgaaattgcagtggtcctggtgataATGG
SRR511915.76881432.1+   attggcaagactccgaaattgcagtggtcctggtgataATGGC
SRR511917.13212508.1+   attggcaagactccgaaattgcagtggtcctggtgataATGGC
SRR516973.13923651.1+   atcggcaagactccgaaatcgcagtggtcatggtgataATGGC
SRR516981.56307628.2+   attggcaagactccgaaatgcagtggtcctggtgataATGGC
SRR516999.66646424.1-   attggcaagactccgaaattgcagtggtcctggtgataATGGC
SRR517003.52529179.1-   attggcaagactccgaaattgcagtggtcctggtgataATGGC
SRR516967.121468181.2+   attggcaagactccgaaattgcagtggtcctggtgataATGGCA
SRR516967.5677042.2+   attggcaagactccgaaatgcagtggtcctggtgataATGGCA
SRR516972.14209986.1+   attggcaagactccgaaattgcagtggtcctggtgataATGGCA
SRR511913.18817834.2-   attggcaagactccgaaattgcagtggtcctggtgataATGGCAG
SRR516975.17854041.1+   atcggcaagactccgaaatcgcagtggtcctggtgataATGGCAG
SRR516986.4527098.1-   attggcaagactccgaaatgcagtggtcctggtgataATGGCAG
SRR517002.35534784.2-   attggcaagactccgaaattgcagtggtcctggtgataATGGCAG
SRR511913.32159204.2-   attggcaagactccgaaattgcagtggtcctggtgataATGGCAGT
SRR511913.60163149.2-   attggcaagactccgaaattgcagtggtcctggtgataATGGCAGT
SRR511916.41456611.2+   attggcaagactccgaaatgcagtggtcctggtgataATGGCAGG
SRR511916.870334.1+   attggcaagactccgaaattgcagtggtcctggtgataATGGCAGT
SRR511917.59277348.2+   attggcaagactccgaaattgcagtggtcctggtgataATGGCAGG
SRR511917.73764240.1+   attggcaagactccgaaattgcagtggtcctggtgataATGGCAGT
SRR511917.74847508.2+   attggcaagactccgaaatgcagtggtcctggtgataATGGCAGG
SRR516991.12327481.1-   atcggcaagactccgaaatcgcagtggtcctggtgataATGGCAGT
SRR511913.7237934.2-   attggcaagactccgaaattgcagtggtcctggtgataATGGCAGTT
SRR511914.85920285.1+   attggcaagactccgaaattgcagtggtcctggtgataATGGCAGGT
SRR516983.601653.1-   attggcaagactccgaaatgcagtggtcctggtgataATGGCAGTT
SRR516989.69959453.2-   attggcaagactccgaaattgcagtggtcctggtgataATGGCAGTT
SRR516993.12254620.1-   attggcaagactccgaaattgcagtggtcctggtgataATGGCAGTT
SRR516995.30697500.2+   attggcaagactccgaaattgcagtggtcctggtgataATGGCAGTT
SRR517003.68088813.1+   attggcaagactccgaaatgcagtggtcctggtgataATGGCAGTT
SRR511912.6039191.2-   attggcaagactccgaaatgcagtggtcctggtgataATGGCAGTTC
SRR511915.71616142.2-   attggcaagactccgaaatgcagtggtcctggtgataATGGCAGTTC
SRR516987.71247483.1+   atcggcaagactccgaaatcgcagtggtcctggtgataATGGCAGTTC
SRR517006.75902656.1+   attggcaagactccgaaatgcagtggtcctggtgataATGGCAGTTC
SRR517007.10616984.1+   attggcaagactccgaaatgcagtggtcctggtgataATGGCAGGTT
SRR511892.27528962.2+   attggcaagactccgaaatgcagtggtcctggtgataATGGCAGGTTT
SRR516981.26225422.2-   attggcaagactccgaaattgcagtggtcctggtgataATGGCAGTTCT
SRR516981.56501324.1-   attggcaagactccgaaatgcagtggtcctggtgataATGGCAGTTCT
SRR516990.13617951.1-   attggcaagactccgaaatgcagtggtcctggtgataATGGCAGTTCT
SRR516995.63783405.1+   attggcaagactccgaaatgcagtggtcctggtgataATGGCAGTCT
SRR516997.26908206.1-   attggcaagactccgaaatgcagtggtcctggtgataATGGCAGTTCT
SRR516997.92109894.2-   atcggcaagactccgaaatcgcagtggtcctggtgataATGGCAGTTCT
SRR516975.22235529.1-   attggcaagactccgaaatgcagtggtcctggtgataATGGCAGTTCTT
SRR516982.63238094.1-   atcggcaagactccgaaatcgcagtggtcctggtgataATGGCAGTTCTT
SRR516990.2434805.2-   attggcaagactccgaaatgcagtggtcctggtgataATGGCAGTTCTT
SRR516990.48830689.2-   attggcaactactccgaaatgcagtggtcctggtgataATGGCAGTTCTT
SRR516968.60181167.2-   attggcaagactccgaaatgcagtggtcctggtgataATGGCAGTTCTTT
SRR516990.39880558.2-   attggcaagactccgaaatgcagtggtcctggtgataATGGCAGTTCTTTT
SRR516996.76886931.2+   attggcaagactccgaaatgcagtggtcctggtgataATGGCAGTCTTTTT
SRR517007.12538010.1-   attggcaagactccgaaatgcagtggtcctggtgataATGGCAGTCTTTTT
SRR517007.58137463.2-   attggcaagactccgaaatgcagtggtcctggtgataATGGCAGTCTTTTTT
SRR511911.69454746.2-   attggcaagactccgaaatgcagtggtcctggtgataATGGCAGTCTTTTTT
SRR516986.269274.2-   attggcaagactccgaaatgcagtggtcctggtgataATGGCAGTCTTTTTT
SRR517003.81748180.2-   atcggcaagactccgaaatgcagtggtcctggtgataATGGCAGTCTTTTTT
SRR516978.51401599.2-   atcggcaagactccgaaatgcagtggtcctggtgataATGGCAGTCTTTTTT
SRR516984.72157789.1+   atcggcaagactccgaaatgcagtggtcctggtgataATGGCAGGTGTTTTTCT
SRR516998.97862365.2+   attggcaagactccgaaatgcagtggtcctggtgataATGGCAGTTTTTTTTT
```

SRR517000.108297177.2- atcggcaagactccgaaatgacagtggtcctggtgataATGGCAGTCTTTTCT  
SRR517000.76398852.2+ attggcaagactccgaaatgacagtggtcctggtgataATGGCAGTCTTTTCT  
SRR517004.35366889.1- atcggcaagactccgaaatgacagtggtcctggtgataATGGCAGTCTTTTCT  
SRR516968.109083542.2+ attggcaagactccgaaatgacagtggtcctggtgataATGGCAGTCTTTTCTC  
SRR516981.17610135.2- attggcaagactccgaaatgacagtggtcctggtgataATGGCAGTCTTTTCTC  
SRR516993.43367430.1+ atcggcaagactccgaaatgacagtggtcctggtgataATGGCAGTCTTTTCTC  
SRR517008.2647950.2+ atcggcaagactccgaaatgacagtggtcctggtgataATGGCAGTATTTTCTC  
SRR516967.149002341.1- attggcaggactccgaaatgacagtggtcctggtgataATGGCAGTCTTTTCTCA  
SRR516967.63778390.1+ attngcaagactccgaaatgacagtggtcctggtgataATGGCAGTCTTTTCTCA  
SRR516977.47084677.2+ atcggcaagactccgaaatgacagtggtcctggtgataATGGCAGTCTTTTCTCA  
SRR516979.50136254.2+ atcggcaagactccgaaatgacagtggtcctggtgataATGGCAGTCTTTTCTCA  
SRR516989.38263129.1- attggcaagactccgaaatgacagtggtcctggtgataATGGCAGTCTTTTCTCA  
SRR511915.64407574.2- attggcaagactccgaaatgacagtggtcctggtgataATGGCAGTCTTTTCTCA  
SRR511915.64407713.2- attggcaagactccgaaatgacagtggtcctggtgataATGGCAGTCTTTTCTCA  
SRR516994.45722230.2+ atcggcaagactccgaaatgacagtggtcctggtgataATGGCAGTCTTTTCTCA  
SRR511911.51563603.2- attggcaagactccgaaatgacagtggtcctggtgataATGGCAGTCTTTTCTCAAG  
SRR511913.74486978.2- attggcaagactccgaaatgacagtggtcctggtgataATGGCAGTCTTTTCTCAAG  
SRR511915.39596443.1+ attggcaagactccgaaatgacagtggtcctggtgataATGGCAGTCTTTTCTCAAG  
SRR516967.59477310.2+ attggcaagactccgaaatgacagtggtcctggtgataATGGCAGTCTTTTCTCAAG  
SRR516973.3345899.1+ attggcaagactccgaaatgacagtggtcctggtgataATGGCAGTCTTTTCTCAAG  
SRR516975.11381701.2+ attggcaagactccgaaatgacagtggtcctggtgataATGGCAGTCTTTTCTCAAG  
SRR516976.25681997.1+ attggcaagactccgaaatgacagtggtcctggtgataATGGCAGTCTTTTCTCAAG  
SRR516991.24958347.1+ atcggcaagactccgaaatgacagtggtcctggtgataATGGCAGTCTTTTCTCAAG  
SRR516991.63054458.1+ atcggcaagactccgaaatgacagtggtcctggtgataATGGCAGTCTTTTCTCAAG  
SRR516993.7655946.1+ atcggcaagactccgaaatgacagtggtcctggtgataATGGCAGTCTTTTCTCAAG  
SRR517001.63430876.2+ atcggcaagactccgaaatgacagtggtcctggtgataATGGCAGTCTTTTCTCAAG  
SRR517002.29006876.1+ attggcaagactccgaaatgacagtggtcctggtgataATGGCAGTCTTTTCTCAAG  
SRR517006.16479440.1+ attggcaagactccgaaatgacagtggtcctggtgataATGGCAGTCTTTTCTCAAG  
SRR516968.106610860.2+ attggcaagactccgaaatgacagtggtcctggtgataATGGCAGTCTTTTCTCAAGT  
SRR516981.52610643.1+ attggcaagactccgaaatgacagtggtcctggtgataATGGCAGTCTTTTCTCAAGT  
SRR516994.13908675.1- atcggcaagactccgaaatgacagtggtcctggtgataATGGCAGTCTTTTCTCAAGT  
SRR516994.19939914.1- atcggcaagactccgaaatgacagtggtcctggtgataATGGCAGTCTTTTCTCAAGT  
SRR516999.53729530.2- attggcaagactccgaaatgacagtggtcctggtgataATGGCAGTCTTTTCTCAAGT  
SRR517000.24850193.1- atcggcaagactccgaaatgacagtggtcctggtgataATGGCAGTCTTTTCTCAAGT  
SRR511892.31593589.1- attggcaagactccgaaatgacagtggtcctggtgataATGGCAGTCTTTTCTCAAGTA  
SRR511892.45941781.1+ attggcaagactccgaaatgacagtggtcctggtgataATGGCAGTCTTTTCTCAAGTA  
SRR511892.55624723.1- attggcaagactccgaaatgacagtggtcctggtgataATGGCAGTCTTTTCTCAAGTA  
SRR511892.68477751.1- attggcaagactccgaaatgacagtggtcctggtgataATGGCAGTCTTTTCTCAAGTA  
SRR511892.9740145.1- attggcaagactccgaaatgacagtggtcctggtgataATGGCAGTCTTTTCTCAAGTA  
SRR511892.9740146.1- attggcaagactccgaaatgacagtggtcctggtgataATGGCAGTCTTTTCTCAAGTA  
SRR511911.17781748.1- attggcaagactccgaaatgacagtggtcctggtgataATGGCAGTCTTTTCTCAAGTA  
SRR511911.37480006.2- attggcaagactccgaaatgacagtggtcctggtgataATGGCAGTCTTTTCTCAAGTA  
SRR511911.40076074.2- attggcaagactccgaaatgacagtggtcctggtgataATGGCAGTCTTTTCTCAAGTA  
SRR511911.45670450.2- attggcaagactccgaaatgacagtggtcctggtgataATGGCAGTCTTTTCTCAAGTA  
SRR511911.61131441.1+ attggcaagactccgaaatgacagtggtcctggtgataATGGCAGTCTTTTCTCAAGTA  
SRR511911.71659560.2+ attggcaagactccgaaatgacagtggtcctggtgataATGGCAGTCTTTTCTCAAGTA  
SRR511912.1014472.1- attggcaagactccgaaatgacagtggtcctggtgataATGGCAGTCTTTTCTCAAGTA  
SRR511912.14258493.1- attggcaagactccgaaatgacagtggtcctggtgataATGGCAGTCTTTTCTCAAGTA  
SRR511912.14258649.1- attggcaagactccgaaatgacagtggtcctggtgataATGGCAGTCTTTTCTCAAGTA  
SRR511912.19294174.1+ attggcaagactccgaaatgacagtggtcctggtgataATGGCAGTCTTTTCTCAAGTA  
SRR511912.19294330.1+ attggcaagactccgaaatgacagtggtcctggtgataATGGCAGTCTTTTCTCAAGTA  
SRR511912.20631234.2- attggcaagactccgaaatgacagtggtcctggtgataATGGCAGTCTTTTCTCAAGTA  
SRR511912.4156394.1- attggcaagactccgaaatgacagtggtcctggtgataATGGCAGTCTTTTCTCAAGTA  
SRR511912.72370488.2+ attggcaagactccgaaatgacagtggtcctggtgataATGGCAGTCTTTTCTCAAGTA  
SRR511913.1169864.1+ attggcaagactccgaaatgacagtggtcctggtgataATGGCAGTCTTTTCTCAAGTA  
SRR511913.18852311.1- attggcaagactccgaaatgacagtggtcctggtgataATGGCAGTCTTTTCTCAAGTA  
SRR511913.20668125.2- attggcaagactccgaaatgacagtggtcctggtgataATGGCAGTCTTTTCTCAAGTA  
SRR511913.51810263.1- attggcaagactccgaaatgacagtggtcctggtgataATGGCAGTCTTTTCTCAAGTA  
SRR511913.52001769.2- attggcaagactccgaaatgacagtggtcctggtgataATGGCAGTCTTTTCTCAAGTA  
SRR511913.8247697.2+ attggcaagactccgaaatgacagtggtcctggtgataATGGCAGTCTTTTCTCAAGTA  
SRR511914.65840186.2- attggcaagactccgaaatgacagtggtcctggtgataATGGCAGTCTTTTCTCAAGTA  
SRR511914.68007108.2- attggcaagactccgaaatgacagtggtcctggtgataATGGCAGTCTTTTCTCAAGTA  
SRR511915.2956436.1- attggcaagactccgaaatgacagtggtcctggtgataATGGCAGTCTTTTCTCAAGTA  
SRR511915.2956742.1- attggcaagactccgaaatgacagtggtcctggtgataATGGCAGTCTTTTCTCAAGTA  
SRR511915.46810937.2+ attggcaagactccgaaatgacagtggtcctggtgataATGGCAGTCTTTTCTCAAGTA  
SRR511915.67432792.1+ attggcaagactccgaaatgacagtggtcctggtgataATGGCAGTCTTTTCTCAAGTA  
SRR516967.146282791.1- attggcaagactccgaaatgacagtggtcctggtgataATGGCAGTCTTTTCTCAAGTA  
SRR516967.14759904.2+ attggcaagactccgaaatgacagtggtcctggtgataATGGCAGTCTTTTCTCAAGTA  
SRR516967.54383831.1- attggcaagactccgaaatgacagtggtcctggtgataATGGCAGTCTTTTCTCAAGTA  
SRR516967.6221170.2+ attggcaagactccgaaatgacagtggtcctggtgataATGGCAGTCTTTTCTCAAGTA  
SRR516967.94416127.2+ attggcaagactccgaaatgacagtggtcctggtgataATGGCAGTCTTTTCTCAAGTA  
SRR516968.105088970.1- attggcaagactccgaaatgacagtggtcctggtgataATGGCAGTCTTTTCTCAAGTA  
SRR516968.115657864.2- attggcaagactccgaaatgacagtggtcctggtgataATGGCAGTCTTTTCTCAAGTA  
SRR516968.118272353.2+ atcggcaagactccgaaatgacagtggtcctggtgataATGGCAGTCTTTTCTCAAGTA  
SRR516968.140796502.2+ attggcaagactccgaaatgacagtggtcctggtgataATGGCAGTCTTTTCTCAAGTA  
SRR516968.145184287.1+ attggcaagactccgaaatgacagtggtcctggtgataATGGCAGTCTTTTCTCAAGTA  
SRR516968.15347757.1+ atcggcaagactccgaaatgacagtggtcctggtgataATGGCAGTCTTTTCTCAAGTA  
SRR516968.156018396.2+ attggcaagactccgaaatgacagtggtcctggtgataATGGCAGTCTTTTCTCAAGTA  
SRR516968.32902413.1- atcggcaagactccgaaatgacagtggtcctggtgataATGGCAGTCTTTTCTCAAGTA  
SRR516968.43850003.1+ atcggcaagactccgaaatgacagtggtcctggtgataATGGCAGTCTTTTCTCAAGTA  
SRR516968.6323756.1- attggcaagactccgaaatgacagtggtcctggtgataATGGCAGTCTTTTCTCAAGTA  
SRR516968.98150509.1- atcggcaagactccgaaatgacagtggtcctggtgataATGGCAGTCTTTTCTCAAGTA  
SRR516970.7640225.2+ atcggcaagactccgaaatgacagtggtcctggtgataATGGCAGTCTTTTCTCAAGTA  
SRR516971.1110705.2+ atcggcaagactccgaaatgacagtggtcctggtgataATGGCAGTCTTTTCTCAAGTA

SRR516971.15887332.2- atcggaagactccgaaattgcagtggtcctggtgataATGGCAGTCTTTTCTCAAGTA  
SRR516971.24445351.1+ atcggaagactccgaaattgcagtggtcctggtgataATGGCAGTCTTTTCTCAAGTA  
SRR516971.5736893.1- atcggaagactccgaaattgcagtggtcctggtgataATGGCAGTCTTTTCTCAAGTA  
SRR516972.51498046.1- atggcaagactccgaaattgcagtggtcctggtgataATGGCAGTCTTTTCTCAAGTA  
SRR516972.54921884.2+ atggcaagactccgaaattgcagtggtcctggtgataATGGCAGTCTTTTCTCAAGTA  
SRR516972.58439524.1- atggcaagactccgaaattgcagtggtcctggtgataATGGCAGTCTTTTCTCAAGTA  
SRR516972.67844320.1- atggcaagactccgaaattgcagtggtcctggtgataATGGCAGTCTTTTCTCAAGTA  
SRR516973.16283767.2+ atggcaagactccgaaattgcagtggtcctggtgataATGGCAGTCTTTTCTCAAGTA  
SRR516973.16890128.2+ atcggaagactccgaaattgcagtggtcctggtgataATGGCAGTCTTTTCTCAAGTA  
SRR516973.17477597.1- atggcaagactccgaaattgcagtggtcctggtgataATGGCAGTCTTTTCTCAAGTA  
SRR516973.19946759.2- atcggaagactccgaaattgcagtggtcctggtgataATGGCAGTCTTTTCTCAAGTA  
SRR516973.50577545.1+ atggcaagactccgaaattgcagtggtcctggtgataATGGCAGTCTTTTCTCAAGTA  
SRR516973.52994151.1- atggcaagactccgaaattgcagtggtcctggtgataATGGCAGTCTTTTCTCAAGTA  
SRR516974.36849866.2- atggcaagactccgaaattgcagtggtcctggtgataATGGCAGTCTTTTCTCAAGTA  
SRR516974.42555202.2+ atggcaagactccgaaattgcagtggtcctggtgataATGGCAGTCTTTTCTCAAGTA  
SRR516974.47709711.1+ atggcaagactccgaaattgcagtggtcctggtgataATGGCAGTCTTTTCTCAAGTA  
SRR516974.65206690.1- atggcaagactccgaaattgcagtggtcctggtgataATGGCAGTCTTTTCTCAAGTA  
SRR516974.65598927.2+ atggcaagactccgaaattgcagtggtcctggtgataATGGCAGTCTTTTCTCAAGTA  
SRR516974.72485008.1- atggcaagactccgaaattgcagtggtcctggtgataATGGCAGTCTTTTCTCAAGTA  
SRR516975.14702766.2- atcggaagactccgaaattgcagtggtcctggtgataATGGCAGTCTTTTCTCAAGTA  
SRR516975.27931365.1- atggcaagactccgaaattgcagtggtcctggtgataATGGCAGTCTTTTCTCAAGTA  
SRR516975.9441702.2- atggcaagactccgaaattgcagtggtcctggtgataATGGCAGTCTTTTCTCAAGTA  
SRR516976.12707927.1+ atcggaagactccgaaattgcagtggtcctggtgataATGGCAGTCTTTTCTCAAGTA  
SRR516976.24305739.2+ atggcaagactccgaaattgcagtggtcctggtgataATGGCAGTCTTTTCTCAAGTA  
SRR516976.5159916.1+ atggcaagactccgaaattgcagtggtcctggtgataATGGCAGTCTTTTCTCAAGTA  
SRR516976.8894843.2- atggcaagactccgaaattgcagtggtcctggtgataATGGCAGTCTTTTCTCAAGTA  
SRR516977.1612623.2- atcggaagactccgaaattgcagtggtcctggtgataATGGCAGTCTTTTCTCAAGTA  
SRR516977.42905173.2- atcggaagactccgaaattgcagtggtcctggtgataATGGCAGTCTTTTCTCAAGTA  
SRR516977.50923694.1- atcggaagactccgaaattgcagtggtcctggtgataATGGCAGTCTTTTCTCAAGTA  
SRR516977.63657923.1+ atcggaagactccgaaattgcagtggtcctggtgataATGGCAGTCTTTTCTCAAGTA  
SRR516977.73763692.1- atcggaagactccgaaattgcagtggtcctggtgataATGGCAGTCTTTTCTCAAGTA  
SRR516978.20535847.2- atcggaagactccgaaattgcagtggtcctggtgataATGGCAGTCTTTTCTCAAGTA  
SRR516978.4630760.1+ atcggaagactccgaaattgcagtggtcctggtgataATGGCAGTCTTTTCTCAAGTA  
SRR516978.48507581.2+ atcggaagactccgaaattgcagtggtcctggtgataATGGCAGTCTTTTCTCAAGTA  
SRR516978.57147863.2- atcggaagactccgaaattgcagtggtcctggtgataATGGCAGTCTTTTCTCAAGTA  
SRR516978.75075983.1- atcggaagactccgaaattgcagtggtcctggtgataATGGCAGTCTTTTCTCAAGTA  
SRR516978.9119600.2+ atcggaagactccgaaattgcagtggtcctggtgataATGGCAGTCTTTTCTCAAGTA  
SRR516979.11039952.1- atcggaagactccgaaattgcagtggtcctggtgataATGGCAGTCTTTTCTCAAGTA  
SRR516979.16080749.1+ atcggaagactccgaaattgcagtggtcctggtgataATGGCAGTCTTTTCTCAAGTA  
SRR516979.43816476.2+ atcggaagactccgaaattgcagtggtcctggtgataATGGCAGTCTTTTCTCAAGTA  
SRR516979.45053249.1- atcggaagactccgaaattgcagtggtcctggtgataATGGCAGTCTTTTCTCAAGTA  
SRR516979.5438653.1+ atcggaagactccgaaattgcagtggtcctggtgataATGGCAGTCTTTTCTCAAGTA  
SRR516980.12879649.1- atcggaagactccgaaattgcagtggtcctggtgataATGGCAGTCTTTTCTCAAGTA  
SRR516980.57095254.1+ atcggaagactccgaaattgcagtggtcctggtgataATGGCAGTCTTTTCTCAAGTA  
SRR516980.7236138.2- atcggaagactccgaaattgcagtggtcctggtgataATGGCAGTCTTTTCTCAAGTA  
SRR516980.8816673.2- atcggaagactccgaaattgcagtggtcctggtgataATGGCAGTCTTTTCTCAAGTA  
SRR516981.23321590.2- atggcaagactccgaaattgcagtggtcctggtgataATGGCAGTCTTTTCTCAAGTA  
SRR516981.26964373.2+ atggcaagactccgaaattgcagtggtcctggtgataATGGCAGTCTTTTCTCAAGTA  
SRR516981.35251407.1- atggcaagactccgaaattgcagtggtcctggtgataATGGCAGTCTTTTCTCAAGTA  
SRR516981.35677677.2- atggcaagactccgaaattgcagtggtcctggtgataATGGCAGTCTTTTCTCAAGTA  
SRR516981.76497254.2- atggcaagactccgaaattgcagtggtcctggtgataATGGCAGTCTTTTCTCAAGTA  
SRR516981.85604642.1- atggcaagactccgaaattgcagtggtcctggtgataATGGCAGTCTTTTCTCAAGTA  
SRR516982.31349844.1- atcggaagactccgaaattgcagtggtcctggtgataATGGCAGTCTTTTCTCAAGTA  
SRR516982.50768215.2+ atcggaagactccgaaattgcagtggtcctggtgataATGGCAGTCTTTTCTCAAGTA  
SRR516982.55151074.2- atcggaagactccgaaattgcagtggtcctggtgataATGGCAGTCTTTTCTCAAGTA  
SRR516983.19283942.1+ atggcaagactccgaaattgcagtggtcctggtgataATGGCAGTCTTTTCTCAAGTA  
SRR516983.72008022.1- atggcaagactccgaaattgcagtggtcctggtgataATGGCAGTCTTTTCTCAAGTA  
SRR516984.11685539.1+ atcggaagactccgaaattgcagtggtcctggtgataATGGCAGTCTTTTCTCAAGTA  
SRR516984.23515395.1+ atggcaagactccgaaattgcagtggtcctggtgataATGGCAGTCTTTTCTCAAGTA  
SRR516984.64702111.2- atggcaagactccgaaattgcagtggtcctggtgataATGGCAGTCTTTTCTCAAGTA  
SRR516985.219617.1+ atcggaagactccgaaattgcagtggtcctggtgataATGGCAGTCTTTTCTCAAGTA  
SRR516985.35211582.2- atcggaagactccgaaattgcagtggtcctggtgataATGGCAGTCTTTTCTCAAGTA  
SRR516985.49435852.1- atcggaagactccgaaattgcagtggtcctggtgataATGGCAGTCTTTTCTCAAGTA  
SRR516985.9120641.2+ atggcaagactccgaaattgcagtggtcctggtgataATGGCAGTCTTTTCTCAAGTA  
SRR516986.14794457.1+ atggcaagactccgaaattgcagtggtcctggtgataATGGCAGTCTTTTCTCAAGTA  
SRR516986.15967055.2- atggcaagactccgaaattgcagtggtcctggtgataATGGCAGTCTTTTCTCAAGTA  
SRR516986.21413362.2+ atcggaagactccgaaattgcagtggtcctggtgataATGGCAGTCTTTTCTCAAGTA  
SRR516986.24103450.2- atggcaagactccgaaattgcagtggtcctggtgataATGGCAGTCTTTTCTCAAGTA  
SRR516986.37049200.1- atggcaagactccgaaattgcagtggtcctggtgataATGGCAGTCTTTTCTCAAGTA  
SRR516986.44931411.2+ atcggaagactccgaaattgcagtggtcctggtgataATGGCAGTCTTTTCTCAAGTA  
SRR516987.79339821.1- atcggaagactccgaaattgcagtggtcctggtgataATGGCAGTCTTTTCTCAAGTA  
SRR516988.3500447.1- atcggaagactccgaaattgcagtggtcctggtgataATGGCAGTCTTTTCTCAAGTA  
SRR516988.42192760.1- atcggaagactccgaaattgcagtggtcctggtgataATGGCAGTCTTTTCTCAAGTA  
SRR516989.22778442.2+ atggcaagactccgaaattgcagtggtcctggtgataATGGCAGTCTTTTCTCAAGTA  
SRR516989.32990384.1- atggcaagactccgaaattgcagtggtcctggtgataATGGCAGTCTTTTCTCAAGTA  
SRR516989.44612348.1- atggcaagactccgaaattgcagtggtcctggtgataATGGCAGTCTTTTCTCAAGTA  
SRR516989.50454159.2- atggcaagactccgaaattgcagtggtcctggtgataATGGCAGTCTTTTCTCAAGTA  
SRR516989.69704079.1+ atggcaagactccgaaattgcagtggtcctggtgataATGGCAGTCTTTTCTCAAGTA  
SRR516989.75191770.1+ atggcaagactccgaaattgcagtggtcctggtgataATGGCAGTCTTTTCTCAAGTA  
SRR516989.8213552.2- atggcaagactccgaaattgcagtggtcctggtgataATGGCAGTCTTTTCTCAAGTA  
SRR516990.15863859.2+ atggcaagactccgaaattgcagtggtcctggtgataATGGCAGTCTTTTCTCAAGTA  
SRR516990.20604046.1- atggcaagactccgaaattgcagtggtcctggtgataATGGCAGTCTTTTCTCAAGTA  
SRR516990.40763061.2+ atggcaagactccgaaattgcagtggtcctggtgataATGGCAGTCTTTTCTCAAGTA  
SRR516991.3697767.1+ atggcaagactccgaaattgcagtggtcctggtgataATGGCAGTCTTTTCTCAAGTA

SRR516991.70672748.1- atcggaagactccgaaatgagcagtggtcctggtgataATGGCAGTCTTTTCTCAAGTA  
SRR516991.89333198.1+ atggcaagactccgaaatgagcagtggtcctggtgataATGGCAGTCTTTTCTCAAGTA  
SRR516993.33273789.1+ atcggaagactccgaaatgagcagtggtcctggtgataATGGCAGTCTTTTCTCAAGTA  
SRR516993.77596703.1+ atggcaagactccgaaatgagcagtggtcctggtgataATGGCAGTCTTTTCTCAAGTA  
SRR516993.84060022.1- atcggaagactccgaaatgagcagtggtcctggtgataATGGCAGTCTTTTCTCAAGTA  
SRR516994.27805045.1+ atcggaagactccgaaatgagcagtggtcctggtgataATGGCAGTCTTTTCTCAAGTA  
SRR516995.17755192.1- atcggaagactccgaaatgagcagtggtcctggtgataATGGCAGTCTTTTCTCAAGTA  
SRR516995.41614722.2- atggcaagactccgaaatgagcagtggtcctggtgataATGGCAGTCTTTTCTCAAGTA  
SRR516995.43843685.1- atcggaagactccgaaatgagcagtggtcctggtgataATGGCAGTCTTTTCTCAAGTA  
SRR516995.83414144.2- atcggaagactccgaaatgagcagtggtcctggtgataATGGCAGTCTTTTCTCAAGTA  
SRR516995.87128240.2- atcggaagactccgaaatgagcagtggtcctggtgataATGGCAGTCTTTTCTCAAGTA  
SRR516996.31113264.1- atggcaagactccgaaatgagcagtggtcctggtgataATGGCAGTCTTTTCTCAAGTA  
SRR516996.33042242.1- atggcaagactccgaaatgagcagtggtcctggtgataATGGCAGTCTTTTCTCAAGTA  
SRR516996.52401398.1+ atggcaagactccgaaatgagcagtggtcctggtgataATGGCAGTCTTTTCTCAAGTA  
SRR516996.66223613.1+ atggcaagactccgaaatgagcagtggtcctggtgataATGGCAGTCTTTTCTCAAGTA  
SRR516996.76179188.2+ atggcaagactccgaaatgagcagtggtcctggtgataATGGCAGTCTTTTCTCAAGTA  
SRR516997.4512656.1- atcggaagactccgaaatgagcagtggtcctggtgataATGGCAGTCTTTTCTCAAGTA  
SRR516997.55886851.2- atcggaagactccgaaatgagcagtggtcctggtgataATGGCAGTCTTTTCTCAAGTA  
SRR516997.58614765.1+ atcggaagactccgaaatgagcagtggtcctggtgataATGGCAGTCTTTTCTCAAGTA  
SRR516997.63356024.2- atggcaagactccgaaatgagcagtggtcctggtgataATGGCAGTCTTTTCTCAAGTA  
SRR516997.90536592.1+ atcggaagactccgaaatgagcagtggtcctggtgataATGGCAGTCTTTTCTCAAGTA  
SRR516998.100156656.1+ atggcaagactccgaaatgagcagtggtcctggtgataATGGCAGTCTTTTCTCAAGTA  
SRR516998.105122847.1- atcggaagactccgaaatgagcagtggtcctggtgataATGGCAGTCTTTTCTCAAGTA  
SRR516998.28200586.2- atggcaagactccgaaatgagcagtggtcctggtgataATGGCAGTCTTTTCTCAAGTA  
SRR516998.29687080.2- atcggaagactccgaaatgagcagtggtcctggtgataATGGCAGTCTTTTCTCAAGTA  
SRR516998.53967676.2- atggcaagactccgaaatgagcagtggtcctggtgataATGGCAGTCTTTTCTCAAGTA  
SRR516998.54079381.1- atggcaagactccgaaatgagcagtggtcctggtgataATGGCAGTCTTTTCTCAAGTA  
SRR516998.88264383.1+ atggcaagactccgaaatgagcagtggtcctggtgataATGGCAGTCTTTTCTCAAGTA  
SRR516999.100313301.1+ atggcaagactccgaaatgagcagtggtcctggtgataATGGCAGTCTTTTCTCAAGTA  
SRR516999.3393409.2- atggcaagactccgaaatgagcagtggtcctggtgataATGGCAGTCTTTTCTCAAGTA  
SRR516999.39456345.2- atggcaagactccgaaatgagcagtggtcctggtgataATGGCAGTCTTTTCTCAAGTA  
SRR516999.44920014.1+ atggcaagactccgaaatgagcagtggtcctggtgataATGGCAGTCTTTTCTCAAGTA  
SRR516999.4718727.1+ atggcaagactccgaaatgagcagtggtcctggtgataATGGCAGTCTTTTCTCAAGTA  
SRR516999.5917.1+ atggcaagactccgaaatgagcagtggtcctggtgataATGGCAGTCTTTTCTCAAGTA  
SRR516999.78625944.1+ atggcaagactccgaaatgagcagtggtcctggtgataATGGCAGTCTTTTCTCAAGTA  
SRR516999.92446757.1- atggcaagactccgaaatgagcagtggtcctggtgataATGGCAGTCTTTTCTCAAGTA  
SRR516999.93433337.2- atggcaagactccgaaatgagcagtggtcctggtgataATGGCAGTCTTTTCTCAAGTA  
SRR517000.36678948.1+ atggcaagactccgaaatgagcagtggtcctggtgataATGGCAGTCTTTTCTCAAGTA  
SRR517000.54991829.2+ atcggaagactccgaaatgagcagtggtcctggtgataATGGCAGTCTTTTCTCAAGTA  
SRR517000.63898591.1- atcggaagactccgaaatgagcagtggtcctggtgataATGGCAGTCTTTTCTCAAGTA  
SRR517001.63940723.2+ atcggaagactccgaaatgagcagtggtcctggtgataATGGCAGTCTTTTCTCAAGTA  
SRR517001.87930230.1- atcggaagactccgaaatgagcagtggtcctggtgataATGGCAGTCTTTTCTCAAGTA  
SRR517002.15955724.1- atggcaagactccgaaatgagcagtggtcctggtgataATGGCAGTCTTTTCTCAAGTA  
SRR517002.31507094.2- atggcaagactccgaaatgagcagtggtcctggtgataATGGCAGTCTTTTCTCAAGTA  
SRR517002.32972405.2- atggcaagactccgaaatgagcagtggtcctggtgataATGGCAGTCTTTTCTCAAGTA  
SRR517002.54888386.2- atggcaagactccgaaatgagcagtggtcctggtgataATGGCAGTCTTTTCTCAAGTA  
SRR517002.90607223.1+ atggcaagactccgaaatgagcagtggtcctggtgataATGGCAGTCTTTTCTCAAGTA  
SRR517002.97801972.1- atggcaagactccgaaatgagcagtggtcctggtgataATGGCAGTCTTTTCTCAAGTA  
SRR517003.12649627.2- atggcaagactccgaaatgagcagtggtcctggtgataATGGCAGTCTTTTCTCAAGTA  
SRR517003.21132339.1- atggcaagactccgaaatgagcagtggtcctggtgataATGGCAGTCTTTTCTCAAGTA  
SRR517003.33620522.1- atcggaagactccgaaatgagcagtggtcctggtgataATGGCAGTCTTTTCTCAAGTA  
SRR517003.39098715.2- atcggaagactccgaaatgagcagtggtcctggtgataATGGCAGTCTTTTCTCAAGTA  
SRR517004.23920483.1+ atcggaagactccgaaatgagcagtggtcctggtgataATGGCAGTCTTTTCTCAAGTA  
SRR517004.41059246.1+ atcggaagactccgaaatgagcagtggtcctggtgataATGGCAGTCTTTTCTCAAGTA  
SRR517004.42185234.1- atcggaagactccgaaatgagcagtggtcctggtgataATGGCAGTCTTTTCTCAAGTA  
SRR517004.51768700.2- atcggaagactccgaaatgagcagtggtcctggtgataATGGCAGTCTTTTCTCAAGTA  
SRR517005.61532069.2- atcggaagactccgaaatgagcagtggtcctggtgataATGGCAGTCTTTTCTCAAGTA  
SRR517005.73305592.2- atcggaagactccgaaatgagcagtggtcctggtgataATGGCAGTCTTTTCTCAAGTA  
SRR517005.7777984.1+ atcggaagactccgaaatgagcagtggtcctggtgataATGGCAGTCTTTTCTCAAGTA  
SRR517006.47673006.2- atggcaagactccgaaatgagcagtggtcctggtgataATGGCAGTCTTTTCTCAAGTA  
SRR517006.55093488.2- atggcaagactccgaaatgagcagtggtcctggtgataATGGCAGTCTTTTCTCAAGTA  
SRR517006.5583744.1- atggcaagactccgaaatgagcagtggtcctggtgataATGGCAGTCTTTTCTCAAGTA  
SRR517007.13507481.1+ atggcaagactccgaaatgagcagtggtcctggtgataATGGCAGTCTTTTCTCAAGTA  
SRR517007.35305430.2- atggcaagactccgaaatgagcagtggtcctggtgataATGGCAGTCTTTTCTCAAGTA  
SRR517007.68739089.1+ atggcaagactccgaaatgagcagtggtcctggtgataATGGCAGTCTTTTCTCAAGTA  
SRR517007.7845014.1- atggcaagactccgaaatgagcagtggtcctggtgataATGGCAGTCTTTTCTCAAGTA  
SRR517007.8592877.1- atggcaagactccgaaatgagcagtggtcctggtgataATGGCAGTCTTTTCTCAAGTA  
SRR517008.41558359.1+ atcggaagactccgaaatgagcagtggtcctggtgataATGGCAGTCTTTTCTCAAGTA  
SRR517008.63631025.2- atcggaagactccgaaatgagcagtggtcctggtgataATGGCAGTCTTTTCTCAAGTA  
SRR517008.75782648.1- atcggaagactccgaaatgagcagtggtcctggtgataATGGCAGTCTTTTCTCAAGTA  
SRR517009.19677786.1- atggcaagactccgaaatgagcagtggtcctggtgataATGGCAGTCTTTTCTCAAGTA  
SRR517009.22120276.1+ atggcaagactccgaaatgagcagtggtcctggtgataATGGCAGTCTTTTCTCAAGTA  
SRR517009.26922977.2+ atcggaagactccgaaatgagcagtggtcctggtgataATGGCAGTCTTTTCTCAAGTA  
SRR517009.26982378.2+ atggcaagactccgaaatgagcagtggtcctggtgataATGGCAGTCTTTTCTCAAGTA  
SRR517009.73111776.1- atggcaagactccgaaatgagcagtggtcctggtgataATGGCAGTCTTTTCTCAAGTA  
SRR517009.7493725.1- atggcaagactccgaaatgagcagtggtcctggtgataATGGCAGTCTTTTCTCAAGTA  
SRR517009.85179959.2- atggcaagactccgaaatgagcagtggtcctggtgataATGGCAGTCTTTTCTCAAGTA  
SRR511917.12998789.2+ atggcaagactccgaaatgagcagtggtcctggtgataATGGCAGT  
SRR511917.12998927.2+ atggcaagactccgaaatgagcagtggtcctggtgataATGGCAGT  
SRR511917.51708370.2+ atggcaagactccgaaatgagcagtggtcctggtgataATGGCAGT  
SRR511911.29686714.2- atggcaagactccgaaatgagcagtggtcctggtgataATGGCAGTCTTTTCTCAAGTA  
SRR517000.66457751.1+ atggcaagactccgaaatgagcagtggtcctggtgataATGGCAGTCTTTTCTCAAGTA  
SRR517002.10945551.1- atggcaagactccgaaatgagcagtggtcctggtgataATGGCAGTCTTTTCTCAAGTA  
SRR516975.4624241.1+ atggcaagactccgaaatgagcagtggtcctggtgataATGGCAGTCTTTTCTCAAGTA

SRR516987.76366948.2- tggcaagactccgaaattgcagtggtcctggtgataATGGCAGTCTTTTCTCAAGTA  
SRR516990.64951029.2+ tggcaagactccgaaattgcagtggtcctggtgataATGGCAGTCTTTTCTCAAGTA  
SRR516993.11025707.2- tggcaagactccgaaattgcagtggtcctggtgataATGGCAGTCTTTTCTCAAGTA  
SRR516998.78835527.1+ tggcaagactccgaaattgcagtggtcctggtgataATGGCAGTCTTTTCTCAAGTA  
SRR516998.83658111.2+ tggcaagactccgaaattgcagtggtcctggtgataATGGCAGTCTTTTCTCAAGTA  
SRR517000.39640223.2+ tggcaagactccgaaattgcagtggtcctggtgataATGGCAGTCTTTTCTCAAGTA  
SRR517002.44210664.1- tggcaagactccgaaattgcagtggtcctggtgataATGGCAGTCTTTTCTCAAGTA  
SRR511914.19951607.1- ggcaagactccgaaattgcagtggtcctggtgataATGGCAGTCTTTTCTCAAGTA  
SRR516967.129799720.1- ggcaagactccgaaattgcagtggtcctggtgataATGGCAGTCTTTTCTCAAGTA  
SRR516974.46565740.2- ggcaagactccgaaattgcagtggtcctggtgataATGGCAGTCTTTTCTCAAGTA  
SRR516978.52604776.1- ggcaagactccgaaattgcagtggtcctggtgataATGGCAGTCTTTTCTCAAGTA  
SRR517002.50187769.1+ ggcaagactccgaaattgcagtggtcctggtgataATGGCAGTCTTTTCTCAAGTA  
SRR511916.54430845.1- gcaagactccgaaattgcagtggtcctggtgataATGGCAGTCTTTTCTCAAGTA  
SRR511917.35012429.2- gcaagactccgaaattgcagtggtcctggtgataATGGCAGTCTTTTCTCAAGTA  
SRR516969.9631131.1+ gcaagactccgaaattgcagtggtcctggtgataATGGCAGTCTTTTCTCAAGTA  
SRR516978.38239451.2- gcaagactccgaaattgcagtggtcctggtgataATGGCAGTCTTTTCTCAAGTA  
SRR516991.87080495.1- gcaagactccgaaattgcagtggtcctggtgataATGGCAGTCTTTTCTCAAGTA  
SRR516999.14760583.2- gcaagactccgaaattgcagtggtcctggtgataATGGCAGTCTTTTCTCAAGTA  
SRR517008.76003299.2- gcaagactccgaaattgcagtggtcctggtgataATGGCAGTCTTTTCTCAAGTA  
SRR516967.102120548.1- caagactccgaaattgcagtggtcctggtgataATGGCAGTCTTTTCTCAAGTA  
SRR516967.59801249.2- caagactccgaaattgcagtggtcctggtgataATGGCAGTCTTTTCTCAAGTA  
SRR516973.60429677.2+ caagactccgaaattgcagtggtcctggtgataATGGCAGTCTTTTCTCAAGTA  
SRR516978.14537581.1+ caagactccgaaattgcagtggtcctggtgataATGGCAGTCTTTTCTCAAGTA  
SRR516980.14193627.1+ caagactccgaaattgcagtggtcctggtgataATGGCAGTCTTTTCTCAAGTA  
SRR516985.4837674.2+ caagactccgaaattgcagtggtcctggtgataATGGCAGTCTTTTCTCAAGTA  
SRR516987.56665405.2+ caagactccgaaattgcagtggtcctggtgataATGGCAGTCTTTTCTCAAGTA  
SRR516993.66881456.2+ caagactccgaaattgcagtggtcctggtgataATGGCAGTCTTTTCTCAAGTA  
SRR517000.5336928.1- caagactccgaaattgcagtggtcctggtgataATGGCAGTCTTTTCTCAAGTA  
SRR511892.53930910.2+ aagactccgaaattgcagtggtcctggtgataATGGCAGTCTTTTCTCAAGTA  
SRR511911.45879133.1+ aagactccgaaattgcagtggtcctggtgataATGGCAGTCTTTTCTCAAGTA  
SRR516983.47760221.1- aagactccgaaattgcagtggtcctggtgataATGGCAGTCTTTTCTCAAGTA  
SRR516992.6818043.1- aagactccgaaattgcagtggtcctggtgataATGGCAGTCTTTTCTCAAGTA  
SRR516994.75464207.2+ aagactccgaaattgcagtggtcctggtgataATGGCAGTCTTTTCTCAAGTA  
SRR516996.89309997.1+ aagactccgaaattgcagtggtcctggtgataATGGCAGTCTTTTCTCAAGTA  
SRR516974.1040705.1+ agactccgaaattgcagtggtcctggtgataATGGCAGTCTTTTCTCAAGTA  
SRR516979.60567804.1+ agactccgaaattgcagtggtcctggtgataATGGCAGTCTTTTCTCAAGTA  
SRR516990.13785933.1- agactccgaaattgcagtggtcctggtgataATGGCAGTCTTTTCTCAAGTA  
SRR516990.60703481.2- agactccgaaattgcagtggtcctggtgataATGGCAGTCTTTTCTCAAGTA  
SRR517008.30257719.1+ agactccgaaattgcagtggtcctggtgataATGGCAGTCTTTTCTCAAGTA  
SRR511892.22460703.1+ gactccgaaattgcagtggtcctggtgataATGGCAGTCTTTTCTCAAGTA  
SRR516967.118206337.1- gactccgaaattgcagtggtcctggtgataATGGCAGTCTTTTCTCAAGTA  
SRR516977.47216005.2+ gactccgaaattgcagtggtcctggtgataATGGCAGTCTTTTCTCAAGTA  
SRR516984.23605175.2+ gactccgaaattgcagtggtcctggtgataATGGCAGTCTTTTCTCAAGTA  
SRR517006.41660503.1- gactccgaaattgcagtggtcctggtgataATGGCAGTCTTTTCTCAAGTA  
SRR516972.58990870.1- actccgaaattgcagtggtcctggtgataATGGCAGTCTTTTCTCAAGTA  
SRR516975.45005523.1- actccgaaattgcagtggtcctggtgataATGGCAGTCTTTTCTCAAGTA  
SRR516977.70276963.1+ actccgaaattgcagtggtcctggtgataATGGCAGTCTTTTCTCAAGTA  
SRR517004.33967467.1+ actccgaaattgcagtggtcctggtgataATGGCAGTCTTTTCTCAAGTA  
SRR517007.68737803.1- actccgaaattgcagtggtcctggtgataATGGCAGTCTTTTCTCAAGTA  
SRR511917.30057537.2+ ctccgaaattgcagtggtcctggtgataATGGCAGTCTTTTCTCAAGT  
SRR516967.132651451.2+ ctccgaaattgcagtggtcctggtgataATGGCAGTCTTTTCTCAAGTA  
SRR516967.94039320.2+ ctccgaaattgcagtggtcctggtgataATGGCAGTCTTTTCTCAAGTA  
SRR516973.18821850.2- ctccgaaattgcagtggtcctggtgataATGGCAGTCTTTTCTCAAGTA  
SRR516973.18821853.2- ctccgaaattgcagtggtcctggtgataATGGCAGTCTTTTCTCAAGTA  
SRR516973.42617646.2- ctccgaaattgcagtggtcctggtgataATGGCAGTCTTTTCTCAAGTA  
SRR516974.6201811.2+ ctccgaaattgcagtggtcctggtgataATGGCAGTCTTTTCTCAAGTA  
SRR516999.97278751.1+ ctccgaaattgcagtggtcctggtgataATGGCAGTCTTTTCTCAAGTA  
SRR511912.61545448.1+ tccgaaattgcagtggtcctggtgataATGGCAGTCTTTTCTCAAGTA  
SRR511912.74095538.1- tccgaaattgcagtggtcctggtgataATGGCAGTCTTTTCTCAAGTA  
SRR517008.5489452.2- tccgaaattgcagtggtcctggtgataATGGCAGTCTTTTCTCAAGTA  
SRR516967.149674807.1+ ccgaaattgcagtggtcctggtgataATGGCAGTCTTTTCTCAAGTA  
SRR516969.22222210.2- ccgaaattgcagtggtcctggtgataATGGCAGTCTTTTCTCAAGTA  
SRR516972.57623491.1- ccgaaattgcagtggtcctggtgataATGGCAGTCTTTTCTCAAGTA  
SRR516975.29785312.1- ccgaaattgcagtggtcctggtgataATGGCAGTCTTTTCTCAAGTA  
SRR516976.70234108.2- ccgaaattgcagtggtcctggtgataATGGCAGTCTTTTCTCAAGTA  
SRR516981.43595596.1- ccgaaattgcagtggtcctggtgataATGGCAGTCTTTTCTCAAGTA  
SRR516983.13010793.1- ccgaaattgcagtggtcctggtgataATGGCAGTCTTTTCTCAAGTA  
SRR516987.1841637.2- ccgaaattgcagtggtcctggtgataATGGCAGTCTTTTCTCAAGTA  
SRR516989.66572423.2+ ccgaaattgcagtggtcctggtgataATGGCAGTCTTTTCTCAAGTA  
SRR516999.1552100.2- ccgaaattgcagtggtcctggtgataATGGCAGTCTTTTCTCAAGTA  
SRR517005.67585549.2- ccgaaattgcagtggtcctggtgataATGGCAGTCTTTTCTCAAGTA  
SRR516975.41855794.2+ cgaaattgcagtggtcctggtgataATGGCAGTCTTTTCTCAAGTA  
SRR516986.39849151.2- cgaaattgcagtggtcctggtgataATGGCAGTCTTTTCTCAAGTA  
SRR517000.91150091.2+ cgaaattgcagtggtcctggtgataATGGCAGTCTTTTCTCAAGTA  
SRR517004.53237476.2+ cgaaattgcagtggtcctggtgataATGGCAGTCTTTTCTCAAGTA  
SRR517005.54024085.1- cgaaattgcagtggtcctggtgataATGGCAGTCTTTTCTCAAGTA  
SRR516968.40141403.2+ gaaattgcagtggtcctggtgataATGGCAGTCTTTTCTCAAGTA  
SRR516970.30184580.1- gaaattgcagtggtcctggtgataATGGCAGTCTTTTCTCAAGTA  
SRR516984.75040283.2- gaaattgcagtggtcctggtgataATGGCAGTCTTTTCTCAAGTA  
SRR516990.22073434.1- gaaattgcagtggtcctggtgataATGGCAGTCTTTTCTCAAGTA  
SRR516995.43463521.1- gaaattgcagtggtcctggtgataATGGCAGTCTTTTCTCAAGTA  
SRR516997.21480163.2- gaaattgcagtggtcctggtgataATGGCAGTCTTTTCTCAAGTA  
SRR516997.47194944.1- gaaattgcagtggtcctggtgataATGGCAGTCTTTTCTCAAGTA  
SRR517006.12195593.1+ gaaattgcagtggtcctggtgataATGGCAGTCTTTTCTCAAGTA











|                        |                   |
|------------------------|-------------------|
| SRR517003.12649627.2-  | TCAA              |
| SRR516968.15347757.1+  | TCAAG             |
| SRR516968.32902413.1-  | TCAAG             |
| SRR516972.54921884.2+  | TCAAG             |
| SRR516974.65206690.1-  | TCAAG             |
| SRR516977.42905173.2-  | TCAAG             |
| SRR516985.35211582.2-  | TCAAG             |
| SRR516988.3500447.1-   | TCAAG             |
| SRR516988.42192760.1-  | TCAAG             |
| SRR517006.47673006.2-  | TCAAG             |
| SRR516980.12879649.1-  | TCAAGG            |
| SRR516981.35251407.1-  | TCAAGG            |
| SRR516990.20604046.1-  | TCAAGG            |
| SRR517004.41059246.1+  | TCAAGG            |
| SRR517006.55093488.2-  | TCAAGG            |
| SRR517007.7845014.1-   | TCAAGG            |
| SRR511892.55624723.1-  | TCAAGGG           |
| SRR516968.156018396.2+ | TCAAGGG           |
| SRR516976.24305739.2+  | TCAAAGG           |
| SRR516993.84060022.1-  | TCAAGGG           |
| SRR517002.32972405.2-  | TCAAGGG           |
| SRR517007.35305430.2-  | TCAAGGG           |
| SRR516968.43850003.1+  | TCAAGGGT          |
| SRR516975.14702766.2-  | TCAAGGGT          |
| SRR516975.27931365.1-  | TCAAGGGT          |
| SRR516982.55151074.2+  | TCAAGGGT          |
| SRR516984.64702111.2-  | TCAAGGGT          |
| SRR516986.44931411.2+  | TCAAGGGT          |
| SRR516989.69704079.1+  | TCAAGGGT          |
| SRR516998.105122847.1- | TCAAGGGT          |
| SRR516998.29687080.2-  | TCAAGGGT          |
| SRR517007.13507481.1+  | TCAAGGGT          |
| SRR517009.22120276.1+  | TCAAGGGG          |
| SRR511912.14258493.1-  | TCAAGGGTA         |
| SRR511912.14258649.1-  | TCAAGGGTA         |
| SRR516978.57147863.2-  | TCAAGGGTA         |
| SRR516996.31113264.1-  | TCAAGGGTA         |
| SRR516997.63356024.2-  | TCAAGGGTA         |
| SRR511916.23406501.2+  | TCAAGGGGAT        |
| SRR516968.98150509.1-  | TCAAGGGTAT        |
| SRR516971.15887332.2-  | TCAAGGGTAT        |
| SRR516976.8894843.2-   | TCAAGGGTAT        |
| SRR516985.49435852.1-  | TCAAGGGTAT        |
| SRR516989.32990384.1-  | TCAAGGGTAT        |
| SRR517002.15955724.1-  | TCAAGGGTAT        |
| SRR517006.5583744.1-   | TCAAGGGTAT        |
| SRR511913.51810263.1-  | TCAAGGGTATG       |
| SRR516968.6323756.1-   | TCAAGGGTATG       |
| SRR516971.24445351.1+  | TCCAGGGTATG       |
| SRR516978.75075983.1-  | TCAAGGGTATG       |
| SRR516983.72008022.1-  | TCAAGGGTATG       |
| SRR516974.65598927.2+  | TCAAGGGCATGC      |
| SRR516984.11685539.1+  | TCAAGGGTATGC      |
| SRR516985.9120641.2+   | TCAAGGGTATGC      |
| SRR516989.50454159.2-  | TCAAGGGTATGC      |
| SRR516998.54079381.1-  | TCAAGGGTATGC      |
| SRR517002.90607223.1+  | TCAAGGGTATGC      |
| SRR511911.40076074.2-  | TCAAGGGTATGCT     |
| SRR516978.4630760.1+   | TCAAGGGTATGCT     |
| SRR516986.15967055.2-  | TCAAGGGTATGCT     |
| SRR516991.70672748.1-  | TCAAGGGTATGCT     |
| SRR516996.66223613.1+  | TCAAGGGTATGCT     |
| SRR516999.3393409.2-   | TCAAGGGTATGCT     |
| SRR516999.78625944.1+  | TCAAGGGGATGCT     |
| SRR517005.73305592.2-  | TCAAGGGTATGCT     |
| SRR516977.50923694.1-  | TCAAGGGTATGCTC    |
| SRR516979.43816476.2+  | TCAAGGGGCTGCTC    |
| SRR516980.7236138.2-   | TCAAGGGTATGCTCT   |
| SRR516987.79339821.1-  | TCAAGGGTATGCTCT   |
| SRR516993.33273789.1-  | TCAAGGGTATGCTCT   |
| SRR516996.76179188.2+  | TCAAGGGGATGCTCT   |
| SRR516998.88264383.1+  | TCCAGGGGATGCTCT   |
| SRR517001.87930230.1-  | TCAAGGGTATGCTCT   |
| SRR517009.19677786.1-  | TCAAGGGTATGCTCT   |
| SRR511912.4156394.1-   | TCAAGGGTATGCTCTT  |
| SRR516972.51498046.1-  | TCAAGGGTATGCTCTT  |
| SRR516975.9441702.2-   | TCAAGGGTATGCTCTT  |
| SRR516981.76497254.2-  | TCAAGGGTATGCTCTT  |
| SRR517005.61532069.2-  | TCAAGGGTATGCTCTT  |
| SRR517005.7777984.1+   | TCAAGGGGATGCTCTT  |
| SRR517008.41558359.1+  | TCAAGGGTATGCTCTT  |
| SRR517009.26922977.2+  | TCAAGGGGATGCTCTT  |
| SRR511913.20668125.2-  | TCAAGGGTATGCTCTTC |
| SRR511914.65840186.2-  | TCAAGGGTATGCTCTTC |

SRR516972.67844320.1- TCAAGGGTATGCTCTTC  
SRR516977.73763692.1- TCAAGGGTATGCTCTTC  
SRR516980.57095254.1+ TCAAGGGGATGCTCTTT  
SRR516986.14794457.1+ TCAAGGGTATGCTCTTC  
SRR516991.3697767.1+ TCAAGGGGATGCTCTTC  
SRR516995.17755192.1+ TCAAGGGCATGCTCTTC  
SRR516995.83414144.2- TCAAGGGTATGCTCTTC  
SRR516999.44920014.1+ TCAAGGGTATGGTCTTT  
SRR516999.4718727.1+ TCAAGGGGATGCTCTTC  
SRR517002.31507094.2- TCAAGGGTATGCTCTTC  
SRR511913.52001769.2- TCAAGGGTATGCTCTTCC  
SRR517003.39098715.2- TCAAGGGTATGCTCTTCC  
SRR516971.5736893.1- TCAAGGGTATGCTCTTCC  
SRR516974.47709711.1+ TCAAGGGGATGCTCTTCC  
SRR516979.11039952.1- TCAAGGGTATGCTCTTCC  
SRR516979.45053249.1- TCAAGGGTATGCTCTTCC  
SRR516999.100313301.1+ TCAAGGGTATGCTCTTCC  
SRR511916.28951157.1+ TCAAGGGTATGCTCTTCC  
SRR511917.39957849.1+ TCAAGGGTATGCTCTTCC  
SRR516993.77596703.1+ TCAAGGGTATGCTCTTCC  
SRR516996.52401398.1+ TCAAGGGTATGCTCTTCC  
SRR511915.2956436.1- TCAAGGGTATGCTCTTCC  
SRR511915.2956742.1- TCAAGGGTATGCTCTTCC  
SRR516983.19283942.1+ TCAAGGGGATGCTCTTCC  
SRR516997.4512656.1- TCAAGGGTATGCTCTTCC  
SRR511912.1014472.1- TCAAGGGTATGCTCTTCC  
SRR516967.94416127.2+ TCAAGGGTATGCTCTTCC  
SRR516974.36849866.2- TCAAGGGTATGCTCTTCC  
SRR516979.16080749.1+ TCAAGGGTATGCTCTTCC  
SRR516980.8816673.2- TCAAGGGTATGCTCTTCC  
SRR516981.35677677.2- TCAAGGGTATGCTCTTCC  
SRR516986.21413362.2+ TCAAGGGTATGCTCTTCC  
SRR516986.37049200.1- TCAAGGGTATGCTCTTCC  
SRR516995.87128240.2- TCAAGGGTATGCTCTTCC  
SRR516998.28200586.2- TCAAGGGTATGCTCTTCC  
SRR516999.92446757.1- TCAAGGGTATGCTCTTCC  
SRR517002.97801972.1- TCAAGGGTATGCTCTTCC  
SRR517003.21132339.1- TCAAGGGTATGCTCTTCC  
SRR517004.51768700.2- TCAAGGGTATGCTCTTCC  
SRR517007.8592877.1- TCAAGGGTATGCTCTTCC  
SRR511911.29686714.2- TCAAGGGTATGCTCTTCC  
SRR511911.37480006.2- TCAAGGGTATGCTCTTCC  
SRR511915.46810937.2+ TCAAGGGTATGCTCTTCC  
SRR516968.115657864.2- TCAAGGGTATGCTCTTCC  
SRR516973.50577545.1+ TCAAGGGTAAGCTCTTCC  
SRR516976.12707927.1+ TCAAGGGGATGCTCTTCC  
SRR516998.53967676.2- TCAAGGGTATGCTCTTCC  
SRR516978.20535847.2- TCAAGGGTATGCTCTTCC  
SRR516999.39456345.2- TCAAGGGTATGCTCTTCC  
SRR517007.68739089.1+ TCAAGGGGATGCTCTTCC  
SRR517008.75782648.1- TCAAGGGTATGCTCTTCC  
SRR511913.1169864.1+ TCAAGGGTATGGTCTTCC  
SRR511913.18852311.1- TCAAGGGTATGCTCTTCC  
SRR516967.146282791.1- TCAAGGGTACGCTCTTCC  
SRR516971.1110705.2+ TCAAGGGTATGCTCTTCC  
SRR516973.17477597.1- TCAAGGGTATGCTCTTCC  
SRR516973.19946759.2- TCAAGGGTATGCTCTTCC  
SRR516974.72485008.1- TCAAGGGTATGCTCTTCC  
SRR516979.5438653.1+ TCAAGGGTATGCTCTTCC  
SRR516982.31349844.1- TCAAGGGTATGCTCTTCC  
SRR516991.89333198.1+ TCAAGGGGATGCTCTTCC  
SRR517000.36678948.1+ TCAAGGGGATGCTCTTCC  
SRR517001.63940723.2+ TCCAGGGTATGCTCTTCC  
SRR517004.42185234.1- TCAAGGGTATGCTCTTCC  
SRR517009.7493725.1- TCAAGGGTATGCTCTTCC  
SRR511911.45670450.2- TCAAGGGTATGCTCTTCC  
SRR516972.58439524.1- TCAAGGGTATGCTCTTCC  
SRR516978.48507581.2+ TCAAGGGTATGCTCTTCC  
SRR516981.23321590.2- TCAAGGGTATGCTCTTCC  
SRR516984.23515395.1+ TCAAGGGTATGCTCTTCC  
SRR516995.41614722.2- TCAAGGGTATGCTCTTCC  
SRR517004.23920483.1+ TCAAGGGGATGCTCTTCC  
SRR511892.31593589.1- TCAAGGGTATGCTCTTCC  
SRR516968.118272353.2+ TCAAGGGTATGCTCTTCC  
SRR516970.7640225.2+ TCAAGGGTATGCTCTTCC  
SRR516986.24103450.2- TCAAGGGTATGCTCTTCC  
SRR516989.22778442.2+ TCAAGGGTATGCTCTTCC  
SRR517000.54991829.2+ TCAAGGGCATGCTCTTCC  
SRR517009.26982378.2+ TCAAGGGGATGCTCTTCC  
SRR511912.20631234.2- TCAAGGGTATGCTCTTCC  
SRR516973.52994151.1- TCAAGGGTATGCTCTTCC  
SRR516981.26964373.2+ TCAAGGGTATGCTCTTCC  
SRR516985.219617.1+ TCAAGGGGATGGTCTTCC  
SRR516989.44612348.1- TCAAGGGTATGCTCTTCC

SRR517008.63631025.2- TCAAGGGTATGCTCTTCCTCTTGCTCCTC  
SRR516974.42555202.2+ TCAAGGGGATGCTCTTCCTCTTGCTCCTCC  
SRR516990.40763061.2+ TCAAGGGGATGCTCTTCCTCTTGCTCCTCC  
SRR516994.27805045.1- TCAAGGGTATGCTCTTCCTCTTGCTCCTCC  
SRR516997.55886851.2- TCAAGGGTATGCTCTTCCTCTTGCTCCTCC  
SRR516997.58614765.1+ TCAAGGGTATGCTCTTTCTCTTTCTCCTCC  
SRR516998.100156656.1+ TCAAGGGGATGCTCTTCCTCTTGCTCCTCC  
SRR516999.5917.1+ TCAAGGGGATGCTCTTCCTCTTGCTCCTCC  
SRR511916.51401451.2- TCAAGGGTATGCTCTTCCTCTTGCTCCTCCC  
SRR516974.1040705.1+ TCAAGGGGATGCTCTTCCTCTTGCTCTCCTCC  
SRR517000.66457751.1+ TCAAGGGTATGCTCTTCCTCTTGCTCCTCCC  
SRR517002.10945551.1- TCAAGGGTATGCTCTTCCTCTTGCTCCTCCC  
SRR511911.17781748.1- TCAAGGGTATGCTCTTCCTCTTGCTCCTCCCA  
SRR516975.4624241.1+ TCAAGGGTATGCTCTTCCTCTTGCTCCTCCCA  
SRR516987.76366948.2- TCAAGGGTATGCTCTTCCTCTTGCTCCTCCCA  
SRR516990.64951029.2+ TCAAGGGTATGCTCTTCCTCTTGCTCCTCCCA  
SRR516993.11025707.2- TCAAGGGTATGCTCTTCCTCTTGCTCCTCCCA  
SRR516998.78835527.1+ TCAAGGGTATGCTCTTCCTCTTGCTCCTCCCA  
SRR516998.83658111.2+ TCAAGGGTATGCTCTTCCTCTTGCTCCTCCCA  
SRR517000.39640223.2+ TCAAGGGTATGCTCTTCCTCTTGCTCCTCCCA  
SRR517002.44210664.1- TCAAGGGTATGCTCTTCCTCTTGCTCCTCCCA  
SRR517002.50187769.1+ TCAAGGGGATGCTCTTCCTCTTGCTCCTCCC  
SRR511911.71659560.2+ TCAAGGGTATGCTCTTCCTCTTGCTCCTCCCCT  
SRR511913.8247697.2+ TCAAGGGTATGCTCTTCCTCTTGCTCCTCCCCT  
SRR516974.46565740.2- TCAAGGGTATGCTCTTCCTCTTGCTCCTCCCAT  
SRR516978.52604776.1- TCAAGGGTATGCTCTTCCTCTTGCTCCTCCCAT  
SRR516985.4837674.2+ TCTAGGGGAAGCTCTTCCTCTTGCTCCTTCCCCT  
SRR511912.72370488.2+ TCAAGGGGATGCTCTTCCTCTTGCTCCTCCCCTC  
SRR516978.38239451.2- TCAAGGGTATGCTCTTCCTCTTGCTCCTCCCATA  
SRR516991.87080495.1- TCAAGGGTATGCTCTTCCTCTTGCTCCTCCCATA  
SRR516999.14760583.2- TCAAGGGTATGCTCTTCCTCTTGCTCCTCCCATA  
SRR517008.76003299.2- TCAAGGGTATGCTCTTCCTCTTGCTCCTCCCATA  
SRR511917.2380844.2- TCAAGGGTATGCTCTTCCTCTTGCTCCTCCCATA  
SRR511917.9454744.2- TCAAGGGTATGCTCTTCCTCTTGCTCCTCCCATA  
SRR511917.9454874.2- TCAAGGGTATGCTCTTCCTCTTGCTCCTCCCATA  
SRR516967.54383831.1- TCAAGGGTATGCTCTTCCTCTTGCTCCTCCCATA  
SRR516973.60429677.2+ TCAAGGGGATGCTCTTCCTCTTGCTCCTCCCCTAC  
SRR516978.14537581.1+ TCAAGGGGATGCTCTTCCTCTTGCTCCTCCCCTAC  
SRR516980.14193627.1+ TCAAGGGGATGCTCTTCCTCTTGCTCCTCCCATA  
SRR516987.56665405.2+ TCAAGGGTATGCTCTTCCTCTTGCTCCTCCCATA  
SRR516993.66881456.2+ TCAAGGGTATGCTCTTCCTCTTGCTCCTCCCATA  
SRR517000.5336928.1- TCAAGGGTATGCTCTTCCTCTTGCTCCTCCCATA  
SRR511892.45941781.1+ TCAAGGGTATGCTCTTCCTCTTGCTCCTCCCCTACT  
SRR516968.140796502.2+ TCAAGGGTATGCTCTTCCTCTTGCTCCTCCCCTACT  
SRR516983.47760221.1- TCAAGGGTATGCTCTTCCTCTTGCTCCTCCATACT  
SRR516992.6818043.1- TCAAGGGTATGCTCTTCCTCTTGCTCCTCCCATACT  
SRR516994.75464207.2+ TCAAGGGTATGCTCTTCCTCTTGCTCCTCCCCTACT  
SRR516996.89309997.1+ TCAAGGGTATGCTCTTCCTCTTGCTCCTCCCCTACT  
SRR516979.60567804.1+ TCAAGGGTATGCTCTTCCTCTTGCTCCTCCCCTACTT  
SRR516990.13785933.1- TCAAGGGTATGCTCTTCCTCTTGCTCCTCCCATACTT  
SRR516990.60703481.2- TCAAGGGTATGCTCTTCCTCTTGCTCCTCCCATACTT  
SRR517008.30257719.1+ TCAAGGGTATGCTCTTCCTCTTGCTCCTCCCCTACTT  
SRR511914.68007108.2- TCAAGGGTATGCTCTTCCTCTTGCTCCTCCCATACTTT  
SRR511915.67432792.1+ TCAAGGGGATGCTCTTCCTCTTGCTCCTCCCATACTTT  
SRR516976.70234108.2- TCAAGGGTATGCTCTTCCTCTTGCTCCTCCCATACTTT  
SRR516977.47216005.2+ TCAAGGGGATGCTCTTCCTCTTGCTCCTCCCATACTTT  
SRR516984.23605175.2+ TCAAGGGTATGCTCTTCCTCTTGCTCCTCCCATACTTT  
SRR516987.1841637.2- TCAAGGGTATGCTCTTCCTCTTGCTCCTCCCATACTTT  
SRR517006.41660503.1- TCAAGGGTATGCTCTTCCTCTTGCTCCTCCCATACTTT  
SRR511912.19294174.1+ TCAAGGGGATGCTCTTCCTCTTGCTCCTCCCATAAATTTT  
SRR511912.19294330.1+ TCAAGGGGATGCTCTTCCTCTTGCTCCTCCCCTACTTTT  
SRR516972.58990870.1- TCAAGGGTATGCTCTTCCTCTTGCTCCTCCCATACTTTT  
SRR516975.45005523.1- TCAAGGGTATGCTCTTCCTCTTGCTCCTCCCATACTTTT  
SRR516977.70276963.1+ TCAAGGGTATGCTCTTCCTCTTGCTCCTCCCATACTTTT  
SRR517004.33967467.1+ TCAAGGGTATGCTCTTCCTCTTGCTCCTCCCATACTTTT  
SRR517007.68737803.1- TCAAGGGTATGCTCTTCCTCTTGCTCCTCCCATACTTTT  
SRR511892.68477751.1- TCAAGGGTATGCTCTTCCTCTTGCTCCTCCCATACTTTTG  
SRR516973.18821850.2- TCAAGGGTATGCTCTTCCTCTTGCTCCTCCCATACTTTTG  
SRR516973.18821853.2- TCAAGGGTATGCTCTTCCTCTTGCTCCTCCCATACTTTTG  
SRR516973.42617646.2- TCAAGGGTATGCTCTTCCTCTTGCTCCTCCCATACTTTTG  
SRR516974.6201811.2+ TCAAGGGGATGCTCTTCCTCTTGCTCCTCCCATACTTTTG  
SRR516999.97278751.1+ TCAAGGGGATGCTCTTCCTCTTGCTCCTCCCATACTTTTG  
SRR516967.14759904.2+ TCAAGGGTATGCTCTTCCTCTTGCTCCTCCCATACTTTTGT  
SRR517008.5489452.2- TCAAGGGTATGCTCTTCCTCTTGCTCCTCCCATACTTTTGT  
SRR516972.57623491.1- TCAAGGGTATGCTCTTCCTCTTGCTCCTCCCATACTTTTGT  
SRR516975.29785312.1- TCAAGGGTATGCTCTTCCTCTTGCTCCTCCCATACTTTTGT  
SRR516981.43595596.1- TCAAGGGTATGCTCTTCCTCTTGCTCCTCCCATACTTTTGT  
SRR516983.13010793.1- TCAAGGGTATGCTCTTCCTCTTGCTCCTCCCATACTTTTGT  
SRR516989.66572423.2+ TCAAGGGTATGCTCTTCCTCTTGCTCCTCCCATACTTTTGT  
SRR516999.1552100.2- TCAAGGGTATGCTCTTCCTCTTGCTCCTCCCATACTTTTGT  
SRR517005.67585549.2- TCAAGGGTATGCTCTTCCTCTTGCTCCTCCCATACTTTTGT  
SRR511914.19951607.1- TCAAGGGTATGCTCTTCCTCTTGCTCCTCCCATACTTTTGT  
SRR516969.9631131.1+ TCAAGGGTATGCTCTTCCTCTTGCTCCTCCCATACTTTTGT  
SRR516975.41855794.2+ TCAAGGGTATGCTCTTCCTCTTGCTCCTCCCATACTTTTGT

SRR516986.39849151.2- TCAAGGGTATGCTCTTCCTCTTGCTCCTCCCATACCTTTTGTTT  
SRR517000.91150091.2+ TCAAGGGTATGCTCTTCCTCTTGCTCCTCCCATACCTTTTGTTT  
SRR517004.53237476.2+ TCAAGGGTATGCTCTTCCTCTTGCTCCTCCCATACCTTTTGTTT  
SRR517005.54024085.1- TCAAGGGTATGCTCTTCCTCTTGCTCCTCCCATACCTTTTGTTT  
SRR516967.129799720.1- TCAAGGGTATGCTCTTCCTCTTGCTCCTCCCATACCTTTTGTTT  
SRR516984.75040283.2- TCAAGGGTATGCTCTTCCTCTTGCTCCTCCCATACCTTTTGTTT  
SRR516990.22073434.1- TCAAGGGTATGCTCTTCCTCTTGCTCCTCCCATACCTTTTGTTT  
SRR516995.43463521.1- TCAAGGGTATGCTCTTCCTCTTGCTCCTCCCATACCTTTTGTTT  
SRR516997.21480163.2- TCAAGGGTATGCTCTTCCTCTTGCTCCTCCCATACCTTTTGTTT  
SRR516997.47194944.1- TCAAGGGTATGCTCTTCCTCTTGCTCCTCCCATACCTTTTGTTT  
SRR517006.12195593.1+ TCAAGGGGATGCTCTTCCTCTTGCTCCTCCCATACCTTTTGTTT  
SRR517009.52663891.2+ TCAAGGGTATGCTCTTCCTCTTGCTCCTCCCATACCTTTTGTTT  
SRR516975.25984190.1- TCAAGGGTATGCTCTTCCTCTTGCTCCTCCCATACCTTTTGTTT  
SRR516983.70623253.2- TCAAGGGTATGCTCTTCCTCTAGCTCCTCCCATACCTTTTGTTT  
SRR516989.30730922.2+ TCAAGGGTATGCTCTTCCTCTTGCTCCTCCCATACCTTTTGTTT  
SRR517003.23333068.2- TCAAGGGTATGCTCTTCCTCTTGCTCCTCCCATACCTTTTGTTT  
SRR517006.80972378.1- TCAAGGGTATGCTCTTCCTCTTGCTCCTCCCATACCTTTTGTTT  
SRR511892.53930910.2+ TCAAGGGTATGCTCTTCCTCTTGCTCCTCCCATACCTTTTGTTT  
SRR511911.45879133.1+ TCAAGGGTATGCTCTTCCTCTTGCTCCTCCCATACCTTTTGTTT  
SRR516967.102120548.1- TCAAGGGTATGCTCTTCCTCTTGCTCCTCCCATACCTTTTGTTT  
SRR516967.59801249.2- TCAAGGGTATGCTCTTCCTCTTGCTCCTCCCATACCTTTTGTTT  
SRR516974.33490101.2+ TCCAGGGTATGCTCTTCCTCTTGCTCCTCCCATACCTTTTGTTT  
SRR516977.1264704.2- TCAAGGGTATGCTCTTCCTCTTGCTCCTCCCATACCTTTTGTTT  
SRR516985.95116448.1- TCAAGGGTATGCTCTTCCTCTTGCTCCTCCCATACCTTTTGTTT  
SRR516991.27367214.1+ TCAAGGGTATGCTCTTCCTCTTGCTCCTCCCATACCTTTTGTTT  
SRR516998.88169944.2+ TCAAGGGTATGCTCTTCCTCTTGCTCCTCCCATACCTTTTGTTT  
SRR516999.94992807.1+ TCAAGGGTATGCTCTTCCTCTTGCTCCTCCCATACCTTTTGTTT  
SRR511915.10990174.2- TCAAGGGTATGCTCTTCCTCTTGCTCCTCCCATACCTTTTGTTT  
SRR511915.2718704.2+ TCAAGGGTATGCTCTTCCTCTTGCTCCTCCCATACCTTTTGTTT  
SRR517001.52537783.2+ TCAAGGGTATGCTCTTCCTCTTGCTCCTCCCATACCTTTTGTTT  
SRR511892.22460703.1+ TCAAGGGTATGCTCTTCCTCTTGCTCCTCCCATACCTTTTGTTT  
SRR516972.87344728.1+ TCAAGGGGATGCTCTTCCTCTTGCTCCTCCCATACCTTTTGTTT  
SRR516984.84534820.2+ TCAAGGGTATGCTCTTCCTCTTGCTCCTCCCATACCTTTTGTTT  
SRR516967.118206337.1- TCAAGGGTATGCTCTTCCTCTTGCTCCTCCCATACCTTTTGTTT  
SRR516980.39425242.2- TCAAGGGTATGCTCTTCCTCTTGCTCCTCCCATACCTTTTGTTT  
SRR516991.44566949.1+ TCAAGGGTATGCTCTTCCTCTTGCTCCTCCCATACCTTTTGTTT  
SRR516999.92033228.2- TCAAGGGTATGCTCTTCCTCTTGCTCCTCCCATACCTTTTGTTT  
SRR517003.11858841.1+ TCAAGGGTATGCTCTTCCTCTTGCTCCTCCCATACCTTTTGTTT  
SRR517008.88421506.1+ TCAAGGGTATGCTCTTCCTCTTGCTCCTCCCATACCTTTTGTTT  
SRR516973.36002427.1+ TCAAGGGTATGCTCTTCCTCTTGCTCCTCCCATACCTTTTGTTT  
SRR516991.36445672.2+ TCAAGGGGATGCTCTTCCTCTTGCCCTCCCATACCTTTTGTTT  
SRR517009.56817958.1- TCAAGGGTATGCTCTTCCTCTTGCTCCTCCCATACCTTTTGTTT  
SRR511912.61545448.1+ TCAAGGGTATGCTCTTCCTCTTGCTCCTCCCATACCTTTTGTTT  
SRR511912.74095538.1- TCAAGGGTATGCTCTTCCTCTTGCTCCTCCCATACCTTTTGTTT  
SRR516967.132651451.2+ TCAAGGGTATGCTCTTCCTCTTGCTCCTCCCATACCTTTTGTTT  
SRR516967.94039320.2+ TCAAGGGTATGCTCTTCCTCTTGCTCCTCCCATACCTTTTGTTT  
SRR516969.22222210.2- TCAAGGGTATGCTCTTCCTCTTGCTCCTCCCATACCTTTTGTTT  
SRR516986.15638143.1- TCAAGGGTATGCTCTTCCTCTTGCTCCTCCCATACCTTTTGTTT  
SRR516994.22414233.2+ TCAAGGGTATGCTCTTCCTCTTGCTCCTCCCATACCTTTTGTTT  
SRR517001.66298626.2+ TCAAGGGTATGCTCTTCCTCTTGCTCCTCCCATACCTTTTGTTT  
SRR517008.59060241.2- TCAAGGGTATGCTCTTCCTCTTGCTCCTCCCATACCTTTTGTTT  
SRR516974.47716003.1+ TCAAGGGTATGCTCTTCCTCTTGCTCCTCCCATACCTTTTGTTT  
SRR516975.13576344.2- TCAAGGGTATGCTCTTCCTCTTGCTCCTCCCATACCTTTTGTTT  
SRR516994.76783997.1- TCAAGGGTATGCTCTTCCTCTTGCTCCTCCCATACCTTTTGTTT  
SRR517005.62626634.1+ TCAAGGGTATGCTCTTCCTCTTGCTCCTCCCATACCTTTTGTTT  
SRR517006.45290877.1+ TCAAGGGTATGCTCTTCCTCTTGCTCCTCCCATACCTTTTGTTT  
SRR516967.149674807.1+ TCAAGGGTATGCTCTTCCTCTTGCTCCTCCCATACCTTTTGTTT  
SRR516970.30184580.1- TCAAGGGTATGCTCTTCCTCTTGCTCCTCCCATACCTTTTGTTT  
SRR516982.4572095.1- TCAAGGGTATGCTCTTCCTCTTGCTCCTCCCATACCTTTTGTTT  
SRR516985.37644018.1- TCAAGGGTATGCTCTTCCTCTTGCTCCTCCCATACCTTTTGTTT  
SRR516985.59438916.2- TCAAGGGTATGCTCTTCCTCTTGCTCCTCCCATACCTTTTGTTT  
SRR516988.29683805.2- TCAAGGGTATGCTCTTCCTCTTGCTCCTCCCATACCTTTTGTTT  
SRR516991.4931934.2- TCAAGGGTATGCTCTTCCTCTTGCTCCTCCCATACCTTTTGTTT  
SRR516998.32153278.1- TCAAGGGTATGCTCTTCCTCTTGCTCCTCCCATACCTTTTGTTT  
SRR516998.43339497.2- TCAAGGGTATGCTCTTCCTCTTGCTCCTCCCATACCTTTTGTTT  
SRR517006.89664623.2- TCAAGGGTATGCTCTTCCTCTTGCTCCTCCCATACCTTTTGTTT  
SRR516976.39031867.1+ TCAAGGGGATGCTCTTCCTCTTGCTCCTCCCATACCTTTTGTTT  
SRR516986.10018581.2- TCAAGGGTATGCTCTTCCTCTTGCTCCTCCCATACCTTTTGTTT  
SRR516994.61946968.1- TCAAGGGTATGCTCTTCCTCTTGCTCCTCCCATACCTTTTGTTT  
SRR517000.73288031.2- TCAAGGGTATGCTCTTCCTCTTGCTCCTCCCATACCTTTTGTTT  
SRR511913.45378464.2+ TCAAGGGGATGCTCTTCCTCTTGCTCCTCCCATACCTTTTGTTT  
SRR516968.40141403.2+ TCAAGGGTATGCTCTTCCTCTTGCTCCTCCCATACCTTTTGTTT  
SRR516969.13918852.2+ TCAAGGGGATGCTCTTCCTCTTGCTCCTCCCATACCTTTTGTTT  
SRR516971.6332637.2+ TCAAGGGTATGCTCTTCCTCTTGCTCCTCCCATACCTTTTGTTT  
SRR516998.76032854.1+ TCAAGGGTATGCTCTTCCTCTTGCTCCTCCCATACCTTTTGTTT  
SRR511911.73201164.1- TCAAGGGTATGCTCTTCCTCTTGCTCCTCCCATACCTTTTGTTT  
SRR516985.1366211.2+ TCAAGGGAATGCTCTTCCTCTTGCTCCTCCAGACTTTTGTTT  
SRR516989.14400971.1- TCAAGGGTATGCTCTTCCTCTTGCTCCTCCCATACCTTTTGTTT  
SRR516989.56753297.1+ TCAAGGGTATGCTCTTCCTCTTGCTCCTCCCATACCTTTTGTTT  
SRR516993.46849885.2- TCAAGGGTATGCTCTTCCTCTTGCTCCTCCCATACCTTTTGTTT  
SRR516995.55107914.1+ TCAAGGGTATGCTCTTCCTCTTGCTCCTCCCATACCTTTTGTTT  
SRR517006.56172332.1- TCAAGGGTATGCTCTTCCTCTTGCTCCTCCCATACCTTTTGTTT  
SRR516968.21564094.1+ TCAAGGGTATGCTCTTCCTCTTGCTCCTCCCATACCTTTTGTTT  
SRR516979.12930171.1- TCAAGGGTATGCTCTTCCTCTTGCTCCTCCCATACCTTTTGTTT

SRR516987.12110999.2- TCAAGGGTATGCTCTTCCTCTTGCTCCTCCCATACCTTTTGTTTTGGTCAGCCTGCAC  
SRR516989.7567542.2- TCAAGGGTATGCTCTTCCTCTTGCTCCTCCCATACCTTTTGTTTTGGTCAGCCTGCAC  
SRR516997.21795180.1- TCAAGGGTATGCTCTTCCTCTTGCTCCTCCCATACCTTTTGTTTTGGTCAGCCTGCAC  
SRR516999.38660980.2+ TCAAGGGTATGCTCTTCCTCTTGCTCCTCCCATACCTTTTGTTTTGGTCAGCCTGCAC  
SRR517002.85671319.1+ TCAAGGGTATGCTCTTCCTCTTGCTCCTCCCATACCTTTTGTTTTGGTCAGCCTGCAC  
SRR511915.2718550.2+ TCTAGGGTATGCTCCTCCTCTTGCTCCTCCCATACCTTTTGTTTTGGTCAGCCTGCAC  
SRR516967.138148601.2+ TCAAGGGTATGCTCTTCCTCTTGCTCCTCCCATACCTTTTGTTTTGGTCAGCCTGCAC  
SRR516969.34784658.2- TCAAGGGTATGCTCTTCCTCTTGCTCCTCCCATACCTTTTGTTTTGGTCAGCCTGCAC  
SRR516973.1546854.2- TCAAGGGTATGCTCTTCCTCTTGCTCCTCCCATACCTTTTGTTTTGGTCAGCCTGCAC  
SRR516979.61078971.2+ TCAAGGGTATGCTCTTCCTCTTGCTCCTCCCATACCTTTTGTTTTGGTCAGCCTGCAC  
SRR517005.77446950.2+ TCAAGGGTATGCTCTTCCTCTTGCTCCTCCCATACCTTTTGTTTTGGTCAGCCTGCAC  
SRR517007.27729441.2+ TCAAGGGTATGCTCTTCCTCTTGCTCCTCCCATACCTTTTGTTTTGGTCAGCCTGCAC  
SRR511911.13404865.2+ TCAAGGGTATGCTCTTCCTCTTGCTCCTCCCATACCTTTTGTTTTGGTCAGCCTGCACCT  
SRR516967.121342033.1- TCAAGGGTATGCTCTTCCTCTTGCTCCTCCCATACCTTTTGTTTTGGTCAGCCTGCACCT  
SRR517004.18234910.1- TCAAGGGTATGCTCTTCCTCTTGCTCCTCCCATACCTTTTGTTTTGGTCAGCCTGCACCT  
SRR517004.23357618.2- TCAAGGGTATGCTCTTCCTCTTGCTCCTCCCATACCTTTTGTTTTGGTCAGCCTGCACCT  
SRR517009.46479798.1+ TCAAGGGTATGCTCTTCCTCTTGCTCCTCCCATACCTTTTGTTTTGGTCAGCCTGCACCT  
SRR511892.27528962.1- TCAAGGGTATGCTCTTCCTCTTGCTCCTCCCATACCTTTTGTTTTGGTCAGCCTGCACCTT  
SRR511892.28500594.1+ TCAAGGGGATGCTCTTCCTCTTGCTCCTCCCATACCTTTTGTTTTGGTCAGCCTGCACCT  
SRR511892.35285726.2+ TCAAGGGTATGCTCTTCCTCTTGCTCCTCCCATACCTTTTGTTTTGGTCAGCCTGCACCT  
SRR511911.14454908.2+ TCAAGGGTATGCTCTTCCTCTTGCTCCTCCCATACCTTTTGTTTTGGTCAGCCTGCACCT  
SRR511911.24447502.2- TCAAGGGTATGCTCTTCCTCTTGCTCCTCCCATACCTTTTGTTTTGGTCAGCCTGCACCT  
SRR511911.2560931.2- TCAAGGGTATGCTCTTCCTCTTGCTCCTCCCATACCTTTTGTTTTGGTCAGCCTGCACCT  
SRR511911.48293933.1+ TCAAGGGTATGCTCTTCCTCTTGCTCCTCCCATACCTTTTGTTTTGGTCAGCCTGCACCT  
SRR511911.53964321.2+ TCAAGGGTATGCTCTTCCTCTTGCTCCTCCCATACCTTTTGTTTTGGTCAGCCTGCACCT  
SRR511911.61131441.2- TCAAGGGTATGCTCTTCCTCTTGCTCCTCCCATACCTTTTGTTTTGGTCAGCCTGCACCT  
SRR511912.16411003.2- TCAAGGGTATGCTCTTCCTCTTGCTCCTCCCATACCTTTTGTTTTGGTCAGCCTGCACCT  
SRR511912.9044568.1+ TCAAGGGTATGCTCTTCCTCTTGCTCCTCCCATACCTTTTGTTTTGGTCAGCCTGCACCT  
SRR511913.41367866.2+ TCAAGGGTATGCTCTTCCTCTTGCTCCTCCCATACCTTTTGTTTTGGTCAGCCTGCACCT  
SRR511913.5222172.1- TCAAGGGTATGCTCTTCCTCTTGCTCCTCCCATACCTTTTGTTTTGGTCAGCCTGCACCT  
SRR511914.17741304.2+ TCAAGGGGATGCTCTTCCTCTTGCTCCTCCCATACCTTTTGTTTTGGTCAGCCTGCACCT  
SRR511914.39483852.2+ TCAAGGGTATGCTCTTCCTCTTGCTCCTCCCATACCTTTTGTTTTGGTCAGCCTGCACCT  
SRR511914.43073009.1+ TCAAGGGTATGCTCTTCCTCTTGCTCCTCCCATACCTTTTGTTTTGGTCAGCCTGCACCT  
SRR511914.44813836.2+ TCAAGGGTATGCTCTTCCTCTTGCTCCTCCCATACCTTTTGTTTTGGTCAGCCTGCACCT  
SRR511914.75736196.2+ TCAAGGGTATGCTCTTCCTCTTGCTCCTCCCATACCTTTTGTTTTGGTCAGCCTGCACCT  
SRR511914.83943589.1- TCAAGGGTATGCTCTTCCTCTTGCTCCTCCCATACCTTTTGTTTTGGTCAGCCTGCACCT  
SRR511914.85292277.1+ TCAAGGGTATGCTCTTCCTCTTGCTCCTCCCATACCTTTTGTTTTGGTCAGCCTGCACCT  
SRR511915.12387403.1+ TCAAGGGTATGCTCTTCCTCTTGCTCCTCCCATACCTTTTGTTTTGGTCAGCCTGCACCT  
SRR511915.2208112.2- TCAAGGGTATGCTCTTCCTCTTGCTCCTCCCATACCTTTTGTTTTGGTCAGCCTGCACCT  
SRR511915.2208399.2- TCAAGGGTATGCTCTTCCTCTTGCTCCTCCCATACCTTTTGTTTTGGTCAGCCTGCACCT  
SRR511915.50178675.2- TCAAGGGTATGCTCTTCCTCTTGCTCCTCCCATACCTTTTGTTTTGGTCAGCCTGCACCT  
SRR511915.68961737.2+ TCAAGGGTATGCTCTTCCTCTTGCTCCTCCCATACCTTTTGTTTTGGTCAGCCTGCACCT  
SRR511915.72842805.1+ TCAAGGGTATGCTCTTCCTCTTGCTCCTCCCATACCTTTTGTTTTGGTCAGCCTGCACCT  
SRR516967.114035844.1+ TCAAGGGTATGCTCTTCCTCTTGCTCCTCCCATACCTTTTGTTTTGGTCAGCCTGCACCT  
SRR516967.119505550.2- TCAAGGGTATGCTCTTCCTCTTGCTCCTCCCATACCTTTTGTTTTGGTCAGCCTGCACCT  
SRR516967.128996446.2+ TCAAGGGTATGCTCTTCCTCTTGCTCCTCCCATACCTTTTGTTTTGGTCAGCCTGCACCT  
SRR516967.140688955.1+ TCAAGGGTATGCTCTTCCTCTTGCTCCTCCCATACCTTTTGTTTTGGTCAGCCTGCACCT  
SRR516967.143090323.1- TCAAGGGTATGCTCTTCCTCTTGCTCCTCCCATACCTTTTGTTTTGGTCAGCCTGCACCT  
SRR516967.22260303.1+ TCAAGGGTATGCTCTTCCTCTTGCTCCTCCCATACCTTTTGTTTTGGTCAGCCTGCACCT  
SRR516967.23066803.1+ TCAAGGGTATGCTCTTCCTCTTGCTCCTCCCATACCTTTTGTTTTGGTCAGCCTGCACCT  
SRR516967.25613572.1- TCAAGGGTATGCTCTTCCTCTTGCTCCTCCCATACCTTTTGTTTTGGTCAGCCTGCACCT  
SRR516967.30937619.1+ TCAAGGGTATGCTCTTCCTCTTGCTCCTCCCATACCTTTTGTTTTGGTCAGCCTGCACCT  
SRR516967.3860522.2+ TCAAGGGTATGCTCTTCCTCTTGCTCCTCCCATACCTTTTGTTTTGGTCAGCCTGCACCT  
SRR516967.41353207.1- TCAAGGGTATGCTCTTCCTCTTGCTCCTCCCATACCTTTTGTTTTGGTCAGCCTGCACCT  
SRR516967.71626809.2+ TCANGGGTATGCTCTTCCTCTTGCTCCTCCCATACCTTTTGTTTTGGTCAGCCTGCACCT  
SRR516967.72187734.1+ TCAAGGGTATGCTCTTCCTCTTGCTCCTCCCATACCTTTTGTTTTGGTCAGCCTGCACCT  
SRR516967.88384226.2+ TCAAGGGTATGCTCTTCCTCTTGCTCCTCCCATACCTTTTGTTTTGGTCAGCCTGCACCT  
SRR516967.99920687.2- TCAAGGGTATGCTCTTCCTCTTGCTCCTCCCATACCTTTTGTTTTGGTCAGCCTGCACCT  
SRR516968.108115361.1+ TCAAGGGTATGCTCTTCCTCTTGCTCCTCCCATACCTTTTGTTTTGGTCAGCCTGCACCT  
SRR516968.111104702.2- TCAAGGGTATGCTCTTCCTCTTGCTCCTCCCATACCTTTTGTTTTGGTCAGCCTGCACCT  
SRR516968.114845186.2- TCAAGGGTATGCTCTTCCTCTTGCTCCTCCCATACCTTTTGTTTTGGTCAGCCTGCACCT  
SRR516968.128087344.1+ TCAAGGGTATGCTCTTCCTCTTGCTCCTCCCATACCTTTTGTTTTGGTCAGCCTGCACCT  
SRR516968.155018007.1- TCAAGGGTATGCTCTTCCTCTTGCTCCTCCCATACCTTTTGTTTTGGTCAGCCTGCACCT  
SRR516968.165290408.2- TCAAGGGTATGCTCTTCCTCTTGCTCCTCCCATACCTTTTGTTTTGGTCAGCCTGCACCT  
SRR516968.31712935.1- TCAAGGGTATGCTCTTCCTCTTGCTCCTCCCATACCTTTTGTTTTGGTCAGCCTGCACCT  
SRR516968.37738736.1- TCAAGGGTATGCTCTTCCTCTTGCTCCTCCCATACCTTTTGTTTTGGTCAGCCTGCACCT  
SRR516968.53031658.1+ TCAAGGGTATGCTCTTCCTCTTGCTCCTCCCATACCTTTTGTTTTGGTCAGCCTGCACCT  
SRR516968.73747636.2+ TCAAGGGTATGCTCTTCCTCTTGCTCCTCCCATACCTTTTGTTTTGGTCAGCCTGCACCT  
SRR516968.75435688.2+ TCAAGGGTATGCTCTTCCTCTTGCTCCTCCCATACCTTTTGTTTTGGTCAGCCTGCACCT  
SRR516968.80862039.2- TCAAGGGTCTGCTCTTCCTCTTGCTCCTCCCATACCTTTTGTTTTGGTCAGCCTGCACCT  
SRR516969.1709162.1- TCAAGGGTATGCTCTTCCTCTTGCTCCTCCCATACCTTTTGTTTTGGTCAGCCTGCACCT  
SRR516969.1737591.2+ TCAAGGGGATGCTCTTCCTCTTGCTCCTCCCATACCTTTTGTTTTGGTCAGCCTGCACCT  
SRR516969.33135240.1+ TCAAGGGTATGCTCTTCCTCTTGCTCCTCCCATACCTTTTGTTTTGGTCAGCCTGCACCT  
SRR516969.867824.1+ TCAAGGGTATGCTCTTCCTCTTGCTCCTCCCATACCTTTTGTTTTGGTCAGCCTGCACCT  
SRR516970.17885639.1- TCAAGGGTATGCTCTTCCTCTTGCTCCTCCCATACCTTTTGTTTTGGTCAGCCTGCACCT  
SRR516970.26934.1+ TCAAGGGTATGCTCTTCCTCTTGCTCCTCCCATACCTTTTGTTTTGGTCAGCCTGCACCT  
SRR516970.33098467.1- TCAAGGGTATGCTCTTCCTCTTGCTCCTCCCATACCTTTTGTTTTGGTCAGCCTGCACCT  
SRR516970.33098640.1- TCAAGGGTATGCTCTTCCTCTTGCTCCTCCCATACCTTTTGTTTTGGTCAGCCTGCACCT  
SRR516970.37367691.1+ TCAAGGGTATGCTCTTCCTCTTGCTCCTCCCATACCTTTTGTTTTGGTCAGCCTGCACCT  
SRR516971.1738878.1- TCAAGGGTATGCTCTTCCTCTTGCTCCTCCCATACCTTTTGTTTTGGTCAGCCTGCACCT  
SRR516971.34030929.1- TCAAGGGTATGCTCTTCCTCTTGCTCCTCCCATACCTTTTGTTTTGGTCAGCCTGCACCT  
SRR516971.4236129.1- TCAAGGGTATGCTCTTCCTCTTGCTCCTCCCATACCTTTTGTTTTGGTCAGCCTGCACCT  
SRR516971.6695405.1+ TCAAGGGTATGCTCTTCCTCTTGCTCCTCCCATACCTTTTGTTTTGGTCAGCCTGCACCT  
SRR516971.7392543.1+ TCAAGGGTATGCTCTTCCTCTTGCTCCTCCCATACCTTTTGTTTTGGTCAGCCTGCACCT

SRR516972.30802147.2- TCAAGGGTATGCTCTTCCTCTTGCTCCTCCCATACCTTTTGTTTTGGTCAGCCTGCACCTT  
SRR516972.31320955.1+ TCAAGGGTATGCTCTTCCTCTTGCTCCTCCCATACCTTTTGTTTTGGGTCAGCCTGCACCTT  
SRR516972.48121654.2- TCAAGGGTATGCTCTTCCTCTTGCTCCTCCCATACCTTTTGTTTTGGTCAGCCTGCACCTT  
SRR516972.53472127.1- TCAAGGGTATGCTCTTCCTCTTGCTCCTCCCATACCTTTTGTTTTGGTCAGCCTGCACCTT  
SRR516972.60791475.1+ TCAAGGGTATGCTCTTCCTCTTGCTCCTCCCATACCTTTTGTTTTGGTCAGCCTGCACCTT  
SRR516972.67116381.2- TCAAGGGTATGCTCTTCCTCTTGCTCCTCCCATACCTTTTGTTTTGGTCAGCCTGCACCTT  
SRR516972.77543660.1+ TCAAGGGTATGCTCTTCCTCTTGCTCCTCCCATACCTTTTGTTTTGGTCAGCCTGCACCTT  
SRR516973.23808767.1- TCAAGGGTATGCTCTTCCTCTTGCTCCTCCCATACCTTTTGTTTTGGTCAGCCTGCACCTT  
SRR516973.23808771.1- TCAAGGGTATGCTCTTCCTCTTGCTCCTCCCATACCTTTTGTTTTGGTCAGCCTGCACCTT  
SRR516973.25479726.2+ TCAAGGGTATGCTCTTCCTCTTGCTCCTCCCATACCTTTTGTTTTGGTCAGCCTGCACCTT  
SRR516974.1759552.2+ TCAAGGGTATGCTCTTCCTCTTGCTCCTCCCATACCTTTTGTTTTGGTCAGCCTGCACCTT  
SRR516974.24221041.1- TCAAGGGTATGCTCTTCCTCTTGCTCCTCCCATACCTTTTGTTTTGGTCAGCCTGCACCTT  
SRR516974.24280528.2- TCAAGGGTATGCTCTTCCTCTTGCTCCTCCCATACCTTTTGTTTTGGTCAGCCTGCACCTT  
SRR516974.30867255.1+ TCCAGGGTATGCTCTTCCTCTTGCTCCTCCCATACCTTTTGTTTTGGTCAGCCTGCACCTT  
SRR516974.33187826.2- TCAAGGGTATGCTCTTCCTCTTGCTCCTCCCATACCTTTTGTTTTGGTCAGCCTGCACCTT  
SRR516974.48843984.2- TCAAGGGTATGCTCTTCCTCTTGCTCCTCCCATACCTTTTGTTTTGGTCAGCCTGCACCTT  
SRR516974.66712393.1+ TCAAGGGTATGCTCTTCCTCTTGCTCCTCCCATACCTTTTGTTTTGGTCAGCCTGCACCTT  
SRR516975.39272850.2- TCAAGGGTATGCTCTTCCTCTTGCTCCTCCCATACCTTTTGTTTTGGTCAGCCTGCACCTT  
SRR516975.51826312.2- TCAAGGGTATGCTCTTCCTCTTGCTCCTCCCATACCTTTTGTTTTGGTCAGCCTGCACCTT  
SRR516976.22199380.2+ TCAAGGGTATGCTCTTCCTCTTGCTACTCCCTACTTTTGTTTTGGTACGCTGCACCTT  
SRR516977.2738721.1- TCAAGGGTATGCTCTTCCTCTTGCTCCTCCCATACCTTTTGTTTTGGTCAGCCTGCACCTT  
SRR516977.3418701.1+ TCAAGGGTATGCTCTTCCTCTTGCTCCTCCCATACCTTTTGTTTTGGTCAGCCTGCACCTT  
SRR516977.65941636.2- TCAAGGGTATGCTCTTCCTCTTGCTCCTCCCATACCTTTTGTTTTGGTCAGCCTGCACCTT  
SRR516977.71210552.2- TCAAGGGTATGCTCTTCCTCTTGCTCCTCCCATACCTTTTGTTTTGGTCAGCCTGCACCTT  
SRR516978.14547831.1+ TCAAGGGTATGCTCTTCCTCTTGCTCCTCCCATACCTTTTGTTTTGGTCAGCCTGCACCTT  
SRR516978.44746730.2+ TCAAGGGTATGCTCTTCCTCTTGCTCCTCCCATACCTTTTGTTTTGGTCAGCCTGCACCTT  
SRR516978.55364120.2- TCAAGGGTATGCTCTTCCTCTTGCTCCTCCCATACCTTTTGTTTTGGTCAGCCTGCACCTT  
SRR516978.60261999.1- TCAAGGGTATGCTCTTCCTCTTGCTCCTCCCATACCTTTTGTTTTGGTCAGCCTGCACCTT  
SRR516978.69371288.1- TCAAGGGTATGCTCTTCCTCTTGCTCCTCCCATACCTTTTGTTTTGGTCAGCCTGCACCTT  
SRR516978.70829906.1+ TCAAGGGTATGCTCTTCCTCTTGCTCCTCCCATACCTTTTGTTTTGGTCAGCCTGCACCTT  
SRR516979.27449937.1+ TCAAGGGTATGCTCTTCCTCTTGCTCCTCCCATACCTTTTGTTTTGGTCAGCCTGCACCTT  
SRR516979.30065340.2+ TCAAGGGTATGCTCTTCCTCTTGCTCCTCCCATACCTTTTGTTTTGGTCAGCCTGCACCTT  
SRR516979.7087082.1- TCAAGGGTATGCTCTTCCTCTTGCTCCTCCCATACCTTTTGTTTTGGTCAGCCTGCACCTT  
SRR516980.49332165.2+ TCAAGGGTATGCTCTTCCTCTTGCTCCTCCCATACCTTTTGTTTTGGTCAGCCTGCACCTT  
SRR516981.16534572.1+ TCAAGGGTATGCTCTTCCTCTTGCTCCTCCCATACCTTTTGTTTTGGTCAGCCTGCACCTT  
SRR516981.26581776.2+ TCAAGGGTATGCTCTTCCTCTTGCTCCTCCCATACCTTTTGTTTTGGTCAGCCTGCACCTT  
SRR516981.34446750.1- TCAAGGGTATGCTCTTCCTCTTGCTCCTCCCATACCTTTTGTTTTGGTCAGCCTGCACCTT  
SRR516981.43172628.1- TCAAGGGTATGCTCTTCCTCTTGCTCCTCCCATACCTTTTGTTTTGGTCAGCCTGCACCTT  
SRR516981.56879022.2+ TCAAGGGTATGCTCTTCCTCTTGCTCCTCCCATACCTTTTGTTTTGGTCAGCCTGCACCTT  
SRR516981.69540153.2- TCAAGGGTATGCTCTTCCTCTTGCTCCTCCCATACCTTTTGTTTTGGTCAGCCTGCACCTT  
SRR516982.49581501.1- TCAAGGGTATGCTCTTCCTCTTGCTCCTCCCATACCTTTTGTTTTGGTCAGCCTGCACCTT  
SRR516983.18957782.2+ TCAAGGGGATGCTCTTCCTCTTGCTCCTCCCATACCTTTTGTTTTGGTCAGCCTGCACCTT  
SRR516983.2660585.2+ TCAAGGGTATGCTCTTCCTCTTGCTCCTCCCATACCTTTTGTTTTGGTCAGCCTGCACCTT  
SRR516983.34256945.1+ TCAAGGGTATGCTCTTCCTCTTGCTCCTCCCATACCTTTTGTTTTGGTCAGCCTGCACCTT  
SRR516983.35103124.2+ TCAAGGGTATGCTCTTCCTCTTGCTCCTCCCATACCTTTTGTTTTGGTCAGCCTGCACCTT  
SRR516984.11603344.2+ TCAAGGGTATGCTCTTCCTCTTGCTCCTCCCATACCTTTTGTTTTGGTCAGCCTGCACCTT  
SRR516984.13867668.1- TCAAGGGTATGCTCTTCCTCTTGCTCCTCCCATACCTTTTGTTTTGGTCAGCCTGCACCTT  
SRR516984.26297997.1+ TCAAGGGTATGCTCTTCCTCTTGCTCCTCCCATACCTTTTGTTTTGGTCAGCCTGCACCTT  
SRR516984.51860923.2+ TCAAGGGTATGCTCTTCCTCTTGCTCCTCCCATACCTTTTGTTTTGGTCAGCCTGCACCTT  
SRR516984.67024304.1- TCAAGGGTATGCTCTTCCTCTTGCTCCTCCCATACCTTTTGTTTTGGTCAGCCTGCACCTT  
SRR516984.6951606.2+ TCAAGGGTATGCTCTTCCTCTTGCTCCTCCCATACCTTTTGTTTTGGTCAGCCTGCACCTT  
SRR516984.7183570.1+ TCAAGGGTATGCTCTTCCTCTTGCTCCTCCCATACCTTTTGTTTTGGTCAGCCTGCACCTT  
SRR516985.38800584.1+ TCAAGGGTATGCTCTTCCTCTTGCTCCTCCCATACCTTTTGTTTTGGTCAGCCTGCACCTT  
SRR516985.6369730.2- TCAAGGGTATGCTCTTCCTCTTGCTCCTCCCATACCTTTTGTTTTGGTCAGCCTGCACCTT  
SRR516985.70870904.1- TCAAGGGTATGCTCTTCCTCTTGCTCCTCCCATACCTTTTGTTTTGGTCAGCCTGCACCTT  
SRR516985.71587022.2- TCAAGGGTATGCTCTTCCTCTTGCTCCTCCCATACCTTTTGTTTTGGTCAGCCTGCACCTT  
SRR516985.794078.1+ TCAAGGGTATGCTCTTCCTCTTGCTCCTCCCATACCTTTTGTTTTGGTCAGCCTGCACCTT  
SRR516985.84026477.1+ TCAAGGGTATGCTCTTCCTCTTGCTCCTCCCATACCTTTTGTTTTGGTCAGCCTGCACCTT  
SRR516985.90328884.2+ TCAAGGGTATGCTCTTCCTCTTGCTCCTCCCATACCTTTTGTTTTGGTCAGCCTGCACCTT  
SRR516985.95011897.2+ TCAAGGGTATGCTCTTCCTCTTGCTCCTCCCATACCTTTTGTTTTGGTCAGCCTGCACCTT  
SRR516986.10651932.2+ TCAAGGGTATGCTCTTCCTCTTGCTCCTCCCATACCTTTTGTTTTGGTCAGCCTGCACCTT  
SRR516986.17707572.1- TCAAGGGTATGCTCTTCCTCTTGCTCCTCCCATACCTTTTGTTTTGGTCAGCCTGCACCTT  
SRR516986.22724390.1- TCAAGGGTATGCTCTTCCTCTTGCTCCTCCCATACCTTTTGTTTTGGTCAGCCTGCACCTT  
SRR516987.86762093.1- TCAAGGGTATGCTCTTCCTCTTGCTCCTCCCATACCTTTTGTTTTGGTCAGCCTGCACCTT  
SRR516988.4949152.1- TCAAGGGTATGCTCTTCCTCTTGCTCCTCCCATACCTTTTGTTTTGGTCAGCCTGCACCTT  
SRR516988.60003491.2- TCAAGGGTATGCTCTTCCTCTTGCTCCTCCCATACCTTTTGTTTTGGTCAGCCTGCACCTT  
SRR516989.56916901.2+ TCAAGGGTATGCTCTTCCTCTTGCTCCTCCCATACCTTTTGTTTTGGTCAGCCTGCACCTT  
SRR516989.80624643.2+ TCAAGGGTATGCTCTTCCTCTTGCTCCTCCCATACCTTTTGTTTTGGTCAGCCTGCACCTT  
SRR516990.23106415.2+ TCAAGGGTATGCTCTTCCTCTTGCTCCTCCCATACCTTTTGTTTTGGTCAGCCTGCACCTT  
SRR516990.30495340.2+ TCAAGGGTATGCTCTTCCTCTTGCTCCTCCCATACCTTTTGTTTTGGTCAGCCTGCACCTT  
SRR516990.36711687.2- TCAAGGGTATGCTCTTCCTCTTGCTCCTCCCATACCTTTTGTTTTGGTCAGCCTGCACCTT  
SRR516990.46955085.1+ TCAAGGGTATGCTCTTCCTCTTGCTCCTCCCATACCTTTTGTTTTGGTCAGCCTGCACCTT  
SRR516991.40998329.1- TCAAGGGTATGCTCTTCCTCTTGCTCCTCCCATACCTTTTGTTTTGGTCAGCCTGCACCTT  
SRR516991.52505003.2- TCAAGGGTATGCTCTTCCTCTTGCTCCTCCCATACCTTTTGTTTTGGTCAGCCTGCACCTT  
SRR516991.54630322.1- TCAAGGGTATGCTCTTCCTCTTGCTCCTCCCATACCTTTTGTTTTGGTCAGCCTGCACCTT  
SRR516991.63425507.1+ TCAAGGGTATGCTCTTCCTCTTGCTCCTCCCATACCTTTTGTTTTGGTCAGCCTGCACCTT  
SRR516991.64722198.2- TCAAGGGTATGCTCTTCCTCTTGCTCCTCCCATACCTTTTGTTTTGGTCAGCCTGCACCTT  
SRR516992.42779638.1- TCAAGGGTATGCTCTTCCTCTTGCTCCTCCCATACCTTTTGTTTTGGTCAGCCTGCACCTT  
SRR516992.59812008.2- TCAAGGGTATGCTCTTCCTCTTGCTCCTCCCATACCTTTTGTTTTGGTCAGCCTGCACCTT  
SRR516992.60599956.2- TCAAGGGTATGCTCTTCCTCTTGCTCCTCCCATACCTTTTGTTTTGGTCAGCCTGCACCTT  
SRR516992.65303336.1+ TCAAGGGTATGCTCTTCCTCTTGCTCCTCCCATACCTTTTGTTTTGGTCAGCCTGCACCTT  
SRR516992.78710121.1+ TCAAGGGTATGCTCTTCCTCTTGCTCCTCCCATACCTTTTGTTTTGGTCAGCCTGCACCTT  
SRR516993.14043843.2- TCAAGGGTATGCTCTTCCTCTTGCTCCTCCCATACCTTTTGTTTTGGTCAGCCTGCACCTT  
SRR516993.19338558.2+ TCAAGGGTATGCTCTTCCTCTTGCTCCTCCCATACCTTTTGTTTTGGTCAGCCTGCACCTT



SRR516993.35664507.1- TCAAGGGTATGCTCTTCCTCTTGCTCCTCCCATACCTTTGTTTTGGTCAGCCTGCACCTT  
SRR516993.47859690.2- TCAAGGGTATGCTCTTCCTCTTGCTCCTCCCATACCTTTGTTTTGGTCAGCCTGCACCTT  
SRR516993.77981446.2+ TCAAGGGTATGCTCTTCCTCTTGCTCCTCCCATACCTTTGTTTTGGTCAGCCTGCACCTT  
SRR516994.13045831.2+ TCAAGGGTATGCTCTTCCTCTTGCTCCTCCCATACCTTTGTTTTGGTCAGCCTGCACCTT  
SRR516994.13973863.1+ TCAAGGGTATGCTCTTCCTCTTGCTCCTCCCATACCTTTGTTTTGGTCAGCCTGCACCTT  
SRR516994.22273890.1+ TCAAGGGTATGCTCTTCCTCTTGCTCCTCCCATACCTTTGTTTTGGTCAGCCTGCACCTT  
SRR516995.16662105.2- TCAAGGGTATGCTCTTCCTCTTGCTCCTCCCATACCTTTGTTTTGGTCAGCCTGCACCTT  
SRR516995.20779522.2- TCAAGGGTATGCTCTTCCTCTTGCTCCTCCCATGCTTTTGTGTTTTGGTCAGCCTGCACCTT  
SRR516995.27817063.1+ TCAAGGGTATGCTCTTCCTCTTGCTCCTCCCATACCTTTGTTTTGGTCAGCCTGCACCTT  
SRR516995.4091683.2+ TCAAGGGTATGCTCTTCCTCTTGCTCCTCCCATACCTTTGTTTTGGTCAGCCTGCACCTT  
SRR516996.25148019.2+ TCAAGGGTATGCTCTTCCTCTTGCTCCTCCCATACCTTTGTTTTGGTCAGCCTGCACCTT  
SRR516996.345191.1+ TCAAGGGTATGCTCTTCCTCTTGCTCCTCCCATACCTTTGTTTTGGTCAGCCTGCACCTT  
SRR516996.40869314.1+ TCAAGGGTATGCTCTTCCTCTTGCTCCTCCCATACCTTTGTTTTGGTCAGCCTGCACCTT  
SRR516996.41067957.1- TCAAGGGTATGCTCTTCCTCTTGCTCCTCCCATACCTTTGTTTTGGTCAGCCTGCACCTT  
SRR516996.47443095.1+ TCAAGGGTATGCTCTTCCTCTTGCTCCTCCCATACCTTTGTTTTGGTCAGCCTGCACCTT  
SRR516996.4820423.1- TCAAGGGTATGCTCTTCCTCTTGCTCCTCCCATACCTTTGTTTTGGTCAGCCTGCACCTT  
SRR516996.64162159.1- TCAAGGGTATGCTCTTCCTCTTGCTCCTCCCATACCTTTGTTTTGGTCAGCCTGCACCTT  
SRR516996.84831988.2+ TCAAGGGTATGCTCTTCCTCTTGCTCCTCCCATACCTTTGTTTTGGTCAGCCTGCACCTT  
SRR516996.96865981.1- TCAAGGGTATGCTCTTCCTCTTGCTCCTCCCATACCTTTGTTTTGGTCAGCCTGCACCTT  
SRR516997.12935966.2- TCAAGGGTATGCTCTTCCTCTTGCTCCTCCCATACCTTTGTTTTGGTCAGCCTGCACCTT  
SRR516997.32779052.2+ TCAAGGGTATGCTCTTCCTCTTGCTCCTCCCATACCTTTGTTTTGGTCAGCCTGCACCTT  
SRR516997.49184054.2+ TCAAGGGTATGCTCTTCCTCTTGCTCCTCCCATACCTTTGTTTTGGTCAGCCTGCACCTT  
SRR516997.72118786.2+ TCAAGGGTATGCTCTTCCTCTTGCTCCTCCCATACCTTTGTTTTGGTCAGCCTGCACCTT  
SRR516997.73355617.2+ TCAAGGGTATGCTCTTCCTCTTGCTCCTCCCATACCTTTGTTTTGGTCAGCCTGCACCTT  
SRR516998.27579449.2+ TCAAGGGTATGCTCTTCCTCTTGCTCCTCCCATACCTTTGTTTTGGTCAGCCTGCACCTT  
SRR516998.40607410.2- TCAAGGGTATGCTCTTCCTCTTGCTCCTCCCATACCTTTGTTTTGGTCAGCCTGCACCTT  
SRR516998.87531343.2- TCAAGGGTATGCTCTTCCTCTTGCTCCTCCCATACCTTTGTTTTGGTCAGCCTGCACCTT  
SRR516998.89996681.2+ TCAAGGGTATGCTCTTCCTCTTGCTCCTCCCATACCTTTGTTTTGGTCAGCCTGCACCTT  
SRR516998.95088687.1- TCAAGGGTATGCTCTTCCTCTTGCTCCTCCCATACCTTTGTTTTGGTCAGCCTGCACCTT  
SRR516999.32513950.1- TCAAGGGTATGCTCTTCCTCTTGCTCCTCCCATACCTTTGTTTTGGTCAGCCTGCACCTT  
SRR516999.38940100.1+ TCAAGGGTATGCTCTTCCTCTTGCTCCTCCCATACCTTTGTTTTGGTCAGCCTGCACCTT  
SRR516999.40240407.2+ TCAAGGGTATGCTCTTCCTCTTGCTCCTCCCATACCTTTGTTTTGGTCAGCCTGCACCTT  
SRR516999.41559143.1- TCAAGGGTATGCTCTTCCTCTTGCTCCTCCCATACCTTTGTTTTGGTCAGCCTGCACCTT  
SRR516999.42713432.1+ TCAAGGGTATGCTCTTCCTCTTGCTCCTCCCATACCTTTGTTTTGGTCAGCCTGCACCTT  
SRR516999.45267731.1+ TCAAGGGTATGCTCTTCCTCTTGCTCCTCCCATACCTTTGTTTTGGTCAGCCTGCACCTT  
SRR516999.47140010.1+ TCAAGGGTATGCTCTTCCTCTTGCTCCTCCCATACCTTTGTTTTGGTCAGCCTGCACCTT  
SRR516999.51381955.2- TCAAGGGTATGCTCTTCCTCTTGCTCCTCCCATACCTTTGTTTTGGTCAGCCTGCACCTT  
SRR516999.58849034.2- TCAAGGGTATGCTCTTCCTCTTGCTCCTCCCATACCTTTGTTTTGGTCAGCCTGCACCTT  
SRR516999.68726039.1- TCAAGGGTATGCTCTTCCTCTTGCTCCTCCCATACCTTTGTTTTGGTCAGCCTGCACCTT  
SRR516999.6894145.1- TCAAGGGTATGCTCTTCCTCTTGCTCCTCCCATACCTTTGTTTTGGTCAGCCTGCACCTT  
SRR516999.76775311.2+ TCAAGGGTATGCTCTTCCTCTTGCTCCTCCCATACCTTTGTTTTGGTCAGCCTGCACCTT  
SRR517000.44752129.1- TCAAGGGTATGCTCTTCCTCTTGCTCCTCCCATACCTTTGTTTTGGTCAGCCTGCACCTT  
SRR517000.59906460.1+ TCAAGGGTATGCTCTTCCTCTTGCTCCTCCCATACCTTTGTTTTGGTCAGCCTGCACCTT  
SRR517000.67695666.1- TCAAGGGTATGCTCTTCCTCTTGCTCCTCCCATACCTTTGTTTTGGTCAGCCTGCACCTT  
SRR517000.83969593.2- TCAAGGGTATGCTCTTCCTCTTGCTCCTCCCATACCTTTGTTTTGGTCAGCCTGCACCTT  
SRR517000.95262135.1- TCAAGGGTATGCTCTTCCTCTTGCTCCTCCCATACCTTTGTTTTGGTCAGCCTGCACCTT  
SRR517001.13478608.1+ TCAAGGGTATGCTCTTCCTCTTGCTCCTCCCATACCTTTGTTTTGGTCAGCCTGCACCTT  
SRR517001.43143516.2+ TCAAGGGTATGCTCTTCCTCTTGCTCCTCCCATACCTTTGTTTTGGTCAGCCTGCACCTT  
SRR517001.50757283.1- TCAAGGGTATGCTCTTCCTCTTGCTCCTCCCATACCTTTGTTTTGGTCAGCCTGCACCTT  
SRR517002.25042325.1+ TCAAGGGTATGCTCTTCCTCTTGCTCCTCCCATACCTTTGTTTTGGTCAGCCTGCACCTT  
SRR517002.26060078.2- TCAAGGGTATGCTCTTCCTCTTGCTCCTCCCATACCTTTGTTTTGGTCAGCCTGCACCTT  
SRR517002.67211818.1- TCAAGGGTATGCTCTTCCTCTTGCTCCTCCCATACCTTTGTTTTGGTCAGCCTGCACCTT  
SRR517002.81950718.1+ TCAAGGGTATGCTCTTCCTCTTGCTCCTCCCATACCTTTGTTTTGGTCAGCCTGCACCTT  
SRR517002.82258575.2- TCAAGGGTATGCTCTTCCTCTTGCTCCTCCCATACCTTTGTTTTGGTCAGCCTGCACCTT  
SRR517002.91703218.2+ TCAAGGGTATGCTCTTCCTCTTGCTCCTCCCATACCTTTGTTTTGGTCAGCCTGCACCTT  
SRR517003.19342168.1+ TCAAGGGTATGCTCTTCCTCTTGCTCCTCCCATACCTTTGTTTTGGTCAGCCTGCACCTT  
SRR517003.20939478.2- TCAAGGGTATGCTCTTCCTCTTGCTCCTCCCATACCTTTGTTTTGGTCAGCCTGCACCTT  
SRR517003.5667689.1- TCAAGGGTATGCTCTTCCTCTTGCTCCTCCCATACCTTTGTTTTGGTCAGCCTGCACCTT  
SRR517004.28032599.1- TCAAGGGTATGCTCTTCCTCTTGCTCCTCCCATACCTTTGTTTTGGTCAGCCTGCACCTT  
SRR517005.42320821.2- TCAAGGGTATGCTCTTCCTCTTGCTCCTCCCATACCTTTGTTTTGGTCAGCCTGCACCTT  
SRR517006.4335776.2- TCAAGGGTATGCTCTTCCTCTTGCTCCTCCCATACCTTTGTTTTGGTCAGCCTGCACCTT  
SRR517006.52685296.2- TCAAGGGTATGCTCTTCCTCTTGCTCCTCCCATACCTTTGTTTTGGTCAGCCTGCACCTT  
SRR517006.64062576.1- TCAAGGGTATGCTCTTCCTCTTGCTCCTCCCATACCTTTGTTTTGGTCAGCCTGCACCTT  
SRR517006.75846793.2+ TCAAGGGTATGCTCTTCCTCTTGCTCCTCCCATACCTTTGTTTTGGTCAGCCTGCACCTT  
SRR517006.82333459.1- TCAAGGGTATGCTCTTCCTCTTGCTCCTCCCATACCTTTGTTTTGGTCAGCCTGCACCTT  
SRR517006.8320014.2+ TCAAGGGTATGCTCTTCCTCTTGCTCCTCCCATACCTTTGTTTTGGTCAGCCTGCACCTT  
SRR517007.25883181.1+ TCAAGGGTATGCTCTTCCTCTTGCTCCTCCCATACCTTTGTTTTGGTCAGCCTGCACCTT  
SRR517007.47743023.1- TCAAGGGTATGCTCTTCCTCTTGCTCCTCCCATACCTTTGTTTTGGTCAGCCTGCACCTT  
SRR517007.50962620.2+ TCAAGGGTATGCTCTTCCTCTTGCTCCTCCCATACCTTTGTTTTGGTCAGCCTGCACCTT  
SRR517007.51506783.2+ TCAAGGGTATGCTCTTCCTCTTGCTCCTCCCATACCTTTGTTTTGGTCAGCCTGCACCTT  
SRR517007.60890697.2+ TCAAGGGTATGCTCTTCCTCTTGCTCCTCCCATACCTTTGTTTTGGTCAGCCTGCACCTT  
SRR517008.31099343.2- TCAAGGGTATGCTCTTCCTCTTGCTCCTCCCATACCTTTGTTTTGGTCAGCCTGCACCTT  
SRR517008.35456369.2+ TCAAGGGTATGCTCTTCCTCTTGCTCCTCCCATACCTTTGTTTTGGTCAGCCTGCACCTT  
SRR517008.67351581.2+ TCAAGGGTATGCTCTTCCTCTTGCTCCTCCCATACCTTTGTTTTGGTCAGCCTGCACCTT  
SRR517008.8977763.1- TCAAGGGTATGCTCTTCCTCTTGCTCCTCCCATACCTTTGTTTTGGTCAGCCTGCACCTT  
SRR517009.19164909.2- TCAAGGGTATGCTCTTCCTCTTGCTCCTCCCATACCTTTGTTTTGGTCAGCCTGCACCTT  
SRR517009.40247008.2+ TCAAGGGTATGCTCTTCCTCTTGCTCCTCCCATACCTTTGTTTTGGTCAGCCTGCACCTT  
SRR517009.45770063.2+ TCAAGGGTATGCTCTTCCTCTTGCTCCTCCCATACCTTTGTTTTGGTCAGCCTGCACCTT  
SRR517009.5972409.1- TCAAGGGTATGCTCTTCCTCTTGCTCCTCCCATACCTTTGTTTTGGTCAGCCTGCACCTT  
SRR517009.70549529.2+ TCAAGGGTATGCTCTTCCTCTTGCTCCTCCCATACCTTTGTTTTGGTCAGCCTGCACCTT  
SRR51892.28064592.1+ CAAGGGTATGCTCTTCCTCTTGCTCCTCCCATACCTTTGTTTTGGTCAGCCTGCACCTT  
SRR51892.41096124.1+ CAAGGGTATGCTCTTCCTCTTGCTCCTCCCATACCTTTGTTTTGGTCAGCCTGCACCTT  
SRR516973.1417145.2- CAAGGGTATGCTCTTCCTCTTGCTCCTCCCATACCTTTGTTTTGGTCAGCCTGCACCTT  
SRR516973.1417146.2- CAAGGGTATGCTCTTCCTCTTGCTCCTCCCATACCTTTGTTTTGGTCAGCCTGCACCTT

SRR516991.89756659.2- CAAGGGTATGCTCTTCCTCTTGCTCCTCCCATACCTTTTGTTTTGGTCAGCCTGCACCTT  
SRR516992.7333033.1+ CAAGGGTATGCTCTTCCTCTTGCTCCTCCCATACCTTTTGTTTTGGTCAGCCTGCACCTT  
SRR516998.65411337.1+ CAAGGGTATGCTCTTCCTCTTGCTCCTCCCATACCTTTTGTTTTGGTCAGCCTGCACCTT  
SRR517006.59401473.1- CAAGGGTATGCTCTTCCTCTTGCTCCTCCCATACCTTTTGTTTTGGTCAGCCTGCACCTT  
SRR516968.109900230.1+ AAGGGTATGCTCTTCCTCTTGCTCCTCCCATACCTTTTGTTTTGGTCAGCCTGCACCTT  
SRR516972.63489975.1+ AAGGGTATGCTCTTCCTCTTGCTCCTCCCATACCTTTTGTTTTGGTCAGCCTGCACCTT  
SRR516974.43659576.1+ AAGGGTATGCTCTTCCTCTTGCTCCTCCCATACCTTTTGTTTTGGTCAGCCTGCACCTT  
SRR516986.47033107.2+ AAGGGTATGCTCTTCCTCTTGCTCCTCCCATACCTTTTGTTTTGGTCAGCCTGCACCTT  
SRR516988.14405849.2+ AAGGGTATGCTCTTCCTCTTGCTCCTCCCATACCTTTTGTTTTGGTCAGCCTGCACCTT  
SRR516991.84387060.1+ AAGGGTATGCTCTTCCTCTTGCTCCTCCCATACCTTTTGTTTTGGTCAGCCTGCACCTT  
SRR516993.73666384.1+ AAGGGTATGCTCTTCCTCTTGCTCCTCCCATACCTTTTGTTTTGGTCAGCCTGCACCTT  
SRR516995.73341151.2+ AAGGGAATGCTCTTCCTCTTGCTCCTCCCATAGTTTGGTTTGGACAGCCTGCAGCTT  
SRR516996.17100141.2- AAGGGTATGCTCTTCCTCTTGCTCCTCCCATACCTTTTGTTTTGGTCAGCCTGCACCTT  
SRR516998.784538.1+ AAGGGTATGCTCTTCCTCTTGCTCCTCCCATACCTTTTGTTTTGGTCAGCCTGCACCTT  
SRR517001.57642820.1+ AAGGGTATGCTCTTCCTCTTGCTCCTCCCATACCTTTTGTTTTGGTCAGCCTGCACCTT  
SRR517008.22652667.1+ AAGGGTATGCTCTTCCTCTTGCTCCTCCCATACCTTTTGTTTTGGTCAGCCTGCACCTT  
SRR511913.5587657.2+ AGGGTATGCTCTTCCTCTTGCTCCTCCCATACCTTTTGTTTTGGTCAGCCTGCACCTT  
SRR516967.113781662.1+ AGGGTATGCTCTTCCTCTTGCTCCTCCCATACCTTTTGTTTTGGTCAGCCTGCACCTT  
SRR516967.75977499.2- AGGGTATGCTCTTCCTCTTGCTCCTCCCATACCTTTTGTTTTGGTCAGCCTGCACCTT  
SRR516968.13503998.1- AGGGTATGCTCTTCCTCTTGCTCCTCCCATACCTTTTGTTTTGGTCAGCCTGCACCTT  
SRR516974.46129857.2- AGGGTATGCTCTTCCTCTTGCTCCTCCCATACCTTTTGTTTTGGTCAGCCTGCACCTT  
SRR516992.26195657.2- AGGGTATGCTCTTCCTCTTGCTCCTCCCATACCTTTTGTTTTGGTCAGCCTGCACCTT  
SRR516994.51970256.2- AGGGTATGCTCTTCCTCTTGCTCCTCCCATACCTTTTGTTTTGGTCAGCCTGCACCTT  
SRR517002.87764725.1+ AGGGTATGCTCTTCCTCTTGCTCCTCCCATACCTTTTGTTTTGGTCAGCCTGCACCTT  
SRR517009.33285239.1+ AGGGTATGCTCTTCCTCTTGCTCCTCCCATACCTTTTGTTTTGGTCAGCCTGCACCTT  
SRR516979.72185467.1- GGGTATGCTCTTCCTCTTGCTCCTCCCATACCTTTTGTTTTGGTCAGCCTGCACCTT  
SRR516995.50080094.1+ GGGTATGCTCTTCCTCTTGCTCCTCCCATACCTTTTGTTTTGGTCAGCCTGCACCTT  
SRR517006.37525580.1+ GGGTATGCTCTTCCTCTTGCTCCTCCCATACCTTTTGTTTTGGTCAGCCTGCACCTT  
SRR517009.46221980.2+ GGGTATGCTCTTCCTCTTGCTCCTCCCATACCTTTTGTTTTGGTCAGCCTGCACCTT  
SRR516967.692820.1+ GGTATGCTCTTCCTCTTGCTCCTCCCATACCTTTTGTTTTGGTCAGCCTGCACCTT  
SRR516970.33702206.1- GGTATGCTCTTCCTCTTGCTCCTCCCATACCTTTTGTTTTGGTCAGCCTGCACCTT  
SRR516972.26613549.2+ GGTATGCTCTTCCTCTTGCTCCTCCCATACCTTTTGTTTTGGTCAGCCTGCACCTT  
SRR516973.19319985.2+ GGTATGCTCTTCCTCTTGCTCCTCCCATACCTTTTGTTTTGGTCAGCCTGCACCTT  
SRR516983.80722236.2+ GGTATGCTCTTCCTCTTGCTCCTCCCATACCTTTTGTTTTGGTCAGCCTGCACCTT  
SRR511892.39300111.2+ GTATGCTCTTCCTCTTGCTCCTCCCATACCTTTTGTTTTGGTCAGCCTGCACCTT  
SRR516967.143302175.2- GTATGCTCTTCCTCTTGCTCCTCCCATACCTTTTGTTTTGGTCAGCCTGCACCTT  
SRR516967.40446194.1+ GTATGCTCTTCCTCTTGCTCCTCCCATACCTTTTGTTTTGGTCAGCCTGCACCTT  
SRR516975.16339360.1+ GTATGCTCTTCCTCTTGCTCCTCCCATACCTTTTGTTTTGGTCAGCCTGCACCTT  
SRR516993.45140548.2- GTATGCTCTTCCTCTTGCTCCTCCCATACCTTTTGTTTTGGTCAGCCTGCACCTT  
SRR516996.39193734.1- GTATGCTCTTCCTCTTGCTCCTCCCATACCTTTTGTTTTGGTCAGCCTGCACCTT  
SRR517008.15407290.1+ GTATGCTCTTCCTCTTGCTCCTCCCATACCTTTTGTTTTGGTCAGCCTGCACCTT  
SRR511914.74202240.2+ TATGCTCTTCCTCTTGCTCCTCCCATACCTTTTGTTTTGGTCAGCCTGCACCTT  
SRR511914.74202383.2+ TATGCTCTTCCTCTTGCTCCTCCCATACCTTTTGTTTTGGTCAGCCTGCACCTT  
SRR511915.77154079.1+ TATGCTCTTCCTCTTGCTCCTCCCATACCTTTTGTTTTGGTCAGCCTGCACCTT  
SRR516967.3323960.1+ TATGCTCTTCCTCTTGCTCCTCCCATACCTTTTGTTTTGGTCAGCCTGCACCTT  
SRR516973.17670450.1+ TATGCTCTTCCTCTTGCTCCTCCCATACCTTTTGTTTTGGTCAGCCTGCACCTT  
SRR516973.41289849.2+ TATGCTCTTCCTCTTGCTCCTCCCATACCTTTTGTTTTGGTCAGCCTGCACCTT  
SRR516981.50701184.1+ TATGCTCTTCCTCTTGCTCCTCCCATACCTTTTGTTTTGGTCAGCCTGCACCTT  
SRR516990.1457908.1- TATGCTCTTCCTCTTGCTCCTCCCATACCTTTTGTTTTGGTCAGCCTGCACCTT  
SRR516995.57519330.1- TATGCTCTTCCTCTTGCTCCTCCCATACCTTTTGTTTTGGTCAGCCTGCACCTT  
SRR516998.95947533.1+ TATGCTCTTCCTCTTGCTCCTCCCATACCTTTTGTTTTGGTCAGCCTGCACCTT  
SRR517001.86378213.2- TATGCTCTTCCTCTTGCTCCTCCCATACCTTTTGTTTTGGTCAGCCTGCACCTT  
SRR516967.51922488.1+ ATGCTCTTCCTCTTGCTCCTCCCATACCTTTTGTTTTGGTCAGCCTGCACCTT  
SRR516967.66315071.1+ ATGCTCTTCCTCTTGCTCCTCCCATACCTTTTGTTTTGGTCAGCCTGCANCTT  
SRR516982.12131511.1+ ATGCTCTTCCTCTTGCTCCTCCCATACCTTTTGTTTTGGTCAGCCTGCACCTT  
SRR516992.74240970.2+ ATGCTCTTCCTCTTGCTCCTCCCATACCTTTTGTTTTGGTCAGCCTGCACCTT  
SRR511916.38138441.2+ TGCTCTTCCTCTTGCTCCTCCCATACCTTTTGTTTTGGTCAGCCTGCACC  
SRR511917.60034213.2+ TGCTCTTCCTCTTGCTCCTCCCATACCTTTTGTTTTGGTCAGCCTGCACC  
SRR516971.33071473.1+ TGCTCTTCCTCTTGCTCCTCCCATACCTTTTGTTTTGGTCAGCCTGCACCTT  
SRR516978.27059321.2+ TGCTCTTCCTCTTGCTCCTCCCATACCTTTTGTTTTGGTCAGCCTGCACCTT  
SRR516983.33407963.2+ TGCTCTTCCTCTTGCTCCTCCCATACCTTTTGTTTTGGTCAGCCTGCACCTT  
SRR516984.90374479.1- TGCTCTTCCTCTTGCTCCTCCCATACCTTTTGTTTTGGTCAGCCTGCACCTT  
SRR516991.17053852.2+ TGCTCTTCCTCTTGCTCCTCCCATACCTTTTGTTTTGGTCAGCCTGCACCTT  
SRR516997.61814545.2+ TGCTCTTCCTCTTGCTCCTCCCATACCTTTTGTTTTGGTCAGCCTGCACCTT  
SRR516998.100162957.2- TGCTCTTCCTCTTGCTCCTCCCATACCTTTTGTTTTGGTCAGCCTGCACCTT  
SRR511912.43117119.2+ GCTCTTCCTCTTGCTCCTCCCATACCTTTTGTTTTGGTCAGCCTGCACCTT  
SRR511915.70587641.1- GCTCTTCCTCTTGCTCCTCCCATACCTTTTGTTTTGGTCAGCCTGCACCTT  
SRR511915.70587944.1- GCTCTTCCTCTTGCTCCTCCCATACCTTTTGTTTTGGTCAGCCTGCACCTT  
SRR516973.53561779.1- GCTCTTCCTCTTGCTCCTCCCATACCTTTTGTTTTGGTCAGCCTGCACCTT  
SRR516978.47021888.1+ GCTCTTCCTCTTGCTCCTCCCATACCTTTTGTTTTGGTCAGCCTGCACCTT  
SRR516985.87014315.2- GCTCTTCCTCTTGCTCCTCCCATACCTTTTGTTTTGGTCAGCCTGCACCTT  
SRR516986.24845211.1- GCTCTTCCTCTTGCTCCTCCCATACCTTTTGTTTTGGTCAGCCTGCACCTT  
SRR516988.60315129.1- GCTCTTCCTCTTGCTCCTCCCATACCTTTTGTTTTGGTCAGCCTGCACCTT  
SRR516999.52172306.2+ GCTCTTCCTCTTGCTCCTCCCATACCTTTTGTTTTGGTCAGCCTGCACCTT  
SRR517000.8953178.1+ CTCTTCCTCTTGCTCCTCCCATACCTTTTGTTTTGGTCAGCCTGCACCTT  
SRR511892.65397717.2+ CTCTTCCTCTTGCTCCTCCCATACCTTTTGTTTTGGTCAGCCTGCACCTT  
SRR516989.72004672.2+ CTCTTCCTCTTGCTCCTCCCATACCTTTTGTTTTGGTCAGCCTGCACCTT  
SRR516998.14101174.1- CTCTTCCTCTTGCTCCTCCCATACCTTTTGTTTTGGTCAGCCTGCACCTT  
SRR517000.44421459.2- CTCTTCCTCTTGCTCCTCCCATACCTTTTGTTTTGGTCAGCCTGCACCTT  
SRR517009.47221478.1+ CTCTTCCTCTTGCTCCTCCCATACCTTTTGTTTTGGTCAGCCTGCACCTT  
SRR511892.37274156.1+ TCTTCCTCTTGCTCCTCCCATACCTTTTGTTTTGGTCAGCCTGCACCTT  
SRR511911.71659560.1- TCTTCCTCTTGCTCCTCCCATACCTTTTGTTTTGGTCAGCCTGCACCTT  
SRR516971.18124229.1- TCTTCCTCTTGCTCCTCCCATACCTTTTGTTTTGGTCAGCCTGCACCTT  
SRR516972.23056341.2+ TCTTCCTCTTGCTCCTCCCATACCTTTTGTTTTGGTCAGCCTGCACCTT











|                        |                  |
|------------------------|------------------|
| SRR516996.4820423.1-   | CACT             |
| SRR517005.42320821.2-  | CACT             |
| SRR516977.71210552.2-  | CACTG            |
| SRR516981.16534572.1+  | CACTG            |
| SRR516985.84026477.1+  | CACTG            |
| SRR517008.8977763.1-   | CACTG            |
| SRR516986.10651932.2+  | CACTGC           |
| SRR516995.20779522.2-  | CACTGC           |
| SRR516997.49184054.2+  | CACTGC           |
| SRR517000.95262135.1-  | CACTGC           |
| SRR516975.51826312.2-  | CACTGCT          |
| SRR516989.80624643.2+  | CACTGCT          |
| SRR516992.65303336.1+  | CACTGCT          |
| SRR516993.19338558.2+  | CACTGCT          |
| SRR516993.35664507.1-  | CACTGCT          |
| SRR516997.32779052.2+  | CACTGCT          |
| SRR517001.50757283.1-  | CACTGCT          |
| SRR517002.67211818.1-  | CACTGCT          |
| SRR517009.70549529.2+  | CACTGCT          |
| SRR516978.60261999.1-  | CACTGCTG         |
| SRR516985.6369730.2-   | CACTGCTG         |
| SRR516994.13045831.2+  | CACTGCTG         |
| SRR516997.72118786.2+  | CACTGCTG         |
| SRR516998.27579449.2+  | CACTGCTG         |
| SRR516999.40240407.2+  | CACTGCTG         |
| SRR517002.25042325.1+  | CACTGCTG         |
| SRR517003.19342168.1+  | CACTGCTG         |
| SRR511917.9086576.1+   | CACTGCTGC        |
| SRR516981.26581776.2+  | CACTGCTGC        |
| SRR516984.13867668.1-  | CACTGCTGC        |
| SRR516985.794078.1+    | CACTGCTGC        |
| SRR516991.64722198.2-  | CACTGCTGC        |
| SRR517001.13478608.1+  | CACTGCTGC        |
| SRR511892.28500594.1+  | CACTGCTGCA       |
| SRR511911.53964321.2+  | CACTGCTGCA       |
| SRR511914.39483852.2+  | CACTGCTGCA       |
| SRR516973.25479726.2+  | CACTGCTGCA       |
| SRR511914.44813836.2+  | TACTGCTGCAT      |
| SRR516985.90328884.2+  | CACTGCTGCGT      |
| SRR516990.36711687.2-  | CACTGCTGCAT      |
| SRR516991.52505003.2-  | CACTGCTGCGT      |
| SRR516998.95088687.1-  | CACTGCTGCGT      |
| SRR517002.26060078.2-  | CACTGCTGCAT      |
| SRR511892.35285726.2+  | CACTGCTGCATT     |
| SRR511913.5222172.1-   | CACTGCTGCATT     |
| SRR516971.4236129.1-   | CACTGCTGCGTT     |
| SRR516984.51860923.2+  | CACTGCTGCGTT     |
| SRR516985.38800584.1+  | CACTGCTGCGTT     |
| SRR517006.82333459.1-  | CACTGCTGCATT     |
| SRR516970.37367691.1+  | CACTGCTGCGTTT    |
| SRR516971.34030929.1-  | CACTGCTGCGTTT    |
| SRR516972.48121654.2-  | CACTGCTGCATTT    |
| SRR516978.69371288.1-  | CACTGCTGCGTTT    |
| SRR516980.49332165.2+  | CACTGCTGCGTTT    |
| SRR516986.22724390.1-  | CACTGCTGCATTT    |
| SRR516990.46955085.1+  | CACTGCTGCATTT    |
| SRR516993.77981446.2+  | CACTGCTGCGTTT    |
| SRR516998.40607410.2-  | CACTGCTGCGTTT    |
| SRR517009.19164909.2-  | CACTGCTGCGTTT    |
| SRR517009.5972409.1-   | CACTGCTGCGTTT    |
| SRR516970.17885639.1-  | CACTGCTGCGTTTC   |
| SRR516974.48843984.2-  | CACTGCTGCATTTTC  |
| SRR516978.14547831.1+  | CACTGCTGCGTTTC   |
| SRR516985.70870904.1-  | CACTGCTGCGTTTC   |
| SRR516995.16662105.2-  | CACTGCTGCGTTTC   |
| SRR516995.73341151.2+  | CACTGCTGCGTTTC   |
| SRR516968.128087344.1+ | CACTGCTGCATTTCT  |
| SRR516974.24280528.2-  | CACTGCTGCATTTCT  |
| SRR516999.51381955.2-  | CACTGCTGCATTTCT  |
| SRR517004.28032599.1-  | CACTGCTGCGTTTCT  |
| SRR517006.64062576.1-  | CACTGCTGCATTTCT  |
| SRR517007.60890697.2+  | CACTGCTGCATTTCT  |
| SRR517009.45770063.2+  | CACTGCTGCGTTTCT  |
| SRR511911.48293933.1+  | CACTGCTGCATTTTCT |
| SRR511911.61131441.2-  | CACTGCTGCATTTTCT |
| SRR516967.23066803.1+  | CACTGCTGCATTTTCT |
| SRR516968.73747636.2+  | CACTGCTGCATTTTCT |
| SRR516969.33135240.1+  | CACTGCTGCGTTTCT  |
| SRR516969.867824.1+    | CACTGCTGCGTTTCT  |
| SRR516988.4949152.1-   | CACTGCTGCGTTTCT  |
| SRR516997.73355617.2+  | CACTGCTGCATTTTCT |
| SRR516998.87531343.2-  | CACTGCTGCATTTTCT |
| SRR517002.82258575.2-  | CACTGCTGCATTTTCT |
| SRR517006.4335776.2-   | CACTGCTGCATTTTCT |



SRR517006.52685296.2- CACTGCTGCATTTCTC  
SRR516967.41353207.1- CACTGCTGCATTTCTCC  
SRR516968.165290408.2- CACTGCTGCATTTCTCC  
SRR516982.49581501.1- CACTGCTGCGTTTCTCC  
SRR516983.35103124.2+ CACTGCTGCATTTCTCC  
SRR516974.1759552.2+ CACTGCTGCATTTCTCCA  
SRR516979.30065340.2+ CACTGCTGCGTTTCTCCA  
SRR516984.6951606.2+ CACTGCTGCATTTCTCCA  
SRR516986.17707572.1- CACTGCTGCATTTCTCCA  
SRR516999.32513950.1- CACTGCTGCATTTCTCCA  
SRR517000.67695666.1- CACTGCTGCGTTTCTCCA  
SRR517007.47743023.1- CACTGCTGCATTTCTCCA  
SRR516967.72187734.1+ CACTGCTGCATTTCTCCAT  
SRR516971.6695405.1+ CACTGCTGCGTTTCTCCAT  
SRR516974.33187826.2- CACTGCTGCATTTCTCCAT  
SRR516977.65941636.2- CACTGCTGCGTTTCTCCAT  
SRR516979.7087082.1- CACTGCTGCGTTTCTCCAT  
SRR516981.69540153.2- CACTGCTGCATTTCTCCAT  
SRR517000.44752129.1- CACTGCTGCATTTCTCCAT  
SRR511915.2208112.2- CACTGCTGCATTTCTCCATC  
SRR511915.2208399.2- CACTGCTGCATTTCTCCATC  
SRR516981.34446750.1- CACTGCTGCATTTCTCCATC  
SRR516991.54630322.1- CACTGCTGCATTTCTCCATC  
SRR517000.59906460.1+ CACTGCTGCGTTTCTCCATC  
SRR511914.43073009.1+ CACTGCTGCATTTCTCCATCT  
SRR516968.80862039.2- CACTGCTGCGTTTCTCCATCT  
SRR516972.30802147.2- CACTGCTGCATTTCTCCATCT  
SRR517006.75846793.2+ CACTGCTGCATTTCTCCATCT  
SRR511912.16411003.2- CACTGCTGCATTTCTCCATCTT  
SRR511912.9044568.1+ CACTGCTGCATTTCTCCATCTT  
SRR511915.50178675.2- CACTGCTGCATTTCTCCATCTT  
SRR516992.59812008.2- CACTGCTGCATTTCTCCATCTT  
SRR516992.60599956.2- CACTGCTGCATTTCTCCATCTT  
SRR516994.13973863.1+ CACTGCTGCGTTTCTCCATCTT  
SRR516996.47443095.1+ CACTGCTGCATTTCTCCATCTT  
SRR516996.84831988.2+ CACTGCTGCATTTCTCCATCTT  
SRR516999.45267731.1+ CACTGCTGCATTTCTCCATCTT  
SRR517002.81950718.1+ CACTGCTGCATTTCTCCATCTT  
SRR517007.25883181.1+ CACTGCTGCATTTCTCCATCTT  
SRR511911.24447502.2- CACTGCTGCATTTCTCCATCTTC  
SRR511915.12387403.1+ CACTGCTGCATTTCTCCATCTTC  
SRR516967.143090323.1- CACTGCTGCATTTCTCCATCTTC  
SRR516967.99920687.2- CACTGCTGCATTTCTCCATCTTC  
SRR516972.53472127.1- CACTGCTGCATTTCTCCATCTTC  
SRR516972.77543660.1+ CACTGCTGCATTTCTCCATCTTC  
SRR516978.70829906.1+ CACTGCTGCGTTTCTCCATCTTC  
SRR516995.4091683.2+ CACTGCTGCGTTTCTCCATCTTC  
SRR516999.38940100.1+ CACTGCTGCATTTCTCCATCTTC  
SRR516999.42713432.1+ CACTGCTGCATTTCTCCATCTTC  
SRR516968.31712935.1- CACTGCTGCATTTCTCCATCTTCC  
SRR516972.67116381.2- CACTGCTGCATTTCTCCATCTTCC  
SRR516981.56879022.2+ CACTGCTGCATTTCTCCATCTTCC  
SRR516997.12935966.2- CACTGCTGCATTTCTCCATCTTCC  
SRR517002.91703218.2+ CACTGCTGCATTTCTCCATCTTCC  
SRR516985.71587022.2- CACTGCTGCGTTTCTCCATCTTCCCT  
SRR516990.23106415.2+ CACTGCTGCATTTCTCCATCTTCCCT  
SRR516992.42779638.1- CACTGCTGCATTTCTCCATCTTCCCT  
SRR516995.27817063.1+ CACTGCTGCGTTTCTCCATCTTCCCT  
SRR516996.41067957.1- CACTGCTGCATTTCTCCATCTTCCCT  
SRR516996.64162159.1- CACTGCTGCATTTCTCCATCTTCCCT  
SRR517001.43143516.2+ CACTGCTGCGTTTCTCCATCTTCCCT  
SRR511913.41367866.2+ CACTGCTGCATTTCTCCATCTTCCCTG  
SRR516967.114035844.1+ CACTGCTGCATTTCTCCATCTTCCCTG  
SRR516970.33098467.1- CACTGCTGCGTTTCTCCATCTTCCCTG  
SRR516984.11603344.2+ CACTGCTGCGTTTCTCCATCTTCCCTG  
SRR516985.95011897.2+ CACTGCTGCGTTTCTCCATCTTCCCTG  
SRR516990.30495340.2+ CACTGCTGCATTTCTCCATCTTCCCTG  
SRR516996.40869314.1+ CACTGCTGCATTTCTCCATCTTCCCTG  
SRR517007.50962620.2+ CACTGCTGCATTTCTCCATCTTCCCTG  
SRR511916.12623440.2+ CACTGCTGCATTTCTCCATCTTCCCTGG  
SRR511916.12623444.2+ CACTGCTGCATTTCTCCATCTTCCCTGG  
SRR511917.23628752.2+ CACTGCTGCATTTCTCCATCTTCCCTGG  
SRR516974.24221041.1- CACTGCTGCATTTCTCCATCTTCCCTGG  
SRR516977.3418701.1+ CACTGCTGCGTTTCTCCATCTTCCCTGG  
SRR516978.44746730.2+ CACTGCTGCGTTTCTCCATCTTCCCTGG  
SRR516979.27449937.1+ CACTGCTGCGTTTCTCCATCTTCCCTGG  
SRR516983.18957782.2+ CACTGCTGCATTTCTCCCTTTCCCTGG  
SRR516996.25148019.2+ CACTGCTGCATTTCTCCATTTCCCTGG  
SRR516996.96865981.1- CACTGCTGCATTTCTCCATTTCCCTGG  
SRR516998.89996681.2+ CACTGCTGCATTTCTCCATTTCCCTGG  
SRR516968.111104702.2- CACTGCTGCGTTTCTCCATTTCCCTGGA  
SRR516970.33098640.1- CACTGCTGCGTTTCTCCATTTCCCTGGA  
SRR516977.2738721.1- CACTGCTGCGTTTCTCCATTTCCCTGGA  
SRR516981.43172628.1- CACTGCTGCATTTCTCCATTTCCCTGGA

SRR516992.78710121.1+ CACTGCTGCATTTCTCCATCTTCTGGA  
SRR516996.345191.1+ CACTGCTGCATTTCTCCATCTTCTGGA  
SRR516998.18257531.2- CACTGCTGCATTTCTCCATCTTCTGGA  
SRR516999.41559143.1- CACTGCTGCATTTCTCCATCTTCTGGA  
SRR516999.68726039.1- CACTGCTGCATTTCTCCATCTTCTGGA  
SRR517006.8320014.2+ CACTGCTGCATTTCTCCATCTTCTGGA  
SRR517009.40247008.2+ CACTGCTGCATTTCTCCATCTTCTGGA  
SRR511918.23041134.2+ CACTGCTGCATTTCTCCATCTTCTGGA  
SRR511918.23041136.2+ CACTGCTGCATTTCTCCATCTTCTGGA  
SRR511918.36794599.2+ CACTGCTGCATTTCTCCATCTTCTGGA  
SRR511920.10061090.2- CACTGCTGCATTTCTCCATCTTCTGGA  
SRR511920.20487711.2- CACTGCTGCATTTCTCCATCTTCTGGA  
SRR511920.20487970.2- CACTGCTGCATTTCTCCATCTTCTGGA  
SRR511920.23071387.2- CACTGCTGCATTTCTCCATCTTCTGGA  
SRR511920.26852972.2- CACTGCTGCATTTCTCCATCTTCTGGA  
SRR511920.26853216.2- CACTGCTGCATTTCTCCATCTTCTGGA  
SRR511920.30130909.2- CACTGCTGCATTTCTCCATCTTCTGGA  
SRR511920.403516.2- CACTGCTGCATTTCTCCATCTTCTGGA  
SRR511920.59478020.2- CACTGCTGCATTTCTCCATCTTCTGGA  
SRR511920.8740493.2- CACTGCTGCATTTCTCCATCTTCTGGA  
SRR516967.3860522.2+ CACTGCTGCATTTCTCCATCTTCTGGA  
SRR516974.66712393.1+ CACTGCTGCATTTCTCCATCTTCTGGA  
SRR516978.55364120.2- CACTGCTGCATTTCTCCATCTTCTGGA  
SRR516984.26297997.1+ CACTGCTGCATTTCTCCATCTTCTGGA  
SRR516999.58849034.2- CACTGCTGCATTTCTCCATCTTCTGGA  
SRR516999.76775311.2+ CACTGCTGCATTTCTCCATCTTCTGGA  
SRR517003.5667689.1- CACTGCTGCATTTCTCCATCTTCTGGA  
SRR517007.51506783.2+ CACTGCTGCATTTCTCCATCTTCTGGA  
SRR517008.35456369.2+ CACTGCTGCATTTCTCCATCTTCTGGA  
SRR517008.67351581.2+ CACTGCTGCATTTCTCCATCTTCTGGA  
SRR516967.71626809.2+ CACTGCTGCATTTCTCCATCTTCTGGA  
SRR516983.2660585.2+ CACTGCTGCATTTCTCCATCTTCTGGA  
SRR516983.34256945.1+ CACTGCTGCATTTCTCCATCTTCTGGA  
SRR516984.67024304.1- CACTGCTGCATTTCTCCATCTTCTGGA  
SRR516994.22273890.1+ CACTGCTGCATTTCTCCATCTTCTGGA  
SRR511911.14454908.2+ CACTGCTGCATTTCTCCATCTTCTGGA  
SRR516968.108115361.1+ CACTGCTGCATTTCTCCATCTTCTGGA  
SRR516973.1417145.2- CACTGCTGCATTTCTCCATCTTCTGGA  
SRR516973.1417146.2- CACTGCTGCATTTCTCCATCTTCTGGA  
SRR516991.89756659.2- CACTGCTGCATTTCTCCATCTTCTGGA  
SRR516992.7333033.1+ CACTGCTGCATTTCTCCATCTTCTGGA  
SRR516998.65411337.1+ CACTGCTGCATTTCTCCATCTTCTGGA  
SRR517006.59401473.1- CACTGCTGCATTTCTCCATCTTCTGGA  
SRR511914.85292277.1+ CACTGCTGCATTTCTCCATCTTCTGGA  
SRR516970.26934.1+ CACTGCTGCATTTCTCCATCTTCTGGA  
SRR516972.63489975.1+ CACTGCTGCATTTCTCCATCTTCTGGA  
SRR516974.43659576.1+ CACTGCTGCATTTCTCCATCTTCTGGA  
SRR516986.47033107.2+ CACTGCTGCATTTCTCCATCTTCTGGA  
SRR516988.14405849.2+ CACTGCTGCATTTCTCCATCTTCTGGA  
SRR516991.84387060.1+ CACTGCTGCATTTCTCCATCTTCTGGA  
SRR516993.73666384.1+ CACTGCTGCATTTCTCCATCTTCTGGA  
SRR516996.17100141.2- CACTGCTGCATTTCTCCATCTTCTGGA  
SRR516998.784538.1+ CACTGCTGCATTTCTCCATCTTCTGGA  
SRR517001.57642820.1+ CACTGCTGCATTTCTCCATCTTCTGGA  
SRR517008.22652667.1+ CACTGCTGCATTTCTCCATCTTCTGGA  
SRR511915.68961737.2+ CACTGCTGCATTTCTCCATCTTCTGGA  
SRR516974.46129857.2- CACTGCTGCATTTCTCCATCTTCTGGA  
SRR516992.26195657.2- CACTGCTGCATTTCTCCATCTTCTGGA  
SRR516994.51970256.2- CACTGCTGCATTTCTCCATCTTCTGGA  
SRR517002.87764725.1+ CACTGCTGCATTTCTCCATCTTCTGGA  
SRR517009.33285239.1+ CACTGCTGCATTTCTCCATCTTCTGGA  
SRR511915.72842805.1+ CACTGCTGCATTTCTCCATCTTCTGGA  
SRR511916.30499491.1- CACTGCTGCATTTCTCCATCTTCTGGA  
SRR511917.13648601.1- CACTGCTGCATTTCTCCATCTTCTGGA  
SRR516967.119505550.2- CACTGCTGCATTTCTCCATCTTCTGGA  
SRR516979.72185467.1- CACTGCTGCATTTCTCCATCTTCTGGA  
SRR516995.50080094.1+ CACTGCTGCATTTCTCCATCTTCTGGA  
SRR517006.37525580.1+ CACTGCTGCATTTCTCCATCTTCTGGA  
SRR517009.46221980.2+ CACTGCTGCATTTCTCCATCTTCTGGA  
SRR516972.26613549.2+ CACTGCTGCATTTCTCCATCTTCTGGA  
SRR516973.19319985.2+ CACTGCTGCATTTCTCCATCTTCTGGA  
SRR516983.80722236.2+ CACTGCTGCATTTCTCCATCTTCTGGA  
SRR511914.83943589.1- CACTGCTGCATTTCTCCATCTTCTGGA  
SRR516969.1709162.1- CACTGCTGCATTTCTCCATCTTCTGGA  
SRR516975.16339360.1+ CACTGCTGCATTTCTCCATCTTCTGGA  
SRR516993.45140548.2- CACTGCTGCATTTCTCCATCTTCTGGA  
SRR516996.39193734.1- CACTGCTGCATTTCTCCATCTTCTGGA  
SRR517008.15407290.1+ CACTGCTGCATTTCTCCATCTTCTGGA  
SRR511917.54558919.1- CACTGCTGCATTTCTCCATCTTCTGGA  
SRR516967.140688955.1+ CACTGCTGCATTTCTCCATCTTCTGGA  
SRR516973.17670450.1+ CACTGCTGCATTTCTCCATCTTCTGGA  
SRR516973.41289849.2+ CACTGCTGCATTTCTCCATCTTCTGGA  
SRR516981.50701184.1+ CACTGCTGCATTTCTCCATCTTCTGGA  
SRR516985.87014315.2- CACTGCTGCATTTCTCCATCTTCTGGA

SRR516990.1457908.1- CACTGCTGCATTTCTCCATCTTCTGGAGCCTACAAT  
SRR516992.74240970.2+ CACTGCTGCATTTCTCCATCTTCCGGGAGCCTACAAT  
SRR516995.57519330.1- CACTGCTGCGTTTCTCCATCTTCTGGAGCCTACAAT  
SRR516998.95947533.1+ CACTGCTGCGTTTCTCCATCTTCTGGAGCCTACAAT  
SRR517001.86378213.2- CACTGCTGCGTTTCTCCATCTTCTGGAGCCTACAAT  
SRR516982.12131511.1+ CACTGCTGCGTTTCTCCATCTTCTGGAGCCTACAATC  
SRR511911.2560931.2- CACTGCTGCATTTCTCCATCTTCTGGAGCCTACAATCA  
SRR516967.88384226.2+ CACTGCTGCGTTTCTCCATCTTCCGGGAGCCTACAATCA  
SRR516978.27059321.2+ CACTGCTGCATTTCTCCATCTTCTGGAGCCTACAATCA  
SRR516983.33407963.2+ CACTGCTGCGTTTCTCCATCTTCTGGAGCCTACAATCA  
SRR516984.90374479.1- CACTGCTGCATTTCTCCATCTTCTGGAGCCTACAATCA  
SRR516991.17053852.2+ CACTGCTGCATTTCTCCATCTTCTGGAGCCTACAATCA  
SRR516997.61814545.2+ CACTGCTGCATTTCTCCATCTTCTGGAGCCTACAATCA  
SRR516998.100162957.2- CACTGCTGCATTTCTCCATCTTCTGGAGCCTACAATCA  
SRR516998.14101174.1- CACTGCTGCATTTCTCCATCTTCTGGAGCCTACAATCA  
SRR517006.43830014.2+ CACTGCTGCATTTCTCCATCTTCTGGAGCCTACAATCA  
SRR516968.114845186.2- CACTGCTGCATTTCTCCATCTTCTGGAGCCTACAATCAT  
SRR516968.37738736.1- CACTGCTGCGTTTCTCCATCTTCTGGAGCCTACAATCAT  
SRR516973.53561779.1- CACTGCTGCGTTTCTCCATCTTCTGGAGCCTACAATCAT  
SRR516978.47021888.1+ CACTGCTGCGTTTCTCCATCTTCTGGAGCCTACAATCAT  
SRR516986.24845211.1- CACTGCTGCATTTCTCCATCTTCTGGAGCCTACAATCAT  
SRR516988.60315129.1- CACTGCTGCGTTTCTCCATCTTCTGGAGCCTACAATCAT  
SRR516999.52172306.2+ CACTGCTGCATTTCTCCATCTTCTGGAGCCTACAATCAT  
SRR517000.8953178.1+ CACTGCTGCATTTCTCCATCTTCTGGAGCCTACAATCAT  
SRR511892.28064592.1+ CACTGCTGCATTTCTCCATCTTCTGGAGCCTACAATCATG  
SRR511892.41096124.1+ CACTGCTGCATTTCTCCATCTTCTGGAGCCTACAATCATG  
SRR511918.3846685.1+ CACTGCTGCATTTCTCCATCTTCTGGAGCCTACAATCATG  
SRR516967.25613572.1- CACTGCTGCATTTCTCCATCTTCTGGAGCCTACAATCATG  
SRR516989.72004672.2+ CACTGCTGCATTTCTCCATCTTCTGGAGCCTACAATCATG  
SRR517000.44421459.2- CACTGCTGCGTTTCTCCATCTTCTGGAGCCTACAATCATG  
SRR517009.47221478.1+ CACTGCTGCGTTTCTCCATCTTCTGGAGCCTACAATCATG  
SRR516972.23056341.2+ CACTGCTGCATTTCTCCATCTTCTGGAGCCTACAATCATGG  
SRR516972.63004169.2+ CACTGCTGCATTTCTCCATCTTCTGGAGCCTACAATCATGG  
SRR516981.4191635.1+ CACTGCTGCATTTCTCCATCTTCTGGAGCCTACAATCATGG  
SRR516986.987228.1+ CACTGCTGCGTTTCTCCATCTTCTGGAGCCTACAATCATGG  
SRR516987.3530565.1- CACTGCTGCGTTTCTCCATCTTCTGGAGCCTACAATCATGA  
SRR516990.47650251.1+ CACTGCTGCATTTCTCCATCTTCTGGAGCCTACAATCATGG  
SRR511913.5587657.2+ CACTGCTGCATTTCTCCATCTTCTGGAGCCTACAATCATGGT  
SRR516968.109900230.1+ CACTGCTGCATTTCTCCATCTTCTGGAGCCTACAATCATGGT  
SRR516975.38510117.1+ CACTGCTGCATTTCTCCATCTTCTGGAGCCTACAATCATGGT  
SRR516978.25674765.2+ CACTGCTGCGTTTCTCCATCTTCTGGAGCCTACAATCATGGT  
SRR516983.15102679.2+ CACTGCTGCATTTCTCCATCTTCTGGAGCCTACAATCATGGT  
SRR516994.34198741.2- CACTGCTGCGTTTCTCCATCTTCTGGAGCCTACAATCATGGT  
SRR516997.43562335.1+ CACTGCTGCGTTTCTCCATCTTCTGGAGCCTACAATCATGAT  
SRR516997.84310008.2+ CACTGCTGCGTTTCTCCATCTTCTGGAGCCTACAATCATGAT  
SRR516999.85502800.1- CCCTGCTGCATTTCTCCATCTTCTGGAGCCTACAATCATGGT  
SRR517005.97398522.1+ CACTGCTGCATTTCTCCATCTTCTGGAGCCTACAATCATGGT  
SRR516967.113781662.1+ CACTGCTGCATTTCTCCATCTTCTGGAGCCTACAATCATGGTT  
SRR516967.75977499.2- CACTGCTGCATTTCTCCATCTTCTGGAGCCTACAATCATGGTT  
SRR516968.13503998.1- CACTGCTGCGTTTCTCCATCTTCTGGAGCCTACAATCATGGTT  
SRR516970.33702206.1- CACTGCTGCGTTTCTCCATCTTCTGGAGCCTACAATCATGGTT  
SRR516972.63924756.1+ CACTGCTGCATTTCTCCATCTTCTGGAGCCTACAATCATGGTT  
SRR516985.13798813.2- CACTGCTGCGTTTCTCCATCTTCTGGAGCCTACAATCATGGTT  
SRR516985.51865401.1+ CACTGCTGCGTTTCTCCATCTTCTGGAGCCTACAATCATGGTT  
SRR516993.69967585.2+ CACTGCTGCGTTTCTCCATCTTCTGGAGCCTACACTCATGGTT  
SRR516995.78799244.2+ CACTGCTGCGTTTCTCCATCTTCTGGAGCCTACAATCATGGTT  
SRR517005.13267808.2+ CACTGCTGCATTTCTCCATCTTCTGGAGCCTACAATCATGGTT  
SRR516980.32139732.1+ CACTGCTGCGTTTCTCCATCTTCTGGAGCCTACAATCATGGTTT  
SRR516981.35675221.2- CACTGCTGCATTTCTCCATCTTCTGGAGCCTACAATCATGGTTT  
SRR516991.64036010.1+ CACTGCTGCGTTTCTCCATCTTCTGGAGCCTACAATCATGATTT  
SRR516992.27044560.2+ CACTGCTGCATTTCTCCATCTTCTGGAGCCTACAATCATGTTT  
SRR516994.58264551.2+ CACTGCTGCGTTTCTCCATCTTCTGGAGCCTACAATCATGTTT  
SRR516996.11016954.1+ CACTGCTGCATTTCTCCATCTTCTGGAGCCTACAATCATGTTT  
SRR516999.1643008.1- CACTGCTGCATTTCTCCATCTTCTGGAGCCTACAATCATGTTT  
SRR516999.85502801.1- CACTGCTGCATTTCTCCATCTTCTGGAGCCTACAATCATGTTT  
SRR517004.61579126.2+ CACTGCTGCGTTTCTCCATCTTCTGGAGCCTACAATCATGTTT  
SRR511892.39300111.2+ CACTGCTGCATTTCTCCATCTTCTGGAGCCTACAATCATGTTT  
SRR511918.10389351.2- CACTGCTGCATTTCTCCATCTTCTGGAGCCTACAATCATGTTT  
SRR511918.19943510.2- CACTGCTGCATTTCTCCATCTTCTGGAGCCTACAATCATGTTT  
SRR511918.26089337.2- CACTGCTGCATTTCTCCATCTTCTGGAGCCTACAATCATGTTT  
SRR516967.692820.1+ CACTGCTGCATTTCTCCATCTTCTGGAGCCTACAATCATGTTT  
SRR516977.50716105.1- CACTGCTGCGTTTCTCCATCTTCTGGAGCCTACAATCATGTTT  
SRR516979.5196665.1+ CACTGCTGCGTTTCTCCATCTTCTGGAGCCTACAATCATGTTT  
SRR516993.85753445.2- CACTGCTGCGTTTCTCCATCTTCTGGAGCCTACAATCATGTTT  
SRR516997.91295456.2- CACTGCTGCATTTCTCCATCTTCTGGAGCCTACAATCATGTTT  
SRR511914.74202240.2+ CACTGCTGCATTTCTCCATCTTCTGGAGCCTACAATCATGTTT  
SRR511914.74202383.2+ CACTGCTGCATTTCTCCATCTTCTGGAGCCTACAATCATGTTT  
SRR511915.77154079.1+ CACTGCTGCATTTCTCCATCTTCTGGAGCCTACAATCATGTTT  
SRR516967.143302175.2- CACTGCTGCATTTCTCCATCTTCTGGAGCCTACAATCATGTTT  
SRR516993.25377542.2- CACTGCTGCGTTTCTCCATCTTCTGGAGCCTACAATCATGTTT  
SRR516998.23421238.1- CACTGCTGCATTTCTCCATCTTCTGGAGCCTACAATCATGTTT  
SRR517000.38312514.2+ CACTGCTGCATTTCTCCATCTTCTGGAGCCTACAATCATGTTT  
SRR517003.87401309.2+ CACTGCTGCATTTCTCCATCTTCTGGAGCCTACAATCATGTTT  
SRR516967.3323960.1+ CACTGCTGCATTTCTCCATCTTCTGGAGCCTACAATCATGTTT

SRR516971.33071473.1+ CACTGCTGCGTTTTCTCCATCTTCTGGAGCCTACAATCATGGTTTACC  
SRR516982.63179189.1- CACTGCTGCGTTTTCTCCATCTTCTGGAGCCTACAATCATGGTTTACC  
SRR517000.55314048.2- CACTGCTGCATTTCTCCATCTTCTGGAGCCTACAATCATGGTTTACC  
SRR516967.51922488.1+ CACTGCTGCATTTCTCCATCTTCTGGAGCCTACAATCATGGTTTACC  
SRR516967.66315071.1+ CACTGCTGCATTTCTCCATCTTCTGGAGCCTACAATCATGGTTTACC  
SRR516974.55348987.1- CACTGCTGCATTTCTCCATCTTCTGGAGCCTACAATCATGGTTTACC  
SRR516992.48824419.1- CACTGCTGCGTTTTCTCCATCTTCTGGAGCCTACAATCATGGTTTACC  
SRR516994.12134146.1- CACTGCTGCGTTTTCTCCATCTTCTGGAGCCTACAATCATGGTTTACC  
SRR516995.10684909.1+ CACTGCTGCGTTTTCTCCATCTTCTGGAGCCTACAATCATGGTTTACC  
SRR516999.103440235.2+ CACTGCTGCATTTCTCCATCTTCTGGAGCCTACAATCATGGTTTACC  
SRR516999.10410465.2- CACTGCTGCATTTCTCCATCTTCTGGAGCCTACAATCATGGTTTACC  
SRR517000.64874633.2+ CACTGCTGCGTTTTCTCCATCTTCTGGAGCCTACAATCATGGTTTACC  
SRR517003.26284114.2+ CACTGCTGCGTTTTCTCCATCTTCTGGAGCCTACAATCATGGTTTACC  
SRR517003.71529016.1- CACTGCTGCGTTTTCTCCATCTTCTGGAGCCTACAATCATGGTTTACC  
SRR511912.43117119.2+ CACTGCTGCATTTCTCCATCTTCTGGAGCCTACAATCATGGTTTACC  
SRR511915.70587641.1- CACTGCTGCATTTCTCCATCTTCTGGAGCCTACAATCATGGTTTACC  
SRR511915.70587944.1- CACTGCTGCATTTCTCCATCTTCTGGAGCCTACAATCATGGTTTACC  
SRR516973.14872432.2+ CACTGCTGCATTTCTCCATCTTCTGGAGCCTACAATCATGGTTTACC  
SRR516974.65117480.1+ CACTGCTGCATTTCTCCATCTTCTGGAGCCTACAATCATGGTTTACC  
SRR516976.8246559.2+ CACTGCTGCGTTTTCTCCATCTTCTGGAGCCTACAATCATGGTTTACC  
SRR516986.40277712.2+ CACTGCTGCATTTCTCCATCTTCTGGAGCCTACAATCATGGTTTACC  
SRR516989.35030363.2- CACTGCTGCTTTTTCTCCATCTTCTGGAGCCTACAATCATGGTTTACC  
SRR517001.76210543.1+ CACTGCTGCGTTTTCTCCATCTTCTGGAGCCTACAATCATGGTTTACC  
SRR511892.65397717.2+ CACTGCTGCATTTCTCCATCTTCTGGAGCCTACAATCATGGTTTACC  
SRR516971.18124229.1- CACTGCTGCGTTTTCTCCATCTTCTGGAGCCTACAATCATGGTTTACC  
SRR516972.31596629.1- CACTGCTGCATTTCTCCATCTTCTGGAGCCTACAATCATGGTTTACC  
SRR516972.85177199.1+ CACTGCTGCATTTCTCCATCTTCTGGAGCCTACAATCATGGTTTACC  
SRR516978.40529185.1- CACTGCTGCGTTTTCTCCATCTTCTGGAGCCTACAATCATGGTTTACC  
SRR516988.42046286.1+ CACTGCTGCGTTTTCTCCATCTTCTGGAGCCTACAATCATGGTTTACC  
SRR516992.573765.1- CACTGCTGCATTTCTCCATCTTCTGGAGCCTACAATCATGGTTTACC  
SRR516993.28392126.2- CACTGCTGCGTTTTCTCCATCTTCTGGAGCCTACAATCATGGTTTACC  
SRR517002.75362667.2- CACTGCTGCATTTCTCCATCTTCTGGAGCCTACAATCATGGTTTACC  
SRR511892.37274156.1+ CACTGCTGCATTTCTCCATCTTCTGGAGCCTACAATCATGGTTTACC  
SRR511911.71659560.1- CACTGCTGCATTTCTCCATCTTCTGGAGCCTACAATCATGGTTTACC  
SRR516973.46174374.2- CACTGCTGCATTTCTCCATCTTCTGGAGCCTACAATCATGGTTTACC  
SRR516978.2051635.2+ CACTGCTGCGTTTTCTCCATCTTCTGGAGCCTACAATCATGGTTTACC  
SRR516978.9550445.2- CACTGCTGCGTTTTCTCCATCTTCTGGAGCCTACAATCATGGTTTACC  
SRR516983.77073621.2+ CACTGCTGCATTTCTCCATCTTCTGGAGCCTACAATCATGGTTTACC  
SRR516985.42939042.2+ CACTGCTGCGTTTTCTCCATCTTCTGGAGCCTACAATCATGGTTTACC  
SRR517001.74321810.2+ CACTGCTGCGTTTTCTCCATCTTCTGGAGCCTACAATCATGGTTTACC  
SRR517004.29961337.2- CACTGCTGCGTTTTCTCCATCTTCTGGAGCCTACAATCATGGTTTACC  
SRR517006.172048.1- CACTGCTGCATTTCTCCATCTTCTGGAGCCTACAATCATGGTTTACC  
SRR517007.20420514.2+ CACTGCTGCATTTCTCCATCTTCTGGAGCCTACAATCATGGTTTACC  
SRR516972.64059213.1- CACTGCTGCATTTCTCCATCTTCTGGAGCCTACAATCATGGTTTACC  
SRR516974.65696664.1+ CACTGCTGCGTTTTCTCCATCTTCTGGAGCCTACAATCATGGTTTACC  
SRR516977.4731991.2+ CACTGCTGCGTTTTCTCCATCTTCTGGAGCCTACAATCATGGTTTACC  
SRR516985.18999080.2+ CACTGCTGCGTTTTCTCCATCTTCTGGAGCCTACAATCATGGTTTACC  
SRR516985.37325423.1+ CACTGCTGCGTTTTCTCCATCTTCTGGAGCCTACAATCATGGTTTACC  
SRR516993.30875953.1+ CACTGCTGCGTTTTCTCCATCTTCTGGAGCCTACAATCATGGTTTACC  
SRR517000.62796423.1+ CACTGCTGCATTTCTCCATCTTCTGGAGCCTACAATCATGGTTTACC  
SRR517003.52120889.1- CACTGCTGCATTTCTCCATCTTCTGGAGCCTACAATCATGGTTTACC  
SRR517005.98675652.1+ CACTGCTGCGTTTTCTCCATCTTCTGGAGCCTACAATCATGGTTTACC  
SRR517008.63673114.2- CACTGCTGCGTTTTCTCCATCTTCTGGAGCCTACAATCATGGTTTACC  
SRR511915.38060972.2+ CACTGCTGCATTTCTCCATCTTCTGGAGCCTACAATCATGGTTTACC  
SRR516972.52377834.2- CACTGCTGCATTTCTCCATCTTCTGGAGCCTACAATCATGGTTTACC  
SRR516975.50269754.2+ CACTGCTGCATTTCTCCATCTTCTGGAGCCTACAATCATGGTTTACC  
SRR516981.37293974.2+ CACTGCTGCATTTCTCCATCTTCTGGAGCCTACAATCATGGTTTACC  
SRR516984.12015783.2+ CACTGCTGCGTTTTCTCCATCTTCTGGAGCCTACAATCATGGTTTACC  
SRR516991.78169676.2+ CACTGCTGCGTTTTCTCCATCTTCTGGAGCCTACAATCATGGTTTACC  
SRR516998.99573345.2+ CACTGCTGCATTTCTCCATCTTCTGGAGCCTACAATCATGGTTTACC  
SRR517000.62408706.2+ CACTGCTGCGTTTTCTCCATCTTCTGGAGCCTACAATCATGGTTTACC  
SRR517004.44571193.1+ CACTGCTGCGTTTTCTCCATCTTCTGGAGCCTACAATCATGGTTTACC  
SRR517004.7608079.2+ CACTGCTGCGTTTTCTCCATCTTCTGGAGCCTACAATCATGGTTTACC  
SRR511892.45941781.2- CACTGCTGCATTTCTCCATCTTCTGGAGCCTACAATCATGGTTTACC  
SRR516977.51389208.2+ CACTGCTGCGTTTTCTCCATCTTCTGGAGCCTACAATCATGGTTTACC  
SRR516991.90343348.1+ CACTGCTGCGTTTTCTCCATCTTCTGGAGCCTACAATCATGGTTTACC  
SRR516996.61810277.2- CACTGCTGCATTTCTCCATCTTCTGGAGCCTACAATCATGGTTTACC  
SRR516998.25981085.1- CACTGCTGCATTTCTCCATCTTCTGGAGCCTACAATCATGGTTTACC  
SRR517001.47934217.2+ CACTGCTGCGTTTTCTCCATCTTCTGGAGCCTACAATCATGGTTTACC  
SRR517002.20414411.2- CACTGCTGCATTTCTCCATCTTCTGGAGCCTACAATCATGGTTTACC  
SRR517005.84338736.2- CACTGCTGCATTTCTCCATCTTCTGGAGCCTACAATCATGGTTTACC  
SRR516978.3904335.2+ CACTGCTGCGTTTTCTCCATCTTCTGGAGCCTACAATCATGGTTTACC  
SRR516980.55772569.1+ CACTGCTGCGTTTTCTCCATCTTCTGGAGCCTACAATCATGGTTTACC  
SRR516983.11462340.1+ CACTGCTGCATTTCTCCATCTTCTGGAGCCTACAATCATGGTTTACC  
SRR516998.602129.1+ CACTGCTGCATTTCTCCATCTTCTGGAGCCTACAATCATGGTTTACC  
SRR516999.110390232.2+ CACTGCTGCATTTCTCCATCTTCTGGAGCCTACAATCATGGTTTACC  
SRR517002.59657103.2+ CACTGCTGCATTTCTCCATCTTCTGGAGCCTACAATCATGGTTTACC  
SRR511892.53930910.1- CACTGCTGCATTTCTCCATCTTCTGGAGCCTACAATCATGGTTTACC  
SRR511911.38218078.1+ CACTGCTGCATTTCTCCATCTTCTGGAGCCTACAATCATGGTTTACC  
SRR511911.45879133.2- CACTGCTGCATTTCTCCATCTTCTGGAGCCTACAATCATGGTTTACC  
SRR511913.35212029.2- CACTGCTGCATTTCTCCATCTTCTGGAGCCTACAATCATGGTTTACC  
SRR516967.14216035.1- CACTGCTGCATTTCTCCATCTTCTGGAGCCTACAATCATGGTTTACC  
SRR516968.120253034.1- CACTGCTGCATTTCTCCATCTTCTGGAGCCTACAATCATGGTTTACC  
SRR516971.10078918.1+ CACTGCTGCGTTTTCTCCATCTTCTGGAGCCTACAATCATGGTTTACC

SRR516986.3278042.1+ CACTGCTGCATTTCTCCATCTTCTGGAGCCTACAATCATGGTTTACCTCTGCTGAG  
SRR516987.11536053.2+ CACTGCTGCATTTCTCCATCTTCTGGAGCCTACAATCATGGTTTACCTCTGCTGAG  
SRR516988.19872809.2- CACTGCTGCATTTCTCCATCTTCTGGAGCCTACAATCATGGTTTACCTCTGCTGAG  
SRR516989.88613591.1- CACTGCTGCATTTCTCCATCTTCTGGAGCCTACAATCATGGTTTACCTCTGCTGAG  
SRR516994.39637294.1+ CACTGCTGCATTTCTCCATCTTCTGGAGCCTACAATCATGGTTTACCTCTGCTGAG  
SRR517001.54436281.1+ CACTGCTGCATTTCTCCATCTTCTGGAGCCTACAATCATGGTTTACCTCTGCTGAG  
SRR517002.22893072.1- CACTGCTGCATTTCTCCATCTTCTGGAGCCTACAATCATGGTTTACCTCTGCTGAG  
SRR517002.72952186.2+ CACTGCTGCATTTCTCCATCTTCTGGAGCCTACAATCATGGTTTAACTCTGCTGAG  
SRR517005.31804048.2+ CACTGCTGCATTTCTCCATCTTCTGGAGCCTACAATCATGGTTTACCTCTGCTGAG  
SRR517009.24352435.2- CACTGCTGCATTTCTCCATCTTCTGGAGCCTACAATCATGGTTTACCTCTGCTGAG  
SRR511892.24906029.1- CACTGCTGCATTTCTCCATCTTCTGGAGCCTACAATCATGGTTTACCTCTGCTGAGA  
SRR511912.52540950.1+ CACTGCTGCATTTCTCCATCTTCTGGAGCCTACAATCATGGTTTACCTCTGCTGAGA  
SRR511913.44631486.2+ CACTGCTGCATTTCTCCATCTTCTGGAGCCTACAATCATGGTTTACCTCTGCTGAGA  
SRR516967.2436532.1+ CACTGCTGCATTTCTCCATCTTCTGGAGCCTACAATCATGGTTTACCTCTGCTGAGA  
SRR516985.49238935.1- CACTGCTGCATTTCTCCATCTTCTGGAGCCTACAATCATGGTTTACCTCTGCTGAGA  
SRR516991.10395258.2+ CACTGCTGCATTTCTCCATCTTCTGGAGCCTACAATCATGGTTTACCTCTGCTGAGA  
SRR516999.61931820.2+ CACTGCTGCATTTCTCCATCTTCTGGAGCCTACAATCATGGTTTACCTCTGCTGAGA  
SRR516999.79892526.2- CACTGCTGCATTTCTCCATCTTCTGGAGCCTACAATCATGGTTTACCTCTGCTGAGA  
SRR511915.51707777.1- CACTGCTGCATTTCTCCATCTTCTGGAGCCTACAATCATGGTTTACCTCTGCTGAGAC  
SRR516974.62115179.1+ CACTGCTGCATTTCTCCATCTTCTGGAGCCTACAATCATGGTTTACCTCTGCTGAGAC  
SRR516991.23709560.2- CACTGCTGCATTTCTCCATCTTCTGGAGCCTACAATCATGGTTTACCTCTGCTGAGAC  
SRR516992.64410587.2+ CACTGCTGCATTTCTCCATCTTCTGGAGCCTACAATCATGGTTTACCTCTGCTGAGAC  
SRR517000.60951698.1+ CACTGCTGCATTTCTCCATCTTCTGGAGCCTACAATCATGGTTTACCTCTGCTGAGAC  
SRR517009.21051867.2+ CACTGCTGCATTTCTCCATCTTCTGGAGCCTACAATCATGGTTTACCTCTGCTGAGAC  
SRR511892.22200889.1+ CACTGCTGCATTTCTCCATCTTCTGGAGCCTACAATCATGGTTTACCTCTGCTGAGACC  
SRR511892.22460703.2- CACTGCTGCATTTCTCCATCTTCTGGAGCCTACAATCATGGTTTACCTCTGCTGAGACC  
SRR511892.25732978.1- CACTGCTGCATTTCTCCATCTTCTGGAGCCTACAATCATGGTTTACCTCTGCTGAGACC  
SRR511892.28500594.2- CACTGCTGCATTTCTCCATCTTCTGGAGCCTACAATCATGGTTTACCTCTGCTGAGACC  
SRR511892.35285726.1- CACTGCTGCATTTCTCCATCTTCTGGAGCCTACAATCATGGTTTACCTCTGCTGAGACC  
SRR511892.42564732.1+ CACTGCTGCATTTCTCCATCTTCTGGAGCCTACAATCATGGTTTACCTCTGCTGAGACC  
SRR511892.56496978.2+ CACTGCTGCATTTCTCCATCTTCTGGAGCCTACAATCATGGTTTACCTCTGCTGAGACC  
SRR511892.6007403.2+ CACTGCTGCATTTCTCCATCTTCTGGAGCCTACAATCATGGTTTACCTCTGCTGAGACC  
SRR511892.63390781.1+ CACTGCTGCATTTCTCCATCTTCTGGAGCCTACAATCATGGTTTACCTCTGCTGAGACC  
SRR511892.64175574.1+ CACTGCTGCATTTCTCCATCTTCTGGAGCCTACAATCATGGTTTACCTCTGCTGAGACC  
SRR511911.13404865.1- CACTGCTGCATTTCTCCATCTTCTGGAGCCTACAATCATGGTTTACCTCTGCTGAGACC  
SRR511911.36873194.2+ CACTGCTGCATTTCTCCATCTTCTGGAGCCTACAATCATGGTTTACCTCTGCTGAGACC  
SRR511911.48293933.2- CACTGCTGCATTTCTCCATCTTCTGGAGCCTACAATCATGGTTTACCTCTGCTGAGACC  
SRR511911.53964321.1- CACTGCTGCATTTCTCCATCTTCTGGAGCCTACAATCATGGTTTACCTCTGCTGAGACC  
SRR511911.7460180.2+ CACTGCTGCATTTCTCCATCTTCTGGAGCCTACAATCATGGTTTACCTCTGCTGAGACC  
SRR511912.25061802.2+ CACTGCTGCATTTCTCCATCTTCTGGAGCCTACAATCATGGTTTACCTCTGCTGAGACC  
SRR511912.3464697.2- CACTGCTGCATTTCTCCATCTTCTGGAGCCTACAATCATGGTTTGCCTCTGCTGAGACC  
SRR511912.40363221.2+ CACTGCTGCATTTCTCCATCTTCTGGAGCCTACAATCATGGTTTACCTCTGCTGAGACC  
SRR511912.51896762.2+ CACTGCTGCATTTCTCCATCTTCTGGAGCCTACAATCATGGTTTACCTCTGCTGAGACC  
SRR511912.67114670.1+ CACTGCTGCATTTCTCCATCTTCTGGAGCCTACAATCATGGTTTACCTCTGCTGAGACC  
SRR511912.71061316.2+ CACTGCTGCATTTCTCCATCTTCTGGAGCCTACAATCATGGTTTACCTCTGCTGAGACC  
SRR511912.78794364.2- CACTGCTGCATTTCTCCATCTTCTGGAGCCTACAATCATGGTTTACCTCTGCTGAGACC  
SRR511912.83753137.1- CACTGCTGCATTTCTCCATCTTCTGGAGCCTACAATCATGGTTTACCTCTGCTGAGACC  
SRR511913.30633233.1+ CACTGCTGCATTTCTCCATCTTCTGGAGCCTACAATCATGGTTTACCTCTGCTGAGACC  
SRR511913.46683201.1- CACTGCTGCATTTCTCCATCTTCTGGAGCCTACAATCATGGTTTACCTCTGCTGAGACC  
SRR511913.52630668.1+ CACTGCTGCATTTCTCCATCTTCTGGAGCCTACAATCATGGTTTACCTCTGCTGAGACC  
SRR511913.54466415.2- CACTGCTGCATTTCTCCATCTTCTGGAGCCTACAATCATGGTTTACCTCTGCTGAGACC  
SRR511913.70659514.2- CACTGCTGCATTTCTCCATCTTCTGGAGCCTACAATCATGGTTTACCTCTGCTGAGACC  
SRR511913.72818344.2- CACTGCTGCATTTCTCCATCTTCTGGAGCCTACAATCATGGTTTACCTCTGCTGAGACC  
SRR511913.74026630.2+ CACTGCTGCATTTCTCCATCTTCTGGAGCCTACAATCATGGTTTACCTCTGCTGAGACC  
SRR511914.2434148.2- CACTGCTGCATTTCTCCATCTTCTGGAGCCTACAATCATGGTTTACCTCTGCTGAGACC  
SRR511914.49593496.1- CACTGCTGCATTTCTCCATCTTCTGGAGCCTACAATCATGGTTTACCTCTGCTGAGACC  
SRR511914.66457590.1+ CACTGCTGCATTTCTCCATCTTCTGGAGCCTACAATCATGGTTTACCTCTGCTGAGACC  
SRR511914.67737508.2+ CACTGCTGCATTTCTCCATCTTCTGGAGCCTACAATCATGGTTTACCTCTGCTGAGACC  
SRR511914.67737642.2+ CACTGCTGCATTTCTCCATCTTCTGGAGCCTACAATCATGGTTTACCTCTGCTGAGACC  
SRR511914.68003041.1- CACTGCTGCATTTCTCCATCTTCTGGAGCCTACAATCATGGTTTACCTCTGCTGAGACC  
SRR511914.68550111.1- CACTGCTGCATTTCTCCATCTTCTGGAGCCTACAATCATGGTTTACCTCTGCTGAGACC  
SRR511914.68550259.1- CACTGCTGCATTTCTCCATCTTCTGGAGCCTACAATCATGGTTTACCTCTGCTGAGACC  
SRR511915.30420375.2- CACTGCTGCATTTCTCCATCTTCTGGAGCCTACAATCATGGTTTACCTCTGCTGAGACC  
SRR511915.45075036.2+ CACTGCTGCATTTCTCCATCTTCTGGAGCCTACAATCATGGTTTACCTCTGCTGAGACC  
SRR516967.13632766.2+ CACTGCTGCATTTCTCCATCTTCTGGAGCCTACAATCATGGTTTACCTCTGCTGAGACC  
SRR516967.20886732.1+ CACTGCTGCATTTCTCCATCTTCTGGAGCCTACAATCATGGTTTACCTCTGCTGAGACC  
SRR516967.56639881.1+ CACTGCTGCATTTCTCCATCTTCTGGAGCCTACAATCATGGTTTACCTCTGCTGAGACC  
SRR516968.125235180.1- CACTGCTGCATTTCTCCATCTTCTGGAGCCTACAATCATGGTTTACCTCTGCTGAGACC  
SRR516968.170088452.1- CACTGCTGCATTTCTCCATCTTCTGGAGCCTACAATCATGGTTTACCTCTGCTGAGACC  
SRR516968.179954570.2- CACTGCTGCATTTCTCCATCTTCTGGAGCCTACAATCATGGTTTACCTCTGCTGAGACC  
SRR516968.37214890.1+ CACTGCTGCATTTCTCCATCTTCTGGAGCCTACAGTCATGGTTTACCTCTGCTGAGACC  
SRR516968.42660308.2+ CACTGCTGCATTTCTCCATCTTCTGGAGCCTACAATCATGGTTTACCTCTGCTGAGACC  
SRR516968.7574142.1+ CACTGCTGCATTTCTCCATCTTCTGGAGCCTACAATCATGGTTTACCTCTGCTGAGACC  
SRR516968.75914217.2- CACTGCTGCATTTCTCCATCTTCTGGAGCCTACAATCATGGTTTACCTCTGCTGAGACC  
SRR516968.78983771.2+ CACTGCTGCATTTCTCCATCTTCTGGAGCCTACAATCATGGTTTACCTCTGCTGAGACC  
SRR516968.81828792.2+ CACTGCTGCATTTCTCCATCTTCTGGAGCCTACAATCATGGTTTACCTCTGCTGAGACC  
SRR516968.96419618.2+ CACTGCTGCATTTCTCCATCTTCTGGAGCCTACAATCATGGTTTACCTCTGCTGAGACC  
SRR516969.19690168.1- CACTGCTGCATTTCTCCAGCTTCTGGAGCCTACAATCATGGTTTACCTCTGCTGAGACC  
SRR516970.28438184.2+ CACTGCTGCATTTCTCCATCTTCTGGAGCCTACAATCATGGTTTACCTCTGCTGAGACC  
SRR516970.9984608.2- CACTGCTGCATTTCTCCATCTTCTGGAGCCTACAATCATGGTTTACCTCTGCTGAGACC  
SRR516971.1149505.2+ CACTGCTGCATTTCTCCATCTTCTGGAGCCTACAATCATGGTTTACCTCTGCTGAGACC  
SRR516971.36450695.2+ CACTGCTGCATTTCTCCATCTTCTGGAGCCTACAATCATGGTTTACCTCTGCTGAGACC  
SRR516971.818087.2- CACTGCTGCATTTCTCCATCTTCTGGAGCCTACAATCATGGTTTACCTCTGCTGAGACC  
SRR516972.40257819.2+ CACTGCTGCATTTCTCCATCTTCTGGAGCCTACAATCATGGTTTACCTCTGCTGAGACC

SRR516972.46769474.2+ CACTGCTGCATTTCTCCATCTTCTGGAGCCTACAATCATGGTTTACCTCTGCTGAGACC  
SRR516972.63526588.1- CACTGCTGCATTTCTCCATCTTCTGGAGCCTACAATCATGGTTTACCTCTGCTGAGACC  
SRR516972.66728747.1- CACTGCTGCATTTCTCCATCTTCTGGAGCCTACAATCATGGTTTACCTCTGCTGAGACC  
SRR516972.7252980.1- CACTGCTGCATTTCTCCATCTTCTGGAGCCTACAATCATGGTTTACCTCTGCTGAGACC  
SRR516973.2205347.2- CACTGCTGCATTTCTCCATCTTCTGGAGCCTACAATCATGGTTTACCTCTGCTGAGACC  
SRR516973.26618435.2+ CACTGCTGCATTTCTCCATCTTCTGGAGCCTACAATCATGGTTTACCTCTGCTGAGACC  
SRR516973.44104519.1- CACTGCTGCATTTCTCCATCTTCTGGAGCCTACAATCATGGTTTACCTCTGCTGAGACC  
SRR516974.18523926.1+ CACTGCTGCATTTCTCCATCTTCTGGAGCCTACAATCATGGTTTACCTCTGCTGAGACC  
SRR516974.34088399.1+ CACTGCTGCATTTCTCCATCTTCTGGAGCCTACAATCATGGTTTACCTCTGCTGAGACC  
SRR516975.14717207.2- CACTGCTGCATTTCTCCATCTTCTGGAGCCTACAATCATGGTTTACCTCTGCTGAGACC  
SRR516975.29998471.1+ CACTGCTGCATTTCTCCATCTTCTGGAGCCTACAATCATGGTTTACCTCTGCTGAGACC  
SRR516975.41667615.2- CACTGCTGCATTTCTCCATCTTCTGGAGCCTACAATCATGGTTTACCTCTGCTGAGACC  
SRR516975.42749277.1- CACTGCTGCATTTCTCCATCTTCTGGAGCCTACAATCATGGTTTACCTCTGCTGAGACC  
SRR516975.50255788.1- CACTGCTGCATTTCTCCATCTTCTGGAGCCTACAATCATGGTTTACCTCTGCTGAGACC  
SRR516975.59671997.1+ CACTGCTGCATTTCTCCATCTTCTGGAGCCTACAATCATGGTTTACCTCTGCTGAGACC  
SRR516976.15724427.2+ CACTGCTGCATTTCTCCATCTTCTGGAGCCTACAATCATGGTTTACCTCTGCTGAGACC  
SRR516976.35412479.1- CACTGCTGCATTTCTCCATCTTCTGGAGCCTACAATCATGGTTTACCTCTGCTGAGACC  
SRR516976.3885854.1- CACTGCTGCATTTCTCCAGTTTCTGGAGCCTACAATCATGGTTTACCTCTGCTGAGACC  
SRR516976.50060483.1+ CACTGCTGCATTTCTCCATCTTCTGGAGCCTACAATCATGGTTTACCTCTGCTGAGACC  
SRR516978.13762672.2+ CACTGCTGCATTTCTCCATCTTCTGGAGCCTACAATCATGGTTTACCTCTGCTGAGACC  
SRR516978.43361919.1- CACTGCTGCATTTCTCCATCTTCTGGAGCCTACAATCATGGTTTACCTCTGCTGAGACC  
SRR516978.51856587.2- CACTGCTGCATTTCTCCATCTTCTGGAGCCTACAATCATGGTTTACCTCTGCTGAGACC  
SRR516978.54979818.2- CACTGCTGCATTTCTCCATCTTCTGGAGCCTACAATCATGGTTTACCTCTGCTGAGACC  
SRR516978.65142163.2+ CACTGCTGCATTTCTCCATCTTCTGGAGCCTACAATCATGGTTTACCTCTGCTGAGACC  
SRR516978.68244002.1+ CACTGCTGCATTTCTCCATCTTCTGGAGCCTACAATCATGGTTTACCTCTGCTGAGACC  
SRR516978.70371063.2- CACTGCTGCATTTCTCCATCTTCTGGAGCCTACAATCATGGTTTACCTCTGCTGAGACC  
SRR516978.76490935.1- CACTGCTGCATTTCTCCATCTTCTGGAGCCTACAATCATGGTTTACCTCTGCTGAGACC  
SRR516979.13778629.2+ CACTGCTGCATTTCTCCATCTTCTGGAGCCTACAATCATGGTTTACCTCTGCTGAGACC  
SRR516979.15989227.1- CACTGCTGCATTTCTCCATCTTCTGGAGCCTACAATCATGGTTTACCTCTGCTGAGACC  
SRR516979.22734254.1+ CACTGCTGCATTTCTCCATCTTCTGGAGCCTACAATCATGGTTTACCTCTGCTGAGACC  
SRR516979.54060768.1- CACTGCTGCATTTCTCCATCTTCTGGAGCCTACAATCATGGTTTACCTCTGCTGAGACC  
SRR516979.70135575.2+ CACTGCTGCATTTCTCCATCTTCTGGAGCCTACAATCATGGTTTACCTCTGCTGAGACC  
SRR516980.26511072.2- CACTGCTGCATTTCTCCATCTTCTGGAGCCTACAATCATGGTTTACCTCTGCTGAGACC  
SRR516980.56485916.1+ CACTGCTGCATTTCTCCATCTTCTGGAGCCTACAATCATGGTTTACCTCTGCTGAGACC  
SRR516980.641302.1- CACTGCTGCATTTCTCCATCTTCTGGAGCCTACAATCATGGTTTACCTCTGCTGAGACC  
SRR516981.51713088.2- CACTGCTGCATTTCTCCATCTTCTGGAGCCTACAATCATGGTTTACCTCTGCTGAGACC  
SRR516981.64156231.1- CACTGCTGCATTTCTCCATCTTCTGGAGCCTACAATCATGGTTTACCTCTGCTGAGACC  
SRR516981.71035524.1- CACTGCTGCATTTCTCCATCTTCTGGAGCCTACAATCATGGTTTACCTCTGCTGAGACC  
SRR516982.11686504.2- CACTGCTGCATTTCTCCATCTTCTGGAGCCTACAATCATGGTTTACCTCTGCTGAGACC  
SRR516982.20957450.2+ CACTGCTGCATTTCTCCATCTTCTGGAGCCTACAATCATGGTTTACCTCTGCTGAGACC  
SRR516982.57333576.1- CACTGCTGCATTTCTCCATCTTCTGGAGCCTACAATCATGGTTTACCTCTGCTGAGACC  
SRR516982.62820607.2+ CACTGCTGCATTTCTCCATCTTCTGGAGCCTACAATCATGGTTTACCTCTGCTGAGACC  
SRR516982.7942053.2- CACTGCTGCATTTCTCCATCTTCTGGAGCCTACAATCATGGTTTACCTCTGCTGAGACC  
SRR516983.22296978.1- CACTGCTGCATTTCTCCATCTTCTGGAGCCTACAATCATGGTTTACCTCTGCTGAGACC  
SRR516983.26943128.1- CACTGCTGCATTTCTCCATCTTCTGGAGCCTACAATCATGGTTTACCTCTGCTGAGACC  
SRR516983.52186797.1- CACTGCTGCATTTCTCCATCTTCTGGAGCCTACAATCATGGTTTACCTCTGCTGAGACC  
SRR516983.60185222.2+ CACTGCTGCATTTCTCCATCTTCTGGAGCCTACAATCATGGTTTACCTCTGCTGAGACC  
SRR516983.99315750.2- CACTGCTGCATTTCTCCATCTTCTGGAGCCTACAATCATGGTTTACCTCTGCTGAGACC  
SRR516984.19458384.2- CACTGCTGCATTTCTCCATCTTCTGGAGCCTACAATCATGGTTTACCTCTGCTGAGACC  
SRR516984.39380541.1- CACTGCTGCATTTCTCCATCTTCTGGAGCCTACAATCATGGTTTACCTCTGCTGAGACC  
SRR516984.46881394.2+ CACTGCTGCATTTCTCCATCTTCTGGAGCCTACAATCATGGTTTACCTCTGCTGAGACC  
SRR516984.85335095.2- CACTGCTGCATTTCTCCATCTTCTGGAGCCTACAATCATGGTTTACCTCTGCTGAGACC  
SRR516985.18771290.2- CACTGCTGCATTTCTCCATCTTCTGGAGCCTACAATCATGGTTTACCTCTGCTGAGACC  
SRR516985.21667072.2- CACTGCTGCATTTCTCCATCTTCTGGAGCCTACAATCATGGTTTACCTCTGCTGAGACC  
SRR516985.24934961.2- CACTGCTGCATTTCTCCATCTTCTGGAGCCTACAATCATGGTTTACCTCTGCTGAGACC  
SRR516985.3722256.2- CACTGCTGCATTTCTCCATCTTCTGGAGCCTACAATCATGGTTTACCTCTGCTGAGACC  
SRR516985.49910327.1- CACTGCTGCATTTCTCCATCTTCTGGAGCCTACAATCATGGTTTACCTCTGCTGAGACC  
SRR516985.58622247.1+ CACTGCTGCATTTCTCCATCTTCTGGAGCCTACAATCATGGTTTACCTCTGCTGAGACC  
SRR516985.65479664.1- CACTGCTGCATTTCTCCATCTTCTGGAGCCTACAATCATGGTTTACCTCTGCTGAGACC  
SRR516985.88521940.2- CACTGCTGCATTTCTCCATCTTCTGGAGCCTACAATCATGGTTTACCTCTGCTGAGACC  
SRR516985.94632745.2+ CACTGCTGCATTTCTCCATCTTCTGGAGCCTACAATCATGGTTTACCTCTGCTGAGACC  
SRR516986.15810916.2- CACTGCTGCATTTCTCCATCTTCTGGAGCCTACAATCATGGTTTACCTCTGCTGAGACC  
SRR516986.21282883.1- CACTGCTGCATTTCTCCATCTTCTGGAGCCTACAATCATGGTTTACCTCTGCTGAGACC  
SRR516986.6287834.2+ CACTGCTGCATTTCTCCATCTTCTGGAGCCTACAATCATGGTTTACCTCTGCTGAGACC  
SRR516987.14379181.1- CACTGCTGCATTTCTCCATCTTCTGGAGCCTACAATCATGGTTTACCTCTGCTGAGACC  
SRR516987.73050149.1- CACTGCTGCATTTCTCCATCTTCTGGAGCCTACAATCATGGTTTACCTCTGCTGAGACC  
SRR516988.28221388.1- CACTGCTGCATTTCTCCATCTTCTGGAGCCTACAATCATGGTTTACCTCTGCTGAGACC  
SRR516988.48142203.1- CACTGCTGCATTTCTCCATCTTCTGGAGCCTACAATCATGGTTTACCTCTGCTGAGACC  
SRR516988.8503657.1+ CACTGCTGCATTTCTCCATCTTCTGGAGCCTACAATCATGGTTTACCTCTGCTGAGACC  
SRR516989.31478451.2- CACTGCTGCATTTCTCCATCTTCTGGAGCCTACAATCATGGTTTACCTCTGCTGAGACC  
SRR516989.46948006.2+ CACTGCTGCATTTCTCCATCTTCTGGAGCCTACAATCATGGTTTACCTCTGCTGAGACC  
SRR516989.48094546.1+ CACTGCTGCATTTCTCCATCTTCTGGAGCCTACAATCATGGTTTACCTCTGCTGAGACC  
SRR516989.78285929.2+ CACTGCTGCATTTCTCCATCTTCTGGAGCCTACAATCATGGTTTACCTCTGCTGAGACC  
SRR516990.18276182.1- CACTGCTGCATTTCTCCATCTTCTGGAGCCTACAATCATGGTTTACCTCTGCTGAGACC  
SRR516990.25197712.2+ CACTGCTGCATTTCTCCATCTTCTGGAGCCTACAATCATGGTTTACCTCTGCTGAGACC  
SRR516990.26352168.1- CACTGCTGCATTTCTCCATCTTCTGGAGCCTACAATCATGGTTTACCTCTGCTGAGACC  
SRR516990.28337778.2+ CACTGCTGCATTTCTCCATCTTCTGGAGCCTACAATCATGGTTTACCTCTGCTGAGACC  
SRR516990.52881947.2- CACTGCTGCATTTCTCCATCTTCTGGAGCCTACAATCATGGTTTACCTCTGCTGAGACC  
SRR516991.25212876.1- CACTGCTGCATTTCTCCATCTTCTGGAGCCTACAATCATGGTTTACCTCTGCTGAGACC  
SRR516991.38701220.2+ CACTGCTGCATTTCTCCATCTTCTGGAGCCTACAATCATGGTTTACCTCTGCTGAGACC  
SRR516991.40101822.2+ CACTGCTGCATTTCTCCATCTTCTGGAGCCTACAATCATGGTTTACCTCTGCTGAGACC  
SRR516991.55763720.1+ CACTGCTGCATTTCTCCATCTTCTGGAGCCTACAATCATGGTTTACCTCTGCTGAGACC  
SRR516991.83096318.2+ CACTGCTGCATTTCTCCATCTTCTGGAGCCTACAATCATGGTTTACCTCTGCTGAGACC  
SRR516991.8406901.1- CACTGCTGCATTTCTCCATCTTCTGGAGCCTACAATCATGGTTTACCTCTGCTGAGACC

SRR516991.88390963.2- CACTGCTGCGTTTCTCCATCTTCTGGAGCCTACAATCATGTTTACCTCTGCTGAGACC  
SRR516992.10463572.2+ CACTGCTGCGTTTCTCCATCTTCTGGAGCCTACAATCATGTTTACCTCTGCTGAGACC  
SRR516992.30084668.1+ CACTGCTGCGTTTCTCCATCTTCTGGAGCCTACAATCATGTTTACCTCTGCTGAGACC  
SRR516992.45298055.2+ CACTGCTGCATTTCTCCATCTTCTGGAGCCTACAATCATGTTTACCTCAGCTGAGACC  
SRR516993.14999698.2+ CACTGCTGCGTTTCTCCATCTTCTGGAGCCTACAATCATGTTTACCTCTGCTGAGACC  
SRR516993.6142128.1- CACTGCTGCGTTTCTCCATCTTCTGGAGCCTACAATCATGTTTACCTCTGCTGAGACC  
SRR516993.79889276.2- CACTGCTGCGTTTCTCCATCTTCTGGAGCCTACAATCATGTTTACCTCTGCTGAGACC  
SRR516994.3915521.1- CACTGCTGCGTTTCTCCATCTTCTGGAGCCTACAATCATGTTTACCTCTGCTGAGACC  
SRR516994.39508980.2- CACTGCTGCGTTTCTCCATCTTCTGGAGCCTACAATCATGTTTACCTCTGCTGAGACC  
SRR516994.50421693.1- CACTGCTGCGTTTCTCCATCTTCTGGAGCCTACAATCATGTTTACCTCTGCTGAGACC  
SRR516994.60807912.2+ CACTGCTGCGTTTCTCCATCTTCTGGAGCCTACAATCATGTTTACCTCTGCTGAGACC  
SRR516994.69104660.2- CACTGCTGCGTTTCTCCATCTTCTGGAGCCTACAATCATGTTTACCTCTGCTGAGACC  
SRR516994.71971275.2- CACTGCTGCGTTTCTCCATCTTCTGGAGCCTACAATCATGTTTACCTCTGCTGAGACC  
SRR516995.17155730.1- CACTGCTGCGTTTCTCCATCTTCTGGAGCCTACAATCATGTTTACCTCTGCTGAGACC  
SRR516995.44976834.2+ CACTGCTGCGTTTCTCCATCTTCTGGAGCCTACAATCATGTTTACCTCTGCTGAGACC  
SRR516995.7000561.2+ CACTGCTGCGTTTCTCCATCTTCTGGAGCCTACAATCATGTTTACCTCTGCTGAGACC  
SRR516996.21145455.1- CACTGCTGCATTTCTCCATCTTCTGGAGCCTACAATCATGTTTACCTCTGCTGAGACC  
SRR516996.22277693.1- CACTGCTGCATTTCTCCATCTTCTGGAGCCTACAATCATGTTTACCTCTGCTGAGACC  
SRR516996.41370267.1- CACTGCTGCATTTCTCCATCTTCTGGAGCCTACAATCATGTTTACCTCTGCTGAGACC  
SRR516996.4359948.2+ CACTGCTGCATTTCTCCATCTTCTGGAGCCTACAATCATGTTTACCTCTGCTGAGACC  
SRR516996.47831185.1+ CACTGCTGCATTTCTCCATCTTCTGGAGCCTACAATCATGTTTACCTCTGCTGAGACC  
SRR516997.1368394.1+ CACTGCTGCATTTCTCCATCTTCTGGAGCCTACAATCATGTTTACCTCTGCTGAGACC  
SRR516997.46341269.2+ CACTGCTGCGTTTCTCCATCTTCTGGAGCCTACAATCATGTTTACCTCTGCTGAGACC  
SRR516997.92691745.1+ CACTGCTGCGTTTCTCCATCTTCTGGAGCCTACAATCATGTTTACCTCTGCTGAGACC  
SRR516998.103714982.2- CACTGCTGCGTTTCTCCATCTTCTGGAGCCTACAATCATGTTTACCTCTGCTGAGACC  
SRR516998.30978040.1- CACTGCTGCATTTCTCCATCTTCTGGAGCCTACAATCATGTTTACCTCTGCTGAGACC  
SRR516998.7520652.2+ CACTGCTGCATTTCTCCATCTTCTGGAGCCTACAATCATGTTTACCTCTGCTGAGACC  
SRR516998.96704581.1+ CACTGCTGCATTTCTCCATCTTCTGGAGCCTACAATCATGTTTACCTCTGCTGAGACC  
SRR516999.101662647.1- CACTGCTGCATTTCTCCATCTTCTGGAGCCTACAATCATGTTTACCTCTGCTGAGACC  
SRR516999.35189572.2+ CACTGCTGCATTTCTCCATCTTCTGGAGCCTACAATCATGTTTACCTCTGCTGAGACC  
SRR516999.43689059.1- CACTGCTGCATTTCTCCATCTTCTGGAGCCTACAATCATGTTTACCTCTGCTGAGACC  
SRR516999.536846.1- CACTGCTGCATTTCTCCATCTTCTGGAGCCTACAATCATGTTTACCTCTGCTGAGACC  
SRR516999.79336674.2- CACTGCTGCATTTCTCCATCTTCTGGAGCCTACAATCATGTTTACCTCTGCTGAGACC  
SRR516999.8565899.2+ CACTGCTGCATTTCTCCATCTTCTGGAGCCTACAATCATGTTTACCTCTGCTGAGACC  
SRR517000.22124310.1+ CACTGCTGCGTTTCTCCATCTTCTGGAGCCTACAATCATGTTTACCTCTGCTGAGACC  
SRR517000.59205461.2- CACTGCTGCATTTCTCCATCTTCTGGAGCCTACAATCATGTTTACCTCTGCTGAGACC  
SRR517000.64893284.2- CACTGCTGCGTTTCTCCATCTTCTGGAGCCTACAATCATGTTTACCTCTGCTGAGACC  
SRR517000.79804010.1- CACTGCTGCGTTTCTCCATCTTCTGGAGCCTACAATCATGTTTACCTCTGCTGAGACC  
SRR517000.84699913.1+ CACTGCTGCATTTCTCCATCTTCTGGAGCCTACAATCATGTTTACCTCTGCTGAGACC  
SRR517000.91798223.1+ CACTGCTGCATTTCTCCATCTTCTGGAGCCTACAATCATGTTTACCTCTGCTGAGACC  
SRR517001.20598275.2- CACTGCTGCGTTTCTCCATCTTCTGGAGCCTACAATCATGTTTACCTCTGCTGAGACC  
SRR517001.21007961.1- CACTGCTGCGTTTCTCCATCTTCTGGAGCCTACAATCATGTTTACCTCTGCTGAGACC  
SRR517001.24229462.2- CACTGCTGCGTTTCTCCATCTTCTGGAGCCTACAATCATGTTTACCTCTGCTGAGACC  
SRR517001.32526871.1+ CACTGCTGCGTTTCTCCATCTTCTGGAGCCTACAATCATGTTTACCTCTGCTGAGACC  
SRR517001.54839630.2+ CACTGCTGCGTTTCTCCATCTTCTGGAGCCTACAATCATGTTTACCTCTGCTGAGACC  
SRR517001.65137644.1- CACTGCTGCGTTTCTCCATCTTCTGGAGCCTACAATCATGTTTACCTCTGCTGAGACC  
SRR517001.70785490.2- CACTGCTGCGTTTCTCCATCTTCTGGAGCCTACAATCATGTTTACCTCTGCTGAGACC  
SRR517001.99395117.2- CACTGCTGCGTTTCTCCATCTTCTGGAGCCTACAATCATGTTTACCTCTGCTGAGACC  
SRR517002.35600907.2- CACTGCTGCATTTCTCCATCTTCTGGAGCCTACAATCATGTTTACCTCTGCTGAGACC  
SRR517002.43430166.1- CACTGCTGCATTTCTCCATCTTCTGGAGCCTACAATCATGTTTACCTCTGCTGAGACC  
SRR517003.32276918.1+ CACTGCTGCATTTCTCCATCTTCTGGAGCCTACAATCATGTTTACCTCTGCTGAGACC  
SRR517004.11493321.2- CACTGCTGCGTTTCTCCATCTTCTGGAGCCTACAATCATGTTTACCTCTGCTGAGACC  
SRR517004.15232910.1+ CACTGCTGCGTTTCTCCATCTTCTGGAGCCTACAATCATGTTTACCTCTGCTGAGACC  
SRR517004.15247676.2- CACTGCTGCGTTTCTCCATCTTCTGGAGCCTACAATCATGTTTACCTCTGCTGAGACC  
SRR517004.18294620.1+ CACTGCTGCGTTTCTCCATCTTCTGGAGCCTACAATCATGTTTACCTCTGCTGAGACC  
SRR517004.38117563.1- CACTGCTGCGTTTCTCCATCTTCTGGAGCCTACAATCATGTTTACCTCTGCTGAGACC  
SRR517004.39340770.2- CACTGCTGCGTTTCTCCATCTTCTGGAGCCTACAATCATGTTTACCTCTGCTGAGACC  
SRR517004.57378084.1+ CACTGCTGCGTTTCTCCATCTTCTGGAGCCTACAATCATGTTTACCTCTGCTGAGACC  
SRR517005.29004911.1- CACTGCTGCATTTCTCCATCTTCTGGAGCCTACAATCATGTTTACCTCTGCTGAGACC  
SRR517005.36327145.1+ CACTGCTGCATTTCTCCATCTTCTGGAGCCTACAATCATGTTTACCTCTGCTGAGACC  
SRR517005.3636097.2- CACTGCTGCATTTCTCCATCTTCTGGAGCCTACAATCATGTTTACCTCTGCTGAGACC  
SRR517005.38635366.1- CACTGCTGCATTTCTCCATCTTCTGGAGCCTACAATCATGTTTACCTCTGCTGAGACC  
SRR517005.71623618.2- CACTGTTGCGTTTCTCCATCTTCTGGAGCCTACAATCATGTTTACCTCTGCTGAGACC  
SRR517005.92632228.1+ CACTGCTGCATTTCTCCATCTTCTGGAGCCTACAATCATGTTTACCTCTGCTGAGACC  
SRR517006.3014885.2+ CACTGCTGCATTTCTCCATCTTCTGGAGCCTACAATCATGTTTACCTCTGCTGAGACC  
SRR517006.42774934.1- CACTGCTGCATTTCTCCATCTTCTGGAGCCTACAATCATGTTTACCTCTGCTGAGACC  
SRR517006.60516129.2- CACTGCTGCATTTCTCCATCTTCTGGAGCCTACAATCATGTTTACCTCTGCTGAGACC  
SRR517006.63434435.1- CACTGCTGCATTTCTCCATCTTCTGGAGCCTACAATCATGTTTACCTCTGCTGAGACC  
SRR517006.7636423.2- CACTGCTGCATTTCTCCATCTTCTGGAGCCTACAATCATGTTTACCTCTGCTGAGACC  
SRR517006.92771968.1+ CACTGCTGCATTTCTCCATCTTCTGGAGCCTACAATCATGTTTACCTCTGCTGAGACC  
SRR517007.27000447.1- CACTGCTGCATTTCTCCATCTTCTGGAGCCTACAATCATGTTTACCTCTGCTGAGACC  
SRR517007.46550915.1+ CACTGCTGCATTTCTCCATCTTCTGGAGCCTACAATCATGTTTACCTCTGCTGAGACC  
SRR517007.4964232.2+ CACTGCTGCATTTCTCCATCTTCTGGAGCCTACAATCATGTTTACCTCTGCTGAGACC  
SRR517007.75509732.1+ CACTGCTGCATTTCTCCATCTTCTGGAGCCTACAATCATGTTTACCTCTGCTGAGACC  
SRR517008.17734492.1+ CACTGCTGCGTTTCTCCATCTTCTGGAGCCTACAATCATGTTTACCTCTGCTGAGACC  
SRR517008.30759488.1+ CACTGCTGCGTTTCTCCATCTTCTGGAGCCTACAATCATGTTTACCTCTGCTGAGACC  
SRR517008.31103292.1- CACTGCTGCGTTTCTCCATCTTCTGGAGCCTACAATCATGTTTACCTCTGCTGAGACC  
SRR517008.46362816.2- CACTGCTGCGTTTCTCCATCTTCTGGAGCCTACAATCATGTTTACCTCTGCTGAGACC  
SRR517008.47368909.1+ CACTGCTGCGTTTCTCCATCTTCTGGAGCCTACAATCATGTTTACCTCTGCTGAGACC  
SRR517008.53562741.2+ CACTGCTGCGTTTCTCCATCTTCTGGAGCCTACAATCATGTTTACCTCTGCTGAGACC  
SRR517008.72452430.1- CACTGCTGCGTTTCTCCATCTTCTGGAGCCTACAATCATGTTTACCTCTGCTGAGACC  
SRR517009.22763744.1+ CACTGCTGCGTTTCTCCATCTTCTGGAGCCTACAATCATGTTTACCTCTGCTGAGACC  
SRR517009.32725362.1- CACTGCTGCGTTTCTCCATCTTCTGGAGCCTACAATCATGTTTACCTCTGCTGAGACC  
SRR517009.37989736.1+ CACTGCTGCGTTTCTCCATCTTCTGGAGCCTACAATCATGTTTACCTCTGCTGAGACC

SRR517009.39648041.1+ CACTGCTGCGTTTCTCCATCTTCTGGAGCCTACAATCATGGTTTACCTCTGCTGAGACC  
SRR517009.41211152.1- CACTGCTGCGTTTCTCCATCTTCTGGAGCCTACAATCATGGTTTACCTCTGCTGAGACC  
SRR517009.58624417.1- CACTGCTGCGTTTCTCCATCTTCTGGAGCCTACAATCATGGTTTACCTCTGCTGAGACC  
SRR511913.20105001.2+ ACTGCTGCATTTCTCCATCTTCTGGAGCCTACAATCATGGTTTACCTCTGCTGAGACC  
SRR511913.20105241.2+ ACTGCTGCATTTCTCCATCTTCTGGAGCCTACAATCATGGTTTACCTCTGCTGAGACC  
SRR516983.45197941.1+ ACTGCTGCATTTCTCCATCTTCTGGAGCCTACAATCATGGTTTACCTCTGCTGAGACC  
SRR516989.45104008.1- ACTGCTGCATTTCTCCATCTTCTGGAGCCTACAATCATGGTTTACCTCTGCTGAGACC  
SRR516992.26374669.1+ ACTGCTGCATTTCTCCATCTTCTGGAGCCTACAATCATGGTTTACCTCTGCTGAGACC  
SRR516996.46495058.2- ACTGCTGCATTTCTCCATCTTCTGGAGCCTACAATCATGGTTTACCTCTGCTGAGACC  
SRR516999.29788274.1+ ACTGCTGCATTTCTCCATCTTCTGGAGCCTACAATCATGGTTTACCTCTGCTGAGACC  
SRR517001.18025361.1+ ACTGCTGCATTTCTCCATCTTCTGGAGCCTACAATCATGGTTTACCTCTGCTGAGACC  
SRR517002.51898282.2- ACTGCTGCATTTCTCCATCTTCTGGAGCCTACAATCATGGTTTACCTCTGCTGAGACC  
SRR517009.39987367.2- ACTGCTGCATTTCTCCATCTTCTGGAGCCTACAATCATGGTTTACCTCTGCTGAGACC  
SRR511892.53446249.2+ CTGCTGCATTTCTCCATCTTCTGGAGCCTACAATCATGGTTTACCTCTGCTGAGACC  
SRR516967.125704511.1- CTGCTGCATTTCTCCATCTTCTGGAGCCTACAATCATGGTTTACCTCTGCTGAGACC  
SRR516977.56066574.1+ CTGCTGCATTTCTCCATCTTCTGGAGCCTACAATCATGGTTTACCTCTGCTGAGACC  
SRR516982.24144878.1- CTGCTGCATTTCTCCATCTTCTGGAGCCTACAATCATGGTTTACCTCTGCTGAGACC  
SRR516995.48904445.1- CTGCTGCATTTCTCCATCTTCTGGAGCCTACAATCATGGTTTACCTCTGCTGAGACC  
SRR516998.74061869.1- CTGCTGCATTTCTCCATCTTCTGGAGCCTACAATCATGGTTTACCTCTGCTGAGACC  
SRR516967.6221170.1- TGCTGCATTTCTCCATCTTCTGGAGCCTACAATCATGGTTTACCTCTGCTGAGACC  
SRR516974.46978934.2+ TGCTGCATTTCTCCATCTTCTGGAGCCTACAATCATGGTTTACCTCTGCTGAGACC  
SRR516975.49935850.2+ TGCTGCATTTCTCCATCTTCTGGAGCCTACAATCATGGTTTACCTCTGCTGAGACC  
SRR516979.61681085.2+ TGCTGCATTTCTCCATCTTCTGGAGCCTACAATCATGGTTTACCTCTGCTGAGACC  
SRR516983.89585195.2+ TGCTGCATTTCTCCATCTTCTGGAGCCTACAATCATGGTTTACCTCTGCTGAGACC  
SRR516991.41770914.1- TGCTGCATTTCTCCATCTTCTGGAGCCTACAATCATGGTTTACCTCTGCTGAGACC  
SRR511913.25527344.1+ GCTGCATTTCTCCATCTTCTGGAGCCTACAATCATGGTTTACCTCTGCTGAGACC  
SRR516968.39655396.2+ GCTGCATTTCTCCATCTTCTGGAGCCTACAATCATGGTTTACCTCTGCTGAGACC  
SRR516998.54361396.1+ GCTGCATTTCTCCATCTTCTGGAGCCTACAATCATGGTTTACCTCTGCTGAGACC  
SRR516999.99949277.1- GCTGCATTTCTCCATCTTCTGGAGCCTACAATCATGGTTTACCTCTGCTGAGACC  
SRR517009.6644834.2- GCTGCATTTCTCCATCTTCTGGAGCCTACAATCATGGTTTACCTCTGCTGAGACC  
SRR516976.6204118.1+ CTGCGTTTCTCCATCTTCTGGAGCCTACAATCATGGTTTACCTCTGCTGAGACC  
SRR516980.42600802.2- CTGCGTTTCTCCATCTTCTGGAGCCTACAATCATGGTTTACCTCTGCTGAGACC  
SRR516990.6461511.1+ CTGCGTTTCTCCATCTTCTGGAGCCTACAATCATGGTTTACCTCTGCTGAGACC  
SRR516991.19768136.1+ CTGCGTTTCTCCATCTTCTGGAGCCTACAATCATGGTTTACCTCTGCTGAGACC  
SRR516994.26780695.2+ CTGCGTTTCTCCATCTTCTGGAGCCTACAATCATGGTTTACCTCTGCTGAGACC  
SRR516994.30789737.1+ CTGCGTTTCTCCATCTTCTGGAGCCTACAATCATGGTTTACCTCTGCTGAGACC  
SRR511916.56328020.2+ TGCATTTCTCCATCTTCTGGAGCCTACAATCATGGTTTACCTCTG  
SRR516974.54299546.1+ TGCATTTCTCCATCTTCTGGAGCCTACAATCATGGTTTACCTCTGCTGAGACC  
SRR516977.65083064.2+ TGCATTTCTCCATCTTCTGGAGCCTACAATCATGGTTTACCTCTGCTGAGACC  
SRR516982.31054443.1- TGCGTTTCTCCATCTTCTGGAGCCTACAATCATGGTTTACCTCTGCTGAGACC  
SRR516983.15530144.1+ TGCGTTTCTCCATCTTCTGGAGCCTACAATCATGGTTTACCTCTGCTGAGACC  
SRR516985.1978329.2- TGCGTTTCTCCATCTTCTGGAGCCTACAATCATGGTTTACCTCTGCTGAGACC  
SRR516996.18713822.1- TGCGTTTCTCCATCTTCTGGAGCCTACAATCATGGTTTACCTCTGCTGAGACC  
SRR516997.5355646.1- TGCGTTTCTCCATCTTCTGGAGCCTACAATCATGGTTTACCTCTGCTGAGACC  
SRR516999.108304884.1+ TGCGTTTCTCCATCTTCTGGAGCCTACAATCATGGTTTACCTCTGCTGAGACC  
SRR517001.3087830.1+ TGCGTTTCTCCATCTTCTGGAGCCTACAATCATGGTTTACCTCTGCTGAGACC  
SRR517004.41718493.2+ GCATTTCTCCATCTTCTGGAGCCTACAATCATGGTTTACCTCTGCTGAGACC  
SRR516973.25012163.1- GCATTTCTCCATCTTCTGGAGCCTACAATCATGGTTTACCTCTGCTGAGACC  
SRR516978.43288050.1- GCGTTTCTCCATCTTCTGGAGCCTACAATCATGGTTTACCTCTGCTGAGACC  
SRR516980.5795258.2- GCGTTTCTCCATCTTCTGGAGCCTACAATCATGGTTTACCTCTGCTGAGACC  
SRR516992.11057517.2- GCATTTCTCCATCTTCTGGAGCCTACAATCATGGTTTACCTCTGCTGAGACC  
SRR511915.47098295.1+ CATTCTCCATCTTCTGGAGCCTACAATCATGGTTTACCTCTGCTGAGACC  
SRR516968.145184287.2- CATTCTCCATCTTCTGGAGCCTACAATCATGGTTTACCTCTGCTGAGACC  
SRR516968.15347757.2- CGTTTCTCCATCTTCTGGAGCCTACAATCATGGTTTACCTCTGCTGAGACC  
SRR516973.63984660.2+ CGTTTCTCCATCTTCTGGAGCCTACAATCATGGTTTACCTCTGCTGAGACC  
SRR516978.9966331.1- CGTTTCTCCATCTTCTGGAGCCTACAATCATGGTTTACCTCTGCTGAGACC  
SRR516985.58077220.2+ CGTTTCTCCATCTTCTGGAGCCTACAATCATGGTTTACCTCTGCTGAGACC  
SRR516996.71975786.2- CATTCTCCATCTTCTGGAGCCTACAATCATGGTTTACCTCTGCTGAGACC  
SRR517001.103617359.1+ CGTTTCTCCATCTTCTGGAGCCTACAATCATGGTTTACCTCTGCTGAGACC  
SRR517001.22577401.1- CGTTTCTCCATCTTCTGGAGCCTACAATCATGGTTTACCTCTGCTGAGACC  
SRR511912.34406775.1- ATTTCTCCATCTTCTGGAGCCTACAATCATGGTTTACCTCTGCTGAGACC  
SRR516976.12584702.2+ GTTTCTCCATCTTCTGGAGCCTACAATCATGGTTTACCTCTGCTGAGACC  
SRR516987.5180076.1- GTTTCTCCATCTTCTGGAGCCTACAATCATGGTTTACCTCTGCTGAGACC  
SRR516990.58587583.1- ATTTCTCCATCTTCTGGAGCCTACAATCATGGTTTACCTCTGCTGAGACC  
SRR516991.44385216.1+ GTTTCTCCATCTTCTGGAGCCTACAATCATGGTTTACCTCTGCTGAGACC  
SRR516995.80032724.1- GTTTCTCCATCTTCTGGAGCCTACAATCATGGTTTACCTCTGCTGAGACC  
SRR511892.28064592.2- TTTCTCCATCTTCTGGAGCCTACAATCATGGTTTACCTCTGCTGAGACC  
SRR516969.26985112.1+ TTTCTCCATCTTCTGGAGCCTACAATCATGGTTTACCTCTGCTGAGACC  
SRR516970.19833631.2- TTTCTCCATCTTCTGGAGCCTACAATCATGGTTTACCTCTGCTGAGACC  
SRR516987.6864091.2- TTTCTCCATCTTCTGGAGCCTACAATCATGGTTTACCTCTGCTGAGACC  
SRR516989.43322421.2+ TTTCTCCATCTTCTGGAGCCTACAATCATGGTTTACCTCTGCTGAGACC  
SRR516993.55737172.2- TTTCTCCATCTTCTGGAGCCTACAATCATGGTTTACCTCTGCTGAGACC  
SRR516993.83112824.1+ TTTCTCCATCTTCTGGAGCCTACAATCATGGTTTACCTCTGCTGAGACC  
SRR516994.61678342.1+ TTTCTCCATCTTCTGGAGCCTACAATCATGGTTTACCTCTGCTGAGACC  
SRR516997.96113566.1- TTTCTCCATCTTCTGGAGCCTACAATCATGGTTTACCTCTGCTGAGACC  
SRR517002.26924755.2+ TTTCTCCATCTTCTGGAGCCTACAATCATGGTTTACCTCTGCTGAGACC  
SRR517005.50448398.2+ TTTCTCCATCTTCTGGAGCCTACAATCATGGTTTACCTCTGCTGAGACC  
SRR511911.29777200.1- TTCTCCATCTTCTGGAGCCTACAATCATGGTTTACCTCTGCTGAGACC  
SRR511913.75322811.2- TTCTCCATCTTCTGGAGCCTACAATCATGGTTTACCTCTGCTGAGACC  
SRR516977.63372655.1+ TTCTCCATCTTCTGGAGCCTACAATCATGGTTTACCTCTGCTGAGACC  
SRR516981.4478016.2- TTCTCCATCTTCTGGAGCCTACAATCATGGTTTACCTCTGCTGAGACC  
SRR517001.46019341.1+ TTCTCCATCTTCTGGAGCCTACAATCATGGTTTACCTCTGCTGAGACC  
SRR517003.9557651.2+ TTCTCCATCTTCTGGAGCCTACAATCATGGTTTACCTCTGCTGAGACC  
SRR516973.57501785.2- TCTCCATCTTCTGGAGCCTACAATCATGGTTTACCTCTGCTGAGACC













|                       |                    |
|-----------------------|--------------------|
| SRR516995.44976834.2+ | ATGACGAA           |
| SRR511892.22460703.2- | ATGACGAAC          |
| SRR511892.28500594.2- | ATGACGAAC          |
| SRR516967.20886732.1+ | ATGACGAAC          |
| SRR516985.3722256.2-  | ATGACGAAC          |
| SRR516991.88390963.2- | ATGATGAAC          |
| SRR516994.3915521.1-  | ATGACGAAC          |
| SRR516994.39508980.2- | ATGACGAAC          |
| SRR517001.21007961.1- | ATGACGAAC          |
| SRR517004.15247676.2- | ATGACGAAC          |
| SRR517004.39340770.2- | ATGACGAAC          |
| SRR517005.36327145.1+ | ATGACGAAC          |
| SRR517005.3636097.2-  | ATGACGAAC          |
| SRR517005.92632228.1+ | ATGACGAAC          |
| SRR517008.46362816.2- | ATGACGAAC          |
| SRR517009.32725362.1- | ATGACGAAC          |
| SRR511892.6007403.2+  | ATGACGAACA         |
| SRR511914.68550111.1- | ATGACGAACA         |
| SRR511914.68550259.1- | ATGACGAACA         |
| SRR516972.63526588.1- | ATGACGAACA         |
| SRR516973.2205347.2-  | ATGATGAACA         |
| SRR516978.68244002.1+ | ATGACGAACA         |
| SRR516979.22734254.1+ | ATGATGAACA         |
| SRR516989.78285929.2+ | ATGACGAACA         |
| SRR516993.6142128.1-  | ATGACGAACA         |
| SRR517004.18294620.1+ | ATGACGAACA         |
| SRR517007.27000447.1- | ATGACGAACA         |
| SRR516968.81828792.2+ | ATGACGAACAG        |
| SRR516981.64156231.1- | ATGACGAACAG        |
| SRR517000.22124310.1+ | ATGACGAACAG        |
| SRR511918.12327870.2+ | ATGACGAACAGG       |
| SRR511918.22802077.2+ | ATGACGAACAGG       |
| SRR511918.6049292.2+  | ATGACGAACAGG       |
| SRR516968.37214890.1+ | ATGACGAACAGG       |
| SRR516980.56485916.1+ | ATGACGAACAGG       |
| SRR511912.3464697.2-  | ATGACGAACAGGA      |
| SRR511913.30633233.1+ | ATGACGAACAGGA      |
| SRR511913.52630668.1+ | ATGACGAACAGGA      |
| SRR511916.29120870.1+ | ATGACGAACAGGA      |
| SRR516979.70135575.2+ | ATGATGAACAGGA      |
| SRR516982.20957450.2+ | CTGATGAACAGGA      |
| SRR516987.73050149.1- | ATGACGAACAGGA      |
| SRR516994.71971275.2- | ATGACGAACAGGA      |
| SRR517009.41211152.1- | ATGACGAACAGGA      |
| SRR511914.66457590.1+ | ATGACGAACAGGAG     |
| SRR516968.75914217.2- | ATGACGAACAGGAG     |
| SRR516972.46769474.2+ | ATGACGAACAGGAG     |
| SRR516982.11686504.2- | ATGATGAACAGGAG     |
| SRR516984.39380541.1- | ATGACGAACAGGAG     |
| SRR517009.58624417.1- | ATGACGAACAGGAG     |
| SRR511911.7460180.2+  | ATGACGAACAGGAGG    |
| SRR511913.70659514.2- | ATGACGAACAGGAGG    |
| SRR511913.72818344.2- | ATGACGAACAGGAGG    |
| SRR516967.13632766.2+ | ATGACGAACAGGAGG    |
| SRR516971.818087.2-   | ATGACGAACAGGAGG    |
| SRR516976.3885854.1-  | ATGACGAACAGGAGG    |
| SRR516983.60185222.2+ | ATGACGAACAGGAGG    |
| SRR516985.21667072.2- | ATGACGAACAGGAGG    |
| SRR516999.8565899.2+  | ATGACGGACAGGAGG    |
| SRR517001.20598275.2- | ATGACGAACAGGAGG    |
| SRR517004.38117563.1- | ATGACGAACAGGAGG    |
| SRR517004.57378084.1+ | ATGACGAACAGGAGG    |
| SRR511914.2434148.2-  | ATGACGAACAGGAGGT   |
| SRR516979.54060768.1- | ATGATGAACAGGAGGT   |
| SRR516989.31478451.2- | ATGACGAACAGGAGGT   |
| SRR516990.26352168.1- | ATGACGAACAGGAGGT   |
| SRR517001.99395117.2- | ATGACGAACAGGAGGT   |
| SRR511892.64175574.1+ | ATGACGAACAGGAGGTG  |
| SRR511912.78794364.2- | ATGACGAACAGGAGGTG  |
| SRR511913.54466415.2- | ATGACGAACAGGAGGTG  |
| SRR511914.49593496.1- | ATGACGAACAGGAGGTG  |
| SRR511914.68003041.1- | ATGACGAACAGGAGGTG  |
| SRR516968.78983771.2+ | ATGACGAACAGGAGGTG  |
| SRR516985.49910327.1- | ATGACGAACAGGAGGTG  |
| SRR516990.18276182.1- | ATGACGAACAGGAGGTG  |
| SRR516995.7000561.2+  | ATGACGAACAGGAGGTG  |
| SRR516999.43689059.1- | ATGACGAACAGGAGGTG  |
| SRR517001.65137644.1- | ATGACGAACAGGAGGTG  |
| SRR511916.21038728.2+ | ATGACGAACAGGAGGTGA |
| SRR511918.21279607.2- | ATGACGAACAGGAGGTGA |
| SRR516975.14717207.2- | ATGATGAACAGGAGGTGA |
| SRR516976.15724427.2+ | ATGATGAACAGGAGGTGA |
| SRR516985.58622247.1+ | ATGACGAACAGGAGGTGA |
| SRR517001.24229462.2- | ATGACGAACAGGAGGTGA |

SRR517008.47368909.1+ ATGACGAACAGGAGGTGA  
SRR516980.641302.1- ATGACGAACAGGAGGTGAT  
SRR516985.88521940.2- ATGACGAACAGGAGGTGAT  
SRR517002.43430166.1- ATGACGAACAGGAGGTGAT  
SRR516975.41667615.2- ATGACGAACAGGAGGTGATG  
SRR516978.65142163.2+ ATGACGAACAGGAGGTGATG  
SRR516981.51713088.2- ATGACGAACAGGAGGTGATG  
SRR516985.18771290.2- ATGACGAACAGGAGGTGATG  
SRR516989.46948006.2+ ATGACGAACAGGAGGTGATG  
SRR516989.48094546.1+ ATGACGAACAGGAGGTGATG  
SRR516991.8406901.1- ATGATGAACAGGAGGTGATG  
SRR511916.58161197.1+ ATGACGAACAGGAGGTGATGA  
SRR516968.96419618.2+ ATGACGAACAGGAGGTGATGA  
SRR516978.54979818.2- ATGACGAACAGGAGGTGATGA  
SRR516982.7942053.2- ATGATGAACAGGAGGTGATGA  
SRR516987.14379181.1- ATGACGAACAGGAGGTGATGA  
SRR516988.28221388.1- ATGACGAACAGGAGGTGATGA  
SRR516988.8503657.1+ ATGACGAACAGGAGGTGATGA  
SRR517000.91798223.1+ ATGACGAACAGGAGGTGATGA  
SRR517001.32526871.1+ ATGACGAACAGGAGGTGATGA  
SRR517006.42774934.1- ATGACGAACAGGAGGTGATGA  
SRR517009.37989736.1+ ATGACGAACAGGAGGTGATGA  
SRR516984.46881394.2+ ATGACGAACAGGAGGTGATGAC  
SRR516991.38701220.2+ ATGACGAACAGGAGGTGATGAC  
SRR516991.83096318.2+ ATGATGAACAGGAGGTGATGAC  
SRR516995.17155730.1- ATGACGAACAGGAGGTGATGAC  
SRR516998.30978040.1- ATGACGAACAGGAGGTGATGAC  
SRR516999.35189572.2+ ATGACGAACAGGAGGTGATGAC  
SRR511913.74026630.2+ ATGACGAACAGGAGGTGATGACA  
SRR511917.45677079.2- ATGACGAACAGGAGGTGATGACA  
SRR511917.69281775.2- ATGACGAACAGGAGGTGATGACA  
SRR516970.28438184.2+ ATGACGAACAGGAGGTGATGACA  
SRR516990.52881947.2- ATGACGAACAGGAGGTGATGACA  
SRR517000.84699913.1+ ATGACGAACAGGAGGTGATGACA  
SRR517007.46550915.1+ ATGACGAACAGGAGGTGATGACA  
SRR517008.30759488.1+ ATGACGAACAGGAGGTGATGACA  
SRR516979.15989227.1- ATGACGAACAGGAGGTGATGACAT  
SRR516982.57333576.1- ATGATGAACAGGAGGTGATGACAT  
SRR516992.10463572.2+ ATGACGAACAGGAGGTGATGACAT  
SRR511892.63390781.1+ ATGACGAACAGGAGGTGATGACATT  
SRR516986.21282883.1- ATGACGAACAGGAGGTGATGACATT  
SRR516997.1368394.1+ ATGACGAACAGGAGGTGATGACATT  
SRR516999.79336674.2- ATGACGAACAGGAGGTGATGACATT  
SRR511912.71061316.2+ ATGACGAACAGGAGGTTATGACATT  
SRR516967.56639881.1+ ATGACGAACAGGAGGTGATGACATTT  
SRR516973.44104519.1- ATGATGAACAGGAGGTGATGACATTT  
SRR516975.59671997.1+ ATGACGAACAGGAGGTGATGACATTT  
SRR516981.71035524.1- ATGACGAACAGGAGGTGATGACATTT  
SRR516983.26943128.1- ATGACGAACAGGAGGTGATGACATTT  
SRR516998.7520652.2+ ATGACGAACAGGAGGTGATGACATTT  
SRR516999.536846.1- ATGACGAACAGGAGGTGATGACATTT  
SRR517000.79804010.1- ATGACGAACAGGAGGTGATGACATTT  
SRR517003.32276918.1+ ATGACGAACAGGAGGTGATGACATTT  
SRR517006.63434435.1- ATGACGAACAGGAGGTGATGACATTT  
SRR511916.31954449.1+ ATGACGAACAGGAGGTGATGACATTTG  
SRR516994.60807912.2+ ATGACGAACAGGAGGTGATGACATTTG  
SRR517006.92771968.1+ ATGACGAACAGGAGGTGATGACATTTG  
SRR517009.39648041.1+ ATGACGAACAGGAGGTGATGACATTTG  
SRR511912.51896762.2+ ATGACGAACAGGAGGTGATGACATTTGA  
SRR516975.29998471.1+ ATGATGAACAGGAGGTGATGACATTTGA  
SRR516975.42749277.1- ATGATGAACAGGAGGTGATGACATTTGA  
SRR516980.26511072.2- ATGACGAACAGGAGGTGATGACATTTGA  
SRR516982.62820607.2+ ATGATGAACAGGAGGTGATGACATTTGA  
SRR516985.94632745.2+ ATGACGAACAGGAGGTGATGACATTTGA  
SRR516996.41370267.1- ATGACGAACAGGAGGTGATGACATTTGA  
SRR517006.7636423.2- ATGACGAACAGGAGGTGATGACATTTGA  
SRR511892.42564732.1+ ATGACGAACAGGAGGTGATGACATTTGAG  
SRR511911.53964321.1- ATGACGAACAGGAGGTGATGACATTTGAG  
SRR511915.30420375.2- ATGACGAACAGGAGGTGATGACATTTGAG  
SRR516973.26618435.2+ ATGATGAACAGGAGGTGATGACATTTGAG  
SRR516974.46978934.2+ ATGACGAACAGGAGGTGATGACATTTGAG  
SRR516979.13778629.2+ ATGACGAACAGGAGGTGATGACATTTGAG  
SRR517000.59205461.2- ATGACGAACAGGAGGTGATGACATTTGAG  
SRR517008.53562741.2+ ATGACGAACAGGAGGTGATGACATTTGAG  
SRR511892.35285726.1- ATGACGAACAGGAGGTGATGACATTTGAGC  
SRR516968.179954570.2- ATGACGAACAGGAGGTGATGACATTTGAGC  
SRR516978.70371063.2- ATGACGAACAGGAGGTGATGACATTTGAGC  
SRR516986.6287834.2+ ATGACGAACAGGAGGTGATGACATTTGAGC  
SRR516991.55763720.1+ ATGACGAACAGGAGGTGATGACATTTGAGC  
SRR517001.70785490.2- ATGACGAACAGGAGGTGATGACATTTGAGC  
SRR517005.71623618.2- ATGACGAACAGGAGGTGATGACATTTGAGC  
SRR516983.45197941.1+ ATGACGAACAGGAGGTGATGACATTTGAGCC  
SRR516989.45104008.1- ATGACGAACAGGAGGTGATGACATTTGAGCC  
SRR516992.26374669.1+ ATGACGAACAGGAGGTGATGACATTTGAGCC

SRR516996.46495058.2- ATGACGAACAGGAGGTGATGACATTTGAGCC  
SRR516999.29788274.1+ ATGACGAACAGGAGGTGATGACATTTGAGCC  
SRR517001.18025361.1+ ATGACGAACAGGAGGTGATGACATTTGAGCC  
SRR517002.51898282.2- ATGACGAACAGGAGGTGATGACATTTGAGCC  
SRR517009.39987367.2- ATGACGAACAGGAGGTGATGACATTTGAGCC  
SRR511892.56496978.2+ ATGACGAACAGGAGGTGATGACATTTGAGCCG  
SRR511912.67114670.1+ ATGACGAACAGGAGGTGATGACATTTGAGCCG  
SRR516969.19690168.1- ATGACGAACAGGAGGTGATGACATTTGAGCCG  
SRR516977.56066574.1+ ATGACGAACAGGAGGTGATGACATTTGAGCCG  
SRR516980.42600802.2- ATGACGAACAGGAGGTGATGACATTTGAGCCG  
SRR516982.24144878.1- ATGATGAACAGGAGGTGATGACATTTGAGCCG  
SRR516995.48904445.1- ATGACGAACAGGAGGTGATGACATTTGAGCCG  
SRR516998.74061869.1- ATGACGAACAGGAGGTGATGACATTTGAGCCG  
SRR516975.49935850.2+ ATGACGAACAGGAGGTGATGACATTTGAGCCG  
SRR516979.61681085.2+ ATGACGAACAGGAGGTGATGACATTTGAGCCG  
SRR516983.89585195.2+ ATGACGAACAGGAGGTGATGACATTTGAGCCG  
SRR516991.41770914.1- ATGATGAACAGGAGGTGATGACATTTGAGCCG  
SRR516971.36450695.2+ ATGACGAACAGGAGGTGATGACATTTGAGCCG  
SRR516998.54361396.1+ ATGACGAACAGGAGGTGATGACATTTGAGCCG  
SRR516999.99949277.1- ATGACGAACAGGAGGTGATGACATTTGAGCCG  
SRR517009.6644834.2- ATGACGAACAGGAGGTGATGACATTTGAGCCG  
SRR511892.22200889.1+ ATGACGAACAGGAGGTGATGACATTTGAGCCG  
SRR511892.25732978.1- ATGACGAACAGGAGGTGATGACATTTGAGCCG  
SRR516976.6204118.1+ ATGACGAACAGGAGGTGATGACATTTGAGCCG  
SRR516990.6461511.1+ ATGACGAACAGGAGGTGATGACATTTGAGCCG  
SRR516991.19768136.1+ ATGACGAACAGGAGGTGATGACATTTGAGCCG  
SRR516994.26780695.2+ ATGACGAACAGGAGGTGATGACATTTGAGCCG  
SRR516994.30789737.1+ ATGACGAACAGGAGGTGATGACATTTGAGCCG  
SRR511913.46683201.1- ATGACGAACAGGAGGTGATGACATTTGAGCCG  
SRR516971.1149505.2+ ATGACGAACAGGAGGTGATGACATTTGAGCCG  
SRR516974.54299546.1+ ATGACGAACAGGAGGTGATGACATTTGAGCCG  
SRR516977.65083064.2+ ATGACGAACAGGAGGTGATGACATTTGAGCCG  
SRR516980.29666170.2+ ATGACGAACAGGAGGTGATGACATTTGAGCCG  
SRR516982.31054443.1- ATGATGAACAGGAGGTGATGACATTTGAGCCG  
SRR516983.15530144.1+ ATGACGAACAGGAGGTGATGACATTTGAGCCG  
SRR516985.1978329.2- ATGACGAACAGGAGGTGATGACATTTGAGCCG  
SRR516996.18713822.1- ATGACGAACAGGAGGTGATGACATTTGAGCCG  
SRR516997.5355646.1- ATGACGAACAGGAGGTGATGACATTTGAGCCG  
SRR516999.108304884.1+ ATGACGAACAGGAGGTGATGACATTTGAGCCG  
SRR517001.3087830.1+ ATGACGAACAGGAGGTGATGACATTTGAGCCG  
SRR517004.41718493.2+ ATGACGAACAGGAGGTGATGACATTTGAGCCG  
SRR511912.25061802.2+ ATGACGAACAGGAGGTGATGACATTTGAGCCG  
SRR516973.25012163.1- ATGACGAACAGGAGGTGATGACATTTGAGCCG  
SRR516978.43288050.1- ATGACGAACAGGAGGTGATGACATTTGAGCCG  
SRR516980.5795258.2- ATGACGAACAGGAGGTGATGACATTTGAGCCG  
SRR516992.11057517.2- ATGACGAACAGGAGGTGATGACATTTGAGCCG  
SRR516993.55737172.2- ATGACGAACAGGAGGTGATGACATTTGAGCCG  
SRR511911.48293933.2- ATGACGAACAGGAGGTGATGACATTTGAGCCG  
SRR511917.54829842.1- ATGACGAACAGGAGGTGATGACATTTGAGCCG  
SRR511917.69338839.1- ATGACGAACAGGAGGTGATGACATTTGAGCCG  
SRR516973.63984660.2+ ATGATGAACAGGAGGTGATGACATTTGAGCCG  
SRR516978.9966331.1+ ATGACGAACAGGAGGTGATGACATTTGAGCCG  
SRR516985.58077220.2+ ATGACGAACAGGAGGTGATGACATTTGAGCCG  
SRR516996.71975786.2- ATGACGAACAGGAGGTGATGACATTTGAGCCG  
SRR517001.103617359.1+ ATGACGAACAGGAGGTGATGACATTTGAGCCG  
SRR517001.22577401.1- ATGACGAACAGGAGGTGATGACATTTGAGCCG  
SRR516976.12584702.2+ ATGACGAACAGGAGGTGATGACATTTGAGCCG  
SRR516987.5180076.1- ATGATGAACAGGAGGTGATGACATTTGAGCCG  
SRR516990.58587583.1- ATGACGAACAGGAGGTGATGACATTTGAGCCG  
SRR516991.44385216.1+ ATGATGAACAGGAGGTGATGACATTTGAGCCG  
SRR516995.80032724.1- ATGACGAACAGGAGGTGATGACATTTGAGCCG  
SRR516981.4478016.2- ATGACGAACAGGAGGTGATGACATTTGAGCCG  
SRR516987.6864091.2- ATGATGAACAGGAGGTGATGACATTTGAGCCG  
SRR516989.43322421.2+ ATGACGAACAGGAGGTGATGACATTTGAGCCG  
SRR516993.83112824.1+ ATGACGAACAGGAGGTGATGACATTTGAGCCG  
SRR516994.61678342.1+ ATGACGAACAGGAGGTGATGACATTTGAGCCG  
SRR516997.96113566.1- ATGACGAACAGGAGGTGATGACATTTGAGCCG  
SRR517002.26924755.2+ ATGACGAACAGGAGGTGATGACATTTGAGCCG  
SRR517005.50448398.2+ ATGACGAACAGGAGGTGATGACATTTGAGCCG  
SRR517008.21405715.2- ATGACGAACAGGAGGTGATGACATTTGAGCCG  
SRR511913.20105001.2+ ATGACGAACAGGAGGTGATGACATTTGAGCCG  
SRR511913.20105241.2+ ATGACGAACAGGAGGTGATGACATTTGAGCCG  
SRR516977.63372655.1+ ATGACGAACAGGAGGTGATGACATTTGAGCCG  
SRR517001.46019341.1+ ATGACGAACAGGAGGTGATGACATTTGAGCCG  
SRR517003.9557651.2+ ATGACGAACAGGAGGTGATGACATTTGAGCCG  
SRR511892.53446249.2+ ATGACGAACAGGAGGTGATGACATTTGAGCCG  
SRR516973.57501785.2- ATGATGAACAGGAGGTGATGACATTTGAGCCG  
SRR516981.55431738.2+ ATGACGAACAGGAGGTGATGACATTTGAGCCG  
SRR516982.67688043.2+ ATGATGAACAGGAGGTGATGACATTTGAGCCG  
SRR516983.95786046.1+ ATGACGAACAGGAGGTGATGACATTTGAGCCG  
SRR516991.16236160.2+ ATGATGAACAGGAGGTGATGACATTTGAGCCG  
SRR516996.49068306.1- ATGACGAACAGGAGGTGATGACATTTGAGCCG  
SRR516998.94026502.1+ ATGACGAACAGGAGGTGATGACATTTGAGCCG  
SRR517000.23065522.1+ ATGACGAACAGGAGGTGATGACATTTGAGCCG



SRR517002.88240524.1+ ATGACGAACAGGAGGTGATGACATTTGAGCCGCAAGTACATA  
SRR516967.125704511.1- ATGACGAACAGGAGGTGATGACATTTGAGCCGCAAGTCCATAC  
SRR516983.46519373.2- ATGACGAACAGGAGGTGATGACATTTGAGCCGCAAGTCCATAC  
SRR516983.96419424.1- ATGACGAACAGGAGGTGATGACATTTGAGTCGCAAGTCCATAC  
SRR516996.25489938.2- ATGACGAACAGGAGGTGATGACATTTGAGCCGCAAGTCCATAC  
SRR517003.43535674.1+ ATGACGAACAGGAGGTGATGACATTTGAGCCGCAAGTCCATAC  
SRR517006.48499023.1+ ATGACGAACAGGAGGTGATGACATTTGAGCCGCAAGTCCATAC  
SRR511913.25527344.1+ ATGACGAACAGGAGGTGATGACATTTGAGCCGCAAGTCCATACA  
SRR516967.6221170.1- ATGACGAACAGGAGGTGATGACATTTGAGCCGCAAGTCCATACA  
SRR516975.46689364.1+ ATGACGAACAGGAGGTGATGACATTTGAGCCGCAAGTCCATACA  
SRR516998.101916190.1- ATGACGAACAGGAGGTGATGACATTTGAGCCGCAAGTCCATACA  
SRR517000.91504937.1+ ATGACGAACAGGAGGTGATGACATTTGAGCCGCAAGTCCATACA  
SRR517001.900897.1+ ATGACGAACAGGAGGTGATGACATTTGAGCCGCAAGTCCATACA  
SRR517007.25961977.2- ATGACGAACAGGAGGTGATGACATTTGAGCCGCAAGTCCATACA  
SRR517009.83112268.1+ ATGACGAACAGGAGGTGATGACATTTGAGCCGCAAGTCCATACA  
SRR516968.39655396.2+ ATGACGAACAGGAGGTGATGACATTTGAGCCGCAAGTCCATACAA  
SRR516984.44849129.2+ ATGACGAACAGGAGGTGATGACATTTGAGCCGCAAGTCCATACAA  
SRR516986.35116064.1+ ATGACGAACAGGAGGTGATGACATTTGAGCCGCAAGTCCATACAA  
SRR516995.55914942.1- ATGACGAACAGGAGGTGATGACATTTGAGTCGCAAGTCCATACAA  
SRR516997.92588309.1- ATGACGAACAGGAGGTGATGACATTTGAGCCGCAAGTCCATACAA  
SRR517000.73971487.1+ ATGACGAACAGGAGGTGATGACATTTGAGCCGCAAGTCCATACAA  
SRR511911.29777200.1- ATGACGAACAGGAGGTGATGACATTTGAGCCTCAAGTCCATACAA  
SRR516972.84821035.1- ATGACGAACAGGAGGTGATGACATTTGAGCCGCAAGTCCATACAA  
SRR516974.64263409.1- ATGACGAACAGGAGGTGATGACATTTGAGCCGCAAGTCCATACAA  
SRR516980.6938514.1+ ATGACGAACAGGAGGTGATGACATTTGAGCCGCAAGTCCATACAA  
SRR516987.45900545.1+ ATGATGAACAGGAGGTGATGACATTTGAGCCGCAAGTCCATACAA  
SRR516987.74463633.2+ ATGACGAACAGGAGGTGATGACATTTGAGCCGCAAGTCCATACAA  
SRR516999.1489221.1- ATGACGAACAGGAGGTGATGACATTTGAGCCGCAAGTCCATACAA  
SRR516999.15834111.2- ATGACGAACAGGAGGTGATGACATTTGAGCCGCAAGTCCATACAA  
SRR517008.35566824.2+ ATGACGAACAGGAGGTGATGACATTTGAGCCGCAAGTCCATACAA  
SRR516970.19833631.2- ATGACGAACAGGAGGTGATGACATTTGAGCCGCAAGTCCATACAA  
SRR516972.17444908.2- ATGACGAACAGGAGGTGATGACATTTGAGCCGCAAGTCCATACAA  
SRR516972.29398207.1- ATGACGAACAGGAGGTGATGACATTTGAGCCGCAAGTCCATACAA  
SRR516977.18216728.2+ ATGACGAACAGGAGGTGATGACATTTGAGCCGCAAGTCCATACAA  
SRR516977.77183349.2+ ATGACGAACAGGAGGTGATGACATTTGAGCCGCAAGTCCATACAA  
SRR516979.10219896.2+ ATGACGAACAGGAGGTGATGACATTTGAGCCGCAAGTCCATACAA  
SRR516985.43613602.2+ ATGACGAACAGGAGGTGATGACATTTGAGCCGCAAGTCCATACAA  
SRR516993.60327009.1- ATGACGAACAGGAGGTGATGACATTTGAGCCGCAAGTCCATACAA  
SRR516998.96836905.2- ATGCCGAACAGGAGGTGATGACATTTGAGCCGCAAGTCCATACAA  
SRR511911.14454908.1- ATGACGAACAGGAGGTGATGACATTTGAGCCGCAAGTCCATACAA  
SRR511915.47098295.1+ ATGACGAACAGGAGGTGATGACATTTGAGCCGCAAGTCCATACAA  
SRR516974.49070472.1- ATGACGAACAGGAGGTGATGACATTTGAGCCGCAAGTCCATACAA  
SRR516975.64845215.1- ATGACGAACAGGAGGTGATGACATTTGAGCCGCAAGTCCATACAA  
SRR516993.85425731.1- ATGACGAACAGGAGGTGATGACATTTGAGTCGCAAGTCCATACAA  
SRR517000.15878174.2- ATGACGAACAGGAGGTGATGACATTTGAGCCGCAAGTCCATACAA  
SRR517000.27952472.1+ ATGACGAACAGGAGGTGATGACATTTGAGCCGCAAGTCCATACAA  
SRR517000.42847360.2- ATGACGAACAGGAGGTGATGACATTTGAGCCGCAAGTCCATACAA  
SRR517000.52705672.2+ ATGACGAACAGGAGGTGATGACATTTGAGCCGCAAGTCCATACAA  
SRR517004.46455486.1- ATGACGAACAGGAGGTGATGACATTTGAGCCGCAAGTCCATACAA  
SRR511912.34406775.1- ATGACGAACAGGAGGTGATGACATTTGAGCCGCAAGTCCATACAA  
SRR516968.145184287.2- ATGACGAACAGGAGGTGATGACATTTGAGCCGCAAGTCCATACAA  
SRR516968.15347757.2- ATGACGAACAGGAGGTGATGACATTTGAGCCGCAAGTCCATACAA  
SRR516969.26985112.1+ ATGACGAACAGGAGGTGATGACATTTGAGCCGCAAGTCCATACAA  
SRR516974.13682622.1+ ATGACGAACAGGAGGTGATGACATTTGAGCCGCAAGTCCATACAA  
SRR516976.30705361.2- ATGACGAACAGGAGGTGATGACATTTGAGTCGCAAGTCCATACAA  
SRR516976.6568357.2+ ATGATGCACAGGAGGTGATGATCATTGAGCCGCAAGTCCATACAA  
SRR516977.79316740.2- ATGACGAACAGGAGGTGATGACATTTGAGCCGCAAGTCCATACAA  
SRR516979.63870114.2- ATGACGAACAGGAGGTGATGACATTTGAGCCGCAAGTCCATACAA  
SRR516990.30827191.1+ ATGACGAACAGGAGGTGATGACATTTGAGCCGCAAGTCCATACAA  
SRR516997.85778454.1+ ATGATGAACAGGAGGTGATGACATTTGAGCCGCAAGTCCATACAA  
SRR517003.47760361.1- ATGACGAACAGGAGGTGATGACATTTGAGCCGCAAGTCCATACAA  
SRR517009.80280823.1- ATGACGAACAGGAGGTGATGACATTTGAGTCGCAAGTCCATACAA  
SRR511892.28064592.2- ATGACGAACAGGAGGTGATGACATTTGAGCCGCAAGTCCATACAA  
SRR516987.59068064.1- ATGACGAACAGGAGGTGATGACATTTGAGCCGCAAGTCCATACAA  
SRR516992.47548931.2+ ATGACGAACAGGAGGTGATGACATTTGAGCCGCAAGTCCATACAA  
SRR517000.49039794.2- ATGACGAACAGGAGGTGATGACATTTGAGCCGCAAGTCCATACAA  
SRR517000.59218275.1+ ATGACGAACAGGAGGTGATGACATTTGAGCCGCAAGTCCATACAA  
SRR517000.86755698.2- ATGACGAACAGGAGGTGATGACATTTGAGCCGCAAGTCCATACAA  
SRR517005.68411118.2+ ATGACGAACAGGAGGTGATGACATTTGAGCCGCAAGTCCATACAA  
SRR511913.75322811.2- ATGACGAACAGGAGGTGATGACATTTGAGCCGCAAGTCCATACAA  
SRR516991.45959728.2- ATGATGAACAGGAGGTGATGACATTTGAGCCGCAAGTCCATACAA  
SRR516992.5218916.1- ATGACGAACAGGAGGTGATGACATTTGAGCCGCAAGTCCATACAA  
SRR516996.43104832.1- ATGACGAACAGGAGGTGATGACATTTGAGCCGCAAGTCCATACAA  
SRR516997.19843563.2+ ATGACGAACAGGAGGTGATGACATTTGAGCCGCAAGTCCATACAA  
SRR516998.77015275.2+ ATGACGAACAGGAGGTGATGACATTTGAGCCGCAAGTCCATACAA  
SRR516999.56136092.1+ ATGACGAACAGGAGGTGATGACATTTGAGCCGCAAGTCCATACAA  
SRR517001.87349540.2- ATGACGAACAGGAGGTGATGACATTTGAGCCGCAAGTCCATACAA  
SRR516979.67226952.1+ ATGACGAACAGGAGGTGATGACATTTGAGCCGCAAGTCCATACAA  
SRR516986.21942167.1+ ATGACGAACAGGAGGTGATGACATTTGAGCCGCAAGTCCATACAA  
SRR516998.58191126.1+ ATGACGAACAGGAGGTGATGACATTTGAGCCGCAAGTCCATACAA  
SRR517003.50373066.2+ ATGACGAACAGGAGGTGATGACATTTGAGCCGCAAGTCCATACAA  
SRR517003.66035176.2+ ATGACGAACAGGAGGTGATGACATTTGAGCCGCAAGTCCATACAA  
SRR517009.44679586.2- ATGACGAACAGGAGGTGATGACATTTGAGTCGCAAGTCCATACAA  
SRR511892.41096124.2- ATGACGAACAGGAGGTGATGACATTTGAGCCGCAAGTCCATACAA

SRR516970.20795711.2- ATGACGAACAGGAGGTGATGACATTTGAGCCGCAAGTCCATACAACCTGGCTGG  
SRR516985.12986836.1+ ATGACGAACAGGAGGTGATGACATTTGAGCCGCAAGTCCATACAACCTGGCTGG  
SRR516989.7050322.1- ATGACGAACAGGAGGTGATGACATTTGAGCCGCAAGTCCATACAACCTGGCTGG  
SRR516998.65330415.1- ATGACGAACAGGAGGTGATGACATTTGAGCCGCAAGTCCATACAACCTGGCTGG  
SRR517005.99973486.1- ATGACGAACAGGAGGTGATGACATTTGAGCCGCAAGTCCATACAACCTGGCTGG  
SRR511911.21547512.1+ ATGACGAACAGGAGGTGATGACATTTGAGCCGCAAGTCCATACAACCTGGCTGGG  
SRR516985.56923558.1+ ATGACGAACAGGAGGTGATGACATTTGAGCCGCAAGTCCATACAACCTGGCTGGT  
SRR516987.91428967.1- ATGATGAACAGGAGGTGATGACATTTGAGCCGCAAGTCCATACAACCTGGCTGGT  
SRR516998.39972283.1+ ATGACGAACAGGAGGGGATGACATTTGAGCCGCAAGTCCATACAACCTGGCTGGG  
SRR516998.60100976.2+ ATGACGAACAGGAGGTGATGACATTTGAGCCGCAAGTCCATACAACCTGGCTGGG  
SRR516998.76618156.1+ ATGACGAACAGGAGGTGATGACATTTGAGCCGCAAGTCCATACAACCTGGCTGGG  
SRR517001.26973912.2- ATGACGAACAGGAGGTGATGACATTTGAGCCGCAAGTCCATACAACCTGGCTGGG  
SRR517006.28491749.1+ ATGACGAACAGGAGGTGATGACATTTGAGCCGCAAGTCCATACAACCTGGCTGGG  
SRR511892.65397717.1- ATGACGAACAGGAGGTGATGACATTTGAGCCGCAAGTCCATACAACCTGGCTGGGT  
SRR516968.100131508.2+ ATGACGAACAGGAGGTGATGACATTTGAGCCGCAAGTCCATACAACCTGGCTGGG  
SRR516973.35471727.2+ ATGATGAACAGGAGGTGATGACATTTGAGCCGCAAGTCCATACAACCTGGCTGGGT  
SRR516994.74877170.1+ ATGACGAACAGGAGGTGATGACATTTGAGCCGCAAGTCCATACAACCTGGCTGGGT  
SRR516996.88052646.2+ ATGACGAACAGGAGGTGATGACATTTGAGCCGCAAGTCCATACAACCTGGCTGGGG  
SRR511912.30395815.2+ ATGACGAACAGGAGGTGATGACATTTGAGCCGCAAGTCCATACAACCTGGCTGGGTG  
SRR516967.87829969.2- ATGACGAACAGGAGGTGATGACATTTGAGCCGCAAGTCCATACAACCTGGCTGGGTG  
SRR516998.13962236.2- ATGACGAACAGGAGGTGATGACATTTGAGCCGCAAGTCCATACAACCTGGCTGGGTG  
SRR517000.29169337.1- ATGACGAACAGGAGGTGATGACATTTGAGCCGCAAGTCCATACAACCTGGCTGGGTG  
SRR517008.11106831.2+ ATGACGAACAGGAGGTGATGACATTTGAGCCGCAAGTCCATACAACCTGGCTGGGTG  
SRR517009.71578868.2- ATGACGAACAGGAGGTGATGACATTTGAGCTGCAAGTCCATACAACCTGGGTGGGTG  
SRR511892.39300111.1- ATGACGAACAGGAGTGNATGACATTTGAGCCGCAAGTCCATACAACCTGGCTGGGTGG  
SRR516989.78968928.1+ ATGACGAACAGGAGGTGATGACATTTGAGCCGCAAGTCCATACAACCTGGCTGGGGGG  
SRR516993.72207497.1- ATGACGAACAGGAGGTGATGACATTTGAGCCGCAAGTCCATACAACCTGGCTGGGTGG  
SRR517008.87918252.1+ ATGACGAACAGGAGGTGATGACATTTGAGCCGCAAGTCCATACAACCTGGCTGGGTGG  
SRR516968.109083542.1- ATGACGAACAGGAGGTGATGACATTTGAGCCGCAAGTCCATACAACCTGGCTGGGTGGC  
SRR516968.140796502.1- ATGACGAACAGGAGGTGATGACATTTGAGCCGCAAGTCCATACAACCTGGCTGGGTGGC  
SRR516973.20554683.1- ATGACGAACAGGAGGTGATGACATTTGAGCCGCAAGTCCATACAACCTGGCTGGGTGGC  
SRR516973.35471726.2+ ATGATGAACAGGAGGTGATGACATTTGAGCCGCAAGTCCATACAACCTGGCTGGGTGGC  
SRR516982.23500814.2+ ATGATGAACAGGAGGTGATGACATTTGAGCCGCAAGTCCATACAACCTGGCTGGGTGGG  
SRR516982.30415927.2- ATGATGAACAGGAGGTGATGACATTTGAGCCGCAAGTCCATACAACCTGGCTGGGTGGC  
SRR516982.42917165.2+ ATGATGAACAGGAGGTGATGCCATTTGAGCCGCAAGTCCATACAACCTGGCTGGGTGGC  
SRR516993.83529308.2+ ATGACGAACAGGAGGTGATGACATTTGAGCTGCAAGTCCATACAACCTGGCTGGGTGGG  
SRR516996.24708888.2+ ATGACGAACAGGAGGTGATGACATTTGAGCCGCAAGTCCATACAACCTGGCTGGGTGGC  
SRR517004.31599976.2- ATGACGAACAGGAGGTGATGACATTTGAGCCGCAAGTCCATACAACCTGGCTGGGTGGC  
SRR517004.39008760.1- ATGACGAACAGGAGGTGATGACATTTGAGCCGCAAGTCCATACAACCTGGCTGGGTGGC  
SRR511912.63931928.2+ ATGACGAACAGGAGGTGATGACATTTGAGCCGCAAGTCCATACAACCTGGCTGGGTGGGCA  
SRR511914.1000674.2+ ATGACGAACAGGAGGTGATGACATTTGAGCCGCAAGTCCATACAACCTGGCTGGGTGGG  
SRR516987.61859958.2- ATGATGAACAGGAGGTGATGACATTTGAGCCGCAAGTCCATACAACCTGGCTGGGTGGC  
SRR516989.36199378.2+ ATGACGAACAGGAGGTGATGACATTTGAGCCGCAAGTCCATACAACCTGGCTGGGTGGGCA  
SRR516989.52379004.2- ATGACGAACAGGAGGTGATGACATTTGAGCCGCAAGTCCATACAACCTGGCTGGGTGGC  
SRR517002.27629774.1+ ATGACGAACAGGAGGTGATGACATTTGAGCCGCAAGTCCATACAACCTGGCTGGGTGGGCA  
SRR511892.23600637.2+ ATGACGAACAGGAGGTGATGACATTTGAGCCGCAAGTCCATACAACCTGGCTGGGTGGC  
SRR511892.45271449.2+ ATGACGAACAGGAGGTGATGACATTTGAGCCGCAAGTCCATACAACCTGGCTGGGTGGC  
SRR511892.6007403.1- ATGACGAACAGGAGGTGATGACATTTGAGCCGCAAGTCCATACAACCTGGCTGGGTGGC  
SRR511892.63390781.2- ATGACGAACAGGAGGTGATGACATTTGAGCCGCAAGTCCATACAACCTGGCTGGGTGGC  
SRR511892.64175574.2- ATGACGAACAGGAGGTGATGACATTTGAGCCGCAAGTCCATACAACCTGGCTGGGTGGC  
SRR511892.9511611.2+ ATGACGAACAGGAGGTGATGACATTTGAGCCGCAAGTCCATACAACCTGGCTGGGTGGC  
SRR511911.19148709.2+ ATGACGAACAGGAGGTGATGACATTTGAGCCGCAAGTCCATACAACCTGGCTGGGTGGC  
SRR511911.21547512.2- ATGACGAACAGGAGGTGATGACATTTGAGCCGCAAGTCCATACAACCTGGCTGGGTGGC  
SRR511911.3389924.2+ ATGACGAACAGGAGGTGATGACATTTGAGCCGCAAGTCCATACAACCTGGCTGGGTGGC  
SRR511911.36873194.1- ATGACGAACAGGAGGTGATGACATTTGAGCCGCAAGTCCATACAACCTGGCTGGGTGGC  
SRR511911.38218078.2- ATGACGAACAGGAGGTGATGACATTTGAGCCGCAAGTCCATACAACCTGGCTGGGTGGC  
SRR511911.51765582.1+ ATGACGAACAGGAGGTGATGACATTTGAGCCGCAAGTCCATACAACCTGGCTGGGTGGC  
SRR511911.58123630.1+ ATGACGAACAGGAGGTGATGACATTTGAGCCGCAAGTCCATACAACCTGGCTGGGTGGC  
SRR511911.60280636.2+ ATGACGAACAGGAGGGATGACATTTGAGCCGCAAGTCCATACAACCTGGCTGGGTGGGAT  
SRR511911.7460180.1- ATGACGAACAGGAGGTGATGACATTTGAGCCGCAAGTCCATACAACCTGGCTGGGTGGC  
SRR511912.20243841.1- ATGACGAACAGGAGGTGATGACATTTGAGCCGCAAGTCCATACAACCTGGCTGGGTGGC  
SRR511912.59893234.1+ ATGACGAACAGGAGGTGATGACATTTGAGCCGCAAGTCCATACAACCTGGCTGGGTGGC  
SRR511912.63185812.1+ ATGACGAACAGGAGGTGATGACATTTGAGCCGCAAGTCCATACAACCTGGCTGGGTGGC  
SRR511912.63185956.1+ ATGACGAACAGGAGGTGATGACATTTGAGCCGCAAGTCCATACAACCTGGCTGGGTGGC  
SRR511912.70385865.1- ATGACGAACAGGAGGTGATGACATTTGAGCCGCAAGTCCATACAACCTGGCTGGGTGGC  
SRR511912.83293905.1+ ATGACGAACAGGAGGTGATGACATTTGAGCCGCAAGTCCATACAACCTGGCTGGGTGGC  
SRR511913.18165035.2- ATGACGAACAGGAGGTGATGACATTTGAGCCGCAAGTCCATACAACCTGGCTGGGTGGC  
SRR511913.22705507.2- ATGACGAACAGGAGGTGATGACATTTGAGCCGCAAGTCCATACAACCTGGCTGGGTGGC  
SRR511913.52308827.1- ATGACGAACAGGAGGTGATGACATTTGAGCCGCAAGTCCATACAACCTGGCTGGGTGGC  
SRR511913.70154375.2- ATGACGAACAGGAGGTGATGACATTTGAGCCGCAAGTCCATACAACCTGGCTGGGTGGC  
SRR511913.72838419.1+ ATGACGAACAGGAGGTGATGACATTTGAGCCGCAAGTCCATACAACCTGGCTGGGTGGC  
SRR511914.19779621.1- ATGACGAACAGGAGGTGATGACATTTGAGCCGCAAGTCCATACAACCTGGCTGGGTGGC  
SRR511914.41285120.1- ATGACGAACAGGAGGTGATGACATTTGAGCCGCAAGTCCATACAACCTGGCTGGGTGGC  
SRR511914.45719171.1+ ATGACGAACAGGAGGTGATGACATTTGAGCCGCAAGTCCATACAACCTGGCTGGGTGGC  
SRR511914.56122848.1+ ATGACGAACAGGAGGTGATGACATTTGAGCCGCAAGTCCATACAACCTGGCTGGGTGGC  
SRR511914.80423043.1- AGGACGAACAGGAGGTGATGACATTTGAGCCGCAAGTCCATACAACCTGGCTGGGTGGC  
SRR511915.12934870.2- ATGACGAACAGGAGGTGATGACATTTGAGCCGCAAGTCCATACAACCTGGCTGGGTGGC  
SRR511915.51271900.2+ ATGACGAACAGGAGGTGATGACATTTGAGCCGCAAGTCCATACAACCTGGCTGGGTGGC  
SRR511915.56868915.2- ATGACGAACAGGAGGTGATGACATTTGAGCCGCAAGTCCATACAACCTGGCTGGGTGGC  
SRR511915.717767.2+ ATGACGAACAGGAGGTGATGACATTTGAGCCGCAAGTCCATACAACCTGGCTGGGTGGC  
SRR511915.73501967.1- ATGACGAACAGGAGGTGATGACATTTGAGCCGCAAGTCCATACAACCTGGCTGGGTGGC  
SRR516967.100239201.1+ ATGACGAACAGGAGGTGATGACATTTGAGCCGCAAGTCCATACAACCTGGCTGGGTGGC  
SRR516967.115389681.2+ ATGACGAACAGGAGGTGATGACATTTGAGCCGCAAGTCCATACAACCTGGCTGGGTGGC  
SRR516967.121468181.1- ATGACGAACAGGAGGTGATGACATTTGAGCCGCAAGTCCATACAACCTGGCTGGGTGGC

SRR516967.132651451.1- ATGACGAACAGGAGGTGATGACATTTGAGCCGCAAGTCCATACAACCTGGCTGGGTGGCAT  
SRR516967.135591639.1+ ATGACGAACAGGAGGTGATGACATTTGAGCCGCAAGTCCATACAACCTGGCTGGGTGGCAT  
SRR516967.138148601.1- ATGACGAACAGGAGGTGATGACATTTGAGCCGCAAGTCCATACAACCTGGCTGGGTGGCAT  
SRR516967.148303398.2- ATGACGAACAGGAGGTGATGACATTTGAGCCGCAAGTCCATACAACCTGGCTGGGTGGCAT  
SRR516967.34973661.1+ ATGACGAACAGGAGGTGATGACATTTGAGCCGCAAGTCCATACAACCTGGCTGGGTGGCAT  
SRR516967.55179281.2+ ATGACGAACAGGAGGTGATGACATTTGAGCCGCAAGTCCATACAACCTGGCTGGGTGGCAT  
SRR516967.57741754.1+ ATGACGAACAGGAGGTGATGACATTTGAGCCGCAAGTCCATACAACCTGGCTGGGTGGCAT  
SRR516967.59477310.1- ATGACGAACAGGAGGTGATAACATTTGAGCCGCAAGTCCANACAACCTGGCTGGGTGGCAT  
SRR516967.63778390.2- ATGACGAACAGGAGGTGATGACATTTGAGCCGCAAGTCCATACAACCTGGCTGGGTGGCAT  
SRR516967.81487147.2+ ATGACGAACAGGAGNTGATGACATTTGAGCCGCAAGTCCATACAACCTGGCTGGGTGGCAT  
SRR516967.83672796.1- ATGACGAACAGGAGGTGATGACATTTGAGCCGCAAGTCCATACAACCTGGCTGGGTGGCAT  
SRR516967.94039320.1- ATGACGAACAGGAGGTGATGACATTTGAGCCGCAAGTCCATACAACCTGGCTGGGTGGCAT  
SRR516967.94416127.1- ATGACGAACAGGAGGTGATGACATTTGAGCCGCAAGTCCATACAACCTGGCTGGGTGGCAT  
SRR516967.96216344.1+ ATGACGAACAGGAGGTGATGACATTTGAGCCGCAAGTCCATACAACCTGGCTGGGTGGCAT  
SRR516968.106610860.1- ATGACGAACAGGAGGTGATGACATTTGAGCCGCAAGTCCATACAACCTGGCTGGGTGGCAT  
SRR516968.108661732.1- ATGACGAACAGGAGGTGATGACATTTGAGCCGCAAGTCCATACAACCTGGCTGGGTGGCAT  
SRR516968.137574947.2+ ATGACGAACAGGAGGTGATGACATTTGAGCCGCAAGTCCATACAACCTGGCTGGGTGGCAT  
SRR516968.156018396.1- ATGACGAACAGGAGGTGATGACATTTGAGCCGCAAGTCCATACAACCTGGCTGGGTGGCAT  
SRR516968.164894710.1+ ATGACGAACAGGAGGTGATGACATTTGAGCCGCAAGTCCATACAACCTGGCTGGGTGGCAT  
SRR516968.40141403.1- ATGACGAACAGGAGGTGATGACATTTGAGCCGCAAGTCCATACAACCTGGCTGGGTGGCAT  
SRR516968.43850003.2- ATGACGAACAGGAGGTGATGACATTTGAGCCGCAAGTCCATACAACCTGGCTGGGTGGCAT  
SRR516968.54367312.2+ ATGACGAACAGGAGGTGATGACATTTGAGCCGCAAGTCCATACAACCTGGCTGGGTGGCAT  
SRR516968.58859238.1+ ATGACGAACAGGAGGTGATGACATTTGAGCCGCAAGTCCATACAACCTGGCTGGGTGGCAT  
SRR516968.73747636.1- ATGACGAACAGGAGGTGATGACATTTGAGCCGCAAGTCCATACAACCTGGCTGGGTGGCAT  
SRR516968.75435688.1- ATGACGAACAGGAGGTGATGACATTTGAGCCGCAAGTCCATACAACCTGGCTGGGTGGCAT  
SRR516968.8958322.1+ ATGACGAACAGGAGGTGATGACATTTGAGCCGCAAGTCCATACAACCTGGCTGGGTGGCAT  
SRR516971.15050413.1- ATGACGAACAGGAGGTGATGACATTTGAGCCGCAAGTCCATACAACCTGGCTGGGTGGCAT  
SRR516972.49653018.2- ATGACGAACAGGAGGTGATGACATTTGAGCCGCAAGTCCATACAACCTGGCTGGGTGGCAT  
SRR516973.16005217.1- ATGACGAACAGGAGGTGATGACATTTGAGCCGCAAGTCCATACAACCTGGCTGGGTGGCAT  
SRR516973.16904597.1- ATGATGAACAGGAGGTGATGACATTTGAGCCGCAAGTCCATACAACCTGGCTGGGTGGCAT  
SRR516973.16906873.1- ATGATGAACAGGAGGTGATGACATTTGAGCCGCAAGTCCATACAACCTGGCTGGGTGGCAT  
SRR516973.4884301.2- ATGACGAACAGGAGGTGATGACATTTGAGCCGCAAGTCCATACAACCTGGCTGGGTGGCAT  
SRR516973.61866208.2+ ATGACGAACAGGAGGTGATGACATTTGAGCCGCAAGTCCATACAACCTGGCTGGGTGGCAT  
SRR516974.21816576.2- ATGACGAACAGGAGGTGATGACATTTGAGCCGCAAGTCCATACAACCTGGCTGGGTGGCAT  
SRR516974.29282850.1+ ATGACGAACAGGAGGTGATGACATTTGAGCCGCAAGTCCATACAACCTGGCTGGGTGGCAT  
SRR516974.66440091.2- ATGACGAACAGGAGGTGATGACATTTGAGCCGCAAGTCCATACAACCTGGCTGGGTGGCAT  
SRR516975.15347664.1- ATGATGAACAGGAGGTGATGACATTTGAGCCGCAAGTCCATACAACCTGGCTGGGTGGCAT  
SRR516975.22417896.2+ ATGATGAACAGGAGGTGATGACATTTGAGCCGCAAGTCCATACAACCTGGCTGGGTGGCAT  
SRR516975.39714728.2+ ATGATGAACAGGAGGTGATGACATTTGAGCCGCAAGTCCATACAACCTGGCTGGGTGGCAT  
SRR516975.59637801.2- ATGACGAACAGGAGGTGATGACATTTGAGCCGCAAGTCCATACAACCTGGCTGGGTGGCAT  
SRR516976.10068918.1- ATGACGAACAGGAGGTGATGACATTTGAGCTGCAAGTCCATACAACCTGGCTGGGTGGCAT  
SRR516976.2015671.2+ ATGATGAACAGGAGGTGATGACATTTGAGCCGCAAGTCCATACAACCTGGCTGGGTGGCAT  
SRR516976.29296347.1- ATGACGAACAGGAGGTGATGACATTTGAGCTGCAAGTCCATACAACCTGGCTGGGTGGCAT  
SRR516976.36876145.1+ ATGACGAACAGGAGGTGATGACATTTGAGCTGCAAGTCCATACAACCTGGCTGGGTGGCAT  
SRR516976.50893891.2- ATGACGAACAGTAGGTGATGACATTTGAGCTGCAAGTCCATACAACCTGGCTGGGTGGCAT  
SRR516976.57348554.2- ATGATGAACAGGAGGTGATGACATTTGAGCCGCAAGTCCATACAACCTGGCTGGGTGGCAT  
SRR516976.8946365.1- ATGATGAACAGGAGGTGATGACATTTGAGCCGCAAGTCCATACAACCTGGCTGGGTGGCAT  
SRR516977.10878176.2- ATGACGAACAGGAGGTGATGACATTTGAGCCGCAAGTCCATACAACCTGGCTGGGTGGCAT  
SRR516977.12820030.2+ ATGACGAACAGGAGGTGATGACATTTGAGCCGCAAGTCCATACAACCTGGCTGGGTGGCAT  
SRR516977.13189923.1+ ATGACGAACAGGAGGTGATGACATTTGAGCCGCAAGTCCATACAACCTGGCTGGGTGGCAT  
SRR516977.49992915.2- ATGACGAACAGGAGGTGATGACATTTGAGCCGCAAGTCCATACAACCTGGCTGGGTGGCAT  
SRR516977.57408704.1+ ATGACGAACAGGAGGTGATGACATTTGAGCCGCAAGTCCATACAACCTGGCTGGGTGGCAT  
SRR516977.75947199.2+ ATGACGAACAGGAGGTGATGACATTTGAGCCGCAAGTCCATACAACCTGGCTGGGTGGCAT  
SRR516978.1992911.1+ ATGACGAACAGGAGGTGATGACATTTGAGCCGCAAGTCCATACAACCTGGCTGGGTGGCAT  
SRR516978.37638949.1- ATGACGAACAGGAGGTGAGGACATTTGAGCCGCAAGTCCATACAACCTGGCTGGGTGGCAT  
SRR516978.43755925.2- ATGACGAACAGGAGGTGATGACATTTGAGCCGCAAGTCCATACAACCTGGCTGGGTGGCAT  
SRR516978.60869002.2+ ATGACGAACAGGAGGTGATGACATTTGAGCCGCAAGTCCATACAACCTGGCTGGGTGGCAT  
SRR516978.65078285.1- ATGACGAACAGGAGGTGATGACATTTGAGCCGCAAGTCCATACAACCTGGCTGGGTGGCAT  
SRR516979.10675489.2+ ATGATGAACAGGAGGTGATGACATTTGAGCCGCAAGTCCATACAACCTGGCTGGGTGGCAT  
SRR516979.1430425.1- ATGACGAACAGGAGGTGATGACATTTGAGCCGCAAGTCCATACAACCTGGCTGGGTGGCAT  
SRR516979.6140788.2+ ATGACGAACAGGAGGTGATGACATTTGAGCCGCAAGTCCATACAACCTGGCTGGGTGGCAT  
SRR516980.12955843.2- ATGACGAACAGGAGGTGATGACATTTGAGCCGCAAGTCCATACAACCTGGCTGGGTGGCAT  
SRR516980.19111556.1- ATGACGAACAGGAGGTGATGACATTTGAGCCGCAAGTCCATACAACCTGGCTGGGTGGCAT  
SRR516980.30549936.1- ATGACGAACAGGAGGTGATGACATTTGAGCCGCAAGTCCATACAACCTGGCTGGGTGGCAT  
SRR516980.32208306.1- ATGACGAACAGGAGGTGATGACATTTGAGCCGCAAGTCCATACAACCTGGCTGGGTGGCAT  
SRR516980.37499938.1+ ATGACGAACAGGAGGTGATGACATTTGAGCCGCAAGTCCATACAACCTGGCTGGGTGGCAT  
SRR516980.63928031.1- ATGACGAACAGGAGGTGATGACATTTGAGCCGCAAGTCCATACAACCTGGCTGGGTGGCAT  
SRR516982.56632493.1+ ATGATGAACAGGAGGTGATGACATTTGAGCCGCAAGTCCATACAACCTGGCTGGGTGGCAT  
SRR516983.41490614.2- ATGACGAACAGGAGGTGATGACATTTGAGCCGCAAGTCCATACAACCTGGCTGGGTGGCAT  
SRR516983.43684823.1- ATGACGAACAGGAGGTGATGACATTTGAGCCGCAAGTCCATACAACCTGGCTGGGTGGCAT  
SRR516983.54306814.2- ATGACGAACAGGAGGTGATGACATTTGAGCCGCAAGTCCATACAACCTGGCTGGGTGGCAT  
SRR516983.60674262.1- ATGACGAACAGGAGGTGATGACATTTGAGCCGCAAGTCCATACAACCTGGCTGGGTGGCAT  
SRR516983.94153626.2+ ATGACGAACAGGAGGTGATGACATTTGAGCCGCAAGTCCATACAACCTGGCTGGGTGGCAT  
SRR516984.50030865.2+ ATGACGAACAGGAGGTGATGACATTTGAGCCGCAAGTCCATACAACCTGGCTGGGTGGCAT  
SRR516984.56347101.1- ATGACGAACAGGAGGTGATGACATTTGAGCCGCAAGTCCATACAACCTGGCTGGGTGGCAT  
SRR516984.6819096.2- ATGACGATCAGGAGGTGATGACATTTGAGCCGCAAGTCCATACAACCTGGCTGGGTGGCAT  
SRR516985.70259889.1- ATGACGAACAGGAGGTGATGACATTTGAGCCGCAAGTCCATACAACCTGGCTGGGTGGCAT  
SRR516985.77238548.2- ATGACGAACAGGAGGTGATGACATTTGAGCCGCAAGTCCATACAACCTGGCTGGGTGGCAT  
SRR516986.10287761.2+ ATGACGAACAGGAGGTGATGACATTTGAGCCGCAAGTCCATACAACCTGGCTGGGTGGCAT  
SRR516987.36431135.1- ATGACGAACAGGAGGTGATGACATTTGAGCCGCAAGTCCATACAACCTGGCTGGGTGGCAT  
SRR516988.2929307.2- ATGACGAACAGGAGGTGATGACATTTGAGCCGCAAGTCCATACAACCTGGCTGGGTGGCAT  
SRR516988.31050597.2+ ATGACGAACAGGAGGTGATGACATTTGAGCCGCAAGTCCATACAACCTGGCTGGGTGGCAT  
SRR516988.32844820.2- ATGACGAACAGGAGGTGATGACATTTGAGCCGCAAGTCCATACAACCTGGCTGGGTGGCAT  
SRR516989.14777251.1+ ATGACGAACAGGAGGTGATGACATTTGAGCCGCAAGTCCATACAACCTGGCTGGGTGGGAA

SRR516989.21621378.1+ ATGACGAACAGGAGGTGATGACATTTGAGCCGCAAGTCCATACAACCTGGCTGGGTGGCAT  
SRR516989.36153179.1+ ATGACGAACAGGAGGTGATGACATTTGAGCCGCAAGTCCATACAACCTGGCTGGGTGGCAT  
SRR516989.46904169.2+ ATGACGAACAGGAGGTGATGACATTTGAGCCGCAAGTCCATACAACCTGGCTGGGTGGCAT  
SRR516989.75746913.1- ATGACGAACAGGAGGTGATGACATTTGAGCCGCAAGTCCATACAACCTGGCTGGGTGGCAT  
SRR516989.8534348.1- ATGACGAACAGGAGGTGATGACATTTGAGCCGCAAGTCCATACAACCTGGCTGGGTGGCAT  
SRR516990.20970250.1+ ATGACGAACAGGAGGTGATGACATTTGAGCCGCAAGTCCATACAACCTGGCTGGGGGGGCAT  
SRR516990.21735027.2- ATGACGAACAGGAGGTGATGACATTTGAGCCGCAAGTCCATACAACCTGGCTGGGTGGCAT  
SRR516990.32569854.2- ATGACGAACAGGAGGTGATGACATTTGAGCCGCAAGTCCATACAACCTGGCTGGGTGGCAT  
SRR516990.55302390.2- ATGACGAACAGGAGGTGATGACATTTGAGCCGCAAGTCCATACAACCTGGCTGGGTGGCAT  
SRR516990.68475801.1+ ATGACGAACAGGAGGTGATGACATTTGAGCCGCAAGTCCATACAACCTGGCTGGGTGGCAT  
SRR516991.17318347.2- ATGACGAACAGGAGGTGATGACATTTGAGCCGCAAGTCCATACAACCTGGCTGGGTGGCAT  
SRR516991.1931100.1- ATGATGAACAGGAGGTGATGACATTTGAGCCGCAAGTCCATACAACCTGGCTGGTTGGCAT  
SRR516991.24878492.1- ATGACGAACAGGAGGTGATGACATTTGAGCCGCAAGTCCATACAACCTGGCTGGGTGGCAT  
SRR516991.30740799.1+ ATGACGAACAGGAGGTGATGACATTTGAGCCGCAAGTCCATACAACCTGGCTGGGTGGCAT  
SRR516991.49815040.2+ ATGATGAACAGGAGGTGATGACATTTGAGCCGCAAGTCCATACAACCTGGCTGGTTGGCAT  
SRR516991.7741780.1- ATGATGAACAGGAGGTGATGACATTTGAGCCGCAAGTCCATACAACCTGGCTGGTTGGCAT  
SRR516992.10103608.1+ ATGACGAACAGGAGGTGATGACATTTGAGCCGCAAGTCCATACAACCTGGCTGGGTGGCAT  
SRR516992.23178703.2- ATGACGAACAGGAGGTGATGACATTTGAGCCGCAAGTCCATACAACCTGGCTGGGTGGCAT  
SRR516992.37277386.2- ATGACGAACAGGAGGTGATGACATTTGAGCCGCAAGTCCATACAACCTGGCTGGGTGGCAT  
SRR516992.63008789.1- ATGACGAACAGGAGGTGATGACATTTGAGCCGCAAGTCCATACAACCTGGCTGGGTGGCAT  
SRR516992.78662263.1- ATGACGAACAGGAGGTGATGACATTTGAGCCGCAAGTCCATACAACCTGGCTGGGTGGCAT  
SRR516992.79918999.2+ ATGACGAACAGGAGGTGATGACATTTGAGCCGCAAGTCCATACAACCTGGCTGGGTGGCAT  
SRR516993.12312704.1- ATGACGAACAGGAGGTGATGACATTTGAGCTGCAAGTCCATACAACCTGGCTGGGTGGCAT  
SRR516993.1447601.1+ ATGACGAACAGGAGGTGATGACATTTGAGCTGCAAGTCCATACAACCTGGCTGGGTGGCAT  
SRR516993.49833109.2- ATGACGAACAGGAGGTGATGACATTTGAGCTGCAAGTCCATACAACCTGGCTGGTTGGCAT  
SRR516993.73082870.1- ATGACGAACAGGAGGTGATGACATTTGAGCTGCAAGTCCATACAACCTGGCTGGGTGGCAT  
SRR516993.75065526.2+ ATGACGAACAGGAGGTGATGACATTTGAGCCGCAAGTCCATACAACCTGGCTGGGTGGCAT  
SRR516993.83887266.1+ ATGACGAACAGGAGGTGATGACATTTGAGCTGCAAGTCCATACAACCTGGCTGGGTGGCAT  
SRR516994.1794759.2+ ATGACGAACAGGAGGTGATGACATTTGAGCCGCAAGTCCATACAACCTGGCTGGGTGGCAT  
SRR516994.35326807.2- ATGACGAACAGGAGGTGATGACATTTGAGCCGCAAGTCCATACAACCTGGCTGGGTGGCAT  
SRR516994.76691379.2- ATGACGAACAGGAGGTGATGACATTTGAGCCGCAAGTCCATACAACCTGGCTGGGTGGCAT  
SRR516994.78306274.2+ ATGACGAACAGGAGGTGATGACATTTGAGCCGCAAGTCCATACAACCTGGCTGGGTGGCAT  
SRR516994.82514123.2+ ATGACGAACAGGAGGTGATGACATTTGAGCCGCAAGTCCATACAACCTGGCTGGGTGGCAT  
SRR516995.15167538.1+ ATGACGAACAGGAGGTGATGACATTTGAGCTGCAAGTCCATACAACCTGGCTGGGTGGCAT  
SRR516995.15254844.2- ATGACGAACAGGAGGTGATGACATTTGAGCTGCAAGTCCATACAACCTGGCTGGGTGGCAT  
SRR516995.43808656.1- ATGACGAACAGGAGGTGATGACATTTGAGCCGCAAGTCCATACAACCTGGCTGGGTGGCAT  
SRR516995.74299668.1+ ATGACGAACAGGAGGTGATGACATTTGAGCCGCAAGTCCATACAACCTGGCTGGGTGGCAT  
SRR516996.1617304.1+ ATGACGAACAGGAGGTGATGACATTTGAGCCGCAAGTCCATACAACCTGGCTGGGGGGGCAT  
SRR516996.29500035.2- ATGACGAACAGGAGGTGATGACATTTGAGCCGCAAGTCCATACAACCTGGCTGGGTGGCAT  
SRR516996.36234607.1+ ATGACGAACAGGAGGTGATGACATTTGAGCCGCAAGTCCATACAACCTGGCTGGGGGGGCAT  
SRR516996.52900642.2- ATGACGAACAGGAGGTGATGACATTTGAGCCGCAAGTCCATACAACCTGGCTGGGTGGCAT  
SRR516996.85884676.2- ATGACGAACAGGAGGTGATGACATTTGAGCCGCAAGTCCATACAACCTGGCTGGGTGGCAT  
SRR516996.88424796.2- ATGACGAACAGGAGGTGATGACATTTGAGCCGCAAGTCCATACAACCTGGCTGGGTGGCAT  
SRR516997.25946564.1- ATGATGAACAGGAGGTGATGACATTTGAGCCGCAAGTCCATACAACCTGGCTGGTTGGCAT  
SRR516997.44735578.1- ATGACGAACAGGAGGTGATGACATTTGAGCCGCAAGTCCATACAACCTGGCTGGGTGGCAT  
SRR516997.5744761.2- ATGACGAACAGGAGGTGATGACATTTGAGCCGCAAGTCCATACAACCTGGCTGGGTGGCAT  
SRR516997.66381769.1- ATGACGAACAGGAGGTGATGACATTTGAGCCGCAAGTCCATACAACCTGGCTGGGTGGCAT  
SRR516997.93541116.1- ATGACGAACAGGAGGTGATGACATTTGAGCCGCAAGTCCATACAACCTGGCTGGGTGGCAT  
SRR516998.43983662.1- ATGACGAACAGGAGGTGATGACATTTGAGCCGCAAGTCCATACAACCTGGCTGGGTGGCAT  
SRR516998.57969943.1- ATGACGAACAGGAGGTGATGGCATTGAGCCGCAAGTCCATACAACCTGGCTGGGTGGCAT  
SRR516999.15040710.1- ATGACGAACAGGAGGTGATGACATTTGAGCCGCAAGTCCATACAACCTGGCTGGGTGGCAT  
SRR516999.36234607.1- ATGACGAACAGGAGGTGATGACATTTGAGCCGCAAGTCCATACAACCTGGCTGGGTGGCAT  
SRR516999.61456648.1+ ATGACGAACAGGAGGTGATGACATTTGAGCCGCAAGTCCATACAACCTGGCTGGGGGGGCAT  
SRR516999.61850545.2+ ATGACGAACAGGAGGTGATGACATTTGAGCCGCAAGTCCATACAACCTGGCTGGGTGGCAT  
SRR516999.7152611.2+ ATGACGAACAGGAGGTGATGACATTTGAGCCGCAAGTCCATACAACCTGGCTGGGTGGCAT  
SRR516999.81087074.2+ ATGACGAACAGGAGGTGATGACATTTGAGCCGCAAGTCCATACAACCTGGCTGGGTGGCAT  
SRR516999.96819542.2- ATGACGAACAGGAGGTGATGACATTTGAGCCGCAAGTCCATACAACCTGGCTGGGTGGCAT  
SRR517000.23191480.1+ ATGACGAACAGGAGGTGATGACATTTGAGCCGCAAGTCCATACAACCTGGCTGGGTGGCAT  
SRR517000.37586981.1+ ATGACGAACAGGAGGTGATGACATTTGAGCCGCAAGTCCATACAACCTGGCTGGGTGGCAT  
SRR517000.39251131.1- ATGACGAACAGGAGGTGATGACATTTGAGCCGCAAGTCCATACAACCTGGCTGGGGGGGCAT  
SRR517000.49710061.1- ATGACGAACAGGAGGTGATGACATTTGAGCCGCAAGTCCATACAACCTGGCTGGGTGGCAT  
SRR517000.81566989.1+ ATGACGAACAGGAGGTGATGACATTTGAGCCGCAAGTCCATACAACCTGGCTGGGTGGCAT  
SRR517000.9053207.1- ATGACGAACAGGAGGTGATGACATTTGAGCCGCAAGTCCATACAACCTGGCTGGGTGGCAT  
SRR517000.94486378.2- ATGACGAACAGGAGGTGATGACATTTGAGCCGCAAGTCCATACAACCTGGCTGGGTGGCAT  
SRR517001.16403167.2- ATGACGAACAGGAGGTGATGACATTTGAGCCGCAAGTCCATACAACCTGGCTGGGTGGCAT  
SRR517001.26562166.2- ATGACGAACAGGAGGTGATGACATTTGAGCCGCAAGTCCATACAACCTGGCTGGGTGGCAT  
SRR517001.31582093.1- ATGACGAACAGGAGGTGATGACATTTGAGCCGCAAGTCCATACAACCTGGCTGGGTGGCAT  
SRR517001.36464132.1- ATGACGAACAGGAGGTGATGACATTTGAGCCGCAAGTCCATACAACCTGGCTGGGTGGCAT  
SRR517001.43347006.1- ATGACGAACAGGAGGTGATGACATTTGAGCCGCAAGTCCATACAACCTGGCTGGGTGGCAT  
SRR517001.8564550.1+ ATGACGAACAGGAGGTGATGACATTTGAGCCGCAAGTCCATACAACCTGGCTGGGTGGCAT  
SRR517001.89049728.2+ ATGACGAACAGGAGGTGATGACATTTGAGCCGCAAGTCCATACAACCTGGCTGGGTGGGT  
SRR517002.29394887.2+ ATGACGAACAGGAGGTGATGACATTTGAGCCGCAAGTCCATACAACCTGGCTGGGGGGGCAT  
SRR517002.48542308.2- ATGACGAACAGGAGGTGATGACATTTGAGCCGCAAGTCCATACAACCTGGCTGGGTGGCAT  
SRR517002.51438896.1- ATGACGAACAGGAGGTGATGACATTTGAGCCGCAAGTCCATACAACCTGGCTGGGTGGCAT  
SRR517002.62107602.1- ATGACGAACAGGAGGTGATGACATTTGAGCCGCAAGTCCATACAACCTGGCTGGGTGGCAT  
SRR517002.68785810.2+ ATGACGAACAGGAGGTGATGACATTTGAGCCGCAAGTCCATACAACCTGGCTGGGTGGCAT  
SRR517002.80851214.2- ATGACGAACAGGAGGTGATGACATTTGAGCCGCAAGTCCATACAACCTGGCTGGGTGGCAT  
SRR517002.8665886.2- ATGACGAACAGGAGGTGATGACATTTGAGCCGCAAGTCCATACAACCTGGCTGGGTGGCAT  
SRR517003.42514893.2- ATGACGAACAGGAGGTGATGACATTTGAGCCGCAAGTCCATACAACCTGGCTGGGTGGCAT  
SRR517003.48327823.1+ ATGACGAACAGGAGGTGATGACATTTGAGCCGCAAGTCCATACAACCTGGCTGGGTGGCAT  
SRR517003.63008308.1- ATGACGAACAGGAGGTGATGACATTTGAGCCGCAAGTCCATACAACCTGGCTGGGTGGCAT  
SRR517003.70018023.2- ATGACGAACAGGAGGTGATGACATTTGAGCCGCAAGTCCATACAACCTGGCTGGGTGGCAT  
SRR517003.70967985.2+ ATGACGAACAGGAGGATGACATTTGAGCCGCAAGTCCATACAACCTGGCTGGGGGGGCAT  
SRR517003.73936435.2- ATGACGAACAGGAGGTGATGACATTTGAGCCGCAAGTCCATACAACCTGGCTGGGTGGCAT

SRR517003.87371479.1+ ATGACGAACAGGAGGTGATGACATTTGAGCCGCAAGTCCATACAACCTGGCTGGGTGGCAT  
SRR517004.34678058.2- ATGACGAACAGGAGGTGATGACATTTGAGCCGCAAGTCCATACAACCTGGCTGGGTGGCAT  
SRR517004.40113226.2+ ATGACGAACAGGAGGTGATGACATTTGAGCCGCAAGTCCATACAACCTGGCTGGGTGGCAT  
SRR517004.45940969.1+ ATGACGAACAGGAGGTGATGACATTTGAGCCGCAAGTCCATACAACCTGGCTGGGTGGCAT  
SRR517004.53693916.2- ATGACGAACAGGAGGTGATGACATTTGAGCCGCAAGTCCATACAACCTGGCTGGGTGGCAT  
SRR517004.58862282.1+ ATGACGAACAGGAGGTGATGACATTTGAGCCGCAAGTCCATACAACCTGGCTGGGGGGGCAT  
SRR517005.17700561.1- ATGACGAACAGGAGGTGATGACATTTGAGCCGCAAGTCCATACAACCTGGCTGGGTGGCAT  
SRR517005.54428488.2+ ATGACGAACAGGAGGTGATGACATTTGAGCCGCAAGTCCATACAACCTGGCTGGGTGGCGT  
SRR517005.66404474.1+ ATGACGAACAGGAGGTGATGACATTTGAGCCGCAAGTCCATACAACCTGGCTGGGTGGCAT  
SRR517005.886243.1- ATGACGAACAGGAGGTGATGACATTTGAGCCGCAAGTCCATACAACCTGGCTGGGTGGCAT  
SRR517005.97095694.1- ATGACGAACAGGAGGTGATGACATTTGAGCCGCAAGTCCATACAACCTGGCTGGGTGGCAT  
SRR517006.43208825.1- ATGACGAACAGGAGGTGATGACATTTGAGCCGCAAGTCCATACAACCTGGCTGGGTGGCAT  
SRR517006.62045893.2- ATGACGAACAGGAGGTGATGACATTTGAGCCGCAAGTCCATACAACCTGGCTGGGTGGCAT  
SRR517006.79064283.2- ATGACGAACAGGAGGTGATGACATTTGAGCCGCAAGTCCATACAACCTGGCTGGGTGGCAT  
SRR517006.8552318.1- ATGACGAACAGGAGGTGATGACATTTGAGCCGCAAGTCCATACAACCTGGCTGGGTGGCAT  
SRR517007.20187658.2- ATGACGAACAGGAGGTGATGACATTTGAGCCGCAAGTCCATACAACCTGGCTGGGTGGCAT  
SRR517007.44465454.2- ATGACGAACAGGAGGTGATGACATTTGAGCCGCAAGTCCATACAACCTGGCTGGGTGGCAT  
SRR517007.5128092.2- ATGACGAACAGGAGGTGATGACATTTGAGCCGCAAGTCCATACAACCTGGCTGGGTGGCAT  
SRR517007.55411417.1+ ATGACGAACAGGAGGTGATGACATTTGAGCCGCAAGTCCATACAACCTGGCTGGGTGGCAT  
SRR517008.37417547.1+ ATGACGAACAGGAGGTGATGACATTTGAGCCGCAAGTCCATACAACCTGGCTGGGTGGCAT  
SRR517008.53563245.1- ATGACGAACAGGAGGTGATGACATTTGAGCCGCAAGTCCATACAACCTGGCTGGGTGGCAT  
SRR517009.2225310.1- ATGACGAACAGGAGGTGATGACATTTGAGCTGCAAGTCCATACAACCTGGCTGGGTGGCAT  
SRR517009.28589393.1- ATGACGAACAGGAGGTGATGACATTTGAGCCGCAAGTCCATACAACCTGGCTGGGTGGCAT  
SRR517009.31830082.2- ATGACGAACAGGAGGTGATGACATTTGAGCCGCAAGTCCATACAACCTGGCTGGGTGGCAT  
SRR517009.38612123.1+ ATGACGAACAGGAGGTGATGACATTTGAGCCGCAAGTCCATACAACCTGGCTGGGTGGCAT  
SRR517009.51801045.2+ ATGACGAACAGGAGGTGATGACATTTGAGCCGCAAGTCCATACAACCTGGCTGGGTGGCAT  
SRR517009.70794059.2+ ATGACGAACAGGAGGTGATGACATTTGAGCCGCAAGTCCATACAACCTGGCTGGGTGGCAT  
SRR517009.74653167.2- ATGACGAACAGGAGGTGATGACATTTGAGCTGCAAGTCCATACAACCTGGCTGGGTGGCAT  
SRR517009.89416108.1+ ATGACGAACAGGAGGTGATGACATTTGAGCCGCAAGTCCATACAACCTGGCTGGGTGGCAT  
SRR511912.13524230.1+ TGACGAACAGGAGGTGATGACATTTGAGCCGCAAGTCCATACAACCTGGCTGGGTGGCAT  
SRR516969.1006309.2- TGACGAACAGGAGGTGATGACATTTGAGCCGCAAGTCCATACAACCTGGCTGGGTGGCAT  
SRR516981.62232392.2+ TGACGAACAGGAGGTGATGACATTTGAGCCGCAAGTCCATACAACCTGGCTGGGTGGCAT  
SRR516988.35895455.2+ TGACGAACAGGAGGTGATGACATTTGAGCCGCAAGTCCATACAACCTGGCTGGGTGGCAT  
SRR516999.67197738.1- TGACGAACAGGAGGTGATGACATTTGAGCCGCAAGTCCATACAACCTGGCTGGGTGGCAT  
SRR511916.21097229.2- GACGAACAGGAGGTGATGACATTTGAGCCGCAAGTCCATACAACCTGGCT  
SRR511917.35725322.2- GACGAACAGGAGGTGATGACATTTGAGCCGCAAGTCCATACAACCTGGCT  
SRR511917.62920284.2- GACGAACAGGAGGTGATGACATTTGAGCCGCAAGTCCATACAACCTGGCT  
SRR516970.29220836.2- GACGAACAGGAGGTGATGACATTTGAGCCGCAAGTCCATACAACCTGGCTGGGTGGCAT  
SRR516970.30280066.2- GACGAACAGGAGGTGATGACATTTGAGCCGCAAGTCCATACAACCTGGCTGGGTGGCAT  
SRR516981.70866488.1- GACGAACAGGAGGTGATGACATTTGAGCCGCAAGTCCATACAACCTGGCTGGGTGGCAT  
SRR516998.31606571.1+ GACGAACAGGAGGTGATGACATTTGAGCCGCAAGTCCATACAACCTGGCTGGGTGGCAT  
SRR517003.51023813.2- GACGAACAGGAGGTGATGACATTTGAGCCGCAAGTCCATACAACCTGGCTGGGTGGCAT  
SRR511915.64989562.1- ACGAACAGGAGGTGATGACATTTGAGCCGCAAGTCCATACAACCTGGCTGGGTGGCAT  
SRR511915.64989699.1- ACGAACAGGAGGTGATGACATTTGAGCCGCAAGTCCATACAACCTGGCTGGGTGGCAT  
SRR516967.5677042.1- ACGAACAGGAGGTGATGACATTTGAGCCGCAAGTCCATACAACCTGGCTGGGTGGCAT  
SRR516978.52566920.2- ACGAACAGGATTTGATGACATTTGAGCCGCAAGTCCATACAACCTGGCTGGGTGGCAT  
SRR516992.40366624.2- ACGAACAGGAGGTGATGACATTTGAGCCGCAAGTCCATACAACCTGGCTGGGTGGCAT  
SRR516992.67474202.2+ ACGAACAGGAGGTGATGACATTTGAGCCGCAAGTCCATACAACCTGGCTGGGTGGCAT  
SRR516992.79411570.1- ACGAACAGGAGGTGATGACATTTGAGCCGCAAGTCCATACAACCTGGCTGGGTGGCAT  
SRR516998.45967480.1- ACGAACAGGAGGTGATGACATTTGAGCCGCAAGTCCATACAACCTGGCTGGGTGGCAT  
SRR517001.81299431.1+ ACGAACAGGAGGTGATGACATTTGAGCCGCAAGTCCATACAACCTGGCTGGGTGGCAT  
SRR511892.9368196.1+ CGAACAGGAGGTGATGACATTTGAGCCGCAAGTCCATACAACCTGGCTGGGTGGCAT  
SRR511911.54079531.2+ CGAACAGGAGGTGATGACATTTGAGCCGCAAGTCCATACAACCTGGCTGGGTGGCAT  
SRR516981.21374378.2- CGAACAGGAGGTGATGACATTTGAGCCGCAAGTCCATACAACCTGGCTGGGTGGCAT  
SRR516993.5077793.2+ CGAACAGGAGGTGATGACATTTGAGCTGCAAGTCCATACAACCTGGCTGGGTGGCAT  
SRR516996.75662898.1- CGAACAGGAGGTGATGACATTTGAGCCGCAAGTCCATACAACCTGGCTGGGTGGCAT  
SRR517004.41051761.2+ CGAACAGGAGGTGATGACATTTGAGCCGCAAGTCCATACAACCTGGCTGGGTGGCAT  
SRR517005.46088960.1- CGAACAGGAGGTGATGACATTTGAGCCGCAAGTCCATACAACCTGGCTGGGTGGCAT  
SRR517009.48171529.2- CGAACAGGAGGTGATGACATTTGAGCTGCAAGTCCATACAACCTGGCTGGGTGGCAT  
SRR511916.33544803.1+ GAACAGGAGGTGATGACATTTGAGCCGCAAGTCCATACAACCTGGCTGGG  
SRR511916.64388886.2+ GAACAGGAGGTGATGACATTTGAGCCGCAAGTCCATACAACCTGGCTGGG  
SRR511916.64388890.2+ GAACAGGAGGTGATGACATTTGAGCCGCAAGTCCATACAACCTGGCTGGG  
SRR516970.7484751.2+ GAACAGGAGGTGATGACATTTGAGCCGCAAGTCCATACAACCTGGCTGGGTGGCAT  
SRR516984.53836077.1- GAACAGGAGGTGATGACATTTGAGCCGCAAGTCCATACAACCTGGCTGGGTGGCAT  
SRR516988.7333166.1- GAACAGGAGGTGATGACATTTGAGCCGCAAGTCCATACAACCTGGCTGGGTGGCAT  
SRR516994.20458023.1+ GAACAGGAGGTGATGACATTTGAGCCGCAAGTCCATACAACCTGGCTGGGTGGCAT  
SRR516994.6814432.2+ GAACAGGAGGTGATGACATTTGAGCCGCAAGTCCATACAACCTGGCTGGGTGGCAT  
SRR516996.49779749.1+ GAACAGGAGGTGATGACATTTGAGCCGCAAGTCCATACAACCTGGCTGGGTGGCAT  
SRR517000.103614309.2+ GAACAGGAGGAGATGACATTTGAGCCCAAGGCCATACAACCTGGCTGGGAGGCAT  
SRR517008.68021994.2- GAACAGGAGGTGATGACATTTGAGCCGCAAGTCCATACAACCTGGCTGGGTGGCAT  
SRR511916.23726709.2- AACAGGAGGTGATGACATTTGAGCCGCAAGTCCATACAACCTGGCTGGGT  
SRR511916.25107412.2+ AACAGGAGGTGATGACATTTGAGCCGCAAGTCCATACAACCTGGCTGGGT  
SRR511916.54907786.2- AACAGGAGGTGATGACATTTGAGCCGCAAGTCCATACAACCTGGCTGGGT  
SRR511917.60109382.2- AACAGGAGGTGATGACATTTGAGCCGCAAGTCCATACAACCTGGCTGGGT  
SRR511917.7621459.2- AACAGGAGGTGATGACATTTGAGCCGCAAGTCCATACAACCTGGCTGGGT  
SRR516968.123158278.1+ AACAGGAGGTGATGACATTTGAGCCGCAAGTCCATACAACCTGGCTGGGTGGCAT  
SRR516978.37914558.1+ AACAGGAGGTGATGACATTTGAGCCGCAAGTCCATACAACCTGGCTGGGTGGCAT  
SRR516981.46321294.2+ AACAGGAGGTGATGACATTTGAGCCGCAAGTCCATACAACCTGGCTGGGTGGCAT  
SRR516989.64914875.2- AACAGGAGGTGATGACATTTGAGCCGCAAGTCCATACAACCTGGCTGGGTGGCAT  
SRR516996.32218127.1- AACAGGAGGTGATGACATTTGAGCCGCAAGTCCATACAACCTGGCTGGGTGGCAT  
SRR516998.88636739.2- AACAGGAGGTGATGACATTTGAGCCGCAAGTCCATACAACCTGGCTGGGTGGCAT  
SRR517002.99266758.2+ AACAGGAGGTGATGACATTTGAGACGCAAGTCCATACAACCTGGATGGGAGGCAT  
SRR517006.17938695.2+ AACAGGAGGTGATGACATTTGAGCCGCAAGTCCATACAACCTGGCTGGGTGGCAT  
SRR511911.1070600.2+ ACAGGAGGTGATGACATTTGAGCCGCAAGTCCATACAACCTGGCTGGGTGGCAT













|                        |                    |
|------------------------|--------------------|
| SRR511911.38218078.2-  | TTGGATTC           |
| SRR516967.94416127.1-  | TTGGATTC           |
| SRR516974.29282850.1+  | TTGGATTC           |
| SRR516977.10878176.2-  | TTGGATTC           |
| SRR516986.10287761.2+  | TTGGATTC           |
| SRR516991.49815040.2+  | TTGGATTC           |
| SRR517003.70967985.2+  | TTGGATTC           |
| SRR517004.40113226.2+  | TTGGATTC           |
| SRR511916.62302427.1+  | TTGGATTCA          |
| SRR511916.67819900.1+  | TTGGATTCA          |
| SRR516977.12820030.2+  | TTGGATTCA          |
| SRR516989.8534348.1-   | TTGGATTCA          |
| SRR516991.17318347.2-  | TTGGATTCA          |
| SRR516991.1931100.1-   | TTGGATTCA          |
| SRR516991.24878492.1-  | TTGGATTCA          |
| SRR516995.74299668.1+  | TTGGATTCA          |
| SRR517000.37586981.1-  | TTGGATTCA          |
| SRR517001.36464132.1-  | TTGGATTCA          |
| SRR517005.886243.1-    | TTGGATTCA          |
| SRR516968.43850003.2-  | TTGGATTCAG         |
| SRR516975.22417896.2+  | TTGGATTCAG         |
| SRR516976.36876145.1+  | TTGGATTCAG         |
| SRR516979.6140788.2+   | TTGGATTCAG         |
| SRR516989.14777251.1+  | TTGGATTCAG         |
| SRR516994.78306274.2+  | TTGGATTCAG         |
| SRR516997.5744761.2-   | TTGGATTCAG         |
| SRR517002.68785810.2+  | TTGGATTCAG         |
| SRR516967.100239201.1+ | TTGGATTCAGC        |
| SRR516968.54367312.2+  | TTGGATTCAGC        |
| SRR516992.79918999.2+  | TTGGATTCAGC        |
| SRR516996.52900642.2-  | TTGGATTCAGC        |
| SRR511915.717767.2+    | TTGGATTCAGCC       |
| SRR511916.29283073.1+  | TTGGATTCAGCC       |
| SRR516998.57969943.1-  | TTGGATTCAGCC       |
| SRR516999.61456648.1+  | TTGGATTCAGCC       |
| SRR517001.8564550.1+   | TTGGATTCAGCC       |
| SRR511917.48425344.1-  | TTGGATTCAGCCC      |
| SRR516967.135591639.1+ | TTGGATTCAGCCC      |
| SRR516967.57741754.1+  | TTGGATTCAGCCC      |
| SRR516992.10103608.1+  | TTGGATTCAGCCC      |
| SRR516993.1447601.1+   | TTGGATTCAGCCC      |
| SRR516994.82514123.2+  | TTGGATTCAGCCC      |
| SRR516999.7152611.2+   | TTGGATTCAGCCC      |
| SRR517002.8665886.2-   | TTGGATTCAGCCC      |
| SRR517005.66404474.1+  | TTGGATTTAGCCC      |
| SRR516968.108661732.1- | TTGGATTCAGCCCT     |
| SRR516973.16904597.1-  | TTGGATTCAGCCCT     |
| SRR516973.16906873.1-  | TTGGATTCAGCCCT     |
| SRR516976.57348554.2-  | TTGGATTCAGCCCT     |
| SRR516980.63928031.1-  | TTGGATTCAGCCCT     |
| SRR517004.34678058.2-  | TTGGATTCAGCCCT     |
| SRR517008.53563245.1-  | TTGGATTCAGCCCT     |
| SRR516990.68475801.1+  | TTGGATTCAGCCCTC    |
| SRR516994.35326807.2-  | TTGGATTCAGCCCTC    |
| SRR516999.61850545.2+  | TTGGATTCAGCCCTC    |
| SRR511912.83293905.1+  | TTGGATTCAGCCCTCA   |
| SRR516985.70259889.1-  | TTGGATTCAGCCCTCA   |
| SRR516987.36431135.1-  | TTGGATTCAGCCCTCA   |
| SRR516987.44128152.2+  | TTGGATTTAGCCCTCA   |
| SRR516989.21621378.1+  | TTGGATTCAGCCCTCA   |
| SRR516991.7741780.1-   | TTGGATTCAGCCCTCA   |
| SRR516995.15254844.2-  | TTGGATTCAGCCCTCA   |
| SRR511911.60280636.2+  | TTGGATTCAGCCCTCCT  |
| SRR511913.22705507.2-  | TTGGATTCAGCCCTCAT  |
| SRR516967.138148601.1- | TTGGATTCAGCCCTCAT  |
| SRR516968.164894710.1+ | TTGGATTCAGCCCTCAT  |
| SRR516980.37499938.1+  | TTGGATTCAGCCCTCCT  |
| SRR516983.43684823.1-  | TTGGATTCAGCCCTCAT  |
| SRR516983.94153626.2+  | TTGGATTCAGCCCTCAT  |
| SRR516995.43808656.1-  | TTGGATTCAGCCCTCAT  |
| SRR516997.25946564.1-  | TTGGATTCAGCCCTCAT  |
| SRR516997.44735578.1-  | TTGGATTCAGCCCTCAT  |
| SRR517000.49710061.1-  | TTGGATTCAGCCCTCAT  |
| SRR517003.70018023.2-  | TTGGATTCAGCCCTCAT  |
| SRR511914.41285120.1-  | TTGGATTCAGCCCTCATG |
| SRR511914.56122848.1+  | TTGGATTCAGCCCTCATG |
| SRR511915.73501967.1-  | TTGGATTCAGCCCTCATG |
| SRR516968.8958322.1+   | TTGGATTCAGCCCTCATG |
| SRR516975.59637801.2-  | TTGGATTCAGCCCTCATG |
| SRR516977.57408704.1+  | TTGGATTCAGCCCTCATG |
| SRR516980.12955843.2-  | TTGGATTCAGCCCTCATG |
| SRR516983.60674262.1-  | TTGGATTCAGCCCTCATG |
| SRR516989.75746913.1-  | TTGGATTCAGCCCTCATG |
| SRR516992.63008789.1-  | TTGGATTCAGCCCTCATG |

SRR516997.93541116.1- TTGGATTCAGCCCTCATG  
SRR517007.55411417.1+ TTGGATTCAGCCCTCATG  
SRR517009.31830082.2- TTGGATTCAGCCCTCATG  
SRR517009.74653167.2- TTGGATTCAGCCCTCATG  
SRR516978.37638949.1- TTGGATTCAGCCCTCATGG  
SRR516979.1430425.1- TTGGATTCAGCCCTCATGG  
SRR516988.31050597.2+ TTGGATTCAGCCCTCATGG  
SRR516994.1794759.2+ TTGGATTCAGCCCTCATGG  
SRR517006.62045893.2- TTGGATTCAGCCCTCATGG  
SRR517007.44465454.2- TTGGATTCAGCCCTCATGG  
SRR511911.7460180.1- TTGGATTCAGCCCTCATGGA  
SRR511912.59893234.1+ TTGGGTTCCGCCCCCATGGA  
SRR516976.29296347.1- TTGGATTCAGCCCTCATGGA  
SRR516977.13189923.1+ TTGGATTCAGCCCTCATGGA  
SRR516984.56347101.1- TTGGATTCAGCCCTCATGGA  
SRR517009.38612123.1+ TTGGATTCAGCCCTCATGGA  
SRR511912.63185956.1+ TTGGATTCAGCCCTCATGGAG  
SRR516967.34973661.1+ TTGGATTCAGCCCTCATGGAG  
SRR516973.61866208.2+ TTGGATTCAGCCCTCATGGAG  
SRR516976.10068918.1- TTGGATTCAGCCCTCATGGAG  
SRR516976.8946365.1- TTGGATTCAGCCCTCATGGAT  
SRR516992.37277386.2- TTGGATTCAGCCCTCATGGAG  
SRR516992.78662263.1- TTGGATTCAGCCATCATGGAG  
SRR516996.85884676.2- TTGGATTCAGCCCTCATGGAG  
SRR516997.66381769.1- TTGGATTCAGCCCTCATGGAG  
SRR517000.103614309.2+ TTGGATTCAGCCCTCATGGAG  
SRR517000.39251131.1+ TTGGATTCAGCCCTCATGGAG  
SRR517004.58862282.1+ TTGGATTCAGCCCTCATGGAG  
SRR511911.51765582.1+ TTGGATTCAGCCCTCAAGGAGA  
SRR516973.16005217.1- TTGGATTCAGCCCTCATGGAGA  
SRR516983.41490614.2- TTGGATTCAGCCCTCATGGAGA  
SRR516983.54306814.2- TTGGATTCAGCCCTCATGGAGA  
SRR516992.23178703.2- TTGGATTCAGCCCTCATGGAGA  
SRR516993.12312704.1- TTGGATTCAGCCCTCATGGAGA  
SRR516993.73082870.1- TTGGATTCAGCCCTCATGGAGA  
SRR516996.88424796.2- TTTGAGTCAGCCCTCATGGAGA  
SRR517000.81566989.1+ TTGGATTCAGCCCTCATGGAGA  
SRR511892.6007403.1- TTGGATTCAGCCCTCATGGAGAG  
SRR516967.55179281.2+ TTGGATTCAGCCCTCATGGAGAG  
SRR516967.63778390.2- TTGGATTCAGCCCTCATGGAGAG  
SRR516972.49653018.2- TTGGATTCAGCCCTCATGGAGAG  
SRR516993.83887266.1+ TTGGATTCAGCCCTCATGGAGAG  
SRR516999.81087074.2+ TTGGATTCAGCCCTCATGGAGAG  
SRR516968.75435688.1- TTGGATTCAGCCCTCATGGAGAGT  
SRR516996.1617304.1+ TTGGATTCAGCCCTCATGGAGAGT  
SRR516998.43983662.1- TTGGATTCAGCCCTCATGGAGAGT  
SRR517001.43347006.1- TTGGATTCAGCCCTCATGGAGAGT  
SRR511912.63185812.1+ TTGGATTCAGCCCTCATGGAGAGTT  
SRR516990.32569854.2- TTGGATTCAGCCCTCATGGAGAGTT  
SRR516990.55302390.2- TTGGATTCAGCCCTCATGGAGAGTT  
SRR516993.75065526.2+ TTTGATTCAGCCCTCATGGAGAGTT  
SRR516996.29500035.2- TTGGATTCAGCCCTCATGGAGAGTT  
SRR516999.96819542.2- TTGGATTCAGCCCTCATGGAGAGTT  
SRR516989.36153179.1+ TTGGATTCAGCCCTCATGGAGAGTTG  
SRR516999.48060851.1- TTGGATTCAGCCCTCATGGAGAGTTG  
SRR517000.9053207.1- TTGGATTCAGCCCTCATGGAGAGTTG  
SRR517001.26562166.2- TTGGATTCAGCCCTCATGGAGAGTTG  
SRR517002.51438896.1- TTGGATTCAGCCCTCATGGAGAGTTG  
SRR516990.20970250.1+ TTGGATTCAGCCCTCATGGAGAGTTGC  
SRR511915.12934870.2- TTGGATTCAGCCCTCATGGAGAGTTGCC  
SRR516968.73747636.1- TTGGATTCAGCCCTCATGGAGAGTTGCC  
SRR516974.21816576.2- TTGGATTCAGCCCTCATGGAGAGTTGCC  
SRR517004.45940969.1+ TTGGATTCAGCCCTCATGGAGAGTTGCC  
SRR511892.63390781.2- TTGGATTCAGCCCTCATGGAGAGTTGCC  
SRR511892.64175574.2- TTGGATTCAGCCCTCATGGAGAGTTGCC  
SRR516967.59477310.1- TTGGATTCAGCCCTCATGGAGAGTTGCC  
SRR516977.49992915.2- TTGGATTCAGCCCTCATGGAGAGTTGCC  
SRR516978.65078285.1- TTGGATTCAGCCCTCATGGAGAGTTGCC  
SRR517009.51801045.2+ TTGGATTCAGCCCTCATGGAGAGTTGCC  
SRR517009.70794059.2+ TTGGATTCAGCCCTCATGGAGAGTTGCC  
SRR517009.89416108.1+ TTGGATTCAGCCCTCATGGAGAGTTGCC  
SRR516980.30549936.1- TTGGATTCAGCCCTCATGGAGAGTTGCC  
SRR516981.70866488.1- TTGGATTCAGCCCTCATGGAGAGTTGCC  
SRR516984.6819096.2- TTGGATTCAGCCCTCATGGAGAGTTGCC  
SRR516990.21735027.2- TTGGATTCAGCCCTCATGGAGAGTTGCC  
SRR516995.15167538.1+ TTGGATTCAGCCCTCATGGAGAGTTGCC  
SRR516999.15040710.1- TTGGATTCAGCCCTCATGGAGAGTTGCC  
SRR517002.62107602.1- TTGGATTCAGCCCTCATGGAGAGTTGCC  
SRR517002.80851214.2- TTGGATTCAGCCCTCATGGAGAGTTGCC  
SRR517005.17700561.1- TTGGATTCAGCCCTCATGGAGAGTTGCC  
SRR517009.2225310.1- TTGGATTCAGCCCTCATGGAGAGTTGCC  
SRR511911.36873194.1- TTGGATTCAGCCCTCATGGAGAGTTGCC  
SRR511914.80423043.1- TTGGATTCAGCCCTCATGGAGAGTTGCC  
SRR516967.132651451.1- TTGGATTCAGCCCTCATGGAGAGTTGCC

SRR516967.94039320.1- TTGGATTCAGCCCTCATGGAGAGTTGCCTGG  
SRR516968.137574947.2+ TTGGATTCAGCCCTCATGGAGAGTTGCCTGG  
SRR516981.62232392.2+ TTGGATTCAGCCCTCATGGAGAGTTGACTGG  
SRR516988.35895455.2+ TTGGATTCAGCCCTCATGGAGAGTTGCCTGG  
SRR516999.67197738.1- TTGGATTCAGCCCTCATGGAGAGTTGCCTGG  
SRR511892.9511611.2+ TTGGATTCAGCCCTCATGGCGAGTTGGCCGGA  
SRR516968.58859238.1+ TTGGATTCAGCCCTCATGGAGAGTTGCCTGGA  
SRR516994.53221266.2+ TTGGATTCAGCCCTCATGGAGAGTTGCCTGGA  
SRR516998.31606571.1+ TTGGATTCAGCCCTCATGGAGAGTTGCCTGGA  
SRR517003.51023813.2- TTGGATTCAGCCCTCATGGAGAGTTGCCTGGA  
SRR517005.8503673.2+ TTTGATTCAGCCCTCCTGGTGGAGTTGCCTTGA  
SRR511911.21547512.2- TTGGATTCAGCCCTCATGGAGAGTTGCCTGGAT  
SRR511913.18165035.2- TTGGATTCAGCCCTCATGGAGAGTTGCCTGGAT  
SRR511913.52308827.1- TTGGATTCAGCCCTCATGGAGAGTTGCCTGGAT  
SRR516978.52566920.2- TTGGATTCAGCCCTCATGGAGAGTTGCCTGGAT  
SRR516979.65960194.2- TTGGATTCAGCCCTCATGGAGAGTTGCCTGGAT  
SRR516992.40366624.2- TTGGATTCAGCCCTCATGGAGAGTTGCCTGGAT  
SRR516992.67474202.2+ TTGGATTCAGCCCTCATGGAGAGTTGCCTGGAT  
SRR516992.79411570.1- TTGGATTCAGCCCTCATGGAGAGTTGCCTGGAT  
SRR516994.6814432.2+ TTGGATTCAGCCCTCATGGAGAGTTGCCTGGAT  
SRR516998.45967480.1- TTGGATTCAGCCCTCATGGAGAGTTGCCTGGAT  
SRR517001.81299431.1+ TTGGATTCAGCCCTCATGGAGAGTTGCCTGGAT  
SRR511911.19148709.2+ TTGGATTCAGCCCTCATGGAGAGTTGCCTGGATC  
SRR511912.70385865.1- TTGGATTCAGCCCTCATGGAGAGTTGCCTGGATC  
SRR516968.156018396.1- TTGGATTCAGCCCTCATGGAGAGTTGCCTGGATC  
SRR516981.21374378.2- TTGGATTCAGCCCTCATGGAGAGTTGCCTGGATC  
SRR516993.5077793.2+ TTGGATTCAGCCCTCATGGAGAGTTGCCTGGATC  
SRR516996.75662898.1- TTGGATTCAGCCCTCATGGAGAGTTGCCTGGATC  
SRR517004.41051761.2+ TTGGATTCAGCCCTCATGGAGAGTTGCCTGGATC  
SRR517005.46088960.1- TTGGATTCAGCCCTCATGGAGAGTTGCCTGGATC  
SRR517009.48171529.2- TTGGATTCAGCCCTCATGGAGAGTTGCCTGGATC  
SRR511892.23600637.2+ TTGGATTCAGCCCTCATGGAGAGTTGCCCGGATCT  
SRR511911.3389924.2+ TTGGATTCAGCCCTCATGGAGAGTTGCCTGGATCT  
SRR511920.37463379.1- TTGGATTCAGCCCTCATGGAGAGTTGCCTGGATCT  
SRR516984.53836077.1- TTGGATTCAGCCCTCATGGAGAGTTGCCTGGATCT  
SRR516988.7333166.1- TTGGATTCAGCCCTCATGGAGAGTTGCCTGGATCT  
SRR516994.20458023.1+ TTGGATTCAGCCCTCATGGAGAGTTGCCTGGATCT  
SRR516996.49779749.1+ TTGGATTCAGCCCTCATGGAGAGTTGCCTGGATCT  
SRR517008.68021994.2- TTGGATTCAGCCCTCATGGAGAGTTGCCTGGATCT  
SRR511913.70154375.2- TTGGATTCAGCCCTCATGGAGAGTTGCCCTGGATCTG  
SRR516967.96216344.1+ TTGGATTCAGCCCTCATGGAGAGTTGCCCTGGATCTG  
SRR516978.37914558.1+ TTGGATTCAGCCCTCATGGAGAGTTGCCCTGGATCTG  
SRR516981.46321294.2+ TTGGATTCAGCCCTCATGGAGAGTTGCCCTGGATCTG  
SRR516989.64914875.2- TTGGATTCAGCCCTCATGGAGAGTTGCCCTGGATCTG  
SRR516996.32218127.1- TTGGATTCAGCCCTCATGGAGAGTTGCCCTGGATCTG  
SRR516998.88636739.2+ TTGGATTCAGCCCTCATGGAGAGTTGCCCTGGATCTG  
SRR517006.17938695.2+ TTGGATTCAGCCCTCATGGAGAGTTGCCCTGGATCTG  
SRR511914.24386047.1+ TTGGATTCAGCCCTCATGGAGAGTTGCCCGGATCTGA  
SRR511920.29932217.1- TTGGATTCAGCCCTCATGGAGAGTTGCCCTGGATCTGA  
SRR511920.31903781.1- TTGGATTCAGCCCTCATGGAGAGTTGCCCTGGATCTGA  
SRR511920.34826249.1- TTGGATTCAGCCCTCATGGAGAGTTGCCCTGGATCTGA  
SRR511920.43179619.1- TTGGATTCAGCCCTCATGGAGAGTTGCCCTGGATCTGA  
SRR511920.45487406.1- TTGGATTCAGCCCTCATGGAGAGTTGCCCTGGATCTGA  
SRR511920.5304296.1- TTGGATTCAGCCCTCATGGAGAGTTGCCCTGGATCTGA  
SRR511920.5304424.1- TTGGATTCAGCCCTCATGGAGAGTTGCCCTGGATCTGA  
SRR511920.9569649.1- TTGGATTCAGCCCTCATGGAGAGTTGCCCTGGATCTGA  
SRR516978.14954997.2+ TTGGATTCAGCCCTCATGGAGAGTTGCCCTGGATCTGA  
SRR516979.9712358.1- TTGGATTCAGCCCTCATGGAGAGTTGCCCTGGATCTGA  
SRR516986.23230956.2+ TTGGATTCAGCCCTCCTGGAGAGTTGCCCTGGATCTGA  
SRR516987.33930642.2+ TTGGATTCAGCCCTCATGGAGAGTTGCCCTGGATCTGA  
SRR516988.52138870.2+ TTGGATTCAGCCCTCATGGAGAGTTGCCCTGGATCTGA  
SRR516994.75814175.2+ TTGGATTCAGCCCTCATGGAGAGTTGCCCTGGATCTGA  
SRR516998.62923474.1+ TTGGATTCAGCCCTCATGGAGAGTTGCCCTGGATCTGA  
SRR517001.80318310.2- TTGGATTCAGCCCTCATGGAGAGTTGCCCTGGATCTGA  
SRR511917.16171770.1+ TTGGATTCAGCCCTCATGGAGAGTTGCCCTGGATCTGAC  
SRR511917.72085621.2+ TTGGATTCAGCCCTCATGGAGAGTTGCCCTGGATCTGAC  
SRR516972.34696103.2+ TTGGATTCAGCCCTCATGGAGAGTTGCCCTGGATCTGAC  
SRR516975.38025761.2- TTGGATTCAGCCCTCATGGAGAGTTGCCCTGGATCTGAC  
SRR516977.40786703.2- TTGGATTCAGCCCTCATGGAGAGTTGCCCTGGATCTGAC  
SRR516977.56138604.2- TTGGATTCAGCCCTCATGGAGAGTTGCCCTGGATCTGAC  
SRR516988.23560143.1+ TTGGATTCAGCCCTCATGGAGAGTTGCCCTGGATCTGAC  
SRR517003.83174067.1+ TTGGATTCAGCCCTCATGGAGAGTTGCCCTGGATCTGAC  
SRR517004.25798813.1+ TTGGATTCAGCCCTCATGGAGAGTTGCCCTGGATCTGAC  
SRR511916.27790353.2+ TTGGATTCAGCCCTCATGGAGAGTTGCCCTGGATCTGACA  
SRR511916.51501273.2+ TTGGATTCAGCCCTCATGGAGAGTTGCCCTGGATCTGACA  
SRR516972.32806802.1- TTGGATTCAGCCCTCATGGAGAGTTGCCCTGGATCTGACA  
SRR516975.13713707.1- TTGGATTCAGCCCTCATGGAGAGTTGCCCTGGATCTGACA  
SRR516975.31280279.1- TTGGATTCAGCCCTCATGGAGAGTTGCCCTGGATCTGACA  
SRR517000.18261147.1+ TTGGATTCAGCCCTCATGGAGAGTTGCCCTGGATCTGACA  
SRR517004.4165455.2+ TTGGATTCAGCCCTCATGGAGAGTTGCCCTGGATCTGACA  
SRR517007.15671468.2+ TTGGATTCAGCCCTCATGGAGAGTTGCCCTGGATCTGACA  
SRR517008.29824779.2- TTGGATTCAGCCCTCATGGAGAGTTGCCCTGGATCTGACA  
SRR511892.45271449.2+ TTGGATTCAGCCCTCATGGAGAGTTGCCCTGGATCTGACAT  
SRR511911.58123630.1+ TTGGATTCAGCCCTCATGGAGAGTTGCCCTGGATCTGACAT

SRR511916.34471369.1- TTGGATTCAGCCCTCATGGAGAGTTGCCTGGATCTGACAT  
SRR511916.47771346.2- TTGGATTCAGCCCTCATGGAGAGTTGCCTGGATCTGACAT  
SRR516969.1006309.2- TTGGATTCAGCCCTCATGGAGAGTTGCCTGGATCTGACAT  
SRR516978.384904.2- TTGGATTCAGCCCTCATGGAGAGTTGCCTGGATCTGACAT  
SRR516978.56562036.1+ TTGGATTCAGCCCTCATGGAGAGTTGCCTGGATCTGACAT  
SRR516993.8072866.1- TTGGATTCAGCCCTCATGGAGAGTTGCCTGGATCTGACAT  
SRR517009.71698028.2- TTGGATTCAGCCCTCATGGAGAGTTGCCTGGATCTGACAT  
SRR511912.13524230.1+ TTGGATTCAGCCCTCATGGAGAGTTGCCTGGATCTGACCTT  
SRR516967.81487147.2+ TTGGATTCAGCCCTCATGGAGAGTTGCCTGGATCTGACATT  
SRR516970.29220836.2- TTGGATTCAGCCCTCATGGAGAGTTGCCTGGATCTGACATT  
SRR516970.30280066.2- TTGGATTCAGCCCTCATGGAGAGTTGCCTGGATCTGACATT  
SRR516984.6644703.2- TTGGATTCAGCCCTCATGGAGAGTTGCCTGGATCTGACATT  
SRR516988.41673661.2- TTGGATTCAGCCCTCATGGAGAGTTGCCTGGATCTGACATT  
SRR516993.23735352.1- TTGGATTCAGCCCTCATGGAGAGTTGCCTGGATCTGACATT  
SRR516998.74208434.1- TTGGATTCAGCCCTCATGGAGAGTTGCCTGGATCTGACATT  
SRR517000.56225435.1- TTGGATTCAGCCCTCATGGAGAGTTGCCTGGATCTGACATT  
SRR517007.43638454.1- TTGGATTCAGCCCTCATGGAGAGTTGCCTGGATCTGACATT  
SRR517009.35713352.2- TTGGATTCAGCCCTCATGGAGAGTTGCCTGGATCTGACATT  
SRR517009.87547697.2- TTGGATTCAGCCCTCATGTAGAGTTGCCTGGATCTAACATT  
SRR516980.72482160.1- TTGGATTCAGCCCTCATGGAGAGTTGCCTGGATCTGACATTG  
SRR517000.54956038.1- TTGGATTCAGCCCTCATGGAGAGTTGCCTGGATCTGACATTG  
SRR511915.64989562.1- TTGGATTCAGCCCTCATGGAGAGTTGCCTGGATCTGACATTGT  
SRR511915.64989699.1- TTGGATTCAGCCCTCATGGAGAGTTGCCTGGATCTGACATTGT  
SRR516972.35896448.1- TTGGATTCAGCCCTCATGGAGAGTTGCCTGGATCTGACATTGT  
SRR516972.36494147.2+ TTGGATTCAGCCCTCCTGGAGAGTTGCCTGGATCTGACATTGT  
SRR516980.58810552.1- TTGGATTCAGCCCTCATGGAGAGTTGCCTGGATCTGACATTGT  
SRR516992.78415230.2- TTGGATTCAGCCCTCATGGAGAGTTGCCTGGATCTGACATTGT  
SRR516997.48515103.2- TTGGATTCAGCCCTCATGGAGAGTTGCCTGGATCTGACATTGT  
SRR511892.9368196.1+ TTGGATTCAGCCCTCATGGAGAGTTGCCTGGATCTGACATTGTG  
SRR511911.54079531.2+ TTGGATTCAGCCCTCATGGAGGGTGCCTGGATCTGACATTGTG  
SRR516967.5677042.1- TTGGATTCAGCCCTCATGGAGAGTTGCCTGGATCTGACATTGTG  
SRR516970.7484751.2+ TTGGATTCAGCCCTCATGGAGCGTGCCTGGATCTGCCATTGTG  
SRR516981.20078478.1- TTGGATTCAGCCCTCATGGAGAGTTGCCTGGATCTGACATTGTG  
SRR516998.86192854.2+ TTGGATTCAGCCCTCATGGAGAGTTGCCTGGATCTGACATTGTG  
SRR516999.49626087.2- TTGGATTCAGCCCTCATGGAGAGTTGCCTGGATCTGACATTGTG  
SRR516972.47863115.2- TTGGATTCAGCCCTCATGGAGAGTTGCCTGGATCTGACATTGTGA  
SRR516979.58015851.1+ TTGGATTCAGCCCTCATGGAGAGTTGCCTGGATCTGACATTGTGA  
SRR516996.92350992.2- TTGGATTCAGCCCTCATGGAGAGTTGCCTGGATCTGACATTGTGA  
SRR516997.86440148.2+ TTGGATTCAGCCCTCATGGAGAGTTGCCTGGATCTGACATTGTGA  
SRR517008.51758338.2+ TTGGATTCAGCCCTCATGGAGAGTTGCCTGGATCTGACATTGTGA  
SRR517008.6483545.2- TTGGATTCAGCCCTCATGGAGAGTTGCCTGGATCTGACATTGTGA  
SRR517009.11972102.1+ TTGGATTCAGCCCTCATGGAGAGTTGCCTGGATCTGACATTGTGAT  
SRR511916.10289327.1+ TTGGATTCAGCCCTCATGGAGAGTTGCCTGGATCTGACATTGTGAT  
SRR516969.9561270.1- TTGGATTCAGCCCTCATGGAGAGTTGCCTGGATCTGACATTGTGAT  
SRR516978.72874464.2- TTGGATTCAGCCCTCATGGAGAGTTGCCTGGATCTGACATTGTGAT  
SRR516995.23487131.1- TTGGATTCAGCCCTCATGGAGAGTTGCCTGGATCTGACATTGTGAT  
SRR516997.34496168.2- TTGGATTCAGCCCTCATGGAGAGTTGCCTGGATCTGACATTGTGAT  
SRR516997.92391410.2- TTGGATTCAGCCCTCATGGAGAGTTGCCTGGATCTGACATTGTGAT  
SRR511911.1070600.2+ TTGGATTCAGCCCTCATGGAGAGTTGCCTGGATCTGACCTTGTGATA  
SRR511914.6072833.2- TTGGATTCAGCCCTCATGGAGAGTTGCCTGGACCTGACATTGTGATA  
SRR511915.27615657.2+ TTGGATTCAGCCCTCATGGAGAGTTGCCTGGATCTGACATTGTGATA  
SRR516968.123158278.1+ TTGGATTCAGCCCTCATGGAGAGTTGCCTGGATCTGACATTGTGATA  
SRR516998.87299695.1- TTGGATTCAGCCCTCATGGAGAGTTGCCTGGATCTGACATTGTGATA  
SRR517000.7065464.1+ TTGGATTCAGCCCTCATGGAGAGTTGCCCGGATCTGACATTGTGATA  
SRR517009.108104.1+ TTGGATTCAGCCCTCATGGAGAGTTGCCCTGGATCTGACATTGTGATA  
SRR511913.40896479.2+ TTGGATTCAGCCCTCATGGAGAGTTGCCTGGATCTGACATTGTGATAG  
SRR511916.25675370.2+ TTGGATTCAGCCCTCATGGAGAGTTGCCTGGATCTGACATTGTGATAG  
SRR516991.44574167.1+ TTGGATTCAGCCCTCATGGAGAGTTGCCTGGATCTGACATTGTGATAG  
SRR516994.41842983.2- TTGGATTCAGCCCTCATGGAGAGTTGCCTGGATCTGACATTGTGATAG  
SRR517001.32246971.1- TTGGATTCAGCCCTCATGGAGAGTTGCCTGGATCTGACATTGTGATAG  
SRR517008.32872042.2- TTGGATTCAGCCCTCATGGAGAGTTGCCTGGATCTGACATTGTGATAG  
SRR517009.48718939.2- TTGGATTCAGCCCTCATGGAGAGTTGCCTGGATCTGACATTGTGATAG  
SRR517009.54064618.2- TTGGATTCAGCCCTCATGGAGAGTTGCCCTGGATCTGACATTGTGATAG  
SRR511914.11127656.1- TTGGATTCAGCCCTCATGGAGAGTTGCCTGGATCTGACATTGTGATAGG  
SRR511914.34655921.2- TTGGATTCAGCCCTCATGGAGAGTTGCCTGGATCTGACATTGTGATAGG  
SRR511914.59836345.2+ TTGGATTCAGCCCTCAGGGGGAGTTGCCTGGATCTGACATTGGGATAGG  
SRR516981.35980793.1+ TTGGATTCAGCCCTCATGGAGAGTTGCCCTGGATCTGACATTGTGATAGG  
SRR516984.19133805.1- TTGGATTCAGCCCTCATGGAGAGTTGCCTGGATCTGACATTGTGATAGG  
SRR516991.47909941.1+ TTGGATTCAGCCCTCATGGAGAGTTGCCTGGATCTGACATTGTGATAGG  
SRR516993.16481734.2- TTGGATTCAGCCCTCATGGAGAGTTGCCTGGATCTGACATTGTGATAGG  
SRR516994.49842132.2- TTGGATTCAGCCCTCATGGAGAGTTGCCTGGATCTGACATTGTGATAGG  
SRR516996.28202039.2- TTGGATTCAGCCCTCATGGAGAGTTGCCTGGATCTGACATTGTGATAGG  
SRR516996.72151079.1+ TTGGATTCAGCCCTCATGGAGAGTTGCCTGGATCTGACATTGTGATAGG  
SRR517000.7876007.1- TTGGATTCAGCCCTCATGGAGAGTTGCCTGGATCTGATATTGTGATAGG  
SRR517000.81693984.2- TTGGATTCAGCCCTCATGGAGAGTTGCCCTGGATCTGACATTGTGATAGG  
SRR517003.58518606.1+ TTGGATTCAGCCCTCATGGAGAGTTGCCTGGATCTGACATTGTGATAGG  
SRR517007.19456209.1- TTGGATTCAGCCCTCATGGAGAGTTGCCTGGATCTGACATTGTGATAGG  
SRR516978.26253784.2- TTGGATTCAGCCCTCATGGAGAGTTGCCTGGATCTGACATTGTGATAGGA  
SRR516978.39130629.2+ TTGGATTCAGCCCTCATGGAGAGTTGCCCTGGATCTGACATTGTGATAGGA  
SRR516981.13235658.1- TTGGATTCAGCCCTCATGGAGAGTTGCCTGGATCTGACATTGTGATAGGA  
SRR516995.47487143.1+ TTGGATTCAGCCCTCATGGAGAGTTGCCTGGATCTGACATTGTGATAGGG  
SRR517004.20569530.2- TTGGATTCAGCCCTCATGGAGAGTTGCCTGGATCTGACATTGTGATAGGA  
SRR517001.24362772.2+ TTGGATTCAGCCCTCATGGAGAGTTGCCTGGATCTGACATTGTGATAGGAA  
SRR517003.41478862.1+ TTGGATTCAGCCCTCATGGAGAGTTGCCTGGATCTGACATTGTGATAGGAA

SRR511892.42564732.2- TTGGATTCAGCCCTCATGGAGAGTTGCCTGGATCTGACATTGTGATAGGAAG  
SRR511892.56496978.1- TTGGATTCAGCCCTCATGGAGAGTTGCCTGGATCTGACATTGTGATAGGAAG  
SRR511915.30654048.2+ TTGGATTCAGCCCTCATGGAGAGTTGCCTGGATCTGACATTGTGATAGGAAG  
SRR516975.66584327.2- TTGGATTCAGCCCTCATGGAGAGTTGCCTGGATCTGACATTGTGATAGGAAG  
SRR516986.29707316.1+ TTGGATTCAGCCCTCATGGAGAGTTGCCTGGATCTGACATTGTGATAGGAGG  
SRR516996.68386100.2+ TTGGATTCAGCCCTCATGGAGAGTTGCCTGGATCTGACATTGTGATAGGAAG  
SRR516996.755157.2- TTGGATTCAGCCCTCATGGAGAGTTGCCTGGATCTGACATTGTGATAGGAAG  
SRR516998.784538.2- TTGGATTCAGCCCTCATGGAGAGTTGCCTGGATCTGACATTGTGATAGGAAG  
SRR517001.70847586.2- TTGGATTCAGCCCTCATGGAGAGTTGCCTGGATCTGACATTGTGATAGGAGG  
SRR511892.53446249.1- TTGGATTCAGCCCTCATGGAGAGTTGCCTGGATCTGACATTGTGATAGGAAGT  
SRR516972.46208961.2- TTGGATTCAGCCCTCATGGAGAGTTGCCTGGATCTGACATTGTGATAGGAAGT  
SRR516974.27143600.1+ TTGGATTCAGCCCTCATGGAGAGTTGCCTGGATCTGACATTGTGATAGGAAGT  
SRR516980.15802379.2- TTGGATTCAGCCCTCATGGAGAGTTGCCTGGATCTGACATTGTGATAGGAGGT  
SRR516983.52981551.1+ TTGGATTCAGCCCTCATGGAGAGTTGCCTGGATCTGACATTGTGATAGGAAGG  
SRR516997.7493563.2- TTGGATTCAGCCCTCATGGAGAGTTGCCTGGATCTGACATTGTGATAGGAAGT  
SRR511892.22200889.2- TTGGATTCAGCCCTCATGGAGAGTTGCCTGGATCTGACATTGTGATAGGAAGTA  
SRR511915.74307710.2- TTGGATTCAGCCCTCATGGAGAGTTGCCTGGATCTGACATTGTGATAGGAAGTA  
SRR516974.54645088.1- TTGGATTCAGCCCTCATGGAGAGTTGCCTGGATCTGACATTGTGATAGGAAGTA  
SRR516987.22815449.2- TTGGATTCAGCCCTCATGGAGAGTTGCCTGGATCTGACATTGTGATAGGAAGTA  
SRR517005.91348161.2- TTGGATTCAGCCCTCATGGAGAGTTGCCTGGATCTGACATTGTGATAGGAAGTA  
SRR516974.11239183.1+ TTGGATTCAGCCCTCATGGAGAGTTGCCTGGATCTGACATTGTGATAGGAAGGGT  
SRR516974.60730690.1- TTGGATTCAGCCCTCATGGAGAGTTGCCTGGATCTGACATTGTGATAGGAAGTGT  
SRR516983.52187946.1- TTGGATTCAGCCCTCATGGAGAGTTGCCTGGATCTGACATTGTGATAGGAAGTGT  
SRR516994.13378760.2+ TTGGATTCAGCCCTCATGGAGAGTTGCCTGGATCTGACATTGTGATAGGAAGTGT  
SRR516995.89724041.1+ TTGGATTCAGCCCTCATGGAGAGTTGCCTGGATCTGACATTGTGATAGGAAGTGT  
SRR517000.35171247.1- TTGGATTCAGCCCTCATGGAGAGTTGCCTGGATCTGACATTGTGATAGGAAGTGT  
SRR511892.6619238.1+ TTGGATTCAGCCCTCATGGAGAGTTGCCTGGATCTGACATTGTGATAGGAAGTATC  
SRR516994.57038585.2- TTGGATTCAGCCCTCATGGAGAGTTGCCTGGATCTGACATTGTGATAGGAAGTGT  
SRR517009.61399791.2+ TTGGATTCAGCCCTCATGGAGAGTTGCCTGGATCTGACATTGTGATAGGAAGGGTC  
SRR511914.8117859.1- TTGGATTCAGCCCTCATGGAGAGTTGCCTGGATCTGACATTGTGATAGGAAGTATCT  
SRR516968.147400290.1+ TTGGATTCAGCCCTCATGGAGAGTTGCCTGGATCTGACATTGTGATAGGAAGTGTCT  
SRR516979.61219488.2- TTGGATTCAGCCCTCATGGAGAGTTGCCTGGATCTGACATTGTGATAGGAAGTGTCT  
SRR516986.14380990.1- TTGGATTCAGCCCTCATGGAGAGTTGCCTGGATCTGACATTGTGATAGGAAGTGTCT  
SRR516995.62719574.1- TTGGATTCAGCCCTCATGGAGAGTTGCCTGGATCTGACATTGTGATAGGAAGTGTCT  
SRR516996.81711883.2- TTGGATTCAGCCCTCATGGAGAGTTGCCTGGATCTGACATTGTGATAGGAAGTGTCT  
SRR517006.14315108.1- TTGGATTCAGCCCTCATGGAGAGTTGCCTGGATCTGACATTGTGATAGGAAGTGTCT  
SRR511911.2865577.2+ TTGGATTCAGCCCTCATGGAGAGTTGCCTGGATCTGACATTGTGATAGGAAGTATCTT  
SRR516967.149674807.2- TTGGATTCAGCCCTCATGGAGAGTTGCCTGGATCTGACATTGTGATAGGAAGTATCTT  
SRR516975.20770772.2- TTGGATTCAGCCCTCATGGAGAGTTGCCTGGATCTGACATTGTGATAGGAAGTATCTT  
SRR516978.64514468.1+ TTGGATTCAGCCCTCATGGAGAGTTGCCTGGATCTGACATTGTGATAGGAAGTGTCTT  
SRR516986.47797799.1+ TTGGATTCAGCCCTCATGGAGAGTTGCCTGGATCTGACATTGTGATAGGAAGTGTCTT  
SRR517002.42093965.1- TTGGATTCAGCCCTCATGGAGAGTTGCCTGGATCTGACATTGTGATAGGAAGTATCTT  
SRR511892.12533835.1+ TTGGATTCAGCCCTCATGGAGAGTTGCCTGGATCTGACATTGTGATAGGAAGTATCTTC  
SRR516974.43488651.1+ TTGGATTCAGCCCTCATGGAGAGTTGCCTGGATCTGACATTGTGATAGGAAGTATCTTC  
SRR516979.57710857.2- TTGGATTCAGCCCTCATGGAGAGTTGCCTGGATCTGACATTGTGATAGGAAGTGTCTTC  
SRR517007.51673519.2- TTGGATTCAGCCCTCATGGAGAGTTGCCTGGATCTGACATTGTGATAGGAAGTATCTTC  
SRR517009.90312363.1- TTGGATTCAGCCCTCATGGAGAGTTGCCTGGATCTGACATTGTGATAGGAAGTGTCTTC  
SRR511892.4161180.1+ TTGGATTCAGCCCTCATGGAGAGTTGCCTGGATCTGACATTGTGATAGGAAGTATCTTC  
SRR511892.42669582.2+ TTGGATTCAGCCCTCATGGAGAGTTGCCTGGATCTGACATTGTGATAGGAAGTATCTTC  
SRR511892.54818066.1+ TTGGATTCAGCCCTCATGGAGAGTTGCCTGGATCTGACATTGTGATAGGAAGTATCTTC  
SRR511911.24730437.2+ TTGGATTCAGCCCTCATGGAGAGTTGCCTGGATCTGACATTGTGATAGGAAGTATCTTC  
SRR511911.51765602.2- TTGGATTCAGCCCTCATGGAGAGTTGCCTGGATCTGACATTGTGATAGGAAGTATCTTC  
SRR511911.56187465.1+ TTGGATTCAGCCCTCATGGAGAGTTGCCTGGATCTGACATTGTGATAGGAAGTATCTTC  
SRR511911.59626526.2+ TTGGATTCAGCCCTCATGGAGAGTTGCCTGGATCTGACATTGTGATAGGAAGTATCTTC  
SRR511911.74696838.2+ TTGGATTCAGCCCTCATGGAGAGTTGCCTGGATCTGACATTGTGATAGGAAGTATCTTC  
SRR511912.1303277.1- TTGGATTCAGCCCTCATGGAGAGTTGCCTGGATCTGACATTGTGATAGGAAGTATCTTC  
SRR511912.18837352.1+ TTGGATTCAGCCCTCATGGAGAGTTGCCTGGATCTGACATTGTGATAGGAAGTATCTTC  
SRR511912.43892789.1- TTGGATTCAGCCCTCATGGAGAGTTGCCTGGATCTGACATTGTGATAGGAAGTATCTTC  
SRR511913.2846960.2+ TTGGATTCAGCCCTCATGGAGAGTTGCCTGGATCTGACATTGTGGTAGGAAGTATCTTC  
SRR511913.35897653.2+ TTGGATTCAGCCCTCATGGAGAGTTGCCTGGATCTGACATTGTGATAGGAAGTATCTTC  
SRR511913.43839483.2+ TTGGATTCAGCCCTCATGGAGAGTTGCCTGGATCTGACATTGTGATAGGAAGTATCTTC  
SRR511913.46504761.2- TTGGATTCAGCCCTCATGGAGAGTTGCCTGGATCTGACATTGTGATAGGAAGTATCTTC  
SRR511913.69503215.1+ TTGGATTCAGCCCTCATGGAGAGTTGCCTGGATCTGACATTGTGATAGGAAGTATCTTC  
SRR511914.12156601.2- TTGGATTCAGCCCTCATGGAGAGTTGCCTGGATCTGACATTGTGATAGGAAGTATCTTC  
SRR511914.15324340.2+ TTGGATTCAGCCCTCATGGAGAGTTGCCTGGATCTGACATTGTGATAGGAAGTATCTTC  
SRR511914.15324684.2+ TTGGATTCAGCCCTCATGGAGAGTTGCCTGGATCTGACATTGTGATAGGAAGTATCTTC  
SRR511914.6591292.2+ TTGGATTCAGCCCTCATGGAGAGTTGCCTGGATCTGACATTGTGATAGGAAGTATCTTC  
SRR511914.80114329.2+ TTGGATTCAGCCCTCATGGAGAGTTGCCTGGATCTGACATTGTGATAGGAAGTATCTTC  
SRR511914.85321226.1+ TTGGATTCAGCCCTCATGGAGAGTTGCCTGGATCTGACATTGTGATAGGAAGTATCTTC  
SRR511914.85321569.1+ TTGGATTCAGCCCTCATGGAGAGTTGCCTGGATCTGACATTGTGATAGGAAGTATCTTC  
SRR511914.86222658.1- TTGGATTCAGCCCTCATGGAGAGTTGCCTGGATCTGACATTGTGATAGGAAGTATCTTC  
SRR511915.28490755.2- TTGGATTCAGCCCTCATGGAGAGTTGCCTGGATCTGACATTGTGATAGGAAGTATCTTC  
SRR511915.2930610.2- TTGGATTCAGCCCTCATGGAGAGTTGCCTGGATCTGACATTGTGATAGGAAGTATCTTC  
SRR511915.30731583.2- TTGGATTCAGCCCTCATGGAGAGTTGCCTGGATCTGACATTGTGATAGGAAGTATCTTC  
SRR511915.30731584.2- TTGGATTCAGCCCTCATGGAGAGTTGCCTGGATCTGACATTGTGATAGGAAGTATCTTC  
SRR511915.43325895.2+ TTGGATTCAGCCCTCATGGAGAGTTGCCTGGATCTGACATTGTGATAGGAAGTATCTTC  
SRR511915.60393449.2- TTGGATTCAGCCCTCATGGAGAGTTGCCTGGATCTGACATTGTGATAGGAAGTATCTTC  
SRR516967.103239374.2+ TTGGATTCAGCCCTCATGGAGAGTTGCCTGGATCTGACATTGTGATAGGAAGTGTCTTC  
SRR516967.114035844.2- TTGGATTCAGCCCTCATGGAGAGTTGCCTGGATCTGACATTGTGATAGGAAGTATCTTCA  
SRR516967.128996446.1- TTGGATTCAGCCCTCATGGAGAGTTGCCTGGATCTGACATTGTGATAGGAAGTGTCTTC  
SRR516967.140688955.2- TTGGATTCAGCCCTCATGGAGAGTTGCCTGGATCTGACATTGTGATAGGAAGTATCTTC  
SRR516967.30072848.2+ TTGGATTCAGCCCTCATGGAGAGTTGCCTGGATCTGACATTGTGATAGGAAGTATCTTC  
SRR516967.3323960.2- TTGGATTCAGCCCTCATGGAGAGTTGCCTGGATCTGACATTGTGATAGGAAGTGTCTTC  
SRR516967.3860522.1- TTGGATTCAGCCCTCATGGAGAGTTGCCTGGATCTGACATTGTGATAGGAAGTATCTTC

SRR516967.44398778.2+ TTGGATTCAGCCCTCATGGAGAGTTGCCTGGATCTGACATTGTGATAGGAAGTGTCTTCC  
SRR516967.51922488.2- TTGGATTCAGCCCTCATGGAGAGTTGCCTGGATCTGACATTGTGATAGGAAGTATCTTCC  
SRR516967.62165391.1- TTGGATTCAGCCCTCATGGAGAGTTGCCTGGATCTGACATTGTGATAGGAAGTATCTTCC  
SRR516968.118272353.1- TTGGATTCAGCCCTCATGGAGAGTTGCCTGGATCTGACATTGTGATAGGAAGTGTCTTCC  
SRR516968.128087344.2- TTGGATTCAGCCCTCATGGAGAGTTGCCTGGATCTGACATTGTGATAGGAAGTGTCTTCC  
SRR516968.163565941.2+ TTGGATTCAGCCCTCATGGAGAGTTGCCTGGATCTGACATTGTGATAGGAAGTGTCTTCC  
SRR516968.21564094.2- TTGGATTCAGCCCTCATGGAGAGTTGCCTGGATCTGACATTGTGATAGGAAGTGTCTTCC  
SRR516968.33193255.1+ TTGGATTCAGCCCTCATGGAGAGTTGCCTGGATCTGACATTGTGATAGGAAGTGTCTTCC  
SRR516968.39167129.1+ TTGGATTCAGCCCTCATGGAGAGTTGCCTGGATCTGACATTGTGATAGGAAGTGTCTTCC  
SRR516968.96419618.1- TTGGATTCAGCCCTCATGGAGAGTTGCCTGGATCTGACATTGTGATAGGAAGTGTCTTCC  
SRR516969.23432456.1+ TTGGATTCAGCCCTCATGGAGAGTTGCCTGGATCTGACATTGTGATAGGAAGTGTCTTCC  
SRR516969.35394539.2- GTGGATTCAGCCACATAGAGAGTTGCCTGGATCTGACATTGTGATAGGAAGTGGCTTCC  
SRR516971.18513477.2- TTGGATTCAGCCCTCATGGAGAGTTGCCTGGATCTGACATTGTGATAGGAAGTGTCTTCC  
SRR516971.28756462.1+ TTGGATTCAGCCCTCATGGAGAGTTGCCTGGATCTGACATTGTGATAGGAAGTGTCTTCC  
SRR516971.34870911.2+ TTGGATTCAGCCCTCATGGAGAGTTGCCTGGATCTGACATTGTGATAGGAAGTGTCTTCC  
SRR516972.30272084.2- TTGGATTCAGCCCTCATGGAGAGTTGCCTGGATCTGACATTGTGATAGGAAGTGTCTTCC  
SRR516972.83556354.1+ TTGGATTCAGCCCTCATGGAGAGTTGCCTGGATCTGACATTGTGATAGGAAGTGTCTTCC  
SRR516973.40895713.2- TTGGATTCAGCCCTCATGGAGAGTTGCCTGGATCTGACATTGTGATAGGAAGTGTCTTCC  
SRR516974.31202954.1+ TTGGATTCAGCCCTCATGGAGAGTTGCCTGGATCTGACATTGTGATAGGAAGTGTCTTCC  
SRR516974.33828349.1- TTGGATTCAGCCCTCATGGAGAGTTGCCTGGATCTGACATTGTGATAGGAAGTATCTTCC  
SRR516974.38378408.2- TTGGATTCAGCCCTCATGGAGAGTTGCCTGGATCTGACATTGTGATAGGAAGTATCTTCC  
SRR516974.40379406.1- TTGGATTCAGCCCTCATGGAGAGTTGCCTGGATCTGACATTGTGATAGGAAGTGTCTTCC  
SRR516974.4422789.2+ TTGGATTCAGCCCTCATGGAGAGTTGCCTGGATCTGACATTGTGATAGGAAGTATCTTCC  
SRR516974.45483276.1- TTGGATTCAGCCCTCATGGAGAGTTGCCTGGATCTGACATTGTGATAGGAAGTATCTTCC  
SRR516974.49320234.1- TTGGATTCAGCCCTCATGGAGAGTTGCCTGGATCTGACATTGTGATAGGAAGTGTCTTCC  
SRR516974.54553033.2+ TTGGATTCAGCCCTCATGGAGAGTTGCCTGGATCTGACATTGTGATAGGAAGTGTCTTCC  
SRR516974.72219416.1- TTGGATTCAGCCCTCATGGAGAGTTGCCTGGATCTGACATTGTGATAGGAAGTGTCTTCC  
SRR516975.56296657.1- TTGGATTCAGCCCTCATGGAGAGTTGCCTGGATCTGACATTGTGATAGGAAGTATCTTCC  
SRR516977.10847396.1+ TTGGATTCAGCCCTCATGGAGAGTTGCCTGGATCTGACATTGTGATAGGAAGTGTCTTCC  
SRR516977.12873538.2- TTGGATTCAGCCCTCATGGAGAGTTGCCTGGATCTGACATTGTGATAGGAAGTGTCTTCC  
SRR516977.16216859.1+ TTGGATTCAGCCCTCATGGAGAGTTGCCTGGATCTGACATTGTGATAGGAAGTGTCTTCC  
SRR516977.43459967.2+ TTGGATTCAGCCCTCATGGAGAGTTGCCTGGATCTGACATTGTGATAGGAAGTGTCTTCC  
SRR516977.5387374.2+ TTGGATTCAGCCCTCATGGAGAGTTGCCTGGATCTGACATTGTGATAGGAAGTGTCTTCC  
SRR516977.80260583.2- TTGGATTCAGCCCTCATGGAGAGTTGCCTGGATCTGACATTGTGATAGGAAGTGTCTTCC  
SRR516978.15412507.1+ TTGGATTCAGCCCTCATGGAGAGTTGCCTGGATCTGACATTGTGATAGGAAGTGTCTTCC  
SRR516978.26037079.1+ TTGGATTCAGCCCTCATGGAGAGTTGCCTGGATCTGACATTGTGATAGGAAGTGTCTTCC  
SRR516978.31035699.2+ TTGGATTCAGCCCTCATGGAGAGTTGCCTGGATCTGACATTGTGATAGGAAGTGTCTTCC  
SRR516978.39183046.2+ TTGGATTCAGCCCTCATGGAGAGTTGCCTGGATCTGACATTGTGATAGGAAGTGTCTTCC  
SRR516978.43155707.2+ TTGGATTCAGCCCTCATGGAGAGTTGCCTGGATCTGACATTGTGATAGGAAGTGTCTTCC  
SRR516978.58338306.2+ TTGGATTCAGCCCTCATGGAGAGTTGCCTGGATCTGACATTGTGATAGGAAGTGTCTTCC  
SRR516979.52325428.1- TTGGATTCAGCCCTCATGGAGAGTTGCCTGGATCTGACATTGTGATAGGAAGTGTCTTCC  
SRR516980.15856106.1- TTGGATTCAGCCCTCATGGAGAGTTGCCTGGATCTGACATTGTGATAGGAAGTGTCTTCC  
SRR516980.23012010.2+ TTGGATTCAGCCCTCATGGAGAGTTGCCTGGATCTGACATTGTGATAGGAAGTGTCTTCC  
SRR516980.51880329.2- TTGGATTCAGCCCTCATGGAGAGTTGCCTGGATCTGACATTGTGATAGGAAGTGTCTTCC  
SRR516980.61023510.2+ TTGGATTCAGCCCTCATGGAGAGTTGCCTGGATCTGACATTGTGATAGGAAGTGTCTTCC  
SRR516981.10390610.2- TTGGATTCAGCCCTCATGGAGAGTTGCCTGGATCTGACATTGTGATAGGAAGTGTCTTCC  
SRR516981.37172809.1- TTGGATTCAGCCCTCATGGAGAGTTGCCTGGATCTGACATTGTGATAGGAAGTGTCTTCC  
SRR516981.62187975.2- TTGGATTCAGCCCTCATGGAGAGTTGCCTGGATCTGACATTGTGATAGGAAGTGTCTTCC  
SRR516981.72937619.1- TTGGATTCAGCCCTCATGGAGAGTTGCCTGGATCTGACATTGTGATAGGAAGTGTCTTCC  
SRR516981.75185944.1- TTGGATTCAGCCCTCATGGAGAGTTGCCTGGATCTGACATTGTGATAGGAAGTGTCTTCC  
SRR516981.79962474.1+ TTGGATTCAGCCCTCATGGAGAGTTGCCTGGATCTGACATTGTGATAGGAAGTATCTTCC  
SRR516983.29420342.1- TTGGATTCAGCCCTCATGGAGAGTTGCCTGGATCTGACATTGTGATAGGAAGTATCTTCC  
SRR516983.39104642.2+ TTGGATTCAGCCCTCATGGAGAGTTGCCTGGATCTGACATTGTGATAGGAAGTATCTTCC  
SRR516983.72843190.1- TTGGATTCAGCCCTCATGGAGAGTTGCCTGGATCTGACATTGTGATAGGAAGTGTCTTCC  
SRR516984.43825566.1- TTGGATTCAGCCCTCATGGAGAGTTGCCTGGATCTGACATTGTGATAGGAAGTATCTTCC  
SRR516984.67730810.2- TTGGATTCAGCCCTCATGGAGAGTTGCCTGGATCTGACATTGTGATAGGAAGTATCTTCC  
SRR516984.80897040.1- TTGGATTCAGCCCTCATGGAGAGTTGCCTGGATCTGACATTGTGATAGGAAGTATCTTCC  
SRR516984.88862730.1- TTGGATTCAGCCCTCATGGAGAGTTGCCTGGATCTGACATTGTGATAGGAAGTGTCTTCC  
SRR516986.38251531.2- TTGGATTCAGCCCTCATGGAGAGTTGCCTGGATCTGACATTGTGATAGGAAGTGTCTTCC  
SRR516986.43082651.2- TTGGATTCAGCCCTCATGGAGAGTTGCCTGGATCTGACATTGTGATAGGAAGTGTCTTCC  
SRR516986.47463977.1- TTGGATTCAGCCCTCATGGAGAGTTGCCTGGATCTGACATTGTGATAGGAAGTGTCTTCC  
SRR516986.5284326.1- TTGGATTCAGCCCTCATGGAGAGTTGCCTGGATCTGACATTGTGATAGGAAGTGTCTTCC  
SRR516986.62178078.2+ TTGGATTCAGCCCTCATGGAGAGTTGCCTGGATCTGACATTGTGATAGGAAGTGTCTTCC  
SRR516987.72954228.2- TTGGATTCAGCCCTCATGGAGAGTTGCCTGGATCTGACATTGTGATAGGAAGTATCTTCC  
SRR516988.25345425.2+ TTGGATTCAGCCCTCATGGAGAGTTGCCTGGATCTGACATTGTGATAGGAAGTGTCTTCC  
SRR516988.49719328.1- TTGGATTCAGCCCTCATGGAGAGTTGCCTGGATCTGACATTGTGATAGGAAGTGTCTTCC  
SRR516989.23071515.2- TTGGATTCAGCCCTCATGGAGAGTTGCCTGGATCTGACATTGTGATAGGAAGTGTCTTCC  
SRR516989.53465710.1- TTGGATTCAGCCCTCATGGAGAGTTGCCTGGATCTGACATTGTGATAGGAAGTGTCTTCC  
SRR516989.74819632.1- TTGGATTCAGCCCTCATGGAGAGTTGCCTGGATCTGACATTGTGATAGGAAGTGTCTTCC  
SRR516989.82467866.2- TTGGATTCAGCCCTCATGGAGAGTTGCCTGGATCTGACATTGTGATAGGAAGTGTCTTCC  
SRR516990.33601261.1- TTGGATTCAGCCCTCATGGAGAGTTGCCTGGATCTGACATTGTGATAGGAAGTGTCTTCC  
SRR516990.47204932.2+ TTGGATTCAGCCCTCATGGAGAGTTGCCTGGATCTGACATTGTGATAGGAAGTGTCTTCC  
SRR516990.60531713.1- TTGGATTCAGCCCTCATGGAGAGTTGCCTGGATCTGACATTGTGATAGGAAGTGTCTTCC  
SRR516991.23448506.1+ TTGGATTCAGCCCTCATGGAGAGTTGCCTGGATCTGACATTGTGATAGGAAGTGTCTTCC  
SRR516991.46156534.1- TTGGATTCAGCCCTCATGGAGAGTTGCCTGGATCTGACATTGTGATAGGAAGTGTCTTCC  
SRR516991.78056440.1- TTGGATTCAGCCCTCATGGAGAGTTGCCTGGATCTGACATTGTGATAGGAAGTGTCTTCC  
SRR516991.91013899.2+ TTGGATTCAGCCCTCATGGAGAGTTGCCTGGATCTGACATTGTGATAGGAAGTGTCTTCC  
SRR516992.15393409.1- TTGGATTCAGCCCTCATGGAGAGTTGCCTGGATCTGACATTGTGATAGGAAGTGTCTTCC  
SRR516992.45921129.1+ TTGGATTCAGCCCTCATGGAGAGTTGCCTGGATCTGACATTGTGATAGGAAGTGTCTTCC  
SRR516992.55475284.2+ TTGGATTCAGCCCTCATGGAGAGTTGCCTGGATCTGACATTGTGATAGGAAGTGTCTTCC  
SRR516992.6010329.1- TTGGATTCAGCCCTCATGGAGAGTTGCCTGGATCTGACATTGTGATAGGAAGTATCTTCC  
SRR516993.2915184.1+ TTGGATTCAGCCCTCATGGAGAGTTGCCTGGATCTGACATTGTGATAGGAAGTGTCTTCC  
SRR516993.35093586.1+ TTGGATTCAGCCCTCATGGAGAGTTGCCTGGATCTGACATTGTGATAGGAAGTGTCTTCC  
SRR516993.472471.2+ TTGGATTCAGCCCTCATGGAGAGTTGCCTGGATCTGACATTGTGATAGGAAGTGTCTTCC



SRR516993.65644538.2+ TTGGATTCAGCCCTCATGGAGAGTTGCCTGGATCTGACATTGTGATAGGAAGTGTCTTCC  
SRR516994.3610095.1+ TTGGATTCAGCCCTCATGGAGAGTTGCCTGGATCTGACATTGTGATAGGAGGTGTCTTCC  
SRR516994.39206055.2- TTGGATTCAGCCCTCATGGAGAGTTGCCTGTATCTGACATTGTGATAGGAGGTGTCTTCC  
SRR516994.44481978.2- TTGGATTCAGCCCTCATGGAGAGTTGCCTGGATCTGACATTGTGATAGGAGGTGTCTTCC  
SRR516994.49855553.1+ TTGGATTCAGCCCTCATGGAGAGTTGCCTGGATCTGACATTGGGATAGGAGGTGTCTTCC  
SRR516994.52852729.1+ TTGGATTCAGCCCTCATGGAGAGTTGCCTGGATCTGACATTGTGATAGGAGGTGTCTTCC  
SRR516994.77692468.2+ TTGGATTCAGCCCTCATGGAGAGTTGCCTGGATCTGACATTGTGATAGGAGGTGTCTTCC  
SRR516994.81814726.1- TTGGATTCAGCCCTCATGGAGAGTTGCCTGGATCTGACATTGTGATAGGAGGTGTCTTCC  
SRR516995.22467748.1+ TTGGATTCAGCCCTCATGGAGAGTTGCCTGGATCTGACATTGTGATAGGAAGTGTCTTCC  
SRR516995.33739366.2- TTGGATTCAGCCCTCATGGAGAGTTGCCTGGATCTGACATTGTGATAGGAAGTGTCTTCC  
SRR516995.50404448.2- TTGGATTCAGCCCTCATGGAGAGTTGCCTGGACCTGACATTGTGATAGGAAGTGTCTTCC  
SRR516995.52974433.1+ TTGGATTCAGCCCTCATGGAGAGTTGCCTGGATCTGACATTGTGATAGGAAGTGTCTTCC  
SRR516995.53678391.1+ TTGGATTCAGCCCTCATGGAGAGTTGCCTGGATCTGACATTGTGATAGGAGGTGTCTTCC  
SRR516995.56989024.1+ TTGGATTCAGCCCTCATGGAGAGTTGCCTGGATCTGACATTGTGATAGGAGGTGTCTTCC  
SRR516995.66321276.1+ TTGGATTCAGCCCTCATGGAGAGTTGCCTGGATCTGACATTGTGATAGGAAGTGTCTTCC  
SRR516995.928256.2+ TTGGATTCAGCCCTCACGGAGAGTTGCCTGGATCTGACATTGTGATAGGAAGTGTCTTCC  
SRR516996.23482257.1- TTGGATTCAGCCCTCATGGAGAGTTGCCTGGATCTGACATTGTGATAGGAAGTGTCTTCC  
SRR516996.34976669.1+ TTGGATTCAGCCCTCATGGAGAGTTGCCTGGATCTGACATTGTGATAGGAAGTGTCTTCC  
SRR516996.85062640.1- TTGGATTCAGCCCTCATGGAGAGTTGCCTGGATCTCACATTGTGATAGGAAGTGTCTTCC  
SRR516996.87236229.2+ TTGGATTCAGCCCTCATGGAGAGTTGCCTGGTCTGACATTGTGATAGGAAAAGTCTTCC  
SRR516996.92591042.1+ TTGGATTCAGCCCTCATGGAGAGTTGCCTGGATCTGACATTGTGATAGGAAGTGTCTTCC  
SRR516997.42706554.2- TTGGATTCAGCCCTCATGGAGAGTTGCCTGGATCTGACATTGTGATAGGAAGTGTCTTCC  
SRR516997.97876806.2- TTGGATTCAGCCCTCATGGAGAGTTGCCTGGATCTGACATTGTGATAGGAAGTGTCTTCC  
SRR516998.105584836.2- TTGGATTCAGCCCTCATGGAGAGTTGCCTGGATCTGACATTGTGATAGGAAGTGTCTTCC  
SRR516998.105713546.1- TTGGATTCAGCCCTCATGGAGAGTTGCCTGGATCTGACATTGTGATAGGAAGTGTCTTCC  
SRR516998.42387076.2- TTGGATTCAGCCCTCATGGAGAGTTGCCTGGATCTGACATTGTGATAGGAAGTGTCTTCC  
SRR516998.45234491.1- TTGGATTCAGCCCTCATGGAGAGTTGCCTGGATCTGACATTGTGATAGGAAGTGTCTTCC  
SRR516998.65740325.1+ TTGGATTCAGCCCTCATGGAGAGTTGCCTGGATCTGACATTGTGATAGGAAGTGTCTTCC  
SRR516998.74008326.1+ TTGGATTCAGCCCTCATGGAGAGTTGCCTGGATCTGACATTGTGATAGGAAGTGTCTTCC  
SRR516998.74633545.1+ TTGGATTCAGCCCTCATGGAGAGTTGCCTGGATCTGACATTGTGATAGGAAGTGTCTTCC  
SRR516998.90024593.2- TTGGATTCAGCCCTCATGGAGAGTTGCCTGGATCTGACATTGTGATAGGAAGTGTCTTCC  
SRR516999.103891959.2- TTGGATTCAGCCCTCAGGAGAGTTGCCTGGATCTGACATTGTGATAGGAAGTGTCTTCC  
SRR516999.108053227.2- TTGGATTCAGCCCTCATGGAGAGTTGCCTGGATCTGACATTGTGATAGGAAGTGTCTTCC  
SRR516999.38071679.1- TTGGATTCAGCCCTCATGGAGAGTTGCCTGGATCTGACATTGTGATAGGAAGTGTCTTCC  
SRR516999.51761.1+ TTGGATTCAGCCCTCATGGAGAGTTGCCTGGATCTGACATTGTGATAGGAAGTGTCTTCC  
SRR516999.52117285.1+ TTGGATTCAGCCCTCATGGAGAGTTGCCTGGATCTGACATTGTGATAGGAAGTGTCTTCC  
SRR516999.9724330.1- TTGGATTCAGCCCTCATGGAGAGTTGCCTGGATCTGACATTGTGATAGGAAGTGTCTTCC  
SRR517000.104217922.1- TTGGATTCAGCCCTCATGGAGAGTTGCCTGGATCTGACATTGTGATAGGAAGTGTCTTCC  
SRR517000.36416800.1+ TTGGATTCAGCCCTCATGGAGAGTTGCCTGGATCTGACATTGTGATAGGAGGTGTCTTCC  
SRR517000.52358860.1+ TTGGATTCAGCCCTCATGGAGAGTTGCCTGGATCTGACATTGTGATAGGAGGTGTCTTCC  
SRR517001.2955954.2+ TTGGATTCAGCCCTCATGGAGAGTTGCCTGGATCTGACATTGTGATAGGAGGTGTCTTCC  
SRR517001.4174199.1+ TTGGATTCAGCCCTCATGGAGAGTTGCCTGGATCTGACATTGTGATAGGAGGTGTCTTCC  
SRR517001.53006899.2- TTGGATTCAGCCCTCATGGAGAGTTGCCTGGATCTGACATTGTGATAGGAGGTGTCTTCC  
SRR517002.24413856.1- TTGGATTCAGCCCTCATGGAGAGTTGCCTGGATCTGACATTGTGATAGGAAGTGTCTTCC  
SRR517002.45348.1+ TTGGATTCAGCCCTCATGGAGAGTTGCCTGGATCTGACATTGTGATAGGAAGTGTCTTCC  
SRR517002.77942367.2- TTGGATTCAGCCCTCATGGAGAGTTGCCTGGATCTGACATTGTGATAGGAAGTGTCTTCC  
SRR517002.88618213.1+ TTGGATTCAGCCCTCATGGAGAGTTGCCTGGATCTGACATTGTGATAGGAAGTGTCTTCC  
SRR517002.88668875.2- TTGGATTCAGCCCTCATGGAGAGTTGCCTGGATCTGACATTGTGATAGGAAGTGTCTTCC  
SRR517002.98887947.1- TTGGATTCAGCCCTCATGGAGAGTTGCCTGGATCTGACATTGTGATAGGAAGTGTCTTCC  
SRR517003.18297409.2- TTGGATTCAGCCCTCATGGAGAGTTGCCTGGATCTGACATTGTGATAGGAGGTGTCTTCC  
SRR517003.19490054.2- TTGGATTCAGCCCTCATGGAGAGTTGCCTGGATCTGACATTGTGATAGGAGGTGTCTTCC  
SRR517003.41980170.1- TTGGATTCAGCCCTCATGGAGAGTTGCCTGGATCTGACATTGTGATAGGAAGTGTCTTCC  
SRR517003.61889052.2+ TTGGATTCAGCCCTCATGGAGAGTTGCCTGGATCTGACATTGTGATAGGAAGTGTCTTCC  
SRR517003.70211691.2- TTGGATTCAGCCCTCATGGAGAGTTGCCTGGATCTGACATTGTGATAGGAGGTGTCTTCC  
SRR517003.75889442.2+ TTGGATTCAGCCCTCATGGAGAGTTGCCTGGATCTGACATTGTGATAGGAGGTGTCTTCC  
SRR517004.35890882.2+ TTGGATTCAGCCCTCATGGAGAGTTGCCTGGATCTGACATTGTGATAGGAAGTGTCTTCC  
SRR517005.58912099.2+ TTGGATTCAGCCCTCATGGAGAGTTGCCTGGATCTGACATTGTGATAGGAAGTGTCTTCC  
SRR517005.61088972.2+ TTGGATTCAGCCCTCATGGAGAGTTGCCTGGATCTGACATTGTGATAGGAAGTGTCTTCC  
SRR517005.8220247.2- TTGGATTCAGCCCTCATGGAGAGTTGCCTGGATCTGACATTGTGATAGGAGGTGTCTTCC  
SRR517005.97174151.1- TTGGATTCAGCCCTCATGGAGAGTTGCCTGGATCTGACATTGTGATAGGAGGTGTCTTCC  
SRR517005.99236075.2- TTGGATTCAGCCCTAATGGAGAGTTGCCTGGATCTGACATTGTGATAGGAAGTGTCTTCC  
SRR517006.19437322.1- TTGGATTCAGCCCTCATGGAGAGTTGCCTGGATCTGACATTGTGATAGGAAGTGTCTTCC  
SRR517007.4303113.2+ TTGGATTCAGCCCTCATGGAGAGTTGCCTGGATCTGACATTGTGATAGGAAGTGTCTTCC  
SRR517007.626055.1- TTGGATTCAGCCCTCATGGAGAGTTGCCTGGATCTGACATTGTGATAGGAAGTGTCTTCC  
SRR517008.44606589.1- TTGGATTCAGCCCTCATGGAGAGTTGCCTGGATCTGACATTGTGATAGGAGGTGTCTTCC  
SRR517008.65933108.2- TTGGATTCAGCCCTCATGGAGAGTTGCCTGGATCTGACATTGTGATAGGAGGTGTCTTCC  
SRR517008.68337962.1- TTGGATTCAGCCCTCATGGAGAGTTGCCTGGATCTGACATTGTGATAGGAGGTGTCTTCC  
SRR517008.68826874.2- TTGGATTCAGCCCTCATGGAGAGTTGCCTGGATCTGACATTGTGATAGGAGGTGTCTTCC  
SRR517008.69459447.1+ TTGGATTCAGCCCTCATGGAGAGTTGCCTGGATCTGACATTGTGATAGGAGGTGTCTTCC  
SRR517008.87918252.2- TTGGATTCAGCCCTCATGGAGAGTTGCCTGGATCTGACATTGTGATAGGAGGTGTCTTCC  
SRR517008.9761471.2+ TTGGATTCAGCCCTCATGGAGAGTTGCCTGGATCTGACATTGTGATAGGAGGTGTCTTCC  
SRR517009.35173062.1- TTGGATTCAGCCCTCATGGAGAGTTGCCTGGATCTGACATTGTGATAGGAGGTGTCTTCC  
SRR517009.36170965.2+ TTGGATTCAGCCCTCATGGAGAGTTGCCTGGATCTGACATTGTGATAGGAAGTGTCTTCC  
SRR517009.40589595.1- TTGGATTCAGCCCTCATGGAGAGTTGCCTGGATCTGACATTGTGATAGGAAGTGTCTTCC  
SRR517009.46333.1+ TTGGATTCAGCCCTCATGGAGAGTTGCCTGGATCTGACATTGTGATAGGAGGTGTCTTCC  
SRR517009.47953341.2+ TTGGATTCAGCCCTCATGGAGAGTTGCCTGGATCTGACATTGTGATAGGAGGTGTCTTCC  
SRR517009.59440565.2- TTGGATTCAGCCCTCATGGAGAGTTGCCTGGATCTGACATTGTGATAGGAAGTGTCTTCC  
SRR517009.79220826.2- TTGGATTCAGCCCTCATGGAGAGTTGCCTGGATCTGACATTGTGATAGGAGGTGTCTTCC  
SRR517009.90290402.2+ TTGGATTCAGCCCTCATGGAGAGTTGCCTGGATCTGACATTGTGATAGGAGGTGTCTTCC  
SRR511892.9511611.1- TGGATTCAGCCCTCAGGAGAGTTGCCTGGATCTGACATTGTGATAGGAAGTGTCTTCC  
SRR516977.113781662.2- TGGATTCAGCCCTCATGGAGAGTTGCCTGGATCTGACATTGTGATAGGAAGTGTCTTCC  
SRR516974.49170123.2- TGGATTCAGCCCTCATGGAGAGTTGCCTGGATCTGACATTGTGATAGGAAGTGTCTTCC  
SRR516981.9101608.1+ TGGATTCAGCCCTCATGGAGAGTTGCCTGGATCTGACATTGTGATAGGAAGTGTCTTCC  
SRR516988.44614705.1- TGGATTCAGCCCTCATGGAGAGTTGCCTGGATCTGACATTGTGATAGGAGGTGTCTTCC











|                       |     |
|-----------------------|-----|
| SRR516995.28796839.1- | TCC |
| SRR516999.2638208.1-  | TCC |
| SRR517008.38355138.1- | TCC |
| SRR517009.21340928.1+ | TCC |
| SRR511911.74696838.1- | CC  |
| SRR511915.16586476.2+ | CC  |
| SRR516967.72187734.2- | CC  |
| SRR516968.39655396.1- | CC  |
| SRR516969.1886920.1+  | CC  |
| SRR516971.10454062.1- | CC  |
| SRR516978.16880897.2+ | CC  |
| SRR517002.33929122.2+ | CC  |
| SRR516967.692820.2-   | C   |
| SRR516968.54367312.1- | C   |
| SRR516980.28746069.1- | C   |
| SRR516998.29101479.1- | C   |
| SRR516998.94356641.1+ | C   |

consensus

TTGGATTAGCCCTCATGGAGAGTTGCCTGGATCTGACATTGTGATAGGAAGTGTCTTCC

|                        |             |
|------------------------|-------------|
| SRR516967.103239374.2+ | C           |
| SRR516967.128996446.1- | C           |
| SRR516967.62165391.1-  | C           |
| SRR516971.18513477.2-  | C           |
| SRR516994.44481978.2-  | C           |
| SRR516994.49855553.1+  | C           |
| SRR516994.77692468.2+  | C           |
| SRR517004.35890882.2+  | C           |
| SRR516977.16216859.1+  | CC          |
| SRR516977.5387374.2+   | CC          |
| SRR516986.38251531.2-  | CC          |
| SRR516996.23482257.1-  | CC          |
| SRR516998.42387076.2-  | CC          |
| SRR511892.4161180.1+   | CCA         |
| SRR511915.28490755.2-  | CCA         |
| SRR516972.30272084.2-  | CCA         |
| SRR516991.78056440.1-  | CCA         |
| SRR511913.46504761.2-  | CCAA        |
| SRR516972.83556354.1+  | CCAA        |
| SRR516981.75185944.1-  | CCAA        |
| SRR516983.72843190.1-  | CCAA        |
| SRR516984.67730810.2-  | CCAA        |
| SRR516989.82467866.2-  | CCAA        |
| SRR516991.46156534.1-  | CCAA        |
| SRR511892.54818066.1+  | CCAAT       |
| SRR516987.72954228.2-  | CCAAT       |
| SRR516994.81814726.1-  | CCAAT       |
| SRR516996.87236229.2+  | CCAAT       |
| SRR517002.88618213.1+  | ACAAT       |
| SRR517003.19490054.2-  | CCAAT       |
| SRR517008.87918252.2-  | CCAAT       |
| SRR511915.2930610.2-   | CCAATG      |
| SRR516971.28756462.1+  | CCAATG      |
| SRR516978.58338306.2+  | CCAATG      |
| SRR517000.104217922.1- | CCAATG      |
| SRR517002.77942367.2-  | CCAATG      |
| SRR517008.65933108.2-  | CCAATG      |
| SRR511914.6591292.2+   | CCCATGG     |
| SRR516974.4422789.2+   | CCAATGG     |
| SRR516974.54553033.2+  | CCAATGG     |
| SRR516978.26037079.1+  | CCCATGG     |
| SRR516978.39183046.2+  | CCAATGG     |
| SRR516992.6010329.1-   | CCAATGG     |
| SRR516995.52974433.1+  | CCAATGG     |
| SRR511914.85321226.1+  | CCAATGGC    |
| SRR511914.85321569.1+  | CCAATGGC    |
| SRR516988.25345425.2+  | CCAATGGC    |
| SRR516995.66321276.1+  | CCAATGGC    |
| SRR517008.9761471.2+   | CCAATGGC    |
| SRR517009.35173062.1-  | CCAATGGC    |
| SRR517009.90290402.2+  | CCAATGGC    |
| SRR516969.35394539.2-  | CCAATGGCA   |
| SRR516984.88862730.1-  | CCAATGGCA   |
| SRR516989.23071515.2-  | CCAATGGCA   |
| SRR511892.42669582.2+  | CCAATGGCAG  |
| SRR511911.24730437.2+  | CCAATGGCAG  |
| SRR511912.18837352.1+  | CCAATGGCAG  |
| SRR511916.25522842.2-  | CCAATGGCAG  |
| SRR516994.52852729.1+  | CCAATGGCAG  |
| SRR511916.16741319.1-  | CCAATGGCAGC |
| SRR511916.60079524.1-  | CCAATGGCAGC |
| SRR516967.30072848.2+  | CCAATGGCAGC |
| SRR516990.47204932.2+  | CCAATGGCAGC |

SRR516991.23448506.1+ CCAATGGCAGG  
SRR517001.2955954.2+ CCAATGGCAGC  
SRR517005.97174151.1- CCAATGGCAGC  
SRR516967.44398778.2+ CCAATGGCAGCA  
SRR516986.5284326.1- CCAATGGCAGCA  
SRR516998.74633545.1+ CCAATGGCAGCA  
SRR516967.140688955.2- CCAATGGCAGCAT  
SRR516980.23012010.2+ CCAATAGCAGCAT  
SRR516980.51880329.2- CCAATGGCAGCAT  
SRR516990.60531713.1- CCAATGGCAGCAT  
SRR516996.92591042.1+ CCAATGGCAGCAT  
SRR516998.105713546.1- CCAATGGCAGCAT  
SRR516999.51761.1+ CCAATGGCAGCAT  
SRR517002.88668875.2- CCAATGGCAGCAT  
SRR517009.79220826.2- CCAATGGCAGCAT  
SRR516971.34870911.2+ CCAATGGCAGCATC  
SRR516981.10390610.2- CCAATGGCAGCATC  
SRR516996.34976669.1+ CCAATGGCAGCATC  
SRR511915.60393449.2- CCAATGGCAGCATCT  
SRR511916.5782551.2- CCAATGGCAGCATCT  
SRR516980.15856106.1- CCAATGGCAGCATCT  
SRR516986.47463977.1- CCAATGGCAGCATCT  
SRR516994.3610095.1+ CCAATGGCAGCATCT  
SRR517006.19437322.1- CCAATGGCAGCATCT  
SRR511913.2846960.2+ CCCATGGCAGGATCTA  
SRR516974.31202954.1+ CCAATGGCAGCATCTA  
SRR516989.53465710.1- CCAATGGCAGCATCTA  
SRR516992.55475284.2+ CCAATGGCAGCATCTA  
SRR516995.928256.2+ CCAATGGCAGCCTCTA  
SRR511913.69503215.1+ CCAATGGCAGCATCTAC  
SRR511918.18417571.2- CCAATGGCAGCATCTAC  
SRR516977.10847396.1+ CCAATGGCAGCCTCTAC  
SRR516992.45921129.1+ CCAATGGCAGCATCTAC  
SRR517003.18297409.2- CCAATGGCAGCATCTAC  
SRR517007.4303113.2+ CCAATGGCAGCATCTAC  
SRR511916.56327930.1+ CCAATGGCAGCATCTACT  
SRR511917.40254043.1+ CCAATGGCAGCATCTACT  
SRR516996.85062640.1- CCAATGGCAGCATCTACT  
SRR516998.105584836.2- CCAATGGCAGCATCTACT  
SRR516968.163565941.2+ CCAATGGCAGCATCTACTT  
SRR516983.39104642.2+ CCAATGGCAGCATCTACTT  
SRR516984.43825566.1- CCAATGGCAGCATCTACTT  
SRR516984.80897040.1- CCAATGGCAGCATCTACTT  
SRR516986.62178078.2+ CCAATGGCAGCATCTACTT  
SRR516993.2915184.1+ CCAATGGCAGCATCTACTT  
SRR516995.56989024.1+ CCAATGGCAGCATCTACTT  
SRR516998.45234491.1- CCAATGGCAGCATCTACTT  
SRR517000.52358860.1+ CCAATGGCAGCATCTACTT  
SRR517003.70211691.2- CCAATGGCAGCATCTACTT  
SRR516968.33193255.1+ CCAATGGCAGCATCTACTTC  
SRR516974.33828349.1- CCAATGGCAGCATCTACTTC  
SRR516974.38378408.2- CCAATGGCAGCATCTACTTC  
SRR516974.49320234.1- CCAATGGCAGCATCTACTTC  
SRR516981.62187975.2- CCAATGGCAGCATCTACTTC  
SRR516981.72937619.1- CCAATGGCAGCATCTACTTC  
SRR516988.49719328.1- CCAATGGCAGCATCTACTTC  
SRR516991.91013899.2+ CCAATGGCAGCATCTACTTC  
SRR517002.45348.1+ CCAATGGCAGCATCTACTTC  
SRR517003.75889442.2+ TCAATGGCAGCATCTACTTC  
SRR517005.58912099.2+ CCAATGGCAGCATCTACTTC  
SRR517005.61088972.2+ CCAATGGCAGCATCTACTTC  
SRR517008.44606589.1- CCAATGGCAGCATCTACTTC  
SRR517008.68337962.1- CCAATGGCAGCATCTACTTC  
SRR517008.69459447.1+ CCAATGGCAGCATCTACTTC  
SRR511913.43839483.2+ CCAATGGCAGCATCTACTTCT  
SRR511918.17146333.2+ CCAATGGCAGCATCTACTTCT  
SRR516995.50404448.2- CCAATGGCAGCATCTACTTCT  
SRR516998.74008326.1+ CCAATGGCAGCATCTACTTCT  
SRR516998.90024593.2- CCAATGGCAGCATCTACTTCT  
SRR511911.56187465.1+ CCAATGGCAGCATCTACTTCTC  
SRR516983.29420342.1- CCAATGGCAGCATCTACTTCTC  
SRR516997.42706554.2- CCAATGGCAGCATCTACTTCTC  
SRR516999.103891959.2- CCAATGGCAGCATCTACTTCTC  
SRR516999.9724330.1- CCAATGGCAGCATCTACTTCTC  
SRR517002.98887947.1- CCAATGGCAGCATCTACTTCTC  
SRR517005.99236075.2- CCAATGGCAGCATCTACTTCTC  
SRR517007.626055.1- CCAATGGCAGCATCTACTTCTC  
SRR511914.15324684.2+ CCAATGGCAGCATCTACTTCTCC  
SRR511916.35863368.2- CCAATGGCAGCATCTACTTCTCC  
SRR516981.37172809.1- CCAATGGCAGCATCTACTTCTCC  
SRR516990.33601261.1- CCAATGGCAGCATCTACTTCTCC  
SRR516995.33739366.2- CCAATGGCAGCATCTACTTCTCC  
SRR516998.65740325.1+ CCAATGGCAGCATCTACTTCTCC  
SRR517000.36416800.1+ CCAATGGCAGCATCTACTTCTCC



SRR511912.43892789.1- CCAATGGCAGCATCTACTTCTCCg  
SRR516978.15412507.1+ CCAATGGCAGCATCTACTTCTCCg  
SRR516992.15393409.1- CCAATGGCAGCATCTACTTCTCCg  
SRR516994.39206055.2- CCAATGGCAGCATCTACTTCTCCg  
SRR516997.97876806.2- CCAATGGCAGCATCTACTTCTCCg  
SRR516999.108053227.2- CCAATGGCAGCATCTACTTCTCCg  
SRR517002.24413856.1- CCAATGGCAGCATCTACTTCTCCg  
SRR517003.41980170.1- CCAATGGCAGCATCTACTTCTCCg  
SRR511914.15324340.2+ CCAATGGCAGCATCTACTTCTCCgt  
SRR516968.21564094.2- CCAATGGCAGCATCTACTTCTCCgt  
SRR516977.12873538.2- CCAATGGCAGCATCTACTTCTCCgt  
SRR516977.80260583.2- CCAATGGCAGCATCTACTTCTCCgt  
SRR516978.43155707.2+ CCAACGGCAGCCTCTACTTCTCCgt  
SRR516986.43082651.2- CCAATGGCAGCATCTACTTCTCCgt  
SRR516993.35093586.1+ CCAATGGCAGCATCTACTTCTCCgt  
SRR516993.65644538.2+ CCAATGGCAGCATCTACTTCTCCgt  
SRR516999.52117285.1+ CCAATGGCAGCATCTACTTCTCCgt  
SRR517001.53006899.2- CCAATGGCAGCATCTACTTCTCCgt  
SRR517009.40589595.1- CCAATGGCAGCATCTACTTCTCCgt  
SRR516973.40895713.2- CCAATGGCAGCATCTACTTCTCCgta  
SRR516978.31035699.2+ CCAATGGCAGCATCTACTTCTCCgtc  
SRR516995.53678391.1+ CCAATGGCAGCATCTACTTCTCCgta  
SRR517001.4174199.1+ CCAATGGCAGCATCTACTTCTCCgta  
SRR511911.74696838.2+ CCAATGGCAGCATCTACTTCTCCgtaa  
SRR516979.52325428.1- CCAATGGCAGCATCTACTTCTCCgtaa  
SRR516981.79962474.1+ CCAATGGCAGCATCTACTTCTCCgtaa  
SRR517003.61889052.2+ CCAATGGCAGCATCTACTTCTCCgtaa  
SRR517009.47953341.2+ CCAATGGCAGCATCTACTTCTCCgtaa  
SRR517009.59440565.2- CCAATGGCAGCATCTACTTCTCCgtaa  
SRR511912.1303277.1- CCAATGGCAGCATCTACTTCTCCgtaag  
SRR511915.30731583.2- CCAATGGCAGCATCTACTTCTCCgtaag  
SRR511915.30731584.2- CCAATGGCAGCATCTACTTCTCCgtaag  
SRR516989.74819632.1- CCAATGGCAGCATCTACTTCTCCgtaag  
SRR516999.38071679.1- CCAATGGCAGCATCTACTTCTCCgtaag  
SRR511915.35046284.2- CCAATGGCAGCATCTACTTCTCCgtaagt  
SRR516974.40379406.1- CCAATGGCAGCATCTACTTCTCCgtaagt  
SRR517005.8220247.2- CCAATGGCAGCATCTACTTCTCCgtaagt  
SRR511913.35897653.2+ CCAATGGCAGCATCTACTTCTCCgtgagtt  
SRR511914.80114329.2+ CCAATGGCAGCATCTACTTCTCCgtaagtt  
SRR511918.33642367.2+ CCAATGGCAGCATCTACTTCTCCgtaagtt  
SRR516968.96419618.1- CCAATGGCAGCATCTACTTCTCCgtaagtt  
SRR516969.23432456.1+ CCAATGGCAGCATCTACTTCTCCgtaagtt  
SRR516975.56296657.1- CCAATGGCAGCATCTACTTCTCCgtaagtt  
SRR516977.43459967.2+ CCAATGGCAGCATCTACTTCTCCgtaagtt  
SRR516995.22467748.1+ CCAATGGCAGCATCTACTTCTCCgtaagtt  
SRR517008.68826874.2- CCAATGGCAGCATCTACTTCTCCgtaagtt  
SRR516974.49170123.2- CCAATGGCAGCATCTACTTCTCCgtaagttg  
SRR516981.9101608.1+ CCAATGGCAGCATCTACTTCTCCgtaagttg  
SRR516988.44614705.1- CCAATGGCAGCATCTACTTCTCCgtaagttg  
SRR516996.21050103.2+ CCAATGGCAGCATCTACTTCTCCgtaagttg  
SRR516997.65362583.2+ CCAATGGCAGCATCTACTTCTCCgtaagttg  
SRR517002.7720294.2- CCAATGGCAGCATCTACTTCTCCgtaagttg  
SRR517003.32714941.1- CCAATGGCAGCATCTACTTCTCCgtaagttg  
SRR517003.71024107.1- CCAATGGCAGCATCTACTTCTCCgtaagttg  
SRR516992.35154680.2+ CCAATGGCAGCAACTAATTCTCCgtaagttga  
SRR516998.54949380.1+ CCAATGGCAGCATCTACTTCTCCgtaagttga  
SRR516999.4765606.2- CCAATGGCAGCATCTACTTCTCCgtaagttga  
SRR517006.28181699.2- CCAATGGCAGCATCTACTTCTCCgtaagttga  
SRR511914.86222658.1- CCAATGGCAGCATCTACTTCTCCgtaagttgaa  
SRR516972.13628751.2+ CCAATGGCAGCATCTACTTCTCCgtaagttgaa  
SRR516980.16802146.2- CCAATGGCAGCATCTACTTCTCCgtaagttgaa  
SRR516988.46830167.2- CCAATGGTAGCATCTACTTCTCCgtaagttgaa  
SRR516990.37851369.1+ CCAATGGCAGCATCTACTTCTCCgtaagttgaa  
SRR516995.55575214.2- CCAATGGCAGCATCTACTTCTCCgtaagttgaa  
SRR517003.40047671.2- CCAATGGCAGCATCTACTTCTCCgtaagttgaa  
SRR516968.128087344.2- CCAATGGCAGCATCTACTTCTCCgtaagttgaaa  
SRR516977.42799382.2+ CCAATGGCAGCATCTACTTCTCCgtaagttgaaa  
SRR516999.94573754.1+ CCAATGGCAGCATCTACTTCTCCgtaagttgaaa  
SRR517001.30441251.2+ CCAATGGCAGCATCTAATTCTCCgtaagttgaaa  
SRR516968.39167129.1+ CCAATGGCAGCATCTACTTCTCCgtaagttgaaaa  
SRR516996.2184957.1+ CCAATGGCAGCATCTACTTCTCCgtaagttgaaaa  
SRR516996.58664910.1- CCAATGGCAGCATCTACTTCTCCgtaagttgaaaa  
SRR517004.43077788.2+ CCAATGGCAGCATCTACTTCTCCgtaagttgaaaa  
SRR517009.74371807.2- CCAATGGCAGCATCTACTTCTCCgtaagttgaaaa  
SRR516967.3860522.1- CCAATGGCAGCATCTACTTCTCCgtaagttgaaaaag  
SRR516967.51922488.2- CCAATGGCAGCATCTACTTCTCCgtaagttgaaaaag  
SRR516996.70382886.1- CCAATGGCAGCATCTACTTCTCCgtaagttgaaaaag  
SRR517009.30109562.1- CCAATGGCAGCATCTACTTCTCCgtaagttgaaaaag  
SRR516967.3323960.2- CCAATGGCAGCATCTACTTCTCCgtaagttgaaaaaga  
SRR516977.29390676.2+ CCAATGGCAGCATCTACTTCTCCgtaagttgaaaaaga  
SRR516977.47398733.2- CCAATGGCAGCATCTACTTCTCCgtaagttgaaaaaga  
SRR516977.52908323.1- CCAATGGCAGCATCTACTTCTCCgtaagttgaaaaaga  
SRR516980.67663155.2- CCAATGGCAGCATCTACTTCTCCgtaagttgaaaaaga  
SRR516981.43550688.1+ CCAATGGCAGCATCTACTTCTCCgtaagttgaaaaaga

SRR516996.85687262.2- CCAATGGCAGCATCTACTTCTCCgtaagttgaaaaga  
SRR517000.69157843.1+ CCAATGGCAGCATCTACTTCTCCcctaagttgaaaaga  
SRR517000.8876587.2+ CCAATGGCAGCATCTACTTCTCCgtaagttgaaaaga  
SRR511911.59626526.2+ CCAATGGCAGCAACTACTTCTCCgtcagttgaaaagac  
SRR516977.59451244.1- CCAATGGCAGCATCTACTTCTCCgtaagttgaaaagac  
SRR516980.7478290.1- CCAATGGCAGCATCTACTTCTCCgtaagttgaaaagac  
SRR511911.51765582.2- CCAATGGCAGCATCTACTTCTCCgtaagttgaaaagact  
SRR511915.43325895.2+ CCAATGGCAGCATCTACTTCTCCgtaaggtgaaaagaat  
SRR516973.6568969.2- CCAATGGCAGCATCTACTTCTCCgtaagttgaaaagact  
SRR516987.61502473.1- CCAATGGCAGCATCTACTTCTCCctaagttgaaaagact  
SRR516997.11539523.2+ CCAATGGCAGCATCTACTTCTCCgtaagttgaaaagact  
SRR517000.77997273.2- CCAATGGCAGCATCTACTTCTCCgtaagttgaaaagact  
SRR517008.80303637.1+ CCAATGGCAGCATCTACTTCTCCgtaagttgaaaagact  
SRR516967.114035844.2- CCAATGGCAGCATCTACTTCTCCgtaagttgaaaagact  
SRR516972.19207856.2+ CCAATGGCAGCATCTACTTCTCCggaagttgaaaagact  
SRR516981.7950043.2+ CCAATGGCAGGAGACTACTTCTCCgtaaatgaaaacact  
SRR516990.7184572.1+ CCAATGGCAGCATCTACTTCTCCgtaagttgaaaagact  
SRR516996.11671795.2- CCAATGGCAGCATCTACTTCTCCgtaagttgaaaagact  
SRR516996.95894100.2- CCAATGGCAGCATCTACTTCTCCgtaagttgaaaagact  
SRR517001.80549406.1+ CCAATGGCAGCATCTACTTCTCCgtaagttgaaaagact  
SRR511892.9511611.1- CCAATGGCAGCATCTACTTCTCCgtaagttgaaaagact  
SRR516968.118272353.1- CCAATGGCAGCATCTACTTCTCCgtaagttgaaaagact  
SRR516981.84093782.2- CCAATGGCAGCATCTACTTCTCCgtaagttgaaaagact  
SRR516984.12082939.1- CCAATGGCAGCATCTACTTCTCCgtaagttgaaaagact  
SRR517006.50484772.1+ CCAATGGCAGCATCTACTTCTCCgtaagttgaaaagact  
SRR517009.11783183.2- CCAATGGCAGCTTCTACTTCTCCgtaagttgaaaagact  
SRR517009.48303164.2+ CCAATGGCAGCATCTACTTCTCCgtaagttgaaaagact  
SRR511911.60280636.1- CCAATGGCAGCATCTACTTCTCCgtaagttgaaaagact  
SRR511912.78910790.2- CCAATGGCAGCATCTACTTCTCCgtaagttgaaaagact  
SRR511914.67096997.1- CCAATGGCAGCATCTACTTCTCCgtaagttgaaaagact  
SRR516967.113781662.2- CCAATGGCAGCATCTACTTCTCCgtaagttgaaaagact  
SRR516974.60321821.2- CCAATGGCAGCATCTACTTCTCCgtaagttgaaaagact  
SRR516986.48107818.2- CCAATGGCAGCATCTACTTCTCCgtaagttgaaaagact  
SRR516989.87718993.2+ CCAATGGCAGCATCTACTTCTCCgtaagttgaaaagact  
SRR517001.78342098.1- CCAATGGCAGCATCTACTTCTCCgtaagttgaaaagact  
SRR511914.46576162.1- CCAATGGCAGCATCTACTTCTCCgtaagttgaaaagact  
SRR516969.15376651.1- CCAATGGCAGCATCTACTTCTCCgtaagttgaaaagact  
SRR516972.40740620.1+ CCAATGGCAGCATCTACTTCTCCgtaagttgaaaagact  
SRR516977.35615817.1- CCAATGGCAGCATCTACTTCTCCgtaagttgaaaagact  
SRR516980.28641220.2+ CCAATGGCAGCATCTACTTCTCCgtaagttgaaaagact  
SRR516984.39430615.2- CCAATGGCAGCATCTACTTCTCCgtaagttgaaaagact  
SRR516993.65564502.1+ CCAATGGCAGCATCTACTTCTCCgtaagttgaaaagact  
SRR516996.20396000.1- CCAATGGCAGCATCTACTTCTCCgtaagttgaaaagact  
SRR516997.6377760.1+ CCAATGGCAGCATCTACTTCTCCgtaagttgaaaagact  
SRR517004.25460609.1+ CCAATGGCAGCATCTACTTCTCCgtaagttgaaaagact  
SRR517004.25658369.2+ CCAATGGCAGGAACTACTTCTCCgtaagttgaaaagact  
SRR517008.70570764.1- CCAATGGCAGCATCTACTTCTCCgtaagttgaaaagact  
SRR517009.74175557.1- CCAATGGCAGCATCTACTTCTCCgtaagttgaaaagact  
SRR511917.2258772.2- CCAATGGCAGCATCTACTTCTCCgtaagttgaaaagact  
SRR516968.169513645.2+ CCAATGGCAGCATCTACTTCTCCgtaagttgaaaagact  
SRR516969.27833237.2- CCAATGGCAGCATCTACTTCTCCgtaagttgaaaagact  
SRR516976.66377853.2+ CCAATGGCAGCCTCCACTTCTCCgtaagttgaaaagact  
SRR516978.31082004.1+ CCAATGGCAGCATCTACTTCTCCgtaagttgaaaagact  
SRR516984.29026302.1- CCAATGGCAGCATCTACTTCTCCgtaagttgaaaagact  
SRR516986.21336065.1- CCAATGGCAGCATCTACTTCTCCgtaagttgaaaagact  
SRR516989.43576713.1- CCAATGGCAGCATCTACTTCTCCgtaagttgaaaagact  
SRR516981.80205710.2- CCAATGGCAGCATCTACTTCTCCgtaagttgaaaagact  
SRR516983.7594697.1- CCAATGGCAGCATCTACTTCTCCgtaagttgaaaagact  
SRR516986.54469150.2- CCAATGGCAGCATCTACTTCTCCgtaagttgaaaagact  
SRR516996.47351341.1- CCAATGGCAGCATCTACTTCTCCgtaagttgaaaagact  
SRR517000.74370214.2- CCAATGGCAGCATCTACTTCTCCgtaagttgaaaagact  
SRR517009.22775022.2- CCAATGGCAGCATCTACTTCTCCgtaagttgaaaagact  
SRR517009.27203532.2+ CCAATGGCAGCATCTACTTCTCCgtaagttgaaaagact  
SRR511892.45271449.1- CCAATGGCAGCATCTACTTCTCCgtaagttgaaaagact  
SRR511911.58123630.2- CCAATGGCAGCATCTACTTCTCCgtaagttgaaaagact  
SRR511911.63363441.2+ CCAATGGCAGCATCTACTTCTCCgtaagttgaaaagact  
SRR511913.39997243.2+ CCAATGGCAGCATCTACTTCTCCgtaagttgaaaagact  
SRR516968.108115361.2- CCAATGGCAGCATCTACTTCTCCgtaagttgaaaagact  
SRR516968.53031658.2- CCAATGGCAGCATCTACTTCTCCgtaagttgaaaagact  
SRR516984.30238767.2+ CCAATGGCAGCATCTACTTCTCCgtaagttgaaaagact  
SRR516988.44933888.1- CCAATGGCAGCATCTACTTCTCCgtaagttgaaaagact  
SRR516996.97571998.1+ CCAATGGCAGCATCTACTTCTCCgtaagttgaaaagact  
SRR517003.82651983.2- CCAATGGCAGCATCTACTTCTCCgtaagttgaaaagact  
SRR511911.1348761.1+ CCAATGGCAGCATCTACTTCTCCgtaagttgaaaagact  
SRR511912.39211104.1- CCAATGGCAGCATCTACTTCTCCgtaagttgaaaagact  
SRR516976.39734428.1+ CCAATGGCAGCATCTACTTCTCCgtaagttgaaaagact  
SRR516977.61637699.1- CCAATGGCAGCATCTACTTCTCCgtaagttgaaaagact  
SRR516978.523901.1- CCAATGGCAGCATCTACTTCTCCgtaagttgaaaagact  
SRR516981.76700255.2- CCAATGGCAGCATCTACTTCTCCgtaagttgaaaagact  
SRR516992.9778136.2+ CCAATGGCAGCCTTACTTCTCCgtaagttgaaaagact  
SRR516999.82809641.2- CCAATGGCAGCATCTACTTCTCCgtaagttgaaaagact  
SRR511911.11918542.2+ CCAATGGCAGCATCTACTTCTCCgtaagttgaaaagact  
SRR511911.31335408.1+ CCAATGGCAGCATCTACTTCTCCgtaagttgaaaagact  
SRR516994.3340112.1+ CCAATGGCAGCATCTACTTCTCCgtaaatgaaaagaattcctctg

SRR517000.90442651.1- CCAATGGCAGCATCTACTTCTCCGtaagttgaaaagacttccctctgcg  
SRR517007.3357101.2+ CCAATGGCAGCAATCTACTTCTCCGtaagttgaaaagacttccctctgcg  
SRR511913.35035416.2- CCAATGGCAGCATCTACTTCTCCGtaagttgaaaagacttccctctgcg  
SRR516968.92422565.1+ CCAATGGCAGCATCTACTTCTCCGtaagttgaaaagacttccctctgcg  
SRR516977.15021422.2+ CCAATGGCAGCATCTACTTCTCCGtaagttgaaaagacttccctctgcg  
SRR516978.7420145.2- CCAATGGCAGCATCTACTTCTCCGtaagttgaaaagacttccctctgcg  
SRR517002.57521468.1- CCAATGGCAGCATCTACTTCTCCGtaagttgaaaagacttccctctgcg  
SRR517004.13346376.1- CCAATGGCAGCATCTACTTCTCCGtaagttgaaaagacttccctctgcg  
SRR517004.35928028.2+ CCAATGGCAGCATCTACTTCTCCGtaagttgaaaagacttccctctgcg  
SRR511913.67606827.2- CCAATGGCAGCATCTACTTCTCCGtaagttgaaaagacttccctctgcg  
SRR516974.1788736.2- CCAATGGCAGCATCTACTTCTCCGtaagttgaaaagacttccctctgcg  
SRR516974.37498085.1- CCAATGGCAGCATCTACTTCTCCGtaagttgaaaagacttccctctgcg  
SRR516977.16954708.1+ CCAATGGCAGCATCTACTTCTCCGtaagttgaaaagacttccctctgcg  
SRR516977.65345009.2+ CCAATGGCAGCATCTACTTCTCCGtaagttgaaaagacttccctctgcg  
SRR516974.20683156.2+ CCAATGGCAGCATCTACTTCTCCGtaagttgaaaagacttccctctgcg  
SRR516980.47721432.1+ CCAATGGCAGCATCTACTTCTCCGtaagttgaaaagacttccctctgcg  
SRR516981.57582697.1+ CCAATGGCAGCATCTACTTCTCCGtaagttgaaaagacttccctctgcg  
SRR516984.72200753.2+ CCAATGGCAGCATCTACTTCTCCGtaagttgaaaagaattccctctgctcc  
SRR516984.81600199.2+ CCAATGGCAGCATCTACTTCTCCGtaagttgaaaagacttccctctgcg  
SRR516986.55336979.1+ CCAATGGCAGCATCTACTTCTCCGtaagttgaaaagacttccctctgctcc  
SRR516994.9392109.1- CCAATGGCAGCATCTACTTCTCCGtaagttgaaaagacttccctctgctcc  
SRR517002.91348480.2- CCAATGGCAGCATCTACTTCTCCGtaagttgaaaagacttccctctgctcc  
SRR511892.54323619.2+ CCAATGGCAGCATCTACTTCTCCGtaagttgaaaagacttccctctgctccc  
SRR511912.35663923.2+ CCAATGGCAGCATCTACTTCTCCGtaagttgaaaagacttccctctgctccc  
SRR511913.39320808.2- CCAATGGCAGCATCTACTTCTCCGtaagttgaaaagacttccctctgctccc  
SRR516979.58152913.1- CCAATGGCAGCATCTACTTCTCCGtaagttgaaaagacttccctctgctccc  
SRR516986.15321637.2- CCAATGGCAGCATCTACTTCTCCGtaagttgaaaagacttccctctgctccc  
SRR516986.31225117.1- CCAATGGCAGCATCTACTTCTCCGtaagttgaaaagacttccctctgctccc  
SRR516967.123439529.1- CCAATGGCAGCATCTGCTTCTCCGtaaaattgaaaagacttccctctgctccct  
SRR516971.10078918.2- CCAATGGCAGCATCTACTTCTCCGtaagttgaaaagacttccctctgctccct  
SRR516971.3527363.1- CCAATGGCAGCATCTACTTCTCCGtaagttgaaaagacttccctctgctccct  
SRR516972.37740896.2- CCAATGGCAGCATCTACTTCTCCGtaagttgaaaagacttccctctgctccct  
SRR516978.59370985.2- CCAATGGCAGCATCTACTTCTCCGtaagttgaaaagacttccctctgctccct  
SRR516979.23680141.2- CCAATGGCAGCATCTACTTCTCCGtaagttgaaaagacttccctctgctccct  
SRR517002.34258022.2- CCAATGGCAGCATCTACTTCTCCGtaagttgaaaagacttccctctgctccct  
SRR516969.10517236.1+ CCAATGGCAGCATCTACTTCTCCGtaagttgaaaagacttccctctgctccctc  
SRR516975.14442724.1+ CCAATGGCAGCATCTACTTCTCCGtaagttgaaaagacttccctctgctccctc  
SRR516996.75219075.1+ CCAATGGCAGCATCTACTTCTCCGtaagttgaaaagacttccctctgctccctc  
SRR517004.51835356.2- CCAATGGCAGCATCTACTTCTCCGtaagttgaaaagacttccctctgctccctc  
SRR517004.60346245.1+ CCAATGGCAGCATCTACTTCTCCGtaagttgaaaagacttccctctgctccctc  
SRR516980.63481299.1+ CCAATGGCAGCATCTACTTCTCCGtaagttgaaaagacttccctctgctccctct  
SRR516990.19507673.1- CCAATGGCAGCATCTACTTCTCCGtaagttgaaaagacttccctctgctccctct  
SRR516996.81352967.2- CCAATGGCAGCATCTACTTCTCCGtaagttgaaaagacttccctctgctccctct  
SRR516967.57599839.1+ CCAATGGCAGCATCTACTTCTCCGtaagttgaaaagacttccctctgctccctct  
SRR516967.66315071.2- CCAATGGCAGCATCTACTTCTCCGtaagttgaaaagacttccctctgctccctct  
SRR516978.79924183.1- CCAATGGCAGCATCTACTTCTCCGtaagttgaaaagacttccctctgctccctct  
SRR516983.62802650.1- CCAATGGCAGCATCTACTTCTCCGtaagttgaaaagacttccctctgctccctct  
SRR516993.60285752.2- CCAATGGCAGCATCTACTTCTCCGtaagttgaaaagacttccctctgctccctct  
SRR516993.89918039.2+ CCAATGGCAGCATCTACTTCTCCGtaagttgaaaagacttccctctgctccctct  
SRR516995.36618898.1- CCAATGGCAGCATCTACTTCTCCGtaagttgaaaagacttccctctgctccctct  
SRR517002.11367864.1+ CCAATGGCAGCATCTACTTCTCCGtaagttgaaaagacttccctctgctccctct  
SRR517006.18548220.1+ CCAATGGCAGCATCTACTTCTCCGtaagttgaaaagacttccctctgctccctct  
SRR516974.26972320.1- CCAATGGCAGCATCTACTTCTCCGtaagttgaaaagacttccctctgctccctctt  
SRR516984.13685120.1- CCAATGGCAGCATCTACTTCTCCGtaagttgaaaagacttccctctgctccctctt  
SRR516984.40512752.1- CCAATGGCAGCATCTACTTCTCCGtaagttgaaaagacttccctctgctccctctt  
SRR516986.7146752.1+ CCAATGGCAGCATCTACTTCTCCGtaagttgaaaagacttccctctgctccctctt  
SRR516991.54568772.2- CCAATGGCAGCATCTACTTCTCCGtaagttgaaaagacttccctctgctccctctt  
SRR516995.44919303.2- CCAATGGCAGCATCTACTTCTCCGtaagttgaaaagacttccctctgctccctctt  
SRR517001.35552097.2- CCAATGGCAGCATCTACTTCTCCGtaagttgaaaagacttccctctgctccctctt  
SRR517001.67367146.1- CCAATGGCAGCATCTACTTCTCCGtaagttgaaaagacttccctctgctccctctt  
SRR517001.88126405.2- CCAATGGCAGCATCTACTTCTCCGtaagttgaaaagacttccctctgctccctctt  
SRR517001.96180514.1- CCAATGGCAGCATCTACTTCTCCGtaagttgaaaagacttccctctgctccctctt  
SRR511911.35430750.2+ CCAATGGCAGCATCTACTTCTCCGtaagttgaaaagacttccctctgctccctctt  
SRR511913.42551667.2- CCAATGGCAGCATCTACTTCTCCGtaagttgaaaagacttccctctgctccctctt  
SRR516977.71785662.2- CCAATGGCAGCATCTACTTCTCCGtaagttgaaaagacttccctctgctccctctt  
SRR516978.71851870.2- CCAATGGCAGCATCTACTTCTCCGtaagttgaaaagacttccctctgctccctctt  
SRR516981.34060961.1+ CCAATGGCAGCATCTAATTCTCCGtaagttgaaaagacttccctctgctccctctt  
SRR516990.55435138.2+ CCAATGGCAGCATCTACTTCTCCGtaagttgaaaagacttccctctgctccctctt  
SRR516990.60833908.1+ CCAATGGCAGCATCTACTTCTCCGtaagttgaaaagacttccctctgctccctctt  
SRR516995.92484603.2- CCAATGGCAGCATCTACTTCTCCGtaagttgaaaagacttccctctgctccctctt  
SRR517006.28401128.1- CCAATGGCAGCATCTACTTCTCCGtaagttgaaaagacttccctctgctccctctt  
SRR517007.3795099.1+ CCAATGGCAGCATCTACTTCTCCGtaagttgaaaagacttccctctgctccctctt  
SRR517008.71700240.2- CCAATGGCAGCATCTACTTCTCCGtaagttgaaaagacttccctctgctccctctt  
SRR511913.32404807.2- CCAATGGCAGCATCTACTTCTCCGtaagttgaaaagacttccctctgctccctctt  
SRR516972.7549648.2+ CCAATGGCAGCATCTACTTCTCCGtaaaattgaaaagacttccctctgctccctctt  
SRR516977.18124717.2- CCAATGGCAGCATCTACTTCTCCGtaagttgaaaagacttccctctgctccctctt  
SRR517000.14089995.1- CCAATGGCAGCATCTACTTCTCCGtaagttgaaaagacttccctctgctccctctt  
SRR511892.12533835.2- CCAATGGCAGCATCTACTTCTCCGtaagttgaaaagacttccctctgctccctctt  
SRR511892.23600637.1- CCAATGGCAGCATCTACTTCTCCGtaagttgaaaagacttccctctgctccctctt  
SRR511892.4161180.2- CCAATGGCAGCATCTACTTCTCCGtaagttgaaaagacttccctctgctccctctt  
SRR511892.42669582.1- CCAATGGCAGCATCTACTTCTCCGtaagttgaaaagacttccctctgctccctctt  
SRR511892.54818066.2- CCAATGGCAGCATCTACTTCTCCGtaagttgaaaagacttccctctgctccctctt  
SRR511892.65847545.1+ CCAATGGCAGCATCTACTTCTCCGtaagttgaaaagacttccctctgctccctctt  
SRR511892.6619238.2- CCAATGGCAGCATCTACTTCTCCGtaagttgaaaagacttccctctgctccctctt

SRR511892.9368196.2- CCAATGGCAGCATCTACTTCTCCGtaagttgaaaagacttccctctgcggtccctctttgccc  
SRR511911.1070600.1- CCAATGGCAGCATCTACTTCTCCGtaagttgaaaagacttccctctgcggtccctctttgccc  
SRR511911.19148709.1- CCAATGGCAGCATCTACTTCTCCGtaagttgaaaagacttccctctgcggtccctctttgccc  
SRR511911.20033258.1- CCAATGGCAGCATCTACTTCTCCGtaagttgaaaagacttccctctgcggtccctctttgccc  
SRR511911.24730437.1- CCAATGGCAGCATCTACTTCTCCGtaagttgaaaagacttccctctgcggtccctctttgccc  
SRR511911.25507918.1+ CCAATGGCAGCATCTACTTCTCCGtaagttgaaaagacttccctctgcggtccctctttgccc  
SRR511911.2753996.1+ CCAATGGCAGCATCTACTTCTCCGtaagttgaaaagacttccctctgcggtccctctttgccc  
SRR511911.2865577.1- CCAATGGCAGCATCTACTTCTCCGtaagttgaaaagacttccctctgcggtccctctttgccc  
SRR511911.3389924.1- CCAATGGCAGCATCTACTTCTCCGtaagttgaaaagacttccctctgcggtccctctttgccc  
SRR511911.35615293.2+ CCAATGGCAGCATCTACTTCTCCGtaagttgaaaagacttccctctgcggtccctctttgccc  
SRR511911.54079531.1- CCAATGGCAGCATCTACTTCTCCGtaagttgaaaagacttccctctgcggtccctctttgccc  
SRR511911.56187465.2- CCAATGGCAGCATCTACTTCTCCGtaagttgaaaagacttccctctgcggtccctctttgccc  
SRR511911.74696838.1- CCAATGGCAGCATCTACTTCTCCGtaagttgaaaagacttccctctgcggtccctctttgccc  
SRR511912.34952624.2- CCAATGGCAGCATCTACTTCTCCGtaagttgaaaagacttccctctgcggtccctctttgccc  
SRR511912.77664739.2+ CCAATGGCAGCATCTACTTCTCCGtaagttgaaaagacttccctctgcggtccctctttgccc  
SRR511913.3134553.2- CCAATGGCAGCATCTACTTCTCCGtaagttgaaaagacttccctctgcggtccctctttgccc  
SRR511913.34197254.1+ CCAATGGCAGCATCTACTTCTCCGtaagttgaaaagacttccctctgcggtccctctttgccc  
SRR511913.35271843.2- CCAATGGCAGCATCTACTTCTCCGtaagttgaaaagacttccctctgcggtccctctttgccc  
SRR511913.61157542.2+ CCAATGGCAGCATCTACTTCTCCGtaagttgaaaagacttccctctgcggtccctctttgccc  
SRR511914.15089362.1+ CCAATGGCAGCATCTACTTCTCCGtaagttgaaaagacttccctctgcggtccctctttgccc  
SRR511914.30434808.1- CCAATGGCAGCATCTACTTCTCCGtaagttgaaaagacttccctctgcggtccctctttgccc  
SRR511914.36821194.2+ CCAATGGCAGCATCTACTTCTCCGtaagttgaaaagacttccctctgcggtccctctttgccc  
SRR511914.3955766.2+ CCAATGGCAGCATCTACTTCTCCGtaagttgaaaagacttccctctgcggtccctctttgccc  
SRR511914.45205869.1+ CCAATGGCAGCATCTACTTCTCCGtaagttgaaaagacttccctctgcggtccctctttgccc  
SRR511914.72910108.2- CCAATGGCAGCATCTACTTCTCCGtaagttgaaaagacttccctctgcggtccctctttgccc  
SRR511915.16586476.2+ CCAATGGCAGCATCTACTTCTCCGtaagttgaaaagacttccctctgcggtccctctttgccc  
SRR511915.20594063.1+ CCAATGGCAGCATCTACTTCTCCGtaagttgaaaagacttccctctgcggtccctctttgccc  
SRR511915.32879460.2+ CCAATGGCAGCATCTACTTCTCCGtaagttgaaaagacttccctctgcggtccctctttgccc  
SRR511915.32879604.2+ CCAATGGCAGCATCTACTTCTCCGtaagttgaaaagacttccctctgcggtccctctttgccc  
SRR511915.8460498.1- CCAATGGCAGCATCTACTTCTCCGtaagttgaaaagacttccctctgcggtccctctttgccc  
SRR511915.8460499.1- CCAATGGCAGCATCTACTTCTCCGtaagttgaaaagacttccctctgcggtccctctttgccc  
SRR516967.106315159.1+ CCAATGGCAGCATCTACTTCTCCGtaagttgaaaagacttccctctgcggtccctctttgccc  
SRR516967.10781394.1+ CCAATGGCAGCATCTACTTCTCCGtaagttgaaaagacttccctctgcggtccctctttgccc  
SRR516967.124110835.1+ CCAATGGCAGCATCTACTTCTCCGtaagttgaaaagacttccctctgcggtccctctttgccc  
SRR516967.135591639.2- CCAATGGCAGCATCTACTTCTCCGtaagttgaaaagacttccctctgcggtccctctttgccc  
SRR516967.14759904.1- CCAATGGCAGCATCTACTTCTCCGtaagttgaaaagacttccctctgcggtccctctttgccc  
SRR516967.22260303.2- CCAATGGCAGCATCTACTTCTCCGtaagttgaaaagacttccctctgcggtccctctttgccc  
SRR516967.23066803.2- CCAATGGCAGCATCTACTTCTCCGtaagttgaaaagacttccctctgcggtccctctttgccc  
SRR516967.2436532.2- CCAATGGCAGCATCTACTTCTCCGtaagttgaaaagacttccctctgcggtccctctttgccc  
SRR516967.30937619.2- CCAATGGCAGCATCTACTTCTCCGtaagttgaaaagacttccctctgcggtccctctttgccc  
SRR516967.40446194.2- CCAATGGCAGCATCTACTTCTCCGtaagttgaaaagacttccctctgcggtccctctttgccc  
SRR516967.41713939.2+ CCAATGGCAGCATCTACTTCTCCGtaagttgaaaagacttccctctgcggtccctctttgccc  
SRR516967.57741754.2+ CCAATGGCAGCATCTACTTCTCCGtaagttgaaaagacttccctctgcggtccctctttgccc  
SRR516967.692820.2- CCAATGGCAGCATCTACTTCTCCGtaagttgaaaagacttccctctgcggtccctctttgccc  
SRR516967.71626809.1- CCAATGGCAGCATCTACTTCTCCGtaagttgaaaagacttccctctgcggtccctctttgccc  
SRR516967.72187734.2- CCAACGGCAACATCTACTTCTCCGtaagttgaaaagacttccctctgcggtccctctttgccc  
SRR516968.24302661.1+ CCAATGGCAGCATCTACTTCTCCGtaagttgaaaagacttccctctgcggtccctctttgccc  
SRR516968.39655396.1- CCAATGGCAGCATCTACTTCTCCGtaagttgaaaagacttccctctgcggtccctctttgccc  
SRR516968.42660308.1- CCAATGGCAGCATCTACTTCTCCGtaagttgaaaagacttccctctgcggtccctctttgccc  
SRR516968.54367312.1- CCAATGGCAGCATCTACTTCTCCGtaagttgaaaagacttccctctgcggtccctctttgccc  
SRR516968.56762513.1+ CCAATGGCAGCATCTACTTCTCCGtaagttgaaaagacttccctctgcggtccctctttgccc  
SRR516968.78882370.2+ CCAATGGCAGCATCTACTTCTCCGtaagttgaaaagacttccctctgcggtccctctttgccc  
SRR516968.78910843.2+ CCAATGGCAGCATCTACTTCTCCGtaagttgaaaagacttccctctgcggtccctctttgccc  
SRR516968.81828792.1- CCAATGGCAGCATCTACTTCTCCGtaagttgaaaagacttccctctgcggtccctctttgccc  
SRR516969.1886920.1+ CCAATGGCAGCATCTACTTCTCCGtaagttgaaaagacttccctctgcggtccctctttgccc  
SRR516969.5105625.2+ CCAATGGCAGCATCTACTTCTCCGtaagttgaaaagacttccctctgcggtccctctttgccc  
SRR516970.28438184.1- CCAATGGCAGCATCTACTTCTCCGtaagttgaaaagacttccctctgcggtccctctttgccc  
SRR516970.31765562.2- CCAATGGCAGCATCTACTTCTCCGtaagttgaaaagacttccctctgcggtccctctttgccc  
SRR516970.4123582.2+ CCAATGGCAGCATCTACTTCTCCGtaagttgaaaagacttccctctgcggtccctctttgccc  
SRR516970.4586121.1+ CCAATGGCAGCATCTACTTCTCCGtaagttgaaaagacttccctctgcggtccctctttgccc  
SRR516971.10454062.1- CCAATGGCAGCATCTACTTCTCCGtaagttgaaaagacttccctctgcggtccctctttgccc  
SRR516972.33835747.2+ CCAATGGCAGCATCTACTTCTCCGtaagttgaaaagacttccctctgcggtccctctttgccc  
SRR516972.79902884.2+ CCAATGGCAGCATCTACTTCTCCGtaagttgaaaagacttccctctgcggtccctctttgccc  
SRR516973.18772931.2- CCAATGGCAGCATCTACTTCTCCGtaagttgaaaagacttccctctgcggtccctctttgccc  
SRR516973.51524397.1+ CCAATGGCAGCATCTACTTCTCCGtaagttgaaaagacttccctctgcggtccctctttgccc  
SRR516973.52438644.1+ CCAATGGCAGCATCTACTTCTCCGtaagttgaaaagacttccctctgcggtccctctttgccc  
SRR516974.22378986.1- CCAATGGCAGCATCTACTTCTCCGtaagttgaaaagacttccctctgcggtccctctttgccc  
SRR516974.22531848.2- CCAATGGCAGCATCTACTTCTCCGtaagttgaaaagacttccctctgcggtccctctttgccc  
SRR516974.52405691.1+ CCAATGGCAGCATCTACTTCTCCGtaagttgaaaagacttccctctgcggtccctctttgccc  
SRR516974.68991541.2+ CCAATGGCAGCATCTACTTCTCCGtaagttgaaaagacttccctctgcggtccctctttgccc  
SRR516974.7795744.1+ CCAATGGCAGCATCTACTTCTCCGtaagttgaaaagacttccctctgcggtccctctttgccc  
SRR516975.1707741.1+ CCAATGGCAGCATCTACTTCTCCGtaagttgaaaagacttccctctgcggtccctctttgccc  
SRR516976.17282199.1- CCAATGGCAGCATCTACTTCTCCGtaagttgaaaagacttccctctgcggtccctctttgccc  
SRR516978.12424990.1+ CCAATGGCAGCATCTACTTCTCCGtaagttgaaaagacttccctctgcggtccctctttgccc  
SRR516978.16880897.2+ CCAATGGCAGCATCTACTTCTCCGtaagttgaaaagacttccctctgcggtccctctttgccc  
SRR516978.31371452.1+ CCAATGGCAGCATCTACTTCTCCGtaagttgaaaagacttccctctgcggtccctctttgccc  
SRR516978.33666848.2+ CCAATGGCAGCATCTACTTCTCCGtaagttgaaaagacttccctctgcggtccctctttgccc  
SRR516978.34278916.1+ CCAATGGCAGCATCTACTTCTCCGtaagttgaaaagacttccctctgcggtccctctttgccc  
SRR516978.36274242.1+ CCAATGGCAGCATCTACTTCTCCGtaagttgaaaagacttccctctgcggtccctctttgccc  
SRR516978.47252201.2- CCAATGGCAGCATCTACTTCTCCGtaagttgaaaagacttccctctgcggtccctctttgccc  
SRR516978.57947464.1+ CCAATGGCAGCATCTACTTCTCCGtaagttgaaaagacttccctctgcggtccctctttgccc  
SRR516979.2283610.2+ CCAATGGCAGCATCTACTTCTCCGtaagttgaaaagacttccctctgcggtccctctttgccc  
SRR516980.2509159.1- CCAATGGCAGCATCTACTTCTCCGtaagttgaaaagacttccctctgcggtccctctttgccc  
SRR516980.25761470.2- CCAATGGCAGCATCTACTTCTCCGtaagttgaaaagacttccctctgcggtccctctttgccc

SRR516980.28746069.1- CCAAGGCATCATCTACTTCTCCGtaagttgaaaagacttccctctgcgctccctctttgcc  
SRR516980.3868284.2- CCAATGGCAGCATCTACTTCTCCGtaagttgaaaagacttccctctgcgctccctctttgcc  
SRR516980.40326797.2- CCAATGGCAGCATCTACTTCTCCGtaagttgaaaagacttccctctgcgctccctctttgcc  
SRR516980.775983.2- CCAATGGCAGCATCTACTTCTCCGtaagttgaaaagacttccctctgcgctccctctttgcc  
SRR516981.2688314.1+ CCAATGGCAGCATCTACTTCTCCGtaagttgaaaagacttccctctgcgctccctctttgcc  
SRR516981.5028621.1- CCAATGGCAGCATCTACTTCTCCGtaagttgaaaagacttccctctgcgctccctctttgcc  
SRR516982.46727106.1- CCAATGGCAGCATCTACTTCTCCGtaagttgaaaagacttccctctgcgctccctctttgcc  
SRR516983.50031803.1+ CCAATGGCAGCATCTACTTCTCCGtaagttgaaaagacttccctctgcgctccctctttgcc  
SRR516983.77412505.1- CCAATGGCAGCATCTACTTCTCCGtaagttgaaaagacttccctctgcgctccctctttgcc  
SRR516984.21208613.1+ CCAATGGCAGCATCTACTTCTCCGtaagttgaaaagacttccctctgcgctccctctttgcc  
SRR516984.49729110.2- CCAATGGCAGCATCTACTTCTCCGtaagttgaaaagacttccctctgcgctccctctttgcc  
SRR516984.91805446.1- CCAATGGCAGCATCTACTTCTCCGtaagttgaaaagacttccctctgcgctccctctttgcc  
SRR516985.36645915.1+ CCAATGGCAGCATCTACTTCTCCGtaagttgaaaagacttccctctgcgctccctctttgcc  
SRR516985.41342798.1- CCAATGGCAGCATCTACTTCTCCGtaagttgaaaagacttccctctgcgctccctctttgcc  
SRR516985.52849243.1- CCAATGGCAGCATCTACTTCTCCGtaagttgaaaagacttccctctgcgctccctctttgcc  
SRR516985.53600329.1+ CCAATGGCAGCATCTACTTCTCCGtaagttgaaaagacttccctctgcgctccctctttgcc  
SRR516985.68798507.2+ CCAATGGCAGCATCTACTTCTCCGtaagttgaaaagacttccctctgcgctccctctttgcc  
SRR516985.88024111.2- CCAATGGCAGCATCTACTTCTCCGtaagttgaaaagacttccctctgcgctccctctttgcc  
SRR516986.3185698.1+ CCAATGGCAGCATCTACTTCTCCGtaagttgaaaagacttccctctgcgctccctctttgcc  
SRR516986.37734465.1- CCAATGGCAGCATCTACTTCTCCGtaagttgaaaagacttccctctgcgctccctctttgcc  
SRR516986.41476073.2- CCAATGGCAGCATCTACTTCTCCGtaagttgaaaagacttccctctgcgctccctctttgcc  
SRR516986.43777664.2- CCAATGGCAGCATCTACTTCTCCGtaagttgaaaagacttccctctgcgctccctctttgcc  
SRR516986.49636629.1- CCAATGGCAGCATCTACTTCTCCGtaagttgaaaagacttccctctgcgctccctctttgcc  
SRR516986.5238698.2+ CCAATGGCAGCATCTACTTCTCCGtaagttgaaaagacttccctctgcgctccctctttgcc  
SRR516986.64170753.2+ CCAATGGCAGCATCTACTTCTCCGtaagttgaaaagacttccctctgcgctccctctttgcc  
SRR516987.20421578.2- CCAATGGCAGCATCTACTTCTCCGtaagttgaaaagacttccctctgcgctccctctttgcc  
SRR516987.24003748.2+ CCAATGGCAGCATCTACTTCTCCGtaagttgaaaagacttccctctgcgctccctctttgcc  
SRR516987.32634383.2+ CCAATGGCAGCATCTACTTCTCCGtaagttgaaaagacttccctctgcgctccctctttgcc  
SRR516987.57947905.1- CCAATGGCAGCATCTACTTCTCCGtaagttgaaaagacttccctctgagtcctctttgcc  
SRR516988.12631476.2- CCAATGGCAGCATCTACTTCTCCGtaagttgaaaagacttccctctgcgctccctctttgcc  
SRR516988.15095747.2+ CCAATGGCAGCATCTACTTCTCCGtaagttgaaaagacttccctctgcgctccctctttgcc  
SRR516988.2226181.1+ CCAATGGCAGCATCTACTTCTCCGtaagttgaaaagacttccctctgcgctccctctttgcc  
SRR516988.3021865.2- CCAATGGCAGCATCTACTTCTCCGtaagttgaaaagacttccctctgcgctccctctttgcc  
SRR516988.35162539.2+ CCAATGGCAGCATCTACTTCTCCGtaagttgaaaagacttccctctgcgctccctctttgcc  
SRR516988.39872613.2+ CCAATGGCAGCATCTACTTCTCCGtaagttgaaaagacttccctctgcgctccctctttgcc  
SRR516989.32421189.1- CCAATGGCAGCATCTACTTCTCCGtaagttgaaaagacttccctctgcgctccctctttgcc  
SRR516989.41185156.2+ CCAATGGCAGCATCTACTTCTCCGtaagttgaaaagacttccctctgcgctccctctttgcc  
SRR516989.52805078.2+ CCAATGGCAGCATCTACTTCTCCGtaagttgaaaagacttccctctgcgctccctctttgcc  
SRR516989.70274568.1- CCAATGGCAGCATCTACTTCTCCGtaagttgaaaagacttccctctgcgctccctctttgcc  
SRR516990.10179653.1+ CCAATGGCAGCATCTACTTCTCCGtaagttgaaaagacttccctctgcgctccctctttgcc  
SRR516990.14450506.1- CCAATGGCAGCATCTACTTCTCCGtaagttgaaaagacttccctctgcgctccctctttgcc  
SRR516990.60778082.1- CCAATGGCAGCATCTACTTCTCCGtaagttgaaaagacttccctctgcgctccctctttgcc  
SRR516991.17316272.1- CCAATGGCAGCATCTACTTCTCCGtaagttgaaaagacttccctctgcgctccctctttgcc  
SRR516991.84042397.1+ CCAATGGCAGCATCTACTTCTCCGtaagttgaaaagacttccctctgcgctccctctttgcc  
SRR516992.47247048.2- CCAATGGCAGCATCTACTTCTCCGtaagttgaaaagacttccctctgcgctccctctttgcc  
SRR516992.55128523.1+ CCAATGGCAGCATCTACTTCTCCGtaagttgaaaagacttccctctgcgctccctctttgcc  
SRR516992.73689497.1+ CCAATGGCAGCATCTACTTCTCCGtaagttgaaaagacttccctctgcgctccctctttgcc  
SRR516993.22248191.1- CCAATGGCAGCATCTACTTCTCCGtaagttgaaaagacttccctctgcgctccctctttgcc  
SRR516993.6697428.2+ CCAATGGCAGCATCTACTTCTCCGtaagttgaaaagacttccctctgcgctccctctttgcc  
SRR516993.88041825.1- CCAATGGCAGCATCTACTTCTCCGtaagttgaaaagacttccctctgcgctccctctttgcc  
SRR516994.26366517.1- CCAATGGCAGCATCTACTTCTCCGtaagttgaaaagacttccctctgcgctccctctttgcc  
SRR516994.26789295.2- CCAATGGCAGCATCTACTTCTCCGtaagttgaaaagacttccctctgcgctccctctttgcc  
SRR516994.55351595.2- CCAATGGCAGCATCTACTTCTCCGtaagttgaaaagacttccctctgcgctccctctttgcc  
SRR516994.66993668.2- CCAATGGCAGCATCTACTTCTCCGtaagttgaaaagacttccctctgcgctccctctttgcc  
SRR516994.84145190.1- CCAATGGCAGCATCTACTTCTCCGtaagttgaaaagacttccctctgcgctccctctttgcc  
SRR516995.11496028.1- CCAATGGCAGCATCTACTTCTCCGtaagttgaaaagacttccctctgcgctccctctttgcc  
SRR516995.18825621.1+ CCAATGGCAGCATCTACTTCTCCGtaagttgaaaagacttccctctgcgctccctctttgcc  
SRR516995.21670383.2+ CCAATGGCAGCATCTACTTCTCCGtaagttgaaaagacttccctctgcgctccctctttgcc  
SRR516995.28796839.1- CCAATGGCAGCATCTACTTCTCCGtaagttgaaaagacttccctctgcgctccctctttgcc  
SRR516995.37587733.2- CCAATGGCAGCATCTACTTCTCCGtaagttgaaaagacttccctctgcgctccctctttgcc  
SRR516995.39713292.2+ CCAATGGCAGCATCTACTTCTCCGtaagttgaaaagacttccctctgcgctccctctttgcc  
SRR516995.51804784.1- CCAATGGCAGCATCTACTTCTCCGtaagttgaaaagacttccctctgcgctccctctttgcc  
SRR516995.53414570.2+ CCAATGGCAGCATCTACTTCTCCGtaagttgaaaagacttccctctgcgctccctctttgcc  
SRR516995.64633284.1+ CCAATGGCAGCATCTACTTCTCCGtaagttgaaaagacttccctctgcgctccctctttgcc  
SRR516995.68978295.1+ CCAATGGCAGCATCTACTTCTCCGtaagttgaaaagacttccctctgcgctccctctttgcc  
SRR516995.69712712.2+ CCAATGGCAGCATCTACTTCTCCGtaagttgaaaagacttccctctgcgctccctctttgcc  
SRR516995.88022888.2+ CCAATGGCAGCATCTACTTCTCCGtaagttgaaaagacttccctctgcgctccctctttgcc  
SRR516996.44208108.1+ CCAATGGCAGCATCTACTTCTCCGtaagttgaaaagacttccctctgcgctccctctttgcc  
SRR516996.75812492.2+ CCAATGGCAGCATCTACTTCTCCGtaagttgaaaagacttccctctgcgctccctctttgcc  
SRR516996.81858289.1+ CCAATGGCAGCATCTACTTCTCCGtaagttgaaaagacttccctctgcgctccctctttgcc  
SRR516997.49291908.1- CCAATGGCAGCATCTACTTCTCCGtaagttgaaaagacttccctctgcgctccctctttgcc  
SRR516997.74953572.2+ CCAATGGCAGCATCTACTTCTCCGtaagttgaaaagacttccactgcgctccctctttgcc  
SRR516997.94233769.2+ CCAATGGCAGCATCTACTTCTCCGtaagttgaaaagacttccctctgcgctccctctttgcc  
SRR516998.10352572.2+ CCAATGGCAGCATCTACTTCTCCGtaagttgaaaagacttccctctgcgctccctctttgcc  
SRR516998.28329965.2+ CCAATGGCAGCATCTACTTCTCCGtaagttgaaaagacttccctctgcgctccctctttgcc  
SRR516998.29101479.1- CCAATGGCAGCATCTACTTCTCCGtaagttgaaaagacttccctctgcgctccctctttgcc  
SRR516998.59445481.2- CCAATGGCAGCATCTACTTCTCCGtaagttgaaaagacttccctctgcgctccctctttgcc  
SRR516998.60968600.2- CCAATGGCAGCATCTACTTCTCCGtaagttgaaaagacttccctctgcgctccctctttgcc  
SRR516998.62511336.1- CCAATGGCAGCATCTACTTCTCCGtaagttgaaaagacttccctctgcgctccctctttgcc  
SRR516998.70570011.2- CCAATGGCAGCATCTACTTCTCCGtaagttgaaaagacttccctctgcgctccctctttgcc  
SRR516998.72828587.1+ CCAATGGCAGCATCTACTTCTCCGtaagttgaaaagacttccctctgcgctccctctttgcc  
SRR516998.94356641.1+ CCAATGGCAGCATCTACTTCTCCGtaagttgaaaagacttccctctgcgctccctctttgcc  
SRR516998.96733754.2- CCAATGGCAGCATCTACTTCTCCGtaagttgaaaagacttccctctgcgctccctctttgcc  
SRR516998.98321200.2- CCAATGGCAGCATCTACTTCTCCGtaagttgaaaagacttccctctgcgctccctctttgcc

SRR516999.12781921.1+ CCAATGGCAGCATCTACTTCTCCGtaagttgaaaagacttccctctgcggtccctctttgccc  
SRR516999.25368915.2+ CCAATGGCAGCATCTACTTCTCCGtaagttgaaaagacttccctctgcggtccctctttgccc  
SRR516999.2638208.1- CCAATGGCAGCATCTACTTCTCCGtaagttgaaaagacttccctctgcggtccctctttgccc  
SRR516999.28114376.1- CCAATGGCAGCATCTACTTCTCCGtaagttgaaaagacttccctctgcggtccctctttgccc  
SRR516999.51370430.2+ CCAATGGCAGCATCTACTTCTCCGtaagttgaaaagacttccctctgcggtccctctttgccc  
SRR516999.69510462.1+ CCAATGGCAGCATCTACTTCTCCGtaagttgaaaagacttccctctgcggtccctctttgccc  
SRR516999.81142078.2- CCAATGGCAGCATCTACTTCTCCGtaagttgaaaagacttccctctgcggtccctctttgccc  
SRR517000.105547603.2+ CCAATGGCAGCATCTACTTCTCCGtaagttgaaaagacttccctctgcggtccctctttgccc  
SRR517000.17971450.2+ CCAATGGCAGCATCTACTTCTCCGtaagttgaaaagacttccctctgcggtccctctttgccc  
SRR517000.2083309.2+ CCAATGGCAGCATCTACTTCTCCGtaagttgaaaagacttccctctgcggtccctctttgccc  
SRR517000.28657256.2- CCAATGGCAGCATCTACTTCTCCGtaagttgaaaagacttccctctgcggtccctctttgccc  
SRR517000.38379134.1- CCAATGGCAGCATCTACTTCTCCGtaagttgaaaagacttccctctgcggtccctctttgccc  
SRR517000.40713109.1- CCAATGGCAGCATCTACTTCTCCGtaagttgaaaagacttccctctgcggtccctctttgccc  
SRR517000.43080184.1+ CCAATGGCAGCATCTACTTCTCCGtaagttgaaaagacttccctctgcggtccctctttgccc  
SRR517000.62667511.1+ CCAATGGCAGCATCTACTTCTCCGtaagttgaaaagacttccctctgcggtccctctttgccc  
SRR517000.94848556.1- CCAATGGCAGCATCTACTTCTCCGtaagttgaaaagacttccctctgcggtccctctttgccc  
SRR517001.103363219.1+ CCAATGGCAGCATCTACTTCTCCGtaagttgaaaagacttccctctgcggtccctctttgccc  
SRR517001.36815698.1+ CCAATGGCAGCATCTACTTCTCCGtaagttgaaaagacttccctctgcggtccctctttgccc  
SRR517001.43868988.1- CCAATGGCAGCATCTACTTCTCCGtaagttgaaaagacttccctctgcggtccctctttgccc  
SRR517001.52204355.2+ CCAATGGCAGCATCTACTTCTCCGtaagttgaaaagacttccctctgcggtccctctttgccc  
SRR517001.74558392.2- CCAATGGCAGCATCTACTTCTCCGtaagttgaaaagacttccctctgcggtccctctttgccc  
SRR517001.89746771.1- CCAATGGCAGCATCTACTTCTCCGtaagttgaaaagacttccctctgcggtccctctttgccc  
SRR517002.13637222.1- CCAATGGCAGCATCTACTTCTCCGtaagttgaaaagacttccctctgcggtccctctttgccc  
SRR517002.3322034.1- CCAATGGCAGCATCTACTTCTCCGtaagttgaaaagacttccctctgcggtccctctttgccc  
SRR517002.33929122.2+ CCAATGGCAGCATCTACTTCTCCGtaagttgaaaagacttccctctgcggtccctctttgccc  
SRR517002.60341884.1+ CCAATGGCAGCATCTACTTCTCCGtaagttgaaaagacttccctctgcggtccctctttgccc  
SRR517003.33278135.2+ CCAATGGCAGCATCTACTTCTCCGtaagttgaaaagacttccctctgcggtccctctttgccc  
SRR517003.35492282.1+ CCAATGGCAGCATCTACTTCTCCGtaagttgaaaagacttccctctgcggtccctctttgccc  
SRR517003.37121286.2- CCAATGGCAGCATCTACTTCTCCGtaagttgaaaagacttccctctgcggtccctctttgccc  
SRR517003.37904939.2+ CCAATGGCAGCATCTACTTCTCCGtaagttgaaaagacttccctctgcggtccctctttgccc  
SRR517003.46003185.2- CCAATGGCAGCATCTACTTCTCCGtaagttgaaaagacttccctctgcggtccctctttgccc  
SRR517003.46003189.2- CCAATGGCAGCATCTACTTCTCCGtaagttgaaaagacttccctctgcggtccctctttgccc  
SRR517003.49139834.1+ CCAATGGCAGCATCTACTTCTCCGtaagttgaaaagacttccctctgcggtccctctttgccc  
SRR517004.1229485.2+ CCAATGGCAGCATCTACTTCTCCGtaagttgaaaagacttccctctgcggtccctctttgccc  
SRR517004.29851537.1+ CCAATGGCAGCATCTACTTCTCCGtaagttgaaaagacttccctctgcggtccctctttgccc  
SRR517004.35999263.2- CCAATGGCAGCATCTACTTCTCCGtaagttgaaaagacttccctctgcggtccctctttgccc  
SRR517004.54443238.1+ CCAATGGCAGCATCTACTTCTCCGtaagttgaaaagacttccctctgcggtccctctttgccc  
SRR517005.12336995.1+ CCAATGGCAGCATCTACTTCTCCGtaagttgaaaagacttccctctgcggtccctctttgccc  
SRR517005.22087228.1- CCAATGGCAGCATCTACTTCTCCGtaagttgaaaagacttccctctgcggtccctctttgccc  
SRR517005.5761837.2+ CCAATGGCAGCATCTACTTCTCCGtaagttgaaaagacttccctctgcggtccctctttgccc  
SRR517005.63490107.1- CCAATGGCAGCATCTACTTCTCCGtaagttgaaaagacttccctctgcggtccctctttgccc  
SRR517005.76976432.1+ CCAATGGCAGCATCTACTTCTCCGtaagttgaaaagacttccctctgcggtccctctttgccc  
SRR517006.16403245.2- CCAATGGCAGCATCTACTTCTCCGtaagttgaaaagacttccctctgcggtccctctttgccc  
SRR517006.17097416.1- CCAATGGCAGCATCTACTTCTCCGtaagttgaaaagacttccctctgcggtccctctttgccc  
SRR517006.40089046.1- CCAATGGCAGCATCTACTTCTCCGtaagttgaaaagacttccctctgcggtccctctttgccc  
SRR517006.48465992.1+ CCAATGGCAGCATCTACTTCTCCGtaagttgaaaagacttccctctgcggtccctctttgccc  
SRR517006.63297513.1+ CCAATGGCAGCATCTACTTCTCCGtaagttgaaaagacttccctctgcggtccctctttgccc  
SRR517006.68098848.2- CCAATGGCAGCATCTACTTCTCCGtaagttgaaaagacttccctctgcggtccctctttgccc  
SRR517007.27209892.1- CCAATGGCAGCATCTACTTCTCCGtaagttgaaaagacttccctctgcggtccctctttgccc  
SRR517007.28898075.1- CCAATGGCAGCATCTACTTCTCCGtaagttgaaaagacttccctctgcggtccctctttgccc  
SRR517007.52883726.1- CCAATGGCAGCATCTACTTCTCCGtaagttgaaaagacttccctctgcggtccctctttgccc  
SRR517007.60677870.2- CCAATGGCAGCATCTACTTCTCCGtaagttgaaaagacttccctctgcggtccctctttgccc  
SRR517007.65469916.1- CCAATGGCAGCATCTACTTCTCCGtaagttgaaaagacttccctctgcggtccctctttgccc  
SRR517008.1945327.2+ CCAATGGCAGCATCTACTTCTCCGtaagttgaaaagacttccctctgcggtccctctttgccc  
SRR517008.23794481.2- CCAATGGCAGCATCTACTTCTCCGtaagttgaaaagacttccctctgcggtccctctttgccc  
SRR517008.3800488.2- CCAATGGCAGCATCTACTTCTCCGtaagttgaaaagacttccctctgcggtccctctttgccc  
SRR517008.38108470.2+ CCAATGGCAGCATCTACTTCTCCGtaagttgaaaagacttccctctgcggtccctctttgccc  
SRR517008.38355138.1- CCAATGGCAGCATCTACTTCTCCGtaagttgaaaagacttccctctgcggtccctctttgccc  
SRR517008.4270466.1- CCAATGGCAGCATCTACTTCTCCGtaagttgaaaagacttccctctgcggtccctctttgccc  
SRR517008.42787980.2+ CCAATGGCAGCATCTACTTCTCCGtaagttgaaaagacttccctctgcggtccctctttgccc  
SRR517008.80424603.2- CCAATGGCAGCATCTACTTCTCCGtaagttgaaaagacttccctctgcggtccctctttgccc  
SRR517009.20742062.1- CCAATGGCAGCATCTACTTCTCCGtaagttgaaaagacttccctctgcggtccctctttgccc  
SRR517009.21340928.1+ CCAATGGCAGCATCTACTTCTCCGtaagttgaaaagacttccctctgcggtccctctttgccc  
SRR517009.45728121.1+ CCAATGGCAGCATCTACTTCTCCGtaagttgaaaagacttccctctgcggtccctctttgccc  
SRR517009.60480305.2+ CCAATGGCAGCATCTACTTCTCCGtaagttgaaaagacttccctctgcggtccctctttgccc  
SRR517009.64828053.1+ CCAATGGCAGCATCTACTTCTCCGtaagttgaaaagacttccctctgcggtccctctttgccc  
SRR517009.69208174.1- CCAATGGCAGCATCTACTTCTCCGtaagttgaaaagacttccctctgcggtccctctttgccc  
SRR517009.81050649.2- CCAATGGCAGCATCTACTTCTCCGtaagttgaaaagacttccctctgcggtccctctttgccc  
SRR517009.8825375.1+ CCAATGGCAGCATCTACTTCTCCGtaagttgaaaagacttccctctgcggtccctctttgccc  
SRR516968.37214890.2- CAATGGCAGCATCTACTTCTCCGtaagttgaaaagacttccctctgcggtccctctttgccc  
SRR516974.56217086.2+ CAATGGCAGCATCTACTTCTCCGtaagttgaaaagacttccctctgcggtccctctttgccc  
SRR516994.78490657.1+ CAATGGCAGCATCTACTTCTCCGtaagttgaaaagacttccctctgcggtccctctttgccc  
SRR516999.49488894.2- CAATGGCAGCATCTACTTCTCCGtaagttgaaaagacttccctctgcggtccctctttgccc  
SRR516974.64853297.1+ AATGGCAGCATCTACTTCTCCGtaagttgaaaagacttccctctgcggtccctctttgccc  
SRR516998.63498480.1+ AATGGCAGCATCTACTTCTCCGtaagttgaaaagacttccctctgcggtccctctttgccc  
SRR516998.85413374.2- AATGGCAGCATCTACTTCTCCGtaagttgaaaagacttccctctgcggtccctctttgccc  
SRR517008.31261980.1+ AATGGCAGCATCTACTTCTCCGtaagttgaaaagacttccctctgcggtccctctttgccc  
SRR517009.12755840.1- AATGGCAGCATCTACTTCTCCGtaagttgaaaagacttccctctgcggtccctctttgccc  
SRR516974.72399904.1+ ATGGCAGCATCTACTTCTCCGtaagttgaaaagacttccctctgcggtccctctttgccc  
SRR517008.73275508.2- ATGGCAGCATCTACTTCTCCGtaagttgaaaagacttccctctgcggtccctctttgccc  
SRR516967.141008204.2+ TGGCAGCATCTACTTCTCCGtaagttgaaaagacttccctctgcggtccctctttgccc  
SRR516977.13601535.2- TGGCAGCATCTACTTCTCCGtaagttgaaaagacttccctctgcggtccctctttgccc  
SRR516977.69611362.1- TGGCAGCATCTACTTCTCCGtaagttgaaaagacttccctctgcggtccctctttgccc  
SRR516986.65904528.1- TGGCAGCATCTACTTCTCCGtaagttgaaaagacttccctctgcggtccctctttgccc

SRR517003.46053853.2+ TGGCAGCATCTACTTCTCCGtaagttgaaaagacttccctctgcgctccctctttgccc  
SRR517003.53406887.1+ TGGCAGCATCTACTTCTCCGtaagttgaaaagacttccctctgcgctccctctttgccc  
SRR517005.86090511.2+ TGGCAGCATCTACTTCTCCGtaagttgaaaagacttccctctgcgctccctctttgccc  
SRR511911.46262638.2+ GGCAGCATCTACTTCTCCGtaagttgaaaagacttccctctgcgctccctctttgccc  
SRR516970.7640225.1- GGCAGCATCTACTTCTCCGtaagttgaaaagacttccctctgcgctccctctttgccc  
SRR516972.39048989.1- GGCAGCATCTACTTCTCCGtaagttgaaaagacttccctctgcgctccctctttgccc  
SRR516975.30822760.2- GGCAGCATCTACTTCTCCGtaagttgaaaagacttccctctgcgctccctctttgccc  
SRR516977.26165189.2+ GGCAGCATCTACTTCTCCGtaagttgaaaagacttccctctgcgctccctctttgccc  
SRR516979.69530139.2- GGCAGCATCTACTTCTCCGtaagttgaaaagacttccctctgcgctccctctttgccc  
SRR516981.20922821.2- GGCAGCATCTACTTCTCCGtaagttgaaaagacttccctctgcgctccctctttgccc  
SRR516985.54679927.1+ GGCAGCATCTACTTCTCCGtaagttgaaaagacttccctctgcgctccctctttgccc  
SRR516992.69961004.2- GGCAGCATCTACTTCTCCGtaagttgaaaagacttccctctgcgctccctctttgccc  
SRR516995.88144119.1+ GGCAGCATCTACTTCTCCGtaagttgaaaagacttccctctgcgctccctctttgccc  
SRR516996.39635165.1+ GGCAGCATCTACTTCTCCGtaagttgaaaagacttccctctgcgctccctctttgccc  
SRR516975.20052745.1- GCAGCATCTACTTCTCCGtaagttgaaaagacttccctctgcgctccctctttgccc  
SRR516976.38940434.2+ GCAGCATCTACTTCTCCGtaagttgaaaagacttccctctgcgctccctctttgccc  
SRR516977.41688351.2+ GCAGCATCTACTTCTCCGtaagttgaaaagacttccctctgcgctccctctttgccc  
SRR516981.30629252.2- GCAGCATCTACTTCTCCGtaagttgaaaagacttccctctgcgctccctctttgccc  
SRR516996.89760632.1- GCAGCATCTACTTCTCCGtaagttgaaaagacttccctctgcgctccctctttgccc  
SRR517001.15533161.1- GCAGCATCTACTTCTCCGtaagttgaaaagacttccctctgcgctccctctttgccc  
SRR517005.68594324.2- GCAGCATCTACTTCTCCGtaagttgaaaagacttccctctgcgctccctctttgccc  
SRR516968.109900230.2- CAGCATCTACTTCTCCGtaagttgaaaagacttccctctgcgctccctctttgccc  
SRR516979.16124664.1- CAGCATCTACTTCTCCGtaagttgaaaagacttccctctgcgctccctctttgccc  
SRR516983.61644045.1+ CAGCATCTACTTCTCCGtaagttgaaaagacttccctctgcgctccctctttgccc  
SRR516986.7462760.1- CAGCATCTACTTCTCCGtaagttgaaaagacttccctctgcgctccctctttgccc  
SRR516987.49326432.1- CAGCATCTACTTCTCCGtaagttgaaaagacttccctctgcgctccctctttgccc  
SRR516987.64786739.2- CAGCATCTACTTCTCCGtaagttgaaaagacttccctctgcgctccctctttgccc  
SRR516997.31433076.1+ CAGCATCTACTTCTCCGtaagttgaaaagacttccctctgcgctccctctttgccc  
SRR516997.88273145.1+ CAGCATCTACTTCTCCGtaagttgaaaagacttccctctgcgctccctctttgccc  
SRR516998.97862365.1+ CAGCATCTACTTCTCCGtaagttgaaaagacttccctctgcgctccctctttgccc  
SRR517004.53711062.2+ CAGCATCTACTTCTCCGtaagttgaaaagacttccctctgcgctccctctttgccc  
SRR517009.40763089.2+ CAGCATCTACTTCTCCGtaagttgaaaagacttccctctgcgctccctctttgccc  
SRR511912.11118205.2+ AGCATCTACTTCTCCGtaagttgaaaagacttccctctgcgctccctctttgccc  
SRR511912.60332391.1- AGCATCTACTTCTCCGtaagttgaaaagacttccctctgcgctccctctttgccc  
SRR511912.60332545.1- AGCATCTACTTCTCCGtaagttgaaaagacttccctctgcgctccctctttgccc  
SRR511914.71956528.2- AGCATCTACTTCTCCGtaagttgaaaagacttccctctgcgctccctctttgccc  
SRR516967.88384226.1- AGCATCTACTTCTCCGtaagttgaaaagacttccctctgcgctccctctttgccc  
SRR516969.18417523.2+ AGCATCTACTTCTCCGtaagttgaaaagacttccctctgcgctccctctttgccc  
SRR516969.9631131.2- AGCATCTACTTCTCCGtaagttgaaaagacttccctctgcgctccctctttgccc  
SRR516971.24445351.2- AGCATCTACTTCTCCGtaagttgaaaagacttccctctgcgctccctctttgccc  
SRR516975.25668571.1+ AGCATCTACTTCTCCGtaagttgaaaagacttccctctgcgctccctctttgccc  
SRR516982.32243345.1+ AGCATCTACTTCTCCGtaagttgaaaagacttccctctgcgctccctctttgccc  
SRR516983.48910894.2+ AGCATCTACTTCTCCGtaagttgaaaagacttccctctgcgctccctctttgccc  
SRR516999.13449474.2+ AGCATCTACTTCTCCGtaagttgaaaagacttccctctgcgctccctctttgccc  
SRR517002.68056350.1+ AGCATCTACTTCTCCGtaagttgaaaagacttccctctgcgctccctctttgccc  
SRR517004.25302532.1- AGCATCTACTTCTCCGtaagttgaaaagacttccctctgcgctccctctttgccc  
SRR517005.96155006.2- AGCATCTACTTCTCCGtaagttgaaaagacttccctctgcgctccctctttgccc  
SRR517006.42670235.2- GCATCTACTTCTCCGtaagttgaaaagacttccctctgcgctccctctttgccc  
SRR511916.518392.1- GCATCTACTTCTCCGtaagttgaaaagacttccctctgcgctccctctttgccc  
SRR511916.520845.1- GCATCTACTTCTCCGtaagttgaaaagacttccctctgcgctccctctttgccc  
SRR511916.61995804.1- GCATCTACTTCTCCGtaagttgaaaagacttccctctgcgctccctctttgccc  
SRR516967.83635052.1+ GCATCTACTTCTCCGtaagttgaaaagacttccctctgcgctccctctttgccc  
SRR516978.12749059.1- GCATCTACTTCTCCGtaagttgaaaagacttccctctgcgctccctctttgccc  
SRR516981.56307628.1- GCATCTACTTCTCCGtaagttgaaaagacttccctctgcgctccctctttgccc  
SRR516990.36019817.1- GCATCTACTTCTCCGtaagttgaaaagacttccctctgcgctccctctttgccc  
SRR516994.66665340.2- GCATCTACTTCTCCGtaagttgaaaagacttccctctgcgctccctctttgccc  
SRR516995.85354243.2+ GCATCTACTTCTCCGtaagttgaaaagacttccctctgcgctccctctttgccc  
SRR516998.89372575.2+ GCATCTACTTCTCCGtaagttgaaaagacttccctctgcgctccctctttgccc  
SRR516999.89579473.1+ GCATCTACTTCTCCGtaagttgaaaagacttccctctgcgctccctctttgccc  
SRR511916.25407227.1+ CATCTACTTCTCCGtaagttgaaaagacttccctctgcgctccctctttgccc  
SRR511914.15254481.1+ CATCTACTTCTCCGtaagttgaaaagacttccctctgcgctccctctttgccc  
SRR516968.7574142.2- CATCTACTTCTCCGtaagttgaaaagacttccctctgcgctccctctttgccc  
SRR516977.83265007.2+ CATCTACTTCTCCGtaagttgaaaagacttccctctgcgctccctctttgccc  
SRR516978.45987045.1- CATCTACTTCTCCGtaagttgaaaagacttccctctgcgctccctctttgccc  
SRR516982.35528402.1- CATCTACTTCTCCGtaagttgaaaagacttccctctgcgctccctctttgccc  
SRR516984.30012495.2+ CATCTACTTCTCCGtaagttgaaaagacttccctctgcgctccctctttgccc  
SRR516994.13341376.1- CATCTACTTCTCCGtaagttgaaaagacttccctctgcgctccctctttgccc  
SRR516994.49602276.2+ CATCTACTTCTCCGtaagttgaaaagacttccctctgcgctccctctttgccc  
SRR516997.74138406.1- CATCTACTTCTCCGtaagttgaaaagacttccctctgcgctccctctttgccc  
SRR511892.40440531.1+ ATCTACTTCTCCGtaagttgaaaagacttccctctgcgctccctctttgccc  
SRR511914.61275803.2- ATCTACTTCTCCGtaagttgaaaagacttccctctgcgctccctctttgccc  
SRR511914.70015434.2- ATCTACTTCTCCGtaagttgaaaagacttccctctgcgctccctctttgccc  
SRR516967.126650903.2+ ATCTACTTCTCCGtaagttgaaaagacttccctctgcgctccctctttgccc  
SRR516972.50240772.2- ATCTACTTCTCCGtaagttgaaaagacttccctctgcgctccctctttgccc  
SRR516972.50240775.2- ATCTACTTCTCCGtaagttgaaaagacttccctctgcgctccctctttgccc  
SRR516974.5445980.2+ ATCTACTTCTCCGtaagttgaaaagacttccctctgcgctccctctttgccc  
SRR516978.39800576.1- ATCTACTTCTCCGtaagttgaaaagacttccctctgcgctccctctttgccc  
SRR516980.2885002.2+ ATCTACTTCTCCGtaagttgaaaagacttccctctgcgctccctctttgccc  
SRR516987.11233788.1+ ATCTACTTCTCCGtaagttgaaaagacttccctctgcgctccctctttgccc  
SRR516994.48478756.1+ ATCTACTTCTCCGtaagttgaaaagacttccctctgcgctccctctttgccc  
SRR516994.70278140.1+ ATCTACTTCTCCGtaagttgaaaagacttccctctgcgctccctctttgccc  
SRR516995.70042273.1+ ATCTACTTCTCCGtaagttgaaaagacttccctctgcgctccctctttgccc  
SRR516996.23796146.1+ ATCTACTTCTCCGtaagttgaaaagacttccctctgcgctccctctttgccc  
SRR517000.36416800.2- ATCTACTTCTCCGtaagttgaaaagacttccctctgcgctccctctttgccc





SRR516977.31933289.1-  
SRR516979.3253001.2-  
SRR516994.12728631.1-  
SRR516995.57402881.1-  
SRR516995.9806597.1+  
SRR516998.90514942.1+  
SRR516999.56852286.2-  
SRR516999.85004778.2+  
SRR517006.1651318.2+  
SRR511914.42597042.2+  
SRR516971.6357400.1+  
SRR516979.20038553.2-  
SRR516981.40380711.2-  
SRR517000.42965244.2-  
SRR517002.50588676.1-  
SRR511911.11918542.1-  
SRR511914.45816401.1-  
SRR516976.36662272.1-  
SRR516979.61310102.2+  
SRR516979.79499176.2+  
SRR516982.7524222.1-  
SRR516989.86262903.2+  
SRR516994.68821829.1-  
SRR517001.29555002.2+

TCCgtaagttgaaaagacttccctctgcgctccctctttgcc  
TCCgtaagttgaaaagacatccctctgcgctccctctttgcc  
TCCgtaagttgaaaagacttccctctgcgctccctctttgcc  
TCCgtaagttgaaaagacttccctctgcgctccctctttgcc  
TCCgtaagttgaaaagacttccctctgcgctccctctttgcc  
TCCgtaagttgaaaagacttccctctgcgctccctctttgcc  
TCCgtaagttgaaaagacttccctctgcgctccctctttgcc  
TCCgtaagttgaaaagacttccctctgcgctccctctttgcc  
CCgtaagttgaaaagacttccctctgcgctccctctttgcc  
CCgtaagttgaaaagacttccctctgcgctccctctttgcc  
CCgtaagttgaaaagacttccctctgcgctccctctttgcc  
CCgtaagttgaaaagacttccctctgcgctccctctttgcc  
CCgtaagttgaaaagacttccctctgcgctccctctttgcc  
CCgtaagttgaaaagacttccctctgcgctccctctttgcc  
Cgtaagttgaaaagacttccctctgcgctccctctttgcc  
Cgtaagttgaaaagacttccctctgcgctccctctttgcc

consensus

CCAATGGCAGCATCTACTTCTCCgtaagttgaaaagacttccctctgcgctccctctttgcc

---

# I. Yellow-throated sandgrouse (No. 48), exon 1, WGS data

- CAP3 alignment of WGS data spanning exon 1 (uppercase letters)

```

.      :      :      :      :      :      :      :
SRR959570.27243122.2-   gtatcagcaagactcagaaactgccgtggtcctgttgA
SRR959570.83928202.2+   gtatcagcaagactcagaaactgacgtggtcctgttgA
SRR959570.77484672.1+   gtatcagcaagactcagaaactgccgtggtcctgttgAT
SRR959570.70261024.2-   gtatcagcaagactcagaaactgccgtggtcctgttgATGA
SRR959569.58422157.1-   gtatcagcaagactcagaaactgccgtggtcctgttgATGATG
SRR959570.81822031.2+   gtatcagcaagactcagaaactgccgtggtcctgttgATGATGGCAG
SRR959570.23954372.1-   gtatcagcaagactcagaaactgccgtggtcctgttgATGATGGCAGTTG
SRR959570.79408794.2-   gtatcagcaagactcagaaactgccgtggtcctgttgATGATGGCAGTTG
SRR959570.96342072.2-   gtatcagcaagactcagaaactgccgtggtcctgttgATGATGGCAGTTGTCTTCT
SRR959569.6612332.2+   gtatcagcaagactcagaaactgccgtggtcctgttgATGATGGCAGTTGTCTTCTCA
SRR959569.35456521.1-   gtatcagcaagactcagaaactgccgtggtcctgttgATGATGGCAGTTGTCTTCTCAA
SRR959570.40418354.1+   gtatcagcaagactcagaaactgccgtggtcctgttgATGATGGCAGTTGTCTTCTCAA
SRR959569.108977722.1-   gtatcagcaagactcagaaactgccgtggtcctgttgATGATGGCAGTTGTCTTCTCAAG
SRR959569.115141092.1-   gtatcagcaagactcagaaactgccgtggtcctgttgATGATGGCAGTTGTCTTCTCAAG
SRR959569.26703424.2-   gtatcagcaagactcagaaactgccgtggtcctgttgATGATGGCAGTTGTCTTCTCAAG
SRR959569.31567924.1+   gtatcagcaagactcagaaactgctggtgctcctgttgATGATGGCAGTTGTCTTCTCAAG
SRR959569.46846859.1-   gtatcagcaagactcagaaactgccgtggtcctgttgATGATGGCAGTTGTCTTCTCAAG
SRR959569.70471046.2-   gtatcagcaagactcagaaactgccgtggtcctgttgATGATGGCAGTTGTCTTCTCAAG
SRR959569.72650966.1+   gtatcagcaagactcagaaactgccgtggtcctgttgATGATGGCAGTTGTCTTCTCAAG
SRR959569.88034369.1-   gtatcagcaagactcagaaactgccgtggtcctgttgATGATGGCAGTTGTCTTCTCAAG
SRR959570.30788134.1+   gtatcagcaagactcagaaactgccgtggtcctgttgATGATGGCAGTTGTCTTCTCAAG
SRR959570.31408696.1+   gtatcagcaagactcagaaactgccgtggtcctgttgATGATGGCAGTTGTCTTCTCAAG
SRR959570.41706938.1-   gtatcagcaagactcagaaactgccgtggtcctgttgATGATGGCAGTTGTCTTCTCAAG
SRR959570.62371452.2-   gtatcagcaagactcagaaactgccgtggtcctgttgATGATGGCAGTTGTCTTCTCAAG
SRR959570.77329700.1-   gtatcagcaagactcagaaactgccgtggtcctgttgATGATGGCAGTTGTCTTCTCAAG
SRR959570.78563097.1-   gtatccacaagactcagaaactgccgtggtcctgttgATGATGGCAGTTGTCTTCTCAAG
SRR959570.84201608.2+   gtatcagcaagactcagaaactgccgtggtcctgttgATGATGGCAGTTGTCTTCTCAAG
SRR959569.89081045.1+   gtatcagcaagactcagaaactgccgtggtcctgttgATGATGGCAGTTGGCTTCTCAAG
SRR959569.36617306.2-   cagcaagactcagaaactgccgtggtcctgttgATGATGGCAGTTGTCTTCTCAAG
SRR959570.23791432.2+   cagcaagactcagaaactgccgtggtcctgttgATGATGGCAGTTGTCTTCTCAAG
SRR959569.92007559.2-   agcaagactcagaaactgccgtggtcctgttgATGATGGCAGTTGTCTTCTCAAG
SRR959569.33378889.1-   actcagaaactgccgtggtcctgttgATGATGGCAGTTGTCTTCTCAAG
SRR959570.74269683.1+   aactgccgtggtcctgttgATGATGGCAGTTGTCTTCTCAAG
SRR959569.111712080.2-   ctgccgtggtcctgttgATGATGGCAGTTGTCTTCTCAAG
SRR959569.21591540.2-   cgtggtcctgttgATGATGGCAGTTGTCTTCTCAAG
SRR959569.22505139.2+   ctgttgATGATGGCAGTTGTCTTCTCAAG
SRR959570.67053970.2+   tgttgATGATGGCAGTTGTCTTCTCAAG
SRR959569.66350666.2+   tgATGATGGCAGTTGTCTTCTCAAG
SRR959569.81857411.2+   gATGATGGCAGTTGTCTTCTCAAG
SRR959570.45570120.2+   ATGATGGCAGTTGTCTTCTCAAG
SRR959570.58913007.1+   ATGGCAGTTGTCTTCTCAAG
SRR959570.67297812.2+   GTTGTCTTCTCAAG
SRR959569.41410579.1-   TTCTCAAG
SRR959569.90980180.1+   TCTCAAG
SRR959569.23996698.2+   AAG
SRR959570.43058119.1-   AG
SRR959570.48604510.2-   AG
SRR959569.50804322.2+   G

```

consensus gtatcagcaagactcagaaactgccgtggtcctgttgATGATGGCAGTTGTCTTCTCAAG

```

.      :      :      :      :      :      :      :
SRR959569.88034369.1-   AACCA
SRR959569.31567924.1+   AAACAAGGGTA
SRR959570.77329700.1-   AACCAAGGGTATG
SRR959570.78563097.1-   AACCAAGGGTATGCT
SRR959570.89081045.1+   AAACAAGGGTATGCTCTTCT
SRR959570.30788134.1+   AACCAAGGGTATGCTCTTCT
SRR959570.62371452.2-   AACCAAGGGTATGCTCTTCTCTTCTCTTCT
SRR959570.31408696.1+   AACCAAGGGTATGCTCTTACTCTTCTTCT
SRR959570.41706938.1-   AACCAAGGGTATGCTCTTCTCTTCTTCTCTTCT
SRR959569.26703424.2-   AACCAAGGGTATGCTCTCTCTCTTCTTCTCTCTCT
SRR959569.70471046.2-   AACCAAGGGTATGCTCTTCTCTTCTTCTCTCTCT
SRR959569.46846859.1-   AACCAAGGGTATGCTCTTCTCTTCTTCTCTCTCT
SRR959569.108977722.1-   AACCAAGGGTATGCTCTTCTCTTCTTCTCTCTCT
SRR959570.84201608.2+   AACCAAGGGTATGCTCTTCTCTTCTTCTCTCTCT
SRR959569.115141092.1-   AACCAAGGGTATGCTCTTCTCTTCTTCTCTCTCT
SRR959569.36617306.2-   AACCAAGGGTATGCTCTTCTCTTCTTCTCTCTCT
SRR959570.23791432.2+   AACCAAGGGTATGCTCTTCTCTTCTTCTCTCTCT
SRR959569.92007559.2-   AACCAAGGGTATGCTCTTCTCTTCTTCTCTCTCT
SRR959569.33378889.1-   AACCAAGGGTATGCTCTTCTCTTCTTCTCTCTCT
SRR959570.74269683.1+   AACCAAGGGTATGCTCTTCTCTTCTTCTCTCTCT
SRR959569.111712080.2-   AACCAAGGGTATGCTCTTCTCTTCTTCTCTCTCT
SRR959569.21591540.2-   AACCAAGGGTATGCTCTTCTCTTCTTCTCTCTCT
SRR959569.22505139.2+   AACCAAGGGTATGCTCTTCTCTTCTTCTCTCTCT

```

SRR959569.23996698.2+ AACCAAGGGTATGCTCTTCTCTTTCTCCCCATGCTTTTATTATGATCAGCCTGCAACT  
SRR959569.41410579.1- AACCAAGGGTATGCTCTTCTCTTTTCTCCCCATGCTTTTATTATGATCAGCCTGCAACT  
SRR959569.50804322.2+ AACCAAGGGTATGCTCTTCTCTTTTCTCCCCATGCTTTTATTATGATCAGCCTGCAACT  
SRR959569.66350666.2+ AACCAAGGGTATGCTCTTCTCTTTTCTCCCCATGCTTTTATTATGATCAGCCTGCAACT  
SRR959569.81857411.2+ AACCAAGGGTATGCTCTTCTCTTTTCTCCCCATGCTTTTATTATGATCAGCCTGCAACT  
SRR959569.90980180.1+ AACCAAGGGTATGCTCTTCTCTTTTCTCCCCATGCTTTTATTATGATCAGCCTGCAACT  
SRR959570.43058119.1- AACCAAGGGTATGCTCTTCTCTTTTCTCCCCATGCTTTTATTATGATCAGCCTGCAACT  
SRR959570.45570120.2+ AACCAAGGGTATGCTCTTCTCTTTTCTCCCCATGCTTTTATTATGATCAGCCTGCAACT  
SRR959570.48604510.2- AACCAAGGGTATGCTCTTCTCTTTTCTCCCCATGCTTTTATTATGATCAGCCTGCAACT  
SRR959570.58913007.1+ AACCAAGGGTATGCTCTTCTCTTTTCTCCCCATGCTTTTATTATGATCAGCCTGCAACT  
SRR959570.67053970.2+ AACCAAGGGTATGCTCTTCTCTTTTCTCCCCATGCTTTTATTATGATCAGCCTGCAACT  
SRR959570.67297812.2+ AACCAAGGGTATGCTCTTCTCTTTTCTCCCCATGCTTTTATTATGATCAGCCTGCAACT  
SRR959569.60776346.2- AACCAAGGGTATGCTCTTCTCTTTTCTCCCCATGCTTTTATTATGATCAGCCTGCAACT  
SRR959569.70618318.1+ ATGCTCTTCTCTTTTCTCCCCATGCTTTTATTATGATCAGCCTGCAACT  
SRR959570.81105272.1- CTTTTCTCCCCATGCTTTTATTAGGATCAGCCTGCAACT  
SRR959569.53622134.2- TTTCTCCCCATGCTTTTATTATGATCAGCCTGCAACT  
SRR959569.83569668.1- TCCCCATGCTTTTATTATGATCAGCCTGCAACT  
SRR959569.83588450.2+ CCCCATGCTTTTATTATGATCAGCCTGCAACT  
SRR959569.3519785.1+ GCTTTTATTATGATCAGCCTGCAACT  
SRR959569.78006194.2+ GCTTTTATTATGATCAGCCTGCAACT  
SRR959569.39372777.1+ CTTTTATTATGATCAGCCTGCAACT  
SRR959570.51090830.1+ CTTTTATTATGATCAGCCTGCAACT  
SRR959569.57069922.1- TATTATGATCAGCCTGCAACT  
SRR959569.1601221.1+ TATGATCAGCCTGCAACT  
SRR959569.71807934.1- TGATCAGCCTGCAACT  
SRR959570.55820506.1+ ATCAGCCTGCAACT  
SRR959569.54283800.1- TCAGCCTGCAACT  
SRR959570.8382473.1+ CCTGCAACT  
SRR959569.8323748.2- CTGCAACT  
SRR959569.59129649.1- TGACACT  
SRR959570.88689336.1+ AACT  
SRR959569.77647544.1- T

consensus

AACCAAGGGTATGCTCTTCTCTTTTCTCCCCATGCTTTTATTATGATCAGCCTGCAACT

. : . : . : . : . : . :  
SRR959569.21591540.2- CCAT  
SRR959569.22505139.2+ CCATAGCTGCG  
SRR959570.67053970.2+ CCATAGCTGCGT  
SRR959569.66350666.2+ CCATAGCTGCGTTTC  
SRR959569.81857411.2+ CCATAGCTGCGTTTTCT  
SRR959570.45570120.2+ CCATAGCTGCGTTTTCTC  
SRR959570.58913007.1+ CCATAGCTGCGTTTTCTCCAT  
SRR959570.67297812.2+ CCATAGCTGCGTTTTCTCCATCTTCTC  
SRR959569.41410579.1- CCATAGCTGCGTTTTCTCCATCTTCTGGATCC  
SRR959569.90980180.1+ CCATAGCTGCGTTTTCTCCATCTTCTGGATCCT  
SRR959569.23996698.2+ CCATAGCTGCGTTTTCTCCATCTTCTGGATCCTTCAA  
SRR959570.43058119.1- CCATAGCTGCGTTTTCTCCATCTTCTGGATCCTTCAA  
SRR959570.48604510.2- CCATAGCTGCGTTTTCTCCATCTTCTGGATCCTTCAA  
SRR959569.50804322.2+ CCATAGCTGCGTTTTCTCCATCTTCTGGATCCTTCAAAC  
SRR959569.60776346.2- CCATAGCTGCGTTTTCTCCATCTTCTGGATCCTTCAAACAT  
SRR959569.70618318.1+ CCATAGCTGCGTTTTCTCCATCTTCTGGATCCTTCAAACATGGTCTACCT  
SRR959569.1601221.1+ CCATAGCTGCGTTTTCTCCATCTTCTGGATCCTTCAAACATGGTCTACCTCCGCTGGGAC  
SRR959569.3519785.1+ CCATAGCTGCGTTTTCTCCATCTTCTGGATCCTTCAAACATGGTCTACCTCCGCTGGGAC  
SRR959569.39372777.1+ CCATAGCTGCGTTTTCTCCATCTTCTGGATCCTTCAAACATGGTCTACCTCCGCTGGGAC  
SRR959569.54283800.1- CCATAGCTGCGTTTTCTCCATCTTCTGGATCCTTCAAACATGGTCTACCTCCGCTGGGAC  
SRR959569.57069922.1- CCATAGCTGCGTTTTCTCCATCTTCTGGATCCTTCAAACATGGTCTACCTCCGCTGGGAC  
SRR959569.59129649.1- CCATAGCTGCGTTTTCTCCATCTTCTGGATCCTTCAAACATGGTCTACCTCCGCTGGGAC  
SRR959570.71807934.1- CCATAGCTGCGTTTTCTCCATCTTCTGGATCCTTCAAACATGGTCTACCTCCGCTGGGAC  
SRR959569.77647544.1- CCATAGCTGCGTTTTCTCCATCTTCTGGATCCTTCAAACATGGTCTACCTCCGCTGGGAC  
SRR959569.78006194.2+ CCATAGCTGCGTTTTCTCCATCTTCTGGATCCTTCAAACATGGTCTACCTCCGCTGGGAC  
SRR959569.8323748.2- CCATAGCTGCGTTTTCTCCATCTTCTGGATCCTTCAAACATGGTCTACCTCCGCTGGGAC  
SRR959569.83569668.1- CCATAGCTGCGTTTTCTCCATCTTCTGGATCCTTCAAACATGGTCTACCTCCGCTGGGAC  
SRR959569.83588450.2+ CCATAGCTGCGTTTTCTCCATCTTCTGGATCCTTCAAACATGGTCTACCTCCGCTGGGAC  
SRR959570.51090830.1+ CCATAGCTGCGTTTTCTCCATCTTCTGGATCCTTCAAACATGGTCTACCTCCGCTGGGAC  
SRR959570.55820506.1+ CCATAGCTGCGTTTTCTCCATCTTCTGGATCCTTCAAACATGGTCTACCTCCGCTGGGAC  
SRR959570.81105272.1- CCATAGCTGCGTTTTCTCCATCTTCTGGATCCTTCAAACATGGTCTACCTCCGCTGGGAC  
SRR959570.8382473.1+ CCATAGCTGCGTTTTCTCCATCTTCTGGATCCTTCAAACATGGTCTACCTCCGCTGGGAC  
SRR959570.88689336.1+ CCATAGCTGCGTTTTCTCCATCTTCTGGATCCTTCAAACATGGTCTACCTCCGCTGGGAC  
SRR959569.64452302.2+ TAGCTGCGTTTTCTCCATCTTCTGGATCCTTCAAACATGGTCTACCTCCGCTGGGAC  
SRR959570.34914624.2+ AGCTGCGTTTTCTCCATCTTCTGGATCCTTCAAACATGGTCTACCTCCGCTGGGAC  
SRR959569.15507308.1+ GCTGCGTTTTCTCCATCTTCTGGATCCTTCAAACATGGTCTACCTCCGCTGGGAC  
SRR959569.91265373.1- CGTTTTCTCCATCTTCTGGATCCTTCAAACATGGTCTACCTCCGCTGGGAC  
SRR959569.50076958.1- TTTCTCCATCTTCTGGATCCTTCAAACATGGTCTACCTCCGCTGGGAC  
SRR959569.96465996.1+ TTTCTCCATCTTCTGGATCCTTCAAACATGGTCTACCTCCGCTGGGAC  
SRR959570.70417815.2- CATCTTCTGGATCCTTCAAACATGGTCTACCTCCGCTGGGAC  
SRR959570.86361899.2- CAAACATGGTCTACCTCCGCTGGGAC  
SRR959569.109876129.2+ AAACATGGTCTACCTCCGCTGGGAC  
SRR959569.37871094.2- GTCTACCTCCGCTGGGAC  
SRR959569.34552194.2+ CCGCTGGGAC  
SRR959569.37295845.2- TGGGCC  
SRR959569.111383851.2+ GGGAC  
SRR959569.11381534.2- GGAC



SRR959569.69829492.1-  
SRR959570.81175104.2+  
SRR959569.8173288.2+

GGTGTCTTC  
TCTTC  
C

consensus

TTTGGATTACGCCCTCACGGAGAATTGCCTGGATCTGATACTGTGATAGGAGGTGTCTTC

SRR959569.102843663.1+  
SRR959570.65746827.1-  
SRR959570.96704518.1-  
SRR959570.55184012.1-  
SRR959570.83592428.1-  
SRR959569.62074445.2-  
SRR959569.103091153.1-  
SRR959569.91923741.1-  
SRR959570.25763169.2+  
SRR959570.96400377.1-  
SRR959570.74431605.2+  
SRR959569.81204863.2-  
SRR959569.40343999.2+  
SRR959569.10170699.2+  
SRR959569.109491793.2-  
SRR959569.115941289.1+  
SRR959569.14787473.2-  
SRR959569.62656636.1-  
SRR959569.69829492.1-  
SRR959569.8173288.2+  
SRR959569.88589827.2+  
SRR959570.41687226.1-  
SRR959570.81175104.2+  
SRR959570.19393360.1+  
SRR959570.19212778.2-  
SRR959570.77680066.1+  
SRR959569.6612332.1-  
SRR959570.23791432.1-  
SRR959570.22341937.1-  
SRR959570.81919161.1-  
SRR959569.20978526.2+  
SRR959570.28579282.2-

. : . : . : . : . :  
CC  
CCAA  
CCAAA  
CCAAATA  
CCAAATA  
CCAAATAGCAGCA  
CCAAATAGCAGCATCTACTTCTCTgtaagct  
CCAAATGGCAGCGTCTACTTCTCTgtaagctg  
CCAAATAGCAGCATCTACTTCTCTgtaagctgaaaaaact  
CCAAATAGCAGCATCTACTTCTCTgtaagctgaaaaaactt  
CCAAATAGCAGCATCTACTTCTCTgtaagctgaaaaaacttc  
CCAAATAGCAGCATCTACTTCTCTgtaagctgaaaaaacttcctctgca  
CCAAATAGCAGCATCTACTTCTCTgtaagctgaaaaaacttcctctgcatcctctttt  
CCAAATAGCAGCATCTACTTCTCTgtaagctgaaaaaacttcctctgcatcctcttttac  
CCAAATAGCAGCGTCTACTTCTCTgtaagctgaaaaaacttcctctgcatcctcttttac  
CCAAATAGCAGCGTCTACTTCTCTgtaagctgaaaaaacttcctctgcatcctcttttac  
CCAAATAGCAGCGTCTACTTCTCTgtaagctgaaaaaacttcctctgcatcctcttttac  
CCAAATAGCAGCGTCTACTTCTCTgtaagctgaaaaaacttcctctgcatcctcttttac  
CCAAATAGCAGCGTCTACTTCTCTgtaagctgaaaaaacttcctctgcatcctcttttac  
CCAAATAGCAGCGTCTACTTCTCTgtaagctgaaaaaacttcctctgcatcctcttttac  
TAGCAGCATCTACTTCTCTgtaagctgaaaaaacttcctctgcatcctcttttac  
GCAGCATCTACTTCTCTgtaagctgaaaaaacttcctctgcatcctcttttac  
CAGCATCTACTTCTCTgtaagctgaaaaaacttcctctgcatcctcttttac  
CTACTTCTCTgtaagctgaaaaaacttcctctgcatcctcttttac  
ACTTCTCTgtaagctgaaaaaacttcctctgcatcctcttttac  
TTCTCTgtaagctgaaagaacttcctctgcatcctcttttac  
CTCTgtaagctgaaaaaacttcctctgcatcctcttttac  
TCTgtaagctgaaaaaacttcctctgcatcctcttttac  
CTgtaacctgaaaaaacttcctctgcatcctcttttac

consensus

CCAAATAGCAGCATCTACTTCTCTgtaagctgaaaaaacttcctctgcatcctcttttac

# J. Little egret (No. 36), exon 3, WGS data

- CAP3 alignment of WGS data spanning exon 3 (uppercase letters)

. : . : . : . : . : . :  
SRR1144868.67845280.1+ gaataaaggagaggtttccaggaatgttcccattactgA  
SRR1144872.17734476.2+ gaataaaggagaggtttccagtgaatgttcccattactgA  
SRR1144879.33672987.2+ gaataaaggagaggtttccagtgaatgttcccattactgA  
SRR1144879.5160460.1+ gaataaaggagaggtttccagtgaatgttcccattactgA  
SRR1144879.61692482.1+ gaataaaggagaggtttccagtgaatgttcccattactgA  
SRR1144872.33824599.2- gaataaaggagaggtttccagtgaatgttcccattactgAT  
SRR1144871.41481488.2- gaataaaggagaggtttccagtgaatgttcccattactgATG  
SRR1144870.72294457.1- gaataaaggagaggtttccagtgaatgttcccattactgATGGA  
SRR1144871.8299377.2- gaataaaggagaggtttccagtgaatgttcccattactgATGGA  
SRR1144877.33448080.1+ gaataaaggagaggtttccagtgaatgttcccattactgATGGA  
SRR1144870.9639987.1- gaataaaggagaggtttccagtgaatgttcccattactgATGGATA  
SRR1144872.16363319.1- gaataaaggagaggtttccagtgaatgttcccattactgATGGATAC  
SRR1144872.4813573.1+ gaataaaggagaggtttccagtgaatgttcccattactgATGGATAC  
SRR1144878.41746520.1- gaataaaggagaggtttccagtgaatgttcccattactgATGGATAC  
SRR1144879.62324334.1- gaataaaggagaggtttccagtgaatgttcccattactgATGGATACA  
SRR1144872.45335912.1+ gaataaaggagaggtttccagtgaatgttcccattactgATGGATACAG  
SRR1144869.30903186.1+ gaataaaggagaggtttccagtgaatgttcccattactgATGGATACAGC  
SRR1144870.17119836.1+ gaataaaggagaggtttccagtgaatgttcccattactgATGGATACAGCAC  
SRR1144870.60844810.1- gaataaaggagaggtttccagtgaatgttcccattactgATGGATACAGCACACTTC  
SRR1144869.67771093.2- gaataaaggagaggtttccagtgaatgttcccattactgATGGATACAGCACACTTCA  
SRR1144870.31792783.1+ gaataaaggagaggtttccagtgaatgttcccattactgATGGATACAGCACACTTCA  
SRR1144868.59303752.1- gaataaaggagaggtttccagtgaatgttcccattactgATGGATACAGCACACTTCATTA  
SRR1144868.60702162.1+ gaataaaggagaggtttccagtgaatgttcccattactgATGGATACAGGACACTTCATTA  
SRR1144868.65264933.1+ gaataaaggagaggtttccagtgaatgttcccattactgATGGATACAGCACACTTCATTA  
SRR1144868.66155008.1- gaataaaggagaggtttccagtgaatgttcccattactgATGGATACAGCACACTTCATTA  
SRR1144868.66155189.1- gaataaaggagaggtttccagtgaatgttcccattactgATGGATACAGCACACTTCATTA  
SRR1144869.49970874.2+ gaataaaggagaggtttccagtgaatgttcccattactgATGGATACAGCACACTTCATTA  
SRR1144869.52571317.2- gaataaaggagaggtttccagtgaatgttcccattactgATGGATACAGCACACTTCATTA  
SRR1144869.54065919.1+ gaataaaggagaggtttccagtgaatgttcccattactgATGGATACAGCACACTTCCTTA  
SRR1144869.54605399.2- taataaaggagaggtttccagtgaatgttcccattactgATGGATACAGCACACTTCATTA  
SRR1144870.13423647.1- gaataaaggagaggtttccagtgaatgttcccattactgATGGATACAGCACACTTCATTA  
SRR1144870.17119836.2- gaataaaggagaggtttccagtgaatgttcccattactgATGGATACAGCACACTTCATTA  
SRR1144870.47046512.2- gaataaaggagaggtttccagtgaatgttcccattactgATGGATACAGCACACTTCATTA  
SRR1144870.73811889.2+ gaataaaggagaggtttccagtgaatgttcccattactgATGGATACAGCACACTTCATTA  
SRR1144871.38837713.2- gaataaaggagaggtttccagtgaatgttcccattactgATGGATACAGCACACTTCATTA  
SRR1144871.46921594.2+ gaataaaggagaggtttccagtgaatgttcccattactgATGGATACAGCACACTTCATTA  
SRR1144871.65469880.2+ gaataaaggagaggtttccagtgaatgttcccattactgATGGATACAGCACACTTCATTA  
SRR1144879.26392612.1+ ataaaggagaggtttccagtgaatgttcccattactgATGGATACAGCAC  
SRR1144879.30863984.1+ ataaaggagaggtttccagtgaatgttcccattactgATGGATACAGCAC  
SRR1144871.34797005.2+ ataaaggagaggtttccagtgaatgttcccattactgATGGATACAGCACACTTCATTA  
SRR1144868.49756615.2- aggagaggtttccagtgaatgttcccattactgATGGATACAGCACACTTCATTA  
SRR1144877.2549599.2+ ggagaggtttccagtgaatgttcccattactgATGGATACAGCACACTTC  
SRR1144878.29103724.1- gagaggtttccagtgaatgttcccattactgATGGATACAGCACACTTCA  
SRR1144869.41401888.1- gagaggtttccagtgaatgttcccattactgATGGATACAGCACACTTCATTA  
SRR1144869.41402035.1- gagaggtttccagtgaatgttcccattactgATGGATACAGCACACTTCATTA  
SRR1144870.6652156.1+ gagtttccagtgaatgttcccattactgATGGATACAGCACACTTCATTA  
SRR1144870.17469659.1+ agtttccagtgaatgttcccattactgATGGATACAGCACACTTCATTA  
SRR1144873.2442525.1+ agtttccagtgaatgttcccattactgATGGATACAGCACACTTCATTA  
SRR1144873.38918322.1+ agtttccagtgaatgttcccattactgATGGATACAGCACACTTCATTA  
SRR1144879.65691056.1+ agtttccagtgaatgttcccattactgATGGATACAGCACACTTCATTA  
SRR1144879.48553894.2- tttccagtgaatgttcccattactgATGGATACAGCACACTTCATTA  
SRR1144872.50503088.1- gtgaatgttcccattactgATGGATACAGCACACTTCATTA  
SRR1144877.27788866.2- gtgaatgttcccattactgATGGATACAGCACACTTCATTA  
SRR1144870.31792783.2- tgaatgttcccattactgATGGATACAGCACACTTCATTA  
SRR1144871.46921594.1- tgaatgttcccattactgATGGATACAGCACACTTCATTA  
SRR1144877.14750144.2- tgaatgttcccattactgATGGATACAGCACACTTCATTA  
SRR1144871.31380950.1+ aatgttcccattactgATGGATACAGCACACTTCATTA  
SRR1144870.49105108.1+ gttcccattactgATGGATACAGCACACTTCATTA  
SRR1144877.9660172.2+ tcccattactgATGGATACAGCACACTTCATTA  
SRR1144869.12737898.1+ ccattactgATGGATACAGCACACTTCATTA  
SRR1144871.65469880.1- ccattactgATGGATACAGCACACTTCATTA  
SRR1144873.49970208.2- ccattactgATGGATACAGCACACTTCATTA  
SRR1144879.42389030.2- ccattactgATGGATACAGCACACTTCATTA  
SRR1144879.42389148.2- ccattactgATGGATACAGCACACTTCATTA  
SRR1144874.2179594.1- cttactgATGGATACAGCACACTTCATTA  
SRR1144874.2179688.1- cttactgATGGATACAGCACACTTCATTA  
SRR1144868.42978057.2- attactgATGGATACAGCACACTTCATTA  
SRR1144874.40029454.2- actgATGGATACAGCACACTTCATTA  
SRR1144880.40259839.1- actgATGGATACAGCACACTTCATTA  
SRR1144874.36764503.1+ gATGGATACAGCACACTTCATTA  
SRR1144878.19643713.2- ATGGATACAGCACACTTCATTA  
SRR1144871.3356165.2+ GGATACAGCACACTTCATTA  
SRR1144868.458086.2- GATACAGCACACTTCATTA  
SRR1144878.5309551.1- GATACAGCACACTTCATTA  
SRR1144869.61144136.2- ATACAGCACACTTCATTA

SRR1144868.10327791.1+ CAGCACACTTCATTA  
SRR1144877.61617793.1+ CAGCACACTTCATTA  
SRR1144869.4673946.1+ CACACTTCATTA  
SRR1144869.16891662.2+ ACTTCATTA  
SRR1144872.11063924.2+ ACTTCATTA  
SRR1144868.84620699.2+ TTCATTA  
SRR1144878.42694301.1- TTCATTA  
SRR1144869.80255173.2- TCATTA  
SRR1144879.15009515.2+ CATTA  
SRR1144879.50959999.2+ CATTA  
SRR1144875.16266660.2- ATTA  
SRR1144875.1937562.2- ATTA  
SRR1144875.35369155.2- ATTA  
SRR1144875.53033606.2- ATTA  
SRR1144875.54444743.2- ATTA  
SRR1144880.41591542.2- ATTA  
SRR1144880.50830648.2- ATTA  
SRR1144880.55477883.2- ATTA  
SRR1144880.70110649.2- ATTA  
SRR1144880.71079675.2- ATTA  
SRR1144874.11322088.2- TA  
SRR1144878.5996325.2+ A

consensus gaataaaggagagatttccagtgaaatgttcccattactgATGGATACAGCACACTTCATTA

. : . : . : . : . : . :  
SRR1144879.48553894.2- CT  
SRR1144868.60702162.1+ CTG  
SRR1144871.38837713.2- CTGCC  
SRR1144869.49970874.2+ CTGCCT  
SRR1144869.52571317.2- CTGCCT  
SRR1144869.54065919.1+ CTGCCT  
SRR1144872.50503088.1- CTGCCTTT  
SRR1144877.27788866.2- CTGCCTTT  
SRR1144870.13423647.1- CTGCCTTTG  
SRR1144877.14750144.2- CTGCCTTTG  
SRR1144871.65469880.2+ CTGCCTTTGGTA  
SRR1144868.65264933.1+ CTGCCTTTGGTAC  
SRR1144877.9660172.2+ CTGCCTTTGGTACTTA  
SRR1144874.2179594.1- CTGCCTTTGGTACTTAT  
SRR1144874.2179688.1- CTGCCTTTGGTACTTAT  
SRR1144873.49970208.2- CTGCCTTTGGTACTTATG  
SRR1144879.42389030.2- CTGCCTTTGGTACTTATG  
SRR1144879.42389148.2- CTGCCTTTGGTACTTATG  
SRR1144874.40029454.2- CTGCCTTTGGTACTTATGACACA  
SRR1144880.40259839.1- CTGCCTTTGGTACTTATGACACA  
SRR1144874.36764503.1+ CTGCCTTTGGTACTTATGACACAGTC  
SRR1144870.73811889.2+ CTGCCTTTGGTACTTATGACACAGTCT  
SRR1144878.19643713.2- CTGCCTTTGGTACTTATGACACAGTCT  
SRR1144870.47046512.2- CTGCCTTTGGTACTTATGACACAGTCTA  
SRR1144878.5309551.1- CTGCCTTTGGTACTTATGACACAGTCTAAT  
SRR1144869.54605399.2- CTGCCTTTGGTACTTATGACACAGTCTAATT  
SRR1144877.61617793.1+ CTGCCTTTGGTACTTATGACACAGTCTAATTCTT  
SRR1144870.17119836.2- CTGCCTTTGGTACTTATGACACAGTCTAATTCTTT  
SRR1144868.59303752.1- CTGCCTTTGGTACTTATGACACAGTCTAATTCTTTA  
SRR1144868.66155008.1- CTGCCTTTGGTACTTATGACACAGTCTAATTCTTTA  
SRR1144868.66155189.1- CTGCCTTTGGTACTTATGACACAGTCTAATTCTTTA  
SRR1144872.11063924.2+ CTGCCTTTGGTACTTATGACACAGTCTAATTCTTTAAAGG  
SRR1144871.34797005.2+ CTGCCTTTGGTACTTATGACACAGTCTAATTCTTTAAAGGCC  
SRR1144878.42694301.1- CTGCCTTTGGTACTTATGACACAGTCTAATTCTTTAAAGGCC  
SRR1144879.15009515.2+ CTGCCTTTGGTACTTATGACACAGTCTAATTCTTTAAAGGCCAA  
SRR1144879.50959999.2+ CTGCCTTTGGTACTTATGACACAGTCTAATTCTTTAAAGGCCAA  
SRR1144875.16266660.2- CTGCCTTTGGTACTTATGACACAGTCTAATTCTTTAAAGGCCAAA  
SRR1144875.1937562.2- CTGCCTTTGGTACTTATGACACAGTCTAATTCTTTAAAGGCCAAA  
SRR1144875.35369155.2- CTGCCTTTGGTACTTATGACACAGTCTAATTCTTTAAAGGCCAAA  
SRR1144875.53033606.2- CTGCCTTTGGTACTTATGACACAGTCTAATTCTTTAAAGGCCAAA  
SRR1144875.54444743.2- CTGCCTTTGGTACTTATGACACAGTCTAATTCTTTAAAGGCCAAA  
SRR1144880.41591542.2- CTGCCTTTGGTACTTATGACACAGTCTAATTCTTTAAAGGCCAAA  
SRR1144880.50830648.2- CTGCCTTTGGTACTTATGACACAGTCTAATTCTTTAAAGGCCAAA  
SRR1144880.55477883.2- CTGCCTTTGGTACTTATGACACAGTCTAATTCTTTAAAGGCCAAA  
SRR1144880.70110649.2- CTGCCTTTGGTACTTATGACACAGTCTAATTCTTTAAAGGCCAAA  
SRR1144880.71079675.2- CTGCCTTTGGTACTTATGACACAGTCTAATTCTTTAAAGGCCAAA  
SRR1144868.49756615.2- CTGCCTTTGGTACTTATGACACAGTCTAATTCTTTAAAGGCCAAAG  
SRR1144874.11322088.2- CTGCCTTTGGTACTTATGACACAGTCTAATTCTTTAAAGGCCAAAGA  
SRR1144869.41401888.1- CTGCCTTTGGTACTTATGACACAGTCTAATTCTTTAAAGGCCAAAGAT  
SRR1144869.41402035.1- CTGCCTTTGGTACTTATGACACAGTCTAATTCTTTAAAGGCCAAAGAT  
SRR1144878.5996325.2+ CTGCCTTTGGTACTTATGACACAGTCTAATTCTTTAAAGGCCAAAGAT  
SRR1144873.8667254.1- CTGCCTTTGGTACTTATGACACAGTCTAATTCTTTAAAGGCCAAAGATT  
SRR1144879.52722640.1- CTGCCTTTGGTACTTATGACACAGTCTAATTCTTTAAAGGCCAAAGATT  
SRR1144870.6652156.1+ CTGCCTTTGGTACTTATGACACAGTCTAATTCTTTAAAGGCCAAAGATTT  
SRR1144870.17469659.1+ CTGCCTTTGGTACTTATGACACAGTCTAATTCTTTAAAGGCCAAAGATTTT  
SRR1144868.10327791.1+ CTGCCTTTGGTACTTATGACACAGTCTAATTCTTTAAAGGCCAAAGATTTTCTAAATGTC  
SRR1144868.42978057.2- CTGCCTTTGGTACTTATGACACAGTCTAATTCTTTAAAGGCCAAAGATTTTCTAAATGTC  
SRR1144868.458086.2- CTGCCTTTGGTACTTATGACACAGTCTAATTCTTTAAAGGCCAAAGATTTTCTAAATGTC

SRR1144868.84620699.2+ CTGCCTTTGGTACTTATGACACAGTCTAATTCTTTAAAGGCCAAAGATTTTCTAAATGTC  
SRR1144869.12737898.1+ CTGCCTTTGGTACTTATGACACAGTCTAATTCTTTAAAGGCCAAAGATTTTCTAAATGTC  
SRR1144869.16891662.2+ CTGCCTTTGGTACTTATGACACAGTCTAATTCTTTAAAGGCCAAAGATTTTCTAAATGTC  
SRR1144869.4673946.1+ CTGCCTTTGGTACTTATGACACAGTCTAATTCTTTAAAGGCCAAAGATTTTCTAAATGTC  
SRR1144869.61144136.2- CTGCCTTTGGTACTTATGACACAGTCTAATTCTTTAAAGGCCAAAGATTTTCTAAATGTC  
SRR1144869.80255173.2- CTGCCTTTGGTACTTATGACACAGTCTAATTCTTTAAAGGCCAAAGATTTTCTAAATGTC  
SRR1144870.31792783.2- CTGCCTTTGGTACTTATGACACAGTCTAATTCTTTAAAGGCCAAAGATTTTCTAAATGTC  
SRR1144870.49105108.1+ CTGCCTTTGGTACTTATGACACAGTCTAATTCTTTAAAGGCCAAAGATTTTCTAAATGTC  
SRR1144871.31380950.1+ CTGCCTTTGGTACTTATGACACAGTCTAATTCTTTAAAGGCCAAAGATTTTCTAAATGTC  
SRR1144871.3356165.2+ CTGCCTTTGGTACTTATGACACAGTCTAATTCTTTAAAGGCCAAAGATTTTCTAAATGTC  
SRR1144871.46921594.1- CTGCCTTTGGTACTTATGACACAGTCTAATTCTTTAAAGGCCAAAGATTTTCTAAATGTC  
SRR1144871.65469880.1- CTGCCTTTGGTACTTATGACACAGTCTAATTCTTTAAAGGCCAAAGATTTTCTAAATGTC  
SRR1144870.73811889.1- TGCCCTTTGGTACTTATGACACAGTCTAATTCTTTAAAGGCCAAAGATTTTCTAAATGTC  
SRR1144877.12192571.1- GCCTTTGGTACTTATGACACAGTCTAATTCTTTAAAGGCCAAAGATTTT  
SRR1144877.21784092.1- GCCTTTGGTACTTATGACACAGTCTAATTCTTTAAAGGCCAAAGATTTT  
SRR1144877.51862308.2- GCCTTTGGTACTTATGACACAGTCTAATTCTTTAAAGGCCAAAGATTTT  
SRR1144868.48380834.2+ GCCTTTGGTACTTATGACACAGTCTAATTCTTTAAAGGCCAAAGATTTTCTAAATGTC  
SRR1144869.76043902.1- TTTGGTACTTATGACACAGTCTAATTCTTTAAAGGCCAAAGATTTTCTAAATGTC  
SRR1144878.22835328.1- TGGTACTTATGACACAGTCTAATTCTTTAAAGGCCAAAGATTTTCTAAA  
SRR1144871.34797005.1- TGGTACTTATGACACAGTCTAATTCTTTAAAGGCCAAAGATTTTCTAAATGTC  
SRR1144872.55945135.2- TACTTATGACACAGTCTAATTCTTTAAAGGCCAAAGATTTTCTAAATGT  
SRR1144870.17469659.2- TACTTATGACACAGTCTAATTCTTTAAAGGCCAAAGATTTTCTAAATGTC  
SRR1144871.45966609.1+ ACTTATGACACAGTCTAATTCTTTAAAGGCCAAAGATTTTCTAAATGTC  
SRR1144870.5500488.1+ CTTATGACACAGTCTAATTCTTTAAAGGCCAAAGATTTTCTAAATGTC  
SRR1144868.44665655.2+ TTATGACACAGTCTAATTCTTTAAAGGCCAAAGATTTTCTAAATGTC  
SRR1144868.45671413.2+ ATGACACAGTCTAATTCTTTAAAGGCCAAAGATTTTCTAAATGTC  
SRR1144869.42749510.1- ATGACACAGTCTAATTCTTTAAAGGCCAAAGATTTTCTAAATGTC  
SRR1144871.55766386.2+ GACACAGTCTAATTCTTTAAAGGCCAAAGATTTTCTAAATGTC  
SRR1144872.43173285.1- GACACAGTCTAATTCTTTAAAGGCCAAAGATTTTCTAAATGTC  
SRR1144868.83667876.1- ACACAGTCTAATTCTTTAAAGGCCAAAGATTTTCTAAATGTC  
SRR1144868.54387690.1- ACAGTCTAATTCTTTAAAGGCCAAAGATTTTCTAAATGTC  
SRR1144868.85055638.2- ACAGTCTAATTCTTTAAAGGCCAAAGATTTTCTAAATGTC  
SRR1144868.85055836.2- ACAGTCTAATTCTTTAAAGGCCAAAGATTTTCTAAATGTC  
SRR1144868.21254686.2+ AGTCTAATTCTTTAAAGGCCAAAGATTTTCTAAATGTC  
SRR1144869.1009297.1+ AGTCTAATTCTTTAAAGGCCAAAGATTTTCTAAATGTC  
SRR1144870.61673725.1+ AGTCTAATTCTTTAAAGGCCAAAGATTTTCTAAATGTC  
SRR1144870.49105108.2- TCTAATTCTTTAAAGGCCAAAGATTTTCTAAATGTC  
SRR1144868.66301021.2- CTAATTCTTTAAAGGCCAAAGATTTTCTAAATGTC  
SRR1144877.19712880.1+ CTAATTCTTTAAAGGCCAAAGATTTTCTAAATGTC  
SRR1144870.30102722.1+ TAATTCTTTAAAGGCCAAAGATTTTCTAAATGTC  
SRR1144870.6652156.2- TAATTCTTTAAAGGCCAAAGATTTTCTAAATGTC  
SRR1144869.27597638.2- ATTCTTTAAAGGCCAAAGATTTTCTAAATGTC  
SRR1144874.24602974.1- ATTCTTTAAAGGCCAAAGATTTTCTAAATGTC  
SRR1144868.83942966.1- TTCTTTAAAGGCCAAAGATTTTCTAAATGTC  
SRR1144871.31380950.2- TTCTTTAAAGGCCAAAGATTTTCTAAATGTC  
SRR1144869.15441406.1+ TCTTTAAAGGCCAAAGATTTTCTAAATGTC  
SRR1144874.8194603.2- CTTTAAAGGCCAAAGATTTTCTAAATGTC  
SRR1144874.8194698.2- CTTTAAAGGCCAAAGATTTTCTAAATGTC  
SRR1144877.61006425.2- CTTTAAAGGCCAAAGATTTTCTAAATGTC  
SRR1144868.91567265.1+ TTTAAAGGCCAAAGATTTTCTAAATGTC  
SRR1144877.26008759.1+ TTTAAAGGCCAAAGATTTTCTAAATGTC  
SRR1144869.24285646.2- AAAGGCCAAAGATTTTCTAAATGTC  
SRR1144871.3356165.1- GGCCAAAGATTTTCTAAATGTC  
SRR1144873.17359866.2+ GGCCAAAGATTTTCTAAATGTC  
SRR1144879.28044694.2+ GGCCAAAGATTTTCTAAATGTC  
SRR1144868.62844636.2+ GCCAAAGATTTTCTAAATGTC  
SRR1144868.62844799.2+ GCCAAAGATTTTCTAAATGTC  
SRR1144873.11857326.2- CCAAAGATTTTCTAAATGTC  
SRR1144868.86292250.2+ CAAAGATTTTCTAAATGTC  
SRR1144869.24327444.2+ CAAAGATTTTCTAAATGTC  
SRR1144872.6794653.2+ CAAAGATTTTCTAAATGTC  
SRR1144870.41621984.1+ AAGATTTTCTAAATGTC  
SRR1144877.47335452.2+ GATTTTCTAAATGTC  
SRR1144868.21392135.1+ ATTTTCTAAATGTC  
SRR1144875.17272141.2+ ATTTTCTAAATGTC  
SRR1144875.30098371.2+ ATTTTCTAAATGTC  
SRR1144875.37177977.2+ ATTTTCTAAATGTC  
SRR1144875.50250662.2+ ATTTTCTAAATGTC  
SRR1144880.2237028.2+ ATTTTCTAAATGTC  
SRR1144880.26404853.2+ ATTTTCTAAATGTC  
SRR1144880.29707237.2+ ATTTTCTAAATGTC  
SRR1144880.29800802.2+ ATTTTCTAAATGTC  
SRR1144880.32757909.2+ ATTTTCTAAATGTC  
SRR1144880.60128894.2+ ATTTTCTAAATGTC  
SRR1144880.60483778.2+ ATTTTCTAAATGTC  
SRR1144880.66017923.2+ ATTTTCTAAATGTC  
SRR1144880.67814530.2+ ATTTTCTAAATGTC  
SRR1144880.69930905.2+ ATTTTCTAAATGTC  
SRR1144880.71524804.2+ ATTTTCTAAATGTC  
SRR1144869.70757485.2+ TTTTCTAAATGTC  
SRR1144877.14297928.1- TTCTAAATGTC  
SRR1144872.54085187.1+ TCTAAATGTC  
SRR1144879.33935846.1- CTAATGTC  
SRR1144879.51331996.1- CTAATGTC





SRR1144868.54387690.1- TTTTCTTGATGAGGTACAGAGGCCCATCTGACCCAAGTACCCCCAAAATAATCTTCACCT  
SRR1144868.62844636.2+ TTTTCTTGATGAGGTACAGAGGCCCATCTGACCCAAGTACCCCCAAAATAATCTTCACCT  
SRR1144868.62844799.2+ TTTTCTTGATGAGGTACAGAGGCCCATCTGACACAAGTACCCCCAAAATAATCTTCACCT  
SRR1144868.66301021.2- TTTTCTTGATGAGGTACAGAGGCCCATCTGACCCAAGTACCCCCAAAATAATCTTCACCT  
SRR1144868.83942966.1- TTTTCTTGATGAGGTACAGAGGCCCATCTGACCCAAGTACCTCAAATAATCTTCACCT  
SRR1144868.85055638.2- TTTTCTTGATGAGGTACAGAGGCCCATCTGACCCAAGTACCTCAAATAATCTTCACCT  
SRR1144868.85055836.2- TTTTCTTGATGAGGTACAGAGGCCCATCTGACCCAAGTACCTCAAATAATCTTCACCT  
SRR1144868.86292250.2+ TTTTCTTGATGAGGTACAGAGGCCCATCTGACCCAAGTACCCCCAAAATAATCTTCACCT  
SRR1144868.91567265.1+ TTTTCTTGATGAGGTACAGAGGCCCATCTGACCCAAGTACCCCCAAAATAATCTTCACCT  
SRR1144869.1009297.1+ TTTTCTTGATGAGGTACAGAGGCCCATCTGACCCAAGTACCTCAAATAATCTTCACCT  
SRR1144869.12072787.2- TTTTCTTGATGAGGTACAGAGGCCCATCTGACCCAAGTACCTCAAATAATCTTCACCT  
SRR1144869.15441406.1+ TTTTCTTGATGAGGTACAGAGGCCCATCTGACCCAAGTACCTCAAATAATCTTCACCT  
SRR1144869.24285646.2- TTTTCTTGATGAGGTACAGAGGCCCATCTGACCCAAGTACCCCCAAAATAATCTTCACCT  
SRR1144869.24327444.2+ TTTTCTTGATGAGGTACAGAGGCCCATCTGACCCAAGTACCTCAAATAATCTTCACCT  
SRR1144869.27597638.2- TTTTCTTGATGAGGTACAGAGGCCCATCTGACCCAAGTACCTCAAATAATCTTCACCT  
SRR1144869.63440671.2+ TTTTCTTGATGAGGTACAGAGGCCCATCTGACCCAAGTACCTCAAATAATCTTCACCT  
SRR1144869.64941349.1- TTTTCTTGATGAGGTACAGAGGCCCATCTGACCCAAGTACCCCCAAAATAATCTTCACCT  
SRR1144869.64941350.1- TTTTCTTGATGAGGTACAGAGGCCCATCTGACCCAAGTACCCCCAAAATAATCTTCACCT  
SRR1144869.70757485.2+ TTTTCTTGATGAGGTACAGAGGCCCATCTGACCCAAGTACCTCAAATAATCTTCACCT  
SRR1144870.30102722.1+ TTTTCTTGATGAGGTACAGAGGCCCATCTGACCCAAGTACCTCAAATAATCTTCACCT  
SRR1144870.41621984.1+ TTTTCTTGATGAGGTACAGAGGCCCATCTGACCCAAGTACCCCCAAAATAATCTTCACCT  
SRR1144870.49105108.2- TTTTCTTGATGAGGTACAGAGGCCCATCTGACCCAAGTACCTCAAATAATCTTCACCT  
SRR1144870.53925041.1+ TTTTCTTGATGAGGTACAGAGGCCCATCTGACCCAAGTACCCCCAAAATAATCTTCACCT  
SRR1144870.61673725.1+ TTTTCTTGATGAGGTACAGAGGCCCATCTGACCCAAGTACCTCAAATAATCTTCACCT  
SRR1144870.6652156.2- TTTTCTTGATGAGGTACAGAGGCCCATCTGACCCAAGTACCCCCAAAATAATCTTCACCT  
SRR1144871.31380950.2- TTTTCTTGATGAGGTACAGAGGCCCATCTGACCCAAGTACCCCCAAAATAATCTTCACCT  
SRR1144871.3356165.1- TTTTCTTGATGAGGTACAGAGGCCCATCTGACCCAAGTACCTCAAATAATCTTCACCT  
SRR1144871.71492114.2+ TTTTCTTGATGAGGTACAGAGGCCCATCTGACCCAAGTACCCCCAAAATAATCTTCACCT  
SRR1144874.8753005.1+ TTTTCTTGATGAGGTACAGAGGCCCATCTGACCCAAGTACCCCCAAAATA  
SRR1144869.43766655.1+ TTTTCTTGATGAGGTACAGAGGCCCATCTGACCCAAGTACCCCCAAAATAATCTTCACCT  
SRR1144869.63650894.1+ TTTTCTTGATGAGGTACAGAGGCCCATCTGACCCAAGTACCCCCAAAATAATCTTCACCT  
SRR1144869.8345878.2+ TTTTCTTGATGAGGTACAGAGGCCCATCTGACCCAAGTACCCCCAAAATAATCTTCACCT  
SRR1144878.32179812.1- CTTGATGAGGTACAGAGGCCCATCTGACCCAAGTACCCCCAAAATAATCTTCACCT  
SRR1144874.29736650.1- TGATGAGGTACAGAGGCCCATCTGACCCAAGTACCCCCAAAATAATCTTCACCT  
SRR1144877.17194435.1- TGATGAGGTACAGAGGCCCATCTGACCCAAGTACCCCCAAAATAATCTTCACCT  
SRR1144879.9178158.1+ TGATGAGGTACAGAGGCCCATCTGACCCAAGTACCCCCAAAATAATCTTCACCT  
SRR1144869.63616507.1- TGATGAGGTACAGAGGCCCATCTGACCCAAGTACCCCCAAAATAATCTTCACCT  
SRR1144879.44479633.1- ATGAGGTACAGAGGCCCATCTGACCCAAGTACCCCCAAAATAATCTTCACCT  
SRR1144879.62232076.1- ATGAGGTACAGAGGCCCATCTGACCCAAGTACCCCCAAAATAATCTTCACCT  
SRR1144871.35887586.1+ GAGGTACAGAGGCCCATCTGACCCAAGTACCCCCAAAATAATCTTCACCT  
SRR1144877.10728706.1+ GAGGTACAGAGGCCCATCTGACCCAAGTACCCCCAAAATAATCTTCACCT  
SRR1144871.45966609.2- AGGTACAGAGGCCCATCTGACCCAAGTACCCCCAAAATAATCTTCACCT  
SRR1144868.38943194.1+ GGTACAGAGGCCCATCTGACCCAAGTACCCCCAAAATAATCTTCACCT  
SRR1144868.50956912.1+ GGTACAGAGGCCCATCTGACCCAAGTACCCCCAAAATAATCTTCACCT  
SRR1144869.76334149.1- GTACAGAGGCCCATCTGACCCAAGTACCCCCAAAATAATCTTCACCT  
SRR1144869.76334150.1- GTACAGAGGCCCATCTGACCCAAGTACCCCCAAAATAATCTTCACCT  
SRR1144875.22303585.2- GTACAGAGGCCCATCTGACCCAAGTACCCCCAAAATAATCTTCACCT  
SRR1144875.9845596.2- GTACAGAGGCCCATCTGACCCAAGTACCCCCAAAATAATCTTCACCT  
SRR1144880.18641104.1+ GTACAGAGGCCCATCTGACCCAAGTACCCCCAAAATAATCTTCACCT  
SRR1144880.33661683.2- GTACAGAGGCCCATCTGACCCAAGTACCCCCAAAATAATCTTCACCT  
SRR1144880.34810606.1+ GTACAGAGGCCCATCTGACCCAAGTACCCCCAAAATAATCTTCACCT  
SRR1144880.38243217.1+ GTACAGAGGCCCATCTGACCCAAGTACCCCCAAAATAATCTTCACCT  
SRR1144880.70816288.2- GTACAGAGGCCCATCTGACCCAAGTACCCCCAAAATAATCTTCACCT  
SRR1144870.5500488.2- ACAGAGGCCCATCTGACCCAAGTACCTCAAATAATCTTCACCT  
SRR1144878.34264526.2- ACAGAGGCCCATCTGACCCAAGTACCTCAAATAATCTTCACCT  
SRR1144869.50380653.1+ AGAGGCCCATCTGACCCAAGTACCCCCAAAATAATCTTCACCT  
SRR1144868.90126106.1- GGCCCATCTGACCCAAGTACCTCAAATAATCTTCACCT  
SRR1144871.55766386.1- GGCCCATCTGACCCAAGTACCCCCAAAATAATCTTCACCT  
SRR1144877.33497325.1- CCCATCTGACCCAAGTACCTCAAATAATCTTCACCT  
SRR1144869.3270077.1+ CCATCTGACCCAAGTACCCCCAAAATAATCTTCACCT  
SRR1144869.3270217.1+ CCATCTGACCCAAGTACCCCCAAAATAATCTTCACCT  
SRR1144869.47784350.1- CCATCTGACCCAAGTACCTCAAATAATCTTCACCT  
SRR1144873.13545456.1- CATCTGACCCAAGTACCCCCAAAATAATCTTCACCT  
SRR1144873.37100088.1+ CATCTGACCCAAGTACCTCAAATAATCTTCACCT  
SRR1144879.54514274.1- CATCTGACCCAAGTACCCCCAAAATAATCTTCACCT  
SRR1144879.55281172.1- CATCTGACCCAAGTACCCCCAAAATAATCTTCACCT  
SRR1144879.55281281.1- CATCTGACCCAAGTACCCCCAAAATAATCTTCACCT  
SRR1144868.25258814.1- ATCTGACCCAAGTACCTCAAATAATCTTCACCT  
SRR1144868.92408075.1- ATCTGACCCAAGTACCCCCAAAATAATCTTCACCT  
SRR1144868.92408258.1- ATCTGACCCAAGTACCCCCAAAATAATCTTCACCT  
SRR1144878.1843122.1- CTGACCCAAGTACCCCCAAAATAATCTTCACCT  
SRR1144878.48127341.1- CTGACCCAAGTACCCCCAAAATAATCTTCACCT  
SRR1144879.14521809.2+ TGACCCAAGTACCCCCAAAATAATCTTCACCT  
SRR1144879.59056380.2+ TGACCCAAGTACCCCCAAAATAATCTTCACCT  
SRR1144874.20419677.1- GACCCAAGTACCCCCAAAATAATCTTCACCT  
SRR1144870.61673725.2- CAACTGACCTCAAATAATCTTCACCT  
SRR1144873.7791113.1- CAACTGACCTCAAATAATCTTCACCT  
SRR1144877.66914433.1+ ACTGACCCCCAAAATAATCTTCACCT  
SRR1144870.30102722.2- TGACCTCAAATAATCTTCACCT  
SRR1144873.24496541.1- TGACCCCCAAAATAATCTTCACCT  
SRR1144873.38386793.2- TGACCCCCAAAATAATCTTCACCT  
SRR1144873.9300436.1- TGACCCCCAAAATAATCTTCACCT  
SRR1144877.44248084.2+ TGACCTCAAATAATCTTCACCT  
SRR1144879.46848275.2- TGACCCCCAAAATAATCTTCACCT

SRR1144879.48882587.1-  
SRR1144879.8450688.2-  
SRR1144873.10372297.2+  
SRR1144868.40331692.2-  
SRR1144869.7266474.2-  
SRR1144872.54542593.2-  
SRR1144878.57144785.2+  
SRR1144870.41621984.2-  
SRR1144879.25392406.1+  
SRR1144879.26982715.2-  
SRR1144868.93193558.2+  
SRR1144870.63521823.1+  
SRR1144870.59632527.1+  
SRR1144877.30797025.1+  
SRR1144877.34278009.1+  
SRR1144872.1082717.1+  
SRR1144869.4662147.2-  
SRR1144869.39444143.1-  
SRR1144877.66940950.1-  
SRR1144870.2992437.2+  
SRR1144870.53925041.2-  
SRR1144875.16313714.1-  
SRR1144875.1655993.1-  
SRR1144875.32651981.2-  
SRR1144875.45276718.2-  
SRR1144875.62005888.1-  
SRR1144880.32733766.1-  
SRR1144880.3898918.1-  
SRR1144880.47304521.1-  
SRR1144880.47486423.1-  
SRR1144880.60062253.2-  
SRR1144871.71492114.1-  
SRR1144875.21621342.2-  
SRR1144872.13547249.2-

TGACCCCAAATAATCTTCACCT  
TGACCCCAAATAATCTTCACCT  
ACCCCAAATAATCTTCACCT  
CCTCAAATAATCTTCACCT  
CCCAAATAATCTTCACCT  
CCCAAATAATCTTCACCT  
CTCAAATAATCTTCACCT  
AAAATAATCTTCACCT  
AATAATCTTCACCT  
AATAATCTTCACCT  
TAATCTTCACCT  
AATCTTCACCT  
ATCTTCACCT  
ATCTTCACCT  
ATCTTCACCT  
TCTTCACCT  
CTTCACCT  
TCACCT  
CACCT  
ACCT  
CCT  
CCT  
CT

consensus

TTTCTTGATGAGGTACAGAGGCCCATCTGACCCAACTGACCCCAAATAATCTTCACCT

. : . : . : . : . : . :

SRR1144868.21254686.2+  
SRR1144869.1009297.1+  
SRR1144870.61673725.1+  
SRR1144875.22303585.2-  
SRR1144875.9845596.2-  
SRR1144880.18641104.1+  
SRR1144880.33661683.2-  
SRR1144880.34810606.1+  
SRR1144880.38243217.1+  
SRR1144880.70816288.2-  
SRR1144870.49105108.2-  
SRR1144878.34264526.2-  
SRR1144868.66301021.2-  
SRR1144870.6652156.2-  
SRR1144870.30102722.1+  
SRR1144869.27597638.2-  
SRR1144868.83942966.1-  
SRR1144871.31380950.2-  
SRR1144869.15441406.1+  
SRR1144877.33497325.1-  
SRR1144868.91567265.1+  
SRR1144873.13545456.1-  
SRR1144873.37100088.1+  
SRR1144878.1843122.1-  
SRR1144878.48127341.1-  
SRR1144879.54514274.1-  
SRR1144879.55281172.1-  
SRR1144879.55281281.1-  
SRR1144869.24285646.2-  
SRR1144879.14521809.2+  
SRR1144879.59056380.2+  
SRR1144871.3356165.1-  
SRR1144874.20419677.1-  
SRR1144868.62844636.2+  
SRR1144868.62844799.2+  
SRR1144868.86292250.2+  
SRR1144869.24327444.2+  
SRR1144873.7791113.1-  
SRR1144870.41621984.1+  
SRR1144877.66914433.1+  
SRR1144868.21392135.1+  
SRR1144873.24496541.1-  
SRR1144873.38386793.2-  
SRR1144873.9300436.1-  
SRR1144877.44248084.2+  
SRR1144879.46848275.2-

AT  
ATGA  
ATGA  
ATGAC  
ATGAC  
ATGACC  
ATGACCTG  
ATGACCTGA  
ATGACCTGA  
ATGACCTGAG  
ATGACCTGAGGCT  
ATGACCTGAGGCT  
ATGACCTGAGGCT  
ATGACCTGAGGCT  
ATGACCTGAGGCT  
ATGACCTGAGGCT  
ATGACCTGAGGCT  
ATGACCTGAGGCTGG  
ATGACCTGAGGCTGGAC  
ATGACCTGAGGCTGGAC  
ATGACCTGAGGCTGGACA  
ATGACCTGAGGCTGGACA  
ATGACCTGAGGCTGGACAA  
ATGACCTGAGGCTGAACAA  
ATGACCTGAGGCTGGACAACa  
ATGACCTGAGGCTGGACAACa  
ATGACCTGAGGCTGGACAACata  
ATGACCTGAGGCTGGACAACataa  
ATGACCTGAGGCTGGACAACataagt  
ATGACCTGAGGCTGGACAACataagt  
ATGACCTGAGGCTGGACAACataagt  
ATGACCTGAGGCTGGACAACataagt  
ATGACCTGAGGCTGGACAACataagt

SRR1144879.48882587.1- ATGACCTGAGGCTGGACAACataagt  
SRR1144879.8450688.2- ATGACCTGAGGCTGGACAACataagt  
SRR1144869.70757485.2+ ATGACCTGAGGCTGGACAACataagta  
SRR1144872.54542593.2- ATGACCTGAGGCTGGACAACataagta  
SRR1144873.10372297.2+ ATGACCTGAGGCTGGACAACataagtat  
SRR1144878.57144785.2+ ATGACCTGAGGCTGGACAACataagtattg  
SRR1144869.63440671.2+ ATGACCTGAGGCTGGACAACataagtattgg  
SRR1144869.64941349.1- ATGACCTGAGGCTGGACAACataagtattgga  
SRR1144869.64941350.1- ATGACCTGAGGCTGGACAACataagtattgga  
SRR1144868.45792615.1+ ATGACCTGAGGCTGGACAACataagtattggaca  
SRR1144879.25392406.1+ ATGACCTGAGGCTGGACAACataagtattggacaa  
SRR1144879.26982715.2- ATGACCTGAGGCTGGACAACataagtattggacaa  
SRR1144872.1082717.1+ ATGACCTGAGGCTGGACAACataagtattggacaag  
SRR1144869.12072787.2- ATGACCTGAGGCTGGACAACataagtattggacaaga  
SRR1144871.71492114.2+ ATGACCTGAGGCTGGACAACataagtattggacaaga  
SRR1144868.45903722.2+ ATGACCTGAGGCTGGACAACataagtattggacaagag  
SRR1144868.41065561.1+ ATGACCTGAGGCTGGACAACataagtattggacaagagc  
SRR1144870.53925041.1+ ATGACCTGAGGCTGGACAACataagtattggacaagagc  
SRR1144877.30797025.1+ ATGACCTGAGGCTGGACAACataagtattggacaagagc  
SRR1144877.34278009.1+ ATGACCTGAGGCTGGACAACataagtattggacaagagc  
SRR1144869.43766655.1+ ATGACCTGAGGCTGGACAACataagtattggacaagagcat  
SRR1144869.63650894.1+ ATGACCTGAGGCTGGACAACataagtattggacaagagcatta  
SRR1144869.8345878.2+ ATGACCTGAGGCTGGACAACataagtattggacaagagcatta  
SRR1144877.66940950.1- ATGACCTGAGGCTGGACAACataagtattggacaagagcattac  
SRR1144875.16313714.1- ATGACCTGAGGCTGGACAACataagtattggacaagagcattact  
SRR1144875.1655993.1- ATGACCTGAGGCTGGACAACataagtattggacaagagcattact  
SRR1144875.32651981.2- ATGACCTGAGGCTGGACAACataagtattggacaagagcattact  
SRR1144875.45276718.2- ATGACCTGAGGCTGGACAACataagtattggacaagagcattact  
SRR1144875.62005888.1- ATGACCTGAGGCTGGACAACataagtattggacaagagcattact  
SRR1144880.32733766.1- ATGACCTGAGGCTGGACAACataagtattggacaagagcattact  
SRR1144880.3898918.1- ATGACCTGAGGCTGGACAACataagtattggacaagagcattact  
SRR1144880.47304521.1- ATGACCTGAGGCTGGACAACataagtattggacaagagcattact  
SRR1144880.47486423.1- ATGACCTGAGGCTGGACAACataagtattggacaagagcattact  
SRR1144880.60062253.2- ATGACCTGAGGCTGGACAACataagtattggacaagagcattact  
SRR1144869.63616507.1- ATGACCTGAGGCTGGACAACataagtattggacaagagcattactt  
SRR1144875.21621342.2- ATGACCTGAGGCTGGACAACataagtattggacaagagcattactt  
SRR1144872.13547249.2- ATGACCTGAGGCTGGACAACataagtattggacaagagcattacttg  
SRR1144871.45966609.2- ATGACCTGAGGCTGGACAACataagtattggacaagagcattacttggcat  
SRR1144868.38943194.1+ ATGACCTGAGGCTGGACAACataagtattggacaagagcattacttggcatg  
SRR1144868.50956912.1+ ATGACCTGAGGCTGGACAACataagtattggacaagagcattacttggcatg  
SRR1144869.76334149.1- ATGACCTGAGGCTGGACAACataagtattggacaagagcattacttggcatg  
SRR1144869.76334150.1- ATGACCTGAGGCTGGACAACataagtattggacaagagcattacttggcatg  
SRR1144870.5500488.2- ATGACCTGAGGCTGGACAACataagtattggacaagagcattacttggcatg  
SRR1144869.50380653.1+ ATGACCTGAGGCTGGACAACataagtattggacaagagcattacttggcatg  
SRR1144868.25258814.1- ATGACCTGAGGCTGGACAACataagtattggacaagagcattacttggcatg  
SRR1144868.40331692.2- ATGACCTGAGGCTGGACAACataagtattggacaagagcattacttggcatg  
SRR1144868.60393072.2- ATGACCTGAGGCTGGACAACataagtattggacaagagcattacttggcatg  
SRR1144868.90126106.1- ATGACCTGAGGCTGGACAACataagtattggacaagagcattacttggcatg  
SRR1144868.92408075.1- ATGACCTGAGGCTGGACAACataagtattggacaagagcattacttggcatg  
SRR1144868.92408258.1- ATGACCTGAGGCTGGACAACataagtattggacaagagcattacttggcatg  
SRR1144868.93193558.2+ ATGACCTGAGGCTGGACAACataagtattggacaagagcattacttggcatg  
SRR1144869.3270077.1+ ATGACCTGAGGCTGGACAACataagtattggacaagagcattacttggcatg  
SRR1144869.3270217.1+ ATGACCTGAGGCTGGACAACataagtattggacaagagcattacttggcatg  
SRR1144869.39444143.1- ATGACCTGAGGCTGGACAACataagtattggacaagagcattacttggcatg  
SRR1144869.4662147.2- ATGACCTGAGGCTGGACAACataagtattggacaagagcattacttggcatg  
SRR1144869.47784350.1- ATGACCTGAGGCTGGACAACataagtattggacaagagcattacttggcatg  
SRR1144869.7266474.2- ATGACCTGAGGCTGGACAACataagtattggacaagagcattacttggcatg  
SRR1144870.2992437.2+ ATGACCTGAGGCTGGACAACataagtattggacaagagcattacttggcatg  
SRR1144870.30102722.2- ATGACCTGAGGCTGGACAACataagtattggacaagagcattacttggcatg  
SRR1144870.41621984.2- ATGACCTGAGGCTGGACAACataagtattggacaagagcattacttggcatg  
SRR1144870.53925041.2- ATGACCTGAGGCTGGACAACataagtattggacaagagcattacttggcatg  
SRR1144870.59632527.1+ ATGACCTGAGGCTGGACAACataagtattggacaagagcattacttggcatg  
SRR1144870.61673725.2- ATGACCTGAGGCTGGACAACataagtattggacaagagcattacttggcatg  
SRR1144870.63521823.1+ ATGACCTGAGGCTGGACAACataagtattggacaagagcattacttggcatg  
SRR1144871.55766386.1- ATGACCTGAGGCTGGACAACataagtattggacaagagcattacttggcatg  
SRR1144871.71492114.1- ATGACCTGAGGCTGGACAACataagtattggacaagagcattacttggcatg  
SRR1144868.41459039.1+ ATGACCTGAGGCTGGACAACataagtattggacaagagcattacttggcatg  
SRR1144868.29201477.2- GACCTGAGGCTGGACAACataagtattggacaagagcattacttggcatg  
SRR1144869.37171537.2- ACCTGAGGCTGGACAACataagtattggacaagagcattacttggcatg  
SRR1144877.32428901.2+ CTGAGGCTGGACAACataagtattggacaagagcattacttggcatg  
SRR1144878.29416815.2- CTGAGGCTGGACAACataagtattggacaagagcattacttggcatg  
SRR1144868.78420249.1+ CTGAGGCTGGACAACataagtattggacaagagcattacttggcatg  
SRR1144870.8228234.2+ CTGAGGCTGGACAACataagtattggacaagagcattacttggcatg  
SRR1144877.39321162.1- AGGCTGGACAACataagtattggacaagagcattacttggcatg  
SRR1144878.21214886.1- AGGCTGGACAACataagtattggacaagagcattacttggcatg  
SRR1144868.27877859.2+ AGGCTGGACAACataagtattggacaagagcattacttggcatg  
SRR1144872.25108680.2+ GGCTGGACAACataagtattggacaagagcattacttggcatg  
SRR1144872.45310390.2+ GGCTGGACAACataagtattggacaagagcattacttggcatg  
SRR1144871.50082040.2+ GGCTGGACAACataagtattggacaagagcattacttggcatg  
SRR1144873.48276514.1+ CTGGACAACataagtattggacaagagcattacttggcatg  
SRR1144879.46173129.1+ CTGGACAACataagtattggacaagagcattacttggcatg  
SRR1144868.27151520.2- GACAACataagtattggacaagagcattacttggcatg  
SRR1144870.3613080.1+ CAACataagtattggacaagagcattacttggcatg  
SRR1144873.42090231.1- AACataagtattggacaagagcattacttggcatg

|                        |                                             |
|------------------------|---------------------------------------------|
| SRR1144877.51631482.1- | AACataagtattggacaagagcattacttggcatgttaaaaaa |
| SRR1144877.57857415.1+ | AACataagtattggacaagagcattacttggcatgttaaaaaa |
| SRR1144868.81099429.1+ | ACataagtattggacaagagcattacttggcatgttaaaaaa  |
| SRR1144873.11440383.2- | ACataagtattggacaagagcattacttggcatgttaaaaaa  |
| SRR1144873.16640611.2- | ACataagtattggacaagagcattacttggcatgttaaaaaa  |
| SRR1144873.27516368.2- | ACataagtattggacaagagcattacttggcatgttaaaaaa  |
| SRR1144873.51739636.1- | ACataagtattggacaagagcattacttggcatgttaaaaaa  |
| SRR1144879.6458933.2-  | ACataagtattggacaagagcattacttggcatgttaaaaaa  |
| SRR1144869.12895680.2- | Cataagtattggacaagagcattacttggcatgttaaaaaa   |
| SRR1144869.69410263.1- | Cataagtattggacaagagcattacttggcatgttaaaaaa   |

consensus

ATGACCTGAGGCTGGACAACataagtattggacaagagcattacttggcatgttaaaaaa

---

# K. Kea (No. 11), exon 4, WGS data

- CAP3 alignment of WGS data spanning exon 4 (uppercase letters)

```
      .   :   .   :   .   :   .   :   .   :   .   :   .   :
SRR959225.55927882.1- gttattgagttgccaggggaaccctcaggtgacccatggtgtgtttcttttcaaTTG
SRR959225.49491860.1+ gttattgagttgccaggggaaccctcaggagacacatggtgtgtttcttttcaaTTG
SRR959225.59145430.2- gttattgagttgccaggggaaccctcaggtgacccatggtgtgtttcttttcaaTTG
SRR959225.59640912.1- gttattgagttgccaggggaaccctcaggtgacccatggtgtgtttcttttcaaTTG
SRR959225.63515961.1- gttattgagttgccaggggaaccctcaggtgacccatggtgtgtttcttttcaaTTG
SRR959225.7722830.1+ gttattgagttgccaggggaaccctcaggtgacccatggtgtgtttcttttcaaTTG
SRR959225.90843042.1+ gttattgagttgccaggggaaccctcaggtgacccatggtgtgtttcttttcaaTTG
SRR959225.94255078.1+ gttattgagttgccaggggaaccctcaggtgacccatggtgtgtttcttttcaaTTG
SRR959225.9808133.1+ gttattgagttgccaggggaaccctcaggtgacccatggtgtgtttcttttcaaTTG
SRR959226.14030507.2+ gttattgagttgccaggggaaccctcaggtgacccatggtgtgtttcttttcaaTTG
SRR959226.4499420.2- gttattgagttgccaggggaaccctcaggtgacccatggtgtgtttcttttcaaTTG
SRR959226.51154971.1+ gttattgagttgccaggggaaccctcaggtgacccatggtgtgtttcttttcaaTTG
SRR959226.55198843.1+ gttattgagttgccaggggaaccctcaggtgacccatggtgtgtttcttttcaaTTG
SRR959227.18222216.1+ gttattgagttgccaggggaaccctcaggtgacccatggtgtgtttcttttcaaTTG
SRR959227.22875044.2+ gttattgagttgccaggggaaccctcaggtgacccatggtgtgtttcttttcaaTTG
SRR959227.22957956.1+ gttattgagttgccaggggaaccctcaggtgacccatggtgtgtttcttttcaaTTG
SRR959225.4318033.1- ttattgagttgccaggggaaccctcaggtgacccatggtgtgtttcttttcaaTTG
SRR959227.75998761.2+ agttgccaggggaaccctcaggtgacccatggtgtgtttcttttcaaTTG
SRR959227.36915196.2+ gccaggggaaccctcaggtgacccatggtgtgtttcttttcaaTTG
SRR959225.90843042.2- aaccctcaggtgacccatggtgtgtttcttttcaaTTG
SRR959225.27455840.2+ cctcaggtgacccatggtgtgtttcttttcaaTTG
SRR959225.33495248.2- aggtgacccatggtgtgtttcttttcaaTTG
SRR959225.54283651.1- aggtgacccatggtgtgtttcttttcaaTTG
SRR959225.5996382.1- gtgacccatggtgtgtttcttttcaaTTG
SRR959225.3355209.2+ gacccatggtgtgtttcttttcaaTTG
SRR959225.23411114.2- acccatggtgtgtttcttttcaaTTG
SRR959225.81686073.1+ acccatggtgtgtttcttttcaaTTG
SRR959226.45349599.1- acccatggtgtgtttcttttcaaTTG
SRR959227.55032331.2- cccatggtgtgtttcttttcaaTTG
SRR959227.53810762.2+ tgtgtgtttcttttcaaTTG
SRR959225.84786349.1+ gtgtgtttcttttcaaTTG
SRR959226.52538067.2+ gttcttttcaaTTG
SRR959225.20136878.1+ ctttttcaaTTG
SRR959227.50673472.1+ tttttcaaTTG
SRR959227.4979772.2- tcaaTTG
SRR959226.35159252.1+ aTTG
```

consensus gttattgagttgccaggggaaccctcaggtgacccatggtgtgtttcttttcaaTTG

```
      .   :   .   :   .   :   .   :   .   :   .   :   .   :
SRR959227.18222216.1+ ATTCCA
SRR959225.94255078.1+ ATTCCAGT
SRR959225.59145430.2- ATTCCAGTTG
SRR959225.59640912.1- ATTCCAGTTGAAGA
SRR959226.4499420.2- ATTCCAGTTGAAGAAAT
SRR959225.63515961.1- ATTCCAGTTGAAGAAATCAC
SRR959227.22957956.1+ ATTCCAGTTGAAGAAATCACAT
SRR959225.7722830.1+ ATTCCAGTTGAAGAAATCACATACATATCC
SRR959226.51154971.1+ ATTCCAGTTGAAGAAATCACATACATATCC
SRR959225.49491860.1+ CTCCAGTTGAAGAAATCACATACATATCCCTGTA
SRR959227.22875044.2+ ATTCCAGTTGAAGAAATCACATACATATACCTGTA
SRR959226.14030507.2+ ATTCCAGTTGAAGAAATCACATACATATCCCTGTACC
SRR959225.90843042.1+ ATTCCAGTTGAAGAAATCACATACATATCCCTGTACCT
SRR959225.9808133.1+ ATTCCAGTTGAAGAAATCACATACATATCCCTGTACCTT
SRR959226.55198843.1+ ATTCCAGTTGAAGAAATCACATACATATCCCTGTACCTT
SRR959225.4318033.1- ATTCCAGTTGAAGAAATCACATACATATCCCTGTACCTTTA
SRR959227.75998761.2+ ATTCCAGTTGAAGAAATCACATACATATCCCTGTACCTTTATCCAC
SRR959227.36915196.2+ ATTCCAGTTGAAGAAATCACATACATATCACTGTACCTTTATCCCTACTGCC
SRR959225.90843042.2- ATTCCAGTTGAAGAAATCACATACATATCCCTGTACCTTTATCCCACTGCCACTGTCA
SRR959225.20136878.1+ ATTCCAGTTGAAGAAATCACATACATATCCCTGTACCTTTATCCCACTGCCACTGTCAA
SRR959225.23411114.2- ATTCCAGTTGAAGAAATCACATACATATCCCTGTACCTTTATCCCACTGCCACTGTCAA
SRR959225.27455840.2+ ATTCCAGTTGAAGAAATCACATACATATCCCTGTACCTTTATCCCACTGCCACTGTCAA
SRR959225.33495248.2- ATTCCAGTTGAAGAAATCACATACATATCCCTGTACCTTTATCCCACTGCCACTGTCAA
SRR959225.3355209.2+ ATTCCAGTTGAAGAAATCACATACATATCCCTGTACCTTTATCCCACTGCCACTGTCAA
SRR959225.54283651.1- ATTCCAGTTGAAGAAATCACATACATATCCCTGTACCTTTATCCCACTGCCACTGTCAA
SRR959225.5996382.1- ATTCCAGTTGAAGAAATCACATACATATCCCTGTACCTTTATCCCACTGCCACTGTCAA
SRR959225.81686073.1+ ATTCCAGTTGAAGAAATCACATACATATCCCTGTACCTTTATCCCACTGCCACTGTCAA
SRR959225.84786349.1+ ATTCCAGTTGAAGAAATCACATACATATCCCTGTACCTTTATCCCACTGCCACTGTCAA
SRR959226.35159252.1+ ATTCCAGTTGAAGAAATCACATACATATCCCTGTACCTTTATCCCACTGCCACTGTCAA
SRR959226.45349599.1- ATTCCAGTTGAAGAAATCACATACATATCCCTGTACCTTTATCCCACTGCCACTGTCAA
SRR959226.52538067.2+ ATTCCAGTTGAAGAAATCACATACATATCCCTGTACCTTTATCCCACTGCCACTGTCAA
SRR959226.69078214.1- ATTCCAGTTGAAGAAATCACATACATATCCCTGTACCTTTATCCCACTGCCACTGTCAA
SRR959227.4979772.2- ATTCCAGTTGAAGAAATCACATACATATCCCTGTACCTTTATCCCACTGCCACTGTCAA
SRR959227.50673472.1+ ATTCCAGTTGAAGAAATCACATACATATCCCTGTACCTTTATCCCACTGCCACTGTCAA
SRR959227.53810762.2+ ATTCCAGTTGAAGAAATCACATACATATCCCTGTACCTTTATCCCACTGCCACTGTCAA
```

SRR959227.55032331.2- ATTCCAGTTGAAGAAATCACATACATATCCCTGTACCTTTATCCCACTGCCCACTGTCAA  
SRR959226.44625528.1+ TGAAGAAATCACATACATATCCCTGTACCTTTATCCCACTGCCCACTGTCAA  
SRR959225.51251850.2- GAAGAAAGCACATACATATCCCTGCACCTTTATCCCACTGCCCACTGTCAA  
SRR959225.15444684.1- AATCACATACATATCCCTGTACCTTTATCCCACTGCCCACTGTCAA  
SRR959227.50163015.2+ ACATACATATCCCTGTACCTTTATCCCACTGCCCACTGTCAA  
SRR959227.7714433.2+ TCCTGTACCTTTATCCCACTGCCCACTGTCAA  
SRR959227.16030144.1+ CCTTTATCCCACTGCCCACTGTCAA  
SRR959227.19019145.1+ TCCCACTGCCCACTGTCAA  
SRR959227.75881652.1+ CCACTGCCCACTGTCAA  
SRR959225.74795193.1+ CACTGCCCACTGTCAA  
SRR959226.57565219.2- GCCCACTGTCAA  
SRR959227.32203429.1+ GCTTCAAA  
SRR959225.74682073.1+ CAA  
SRR959226.4794536.2- AA  
SRR959226.63286309.2+ AA  
SRR959226.4463198.1- A

consensus

ATTCCAGTTGAAGAAATCACATACATATCCCTGTACCTTTATCCCACTGCCCACTGTCAA

. : . : . : . : . : . :  
SRR959225.27455840.2+ GC  
SRR959225.33495248.2- GCAGAA  
SRR959225.54283651.1- GCAGAA  
SRR959225.5996382.1- GCAGAAAC  
SRR959225.3355209.2+ GCAGAAACAC  
SRR959225.23411114.2- GCAGAAACACC  
SRR959225.81686073.1+ GCAGAAACACC  
SRR959226.45349599.1- GCAGAAACACC  
SRR959227.55032331.2- GCAGAAACACCA  
SRR959227.53810762.2+ GCAGAAACACCATTAT  
SRR959225.84786349.1+ GCAGAAACACCATTATC  
SRR959226.52538067.2+ GCAGAAACACCATTATCTACA  
SRR959225.20136878.1+ GCAGAAACACCATTATCTACAAGgt  
SRR959227.50673472.1+ GCAGAAACACCATTATCTACAAGgta  
SRR959227.4979772.2- GCAGAAACACCATTATCTACAAGgtaaat  
SRR959226.35159252.1+ GCAGAAACACCATTATCTACAAGgtaaatgtc  
SRR959226.69078214.1- GCAGAAACACCATTATCTACAAGgtaaatgtcaggtttg  
SRR959226.44625528.1+ GCAGAAACACCATTATCTACAAGgtaaatgtcaggtttgtcacaact  
SRR959225.51251850.2- GCAGAAACACCATTATCTACAAGgtaaatgtcaggtttgtcacaactg  
SRR959225.15444684.1- GCAGAAACACCATTATCTACAAGgtaaatgtcaggtttgtcacaactggggagaaacag  
SRR959227.50163015.2+ GCAGAAACACCATTATCTACAAGgtaaatgtcaggtttgtcccaactggggagaaacag  
SRR959225.74682073.1+ GCAGAAACACCATTATCTACAAGgtaaatgtcaggtttgtcacaactggggagaaacag  
SRR959225.74795193.1+ GCAGAAACACCATTATCTACAAGgtaaatgtcaggtttgtcacaactggggagaaacag  
SRR959226.4463198.1- GCAGAAACACCATTATCTACAAGgtaaatgtcaggtttgtcacaactggggagaaacag  
SRR959226.4794536.2- GCAGAAACACCATTATCTACAAGgtaaatgtcaggtttgtcacaactggggagaaacag  
SRR959226.57565219.2- GCAGAAACACCATTATCTACAAGgtaaatgtcaggtttgtcacaactggggagaaacag  
SRR959226.63286309.2+ GCAGAAACACCATTATCTACAAGgtaaatgtcaggtttgtcacaactggggagaaacag  
SRR959227.16030144.1+ GCAGAAACACCATTATCTACAAGgtaaatgtcaggtttgtcacaactggggagaaacag  
SRR959227.19019145.1+ GCAGAAACACCATTATCTACAAGgtaaatgtcaggtttgtcacaactggggagaaacag  
SRR959227.32203429.1+ GCAGAAACACCATTATCTACAAGgtaaatgtcaggtttgtcacaactggggagaaacag  
SRR959227.75881652.1+ GCAGAAACACCATTATCTACAAGgtaaatgtcaggtttgtcacaactggggagaaacag  
SRR959227.7714433.2+ GCAGAAACACCATTATCTACAAGgtaaatgtcaggtttgtcacaactggggagaaacag  
SRR959225.35932207.1+ CACCATTATCTACAAGgtaaatgtcaggtttgtcacaactggggagaaacag  
SRR959225.59869922.2+ CATTATCTACAAGgtaaatgtcaggtttgtcacaactggggagaaacag  
SRR959225.7861402.1- ACAAGgcaaatgtcaggtttgtcacaactggggagaaacag  
SRR959227.32338303.2+ ACAAGgtaaatgtcaggtttgtcacaactggggagaaacag  
SRR959227.42566408.1+ CAAGgtaaatgtcaggtttgtcacaactggggagaaacag  
SRR959227.19171617.2- AAGgtaaatgtcaggtttgtcacaactggggagaaacag  
SRR959227.3045510.2- AAGgtaaatgtcaggtttgtcacaactggggagaaacag  
SRR959225.96117414.2- AGgtaaatgtcaggtttgtcacaactggggagaaacag  
SRR959226.77806910.2+ AGgtaaatgtcaggtttgtcacaactggggagaaacag

consensus

GCAGAAACACCATTATCTACAAGgtaaatgtcaggtttgtcacaactggggagaaacag

# L. Budgerigar (No. 12), exon 4, WGS data

- CAP3 alignment of WGS data spanning exon 4 (uppercase letters)

```
ERR244157.76016802.1+   tgtttcttttccatT
ERR244146.109211469.2-   t--ttcttttccatTTT
ERR244156.98634684.2+   t--ttcttttccatTTTG
ERR244146.120120261.1+   g--ttgtttccottTTTGC
ERR244157.96563184.2-   t--ttcttttccatTTTGCTG
ERR244158.36848991.1-   t--ttcttttccatTTTGCTGT
ERR244157.55245384.1-   t--ttcttttccatTTTGCTGTTCT
ERR244156.150852715.1-   t--ttcttttccatTTTGCTGTTCTG
tgtttcttttccatTTTGCTGTTCCAG
ERR244145.89602273.2+   t--ttcttttccatTTTGCTGTTCTGGC
ERR244147.20148833.2-   t--ttcttttccatTTTGCTGTTCTGGC
ERR244156.24514958.1-   tgtttcttttccatTTTGCTGTTCCAGT
ERR244145.96068630.2+   t--ttcttttccatTTTGCTGTTCTGGCTG
tgtttcttttccatTTTGCTGTTCCAGTTG
ERR244146.87876677.2-   t--ttcttttccatTTTGCTGTTCTGGCTGA
ERR244151.32370255.2+   t--ttcttttccatTTTGCTGTTCTGGCTGAA
ERR244156.75594749.2+   tgtttcttttccatTTTGCTGTTCCAGTTGAA
ERR244145.142298147.1-   t--ttcttttccatTTTGCTGTTCTGGCTGAAGA
ERR244153.66220651.2-   t--ttcttttccatTTTGCTGTTCTGGCTGAAGA
ERR244145.109411984.1-   t--ttcttttccatTTTGCTGTTCTGGCTGAAGAA
ERR244145.136532548.2-   t--ttcttttccatTTTGCTGTTCTGGCTGAAGAA
ERR244156.114525817.1+   tgtttcttttccatTTTGCTGTTCCAGTTGAAGAA
ERR244145.139130025.1-   t--ttcttttccatTTTGCTGTTCTGGCTGAAGAAA
ERR244156.66837716.1-   t--ttcttttccatTTTGCTGTTCTGGCTGAAGAAAACC
ERR244157.63718191.1+   t--ttcttttccatTTTGCTGTTCTGGCTGAAGAAAACCA
ERR244158.806159.2-   tgtttcttttccatTTTGCTGTTCCAGTTGAAGAAAACCA
ERR244156.141617992.1+   tgtttcttttccatTTTGCTGTTCCAGTTGAAGAAAACCAT
ERR244157.76321302.2-   tgtttcttttccatTTTGCTGTTCCAGTTGAAGAAAACCAT
ERR244156.133816308.2+   tgtttcttttccatTTTGCTGTTCCAGTTGAAGAAAACCATA
ERR244157.98479751.2-   t--ttcttttccatTTTGCTGTTCTGGCTGAAGAAAACCATA
ERR244145.39604221.1+   t--ttcttttccatTTTGCTGTTCTGGCTGAAGAAAACCATAT
ERR244148.14907354.2+   t--ttcttttccatTTTGCTGTTCTGGCTGAAGAAAACCATAT
ERR244148.67652096.2+   t--ttcttttccatTTTGCTGTTCTGGCTGAAGAAAACCATAT
ERR244156.31231237.1-   tgtttcttttccatTTTGCTGTTCCAGTTGAAGAAAACCATATA
ERR244157.74064951.2-   t--ttcttttccatTTTGCTGTTCTGGCTGAAGAAAACCATATA
ERR244145.32145537.2-   tgtttcttttccatTTTGCTGTTCCAGTTGAAGAAAACCATATAT
ERR244147.93446370.2+   tgattcttttccctTTTGCTGTTACAGTTTATGAAACCAGATATG
ERR244151.48196842.1+   t--ttcttttccatTTTGCTGTTCTGGCTGAAGAAAACCATATATG
ERR244156.102713578.2+   t--ttcttttccatTTTGCTGTTCTGGCTGAAGAAAACCATATATG
ERR244146.39934981.1+   t--ttcttttccatTTTGCTGTTCTGGCTGAAGAAAACCATATATGC
ERR244157.24600673.1+   t--ttcttttccatTTTGCTGTTCTGGCTGAAGAAAACCATATATGC
ERR244158.14554932.1+   t--ttcttttccatTTTGCTGTTCTGGCTGAAGAAAACCATATATGC
ERR244158.39975997.1+   t--ttcttttccatTTTGCTGTTCTGGCTGAAGAAAACCATATATGC
ERR244146.153780298.2+   tgtttcttttccatTTTGCTGTTCCAGTTGAGAAAACCATATATGCC
ERR244145.138381124.1-   tgtttcttttccatTTTGCTGTTCCAGTTGAAGAAAACCATATATGCCT
ERR244158.40372127.1-   t--ttcttttccatTTTGCTGTTCTGGCTGAAGAAAACCATATATGCCTG
ERR244145.19972568.1+   tgtttcttttccatTTTGCTGTTCCAGTTGAAGAAAACCATATATCTCTGT
ERR244156.50761240.1+   t--ttcttttccatTTTGCTGTTCTGGCTGAAGAAAACCATATATGCCTGT
ERR244156.68083478.2+   tgtttcttttccatTTTGCTGTTCCAGTTGAAGAAAACCATATATGCCTGT
ERR244153.3083667.2+   t--ttcttttccatTTTGCTGTTCTGGCTGAAGAAAACCATATATGCCTGTA
ERR244153.74352287.1+   t--ttcttttccatTTTGCTGTTCTGGCTGAAGAAAACCATATATGCCTGTA
ERR244157.103004017.1+   tgtttcttttccatTTTGCTGTTCCAGTTGAAGAAAACCATATATGCCTGTAT
ERR244145.151981935.2-   t--ttcttttccatTTTGCTGTTCTGGCTGAAGAAAACCATATATGCCTGTATT
ERR272382.180088.2-   t--ttcttttccatTTTGCTGTTCTGGCTGAAGAAAACCATATATGCCTGTATT
ERR244146.7970188.2-   tgtttcttttccatTTTGCTGTTCCAGTTGAAGAAAACCATATATGCCTGTATCT
ERR244157.73894864.1-   tgtttcttttccatTTTGCTGTTCCAGTTGAAGAAAACCATATATGCCTGTATCT
ERR244146.38383027.1-   tgtttcttttccatTTTGCTGTTCCAGTTGAAGAAAACCATATATGCCTGTATCTT
ERR244156.14411817.2-   tgtttcttttccatTTTGCTGTTCCAGTTGAAGAAAACCATATATGCCTGTATCTT
ERR244145.150845067.1-   tgtttcttttccatTTTGCTGTTCCAGTTGAAGAAAACCATATATGCCTGTATCTTT
ERR244146.131310014.1+   t--ttcttttccatTTTGCTGTTCTGGCTGAAGAAAACCATATATGCCTGTATTTTT
ERR244146.146406433.1+   tgtttcttttccatTTTGCTGTTCCAGTTGAAGAAAACCATATATGACTGTATCTTT
ERR244147.33464638.1-   t--ttcttttccatTTTGCTGTTCTGGCTGAAGAAAACCATATATGCCTGTATTTTT
ERR244149.5303750.2-   t--ttcttttccatTTTGCTGTTCTGGCTGAAGAAAACCATATATGCCTGTATTTTT
ERR244146.133798042.1-   t--ttcttttccatTTTGCTGTTCTGGCTGAAGAAAACCATATATGCCTGTATTTTTAT
ERR244147.88524223.1-   t--ttcttttccatTTTGCTGTTCTGGCTGAAGAAAACCATATATGCCTGTATTTTTAT
ERR244156.98930996.1-   tgtttcttttccatTTTGCTGTTCCAGTTGAAGAAAACCATATATGCCTGTATCTTTAT
ERR244156.129121093.1-   t--ttcttttccatTTTGCTGTTCTGGCTGAAGAAAACCATATATGCCTGTATTTTTATC
ERR244156.54583533.2-   t--ttcttttccatTTTGCTGTTCTGGCTGAAGAAAACCATATATGCCTGTATTTTTATC
ERR244157.97834118.1+   tgtttcttttccatTTTGCTGTTCCAGTTGAAGAAAACCATATATGCCTGTATCTTTATC
ERR244158.3507344.2+   tgtttcttttccatTTTGCTGTTCCAGTTGAAGAAAACCATATATGCCTGTATCTTTATC
ERR244145.102457280.1+   tgtttcttttccatTTTGCTGTTCCAGTTGAAGAAAACCATATATGCCTGTATCTTTATCC
ERR244145.106184922.1+   t--ttcttttccatTTTGCTGTTCTGGCTGAAGAAAACCATATATGCCTGTATTTTTATCC
ERR244145.110237827.2-   tgtttcttttccatTTTGCTGTTCCAGTTGAAGAAAACCATATATGCCTGTATCTTTATCC
ERR244145.127347530.1-   tgtttcttttccatTTTGCTGTTCCAGTTGAAGAAAACCATATATGCCTGTATCTTTATCC
ERR244145.127347530.2+   tgtttcttttccatTTTGCTGTTCCAGTTGAAGAAAACCATATATGCCTGTATCTTTATCC
```



ERR244145.17810775.1- t--ttcttttccatTTTGTGTTCTGGCTGAAGAAACCATATATGCCTGTATTTTATCC  
ERR244145.18845138.2+ tgtttcttttccatTTTGTGTTCCAGTTGAAGAAACCCATATATGCCTTTATCTTTATCC  
ERR244145.19972568.2- tgtttcttttccatTTTGTGTTCCAGTTGAAGAAACCATATATGCCTGTATCTTTATCC  
ERR244145.22441587.2+ tgtttcttttccatTTTGTGTTCCAGTTGAAGAAACCATATATGCCTGTATCTTTATCC  
ERR244145.30608194.2+ t--ttcttttccatTTTGTGTTCTGGCTGAAGAAACCATATATGCCTGTATTTTATCC  
ERR244145.37775792.1- t--ttcttttccatTTTGTGTTCTGGCTGAAGAAACCATATATGCCTGTATTTTATCC  
ERR244145.39604221.2- t--ttcttttccatTTTGTGTTCTGGCTGAAGAAACCATATATGCCTGTATTTTATCC  
ERR244145.46160951.1+ t--ttcttttccatTTTGTGTTCTGGCTGAAGAAACCATATATGCCTGTATTTTATCA  
ERR244145.46160951.2- t--ttcttttccatTTTGTGTTCTGGCTGAAGAAACCATATATGCCTGTATTTTATCC  
ERR244145.46643170.2+ t--ttcttttccatTTTGTGTTCTGGCTGAAGAAACCATATATGCCTGTATTTTATCC  
ERR244145.48548398.2+ tgtttcttttccatTTTGTGTTCTGGCTGAAGAAACCATATATGCCTGTATTTTATCC  
ERR244145.57384943.1- tgtttcttttccatGTTGTGTTCCAGTTGAATAAACCATATATGCCTGTATCTTTATCC  
ERR244145.57384943.2+ tgtttattttccatTTTGTGTTCCAGTTTGAAGAAACCATATATGCCTGTATCTTTATCC  
ERR244145.63687745.1+ t--ttcttttccatTTTGTGTTCTGGCTGAAGAAACCATATATGCCTGTATTTTATCC  
ERR244145.80053276.2+ t--ttcttttccatTTTGTGTTCTGGCTGAAGAAACCATATATGCCTGTATTTTATCC  
ERR244145.89602273.1- t--ttcttttccatTTTGTGTTCTGGCTGAAGAAACCATATATGCCTGTATTTTATCC  
ERR244145.96068630.1- t--ttcttttccatTTTGTGTTCTGGCTGAAGAAACCATATATGCCTGTATTTTATCC  
ERR244145.98207251.2+ tgtttcttttccatTTTGTGTTCTGGCTGAAGAAACCATATATGCCTGTATTTTATCC  
ERR244146.103365155.1- tgtttcttttccatTTTGTGTTCCAGTTGAAGAAACCATATATGCCTGTATCTTTATCC  
ERR244146.107304693.2+ t--ttcttttccatTTTGTGTTCTGGCTGAAGAAACCATATATGCCTGCATTTTATCC  
ERR244146.109494033.2+ t--ttcttttccatTTTGTGTTCTGGCTGAAGAAACCATATATGCCTGTATTTTATCC  
ERR244146.116947821.2- tgtttcttttccatTTTGTGTTCTGGCTGAAGAAACCATATATGCCTGTATTTTATCC  
ERR244146.118142077.2+ t--ttcttttccatTTTGTGTTCTGGCTGAAGAAACCATATATGCCTGTATTTTATCC  
ERR244146.118918090.2- tgtttcttttccatTTTGTGTTCCAGTTGAAGAAACCATATATGCCTGTATCTTTATCC  
ERR244146.124845523.2- tgtttcttttccatTTTGTGTTCCAGTTGAAGAAACCATATATGCCTGTATCTTTATCC  
ERR244146.140222926.2+ tgtttcttttccatTTTGTGTTCCAGTTGAAGAAACCATATATGCCTGTATCTTTATCC  
ERR244146.14354249.2- tgtttcttttccatTTTGTGTTCCAGTTGAAGAAACCATATATGCCTGTATCTTTATCC  
ERR244146.143563595.1- t--ttcttttccatTTTGTGTTCTGGCTGAAGAAACCATATATGCCTGTATTTTATCC  
ERR244146.146536627.2- tgtttcttttccatTTTGTGTTCCAGTTGAAGAAACCATATATGCCTGTATCTTTATCC  
ERR244146.150494649.2- t--ttcttttccatTTTGTGTTCTGGCTGAAGAAACCATATATGCCTGTATTTTATCC  
ERR244146.29560179.1- t--ttcttttccatTTTGTGTTCTGGCTGAAGAAACCATATATGCCTGTATTTTATCC  
ERR244146.47506220.2- t--ttcttttccatTTTGTGTTCTGGCTGAAGAAACCATATATGCCTGTATTTTATCC  
ERR244146.49370712.2- tgtttcttttccatTTTGTGTTCCAGTTGAAGAAACCATATATGCCTGTATCTTTATCC  
ERR244146.52725920.1- t--ttcttttccatTTTGTGTTCTGGCTGAAGAAACCATATATGCCTGTATTTTATCC  
ERR244146.64167387.2+ tgtttcttttccatTTTGTGTTCCAGTTGAAGAAACCATATATGCCTGTATCTTTATCC  
ERR244146.68666943.2+ tgtttcttttccatTTTGTGTTCCAGTTGAAGAAACCATATATGCCTGTATCTTTATCC  
ERR244146.75918108.1- t--ttcttttccatTTTGTGTTCTGGCTGAAGATAACCATATATGCCTGTATTTTATCC  
ERR244146.77596753.1+ t--ttcttttccatTTTGTGTTCTGGCTGAAGAAACCATATATGCCTGTATTTTATCC  
ERR244146.87059851.2- tgtttcttttccatTTTGTGTTCCAGTTGAAGAAACCATATATGCCTGTATCTTTATCC  
ERR244146.90665826.1- t--ttcttttccatTTTGTGTTCTGGCTGAAGAAACCATATATGCCTGTATTTTATCC  
ERR244146.91490918.1+ tgtttcttttccatTTTGTGTTCCAGTTGAAGAAACCATATATGCCTGTATCTTTATCC  
ERR244146.9290774.1+ tgtttcttttccatTTTGTGTTCCAGTTGAAGAAACCATATATGCCTGTATCTTTATCC  
ERR244146.97675664.1+ t--ttcttttccatTTTGTGTTCTGGCTGAAGAAACCATATATGCCTGTATTTTATCC  
ERR244147.10275342.2- t--ttcttttccatTTTGTGTTCTGGCTGAAGAAACCATATATGCCTGTATTTTATCC  
ERR244147.121272221.1- tgtttcttttccatTTTGTGTTCCAGTTGAAGAAACCATATATGCCTGTATCTTTATCC  
ERR244147.12202203.1+ t--ttcttttccatTTTGTGTTCTGGCTGAAGAAACCCATATATGCCTGTAGTTTATCC  
ERR244147.132045579.1- t--ttcttttccatTTTGTGTTCTGGCTGAAGAAACCATATATGCCTGTATTTTATCC  
ERR244147.136713187.1+ tgtttcttttccatTTTGTGTTCTGGCTGAAGAAACCATATATGCCTGTATTTTATCC  
ERR244147.15961227.2+ tgtttcttttccatTTTGTGTTCTGGCTGAAGAAACCATATATGCCTGTATTTTATCC  
ERR244147.17572057.2- tgtttcttttccatTTTGTGTTCCAGTTGAAGAAACCATATATGCCTGTATCTTTATCC  
ERR244147.22728488.1- t--ttcttttccatTTTGTGTTCTGGCTGAAGAAACCATATATGCCTGTATTTTATCC  
ERR244147.25647165.2- t--ttcttttccatTTTGTGTTCTGGCTGAAGAAACCATATATGCCTGTATTTTATCC  
ERR244147.4157084.1+ tgtttcttttccatTTTGTGTTCCAGTTGAAGAAACCATATATGCCTGTATCTTTATCC  
ERR244147.69941180.1- t--ttcttttccatTTTGTGTTCTGGCTGAAGAAACCATATATGCCTGTATTTTATCC  
ERR244147.77801619.2- tgtttcttttccatTTTGTGTTCTGGCTGAAGAAACCATATATGCCTGTATTTTATCC  
ERR244147.82193546.1- t--ttcttttccatTTTGTGTTCTGGCTGAAGAAACCATATATGCCTGTATTTTATCC  
ERR244148.41993600.2- tgtttcttttccatTTTGTGTTCTGGCTGAAGAAACCATATATGCCTGTATTTTATCC  
ERR244148.51037509.1+ t--ttcttttccatTTTGTGTTCTGGCTGAAGAAACCATATATGCCTGTATTTTATCC  
ERR244148.6823651.1- tgtttcttttccatTTTGTGTTCTGGCTGAAGAAACCATATATGCCTGTATTTTATCC  
ERR244149.25775136.1+ t--ttcttttccatTTTGTGTTCTGGCTGAAGAAACCATATATGCCTGTATTTTATCC  
ERR244150.15347188.2+ tgtttcttttccatTTTGTGTTCCAGTTGAAGAAACCATATATGCCTGTATCTTTATCC  
ERR244150.442652.1+ t--ttcttttccatTTTGTGTTCTGGCTGAAGAAACCATATATGCTGTATTTTATCC  
ERR244151.17502359.2- t--ttcttttccatTTTGTGTTCTGGCTGAAGAAACCATATATGCCTGTATTTTATCC  
ERR244151.777093.1+ t--ttcttttccatTTTGTGTTCTGGCTGAAGAAACCATATATGCCTGTATTTTATCC  
ERR244152.2384579.1+ tgtttcttttccatTTTGTGTTCTGGCTGAAGAAACCATATATGCCTGTATTTTATCC  
ERR244152.73646274.1+ tgtttcttttccatTTTGTGTTCTGGCTGAAGAAACCATATATGCCTGTATTTTATCC  
ERR244153.55115941.2+ tgtttcttttccatTTTGTGTTCTGGCTGAAGAAACCATATATGCCTGTATTTTATCC  
ERR244156.120584320.1+ tgtttcttttccatTTTGTGTTCTGGCTGAAGAAACCATATATGCCTGTATTTTATCC  
ERR244156.123492829.2+ t--ttcttttccatTTTGTGTTCTGGCTGAAGAAACCATATATGCCTGTATTTTATCC  
ERR244156.130034420.1+ tgtttcttttccatTTTGTGTTCCAGTTGAAGAAACCATATATGCCTGTATCTTTATCC  
ERR244156.134587516.1- tgtttcttttccatTTTGTGTTCCAGTTGAAGAAACCATATATGCCTGTATCTTTATCC  
ERR244156.154736233.1+ tgtttcttttccatTTTGTGTTCTGGCTGAAGAAACCATATATGCCTGTATTTTATCC  
ERR244156.16052576.1- tgtttcttttccatTTTGTGTTCCAGTTGAAGAAACCATATATGCCTGTATCTTTATCC  
ERR244156.162215319.2+ tgtttcttttccatTTTGTGTTCTGGCTGAAGAAACCATATATGCCTGTATTTTATCC  
ERR244156.17686513.1- tgtttcttttccatTTTGTGTTCCAGTTGAAGAAACCATATATGCCTGTATCTTTATCC  
ERR244156.27908911.1- tgtttcttttccatTTTGTGTTCTGGCTGAAGAAACCATATATGCCTGTATCTTTATCC  
ERR244156.38707225.2+ tgtttcttttccatTTTGTGTTCCAGTTGAAGAAACCATATATGCCTGTATCTTTATCC  
ERR244156.39426149.2+ t--ttcttttccatTTTGTGTTCTGGCTGAAGAAACCATATATGCCTGTATTTTATCC  
ERR244156.40198159.1- t--ttcttttccatTTTGTGTTCTGGCTGAAGAAACCATATATGCCTGTATTTTATCC  
ERR244156.47741673.1+ tgtttcttttccatTTTGTGTTCTGGCTGAAGAAACCATATATGCCTGTATTTTATCC  
ERR244156.61862812.2+ tgtttcttttccatTTTGTGTTCCAGTTGAAGAAACCATATATGCCTGTATCTTTATCC  
ERR244156.88532666.2- tgtttcttttccatTTTGTGTTCCAGTTGAAGAAACCATATATGCCTGTATCTTTATCC  
ERR244157.12232170.1- t--ttcttttccatTTTGTGTTCTGGCTGAAGAAACCATATATGCCTGTATTTTATCC  
ERR244157.16960720.2- tgtttcttttccatTTTGTGTTCTGGCTGAAGAAACCATATATGCCTGTATTTTATCC

ERR244157.2304262.1- t--ttcttttccatTTTGTGTTCTGCCTGAAGAAACCATATATGCCTGTATTTTTATCC  
ERR244157.24672276.1+ tgtttcttttccatTTTGTGTTCCAGTTGAAGAAACCATATATGCCTGTATCTTTATCC  
ERR244157.28744060.1+ t--ttcttttccatTTTGTGTTCTGGCTGACGAAACCATATATGCCTGTATTTTTATCC  
ERR244157.40217339.2+ tgtttcttttccatTTTGTGTTCCAGTTGAAGAAACCATATATGCCTGTATCTTTATCC  
ERR244157.68534216.2+ t--ttcttttccatTTTGTGTTCTGGCTGAAGAAACCATATAAGCCTGTATTTTTATCC  
ERR244157.71374123.1+ tgtttcttttccatTTTGTGTTCCAGTTGAAGAAACCATATATGCCTGTATCTTTATCC  
ERR244157.83398179.2- t--ttcttttccatTTTGTGTTCTGGCTGAAGAAACCATATATGCCTGTATTTTTATCC  
ERR244157.83604973.1+ tgtttcttttccatTTTGTGTTCCAGTTGAAGAAACCATATATGCCTGTATCTTTATCC  
ERR244157.88933338.1+ tgtttcttttccatTTTGTGTTCTGGCTGAAGAAACCATATATGCCTGTATTTTTATCC  
ERR244158.12039058.1+ tgtttcttttccatTTTGTGTTCCAGTTGAAGAAACCATATATGCCTGTATCTTTATCC  
ERR244158.12904674.1- tgtttcttttccatTTTGTGTTCCAGTTGAAGAAACCATATATGCCTGTATCTTTATCC  
ERR244158.14530390.1- tgtttcttttccatTTTGTGTTCCAGTTGAAGAAACCATATATGCCTGTATCTTTATCC  
ERR244158.23421992.2+ tgtttcttttccatTTTGTGTTCCAGTTGAAGAAACCATATATGCCTGTATCTTTATCC  
ERR244158.26979419.2- tgtttcttttccatTTTGTGTTCCAGTTGAAGAAACCATATATGCCTGTATCTTTATCC  
ERR244158.28053158.1+ tgtttcttttccatTTTGTGTTCCAGTTGAAGAAACCATATATGCCTGTATCTTTATCC  
ERR244158.31623411.1+ t--ttcttttccatTTTGTGTTCTGGCTTAAGAAACCATATATGCCTGTATTTTTATCC  
ERR244158.40825569.2- tgtttcttttccatTTTGTGTTCCAGTTGAAGAAACCATATATGCCTGTATCTTTATCC  
ERR272293.162385.2- t--ttcttttccatTTTGTGTTCTGGCTGAAGAAACCATATATGCCTGTATTTTTATCC  
ERR272293.163306.2- t--ttcttttccatTTTGTGTTCTGGCTGAAGAAACCATATATGCCTGTATTTTTATCC  
ERR272314.115165.2+ t--ttcttttccatTTTGTGTTCTGGCTGAAGAAACCATATATGCCTGTATTTTTATCC  
ERR272317.118222.2- t--ttcttttccatTTTGTGTTCTGGCTGAAGAAACCATATATGCCTGTATTTTTATCC  
ERR272334.112347.2- tgtttcttttccatTTTGTGTTCCAGTTGAAGAAACCATATATGCCTGTATCTTTATCC  
ERR272354.158567.2- tgtttcttttccatTTTGTGTTCCAGTTGAAGAAACCATATATGCCTGTATCTTTATCC  
ERR272355.315072.2- tgtttcttttccatTTTGTGTTCCAGTTGAAGAAACCATATATGCCTGTATCTTTATCC  
ERR272362.246723.2+ tgtttcttttccatTTTGTGTTCCAGTTGAAGAAACCATATATGCCTGTATCTTTATCC  
ERR272362.295779.2+ tgtttcttttccatTTTGTGTTCCAGTTGAAGAAACCATATATGCCTGTATCTTTATCC  
ERR272369.398363.2+ tgtttcttttccatTTTGTGTTCCAGTTGAAGAAACCATATATGCCTGTATCTTTATCC  
ERR272369.424797.2+ tgtttcttttccatTTTGTGTTCCAGTTGAAGAAACCATATATGCCTGTATCTTTATCC  
ERR272370.311833.2+ t--ttcttttccatTTTGTGTTCTGGCTGAAGAAACCATATATGCCTGTATTTTTATCC  
ERR272379.96933.2+ tgtttcttttccatTTTGTGTTCCAGTTGAAGAAACCATATATGCCTGTATCTTTATCC  
ERR272380.163688.2+ tgtttcttttccatTTTGTGTTCCAGTTGAAGAAACCATATATGCCTGTATCTTTATCC  
ERR272388.192361.4- tgtttcttttccatTTTGTGTTCCAGTTGAAGAAACCATATATGCCTGTATCTTTATCC  
ERR272410.221315.2- t--ttcttttccatTTTGTGTTCTGGCTGAAGAAACCATATATGCCTGTATTTTTATCC  
ERR244145.102457280.2- tttcttttccatTGTGCTGTTCCAGTTGAAGAAACCATATATGCCTGTATCTTTATCC  
ERR244146.143998000.1+ tttcttttccatTTTGTGTTCCAGTTGAAGAAACCATATATGCCTGTATCTTTATCC  
ERR244147.125423016.1- tttcttttccatTTTGTGTTCCAGTTGAAGAAACCATATATGCCTGTATCTTTATCC  
ERR244151.49224522.1- tttcttttccatTTTGTGTTCCAGTTGAAGAAACCATATATGCCTGTATCTTTATCC  
ERR244156.123104822.1- tttcttttccatTTTGTGTTCCAGTTGAAGAAACCATATATGCCTGTATCTTTATCC  
ERR244156.158051380.1- tttcttttccatTTTGTGTTCCAGTTGAAGAAACCATATATGCCTGTATCTTTATCC  
ERR244145.28586638.1+ tttcttttccatTTTGTGTTCCAGTTGAAGAAACCATATATGCCTGTATCTTTATCC  
ERR244146.87320608.2- tttcttttccatTTTGTGTTCCAGTTGAAGAAACCATATATGCCTGTATCTTTATCC  
ERR244153.60364740.2+ tttcttttccatTTTGTGTTCTGGCTGAAGAAACCATATATGCCTGTATTTTTATCC  
ERR244153.61154323.2+ tttcttttccatTTTGTGTTCTGGCTGAAGAAACCATATATGCCTGTATTTTTATCC  
ERR244153.76184448.2+ tttcttttccatTTTGTGTTCTGGCTGAAGAAACCATATATGCCTGTATTTTTATCC  
ERR244146.17188823.2- tttcttttccatTTTGTGTTCTGGCTGAAGAAACCATATATGCCTGTATTTTTATCC  
ERR244151.2144457.2+ tttcttttccatTTTGTGTTCTGGCTGAAGAAACCATATATGCCTGTATTTTTATCC  
ERR244151.27783561.2+ tttcttttccatTTTGTGTTCTGGCTGAAGAAACCATATATGCCTGTATTTTTATCC  
ERR244151.87450210.2+ tttcttttccatTTTGTGTTCTGGCTGAAGAAACCATATATGCCTGTATTTTTATCC  
ERR244152.19946562.2+ tttcttttccatTTTGTGTTCCAGTTGAAGAAACCATATATGCCTGTATCTTTATCC  
ERR244152.93570614.2+ tttcttttccatTTTGTGTTCCAGTTGAAGAAACCATATATGCCTGTATCTTTATCC  
ERR244151.24279433.1+ tttcttttccatTTTGTGTTCCAGTTGAAGAAACCATATATGCCTGTATCTTTATCC  
ERR244151.5056026.1+ tttcttttccatTTTGTGTTCCAGTTGAAGAAACCATATATGCCTGTATCTTTATCC  
ERR244151.59631049.1+ tttcttttccatTTTGTGTTCCAGTTGAAGAAACCATATATGCCTGTATCTTTATCC  
ERR244152.29166132.2- tttcttttccatTTTGTGTTCCAGTTGAAGAAACCATATATGCCTGTATCTTTATCC  
ERR244145.99102567.2+ tttcttttccatTTTGTGTTCCAGTTGAAGAAACCATATATGCCTGTATCTTTATCC  
ERR244145.85866834.2+ tttcttttccatTTTGTGTTCCAGTTGAAGAAACCATATATGCCTGTATCTTTATCC  
ERR244158.44889252.2+ atTTTGTGTTCCAGTTGAAGAAACCATATATGCCTGTATCTTTATCC  
ERR244146.32662140.2+ tTTTGTGTTCTGGCTGAAGAAACCATATATGCCTGTATTTTTATCC  
ERR244150.49425094.1- TTTGCTGTTCTGGCTGAAGAAACCATATATGCCTGTATTTTTATCC  
ERR244149.74274799.1- TTGCTGTTCTGGCTGAAGAAACCATATATGCCTGTATTTTTATCC  
ERR244156.75594749.1- TTGCTGTTCCAGTTGAAGAAACCATATATGCCTGTATCTTTATCC  
ERR244152.58273483.2+ TGCTGTTCCAGTTGAAGAAACCATATATGCCTGTATCTTTATCC  
ERR244156.172438389.1+ TGCTGTTCTGGCTGAAGAAACCATATATGCCTGTATTTTTATCC  
ERR244145.106184922.2- GCTGTTCTGGCTGAAGAAACCATATATGCCTGTATTTTTATCC  
ERR244156.35228088.1- CTGTTCTGGCTGAAGAAACCATATATGCCTGTATTTTTATCC  
ERR244156.98634684.1- CTGTTCTGGCTGAAGAAACCATATATGCCTGTATTTTTATCC  
ERR244149.86112113.1- TGTTCAGTTGAAGAAACCATATATGCCTGTATCTTTATCC  
ERR244156.71030092.1+ TGTTCTGGCTGAAGAAACCATATATGCCTGTATTTTTATCC  
ERR244156.8380816.1+ TGTTCTGGCTGAAGAAACCATATATGCCTGTATTTTTATCC  
ERR244157.76016802.2- TGTTCCAGTTGAAGAAACCATATATGCCTGTATCTTTATCC  
ERR244151.4381639.2+ GTTCCAGTTGAAGAAACCATATATGCCTGTATCTTTATCC  
ERR244151.46039351.2+ GTTCCAGTTGAAGAAACCATATATGCCTGTATCTTTATCC  
ERR244147.108026216.2- TTCTGGCTGAAGAAACCATATATGCCTGTATTTTTATCC  
ERR244147.114799832.2- TTCCAGTTGAAGAAACCATATATGCCTGTATCTTTATCC  
ERR244147.141632726.1+ TTCTGGCTGAAGAAACCATATATGCCTGTATTTTTATCC  
ERR244147.89284177.1- TCCAGTTGAAGAAACCATATATGCCTGTATCTTTATCC  
ERR244149.90514765.1+ CTGGCTGAAGAAACCATATATGCCTGTATTTTTATCC  
ERR244152.91031925.1+ CTGGCTGAAGAAACCATATATGCCTGTATTTTTATCC  
ERR244153.20887662.1+ CTGGCTGAAGAAACCATATATGCCTGTATTTTTATCC  
ERR244153.21581689.1+ CTGGCTGAAGAAACCATATATGCCTGTATTTTTATCC  
ERR244156.132035253.1- CCAGTTGAAGAAACCATATATGCCTGTATCTTTATCC  
ERR244145.22441587.1- CAGTTCAAGAAACCATATATGCCTGTATCTTTATCC  
ERR244147.127947064.1+ TGGCTGAAGAAACCATATATGCCTGTATTTTTATCC  
ERR244148.62507049.1- TGGCTGAAGAAACCATATATGCCTGTATTTTTATCC

ERR244149.12363331.2-  
ERR244150.74716954.2-  
ERR244146.41255339.1+  
ERR244147.2040343.1-  
ERR244150.64900968.2-  
ERR244151.38435986.1-  
ERR244145.150059830.1+  
ERR244147.113261504.2-  
ERR244148.54289957.2+  
ERR244151.22847956.1-  
ERR244156.22399241.1+  
ERR244153.31128811.2+  
ERR244147.480761.1+  
ERR244151.37870396.1+  
ERR244151.72885524.1+  
ERR244151.7519035.1+  
ERR244151.84144004.1+  
ERR244156.141617992.2-  
ERR244145.161060100.1-  
ERR244145.63687745.2-  
ERR244157.81766401.1+  
ERR244157.22087889.1+  
ERR244157.38131372.1+  
ERR244147.51409415.2-  
ERR244147.81087395.1+  
ERR244145.46643170.1-  
ERR272418.23402.2+  
ERR244147.15526174.2-  
ERR244153.20163228.1-  
ERR272417.79284.2+  
ERR244145.30608194.1-  
ERR244146.44976138.2+  
ERR244150.13115232.2-  
ERR244151.86796295.1-  
ERR244154.2336237.1-  
ERR244154.49322334.1-  
ERR244154.72463811.1-  
ERR244154.73689221.1-  
ERR244154.74065131.1-  
ERR244156.61862812.1-  
ERR244156.148284162.2+  
ERR244156.156625878.2+  
ERR244146.92455626.2-  
ERR244148.51730682.2-  
ERR244147.97325321.1+  
ERR244146.59569612.1-  
ERR244156.50761240.2-  
ERR244149.56907293.2+  
ERR244153.2875418.1-  
ERR244153.6010620.1-  
ERR244153.77080599.1-  
ERR244153.84972404.1-  
ERR244157.24600673.2-  
ERR244158.14554932.2-  
ERR244158.3507344.1-  
ERR244158.39975997.2-  
ERR244145.28586638.2-  
ERR244146.39980490.1-  
ERR244146.135918198.2+  
ERR244153.20196093.2-  
ERR244153.664339.2-  
ERR244147.72973498.2-  
ERR272416.127715.2+  
ERR244156.75407830.2+  
ERR244148.1793981.2-  
ERR244156.114525817.2-  
ERR244156.123492829.1-  
ERR244157.7672243.1+  
ERR244149.71739235.1+  
ERR244156.27153515.2+

TGGCTGAAGAAACCATATATGCCTGTATTTTTATCC  
TGGCTGAAGAAACCATATATGCCTGTATTTTTATCC  
AGTTGAAGAAACCATATATGCCTGTATCTTTATCC  
AGTTCAAGAAACCATATATGCCTGTATCTTTATCC  
GTTGAAGAAACCATATATGCCTGTATCTTTATCC  
GCTGAAGAAACCATATATGCCTGTATTTTTATCC  
TTGAAGAAACCATATATGCCTGTATCTTTATCC  
CTGAAGAAACCATATATGCCTGTATTTTTATCC  
CTGAAGAAACCATATATGCCTGTATTTTTATCC  
TTGAAAAAACCATATATGCCTGTATCTTTATCC  
CTGAAGAAACCATATATGCCTGTATTTTTATCC  
TGAAGAAACCATATATGCCTGTATCTTTATCC  
GAAGAAACCATATATGCCTGTATCTTTATCC  
GAAGAAACCATATATGCCTGTATCTTTATCC  
GAAGAAACCATATATGCCTGTATCTTTATCC  
GAAGAAACCATATATGCCTGTATCTTTATCC  
GAAGAAACCATATATGCCTGTATCTTTATCC  
AAGAAACCATATATGCCTGTATTTTTATCC  
AAGAAACCATATATGCCTGTATTTTTATCC  
AAGAAACCATATATGCCTGTATTTTTATCC  
AGAAACCATATATGCCTGTATTTTTATCC  
AGAAACCATATATGCCTGTATTTTTATCC  
AAACCATATATGCCTGTATTTTTATCC  
AAACCATATATGCCTGTATCTTTATCC  
ACCATATATGCCTGTATTTTTATCC  
ACCATATATGCCTGTATCTTTATCC  
CCATATATGCCTGTATTTTTATCC  
CCATATATGCCTGTATCTTTATCC  
CCATATATGCCTGTATCTTTATCC  
CATATATGCCTGTATTTTTATCC  
ATATATGCCTGTATCTTTATCC  
ATATATGCCTGTATCTTTATCC  
TATATGCCTGTATTTTTATCC  
TATATGCCTGTATCTTTATCC  
TATATGCCTGTATCTTTATCC  
TATATGCCTGTATCTTTATCC  
TATATGCCTGTATCTTTATCC  
TATATGCCTGTATCTTTATCC  
TATGCCTGTATCTTTATCC  
TATGCCTGTATCTTTATCC  
ATGCCTGTATTTTTATCC  
ATGCCTGTATCTTTATCC  
TGCCTGTATCTTTATCC  
CCTGTATCTTTATCC  
CTGTATTTTTATCC  
TGTATCTTTATCC  
GTATCTTTATCC  
GTATCTTTATCC  
GTATCTTTATCC  
GTATTTTTATCC  
GTATTTTTATCC  
GTATTTTTATCC  
GTATTTTTATCC  
TATCTTTATCC  
TATCTTTATCC  
ATCTTTATCC  
ATTTTTATCC  
ATTTTTATCC  
TCTTTATGC  
TCTTTATCC  
CTTTATCC  
TTTATCC  
TTTATCC  
TTATCC  
TTATCC  
TCC  
TCC

consensus

tgtttcttttccatTTTGCTGTTCTGGCTGAAGAAACCATATATGCCTGTATCTTTATCC

ERR244156.123492829.2+  
ERR244156.88532666.2-  
ERR244146.68666943.2+  
ERR244151.777093.1+  
ERR244146.103365155.1-  
ERR244149.25775136.1+  
ERR244150.442652.1+  
ERR244156.130034420.1+  
ERR244157.28744060.1+  
ERR244147.12202203.1+

C  
C  
CAT  
CAT  
CATT  
CATT  
CATT  
CATTG  
CATTG  
CATTGT

ERR244147.4157084.1+ CATTGT  
ERR244158.40825569.2- CATTGT  
ERR244147.22728488.1- CATTGTC  
ERR244147.25647165.2- CATTGTC  
ERR244151.17502359.2- CATTGTC  
ERR244156.61862812.2+ CATTGTC  
ERR244146.124845523.2- CATTGTCAA  
ERR244147.17572057.2- CATTGTCAA  
ERR244158.26979419.2- CATTGTCAA  
ERR244146.140222926.2+ CATTGTCAAGC  
ERR244157.83398179.2- CATTGTCAAGCA  
ERR244146.146536627.2- CATTGTCAAGCAG  
ERR244145.46160951.1+ CATTGTCAAGCAGAA  
ERR244145.57384943.2+ CATTGTTAAGCAGAAA  
ERR244156.39426149.2+ CATTGTCAAGCAGAAA  
ERR244157.2304262.1- CATTGTCAAGCAGAAA  
ERR244146.91490918.1+ CATTGTCCAGCAGAAAC  
ERR244156.38707225.2+ CATTGTCAAGCAGAAAC  
ERR244148.51037509.1+ CATTGTCAAGCAGAAACA  
ERR244145.127347530.2+ CATTGTCAAGCAGAAACACC  
ERR244145.37775792.1- CATTGTCAAGCAGAAACACCAT  
ERR244157.83604973.1+ CATTGTCAAGCAGAAACACCAT  
ERR244148.6823651.1- CATTGTCAAGCAGAAACACCATT  
ERR244146.29560179.1- CATTGTCAAGCAGAAACACCATTA  
ERR244146.52725920.1- CATTGTCAAGCAGAAACACCATTA  
ERR244153.55115941.2+ CATTGTCAAGCAGAAACACCATTA  
ERR244158.31623411.1+ CATTGTCAAGCAGAAACACCATTA  
ERR244145.102457280.1+ CATTGTCAAGCAGAAACCGCCATTAT  
ERR244145.110237827.2- CATTGTCAAGCAGAAACACCATTATC  
ERR244145.96068630.1- CATTGTCAAGCAGAAACACCATTATC  
ERR244146.90665826.1- CATTGTCAAGCAGAAACACCATTATC  
ERR244148.41993600.2- CATTGTCAAGCAGAAACACCATTATC  
ERR244146.87059851.2- CATTGTCAAGCAGAAACACCATTATCT  
ERR244156.16052576.1- CATTGTCAAGCAGAAACACCATTATCT  
ERR244157.24672276.1+ CATTGTCAAGCAGAAACACCATTATCT  
ERR244157.68534216.2+ CATTGTCAAGCAGAAACACCATTATCT  
ERR244145.39604221.2- CATTGTCAAGCAGAAACACCATTATCTA  
ERR244150.15347188.2+ CATTGTCAAGCAGAAACACCATTATCTA  
ERR244152.2384579.1+ CATTGTCAAGCAGAAACACCATTATCTA  
ERR244152.73646274.1+ CATTGTCAAGCAGAAACACCATTATCTA  
ERR244156.40198159.1- CATTGTCAAGCAGAAACACCATTATCTA  
ERR244158.28053158.1+ CATTGTCAAGCAGAAACACCATTATCTA  
ERR244156.134587516.1- CATTGTCAAGCAGAAACACCATTATCTACAA  
ERR244151.49224522.1- CATTGTCAAGCAGAAACACCATTATCTACAAAG  
ERR244158.12039058.1+ CATTGTCAAGCAGAAACACCATTATCTACAAAG  
ERR244158.14530390.1- CATTGTCAAGCAGAAACACCATTATCTACAAAG  
ERR244146.150494649.2- CATTGTCAAGCAGAAACACCATTATCTACAAAGg  
ERR244156.1622156319.2+ CATTGTCAAGCAGAAACACCATTATCTACAAAGg  
ERR244156.17686513.1- CATTGTCAAGCAGAAACACCATTATCTACAAAGg  
ERR244157.88933338.1+ CATTGTCAAGCAGAAACACCATTATCTACAAAGg  
ERR244156.154736233.1+ CATTGTCAAGCAGAAACACCATTATCTACAAAGgt  
ERR244157.16960720.2- CATTGTCAAGCAGAAACACCATTATCTACAAAGgt  
ERR244146.118918090.2- CATTGTCAAGCAGAAACACCATTATCTACAAAGgta  
ERR244156.27908911.1- CATTGTCAAGCAGAAACACCATTATCTACAAAGgtaa  
ERR244156.47741673.1+ CATTGTCAAGCAGAAACACCATTATCTACAAAGgtaa  
ERR244157.40217339.2+ CATTGTCAAGCAGAAACACCATTATCTACAAAGgtaa  
ERR244146.97675664.1+ CATTGTCAAGCAGAAACAGCATTATCTACAAAGgtaaa  
ERR244153.60364740.2+ CATTGTCAAGCAGAAACACCATTATCTACAAAGgtaaa  
ERR244153.61154323.2+ CATTGTCAAGCAGAAACACCATTATCTACAAAGgtaaa  
ERR244153.76184448.2+ CATTGTCAAGCAGAAACACCATTATCTACAAAGgtaaa  
ERR244156.120584320.1+ CATTGTCAAGCAGAAACACCATTATCTACAAAGgtaaa  
ERR244145.19972568.2- CATTGTCAAGCAGAAACACCATTATCTACAAAGgtaaat  
ERR244146.107304693.2+ CATTGTCAAGCAGAAACACCATTATCTACAAAGggaat  
ERR244147.82193546.1- CATTGTCAAGCAGAAACACCATTATCTACAAAGgtaaat  
ERR244151.2144457.2+ CATTGTCAAGCAGAAACACCATTATCTACAAAGgtaaat  
ERR244151.27783561.2+ CATTGTCAAGCAGAAACACCATTATCTACAAAGgtaaat  
ERR244151.87450210.2+ CATTGTCAAGCAGAAACACCATTATCTACAAAGgtaaat  
ERR244152.19946562.2+ CATTGTCAAGCAGAAACACCATTATCTACAAAGgtaaat  
ERR244152.93570614.2+ CATTGTCAAGCAGAAACACCATTATCTACAAAGgtaaat  
ERR244151.24279433.1+ CATTGTCAAGCAGAAACACCATTATCTACAAAGgtaaat  
ERR244151.5056026.1+ CATTGTCAAGCAGAAACACCATTATCTACAAAGgtaaat  
ERR244151.59631049.1+ CATTGTCAAGCAGAAACACCATTATCTACAAAGgtaaat  
ERR244152.29166132.2- CATTGTCAAGCAGAAACACCATTATCTACAAAGgtaaat  
ERR244157.71374123.1+ CATTGTCAAGCAGAAACACCATTATCTACAAAGgtaaat  
ERR244158.23421992.2+ CATTGTCAAGCAGAAACACCATTATCTACAAAGgtaaat  
ERR244145.22441587.2+ CATTGTCAAGCAGAAACACCATTATCTACAAAGgtaaat  
ERR244145.89602273.1- CATTGTCAAGCAGAAACACCATTATCTACAAAGgtaaat  
ERR244146.143563595.1- CATTGTCAAGCAGAAACACCATTATCTACAAAGgtaaat  
ERR244156.123104822.1- CATTGTCAAGCAGAAACACCATTATCTACAAAGgtaaat  
ERR244156.158051380.1- CATTGTCAAGCAGAAACACCATTATCTACAAAGgtaaat  
ERR244146.109494033.2+ CATTGTCAAGCAGAAACACCATTATCTACAAAGgtaaat  
ERR244150.49425094.1- CATTGTCAAGCAGAAACACCATTATCTACAAAGgtaaat  
ERR244149.74274799.1- CATTGTCAAGCAGAAACACCATTATCTACAAAGgtaaat  
ERR244147.69941180.1- CATTGTCAAGCAGAAACACCATTATCTACAAAGgtaaat



ERR244147.72973498.2- CATGATCAAGCAGAAACACCATTATCAACAAGgtaaatTTtcaggcttggcacaactgag  
ERR244147.77801619.2- CATTGTCAAGCAGAAACACCATTATCTACAAGgtaaatTTtcaggcttTgtcacaactgag  
ERR244147.81087395.1+ CATTGTCAAGCAGAAACACCATTATCTACAAGgtaaatTTtcaggcttTgtcacaactgag  
ERR244147.89284177.1- CATTGTCAAGCAGAAACACCATTATCTACAAGgtaaatTTtcaggcttTgtcacaactgag  
ERR244147.97325321.1+ CATTGTCAAGCAGAAACACCATTATCTATAAGgtaaatTTtcaggcttTgtcacaactgag  
ERR244148.1793981.2- CATTGTCAAGCAGAAACACCATTATCTACAAGgtaaatTTtcaggcttTgtcacaactgag  
ERR244148.51730682.2- CATTGTCAAGCAGAAACACCATTATCTACAAGgtaaatTTtcaggcttTgtcacaactgag  
ERR244149.56907293.2+ CATTGTCAAGCAGAAACACCATTATCTACAAGgtaaatTTtcaggcttTgtcacaactgag  
ERR244149.71739235.1+ CATTGTCAAGCAGAAACACCATTATCTACAAGgtaaatTTtcaggcttTgtcacaactgag  
ERR244150.13115232.2- CATTGTCAAGCAGAAACACCATTATCTACAAGgtaaatTTtcaggcttTgtcacaactgag  
ERR244151.86796295.1- CATTGTCAAGCAGAAACACCATTATCTACAAGgtaaatTTtcaggcttTgtcacaactgag  
ERR244153.20163228.1- CATTGTCAAGCAGAAACACCATTATCTACAAGgtaaatTTtcaggcttTgtcacaactgag  
ERR244153.20196093.2- CATTGTCAAGCAGAAACACCATTATCTACAAGgtaaatTTtcaggcttTgtcacaactgag  
ERR244153.2875418.1- CATTGTCAAGCAGAAACACCATTAGCTACAAGgtaaatTTtcaggcttTgtcacaactgag  
ERR244153.6010620.1- CATTGTCAAGCAGAAACACCATTATCTACAAGgtaaatTTtcaggcttTgtcacaactgag  
ERR244153.664339.2- CATTGTCAAGCAGAAACACCATTATCTACAAGgtaaatTTtcaggcttTgtcacaactgag  
ERR244153.77080599.1- CATTGTCAAGCAGAAACACCATTATCTACAAGgtaaatTTtcaggcttTgtcacaactgag  
ERR244153.84972404.1- CATTGTCAAGCAGAAACACCATTATCTACAAGgtaaatTTtcaggcttTgtcacaactgag  
ERR244154.2336237.1- CATTATCAAGCAGAAACACCATTATCTACAAGgtaaatTTtcaggcttTgtcacaactgag  
ERR244154.49322334.1- CATTGTCAAGCAGAAACACCATTATCTACAAGgtaaatTTtcaggcttTgtcacaactgag  
ERR244154.72463811.1- CATTGTCAAGCAGAAACACCATTATCTACAAGgtaaatTTtcaggcttTgtcacaactgag  
ERR244154.73689221.1- CATTGTCAAGCAGAAACACCATTATCTACAAGgtaaatTTtcaggcttTgtcacaactgag  
ERR244154.74065131.1- CATTGTCAAGCAGAAACACCATTATCTACAAGgtaaatTTtcaggcttTgtcacaactgag  
ERR244156.114525817.2- CATTGTCAAGCAGAAACACCATTATCTACAAGgtaaatTTtcaggcttTgtcacaactgag  
ERR244156.123492829.1- CATTGTCAAGCAGAAACACCATTATCTACAAGgtaaatTTtcaggcttTgtcacaactgag  
ERR244156.132035253.1- CATTGTCAAGCAGAAACACCATTATCTACAAGgtaaatTTtcaggcttTgtcacaactgag  
ERR244156.141617992.2- CATTGTCAAGCAGAAACACCATTATCTACAAGgtaaatTTtcaggcttTgtcacaactgag  
ERR244156.148284162.2+ CATTGTCAAGCAGAAACACCATTATCTACAAGgtaaatTTtcaggcttTgtcacaactgag  
ERR244156.156625878.2+ CATTGTCAAGCAGAAACACCATTATCTACAAGgtaaatTTtcaggcttTgtcacaactgag  
ERR244156.22399241.1+ CATTGTCAAGCAGAAACACCATTATCTACAAGgtaaatTTtcaggcttTgtcacaactgag  
ERR244156.27153515.2+ CATTGTCAAGCAGAAACACCATTATCTACAAGgtaaatTTtcaggcttTgtcacaactgag  
ERR244156.39426149.1- CATTGTCAAGCAGAAACACCATTATCTACAAGgtaaatTTtcaggcttTgtcacaactgag  
ERR244156.50761240.2- CATTGTCAAGCAGAAACACCATTATCTACAAGgtaaatTTtcaggcttTgtcacaactgag  
ERR244156.61862812.1+ CATTGTCAAGCAGAAACACCATTATCTACAAGgtaaatTTtcaggcttTgtcacaactgag  
ERR244156.71030092.1+ CATTGTCAAGCAGAAACACCATTATCTACAAGgtaaatTTtcaggcttTgtcacaactgag  
ERR244156.75407830.2+ CATTGTCAAGCAGAAACACCATTATCTACAAGgtaaatTTtcaggcttTgtcacaactgag  
ERR244156.8380816.1+ CATTGTCAAGCAGAAACACCATTATCTACAAGgtaaatTTtcaggcttTgtcacaactgag  
ERR244157.22087889.1+ CATTGTCAAGCAGAAACACCATTATCTACAAGgtaaatTTtcaggcttTgtcacaactgag  
ERR244157.24600673.2- CATTGTCAAGCAGAAACACCATTATCTACAAGgtaaatTTtcaggcttTgtcacaactgag  
ERR244157.38131372.1+ CATTGTCAAGCAGAAACACCATTATCTACAAGgtaaatTTtcaggcttTgtcacaactgag  
ERR244157.7672243.1+ CATTGTCAAGCAGAAACACCATTATCTACAAGgtaaatTTtcaggcttTgtcacaactgag  
ERR244157.81766401.2+ CATTGTCAAGCAGAAACACCATTATCTACAAGgtaaatTTtcaggcttTgtcacaactgag  
ERR244158.14554932.2- CATTGTCAAGCAGAAACACCATTATCTACAAGgtaaatTTtcaggcttTgtcacaactgag  
ERR244158.3507344.1- CATTGTCAAGCAGAAACACCATTATCTACAAGgtaaatTTtcaggcttTgtcacaactgag  
ERR244158.39975997.2- CATTGTCAAGCAGAAACACCATTATCTACAAGgtaaatTTtcaggcttTgtcacaactgag  
ERR272293.162385.2- CATTGTCAAGCAGAAACACCATTATCTACAAGgtaaatTTtcaggcttTgtcacaactgag  
ERR272293.163306.2- CATTGTCAAGCAGAAACACCATTATCTACAAGgtaaatTTtcaggcttTgtcacaactgag  
ERR272314.115165.2+ CATTGTCAAGCAGAAACACCATTATCTACAAGgtaaatTTtcaggcttTgtcacaactgag  
ERR272317.118222.2- CATTGTCAAGCAGAAACACCATTATCTACAAGgtaaatTTtcaggcttTgtcacaactgag  
ERR272334.112347.2- CATTGTCAAGCAGAAACACCATTATCTACAAGgtaaatTTtcaggcttTgtcacaactgag  
ERR272354.158567.2- CATTGTCAAGCAGAAACACCATTATCTACAAGgtaaatTTtcaggcttTgtcacaactgag  
ERR272355.315072.2- CATTGTCAAGCAGAAACACCATTATCTACAAGgtaaatTTtcaggcttTgtcacaactgag  
ERR272362.246723.2+ CATTGTCAAGCAGAAACACCATTATCTACAAGgtaaatTTtcaggcttTgtcacaactgag  
ERR272362.295779.2+ CATTGTCAAGCAGAAACACCATTATCTACAAGgtaaatTTtcaggcttTgtcacaactgag  
ERR272369.398363.2+ CATTGTCAAGCAGAAACACCATTATCTACAAGgtaaatTTtcaggcttTgtcacaactgag  
ERR272369.424797.2+ CATTGTCAAGCAGAAACACCATTATCTACAAGgtaaatTTtcaggcttTgtcacaactgag  
ERR272370.311833.2+ CATTGTCAAGCAGAAACACCATTATCTACAAGgtaaatTTtcaggcttTgtcacaactgag  
ERR272379.96933.2+ CATTGTCAAGCAGAAACACCATTATCTACAAGgtaaatTTtcaggcttTgtcacaactgag  
ERR272380.163688.2+ CATTGTCAAGCAGAAACACCATTATCTACAAGgtaaatTTtcaggcttTgtcacaactgag  
ERR272388.192361.4- CATTGTCAAGCAGAAACACCATTATCTACAAGgtaaatTTtcaggcttTgtcacaactgag  
ERR272410.221315.2- CATTGTCAAGCAGAAACACCATTATCTACAAGgtaaatTTtcaggcttTgtcacaactgag  
ERR272416.127715.2+ CATTGTCAAGCAGAAACACCATTATCTACAAGgtaaatTTtcaggcttTgtcacaactgag  
ERR272417.79284.2+ CATTGTCAAGCAGAAACACCATTATCTACAAGgtaaatTTtcaggcttTgtcacaactgag  
ERR272418.23402.2+ CATTGTCAAGCAGAAACACCATTATCTACAAGgtaaatTTtcaggcttTgtcacaactgag  
ERR244147.27177651.1- ATTGGCAAGCACAAACACCATTATCTACAAGgtaaatTTtcaggcttTgtcacaactgag  
ERR244149.14395483.2+ ATTGTCAAGCAGAAACACCATTATCTACAAGgtaaatTTtcaggcttTgtcacaactgag  
ERR244145.7609561.2+ TTGTCAAGCAGAAACACCATTATCTACAAGgtaaatTTtcaggcttTgtcacaactgag  
ERR244156.133816308.1- TTGTCAAGCAGAAACACCATTATCTACAAGgtaaatTTtcaggcttTgtcacaactgag  
ERR244148.7498070.1+ TGTCAGCAGAAACACCATTATCTACAAGgtaaatTTtcaggcttTgtcacaactgag  
ERR244146.90803826.1+ GTCAAGCAGAAACACCATTATCTACAAGgtaaatTTtcaggcttTgtcacaactgag  
ERR244149.60575310.2- GTCAAGCAGAAACACCATTATCTACAAGgtaaatTTtcaggcttTgtcacaactgag  
ERR244154.37716924.1- GTCAAGCAGAAACACCATTATCTACAAGgtaaatTTtcaggcttTgtcacaactgag  
ERR244158.47537176.1- GTCAAGCAGAAACACCATTATCTACAAGgtaaatTTtcaggcttTgtcacaactgag  
ERR244156.102713578.1- TCAAGCAGAAACACCATTATCTACAAGgtaaatTTtcaggcttTgtcacaactgag  
ERR244157.116596890.1+ TCAAGCAGAAACACCATTATCTACAAGgtaaatTTtcaggcttTgtcacaactgag  
ERR244152.17403384.1- CAAGCAGAAACACCATTATCTACAAGgtaaatTTtcaggcttTgtcacaactgag  
ERR244156.130034420.2- CAAGCAGAAACACCATTATCTACAAGgtaaatTTtcaggcttTgtcacaactgag  
ERR244156.54583533.1- AAGCAGAAACACCATTATCTACAAGgtaaatTTtcaggcttTgtcacaactgag  
ERR244147.87008119.2- GCAGAAACACCATTATCTACAAGgtaaatTTtcaggcttTgtcacaactgag  
ERR244145.59032948.1+ AGAAACACCATTATCTACAAGgtaaatTTtcaggcttTgtcacaactgag  
ERR244148.45966745.2+ AGAAACACCATTATCTACAAGgtaaatTTtcaggcttTgtcacaactgag  
ERR244149.24348199.2+ AGAAACACCATTATCTACAAGgtaaatTTtcaggcttTgtcacaactgag  
ERR244149.47523738.2+ AGAAACACCATTATCTACAAGgtaaatTTtcaggcttTgtcacaactgag  
ERR244156.150973147.1+ AGAAACACCATTATCTACAAGgtaaatTTtcaggcttTgtcacaactgag

ERR244157.53670734.1+  
ERR244156.57001811.1+  
ERR244157.28744060.2-  
ERR244157.74836971.2+  
ERR244157.99766491.1+  
ERR244156.143885543.2+  
ERR244148.29532907.2-  
ERR244156.153471681.1+  
ERR244157.105557526.1+  
ERR244156.62598249.1-  
ERR244145.99102567.1-  
ERR244156.68083478.1-  
ERR244147.13481294.1+  
ERR244150.43157459.2-  
ERR244150.50826763.2-  
ERR244148.47100029.1+  
ERR244148.74455538.1-  
ERR244148.80697691.2+  
ERR244151.23757510.1-  
ERR244151.56060598.1-  
ERR244157.103004017.2-  
ERR244157.63718191.2-  
ERR244152.17127458.2+  
ERR244150.43787057.1-  
ERR244156.38707225.1-  
ERR244158.23577951.1+  
ERR244146.56067872.1+  
ERR244147.100501284.1-  
ERR244146.115328676.2+  
ERR244153.13214808.2-  
ERR244153.26823307.1+  
ERR244153.46108787.2-  
ERR244153.53014680.1+  
ERR244153.59606166.1+  
ERR244153.62989800.1+  
ERR244153.90822497.1+  
ERR244158.31623411.2-  
ERR244145.150059830.2-  
ERR244146.103434928.2+  
ERR244156.47741673.2-  
ERR244150.36647122.1+  
ERR244156.93512221.2+  
ERR244158.28053158.2-  
ERR244156.44756902.2+  
ERR244157.22087889.2-  
ERR244157.24672276.2-  
ERR244149.45979634.2+  
ERR244157.81766401.2-  
ERR244158.12039058.2-

AGAAACACCATTATCTACAAGgtaaatttgcaggcttgtcacaactgag  
GAAACACCATTATCTACAAGgtaaatttgcaggcttgtcacaactgag  
GAAACACCATTATCTACAAGgtaaatttgcaggcttgtcacaactgag  
GAAACACCATTATCTACAAGgtaaatttgcaggcttgtcacaactgag  
GAAACACCATTATCTACAAGgtaaatttgcaggcttgtcacaactgag  
AAACACCATTATCTACAAGgtaaatttgcaggcttgtcacaactgag  
AACACCATTATCTACAAGgtaaatttgcaggcttgtcacaactgag  
AACACCATTATCTACAAGgtaaatttgcaggcttgtcacaactgag  
AACACCATTATCTACAAGgtaaatttgcaggcttgtcacaactgag  
ACACCATTATCTACAAGgtaaatttgcaggcttgtcacaactgag  
CACCATTATCTACAAGgtaaatttgcaggcttgtcacaactgag  
CACCATTATCTACAAGgtaaatttgcaggcttgtcacaactgag  
ACCATTATCTACAAGgtaaatttgcaggcttgtcacaactgag  
ACCATTATCTACAAGgtaaatttgcaggcttgtcacaactgag  
ACCATTATCTACAAGgtaaatttgcaggcttgtcacaactgag  
CATTATCTACAAGgtaaatttgcaggcttgtcacaactgag  
CATTATCTACAAGgtaaatttgcaggcttgtcacaactgag  
CATTATCTACAAGgtaaatttgcaggcttgtcacaactgag  
CATTATCTACAAGgtaaatttgcaggcttgtcacaactgag  
CATTATCTACAAGgtaaatttgcaggcttgtcacaactgag  
CATTATCTACAAGgtaaatttgcaggcttgtcacaactgag  
ATTATCTACAAGgtaaatttgcaggcttgtcacaactgag  
TTATCTACAAGgtaaatttgcaggcttgtcacaactgag  
TATCTACAAGgtaaatttgcaggcttgtcacaactgag  
TATCTACAAGgtaaatttgcaggcttgtcacaactgag  
ATCTACAAGgtaaatttgcaggcttgtcacaactgag  
ATCTACAAGgtaaatttgcaggcttgtcacaactgag  
CTACAAGgtaaatttgcaggcttgtcacaactgag  
CTACAAGgtaaatttgcaggcttgtcacaactgag  
CTACAAGgtaaatttgcaggcttgtcacaactgag  
CTACAAGgtaaatttgcaggcttgtcacaactgag  
CTACAAGgtaaatttgcaggcttgtcacaactgag  
CTACAAGgtaaatttgcaggcttgtcacaactgag  
CTACAAGgtaaatttgcaggcttgtcacaactgag  
CTACAAGgtaaatttgcaggcttgtcacaactgag  
CTACAAGgtaaatttgcaggcttgtcacaactgag  
TACACGgtaaatttgcaggcttgtcacaactgag  
TACAAGgtaaatttgcaggcttgtcacaactgag  
TACAAGgtaaatttgcaggcttgtcacaactgag  
ACAAGgtaaatttgcaggcttgtcacaactgag  
ACAAGgtaaatttgcaggcttgtcacaactgag  
CAAGgtaaatttgcaggcttgtcacaactgag  
AAGgtaaatttgcaggcttgtcacaactgag  
AAGgtaaatttgcaggcttgtcacaactgag  
AAGgtaaatttgcaggcttgtcacaactgag  
AAGgtaaatttgcaggcttgtcacaactgag  
AGgtaaatttgcaggcttgtcacaactgag  
AGgtaaatttgcaggcttgtcacaactgag  
AGgtaaatttgcaggcttgtcacaactgag

consensus

CATTGTCAAGCAGAAACACCATTATCTACAAGgtaaatttgcaggcttgtcacaactgag

# M. Saker falcon (No. 15), exon 4, WGS data

- CAP3 alignment of WGS data spanning exon 4 (uppercase letters)

```

      .   :   .   :   .   :   .   :   .   :
SRR516271.42383091.2+  tgtgtctttctttccagTTTG
SRR516271.54300452.2+  tgtgtctttctttccagTTTG
SRR516271.59598790.2+  tgtgtctttctttccagTTTG
SRR516269.72607350.2+  tgtgtctttctttccagTTTGCTGTT
SRR516273.51714565.2+  tgtgtctttctttccagTTTGCTGTTCC
SRR516271.51353961.1-  tgtgtctttctttccagTTTGCTGTTCCAGTTAA
SRR516271.66205064.1-  tgtgtctttctttccagTTTGCTGTTCCAGTTAA
SRR516272.54263740.1-  tgtgtctttctttccagTTTGCTGTTCCAGTTAAGAAACCAAGTAT
SRR516276.64208609.1+  tgtgtctttctttccagTTTGCTGTTCCAGTTAAGAAACCAAGTATGCT
SRR516278.25692502.1-  tgtgtctttctttccagTTTGCTGTTCCAGTTAAGAAACCAAGTATGCTTGT
SRR516279.48286067.1-  tgtgtctttctttccagTTTGCTGTTCCAGTTAAGAAACCAAGTATGCTTGT
SRR516278.43431721.2-  tgtgtctttctttccagTTTGCTGTTCCAGTTAAGAAACCAAGTATGCTTGTA
SRR516280.64868542.1+  tgtgtctttctttccagTTTGCTGTTCCAGTTAAGAAACCAAGTATGCTTGTA
SRR516278.21204016.2+  tgtgtctttctttccagTTTGCTGTTCCAGTTAAGAAACCAAGTATGCTTGTACTT
SRR516275.49486814.2-  tgtgtctttctttccagTTTGCTGTTCCAGTTAAGAAACCAAGTATGCTTGTACTTT
SRR516276.60818054.2-  tgtgtctttctttccagTTTGCTGTTCCAGTTAAGAAACCAAGTATGCTTGTACTTTT
SRR516275.33120199.2+  tgtgtctttctttccagTTTGCTGTTCCCGTTAAGAAACCAAGTATGCTTGTACTTTTA
SRR516275.71143232.1+  tgtgtctttctttccagTTTGCTGTTCCAGTTAAGAAACCAAGTATGCTTGTACTTTTA
SRR516276.20232587.1-  tgtgtctttctttccagTTTGCTGTTCCAGTTAAGAAACCAAGTATGCTTGTACTTTTA
SRR516276.20690846.1+  tgtgtctttctttccagTTTGCTGTTCCAGTTAAGAAACCAAGTATGCTTGTACTTTTA
SRR516276.6403489.2-  tgtgtctttctttccagTTTGCTGTTCCAGTTAAGAAACCAAGTATGCTTGTACTTTTA
SRR516276.66981451.2-  tgtgtctttctttccagTTTGCTGTTCCAGTTAAGAAACCAAGTATGCTTGTACTTTTA
SRR516277.32099413.1-  tgtgtctttctttccagTTTGCTGTTCCAGTTAAGAAACCAAGTATGCTTGTACTTTTA
SRR516277.38484509.1-  tgtgtctttctttccagTTTGCTGTTCCAGTTAAGAAACCAAGTATGCTTGTACTTTTA
SRR516277.83350259.2+  tgtgtctttctttccagTTTGCTGTTCCAGTTAAGAAACCAAGTATGCTTGTACTTTTA
SRR516278.25790579.2-  tgtgtctttctttccagTTTGCTGTTCCAGTTAAGAAACCAAGTATGCTTGTACTTTTA
SRR516279.53275687.2-  tgtgtctttctttccagTTTGCTGTTCCAGTTAAGAAACCAAGTATGCTTGTACTTTTA
SRR516279.63728261.2-  tgtgtctttctttccagTTTGCTGTTCCAGTTAAGAAACCAAGTATGCTTGTACTTTTA
SRR516279.66465760.1-  tgtgtctttctttccagTTTGCTGTTCCAGTTAAGAAACCAAGTATGCTTGTACTTTTA
SRR516279.78970894.1-  tgtgtctttctttccagTTTGCTGTTCCAGTTAAGAAACCAAGTATGCTTGTACTTTTA
SRR516280.24131918.2-  tgtgtctttctttccagTTTGCTGTTCCAGTTAAGAAACCAAGTATGCTTGTACTTTTA
SRR516280.24137326.2+  tgtgtctttctttccagTTTGCTGTTCCAGTTAAGAAACCAAGTATGCTTGTACTTTTA
SRR516280.64560903.1+  tgtgtctttctttccagTTTGCTGTTCCAGTTAAGAAACCAAGTATGCTTGTACTTTTA
SRR516272.31926998.1+  gtctttctttccagTTTGCTGTTCCAGTTAAGAAACCAAGTATGCTTGT
SRR516271.56413808.2-  tctttctttccagTTTGCTGTTCCAGTTAAGAAACCAAGTATGCTTGT
SRR516271.17809087.2+  ctttctttccagTTTGCTGTTCCAGTTAAGAAACCAAGTATGCTTGTA
SRR516271.62803696.2+  ctttctttccagTTTGCTGTTCCAGTTAAGAAACCAAGTATGCTTGTA
SRR516271.62803699.2+  ctttctttccagTTTGCTGTTCCAGTTAAGAAACCAAGTATGCTTGTA
SRR516275.58094264.2+  ttctttccagTTTGCTGTTCCAGTTAAGAAACCAAGTATGCTTGTACTTTTA
SRR516279.38161935.1+  ttctttccagTTTGCTGTTCCAGTTAAGAAACCAAGTATGCTTGTACTTTTA
SRR516279.63770083.1-  ttctttccagTTTGCTGTTCCAGTTAAGAAACCAAGTATGCTTGTACTTTTA
SRR516280.45814438.1-  ttctttccagTTTGCTGTTCCAGTTAAGAAACCAAGTATGCTTGTACTTTTA
SRR516276.23832642.1+  cttttccagTTTGCTGTTCCAGTTAAGAAACCAAGTATGCTTGTACTTTTA
SRR516278.12489663.2+  cttttccagTTTGCTGTTCCAGTTAAGAAACCAAGTATGCTTGTACTTTTA
SRR516278.57787935.1-  gTTTGCTGTTCCAGTTAAGAAACCAAGTATGCTTGTACTTTTA
SRR516279.17476392.1-  gTTTGCTGTTCCAGTTAAGAAACCAAGTATGCTTGTACTTTTA
SRR516279.11087506.1+  TTGCTGTTCCAGTTAAGAAACCAAGTATGCTTGTACTTTTA
SRR516277.60425397.2-  TGCTGTTCCAGTTAAGAAACCAAGTATGCTTGTACTTTTA
SRR516279.39710289.1+  GTTCCAGTTAAGAAACCAAGTATGCTTGTACTTTTA
SRR516270.12142505.2+  TCCAGTTAAGAAACCAAGTATGCTTGTACTTTTA
SRR516270.39832789.1+  TCCAGTTAAGAAACCAAGTATGCTTGTACTTTTA
SRR516275.53203846.1+  TCCAGTTAAGAAACCAAGTATGGTGTACTTTTA
SRR516275.5527572.1+  TCCAGTTAAGAAACCAAGTATGCTTGTACTTTTA
SRR516282.17515890.1+  CCAGTTAAGAAACCGAGTATGCTTGTACTTTTA
SRR516274.109686541.2+  TAAGAAACCAAGTATGCTTGTACTTTTA
SRR516272.10742188.1-  AGTATGCTTGTACTTTTA
SRR516270.80465942.1-  TACTTTTA
SRR516274.18696867.2+  TA
SRR516279.37218141.2+  TA

```

consensus

tgtgtctttctttccagTTTGCTGTTCCAGTTAAGAAACCAAGTATGCTTGTACTTTTA

```

SRR516278.25790579.2-  TCC
SRR516276.20232587.1-  TCCC
SRR516280.24131918.2-  TCCCCTG
SRR516277.32099413.1-  TCCCCTGC
SRR516280.64560903.1+  TCCCCTGC
SRR516270.12142505.2+  TCCCCTGCCATGG
SRR516270.39832789.1+  TCCCCTGCCATGG
SRR516276.20690846.1+  TCCCCTGCCATGGCC
SRR516274.109686541.2+  TCCCCTGCCATGGCCAAGC
SRR516279.63728261.2-  TCCCCTGCCATGGCCAAGCA
SRR516279.78970894.1-  TCCCCTGCCATGGCCAAGCA
SRR516275.71143232.1+  TCCCCTGCCATGGCCAAGCAGAAA

```



SRR516276.66981451.2- TCCCCCTGCCCATGGCCAAGCAGAAA  
SRR516277.38484509.1- TCCCCCTGCCCATGGCCAAGCAGAAA  
SRR516280.24137326.2+ TCCCCCTGCCCATGGCCAAGCAGAAACACC  
SRR516272.10742188.1- TCCCCCTGCCCATGGCCAAGCAGAAACACCA  
SRR516277.83350259.2+ TCCCCCTGCCCATGGCCAAGCAGAAACACCA  
SRR516279.66465760.1- TCCCCCTGCCCATGGCCAAGCAGAAACACCATGTCT  
SRR516275.33120199.2+ TCCCCCTGCCCATGGCCAAGCAGAAACCCCATGTCTAC  
SRR516279.53275687.2- TCCCCCTGCCCATGGCCAAGCAGAAACACCATGTCTAC  
SRR516276.6403489.2- TCCCCCTGCCCATGGCCAAGCAGAAACACCATGTCTACA  
SRR516270.80465942.1- TCCCCCTGCCCATGGCCAAGCAGAAACACCATGTCTACAAG  
SRR516274.18696867.2+ TCCCCCTGCCCATGGCCAAGCAGAAACACCATGTCTACAAGgtaaaa  
SRR516275.58094264.2+ TCCCCCTGCCCATGGCCAAGCAGAAACACCATGTCTACAAGgtaaaa  
SRR516279.38161935.1+ TCCCCCTGCCCATGGCCAAGCAGAAACACCATGTCTACAAGgtaaaa  
SRR516279.63770083.1- TCCCCCTGCCCATGGCCAAGCAGAAACACCATGTCTACAAGgtaaaa  
SRR516280.45814438.1- TCCCCCTGCCCATGGCCAAGCAGAAACACCATGTCTACAAGgtaaaa  
SRR516276.23832642.1+ TCCCCCTGCCCATGGCCAAGCAGAAACACCATGTCTACAAGgtaaaaatt  
SRR516278.12489663.2+ TCCCCCTGCCCATGGCCAAGCAGAAACACCATGTCTACAAGgtaaaaatt  
SRR516278.57787935.1- TCCCCCTGCCCATGGCCAAGCAGAAACACCATGTCTACAAGgtaaaaattgcaggctg  
SRR516279.17476392.1- TCCCCCTGCCCATGGCCAAGCAGAAACACCATGTCTACAAGgtaaaaattgcaggctg  
SRR516279.11087506.1+ TCCCCCTGCCCATGGCCAAGCAGAAACACCATGTCTACAAGgtaaaaattgcaggctgct  
SRR516275.53203846.1+ TCCCCCTGCCCATGGCCAAGCAGAAACGCATGTCTACAAGgtaaaaattgcaggctgtct  
SRR516275.5527572.1+ TCCCCCTGCCCATGGCCAAGCAGAAACACCATGTCTACAAGgtaaaaattgcaggctgtct  
SRR516277.60425397.2- TCCCCCTGCCCATGGCCAAGCAGAAACACCATGTCTACAAGgtaaaaattgcaggctgtct  
SRR516279.37218141.2+ TCCCCCTGCCCATGGCCAAGCAGAAACACCATGTCTACAAGgtaaaaattgcaggctgtct  
SRR516279.39710289.1+ TCCCCCTGCCCATGGCCAAGCAGAAACACCATGTCTACAAGgtaaaaattgcaggctgtct  
SRR516282.17515890.1+ TCCCCCTGCCCATGGCCAAGCAGAAACACCATGTCTACAAGgtaaaaattgcaggctgtct

consensus

TCCCCCTGCCCATGGCCAAGCAGAAACACCATGTCTACAAGgtaaaaattgcaggctgtct

---

# N. Peregrine falcon (No. 15), exon 4, WGS data

- CAP3 alignment of WGS data spanning exon 4 (uppercase letters)

```
      .   :   .   :   .   :   .   :   .   :   .   :
SRR516255.67101666.1+   gtctttctttccagTTT
SRR516257.9097618.1-   gtctttctttccagTTT
SRR516258.28041248.2-   gtctttctttccagTTT
SRR516262.3518177.1-   gtctttctttccagTTT
SRR516262.3518202.1-   gtctttctttccagTTT
SRR516253.8124406.2+   gtctttctttccagTTTGC
SRR516254.4490370.1+   gtctttctttccagTTTGCT
SRR516255.65242061.1-   gtctttctttccagTTTGCT
SRR516255.79208835.1+   gtctttctttccagTTTGCTG
SRR516262.4923955.2-   gtctttctttccagTTTGCTG
SRR516262.4923959.2-   gtctttctttccagTTTGCTG
SRR516253.68324806.1-   gtctttctttccagTTTGCTGTT
SRR516259.58094187.1-   gtctttctttccagTTTGCTGTT
SRR516259.77523733.1-   gtctttctttccagTTTGCTGTT
SRR516267.46992421.2-   gtctttctttccagTTTGCTGTT
SRR516255.39372922.2-   gtctttctttccagTTTGCTGTTCC
SRR516255.68420886.2+   gtctttctttccagTTTGCTGTTCC
SRR516264.28556706.2-   gtctttctttccagTTTGCTGTTCC
SRR516264.30488692.2-   gtctttctttccagTTTGCTGTTCC
SRR516264.61584647.2-   gtctttctttccagTTTGCTGTTCC
SRR516268.66108476.1-   gtctttctttccagTTTGCTGTTCC
SRR516253.69206126.1-   gtctttctttccagTTTGCTGTTCCA
SRR516253.80177734.1-   gtctttctttccagTTTGCTGTTCCA
SRR516257.59601121.2+   gtctttctttccagTTTGCTGTTCCA
SRR516262.39538147.2-   gtctttctttccagTTTGCTGTTCCA
SRR516262.39538148.2-   gtctttctttccagTTTGCTGTTCCA
SRR516255.69835771.2+   gtctttctttccagTTTGCTGTTCCAG
SRR516263.21456844.2-   gtctttctttccagTTTGCTGTTCCAGT
SRR516263.21456847.2-   gtctttctttccagTTTGCTGTTCCAGT
SRR516253.8547748.1-   gtctttctttccagTTTGCTGTTCCAGTTA
SRR516256.18788178.2-   gtctttctttccagTTTGCTGTTCCAGTTA
SRR516256.18788182.2-   gtctttctttccagTTTGCTGTTCCAGTTA
SRR516256.21930298.1-   gtctttctttccagTTTGCTGTTCCAGTTA
SRR516258.19489566.2-   gtctttctttccagTTTGCTGTTCCAGTTAA
SRR516266.43829109.2-   gtctttctttccagTTTGCTGTTCCAGTTAA
SRR516254.78958164.2-   gtctttctttccagTTTGCTGTTCCAGTTAAGAA
SRR516264.2441810.2-   gtctttctttccagTTTGCTGTTCCAGTTAAGAAA
SRR516264.68144895.2-   gtctttctttccagTTTGCTGTTCCAGTTAAGAAA
SRR516267.40266999.2+   gtctttctttccagTTTGCTGTTCCAGTTAAGAAA
SRR516253.17244217.2+   gtctttctttccagTTTGCTGTTCCAGTTAAGAAAACC
SRR516257.75910207.1-   gtctttctttccagTTTGCTGTTCCAGTTAAGAAAACC
SRR516263.56739339.2+   gtctttctttccagTTTGCTGTTCCAGTTAAGAAAACC
SRR516264.73888500.1-   gtctttctttccagTTTGCTGTTCCAGTTAAGAAAACCA
SRR516264.75833814.1-   gtctttctttccagTTTGCTGTTCCAGTTAAGAAAACCA
SRR516254.48908071.1-   gtctttctttccagTTTGCTGTTCCAGTTAAGAAAACCAAG
SRR516266.35283310.2+   gtctttctttccagTTTGCTGTTCCAGTTAAGAAAACCAAG
SRR516254.223018.1-   gtctttctttccagTTTGCTGTTCCAGTTAAGAAAACCAAGT
SRR516260.16848947.2+   gtctttctttccagTTTGCTGTTCCAGTTAAGAAAACCAAGT
SRR516260.36101835.2+   gtctttctttccagTTTGCTGTTCCAGTTAAGAAAACCAAGT
SRR516260.46009159.1+   gtctttctttccagTTTGCTGTTCCAGTTAAGAAAACCAAGT
SRR516260.64033010.2+   gtctttctttccagTTTGCTGTTCCAGTTAAGAAAACCAAGT
SRR516266.32033793.1+   gtctttctttccagTTTGCTGTTCCAGTTAAGAAAACCAAGT
SRR516253.51133180.1-   gtctttctttccagTTTGCTGTTCCAGTTAAGAAAACCAAGTA
SRR516254.41602867.1+   gtctttctttccagTTTGCTGTTCCAGTTAAGAAAACCAAGTAT
SRR516258.68260524.1-   gtctttctttccagTTTGCTGTTCCAGTTAAGAAAACCAAGTAT
SRR516266.46821086.1-   gtctttctttccagTTTGCTGTTCCAGTTAAGAAAACCAAGTAT
SRR516254.16919233.2-   gtctttctttccagTTTGCTGTTCCAGTTAAGAAAACCAAGTATG
SRR516254.89325311.2-   gtctttctttccagTTTGCTGTTCCAGTTAAGAAAACCAAGTATG
SRR516255.19693586.2-   gtctttctttccagTTTGCTGTTCCAGTTAAGAAAACCAAGTATG
SRR516261.47610756.2+   gtctttctttccagTTTGCTGTTCCAGTTAAGAAAACCAAGTATG
SRR516268.51432009.1-   gtctttctttccagTTTGCTGTTCCAGTTAAGAAAACCAAGTATG
SRR516255.81054542.2+   gtctttctttccagTTTGCTGTTCCAGTTAAGAAAACCAAGTATGCTTGT
SRR516256.6485514.2+   gtctttctttccagTTTGCTGTTCCAGTTAAGAAAACCAAGTATGCTTGT
SRR516254.4135028.1-   gtctttctttccagTTTGCTGTTCCAGTTAAGAAAACCAAGTATGCTTGTGTA
SRR516263.4401630.1+   gtctttctttccagTTTGCTGTTCCAGTTAAGAAAACCAAGTATGCTTGTGTA
SRR516257.52841837.1+   gtctttctttccagTTTGCTGTTCCAGTTAAGAAAACCAAGTATGCTTGTGTA
SRR516257.80856403.2-   gtctttctttccagTTTGCTGTTCCAGTTAAGAAAACCAAGTATGCTTGTGTA
SRR516253.49535897.2-   gtctttctttccagTTTGCTGTTCCAGTTAAGAAAACCAAGTATGCTTGTGTA
SRR516255.28436949.2-   gtctttctttccagTTTGCTGTTCCAGTTAAGAAAACCAAGTATGCTTGTGTA
SRR516254.59112408.1+   gtctttctttccagTTTGCTGTTCCAGTTAAGAAAACCAAGTATGCTTGTGTA
SRR516262.26241561.2-   gtctttctttccagTTTGCTGTTCCAGTTAAGAAAACCAAGTATGCTTGTGTA
SRR516263.41020644.1-   gtctttctttccagTTTGCTGTTCCAGTTAAGAAAACCAAGTATGCTTGTGTA
SRR516255.64448961.1+   gtctttctttccagTTTGCTGTTCCAGTTAAGAAAACCAAGTATGCTTGTGTA
SRR516255.31773466.1+   gtctttctttccagTTTGCTGTTCCAGTTAAGAAAACCAAGTATGCTTGTGTA
SRR516253.365320.2+   gtctttctttccagTTTGCTGTTCCAGTTAAGAAAACCAAGTATGCTTGTGTA
```

SRR516253.5211449.1+ gtctttctttccagTTTGTGTTCCAGTTAAGAAACCAAGTATGCTTGTACTTTTATCC  
SRR516253.64655527.1+ gtctttctttccagTTTGTGTTCCAGTTAAGAAACCAAGTATGCTTGTACTTTTATCC  
SRR516253.67066187.2+ gtctttctttccagTTTGTGTTCCAGTTAAGAAACCAAGTATGCTTGTACTTTTATCC  
SRR516253.80551265.2+ gtctttctttccagTTTGTGTTCCAGTTAAGAAACCAAGTATGCTTGTACTTTTATCC  
SRR516254.10680655.2- gtctttctttccagTTTGTGTTCCAGTTAAGAAACCAAGTATGCTTGTACTTTTATCC  
SRR516254.56196602.1+ gtctttctttccagTTTGTGTTCCAGTTAAGAAACCAAGTATGCTTGTACTTTTATCC  
SRR516254.56749609.1- gtctttctttccagTTTGTGTTCCAGTTAAGAAACCAAGTATGCTTGTACTTTTATCC  
SRR516254.62410953.2+ gtctttctttccagTTTGTGTTCCAGTTAAGAAACCAAGTATGCTTGTACTTTTATCC  
SRR516254.79124957.2+ gtctttctttccagTTTGTGTTCCAGTTAAGAAACCAAGTATGCTTGTACTTTTATCC  
SRR516254.86674766.2+ gtctttctttccagTTTGTGTTCCAGTTAAGAAACCAAGTATGCTTGTACTTTTATCC  
SRR516255.12845150.2- gtctttctttccagTTTGTGTTCCAGTTAAGAAACCAAGTATGCTTGTACTTTTATCC  
SRR516255.1697326.1+ gtctttctttccagTTTGTGTTCCAGTTAAGAAACCAAGTATGCTTGTACTTTTATCC  
SRR516255.48156284.2+ gtctttctttccagTTTGTGTTCCAGTTAAGAAACCAAGTATGCTTGTACTTTTATCC  
SRR516255.65504789.1- gtctttctttccagTTTGTGTTCCAGTTAAGAAACCAAGTATGCTTGTACTTTTATCC  
SRR516255.67101666.2- gtctttctttccagTTTGTGTTCCAGTTAAGAAACCAAGTATGCTTGTACTTTTATCC  
SRR516255.70481761.2+ gtctttctttccagTTTGTGTTCCAGTTAAGAAACCAAGTATGCTTGTACTTTTATCC  
SRR516255.70485066.1+ gtctttctttccagTTTGTGTTCCAGTTAAGAAACCAAGTATGCTTGTACTTTTATCC  
SRR516256.1347814.2- gtctttctttccagTTTGTGTTCCAGTTAAGAAACCAAGTATGCTTGTACTTTTATCC  
SRR516256.18761086.1- gtctttctttccagTTTGTGTTCCAGTTAAGAAACCAAGTATGCTTGTACTTTTATCC  
SRR516256.5907042.1+ gtctttctttccagTTTGTGTTCCAGTTAAGAAACCAAGTATGCTTGTACTTTTATCC  
SRR516257.26973823.1+ gtctttctttccagTTTGTGTTCCAGTTAAGAAACCAAGTATGCTTGTACTTTTATCC  
SRR516257.66685789.1+ gtctttctttccagTTTGTGTTCCAGTTAAGAAACCAAGTATGCTTGTACTTTTATCC  
SRR516257.7312118.2+ gtctttctttccagTTTGTGTTCCAGTTAAGAAACCAAGTATGCTTGTACTTTTATCC  
SRR516258.24981535.2+ gtctttctttccagTTTGTGTTCCAGTTAAGAAACCAAGTATGCTTGTACTTTTATCC  
SRR516258.25211817.1+ gtctttctttccagTTTGTGTTCCAGTTAAGAAACCAAGTATGCTTGTACTTTTATCC  
SRR516258.38515055.2+ gtctttctttccagTTTGTGTTCCAGTTAAGAAACCAAGTATGCTTGTACTTTTATCC  
SRR516258.45585051.1+ gtctttctttccagTTTGTGTTCCAGTTAAGAAACCAAGTATGCTTGTACTTTTATCC  
SRR516258.54363655.1- gtctttctttccagTTTGTGTTCCAGTTAAGAAACCAAGTATGCTTGTACTTTTATCC  
SRR516258.67589391.2+ gtctttctttccagTTTGTGTTCCAGTTAAGAAACCAAGTATGCTTGTACTTTTATCC  
SRR516261.14549337.2+ gtctttctttccagTTTGTGTTCCAGTTAAGAAACCAAGTATGCTTGTACTTTTATCC  
SRR516262.12338739.2+ gtctttctttccagTTTGTGTTCCAGTTAAGAAACCAAGTATGCTTGTACTTTTATCC  
SRR516262.12338742.2+ gtctttctttccagTTTGTGTTCCAGTTAAGAAACCAAGTATGCTTGTACTTTTATCC  
SRR516263.16241967.2+ gtctttctttccagTTTGTGTTCCAGTTAAGAAACCAAGTATGCTTGTACTTTTATCC  
SRR516263.17118136.1- gtctttctttccagTTTGTGTTCCAGTTAAGAAACCAAGTATGCTTGTACTTTTATCC  
SRR516263.49448203.2- gtctttctttccagTTTGTGTTCCAGTTAAGAAACCAAGTATGCTTGTACTTTTATCC  
SRR516263.6095508.2- gtctttctttccagTTTGTGTTCCAGTTAAGAAACCAAGTATGCTTGTACTTTTATCC  
SRR516263.65854490.1- gtctttctttccagTTTGTGTTCCAGTTAAGAAACCAAGTATGCTTGTACTTTTATCC  
SRR516263.75018518.2+ gtctttctttccagTTTGTGTTCCAGTTAAGAAACCAAGTATGCTTGTACTTTTATCC  
SRR516263.76557724.1+ gtctttc-tttccagTTTGTGTTCCAGTTAAGAAACCAAGTATGCTTGTACTTTTATCC  
SRR516263.76557725.1+ gtctttc-tttccagTTTGTGTTCCAGTTAAGAAACCAAGTATGCTTGTACTTTTATCC  
SRR516253.8124406.1- ctttctttccagTTTGTGTTCCAGTTAAGAAACCAAGTATGCTTGTACTTTTATCC  
SRR516254.4490370.2- ctttctttccagTTTGTGTTCCAGTTAAGAAACCAAGTATGCTTGTACTTTTATCC  
SRR516255.69835771.1- ctttctttccagTTTGTGTTCCAGTTAAGAAACCAAGTATGCTTGTACTTTTATCC  
SRR516257.27584421.1+ tttctttccagTTTGTGTTCCAGTTAAGAAACCAAGTATGCTTGTACTTTTATCC  
SRR516254.18031680.2+ tttctttccagTTTGTGTTCCAGTTAAGAAACCAAGTATGCTTGTACTTTTATCC  
SRR516255.68420886.1- tttctttccagTTTGTGTTCCAGTTAAGAAACCAAGTATGCTTGTACTTTTATCC  
SRR516261.82860556.1+ tttctttccagTTTGTGTTCCAGTTAAGAAACCAAGTATGCTTGTACTTTTATCC  
SRR516255.79208835.2- tttctttccagTTTGTGTTCCAGTTAAGAAACCAAGTATGCTTGTACTTTTATCC  
SRR516268.44090166.1+ cttttccagTTTGTGTTCCAGTTAAGAAACCAAGTATGCTTGTACTTTT  
SRR516253.84549442.2+ ttttccagTTTGTGTTCCAGTTAAGAAACCAAGTATGCTTGTACTTTTATCC  
SRR516256.24075489.2+ ttttccagTTTGTGTTCCAGTTAAGAAACCAAGTATGCTTGTACTTTTATCC  
SRR516262.21781133.1+ cagTTTGTGTTCCAGTTAAGAAACCAAGTATGCTTGTACTTTTATCC  
SRR516255.31500806.1+ agTTTGTGTTCCAGTTAAGAAACCAAGTATGCTTGTACTTTTATCC  
SRR516268.9704517.1+ gTTTGTGTTCCAGTTAAGAAACCAAGTATGCTTGTACTTTTATCC  
SRR516254.34872139.1+ TTTGTGTTCCAGTTAAGAAACCAAGTATGCTTGTACTTTTATCC  
SRR516255.25565504.2+ TTGCTGTTCCAGTTAAGAAACCAAGTATGCTTGTACTTTTATCC  
SRR516259.72895312.2+ TGCTGTTCCAGTTAAGAAACCAAGTATGCTTGTACTTTTATCC  
SRR516259.8678999.2+ TGCTGTTCCAGTTAAGAAACCAAGTATGCTTGTACTTTTATCC  
SRR516267.7046461.2+ TGCTGTTCCAGTTAAGAAACCAAGTATGCTTGTACTTTTATCC  
SRR516267.7046465.2+ TGCTGTTCCAGTTAAGAAACCAAGTATGCTTGTACTTTTATCC  
SRR516267.9720099.1+ TGCTGTTCCAGTTAAGAAACCAAGTATGCTTGTACTTTTATCC  
SRR516267.9720105.1+ TGCTGTTCCAGTTAAGAAACCAAGTATGCTTGTACTTTTATCC  
SRR516256.10718488.1- GCTGTTCCAGTTAAGAAACCAAGTATGCTTGTACTTTTATCC  
SRR516258.18487741.1- GCTGTTCCAGTTAAGAAACCAAGTATGCTTGTACTTTTATCC  
SRR516255.3305445.1+ CTGTTCCAGTTAAGAAACCAAGTATGCTTGTACTTTTATCC  
SRR516258.75491064.2- CTGTTCCAGTTAAGAAACCAAGTATGCTTGTACTTTTATCC  
SRR516258.75491067.2- CTGTTCCAGTTAAGAAACCAAGTATGCTTGTACTTTTATCC  
SRR516267.15315750.2- CTGTTCCAGTTAAGAAACCAAGTATGCTTGTACTTTTATCC  
SRR516254.59112408.2- GTTCCAGTTAAGAAACCAAGTATGCTTGTACTTTTATCC  
SRR516267.64842649.1+ GTTCCAGTTAAGAAACCAAGTATGCTTGTACTTTTATCC  
SRR516268.30284567.2- CCAGTTAAGAAACCAAGTATGCTTGTACTTTTATCC  
SRR516268.40554607.2+ CCAGTTAAGAAACCAAGTATGCTTGTACTTTTATCC  
SRR516268.40554611.2+ CCAGTTAAGAAACCAAGTATGCTTGTACTTTTATCC  
SRR516254.41602867.2+ CAGTTAAGAAACCAAGTATGCTTGTACTTTTATCC  
SRR516260.26188594.1+ CAGTTAAGAAACCAAGTATGCTTGTACTTTTATCC  
SRR516266.14130943.1- AGTTAAGAAACCAAGTATGCTTGTACTTTTATCC  
SRR516267.60638311.1+ AGTTAAGAAACCAAGTATGCTTGTACTTTTATCC  
SRR516253.19465821.1+ GTTAAAGAAACCAAGTATGCTTGTACTTTTATCC  
SRR516254.54211738.2+ TAAGAAACCAAGTATGCTTGTACTTTTATCC  
SRR516256.18160700.1+ TAAGAAACCAAGTATGCTTGTACTTTTATCC  
SRR516255.31773466.2- AGAAACCAAGTATGCTTGTACTTTTATCC  
SRR516255.64448961.2- AGAAACCAAGTATGCTTGTACTTTTATCC  
SRR516259.18755021.1- AGAAACCAAGTATGCTTGTACTTTTATCC  
SRR516253.72746215.2+ GAAACCAAGTATGCTTGTACTTTTATCC



SRR516267.60638311.1+ CCCTGCCCATGGCCA  
SRR516263.76557724.1+ CCCTGCCCATGGCCAA  
SRR516263.76557725.1+ CCCTGCCCATGGCCAA  
SRR516256.1347814.2- CCCTGCCCATGGCCAAG  
SRR516263.49448208.2- CCCTGCCCATGGCCAAG  
SRR516261.14549337.2+ CCCTGCCCATGGCCAAGC  
SRR516255.67101666.2- CCCTGCCCATGGCCAAGCAG  
SRR516259.18755021.1- CCCTGCCCATGGCCAAGCAG  
SRR516253.67066187.2+ CCCTGCCCATGGCCAAGCAGAAA  
SRR516264.19787823.2+ CCCTGCCCATGGCCAAGCAGAAA  
SRR516264.32999117.2+ CCCTGCCCATGGCCAAGCAGAAA  
SRR516264.47987043.2+ CCCTGCCCATGGCCAAGCAGAAA  
SRR516264.53208831.2+ CCCTGCCCATGGCCAAGCAGAAA  
SRR516264.76289025.2+ CCCTGCCCATGGCCAAGCAGAAA  
SRR516266.189811.1+ CCCTGCCCATGGCCAAGCAGAAA  
SRR516266.32039919.1+ CCCTGCCCATGGCCAAGCAGAAA  
SRR516259.25233688.1- CCCTGCCCATGGCCAAGCAGAAA  
SRR516253.5211449.1+ CCCTGCCCATGGCCAAGCAGAAA  
SRR516267.6877951.1- CCCTGCCCATGGCCAAGCAGAAA  
SRR516264.11312838.1+ CCCTGCCCATGGCCAAGCAGAAA  
SRR516258.54363655.1- CCCTGCCCATGGCCAAGCAGAAA  
SRR516263.65854490.1- CCCTGCCCATGGCCAAGCAGAAA  
SRR516257.66685789.1+ CCCTGCCCATGGCCAAGCAGAAA  
SRR516258.25211817.1+ CCCTGCCCATGGCCAAGCAGAAA  
SRR516267.33129504.1+ CCCTGCCCATGGCCAAGCAGAAA  
SRR516255.70485066.1+ CCCTGCCCATGGCCAAGCAGAAA  
SRR516258.67589391.2+ CCCTGCCCATGGCCAAGCAGAAA  
SRR516263.16241967.2+ CCCTGCCCATGGCCAAGCAGAAA  
SRR516263.6095503.2- CCCTGCCCATGGCCAAGCAGAAA  
SRR516255.1697326.1+ CCCTGCCCATGGCCAAGCAGAAA  
SRR516263.75018518.2- CCCTGCCCATGGCCAAGCAGAAA  
SRR516267.26400091.2- CCCTGCCCATGGCCAAGCAGAAA  
SRR516254.62410953.2+ CCCTGCCCATGGCCAAGCAGAAA  
SRR516254.79124957.2+ CCCTGCCCATGGCCAAGCAGAAA  
SRR516254.10680655.2- CCCTGCCCATGGCCAAGCAGAAA  
SRR516256.5907042.1+ CCCTGCCCATGGCCAAGCAGAAA  
SRR516255.48156284.2+ CCCTGCCCATGGCCAAGCAGAAA  
SRR516255.70481761.2+ CCCTGCCCATGGCCAAGCAGAAA  
SRR516260.4640154.1+ CCCTGCCCATGGCCAAGCAGAAA  
SRR516253.8124406.1- CCCTGCCCATGGCCAAGCAGAAA  
SRR516254.4490370.2- CCCTGCCCATGGCCAAGCAGAAA  
SRR516255.69835771.1- CCCTGCCCATGGCCAAGCAGAAA  
SRR516257.27584421.1+ CCCTGCCCATGGCCAAGCAGAAA  
SRR516254.18031680.2+ CCCTGCCCATGGCCAAGCAGAAA  
SRR516255.68420886.1- CCCTGCCCATGGCCAAGCAGAAA  
SRR516261.82860556.1+ CCCTGCCCATGGCCAAGCAGAAA  
SRR516255.79208835.2- CCCTGCCCATGGCCAAGCAGAAA  
SRR516264.31833336.1+ CCCTGCCCATGGCCAAGCAGAAA  
SRR516264.45706920.1+ CCCTGCCCATGGCCAAGCAGAAA  
SRR516264.45706923.1+ CCCTGCCCATGGCCAAGCAGAAA  
SRR516264.60940391.2+ CCCTGCCCATGGCCAAGCAGAAA  
SRR516253.84549442.2+ CCCTGCCCATGGCCAAGCAGAAA  
SRR516256.24075489.2- CCCTGCCCATGGCCAAGCAGAAA  
SRR516268.48113730.2+ CCCTGCCCATGGCCAAGCAGAAA  
SRR516262.21781133.1+ CCCTGCCCATGGCCAAGCAGAAA  
SRR516255.31500806.1+ CCCTGCCCATGGCCAAGCAGAAA  
SRR516254.34872139.1+ CCCTGCCCATGGCCAAGCAGAAA  
SRR516255.25565504.2+ CCCTGCCCATGGCCAAGCAGAAA  
SRR516256.10718488.1+ CCCTGCCCATGGCCAAGCAGAAA  
SRR516258.18487741.1- CCCTGCCCATGGCCAAGCAGAAA  
SRR516255.3305445.1+ CCCTGCCCATGGCCAAGCAGAAA  
SRR516258.75491064.2- CCCTGCCCATGGCCAAGCAGAAA  
SRR516258.75491067.2- CCCTGCCCATGGCCAAGCAGAAA  
SRR516253.19465821.1+ CCCTGCCCATGGCCAAGCAGAAA  
SRR516253.365320.1- CCCTGCCCATGGCCAAGCAGAAA  
SRR516253.5211449.2- CCCTGCCCATGGCCAAGCAGAAA  
SRR516253.57040134.2+ CCCTGCCCATGGCCAAGCAGAAA  
SRR516253.57322287.2+ CCCTGCCCATGGCCAAGCAGAAA  
SRR516253.64655527.2- CCCTGCCCATGGCCAAGCAGAAA  
SRR516253.67066187.1- CCCTGCCCATGGCCAAGCAGAAA  
SRR516253.72746215.2+ CCCTGCCCATGGCCAAGCAGAAA  
SRR516253.80551265.1+ CCCTGCCCATGGCCAAGCAGAAA  
SRR516254.41602867.2- CCCTGCCCATGGCCAAGCAGAAA  
SRR516254.52808494.1+ CCCTGCCCATGGCCAAGCAGAAA  
SRR516254.54211738.2+ CCCTGCCCATGGCCAAGCAGAAA  
SRR516254.56196602.2- CCCTGCCCATGGCCAAGCAGAAA  
SRR516254.59112408.2- CCCTGCCCATGGCCAAGCAGAAA  
SRR516254.86674766.1- CCCTGCCCATGGCCAAGCAGAAA  
SRR516255.21474988.1+ CCCTGCCCATGGCCAAGCAGAAA  
SRR516255.31773466.2+ CCCTGCCCATGGCCAAGCAGAAA  
SRR516255.64448961.2- CCCTGCCCATGGCCAAGCAGAAA  
SRR516255.81054542.1- CCCTGCCCATGGCCAAGCAGAAA  
SRR516256.18160700.1+ CCCTGCCCATGGCCAAGCAGAAA  
SRR516256.29806347.2+ CCCTGCCCATGGCCAAGCAGAAA

SRR516257.20295656.1+ CCCTGCCCATGGCCAAGCAGAAACACCATGTCTACAAGGtaaaattgcagtcctgtcttac  
SRR516257.25331442.1+ CCCTGCCCATGGCCAAGCAGAAACACCATGTCTACAAGGtaaaattgcagtcctgtcttac  
SRR516257.51968353.1- CCCTGCCCATGGCCAAGCAGAAACACCATGTCTACAAGGtaaaattgcagtcctgtcttac  
SRR516257.51968354.1- CCCTGCCCATGGCCAAGCAGAAACACCATGTCTACAAGGtaaaattgcagtcctgtcttac  
SRR516257.63892613.1- CCCTGCCCATGGCCAAGCAGAAACACCATGTCTACAAGGtaaaattgcagtcctgtcttac  
SRR516258.20261841.2+ CCCTGCCCATGGCCAAGCAGAAACACCATGTCTACAAGGtaaaattgcagtcctgtcttac  
SRR516258.36659311.1+ CCCTGCCCATGGCCAAGCAGAAACACCATGTCTACAAGGtaaaattgcagtcctgtcttac  
SRR516258.39846263.1+ CCCTGCCCATGGCCAAGCAGAAACACCATGTCTACAAGGtaaaattgcagtcctgtcttac  
SRR516258.39846269.1+ CCCTGCCCATGGCCAAGCAGAAACACCATGTCTACAAGGtaaaattgcagtcctgtcttac  
SRR516258.43616193.2+ CCCTGCCCATGGCCAAGCAGAAACACCATGTCTACAAGGtaaaattgcagtcctgtcttac  
SRR516258.43616196.2+ CCCTGCCCATGGCCAAGCAGAAACACCATGTCTACAAGGtaaaattgcagtcctgtcttac  
SRR516258.44928883.2- CCCTGCCCATGGCCAAGCAGAAACACCATGTCTACAAGGtaaaattgcagtcctgtcttac  
SRR516258.56007600.1- CCCTGCCCATGGCCAAGCAGAAACACCATGTCTACAAGGtaaaattgcagtcctgtcttac  
SRR516258.59882969.1- CCCTGCCCATGGCCAAGCAGAAACACCATGTCTACAAGGtaaaattgcagtcctgtcttac  
SRR516261.64488870.1+ CCCTGCCCATGGCCAAGCAGAAACACCATGTCTACAAGGtaaaattgcagtcctgtcttac  
SRR516261.64488872.1+ CCCTGCCCATGGCCAAGCAGAAACACCATGTCTACAAGGtaaaattgcagtcctgtcttac  
SRR516262.2173080.1- CCCTGCCCATGGCCAAGCAGAAACACCATGTCTACAAGGtaaaattgcagtcctgtcttac  
SRR516263.16702536.2- CCCTGCCCATGGTCAAGCAGAAACACCATGTCTACAAGGtaaaattgctgtctttcttac  
SRR516257.77010811.1- CCTGCCCATGGCCAAGCAGAAACACCATGTCTACAAGGtaaaattgcagtcctgtcttac  
SRR516257.88172373.2+ CTGCCCATGGCCAAGCAGAAACACCATGTCTACAAGGtaaaattgcagtcctgtcttac  
SRR516258.34238218.1+ CTGCCCATGGCCAAGCAGAAACACCATGTCTACAAGGtaaaattgcagtcctgtcttac  
SRR516258.51540927.2- CTGCCCATGGCCAAGCAGAAACACCATGTCTACAAGGtaaaattgcagtcctgtcttac  
SRR516253.4239929.1+ TGCCCATGGCCAAGCAGAAACACCATGTCTACAAGGtaaaattgcagtcctgtcttac  
SRR516254.79124957.1- CCCATGGCCAAGCAGAAACACCATGTCTACAAGGtaaaattgcagtcctgtcttac  
SRR516258.27992696.2+ CCATGGCCAAGCAGAAACACCATGTCTACAAGGtaaaattgcagtcctgtcttac  
SRR516261.77778183.1+ CCATGGCCAAGCAGAAACACCATGTCTACAAGGtaaaattgcagtcctgtcttac  
SRR516261.77778184.1+ CCATGGCCAAGCAGAAACACCATGTCTACAAGGtaaaattgcagtcctgtcttac  
SRR516261.77778186.1+ CCATGGCCAAGCAGAAACACCATGTCTACAAGGtaaaattgcagtcctgtcttac  
SRR516259.7378581.2+ CATGGCCAAGCAGAAACACCATGTCTACAAGGtaaaattgcagtcctgtcttac  
SRR516257.17384372.1+ GGCCAAGCAGAAACACCATGTCTACAAGGtaaaattgcagtcctgtcttac  
SRR516264.62082534.2- GGCCAAGCAGAAACACCATGTCTACAAGGtaaaattgcagtcctgtcttac  
SRR516264.69513869.2+ GGCCAAGCAGAAACACCATGTCTACAAGGtaaaattgcagtcctgtcttac  
SRR516255.70485066.2- CCAAGCAGAAACACCATGTCTACAAGGtaaaattgcagtcctgtcttac  
SRR516255.1697326.2- CAAGCAGAAACACCATGTCTACAAGGtaaaattgcagtcctgtcttac  
SRR516258.15077561.2- CAAGCAGAAACACCATGTCTACAAGGtaaaattgcagtcctgtcttac  
SRR516263.50529282.2- CAAGCAGAAACACCATGTCTACAAGGtaaaattgcagtcctgtcttac  
SRR516263.50529284.2- CAAGCAGAAACACCATGTCTACAAGGtaaaattgcagtcctgtcttac  
SRR516257.1728763.2- AAGCAGAAACCCCATGTCTACAAGGtaaaattgcagtcctgtcttac  
SRR516257.17888695.1+ AAGCAGAAACACCATGTCTACAAGGtaaaattgcagtcctgtcttac  
SRR516258.16266909.1- AAGCAGAAACACCATGTCTACAAGGtaaaattgcagtcctgtcttac  
SRR516257.14316028.2- AGCAGAAACACCATGTCTACAAGGtaaaattgcagtcctgtcttac  
SRR516259.52283762.1- AGCAGAAACACCATGTCTACAAGGtaaaattgcagtcctgtcttac  
SRR516258.26021878.2- GCAGAAACACCATGTCTACAAGGtaaaattgcagtcctgtcttac  
SRR516268.28649267.2+ GCAGAAACACCATGTCTACAAGGtaaaattgcagtcctgtcttac  
SRR516254.62410953.1- CAGAAACACCATGTCTACAAGGtaaaattgcagtcctgtcttac  
SRR516262.15483265.1- CAGAAACACCATGTCTACAAGGtaaaattgcagtcctgtcttac  
SRR516254.70243913.2+ AGAAACACCATGTCTACAAGGtaaaattgcagtcctgtcttac  
SRR516255.70481761.1- AGAAACACCATGTCTACAAGGtaaaattgcagtcctgtcttac  
SRR516258.54033688.2+ GAAACACCATGTCTACAAGGtaaaattgcagtcctgtcttac  
SRR516262.18560856.2+ GAAACACCATGTCTACAAGGtaaaattgcagtcctgtcttac  
SRR516268.60041106.1+ GAAACACCATGTCTACAAGGtaaaattgcagtcctgtcttac  
SRR516268.60041107.1+ GAAACACCATGTCTACAAGGtaaaattgcagtcctgtcttac  
SRR516255.48156284.1- AAACACCATGTCTACAAGGtaaaattgcagtcctgtcttac  
SRR516261.32323269.1+ AAACACCATGTCTACAAGGtaaaattgcagtcctgtcttac  
SRR516254.18031680.1- AACACCATGTCTACAAGGtaaaattgcagtcctgtcttac  
SRR516257.60080163.1+ AACACCATGTCTACAAGGtaaaattgcagtcctgtcttac  
SRR516258.65537777.2- ACACCATGTCTACAAGGtaaaattgcagtcctgtcttac  
SRR516253.15894140.2+ CACCATGTCTACAAGGtaaaattgcagtcctgtcttac  
SRR516254.34872139.2+ CACCATGTCTACAAGGtaaaattgcagtcctgtcttac  
SRR516255.31500806.2- CACCATGTCTACAAGGtaaaattgcagtcctgtcttac  
SRR516257.7070288.1+ CACCATGTCTACAAGGtaaaattgcagtcctgtcttac  
SRR516258.38065682.1+ CACCATGTCTACAAGGtaaaattgcagtcctgtcttac  
SRR516258.70632626.2+ CACCATGTCTACAAGGtaaaattgcagtcctgtcttac  
SRR516253.84549442.1- CCATGTCTACAAGGtaaaattgcagtcctgtcttac  
SRR516266.1137482.2- CCATGTCTACAAGGtaaaattgcagtcctgtcttac  
SRR516257.76140564.2+ CATGTCTACAAGGtaaaattgcagtcctgtcttac  
SRR516257.76140570.2+ CATGTCTACAAGGtaaaattgcagtcctgtcttac  
SRR516261.21596646.2+ CATGTCTACAAGGtaaaattgcagtcctgtcttac  
SRR516253.19465821.2- ATGTCTACAAGGtaaaattgcagtcctgtcttac  
SRR516257.11274248.1- ATGTCTACAAGGtaaaattgcagtcctgtcttac  
SRR516257.4266993.1+ TGTCTACAAGGtaaaattgcagtcctgtcttac  
SRR516258.23794530.1+ TGTCTACAAGGtaaaattgcagtcctgtcttac  
SRR516263.17371779.1- GTCTACAAGGtaaaattgcagtcctgtcttac  
SRR516267.18227146.2- GTCTACAAGGtaaaattgcagtcctgtcttac  
SRR516258.14228804.1- TCTACAAGGtaaaattgcagtcctgtcttac  
SRR516262.8153223.2- TCTACAAGGtaaaattgcagtcctgtcttac  
SRR516262.8153225.2- TCTACAAGGtaaaattgcagtcctgtcttac  
SRR516262.8155974.2- TCTACAAGGtaaaattgcagtcctgtcttac  
SRR516266.11706985.1- TCTACAAGGtaaaattgcagtcctgtcttac  
SRR516256.20061014.1- CTACAAGGtaaaattgcagtcctgtcttac  
SRR516257.57533481.1+ CTACAAGGtaaaattgcagtcctgtcttac  
SRR516258.4196313.1+ CTACAAGGtaaaattgcagtcctgtcttac  
SRR516254.6572721.1+ TACAAGGtaaaattgcagtcctgtcttac  
SRR516255.3305445.2- TACAAGGtaaacattgcagtcctgtcttac

SRR516255.42804038.1+  
SRR516256.13911759.1-  
SRR516255.62696371.2+  
SRR516258.73534913.1-  
SRR516263.39307261.1-  
SRR516263.39307262.1-  
SRR516268.28354153.2+  
SRR516268.5144193.2+  
SRR516257.34678406.1+  
SRR516258.46278282.2-

TACAAGgtaaaattgcagctctgtcttac  
TACAAGgtaaaattgcagctctgtcttac  
ACAAGgtaaaattgcagctctgtcttac  
CAAGgtaaaattgcagctctgtcttac  
AGgtaaaattgcagctctgtcttac  
AGgtaaaattgcagctctgtcttac  
AGgtaaaattgcagctctgtcttac  
AGgtaaaattgcagctctgtcttac  
Ggtaaaattgcagctctgtcttac  
Ggtaaaattgcagctctgtcttac

consensus

CCCTGCCCATGGCCAAGCAGAAACACCATGTCTACAAGgtaaaattgcagctctgtcttac

---

# O. Cuckoo roller (No. 22), exon 4, WGS data

- CAP3 alignment of WGS data spanning exon 4 (uppercase letters)

```
      .   :   .   :   .   :   .   :   .   :
SRR956935.33226072.2+  tcctgtgcccagggaacctcaggtgacttgtgtgtgtttatctttccagTTT
SRR956934.5726880.1+  tcctgtgcccagggaacctcaggtgacttgtgtgtgtttcctttccagTTG
SRR956933.15501326.2-  tcctgtgcccagggaacctcaggtgacttgtgtgtgtttcctttccagTTTGCCATTCC
SRR956933.47824422.2-  tcctgtgcccagggaacctcaggtgacttgtgtgtgtttcctttccagTTTGCCATTCC
SRR956933.49304017.2-  tcctgtgcccagggaacctcaggtgacttgtgtgtgtttcctttccagTTTGCCATTCC
SRR956933.5354156.1-  tcctgtgcccagggaacctcaggtgacttgtgtgtgtttcctttccagTTTGCCATTCT
SRR956933.67330544.1+  tcctgtgcccagggaacctcaggtgacttgtgtgtgtttcctttccagTTTGCCATTCT
SRR956933.79339270.2+  tcctgtgcccagggaacctcaggtgacttgtgtgtgtttcctttccagTTTGCCATTCC
SRR956934.17462198.1-  tcctgtgcccagggaacctcaggtgacttgtgtgtgtttcctttccagTTTGCCATTCT
SRR956934.49589762.1+  tcctgtgcccagggaacctcaggtgacttgtgtgtgtttcctttccagTTTGCCATTCT
SRR956934.50976425.1-  tcctgtgcccagggaacctcaggtgacttgtgtgtgtttcctttccagTTTGCCATTCT
SRR956934.73010703.1-  tcctgtgcccagggaacctcaggtgacttgtgtgtgtttcctttccagTTTGCCATTCC
SRR956935.14673017.1+  tcctgtgcccagggaacctcaggtgacttgtgtgtgtttcctttccagTTTGCCATTCT
SRR956935.28715952.2+  tcctgtgcccagggaacctcaggtgacttgtgtgtgtttcctttccagTTTGCCATTCT
SRR956935.36152290.1-  tcctgtgcccagggaacctcaggtgacttgtgtgtgtttcctttccagTTTGCCATTCT
SRR956933.40761063.2-  tcctgtgcccagggaacctcaggtgacttgtgtgtgtttcctttccagTTTGCCATTCT
SRR956933.86377582.2+  cctgtgcccagggaacctcaggtgacttgtgtgtgtttcctttccagTTTGCCATTCC
SRR956934.23198342.1+  cctgtgcccagggaacctcaggtgacttgtgtgtgtttcctttccagTTTGCCATTCT
SRR956933.63677473.2+  gccagggaacctcaggtgacttgtgtgtgtttcctttccagTTTGCCATTCC
SRR956934.56341547.2-  gccagggaacctcaggtgacttgtgtgtgtttcctttccagTTTGCCATTCT
SRR956933.75568344.2+  cctcaggtgacttgtgtgtgtttcctttccagTTTGCCATTCT
SRR956933.28530959.1+  tgacttgtgtgtgtttcctttccagTTTGCCATTCT
SRR956933.69159347.1+  tgacttgtgtgtgtttcctttccagTTTGCCATTCT
SRR956935.27409973.1-  gacttgtgtgtgtttcctttccagTTTGCCATTCT
SRR956935.14577549.1-  cttgtgtgtgtttcctttccagTTTGCCATTCC
SRR956934.33032496.2+  tttccagTTTGCCATTCC
SRR956935.4217570.2+  CCATTCT
SRR956934.31868316.1+  CATTCC
SRR956933.79339270.1-  ATTCC
SRR956933.14838491.1+  TCT
SRR956934.62812362.2+  TCT
SRR956934.21178397.1+  T
SRR956935.35147434.2-  C
```

consensus tcctgtgcccagggaacctcaggtgacttgtgtgtgtttcctttccagTTTGCCATTCT

```
      .   :   .   :   .   :   .   :   .   :
SRR956935.14673017.1+  AGC
SRR956934.73010703.1-  AGCTGAAGAAA
SRR956935.28715952.2+  AGCTGAAGAAAC
SRR956934.17462198.1-  AGCTGAAGAAACCAATAT
SRR956933.67330544.1+  AGCTGAAGAAACCAATATG
SRR956933.49304017.2-  AGCTGAAGAAACCAATATGCAT
SRR956934.49589762.1+  AGCTGAAGAAACCAATATGCATGTACCTT
SRR956933.15501326.2-  AGCTGAAGAAACCAATATGCATGTACCTTTAT
SRR956935.36152290.1-  AGCTGAAGAAACCAATATGCATGTACCTTTAT
SRR956933.5354156.1-  AGCTGAAGAAACCAATATGCATGTACCTTTATCCC
SRR956934.50976425.1-  AGCTGAAGAAACCAATATGCATGTACCTTTATCCCA
SRR956933.79339270.2+  AGCTGAAGAAACCAATATGCATGTACCTTTATCCCA
SRR956935.40761063.2-  AGCTGAAGAAACCAATATGCATGTACCTTTATCCCA
SRR956933.47824422.2-  AGCTGAAGAAACCAATATGCATGTACCTTTATCCCCT
SRR956933.86377582.2+  AGCTGAAGAAACCAATATGCATGTACCTTTATCCCCTGCC
SRR956934.23198342.1+  AGCTGAAGAAACCAATATGCATGTACCTTTATCCCCTGCC
SRR956933.63677473.2+  AGCTGAAGAAACCAATATGCATGTACCTTTATCCCCTGCCCATGG
SRR956934.56341547.2-  AGCTGAAGAAACCAATATGCATGTACCTTTATCCCCTGCCCATGG
SRR956934.21178397.1+  AGCTGAAGAAACCAATATGCATGTACCTTTATCCCCTGCCCATGGTCAGCAGAAA
SRR956933.75568344.2+  AGCTGAAGAAACCAATATGCATGTACCTTTATCCCCTGCCCATGGTCAGCAGAAAAC
SRR956933.14838491.1+  AGCTGAAGAAACCAATATGCATGTACCTTTATCCCCTGCCCATGGTCAGCAGAAAACAC
SRR956933.28530959.1+  AGCTGAAGAAACCAATATGCATGTACCTTTATCCCCTGCCCATGGTCAGCAGAAAACAC
SRR956933.69159347.1+  AGCTGAAGAAACCAATATGCATGTACCTTTATCCCCTGCCCATGGTCAGCAGAAAACAC
SRR956933.79339270.1-  AGCTGAAGAAACCAATATGCATGTACCTTTATCCCCTGCCCATGGTCAGCAGAAAACAC
SRR956934.31868316.1+  AGCTGAAGAAACCAATATGCATGTACCTTTATCCCCTGCCCATGGTCAGCAGAAAACAC
SRR956934.33032496.2+  AGCTGAAGAAACCAATATGCATGTACCTTTATCCCCTGCCCATGGTCAGCAGAAAACAC
SRR956934.62812362.2+  AGCTGAAGAAACCAATATGCATGTACCTTTATCCCCTGCCCATGGTCAGCAGAAAACAC
SRR956935.14577549.1-  AGCTGAAGAAACCAATATGCATGTACCTTTATCCCCTGCCCATGGTCAGCAGAAAACAC
SRR956935.27409973.1-  AGCTGAAGAAACCAATATGCATGTACCTTTATCCCCTGCCCATGGTCAGCAGAAAACAC
SRR956935.35147434.2-  AGCTGAAGAAACCAATATGCATGTACCTTTATCCCCTGCCCATGGTCAGCAGAAAACAC
SRR956935.4217570.2+  AGCTGAAGAAACCAATATGCATGTACCTTTATCCCCTGCCCATGGTCAGCAGAAAACAC
SRR956935.35312808.1+  CTTGAAGAAACCAATATGCATGTACCTTTATCCCCTGCCCATGGTCAGCAGAAAACAC
SRR956933.67330544.2-  AAGAAACCAATATGCATGTACCTTTATCCCCTGCCCATGGTCAGCAGAAAACAC
SRR956933.86377582.1-  AGAAACCAATATGCATGTACCTTTATCCCCTGCCCATGGTCAGCAGAAAACAC
SRR956933.47299640.2+  GAAACCAATATGCATGTACCTTTATCCCCTGCCCATGGTCAGCAGAAAACAC
SRR956935.36662711.1+  CAAATATGCATGTACCTTTATCCCCTGCCCATGGTCAGCAGAAAACAC
SRR956934.63625329.1+  GCATGTACCTTTATCCCCTGCCCATGGTCAGCAGAAAACAC
SRR956934.73546604.2+  CCTTTATCCCCTGCCCATGGTCAGCAGAAAACAC
```



SRR956935.64705649.1- CTTTATCCCCCTGCCATGGTCAGCAGAAACCC  
SRR956933.10080307.2+ GCCCATGGTCAGCAGAAACAC  
SRR956933.63677473.1- GCCCCTGGTCAGCAGAAACCC  
SRR956934.36665069.2- GCCCAAGGTCAGCAGAAACAC  
SRR956935.32484767.1+ GCCCATGGTCAGCAGAAACAC  
SRR956935.24603228.1+ CCATGGTCAGCAGAAACAC  
SRR956934.64268426.2- GGTCAGCAGAAACAC  
SRR956934.58087977.1- AAACCC

consensus

AGCTGAAGAAACCAAAATATGCATGTACCTTTATCCCCTGCCATGGTCAGCAGAAACAC

. : . : . : . : . : . :  
SRR956933.28530959.1+ CGTA  
SRR956933.69159347.1+ CGTA  
SRR956935.27409973.1- CGTAT  
SRR956935.14577549.1- CGTATCT  
SRR956934.33032496.2+ CGTATCTACAAGgtaaacttgc  
SRR956935.4217570.2+ CGTATCTACAAGgtaaacttgcaggctgcctta  
SRR956934.31868316.1+ CGTATCTACAAGgtaaacttgcaggctgccttac  
SRR956933.79339270.1- CGTATCTACAAGgtaaacttgcaggctgccttact  
SRR956933.14838491.1+ CGTATCTACAAGgtaaacttgcaggctggcttactgg  
SRR956934.62812362.2+ CGTATCTACAAGgtaaacttgcaggctgccttactgg  
SRR956935.35147434.2- CGTATCTACAAGgtaaacttgcaggctgccttactgggg  
SRR956935.35312808.1+ CGTATCTACAAGgtaaacttgcaggctgccttactggggg  
SRR956933.67330544.2- CGTATCTACAAGgtaaacttgcaggctgccttactggggaaaaaa  
SRR956933.86377582.1- CGTATCTACAAGgtaaacttgcaggctgccttactggggaaaaaa  
SRR956933.47299640.2+ CGTATCTACAAGgtaaacttgcaggctgccttactggggaaaaaa  
SRR956934.73546604.2+ CGTATCTACAAGgtaaacttgcaggctgccttactggggaaaaaa  
SRR956935.36662711.1+ CGTATCTACAAGgtaaacttgcaggctgccttactggggaaaaaa  
SRR956933.63677473.1- CGTATCTACAAGgtaaacttgcaggctgccttactggggaaaaaa  
SRR956933.10080307.2+ CGTATCTACAAGgtaaacttgcaggctgccttactggggaaaaaa  
SRR956935.32484767.1+ CGTATCTACAAGgtaaacttgcaggctgccttactggggaaaaaa  
SRR956934.36665069.2- CGTATCTACAAGgtaaacttgcaggctgccttactggggaaaaaa  
SRR956934.63625329.1+ CGTATCTACAAGgtaaacttgcaggctgccttactggggaaaaaa  
SRR956935.24603228.1+ CGTATCTACAAGgtaaacttgcaggctgccttactggggaaaaaa  
SRR956935.64705649.1- CGTATTTACAAGgtaaacttgcaggctgccttactggggaaaaaa  
SRR956934.58087977.1- CGTATCTACAAGgtaaacttgcaggctgccttactggggaaaaaa  
SRR956934.64268426.2- CGTATCTACAAGgtaaacttgcaggctgccttactggggaaaaaa-gg  
SRR956934.32598380.1- ATCTACAAGgtaaacttgcaggctgccttacggggaaaaaa  
SRR956935.64634243.2- ATCTACAAGgtaaccttggaggctgccttactggggaaaaaa

consensus

CGTATCTACAAGgtaaacttgcaggctgccttactggggaaaaaa

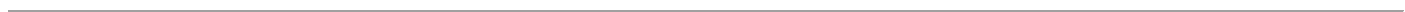

## P. Speckled mousebird (No. 23), exon 4, WGS data

- CAP3 alignment of WGS data spanning exon 4 (uppercase letters)

---

```
SRR955003.105491392.1+ tgggtggtttcttttccaaTTGCTGCTCCAGTTGAAAAAACCTAGCATGTCTGTACCTTT
SRR955003.70259149.1-  tggttcttttccaaTTGCTGCTCCAGTTGAAAAAACCTAGCATGTCTGTACCTTT
SRR955003.24405349.2-  ttttccaaTTGCTGCTCCAGTTGAAAAAACCTAGCATGTCTGTACCTTT
SRR955004.35002639.1-  ccaaTTGCTGCTCCAGTTGAAAAAACCTAGCATGTCTGTACCTTT
SRR955003.110630919.1+  TTGCTGCTCCAGTTGAAAAAACCTAGCATGTCTGTACCTTT
SRR955003.33105841.1+  TGCTCCAGTTGAAAAAACCTAGCATGTCTGTACCTTT
SRR955004.25917219.2+  TCCAGTTGAAAAAACCTAGCATGTCTGTACCTTT
SRR955004.60388681.1+  TTGAAAAAACCTAGCATGTCTGTACCTTT
SRR955003.37653578.1-  AACCTAGCATGTCTGTACCTTT
SRR955003.28157826.2+  ATGTCTGTACCTTT
SRR955003.21063446.1+  CTGTACCTTT
SRR955003.98399332.1+  TGTACCTTT
SRR955003.50352646.2-  GTACCTTT
SRR955003.94750184.1+  TACCTTT
SRR955003.58074590.2+  CCTTT
SRR955003.84103845.1+  CCTTT
SRR955003.110836653.1+  CTTT
SRR955003.107556485.1+  T
```

```
consensus tgggtggtttcttttccaaTTGCTGCTCCAGTTGAAAAAACCTAGCATGTCTGTACCTTT
```

---

```
SRR955003.105491392.1+ ATGCCACTGACCATGGCCAAGCAGAACTATTATCAAG
SRR955003.70259149.1-  ATGCCACTGACCATGGCCAAGCAGAACTATTATCAAGgtaa
SRR955003.24405349.2-  ATGCCACTGACCATGGCCAAGCAGAACTATTATCAAGgtaaatttgc
SRR955004.35002639.1-  ATGCCACTGACCATGGCCAAGCAGAACTATTATCAAGgtaaatttgcagg
SRR955003.110630919.1+ ATGCCACTGACCATGGCCAAGCAGAACTATTATCAAGgtaaatttgcagggttgcct
SRR955003.107556485.1+ ATGCCACTGACCATGGCCAAGCAGAACTATTATCAAGgtaaatttgcagggttgcctt
SRR955003.110836653.1+ ATGCCACTGACCATGGCCAAGCAGAACTATTATCAAGgtaaatttgcagggttgcctt
SRR955003.21063446.1+ ATGCCACTGACCATGGCCAAGCAGAACTATTATCAAGgtaaatttgcagggttgcctt
SRR955003.28157826.2+ ATGCCACTGACCATGGCCAAGCAGAACTATTATCAAGgtaaatttgcagggttgcctt
SRR955003.33105841.1+ ATGCCACTGACCATGGCCAAGCAGAACTATTATCAAGgtaaatttgcagggttgcctt
SRR955003.37653578.1- ATGCCACTGACCATGGCCAAGCAGAACTATTATCAAGgtaaatttgcagggttgcctt
SRR955003.50352646.2- ATGCCACTGACCATGGCCAAGCAGAACTATTATCAAGgtaaatttgcagggttgcctt
SRR955003.58074590.2+ ATGCCACTGACCATGGCCAAGCAGAACTATTATCAAGgtaaatttgcagggttgcctt
SRR955003.84103845.1+ ATGCCACTGACCATGGCCAAGCAGAACTATTATCAAGgtaaatttgcagggttgcctt
SRR955003.94750184.1+ ATGCCACTGACCATGGCCAAGCAGAACTATTATCAAGgtaaatttgcagggttgcctt
SRR955003.98399332.1+ ATGCCACTGACCATGGCCAAGCAGAACTATTATCAAGgtaaatttgcagggttgcctt
SRR955004.25917219.2+ ATGCCACTGACCATGGCCAAGCAGAACTATTATCAAGgtaaatttgaagggttgcctt
SRR955004.60388681.1+ ATGCCACTGACCATGGCCAAGCAGAACTATTATCAAGgtaaatttgcagggttgcctt
SRR955003.94738916.1-  CACTGACCATGGCCAAGCAGAACTATTATCAAGgtaaatttgcagggttgcctt
SRR955003.76475839.2-  ACCATGGCCAAGCAGAACTATTATCAAGgtaaatttgcagggttgcctt
SRR955003.37307100.2+  CAGAACTATTATCAAGgtaaatttgcagggttgcctt
SRR955003.75057278.2+  AGAACTATTATCAAGgtaaatttgcagggttgcctt
SRR955004.24836517.2-  AGAACTATTATCAAGgtaaatttgcagggttgcctt
SRR955004.63401237.2-  GAACTATTATCAAGgtaaatttgcagggttgcctt
SRR955003.9914472.2-  AAACCTATTATCAAGgtaaatttgcagggttgcctt
SRR955004.31681147.2+  AACCTATTATCAAGgtaaatttgcagggttgcctt
SRR955004.42573459.2-  CTATTATCAAGgtaaatttgcagggttgcctt
SRR955004.4298586.2+  CTATTATCAAGgtaaatttgcagggttgcctt
SRR955003.86841563.1+  CAAGgtaaatttgcagggttgcctt
SRR955003.57069806.1-  AAGgtaaatttgcagggttgcctt
```

```
consensus ATGCCACTGACCATGGCCAAGCAGAACTATTATCAAGgtaaatttgcagggttgcctt
```

---

## Q. Sunbittern (No. 29), exon 4, WGS data

- CAP3 alignment of WGS data spanning exon 4 (uppercase letters)

```
SRR955403.36605629.1+ gttgccacagaaaccttcaggtgactccttggtctgtttctttccagT
SRR955403.3947585.1+ gttgccacagaaaccttcaggtgactccttggtctgtttctttccagTT
SRR955405.22537442.1- gttgccacagaaaccttcaggtgactccttggtctgtttctttccagTT
SRR955403.94847071.2- gttgccacagaaaccttcaggtgactccttggtctgtttctttccagTTT
SRR955405.46669857.1- gttgccacagaaaccttcaggtgactccttggtctgtttctttccagTTT
SRR955403.104048366.2- gttgccacagaaaccttcaggtgactccttggtctgtttctttccagTTTGGT
SRR955403.67206227.1+ gttgccacagaaaccttcaggtgactccttggtctgtttctttccagTTTGGTTG
SRR955405.34734344.1+ gttgccacagaaaccttcaggtgactccttggtctgtttctttccagTTTGGTTG
SRR955403.20178932.2- gttgccacagaaaccttcaggtgactccttggtctgtttctttccagTTTGGTTGTTCC
SRR955403.11572506.2+ gttgccacagaaaccttcaggtgactccttggtctgtttctttccagTTTGGTTGTTCC
SRR955403.1418969.1- gttgccacagaaaccttcaggtgactccttggtctgtttctttccagTTTGGTTGTTCC
SRR955405.18890725.1- gttgccacagaaaccttcaggtgactccttggtctgtttctttccagTTTGGTTGTTCC
SRR955403.73606013.2+ gttgccacagaaaccttcaggtgactccttggtctgtttctttccagTTTGGTTGTTCC
SRR955404.29078451.1- gttgccacagaaaccttcaggtgactccttggtctgtttctttccagTTTGGTTGTTCC
SRR955404.54624084.1+ gttgccacagaaaccttcaggtgactccttggtctgtttctttccagTTTGGTTGTTCC
SRR955405.19027456.2- gttgccacagaaaccttcaggtgactccttggtctgtttctttccagTTTGGTTGTTCC
SRR955405.2762221.1- gttgccacagaaaccttcaggtgactccttggtctgtttctttccagTTTGGTTGTTCC
SRR955405.48827651.1- gttgccacagaaaccttcaggtgactccttggtctgtttctttccagTTTGGTTGTTCC
SRR955405.50023141.1- gttgccacagaaaccttcaggtgactccttggtctgtttctttccagTTTGGTTGTTCC
SRR955405.58084698.1- gttgccacagaaaccttcaggtgactccttggtctgtttctttccagTTTGGTTGTTCC
SRR955403.26514073.2+ gccacagaaaccttcaggtgactccttggtctgtttctttccagTTTGGTTGTTCC
SRR955404.56098309.2+ gccacagaaaccttcaggtgactccttggtctgtttctttccagTTTGGTTGTTCC
SRR955405.49245645.1+ gccacagaaaccttcaggtgactccttggtctgtttctttccagTTTGGTTGTTCC
SRR955405.15935601.1- accttcaggtgactccttggtctgtttctttccagTTTGGTTGTTCC
SRR955404.6929864.1+ t gactccttggtctgtttctttccagTTTGGTTGTTCC
SRR955403.74943617.2- g actccttggtctgtttctttccagTTTGGTTGTTCC
SRR955403.83080227.1+ g actccttggtctgtttctttccagTTTGGTTGTTCC
SRR955404.32490642.1+ g actccttggtctgtttctttccagTTTGGTTGTTCC
SRR955404.34527715.1+ g actccttggtctgtttctttccagTTTGGTTGTTCC
SRR955405.18081326.1+ g actccttggtctgtttctttccagTTTGGTTGTTCC
SRR955403.48102659.2+ a ctcttggtctgtttctttccagTTTGGTTGTTCC
SRR955404.27558151.2- t gttctttccagTTTGGTTGTTCC
SRR955403.105372963.2- g tttctttccagTTTGGTTGTTCC
SRR955404.26773079.1- g tttctttccagTTTGGTTGTTCC
SRR955404.21667925.2- c agTTTGGTTGTTCC
SRR955405.12019009.2- c agTTTGGTTGTTCC
SRR955405.40333455.2+ a gTTTGGTTGTTCC
SRR955403.18781244.2- T TGGTTGTTCC
SRR955404.52396791.1- T TGGTTGTTCC
SRR955404.8824301.1- T TGGTTGTTCC
SRR955405.17028899.1- T TGGTTGTTCC
SRR955405.1899247.2- T TGGTTGTTCC
SRR955405.7466411.1- T TGGTTGTTCC
SRR955405.74881191.1- T TGGTTGTTCC
SRR955403.54489646.2+ G TTGTTCC
SRR955405.31368143.1- T GTTCC
SRR955404.81836800.1- G TTCC
SRR955405.59475718.1- T CCT
SRR955403.43269048.2- T CCT
SRR955403.93811490.1- T CCT
SRR955404.10640934.1- T CCT
SRR955404.20012032.1- T CCT
SRR955404.3517446.1- T CCT
SRR955404.40600314.1- T CCT
SRR955404.43181078.1- T CCT
SRR955404.49301553.1- T CCT
SRR955405.75901177.2+ C CT
SRR955403.92666487.2- T
```

consensus

gttgccacagaaaccttcaggtgactccttggtctgtttctttccagTTTGGTTGTTCC

```
SRR955405.58084698.1- G
SRR955403.18890725.1- GTT
SRR955405.50023141.1- GTTGAAGAAAACA
SRR955405.19027456.2- GTTGAAGAAAACAAGT
SRR955404.54624084.1+ GTTGAAGAAAACAAGTATGCCGGTG
SRR955404.29078451.1- GTTGAAGAAAACAAGTATGCCGGTGC
SRR955403.73606013.2+ GTTGAAGAAAACAAGTATGCCGGTGCCCTTAT
SRR955405.2762221.1- GTTGAAGAAAACAAGTATGCCGGTGCCCTTATCCCACT
SRR955403.1418969.1- GTTGAAGAAAACAAGTATGCCGGTGCCCTTATCCCACTGC
SRR955403.26514073.2+ GTTGAAGAAAACAAGTATGCCGGTGCCCTTATCCCACTGCCTG
SRR955404.56098309.2+ GTTGAAGAAAACAAGTATGCCGGTGCCCTTATCCCACTGCCTG
SRR955405.49245645.1+ GTTGAAGAAAACAAGTATGCCGGTGCCCTTATCCCACTGCCTG
SRR955405.15935601.1- GTTGAAGAAAACAAGTATGCCGGTGCCCTTATCCCACTGCCTGTGGTCGAGC
```

SRR955403.83080227.1+ GTTGAAGAAAACAAGTATGCCGGTGCCTTTATCCCACTGCCTGTGGTCGAGCAGAAAAC  
SRR955403.105372963.2- GTTGAAGAAAACAAGTATGCCGGTGCCTTTATCCCACTGCCTGTGGTCGAGCAGAAAACA  
SRR955403.18781244.2- GTTGAAGAAAACAAGTATGCCGGTGCCTTTATCCCACTGCCTGTGGTCGAGCAGAAAACA  
SRR955403.43269048.2- GTTGAAGAAAACAAGTATGCCGGTGCCTTTATCCCACTGCCTGTGGTCGAGCAGAAAACA  
SRR955403.48102659.2+ GTTGAAGAAAACAAGTATGCCGGTGCCTTTATCCCACTGCCTGTGGTCGAGCAGAAAACA  
SRR955403.54489646.2+ GTTGAAGAAAACAAGTATGCCGGTGCCTTTATCCCACTGCCTGTGGTCGAGCAGAAAACA  
SRR955403.74943617.2- GTTGAAGAAAACAAGTATGCCGGTGCCTTTATCCCACTGCCTGTGGTCGAGCAGAAAACA  
SRR955403.92666487.2- GTTGAAGAAAACAAGTATGCCGGTGCCTTTATCCCACTGCCTGTGGTCGAGCAGAAAACA  
SRR955403.93811490.1- GTTGAAGAAAACAAGTATGCCGGTGCCTTTATCCCACTGCCTGTGGTCGAGCAGAAAACA  
SRR955404.10640934.1- GTTGAAGAAAACAAGTATGCCGGTGCCTTTATCCCACTGCCTGTGGTCGAGCAGAAAACA  
SRR955404.20012032.1- GTTGAAGAAAACAAGTATGCCGGTGCCTTTATCCCACTGCCTGTGGTCGAGCAGAAAACA  
SRR955404.21667925.2- GTTGAAGAAAACAAGTATGCCGGTGCCTTTATCCCACTGCCTGTGGTCGAGCAGAAAACA  
SRR955404.26773079.1- GTTGAAGAAAACAAGTATGCCGGTGCCTTTATCCCACTGCCTGTGGTCGAGCAGAAAACA  
SRR955404.27558151.2- GTTGAAGAAAACAAGTATGCCGGTGCCTTTATCCCACTGCCTGTGGTCGAGCAGAAAACA  
SRR955404.32490642.1+ GTTGAAGAAAACAAGTATGCCGGTGCCTTTATCCCACTGCCTGTGGTCGAGCAGAAAACA  
SRR955404.34527715.1+ GTTGAAGAAAACAAGTATGCCGGTGCCTTTATCCCACTGCCTGTGGTCGAGCAGAAAACA  
SRR955404.3517446.1- GTTGAAGAAAACAAGTAGGCCGGTGCCTTTATCCCACTGCCTGTGGTCGAGCAGAAAACA  
SRR955404.40600314.1- GTTGAAGAAAACAAGTATGCCGGTGCCTTTATCCCACTGCCTGTGGTCGAGCAGAAAACA  
SRR955404.43181078.1- GTTGAAGAAAACAAGTATGCCGGTGCCTTTATCCCACTGCCTGTGGTCGAGCAGAAAACA  
SRR955404.49301553.1- GTTGAAGAAAACAAGTATGCCGGTGCCTTTATCCCACTGCCTGTGGTCGAGCAGAAAACA  
SRR955404.52396791.1- GTTGAAGAAAACAAGTATGCCGGTGCCTTTATCCCACTGCCTGTGGTCGAGCAGAAAACA  
SRR955404.6929864.1+ GTTGAAGAAAACAAGTATGCCGGTGCCTTTATCCCACTGCCTGTGGTCGAGCAGAAAACA  
SRR955404.81836800.1- GTTGAAGAAAACAAGTATGCCGGTGCCTTTATCCCACTGCCTGTGGTCGAGCAGAAAACA  
SRR955404.8824301.1- GTTGAAGAAAACAAGTATGCCGGTGCCTTTATCCCACTGCCTGTGGTCGAGCAGAAAACA  
SRR955405.12019009.2- GTTGAAGAAAACAAGTATGCCGGTGCCTTTATCCCACTGCCTGTGGTCGAGCAGAAAACA  
SRR955405.17028899.1- GTTGAAGAAAACAAGTATGCCGGTGCCTTTATCCCACTGCCTGTGGTCGAGCAGAAAACA  
SRR955405.18081326.1+ GTTGAAGAAAACAAGTATGCCGGTGCCTTTATCCCACTGCCTGTGGTCGAGCAGAAAACA  
SRR955405.1899247.2- GTTGAAGAAAACAAGTAGGCCGGTGCCTTTATCCCACTGCCTGTGGTCGAGCAGAAAACA  
SRR955405.31368143.1- GTTGAAGAAAACAAGTATGCCGGTGCCTTTATCCCACTGCCTGTGGTCGAGCAGAAAACA  
SRR955405.40333455.2+ GTTGAAGAAAACAAGTATGCCGGTGCCTTTATCCCACTGCCTGTGGTCGAGCAGAAAACA  
SRR955405.59475718.1+ GTTGAAGAAAACAAGTATGCCGGTGCCTTTATCCCACTGCCTGTGGTCGAGCAGAAAACA  
SRR955405.7466411.1- GTTGAAGAAAACAAGTATGCCGGTGCCTTTATCCCACTGCCTGTGGTCGAGCAGAAAACA  
SRR955405.74881191.1- GTTGAAGAAAACAAGTATGCCGGTGCCTTTATCCCACTGCCTGTGGTCGAGCAGAAAACA  
SRR955405.75901177.2+ GTTGAAGAAAACAAGTATGCCGGTGCCTTTATCCCACTGCCTGTGGTCGAGCAGAAAACA  
SRR955403.21685211.1- GAAAAACAAGTATGCCGGTGCCTTTATCCCACTGCCTGTGGTCGAGCAGAAAACA  
SRR955403.87209781.2- CAAGTATGCCGGTGCCTTTATCCCACTGCCTGTGGTCGAGCAGAAAACA  
SRR955405.35312982.2+ CAAGTATGCCGGTGCCTTTATCCCACTGCCTGTGGTCGAGCAGAAAACA  
SRR955404.46010507.1+ TATGCCGGTGCCTTTATCCCACTGCCTGTGGTCGAGCAGAAAACA  
SRR955405.37881069.2+ TATGCCGGTGCCTTTATCCCACTGCCTGTGGTCGAGCAGAAAACA  
SRR955405.44936739.1- TGCCGGTGCCTTTATCCCACTGCCTGTGGTCGAGCAGAAAACA  
SRR955403.8583252.1+ GCCGGTGCCTTTATCCCACTGCCTGTGGTCGAGCAGAAAACA  
SRR955404.62566799.1- GCCGGTGCCTTTATCCCACTGCCTGTGGTCGAGCAGAAAACA  
SRR955405.11856992.2+ CGGTGCCTTTATCCCACTGCCTGTGGTCGAGCAGAAAACA  
SRR955405.65844503.2+ CCGTGCCTTTATCCCACTGCCTGTGGTCGAGCAGAAAACA  
SRR955405.35474003.2- GGTGCCTTTATCCCACTGCCTGTGGTCGAGCAGAAAACA  
SRR955403.31834296.2- GTGCCTTTATCCCACTGCCTGTGGTCGAGCAGAAAACA  
SRR955404.27692177.1- GCCTTTATCCCACTGCCTGTGGTCGAGCAGAAAACA  
SRR955403.53065993.1+ CCTTTATCCCACTGCCTGTGGTCGAGCAGAAAACA  
SRR955404.10996986.1+ CCTTTATCCCACTGCCTGTGGTCGAGCAGAAAACA  
SRR955403.53504813.2+ TTTATCCCACTGCCTGTGGTCGAGCAGAAAACA  
SRR955404.76405909.2- TATCCCACTGCCTGTGGTCGAGCAGAAAACA  
SRR955404.8635954.2- TCCCACTGCCTGTGGTCGAGCAGAAAACA  
SRR955403.47362371.1+ CCACTGCCTGTGGTCGAGCAGAAAACA  
SRR955404.6799976.2- CTGTGGTCGAGCAGAAAACA  
SRR955403.39527254.1- TGTGGTCGAGCAGAAAACA  
SRR955404.33923875.2+ GGTCGAGCAGAAAACA  
SRR955403.61722740.1- TCGAGCAGAAAACA  
SRR955404.4284993.2- CGAGCAGAAAACA  
SRR955405.47522187.2+ AGAAAACA  
SRR955405.64496342.1+ AGAAAACA  
SRR955404.14677905.2+ ACA  
SRR955404.52780057.2+ ACA  
SRR955403.39059575.1- CA  
SRR955403.59648782.2+ A  
SRR955405.25863746.1+ A

consensus

GTTGAAGAAAACAAGTATGCCGGTGCCTTTATCCCACTGCCTGTGGTCGAGCAGAAAACA

SRR955404.6929864.1+ C  
SRR955403.74943617.2- CC  
SRR955404.32490642.1+ CC  
SRR955404.34527715.1+ CC  
SRR955405.18081326.1+ CC  
SRR955403.48102659.2+ CCG  
SRR955404.27558151.2- CCGTATCTACAAGg  
SRR955403.105372963.2- CCGTATCTACAAGgt  
SRR955404.26773079.1- CCGTATCTACAAGgt  
SRR955404.21667925.2- CCGTATCTACAAGgtaaacttgcag  
SRR955405.12019009.2- CCGTATCTACAAGgtaaacttgcag  
SRR955405.40333455.2+ CCGTATCTACAAGgtaaacttgcagg  
SRR955403.18781244.2- CCGTATCTACAAGgtaaacttgcaggct  
SRR955404.52396791.1- CCGTATCTACAAGgtaaacttgcaggct  
SRR955404.8824301.1- CCGTATCTACAAGgtaaacttgcaggct

SRR955405.17028899.1- CCGTATCTACAAGgtaaacttgcaggct  
SRR955405.1899247.2- CCGTATCTACAAGgtaaacttgcaggct  
SRR955405.31368143.1- CCGTATCTACAAGgtaaacttgcaggct  
SRR955405.7466411.1- CCGTATCTACAAGgtaaacttgcaggct  
SRR955405.74881191.1- CCGTATCTACAAGgtaaacttgcaggct  
SRR955403.54489646.2+ CCGTATCTACAAGgtaaacttgcaggctgta  
SRR955404.81836800.1- CCGTATCTACAAGgtaaacttgcaggctgtatta  
SRR955405.59475718.1- CCGTATCTACAAGgtaaacttgcaggctgtatta  
SRR955403.43269048.2- CCGTATCTACAAGgtaaacttgcaggctgtattact  
SRR955403.93811490.1- CCGTATCTACAAGgtaaacttgcaggctgtattact  
SRR955404.10640934.1- CCGTATCTACAAGgtaaacttgcaggctgtattact  
SRR955404.20012032.1- CCGTATCTACAAGgtaaacttgcaggctgtattact  
SRR955404.3517446.1- CCGTATCTACAAGgtaaacttgcaggctgtattact  
SRR955404.40600314.1- CCGTATCTACAAGgtaaacttgcaggctgtattact  
SRR955404.43181078.1- CCGTATCTACAAGgtaaacttgcaggctgtattact  
SRR955404.49301553.1- CCGTATCTACAAGgtaaacttgcaggctgtattact  
SRR955405.75901177.2+ CCGTATCTACAAGgtaaacttgcaggctgtattactg  
SRR955403.92666487.2- CCGTATCTACAAGgtaaacttgcaggctgtattactggg  
SRR955403.21685211.1- CCGTATCTACAAGgtaaacttgcaggctgtattactgggggaaaaa  
SRR955403.87209781.2- CCGTATCTACAAGgtaaacttgcaggctgtattactgggggaaaaaacagga  
SRR955405.35312982.2+ CCGTATCTACAAGgtaaacttgcaggctgtattactgggggaaaaaacagga  
SRR955405.65844503.2+ CCGTATCTACAAGgtaaacttgcaggctgtattactgggggaaaaaacagga  
SRR955404.46010507.1+ CCGTATCTACAAGgtaaacttgcaggctgtattactgggggcaaaacaggacagg  
SRR955405.11856992.2+ CCGTATCTACAAGgtaaacttgcaggctgtattactgggggcaaaacaggacagg  
SRR955405.37881069.2+ CCGTATCTACAAGgtaaacttgcaggctgtattactgggggcaaaacaggacagg  
SRR955405.44936739.1- CCGTATCTACAAGgtaaacttgcaggctgtattactgggggcaaaacaggacaggag  
SRR955403.8583252.1+ CCGTATCTACAAGgtaaacttgcaggctgtattactgggggcaaaacaggacaggagt  
SRR955404.62566799.1- CCGTATCTACAAGgtaaacttgcaggctgtattactgggggcaaaacaggacaggagt  
SRR955403.31834296.2- CCGTATCTACAAGgtaaacttgcaggctgtattactgggggcaaaacaggacaggagtct  
SRR955403.39059575.1- CCGTATCTACAAGgtaaacttgcaggctgtattactgggggcaaaacaggacaggagtct  
SRR955403.39527254.1- CCGTATCTACAAGgtaaacttgcaggctgtattactgggggcaaaacaggacaggagtct  
SRR955403.47362371.1+ CCGTATCTACAAGgtaaacttgcaggctgtattactgggggcaaaacaggacaggagtct  
SRR955403.53065993.1+ CCGTATCTACAAGgtaaacttgcaggctgtattactgggggcaaaacaggacaggagtct  
SRR955403.53504813.2+ CCGTATCTACAAGgtaaacttgcaggctgtattactgggggcaaaacaggacaggagtct  
SRR955403.59648782.2+ CCGTATCTACAAGgtaaacttgcaggctgtattactgggggcaaaacaggacaggagtct  
SRR955403.61722740.1- CCGTATCTACAAGgtaaacttgcaggctgtattactgggggcaaaacaggacaggagtct  
SRR955404.10996986.1+ CCGTATCTACAAGgtaaacttgcaggctgtattactgggggcaaaacaggacaggagtcc  
SRR955404.14677905.2+ CCGTATCTACAAGgtaaacttgcaggctgtattactgggggcaaaacaggacaggagtct  
SRR955404.27692177.1- CCGTATCTACAAGgtaaacttgcaggctgtattactgggggcaaaacaggacaggagtct  
SRR955404.33923875.2+ CCGTATCTACAAGgtaaacttgcaggctgtattactgggggcaaaacaggacaggagtct  
SRR955404.4284993.2- CCGTATCTACAAGgtaaacttgcaggctgtattactgggggcaaaacaggacaggagtct  
SRR955404.52780057.2+ CCGTATCTACAAGgtaaacttgcaggctgtattactgggggcaaaacaggacaggagtct  
SRR955404.6799976.2- CCGTATCTACAAGgtaaacttgcaggctgtattactgggggcaaaacaggacaggagtct  
SRR955404.76405909.2- CCGTATCTACAAGgtaaacttgcaggctgtattactgggggcaaaacaggacaggagtct  
SRR955404.8635954.2- CCGTATCTACAAGgtaaacttgcaggctgtattactgggggcaaaacaggacaggagtct  
SRR955405.12381906.1- CCGTATCTACAAGgtaaacttgcaggctgtattactgggggcaaaacaggacaggagtct  
SRR955405.25863746.1+ CCGTATCTACAAGgtaaacttgcaggctgtattactgggggcaaaacaggacaggagtct  
SRR955405.35474003.2- CCGTATCTACAAGgtaaacttgcaggctgtattactgggggcaaaacaggacaggagtct  
SRR955405.47522187.2+ CCGTATCTACAAGgtaaacttgcaggctgtattactgggggcaaaacaggacaggagtct  
SRR955405.64496342.1+ CCGTATCTACAAGgtaaacttgcaggctgtattactgggggcaaaacaggacaggagtct  
SRR955404.41810506.2+ GTATCTACAAGgtaaacttgcaggctgtattactgggggcaaaacaggacaggagtct  
SRR955403.58740753.2- TACAAGgtaaacttgcaggctgtattactgggggcaaaacaggacaggagtct  
SRR955404.84628401.1+ AAGgtaaacttgcaggctgtattactgggggcaaaacaggacaggagtct  
SRR955403.14283255.1- AGgtaaacttgcaggctgtattactgggggcaaaacaggacaggagtct  
SRR955404.34992271.1- AGgtaaacttgcaggctgtattactgggggcaaaacaggacaggagtct  
SRR955405.14570796.1+ Ggtaaacttgcaggctgtattactgggggcaaaacaggacaggagtct

consensus

CCGTATCTACAAGgtaaacttgcaggctgtattactgggggaaaaaacaggacaggagtct

---

## R. Great cormorant (No. 34), exon 4, WGS data

- CAP3 alignment of WGS data spanning exon 4 (uppercase letters)

```

      .   :   .   :   .   :   .   :   .   :
SRR959560.90250972.1+   gaccttcaggtgccttgtgtgtgtctttttT
SRR959561.40149424.2-   gaccttcaggtgccttgtgtgtgtctttttTC
SRR959561.68727661.2-   gaccttcaggtgccttgtgtgtgtctttttTC
SRR959560.42879338.1+   gaccttcaggtgccttgtgtgtgtctttttTCCAGTTG
SRR959560.96444595.2-   gaccttcaggtgccttgtgtgtgtctttttTCCAGTTG
SRR959561.15995664.2+   gaccttcaggtgccttgtgtgtgtctttttTCCAGTTGA
SRR959561.8135332.2+   gaccttcaggtgccttgtgtgtgtctttttTCCAGTTGAAGAA
SRR959561.5891527.2-   gaccttcaggtgccttgtgtgtgtctttttTCCAGTTGAAGAAA
SRR959561.14265058.2+   gaccttcaggtgccttgtgtgtgtctttttTCCAGTTGAAGAAAACC
SRR959560.32821229.2-   gaccttcaggtgccttgtgtgtgtctttttTCCAGTTGAAGAAAACCAA
SRR959561.83604022.1+   gaccttcaggtgccttgtgtgtgtctttttTCCAGTTGAAGAAAACCAA
SRR959561.72524179.1+   gaccttcaggtgccttgtgtgtgtctttttTCCAGTTGAAGAAAACCAAGTGT
SRR959561.7528594.1-   gaccttcaggtgccttgtgtgtgtctttttTCCAGTTGAAGAAAACCAAGTGT
SRR959560.88560863.2-   gaccttcaggtgccttgtgtgtgtctttttTCCAGTTGAAGAAAACCAAGTGTGCC
SRR959560.104143937.2-   gaccttcaggtgccttgtgtgtgtctttttTCCAGTTGAAGAAAACCAAGTGTGCCTGTAC
SRR959561.104246699.2-   gaccttcaggtgccttgtgtgtgtctttttTCCAGTTGAAGAAAACCAAGTGTGCCTGTAC
SRR959560.25382432.1+   gaccttcaggtgccttgtgtgtgtctttttTCCAGTTGAAGAAAACCAAGTGTGCCCGTAC
SRR959560.33001725.1-   gaccttcaggtgccttgtgtgtgtctttttTCCAGTTGAAGAAAACCAAGTGTGCCTGTAC
SRR959560.3935177.2+   gaccttcaggtgccttgtgtgtgtctttttTCCAGTTGAAGAAAACCAAGTGTGCCTGTAC
SRR959561.17237439.2+   gaccttcaggtgccttgtgtgtgtctttttTCCAGTTGAAGAAAACCAAGTGTGCCTGTAC
SRR959561.30522868.1-   gaccttcaggtgccttgtgtgtgtctttttTCCAGTTGAAGAAAACCAAGTGTGCCTGTAC
SRR959561.59165143.1+   gaccttcaggtgccttgtgtgtgtctttttTCCAGTTGAAGAAAACCAAGTGTGCCTGTAC
SRR959561.60700224.1+   gaccttcaggtgccttgtgtgtgtctttttTCCAGTTGAAGAAAACCAAGTGTGCCTGTAC
SRR959561.71846962.1+   gaccttcaggtgccttgtgtgtgtctttttTCCAGTTGAAGAAAACCAAGTGTGCCTGTAC
SRR959561.78830570.1-   gaccttcaggtgccttgtgtgtgtctttttTCCAGTTGAAGAAAACCAAGTGTGCCTGTAC
SRR959561.44204103.1-   ccttcaggtgccttgtgtgtgtctttttTCCAGTTGAAGAAAACCAAGTGTGCCTGTAC
SRR959561.55982612.2-   tcaggtcccttgtgtgtgtctttttTCCAGTTGAAGAAAACCAAGTGTGCATGTAC
SRR959561.70848310.1-   aggtgccttgtgtgtgtctttttTCCAGTTGAAGAAAACCAAGTGTGCCTGTAC
SRR959561.35272313.2-   tgtgtgtctttttTCCAGTTGAAGAAAACCAAGTGTGCCTGTAC
SRR959560.68775550.2-   tgtgtctttttTCCAGTTGAAGAAAACCAAGTGTGCCTATAC
SRR959561.30809903.2-   tctttttTCCAGTTGAAGAAAACCAAGTGTGCCTGTAC
SRR959561.44823163.2+   ctttttTCCAGTTGAAGAAAACCAAGTGTGCCTGTAC
SRR959561.13074295.2-   tTCCAGTTGAAGAAAACCAAGTGTGCCTGTAC
SRR959560.99357060.1+   CAGTTGAAGAAAACCAAGTGTGCCTGTAC
SRR959561.69030711.2+   GAAACCAAGTGTGCCTGTAC
SRR959561.83762742.2-   GAAACCAAGTGTGCCTGTAC
SRR959561.17174244.2-   AACCAAGTGTGCCTGTAC
SRR959561.59801143.2-   AACCAAGTGTGCCTGTAC
SRR959561.6859783.1+   TGTC
SRR959561.71523271.1+   TGTC
SRR959561.82583502.1+   GTAC
SRR959561.12787236.2-   TAC

```

consensus

```
gaccttcaggtgccttgtgtgtgtctttttTCCAGTTGAAGAAAACCAAGTGTGCCTGTAC
```

```

      .   :   .   :   .   :   .   :   .   :
SRR959561.30522868.1-   C
SRR959561.71846962.1+   CTTTATT
SRR959560.104246699.2-   CTTTATTCCA
SRR959561.78830570.1-   CTTTATTCCACT
SRR959561.60700224.1+   CTTTATTCCACTGCCAAGCAGAGAGA
SRR959560.33001725.1-   CTTTATTCCACTGCCAAGCAGAGAC
SRR959561.17237439.2+   CTTTATTCCACTGCCAAGCAGAGACAC
SRR959561.59165143.1+   CTTTATTCCACTGCCAAGCAGAGACACC
SRR959560.104143937.2-   CTTTATTCCACTGCCAAGCAGAGACACCACGTC
SRR959561.55982612.2-   CTTTATTCCCTGCCAAGCAGAGACACCACGCTACA
SRR959560.25382432.1+   CTTTATTCCACTGCCAAGCAGAGACACCACGCTACAAGg
SRR959561.44204103.1-   CTTTATTCCACTGCCAAGCAGAGACACCACGCTACAAGg
SRR959561.70848310.1-   CTTTATTCCACTGCCAAGCAGAGACACCACGCTACAAGgtaaactt
SRR959561.35272313.2-   CTTTATTCCACTGCCAAGCAGAGACACCACGCTACAAGgtaaacttgcaggctgta
SRR959560.68775550.2-   CTTTATTCCACTGCCAAGCAGAGACACCACGCTACAAGgtaaacttgcaggctgtagg
SRR959560.99357060.1+   CTTTATTCCACTGCCAAGCAGAGACACCACGCTACAAGgtaaacttgcaggctgtagga
SRR959561.12787236.2-   CTTTATTCCACTGCCAAGCAGAGACACCACGCTACAAGgtaaacttgcaggctgtagga
SRR959561.13074295.2-   CTTTATTCCACTGCCAAGCAGAGACACCACGCTACAAGgtaaacttgcaggctgtagga
SRR959561.17174244.2-   CTTTATTCCACTGCCAAGCAGAGACACCACGCTACAAGgtaaacttgcaggctgtagga
SRR959561.30809903.2-   CTTTATTCCACTGCCAAGCAGAGACACCACGCTACAAGgtaaacttgcaggctgtagga
SRR959561.44823163.2+   CTTTATTCCACTGCCAAGCAGAGACACCACGCTACAAGgtaaacttgcaggctgtagga
SRR959561.59801143.2-   CTTTATTCCACTGCCAAGCAGAGACTCCACGCTACAAGgtaaacttgcaggctgtagga
SRR959561.6859783.1+   CTTTATTCCACTGCCAAGCAGAGACACCACGCTACAAGgtaaacttgcaggctgtagga
SRR959561.69030711.2+   CTTTATTCCACTGCCAAGCAGAGACACCACGCTACAAGgtaaacttgcaggctgtagga
SRR959561.71523271.1+   CTTTATTCCACTGCCAAGCAGAGACACCACGCTACAAGgtaaacttgcaggctgtagga
SRR959561.82583502.1+   CTTTATTCCACTGCCAAGCAGAGACACCACGCTACAAGgtaaacttgcaggctgtagga
SRR959561.83762742.2-   CTTTATTCCACTGCCAAGCAGAGACACCACGCTACAAGgtaaacttgcaggctgtagga
SRR959560.100142373.1-   TTCCACTGCCAAGCAGAGACACCACGCTACAAGgtaaacttgcaggctgtagga
SRR959561.60535851.2+   GCCAAGCAGAGACACCACGCTACAAGgtaaacttgcaggctgtagga

```

SRR959560.27242127.2- CAAGCAGAGACACCACGTCTACAAGgtaaacttgcaggctgtagga  
SRR959560.78888320.2+ CACCACGTCTACAAGgtaaacttgcaggctgtagga  
SRR959561.21849351.1+ CACCACGTCTACAAGgtaaacttgcaggctgtagga  
SRR959560.10398746.1- AAGgtaaacttgcaggctgtagga  
SRR959561.2716527.1+ Gtaaacttgcaggctgtagga

consensus

CTTTATTCCACTGCCAAGCAGAGACACCACGTCTACAAGgtaaacttgcaggctgtagga

---





SRR953484.61212684.2- GTGGCATAGACGATTGCTATGGAGCCAAGCCAGATTTTGCCTGTGCTGTCAGGTGCTTG  
SRR953484.716568.2+ GTGGCATAGACGATTGCTATGGAGCCAAGCCAGATTTTGCCTGTGCTGTCAGGTGCTTG  
SRR953484.12255125.2+ GCATAGACGATTGCTATGGAGCCAAGCCAGATTTTGCCTGTGCTGTCAGGTGCTTG  
SRR953484.7565276.1- ATAGACGATTGCTATGGAGCCAAGCCAGATTTTGCCTGTGCTGTCAGGTGCTTG  
SRR953484.43309622.2- ACGATTGCTATGGAGCCAAGCCAGATTTTGCCTGTGCTGTCAGGTGCTTG  
SRR953484.54550992.1- AGATTTGGCCCTGTGCTGTCAGGTGCTTG  
SRR953484.76925770.1+ TTTTGCCTGTGCTGTCAGGTGCTTG  
SRR953484.95361795.1- CTGCTGTCAGGGGCTTG  
SRR953484.20740787.1+ GTGCTGTCAGGTGCTTG  
SRR953484.99666728.1+ TTG

consensus

GTGGCATAGACGATTGCTATGGAGCCAAGCCAGATTTTGCCTGTGCTGTCAGGTGCTTG

. : . : . : . : . : . :  
SRR953484.61212684.2- TGGGCTGA  
SRR953484.22039022.1+ TGGGCTGAGG  
SRR953484.24892395.1+ TGGGCTGAGGG  
SRR953484.25326404.1+ TGGGCTGAGGGACTGGAGGAG  
SRR953484.55616818.1+ TGGGCTGAGGGACTGGAGGCGAGgtg  
SRR953484.11216633.1+ TGGGCTGAGGGACTGGAGGAGAGgtgag  
SRR953484.716568.2+ TGGGCTGAGGGACTGGAGGAGAGgtgag  
SRR953484.7565276.1- TGGGCTGAGGGACTGGAGGAGAGgtgagctgcagaac  
SRR953484.12255125.2+ TGGGCTGAGGGACTGGAGGAGAGgtgagctgcagaaccatt  
SRR953484.43309622.2- TGGGCTGAGGGACTGGAGGAGAGgtgagctgcagaaccattcccttc  
SRR953484.20740787.1+ TGGGCTGAGGGACTGGAGGAGAGgtgagctgcagaaccctttcccttccccatttcttg  
SRR953484.54550992.1- TGGGCTGAGGGACTGGAGGAGAGgtgagctgcagaaccattcccttccccatttcttg  
SRR953484.76925770.1+ TGGGCTGAGGGACTGGAGGAGAGgtgagctgcagaactcattcccttccccatttcttg  
SRR953484.95361795.1- TGGGCTGAGGGACTGGAGGAGAGgtgagctgcagaaccattcccttccccatttcttg  
SRR953484.99666728.1+ TGGGCTGAGGGACTGGAGGAGAGgtgagctgcagaactcattcccttccccatttcttg  
SRR953484.61172402.1- GACTGGAGGAGAGgtgagctgcagaaccattcccttccccatttcttg  
SRR953484.64526699.2- GACTGGAGGAGAGgtgagctgcagaaccattcccttccccatttcttg  
SRR953484.19714373.2- ACTGGAGGAGAGgtgagctgcagaaccattcccttccccatttcttg  
SRR953484.73162379.2+ GAGAGgtgagctgcagaaccattcccttccccatttcttg

consensus

TGGGCTGAGGGACTGGAGGAGAGgtgagctgcagaaccattcccttccccatttcttg

# T. Bar-tailed trogon (No. 21), exon 5, WGS data

- CAP3 alignment of WGS data spanning exon 5 (uppercase letters)

```
SRR952777.74223757.2- caataactttctctgactctttctcttggtttcagTTCGA
SRR952778.45607761.1- caataactttctctgactctttctcttggtttcagTTCGAACCTGTA
SRR952777.4814668.2- caataactttctctgactctttgtcttggtttcagTTCGAACCTGTACT
SRR952777.61489167.2+ caataactttctctgactctttctcttggtttcagTTCGAAGCTGTACTAACACC
SRR952778.66141715.1+ caataactttctctgactctttctcttggtttcagTTCGAACCTGTACTAACACCCC
SRR952777.10318742.1+ caataactttctctgactctttctcttggtttcagTTCGAACCTGTACTAACACCCCACA
SRR952777.113115601.2+ caataactttctctgactctttctcttggtttcagTTCGAACCTGTACTAACACCCCACA
SRR952777.1457968.2+ caataactttctctgactctttctcttggtttcagTTCGAACCTGTACTAACACCCCACA
SRR952777.21098462.1+ caataactttctctgactctttctcttggtttcagTTCGAACCTGTACTAACACCCCACA
SRR952777.24895342.1+ caataactttctctgactctttctcttggtttcagTTCGAACCTGTACTAACACCCCACA
SRR952777.28307119.1+ caataactttctctgactctttctcttggtttcagTTCGAACCTGTACTAACACCCCACA
SRR952777.30497011.1+ caataactttctctgactctttctcttggtttcagTTCGAACCTGTACTAACACCCCACA
SRR952777.30627853.1- caataactttctctgactctttctcttggtttcagTTCGAACCTGTACTAACACCCCACA
SRR952777.47084385.1- caataactttctctgactctttctcttggtttcagTTCGAACCTGTACTAACACCCCACA
SRR952777.60916061.1+ caataactttctctgactctttctcttggtttcagTTCGAACCTGTACTAACACCCCACA
SRR952778.67888612.2- caataactttctctgactctttctcttggtttcagTTCGAACCTGTACTAACACCCCACA
SRR952777.83112181.1- caataactttctctgactctttctcttggtttcagTTCGAACCTGTACTAACACCCCACA
SRR952777.85488194.1+ caataactttctctgactctttctcttggtttcagTTCGAACCTGTACTAACACCCCACA
SRR952777.93243186.2- caataactttctctgactctttctcttggtttcagTTCGAACCTGTACTAACACCCCACA
SRR952778.11621171.2+ caataactttctctgactctttctcttggtttcagTTCGAACCTGTACTAACACCCCACA
SRR952778.30775244.1- caataactttctctgactctttctcttggtttcagTTCGAACCTGTACTAACACCCCACA
SRR952778.31779816.2+ caataactttctctgactctttctcttggtttcagTTCGAACCTGTACTAACACCCCACA
SRR952778.36886304.2- caataactttctctgactctttctcttggtttcagTTCGAACCTGTACTAACACCCCACA
SRR952778.48112104.1- caataactttctctgactctttctcttggtttcagTTCGAACCTGTACTAACACCCCACA
SRR952778.77469570.1+ caataactttctctgactctttctcttggtttcagTTCGAACCTGTACTAACACCCCACA
SRR952778.82883359.1+ caataactttctctgactctttctcttggtttcagTTCGAACCTGTACTAACACCCCACA
SRR952777.28908522.2+ aataactttctctgactctttctcttggtttcagTTCGAACCTGTACTAACACCCCACA
SRR952778.8546482.2+ aataactttctctgactctttctcttggtttcagTTCGAACCTGTACTAACACCCCACA
SRR952777.83634941.1+ ataactttctctgactctttctcttggtttcagTTCGAACCTGTACTAACACCCCACA
SRR952777.93359160.2+ taactttctctgactctttctcttggtttcagTTCGAACCTGTACTAACACCCCACA
SRR952777.93509890.2+ tttctctgactctttctcttggtttcagTTCGAACCTGTACTAACACCCCACA
SRR952777.27931091.2+ ttctctgactctttctcttggtttcagTTCGAACCTGTACTAACACCCCACA
SRR952778.37452001.1+ gactctttctcttggtttcagTTCGAACCTGTACTAACACCCCACA
SRR952777.23555206.1+ ctctttctcttggtttcagTTCGAACCTGTACTAACACCCCACA
SRR952778.15662083.1- ctctttctcttggtttcagTTCGAACCTGTACTAACACCCCACA
SRR952777.93624234.1+ tctttctcttggtttcagTTCGAACCTGTACTAACACCCCACA
SRR952778.22960022.1- tcttggtttcagTTCGAACCTGTACTAACACCCCACA
SRR952777.60429857.1- ttggtttcagTTCGAACCTGTACTAACACCCCACA
SRR952778.33893944.1- tcagTTCGAACCTGTACTAACACCCCACA
SRR952777.2496180.1+ cagTTCGAACCTGTACTAACACCCCACA
SRR952777.12672881.2- CGAACCTGTACTAACACCCCACA
SRR952778.62759729.1- AACCTGTACTAACACCCCACA
SRR952777.2168053.2- CTGTACTAACACCCCACA
SRR952778.21008811.1+ CTGTACTAACACCCCACA
SRR952778.38439500.2- CTGTACTAACACCCCACA
SRR952777.7410444.2+ GTACTAACACCCCACA
SRR952778.67977382.1- ACTAACACCCCACA
SRR952778.59682180.1+ AACACCCCACA
SRR952778.5960998.1+ ACACCCCACA
SRR952777.50947988.1+ CACCCCACA
SRR952778.74260928.1- ACCCCACA
SRR952777.16671753.2- A
```

consensus

caataactttctctgactctttctcttggtttcagTTCGAACCTGTACTAACACCCCACA

```
SRR952777.10318742.1+ ACA
SRR952777.21098462.1+ ACA
SRR952777.24895342.1+ ACAT
SRR952778.31779816.2+ ACAT
SRR952777.30627853.1- ACATCACC
SRR952777.47084385.1- ACATCACC
SRR952778.82883359.1+ ACATCACCTTGGTTC
SRR952778.30775244.1- ACATCACCTTGGTTCATCAC
SRR952777.28307119.1+ ACATCACATTTGGTTCATCAC
SRR952777.60916061.1+ ACATCACCTTGGTTCATCAC
SRR952778.11621171.2+ ACATCACCTTGGTTCATCAC
SRR952778.48112104.1- ACATCACCTTGGTTCATCACATTCT
SRR952777.93243186.2- ACATCACCTTGGTTCATCACATTCTTGTTT
SRR952777.83112181.1- ACATCACCTTGGTTCATCACATTCTTGTTTATGCCT
SRR952777.85488194.1+ ACATCACCTTGGTTCATCACATTCTTGTTTATGCCTG
SRR952778.77469570.1+ ACATCACCTTGGTTCATCACATTCTTGTTTATGCCTG
SRR952777.113115601.2+ ACATCACCTTGGTTCATCACATTCTTGTTTATGCCTGCG
SRR952778.36886304.2- ACATCACCTTGGTTCATCACATTCTTGTTTATGCCTGCG
SRR952777.1457968.2+ ACATCACCTTGGTTCATCACATTCTTGTTTATGCCTGCGG
```

SRR952777.30497011.1+ ACATCACCTTGGTTCATCACATTCTGTTTATGCCTGCGG  
SRR952777.28908522.2+ ACATCACCTTGGTTCATCACATTCTGTTTATGCCTGCGGC  
SRR952777.8546482.2+ ACATCACCTTGGTTCATCACATTCTGTTTATGACTGCGGC  
SRR952777.83634941.1+ ACATCACCTTGGTTCATCACATTCTGTTTATGCCTGCGGCA  
SRR952777.93359160.2+ ACATCACCTTGGTTCATCACATTCTGTTTATGCCTGCGGCAG  
SRR952777.93509890.2+ ACATCACCTTGGTTCATCACATTCTGTTTATGCCTGCGGCAG  
SRR952777.23555206.1+ ACATCACCTTGGTTCATCACATTCTGTTTATGCCTGCGGCAGCT  
SRR952777.37452001.1+ ACATCACCTTGGTTCATCACATTCTGTTTATGCCTGCGGCAGCTCT  
SRR952777.27931091.2+ ACATCACCTTGGTTCATCACATTCTGTTTATGCCTGCGGCAGCTCTG  
SRR952777.93624234.1+ ACATCACCTTGGTTCATCACATTCTGTTTATGCCTGCGGCAGCTCTGG  
SRR952777.2496180.1+ ACATCACCTTGGTTCATCACATTCTGTTTATGCCTGCGGCAGGGCTGGCGTG  
SRR952777.15662083.1- ACATCACCTTGGTTCATCACATTCTGTTTATGCCTGCGGCAGCTCTGGCGTGTG  
SRR952777.12672881.2- ACATCACCTTGGTTCATCACATTCTGTTTATGCCTGCGGCAGCTCTGGCGTGTGCCCCA  
SRR952777.16671753.2- ACATCTCCTTGGTTCATCACATTCTGTTTATGCCTGCGGCAGCTCTGGCGTGTGCCCCA  
SRR952777.2168053.2- ACATCACCTTGGTTCATCACATTCTGTTTATGCCTGCGGCAGCTCTGGCGTGTGCCCCA  
SRR952777.50947988.1+ ACATCACCTTGGTTCATCACATTCTGTTTATGCCTGCGGCAGCTCTGGCGTGTGCCCCA  
SRR952777.60429857.1- ACATCACCTTGGTTCATCACATTCTGTTTATGCCTGCGGCAGCTCTGGCGTGTGCCCCA  
SRR952777.7410444.2+ ACATCACCTTGGTTCATCACATTCTGTTTATGCCTGCGGCAGCTCTGGCGTGTGCCCCC  
SRR952777.21008811.1+ ACATCACCTTGGTTCATCACATTCTGTTTATGCCTGCGGCAGCTCTGGCGTGTGCCCCA  
SRR952777.22960022.1- ACATCACCTTGGTTCATCACATTCTGTTTATGCCTGCGGCAGCTCTGGCGTGTGCCCCA  
SRR952777.33893944.1- ACATCACCTTGGTTCATCACATTCTGTTTATGCCTGCGGCAGCTCTGGCGTGTGCCCCA  
SRR952777.38439500.2- ACATCACCTTGGTTCATCACATTCTGTTTATGCCTGCGGCAGCTCTGGCGTGTGCCCCA  
SRR952777.5960998.1+ ACATCACCTTGGTTCATCACATTCTGTTTATGCCTGCGGCAGCTCTGGCGTGTGCCCCA  
SRR952777.59682180.1+ ACATCACCTTGGTTCATCACATTCTGTTTATGCCTGCGGCAGCTCTGGCGTGTGCCCCA  
SRR952777.62759729.1- ACATCACCTTGGTTCATCACATTCTGTTTATGCCTGCGGCAGCTCTGGCGTGTGCCCCA  
SRR952777.67977382.1- ACATCACCTTGGTTCATCACATTCTGTTTATGCCTGCGGCAGCTCTGGCGTGTGCCCCA  
SRR952777.74260928.1- ACATCACCTTGGTTCATCACATTCTGTTTATGCCTGCGGCAGCTCTGGCGTGTGCCCCA  
SRR952777.73164985.1+ GTTTCATCACATTCTGTTTATGCCTGCGGCAGCTCTGGCGTGTGCCCCA  
SRR952777.10783276.1+ CACATTCTGTTTATGCCTGCGGCAGCTCTGGCGTGTGCCCCA  
SRR952777.67292835.2+ GTTTCATCACATTCTGTTTATGCCTGCGGCAGCTCTGGCGTGTGCCCCA  
SRR952777.11786317.1- TATGCCTGCTGCCGCTCTGGCGTGTGCCCCA  
SRR952777.30117750.1+ TATGCCTGCGGCAGCTCTGGCGGTTGCCCCA  
SRR952777.38155861.2+ TATGCCTGCGGCAGCTCTGGCGTGTGCCCCA  
SRR952777.74642814.1+ TATGCCTGCGGCAGCTCTGGCGTGTGCCCCA  
SRR952777.18375199.2- GCGGCAGCTCTGGCGTGTGCCCCA  
SRR952777.112177493.1- CAGCTCTGGCGTGTGCCCCA  
SRR952777.80070047.2- CAGCTCTGGCGGTTGCCCCA  
SRR952777.56874871.2+ TCTGGCGGTTGCCCCA  
SRR952777.68296271.2+ TCTGGCGTGTGCCCCA  
SRR952777.7079840.2- CTGGCGTGTGCCCCA

consensus

ACATCACCTTGGTTCATCACATTCTGTTTATGCCTGCGGCAGCTCTGGCGTGTGCCCCA

SRR952777.22960022.1- GTG  
SRR952777.60429857.1- GTGGC  
SRR952777.33893944.1- GTGGCACAGAT  
SRR952777.12672881.2- GTGGCACAGATGATTGC  
SRR952777.62759729.1- GTGGCACAGATGATTGCTA  
SRR952777.2168053.2- GTGGCACAGATGATTGCTATGG  
SRR952777.7410444.2+ GTGGCACAGATGATTGCTATGG  
SRR952777.21008811.1+ GGGCACAGATGATTGCTATGG  
SRR952777.38439500.2- GTGGCACAGATGATTGCTATGG  
SRR952777.67977382.1- GTGGCACAGATGATTGCTATGGAGCC  
SRR952777.5960998.1+ GTGGCACAGATGATTGCTATGGAGCCAAC  
SRR952777.59682180.1+ GTGGCACAGATGATTGCTATGGAGCCAAC  
SRR952777.50947988.1+ GTGGCACAGATGATTGCTATGGGGCCAACCTC  
SRR952777.74260928.1- GTGGCACAGATGATTGCTATGGAGCCAACCTCA  
SRR952777.16671753.2- GTGGCACAGATGATTGCTATGGAGCCAACCTCAGATTTTA  
SRR952777.73164985.1+ GTGGCACAGATGATTGCTTGGAGCCAACCTCAGATTTTTCCCTCCGATTAG  
SRR952777.10783276.1+ GTGGCACAGATGATTGCTATGGAGCCAACCTCAGATTTTACCCTCAGATTAGTGCTCTC  
SRR952777.112177493.1- GTGGCACAGATGATTGCTATGGAGCCAACCTCAGATTTTACCCTCAGATTAGTGCTCTCAG  
SRR952777.11786317.1- GTGGCACAGATGATTGCTATGGAGCCAACCTCAGATTTTACCCTCAGATTAGTGCTCTCAG  
SRR952777.56874871.2+ GTGGCACAGATGATTGCTATGGAGCCAACCTCAGATTTTACCCTCAGATTAGTGCTCTCAG  
SRR952777.67292835.2+ GTGGCACAGATGATTGCTATGGAGCCAACCTCAGATTTTACCCTCAGATTAGTGCTCTCCG  
SRR952777.68296271.2+ GTGGCACAGATGATTGCTATGGAGCCAACCTCAGATTTTACCCTCAGATTAGTGCTCTCAG  
SRR952777.7079840.2- GTGGCACAGATGATTGCTATGGAGCCAACCTCAGATTTTACCCTCAGATTAGTGCTCTCAG  
SRR952777.18375199.2- GTGGCACAGATGATTGCTATGGAGCCAACCTCAGATTTTACCCTCAGATTAGTGCTCTCAG  
SRR952777.30117750.1+ GTGGCACAGATGATTGCTATGGAGCCAACCTCAGATTTTACCCTCAGATTAGTGCTCTCAG  
SRR952777.38155861.2+ GTGGCACAGATGATTGCTATGGAGCCAACCTCAGATTTTACCCTCAGATTAGTGCTCTCCG  
SRR952777.74642814.1+ GTGGCACAGATGATTGCTATGGAGCCAACCTCAGATTTTACCCTCAGATTAGTGCTCTCAG  
SRR952777.80070047.2- GTGGCACAGATGATTGCTATGGAGCCAACCTCAGATTTTACCCTCAGATTAGTGCTCTCAG  
SRR952777.24575501.1+ ACAGATGATTGCTATGGAGCCAACCTCAGATTTTACCCTCAGATTAGTGCTCTCAG  
SRR952777.89897686.1+ CAGATGATTGCTATGGAGCCAACCTCAGATTTTACCCTCAGATTAGTGCTCTCAG  
SRR952777.53826315.1- ATGATTGCTATGGAGCCAACCTCAGATTTTACCCTCAGATTAGTGCTCTCAG  
SRR952777.13472182.2+ ATGATTGCTATGGAGCCAACCTCAGATTTTACCCTCAGATTAGTGCTCTCAG  
SRR952777.43025515.1- CTATGGAGCCAACCTCAGATTTTACCCTCAGATTAGTGCTCTCAG  
SRR952777.29943706.1+ GCCAACCTCAGATTTTACCCTCAGATTAGTGCTCTCAG  
SRR952777.18016292.1+ TCAGATTTTACCCTCAGATTAGTGCTCTCAG  
SRR952777.84254921.1- CAGATTTTACCCTCAGATTAGTGCTCTCAG  
SRR952777.71588172.1- ATTTTACCCTCAGATTAGTGCTCTCAG  
SRR952777.107530151.1- ACCCTCAGATTAGTGCTCTCAG  
SRR952777.94376434.2- ACCCTCAGATTAGTGCTCTCAG  
SRR952777.8146226.2+ ACCCTCAGATTAGTGCTCTCAG



## U. Rhinoceros hornbill (No. 20), exon 7, WGS data

- CAP3 alignment of WGS data spanning exon 7 (uppercase letters)

```
SRR952907.12398064.2-   .   :   .   :   .   :   .   :   .   :   .   :
SRR952906.91064646.1-   .   :   .   :   .   :   .   :   .   :   .   :
SRR952907.36862030.1+   .   :   .   :   .   :   .   :   .   :   .   :
SRR952907.4284782.2-   .   :   .   :   .   :   .   :   .   :   .   :
SRR952908.80485683.1-   .   :   .   :   .   :   .   :   .   :   .   :
SRR952908.21742923.2-   .   :   .   :   .   :   .   :   .   :   .   :
SRR952906.2764250.1-   .   :   .   :   .   :   .   :   .   :   .   :
SRR952906.41008395.1+   .   :   .   :   .   :   .   :   .   :   .   :
SRR952908.37143756.2+   .   :   .   :   .   :   .   :   .   :   .   :
SRR952908.61956966.2+   .   :   .   :   .   :   .   :   .   :   .   :
SRR952906.84150441.1+   .   :   .   :   .   :   .   :   .   :   .   :
SRR952907.49893402.2-   .   :   .   :   .   :   .   :   .   :   .   :
SRR952908.26607298.1-   .   :   .   :   .   :   .   :   .   :   .   :
SRR952906.80718732.1-   .   :   .   :   .   :   .   :   .   :   .   :
SRR952908.21402763.1-   .   :   .   :   .   :   .   :   .   :   .   :
SRR952906.59429530.1-   .   :   .   :   .   :   .   :   .   :   .   :
SRR952906.15561415.1-   .   :   .   :   .   :   .   :   .   :   .   :
SRR952906.42235225.1-   .   :   .   :   .   :   .   :   .   :   .   :
SRR952906.46344914.2-   .   :   .   :   .   :   .   :   .   :   .   :
SRR952907.52668539.1-   .   :   .   :   .   :   .   :   .   :   .   :
SRR952908.44612500.2-   .   :   .   :   .   :   .   :   .   :   .   :
SRR952908.7449415.1-   .   :   .   :   .   :   .   :   .   :   .   :
SRR952907.35637368.2-   .   :   .   :   .   :   .   :   .   :   .   :
SRR952908.83232541.2-   .   :   .   :   .   :   .   :   .   :   .   :
SRR952907.60638876.2+   .   :   .   :   .   :   .   :   .   :   .   :
SRR952907.14433590.2+   .   :   .   :   .   :   .   :   .   :   .   :
SRR952908.73514971.1-   .   :   .   :   .   :   .   :   .   :   .   :
SRR952908.3285260.1+   .   :   .   :   .   :   .   :   .   :   .   :
SRR952908.67808806.2-   .   :   .   :   .   :   .   :   .   :   .   :
SRR952908.30780511.2+   .   :   .   :   .   :   .   :   .   :   .   :
SRR952907.42027886.1-   .   :   .   :   .   :   .   :   .   :   .   :

```

consensus

tatgtgtgttacttcagaccccagttctgatgtttctggagtcattgctgaggaatat

```
SRR952907.12398064.2-   .   :   .   :   .   :   .   :   .   :   .   :
SRR952907.36862030.1+   .   :   .   :   .   :   .   :   .   :   .   :
SRR952906.91064646.1-   .   :   .   :   .   :   .   :   .   :   .   :
SRR952907.4284782.2-   .   :   .   :   .   :   .   :   .   :   .   :
SRR952908.80485683.1-   .   :   .   :   .   :   .   :   .   :   .   :
SRR952908.21742923.2-   .   :   .   :   .   :   .   :   .   :   .   :
SRR952906.2764250.1-   .   :   .   :   .   :   .   :   .   :   .   :
SRR952906.41008395.1+   .   :   .   :   .   :   .   :   .   :   .   :
SRR952906.46344914.2-   .   :   .   :   .   :   .   :   .   :   .   :
SRR952908.59429530.1-   .   :   .   :   .   :   .   :   .   :   .   :
SRR952906.15561415.1-   .   :   .   :   .   :   .   :   .   :   .   :
SRR952906.42235225.1-   .   :   .   :   .   :   .   :   .   :   .   :
SRR952906.46344914.2-   .   :   .   :   .   :   .   :   .   :   .   :
SRR952907.52668539.1-   .   :   .   :   .   :   .   :   .   :   .   :
SRR952908.44612500.2-   .   :   .   :   .   :   .   :   .   :   .   :
SRR952908.7449415.1-   .   :   .   :   .   :   .   :   .   :   .   :
SRR952907.35637368.2-   .   :   .   :   .   :   .   :   .   :   .   :
SRR952907.14433590.2+   .   :   .   :   .   :   .   :   .   :   .   :
SRR952908.73514971.1-   .   :   .   :   .   :   .   :   .   :   .   :
SRR952908.3285260.1+   .   :   .   :   .   :   .   :   .   :   .   :
SRR952908.67808806.2-   .   :   .   :   .   :   .   :   .   :   .   :
SRR952908.30780511.2+   .   :   .   :   .   :   .   :   .   :   .   :
SRR952907.42027886.1-   .   :   .   :   .   :   .   :   .   :   .   :
SRR952907.49893402.2-   .   :   .   :   .   :   .   :   .   :   .   :
SRR952906.52668539.1-   .   :   .   :   .   :   .   :   .   :   .   :
SRR952907.60638876.2+   .   :   .   :   .   :   .   :   .   :   .   :
SRR952908.21402763.1-   .   :   .   :   .   :   .   :   .   :   .   :
SRR952908.26607298.1-   .   :   .   :   .   :   .   :   .   :   .   :
SRR952908.30780511.2+   .   :   .   :   .   :   .   :   .   :   .   :
SRR952908.3285260.1+   .   :   .   :   .   :   .   :   .   :   .   :
SRR952908.44612500.2-   .   :   .   :   .   :   .   :   .   :   .   :
SRR952908.67808806.2-   .   :   .   :   .   :   .   :   .   :   .   :
SRR952908.73514971.1-   .   :   .   :   .   :   .   :   .   :   .   :
SRR952908.7449415.1-   .   :   .   :   .   :   .   :   .   :   .   :
SRR952908.83232541.2-   .   :   .   :   .   :   .   :   .   :   .   :
SRR952906.64829881.2-   .   :   .   :   .   :   .   :   .   :   .   :
SRR952906.54633368.2+   .   :   .   :   .   :   .   :   .   :   .   :
SRR952906.35313441.1+   .   :   .   :   .   :   .   :   .   :   .   :
SRR952906.51221028.1-   .   :   .   :   .   :   .   :   .   :   .   :
SRR952906.52004496.2+   .   :   .   :   .   :   .   :   .   :   .   :
SRR952908.71081809.2-   .   :   .   :   .   :   .   :   .   :   .   :
SRR952906.67447501.2+   .   :   .   :   .   :   .   :   .   :   .   :
SRR952906.82311786.1-   .   :   .   :   .   :   .   :   .   :   .   :
SRR952907.62662976.1+   .   :   .   :   .   :   .   :   .   :   .   :

```

SRR952906.21497803.1- TTGATTGACAGCTCAGGGGTACGAATCTACTATACTCCGGAGATACG  
SRR952906.84301423.1+ TTGATTGACAGCTCAGGGGTACGAATCTACTATACTCCGGAGATACG  
SRR952908.30675309.1+ CAGCTCAGGGGTACGAATCTACTATACTCCGGAGATACG  
SRR952908.32192016.1- AGCTCAGGGGTACGAATCTACTATACTCCGGAGATACG  
SRR952906.58628084.1+ TCAGGGGTACGAATCTACTATACTCCGGAGATACG  
SRR952907.5940313.1+ TCAGGGGTACGAATCTACTATACTCCGGAGATACG  
SRR952907.97613.1+ CAGGGGTACGAATCTACTATACTCCGGAGATACG  
SRR952906.82629823.2- AGGGGTACGAATCTACTATACTCCGGAGATACG  
SRR952906.24443860.1+ GGGTACGAATCTACTATACTCCGGAGATACG  
SRR952906.39078225.1+ GGGTACGAATCTACTATACTCCGGAGATACG  
SRR952906.56780568.1- GGGTACGAATCTACTATACTCCGGAGATACG  
SRR952907.62126463.1- TACGAATCTACTATACTCCGGAGATACG  
SRR952906.48043948.2- ACGAATCTACTATACTCCGGAGATACG  
SRR952906.7214801.2- CGAATCTACTATACTCCGGAGATACG  
SRR952908.82698325.1+ CGAATCTACTATACTCCGGAGATACG  
SRR952906.49364931.2+ TCTACTATACTCCGGAGATACG  
SRR952908.67260975.1+ CTACTATACTCCGGAGATACG  
SRR952906.31777324.1- TATACTCCGGAGATACG  
SRR952908.65411360.2+ TATACTCCGGAGATACG  
SRR952906.66046796.1+ ATACTCCGGAGATACG  
SRR952908.21383184.2+ CTCCGGAGATACG  
SRR952908.24524207.1+ CTCCGGAGATACG  
SRR952906.11280118.2+ TCCGGAGATACG  
SRR952906.85026718.2- GAGATACG  
SRR952906.69372439.1- GATACG  
SRR952908.74537743.1+ ATACG  
SRR952906.5395772.1+ CG

consensus

ttcttttacgCCTTGATTGACAGCTCAGGGGTACGAATCTACTATACTCCGGAGATACG

SRR952907.49893402.2- A  
SRR952908.26607298.1- AAAA  
SRR952906.80718732.1- AAAAT  
SRR952908.21402763.1- AAAATATGA  
SRR952906.59429530.1- AAAATATGAT  
SRR952906.15561415.1- AAAATATGATG  
SRR952906.42235225.1- AAAATATGATG  
SRR952907.52668539.1- AAAATATGATGTTGGG  
SRR952908.44612500.2- AAAATATGATGTTGGG  
SRR952908.7449415.1- AAAATATGATGTTGGG  
SRR952907.35637368.2- AAAATATGATGTTGGGATTCTGC  
SRR952908.83232541.2- AAAATATGATGTTGGGATTCTGCAA  
SRR952907.14433590.2+ AAAATATGATGTTGGGATTCTGCAAA  
SRR952907.60638876.2+ AAAATATGATGTTGGGATTCTGCAA  
SRR952908.30780511.2+ AAAGTATGATGTTGGGATCTGCAAA  
SRR952908.73514971.1- AAAATATGATGTTGGGATTCTGCAAAACAGG  
SRR952908.3285260.1+ AAAATATGATGTTGGGATTCTGCAAAACAGGCAT  
SRR952908.67808806.2- AAAATATGATGTTGGGATTCTGCAAAACAGGCAT  
SRR952907.42027886.1- AAAATATGATGTTGGGATTCTGCAAAACAGGCATCTTCAT  
SRR952906.64829881.2- AAAATATGATGTTGGGATTCTGCAAAACAGGCATCTTCATTT  
SRR952906.54633368.2+ AAAATATGATGTTGGGATTCTGCAAAACAGGCATCTTCCTTTT  
SRR952906.35313441.1+ AAAATATGATGTTGGGATTCTGCAAAACAGGCATCTTCATTTTC  
SRR952906.51221028.1- AAAATATGATGTTGGGATTCTGCAAAACAGGCATCTTCATTTTC  
SRR952906.52004496.2+ AAAATATGATGTTGGGATTCTGCAAAACAGGCATCTTCATTTTCCTG  
SRR952908.71081809.2- AAAATATGATGTTGGGATTCTGCAAAACAGGCATCTTCATTTTCCTG  
SRR952906.67447501.2+ AAAATATGATGTTGGGATTCTGCAAAACAGGCATCTTCATTTTCCTGTG  
SRR952906.82311786.1- AAAATATGATGTTGGGATTCTGCAAAACAGGCATCTTCATTTTCCTGTG  
SRR952907.62662976.1+ AAAATATGATGTTGGGATTCTGCAAAACAGGAATCTTCATTTTCCTGTG  
SRR952906.21497803.1- AAAATATGATGTTGGGATTCTGCAAAACAGGCATCTTCATTTTCCTGTGCATTT  
SRR952906.84301423.1+ AAAATATGATGTTGGGATTCTGCAAAACAGGCATCTTCATTTTCCTGTGCATTT  
SRR952906.11280118.2+ AAAATATGATGTTGGGATTCTGCAAAACAGGCATCTTCATTTTCCTGTGCATTTTCATTCCCT  
SRR952906.24443860.1+ AAAATATGATGTTGGGATTCTGCAAAACAGGCATCTTCATTTTCCTGTGCATTTTCATTCCCT  
SRR952906.31777324.1- AAAATATGATGTTGGGATTCTGCAAAACAGGCATCTTCATTTTCCTGTGCATTTTCATTCCCT  
SRR952906.39078225.1+ AAAATATGATGTTGGGATTCTGCAAAACAGGCATCTTCATTTTCCTGTGCATTTTCATTCCCT  
SRR952906.48043948.2- AAAATATGATGTTGGGATTCTGCAAAACAGGCATCTTCATTTTCCTGTGCATTTTCATTCCCT  
SRR952906.49364931.2+ AAAATATGATGTTGGGATTCTGCAAAACAGGCATCTTCATTTTCCTGTGCATTTTCATTCCCT  
SRR952906.5395772.1+ AAAATATGATGTTGGGATTCTGCAAAACAGGCATCTTCATTTTCCTGTGCATTTTCATTCCCT  
SRR952906.56780568.1- AAAATATGATGTTGGGATTCTGCAAAACAGGCATCTTCATTTTCCTGTGCATTTTCATTCCCT  
SRR952906.58628084.1+ AAAATATGATGTTGGGATTCTGCAAAACAGGCATCTTCATTTTCCTGTGCATTTTCATTCCCT  
SRR952906.66046796.1+ AAAATATGATGTTGGGATTCTGCAAAACAGGCATCTTCATTTTCCTGTGCATTTTCATTCCCT  
SRR952906.69372439.1- AAAATATGATGTTGGGATTCTGCAAAACAGGCATCTTCATTTTCCTGTGCATTTTCATTCCCT  
SRR952906.7214801.2- AAAATATGATGTTGGGATTCTGCAAAACAGGCATCTTCATTTTCCTGTGCATTTTCATTCCCT  
SRR952906.82629823.2- AAAATATGATGTTGGGATTCTGCAAAACAGGCATCTTCATTTTCCTGTGCATTTTCATTCCCT  
SRR952906.85026718.2- AAAATATGATGTTGGGATTCTGCAAAACAGGCATCTTCATTTTCCTGTGCATTTTCATTCCCT  
SRR952907.5940313.1+ AAAATATGATGTTGGGATTCTGCAAAACAGGCATCTTCATTTTCCTGTGCATTTTCATTCCCT  
SRR952907.62126463.1- AAAATATGATGTTGGGATTCTGCAAAACAGGCATCTTCATTTTCCTGTGCATTTTCATTCCCT  
SRR952907.97613.1+ AAAATATGATGTTGGGATTCTGCAAAACAGGCATCTTCATTTTCCTGTGCATTTTCATTCCCT  
SRR952908.21383184.2+ AAAATATGATGTTGGGATTCTGCAAAACAGGCATCTTCATTTTCCTGTGCATTTTCATTCCCT  
SRR952908.24524207.1+ AAAATATGATGTTGGGATTCTGCAAAACAGGCATCTTCATTTTCCTGTGCATTTTCATTCCCT  
SRR952908.30675309.1+ AAAATATGATGTTGGGATTCTGCAAAACAGGCATCTTCATTTTCCTGTGCATTTTCATTCCCT  
SRR952908.32192016.1- AAAATATGATGTTGGGATTCTGCAAAACAGGCATCTTCATTTTCCTGTGCATTTTCATTCCCT  
SRR952908.65411360.2+ AAAATATGATGTTGGGATTCTGCAAAACAGGCATCTTCATTTTCCTGTGCATTTTCATTCCCT  
SRR952908.67260975.1+ AAAATATGATGTTGGGATTCTGCAAAACAGGCATCTTCATTTTCCTGTGCATTTTCATTCCCT

SRR952908.74537743.1+ AAAATATGATGTTGGGATTCTGCAAACAGGCATCTTCATTTTCCTGTGCATTTTCATTCCCT  
SRR952908.80888265.1+ AAAATATGATGTTGGGATTCTGCAAACAGGCATCTTCATTTTCCTGTGCATTTTCATTCCCT  
SRR952908.82698325.1+ AAAATATGATGTTGGGATTCTGCAAACAGGCATCTTCATTTTCCTGTGCATTTTCATTCCCT  
SRR952907.55074013.1+ ATATGATGTTGGGATTCTGCAAACAGGCATCTTCATTTTCCTGTGCATTTTCATTCCCT  
SRR952908.67330860.2+ ATGATGTTGGGATTCTGCAAACAGGCATCTTCATTTTCCTGTGCATTTTCATTCCCT  
SRR952907.53257974.2+ GATGTTGGGATTCTGCAAACAGGCATCTTCATTTTCCTGTGCATTTTCATTCCCT  
SRR952908.44698542.1+ GATGTTGGGATTCTGCAAACAGGCATCTTCATTTTCCTGTGCATTTTCATTCCCT  
SRR952907.22004178.1+ TGTTGGGATTCTGCAAACAGGCATCTTCATTTTCCTGTGCATTTTCATTCCCT  
SRR952908.2284886.1+ TGTTGGGATTCTGCAAACAGGCATCTTCATTTTCCTGTGCATTTTCATTCCCT  
SRR952907.26704456.1+ GTTGGGATTCTGCAAACAGGCATCTTCATTTTCCTGTGCATTTTCATTCCCT  
SRR952908.16586946.2+ GTTGGGATTCTGCAAACAGGCATCTTCATTTTCCTGTGCATTTTCATTCCCT  
SRR952906.46865034.2+ TTGGGATTCTGCAAACAGGCATCTTCATTTTCCTGTGCATTTTCATTCCCT  
SRR952906.74252791.1- TTGGGATTCTGCAAACAGGCATCTTCATTTTCCTGTGCATTTTCATTCCCT  
SRR952906.19415127.1- GATTCTGCAAACAGGCATCTTCATTTTCCTGTGCATTTTCATTCCCT  
SRR952906.76417132.1+ ATTTCTGCAAACAGGCATCTTCATTTTCCTGTGCATTTTCATTCCCT  
SRR952906.4505781.2+ CTGCAAACAGGCATCTTCATTTTCCTGTGCATTTTCATTCCCT  
SRR952908.54081938.2- GCAAACAGGCATCTTCATTTTCCTGTGCATTTTCATTCCCT  
SRR952906.9507819.2- AACAGGCATCTTCATTTTCCTGTGCATTTTCATTCCCT  
SRR952907.20559736.2+ CAGGCATCTTCATTTTCCTGTGCATTTTCATTCCCT  
SRR952907.49454300.1+ CAGGCATCTTCATTTTCCTGTGCATTTTCATTCCCT  
SRR952907.53326894.2+ CAGGCATCTTCATTTTCCTGTGCATTTTCATTCCCT  
SRR952907.47208830.1- TTCATTTTCCTGTGCATTTTCATTCCCT  
SRR952907.33609997.2+ CATTTTCCTGTGCATTTTCATTCCCT  
SRR952908.6361494.2+ CATTTTCCTGTGCATTTTCATTCCCT  
SRR952907.36742234.1- TTTTCCTTTGCTTTTCATTCCCT  
SRR952908.3917553.1+ TCCTGTGCATTTTCATTCCCT  
SRR952907.54885943.1- CCTGTCCATTTTCATTCCCT  
SRR952908.18114634.1- CTGTGCATTTTCATTCCCT  
SRR952906.75122442.1+ TGTGCATTTTCATTCCCT  
SRR952906.8692711.1+ CATTTCATTCCCT  
SRR952906.32757671.2- ATTCCT  
SRR952908.77975511.2+ ATTCCT  
SRR952907.42435039.1+ TCCT  
SRR952906.35266711.1+ CCT  
SRR952908.41568795.1- T

consensus

AAAATATGATGTTGGGATTCTGCAAACAGGCATCTTCATTTTCCTGTGCATTTTCATTCCCT

SRR952908.30675309.1+ C  
SRR952908.32192016.1- CC  
SRR952906.58628084.1+ CCTGG  
SRR952907.5940313.1+ CCTGG  
SRR952907.97613.1+ CCTGGG  
SRR952906.82629823.2- CCTGGGG  
SRR952906.24443860.1+ CCTGGGGCA  
SRR952906.39078225.1+ CCTGGGGCA  
SRR952906.56780568.1- CCTGGGGCA  
SRR952907.62126463.1- CCTGGGGCACAA  
SRR952906.48043948.2- CCTGGGGCACAAAT  
SRR952906.7214801.2- CCTGGGGCACAAATC  
SRR952908.82698325.1+ CCTGGGGCACAAATC  
SRR952906.49364931.2+ CCTGGGGCACAAATCCTAC  
SRR952908.67260975.1+ CCTGGGGCACAAATCCTACA  
SRR952906.31777324.1- CCTGGGGCACAAATCCTACAAATC  
SRR952908.65411360.2+ CCTGGGGCACAAATCCTACAAATC  
SRR952906.66046796.1+ CCTGGGGCACAAATCCTACAAATCT  
SRR952908.21383184.2+ CCTGGGGCACAAATCCTACAAATCTTAC  
SRR952908.24524207.1+ CCTGGGGCACAAATCCTACAAATCTTAC  
SRR952906.11280118.2+ CCTGGGGCACAAATCCTACAAATCTTACG  
SRR952906.85026718.2- CCTGGGGCACAAATCCTACAAATCTTACGGCCT  
SRR952906.69372439.1- CCTGGGGCACAAATCCTACAAATCTTACGGCCTTT  
SRR952908.74537743.1+ CCTGGGGCACAAATCCTACAAATCTTACGGCCTTTG  
SRR952906.5395772.1+ CCTGGGGCACAAATCCTACAAATCTTACGGCCTTTGCAA  
SRR952908.80888265.1+ CCTGGGGCACAAATCCTACAAATCTTACGGCCTTTGCAATT  
SRR952907.53257974.2+ CCTGGGGCACAAATCTAAAATCTTACGGCCTTTGCAATT  
SRR952907.55074013.1+ CCTGGGGCACAAATCCTACAAATCTTACGGCCTTTGCAATTCCA  
SRR952908.67330860.2+ CCTGGGGCACAAATCCTACAAATCTTACGGCCTATGCAATTCCAGC  
SRR952908.44698542.1+ CCTGGGGCACAAATCCTACAAATCTTACGGCCTTTGCAATTCCAGCCA  
SRR952907.22004178.1+ CCTGGGGCACAAATCCTACAAATCTTACGGCCTTTGCAATTCCAGCCAGT  
SRR952908.2284886.1+ CCTGGGGCACAAATCCTACAAATCTTACGGCCTTTGCAATTCCAGCCAGT  
SRR952907.26704456.1- CCTGGGGCACAAATCCTACAAATCTTACGGCCTTTGCAATTCCAGCCAGTT  
SRR952908.16586946.2+ CCTGGGGCACAAATCCTACAAATCTTACGGCCTTTGCAATTCCAGCCAGTT  
SRR952906.46865034.2+ CCTGGGGCACAAATCCTACAAATCTTACGGCCTTTGCAATTCCAGCCAGTTT  
SRR952906.74252791.1- CCTGGGGCACAAATCCTACAAATCTTACGGCCTTTGCAATTCCAGCCAGTTT  
SRR952906.19415127.1- CCTGGGGCACAAATCCTACAAATCTTACGGCCTTTGCAATTCCAGCCAGTTTGATG  
SRR952906.76417132.1+ CCTGGGGCACAAATCCTACAAATCTTACGGCCTTTGCAATTCCAGCCAGTTTGATGA  
SRR952906.4505781.2+ CCTGGGGCACAAATCCTACAAATCTTACGGCCTTTGCAATTCCAGCCAGTTTGATGA  
SRR952906.32757671.2- CCTGGGGCACAAATCCTACAAATCTTACGGCCTTTGCAATTCCAGCCAGTTTGATGA  
SRR952906.35266711.1+ CCTGGGGCACAAATCCTACAAATCTTACGGCCTTTGCAATTCCAGCCAGTTTGATGA  
SRR952906.8692711.1+ CCTGGGGCACAAATCCTACAAATCTTACGGCCTTTGCAATTCCAGCCAGTTTGATGA  
SRR952906.9507819.2- CCTGGGGCACAAATCCTACAAATCTTACGGCCTTTGCAATTCCAGCCAGTTTGATGA  
SRR952907.20559736.2+ CCTGGGGCACAAATCCTACAAATCTTACGGCCTTTGCAATTCCAGCCAGTTTGATGA

SRR952907.33609997.2+ CCTGGGGCACAATCTACAAATCTTACGGCCTTTGCAATTCAGCCAGTTTGATGAAgtg  
SRR952907.36742234.1- CCTGGGGCACAATCTACAAATCTTACGGCCTTTGCAATTCAGCCAGTTTGATGAAgtg  
SRR952907.42435039.1+ CCTGGGGCACAATCTACAAATCTTACGGCCTTTGCAATTCAGCCAGTTTGATGAAgtg  
SRR952907.47208830.1- CTGGGGCACAATCTACAAATCTTACGGCCTTTGCAATTCAGCCAGTTTGATGAAgtg  
SRR952907.49454300.1+ CCTGGGGCACAATCTACAAATCTTACGGCCTTTGCAATTCAGCCAGTTTGATGAAgtg  
SRR952907.53326894.2+ CCTGGGGCACAATCTACAAATCTTACGGCCTTTGCAATTCAGCCAGTTTGATGAAgtg  
SRR952907.54885943.1- CCTGGGGCACAATCTACAAATCTTACGGCCTTTGCAATTCAGCCAGTTTGATGAAgtg  
SRR952908.18114634.1- CCTGGGGCACAATCTACAAATCTTACGGCCTTTGCAATTCAGCCAGTTTGATGAAgtg  
SRR952908.3917553.1+ CCTGGGGCACAATCTACAAATCTTACGGCCTTTGCAATTCAGCCAGTTTGATGAAgtg  
SRR952908.41568795.1- CCTGGGGCACAATCTACAAATCTTACGGCCTTTGCAATTCAGCCAGTTTGATGAAgtg  
SRR952908.54081938.2- CCTGGGGCACAATCTACAAATCTTACGGCCTTTGCAATTCAGCCAGTTTGATGAAgtg  
SRR952908.6361494.2+ CCTGGGGCACAATCTACAAATCTTACGGCCTTTGCAATTCAGCCAGTTTGATGAAgtg  
SRR952908.77975511.2+ CCTGGGGCACAATCTACAAATCTTACGGCCTTTGCAATTCAGCCAGTTTGATGAAgtg  
SRR952906.58506595.1+ GGGCACAATCTACAAATCTTACGGCCTTTGCAATTCAGCCAGTTTGATGAAgtg  
SRR952908.50300589.1+ GCACAATCTACAAATCTTACGGCCTTTGCAATTCAGCCAGTTTGATGAAgtg  
SRR952908.51680848.1+ ACAATCTACAAATCTTACGGCCTTTGCAATTCAGCCAGTTTGATGAAgtg  
SRR952907.3574533.1+ CAATCTACAAATCTTACGGCCTTTGCAATTCAGCCAGTTTGATGAAgtg  
SRR952908.76321323.1+ CAATCTACAAATCTTACGGCCTTTGCAATTCAGCCAGTTTGATGAAgtg  
SRR952906.77934628.2+ CTACAAATCTTACGGCCTTTGCAATTCAGCCAGTTTGATGAAgtg  
SRR952906.50682290.2+ CAAATCTTACGGCCTTTGCAATTCAGCCAGTTTGATGAAgtg  
SRR952908.49037486.2+ CAAATCTTACGGCCTTTGCAATTCAGCCAGTTTGATGAAgtg  
SRR952908.74322018.2+ AAATCTTACGGCCTTTGCAATTCAGCCAGTTTGATGAAgtg  
SRR952907.32150617.2- GCCTTTGCAATTCAGCCAGTTTGATGAAgtg

consensus

CCTGGGGCACAATCTACAAATCTTACGGCCTTTGCAATTCAGCCAGTTTGATGAAgtg

SRR952908.54081938.2- a  
SRR952906.9507819.2- agtg  
SRR952907.20559736.2+ agtgtg  
SRR952907.49454300.1+ agtgtg  
SRR952907.53326894.2+ agtgtg  
SRR952908.3917553.1+ agtgtggg  
SRR952907.36742234.1- agtgtgggga  
SRR952907.47208830.1- agtgtggggaagc  
SRR952907.33609997.2+ agtgtggggaagcga  
SRR952908.6361494.2+ agtgtggggaagcca  
SRR952907.54885943.1- agtgtggggaagccat  
SRR952908.18114634.1- agtgtggggaagccatacaaat  
SRR952906.75122442.1+ agtgtggggaagccatacaaat  
SRR952906.8692711.1+ agtgtggggaagccatacaaatcttt  
SRR952906.32757671.2- agtgtggggaagccatacaaatctttcttga  
SRR952908.77975511.2+ agtgtggggaagccatacaaatctttcttga  
SRR952907.42435039.1+ agtgtggggaagccatacaaatctttcttgaact  
SRR952906.35266711.1+ agtgtggggaagccatacaaatctttcttgaact  
SRR952908.41568795.1- agtgtggggaagccatacaaatctttcttgaacttcc  
SRR952906.58506595.1+ agtgtggggaagccatacaaatctttcttgaacttccacact  
SRR952908.50300589.1+ agtgtggggaagccatacaaatctttcttgaacttccacactt  
SRR952908.51680848.1+ agtgtggggaagccatacaaatctttcttgaacttccacacttgg  
SRR952907.3574533.1+ agtgtggggaagccatacaaatctttcttgaacttccacacttggg  
SRR952908.76321323.1+ agtgtggggaagccatacaaatctttcttgaacttccacacttggg  
SRR952906.77934628.2+ agtgtggggaagccatacaaatctttcttgaacttccacacttgggctttc  
SRR952906.50682290.2+ agtgtggggaagccatacaaatctttcttgaacttccacacttgggctttc  
SRR952908.49037486.2+ agtgtggggaagccatacaaatctttcttgaacttccacacttgggctttc  
SRR952908.74322018.2+ agtgtggggaagccatacaaatctttcttgaacttccacacttgggctttc  
SRR952907.32150617.2- agtgtggggaagccatacaaatctttcttgaacttccacacttgggctttc

consensus

agtgtggggaagccatacaaatctttcttgaacttccacacttgggctttc





SRR943146.16880733.1- tggagtcactggatgaagaagtggcaatttttgttttacagATTTGATTGACAGTTCAGG  
SRR943146.20533547.1+ tggagtcattggatgaagaagtggcaatttttgttttacagATTTGATTGACAGTTCAGG  
SRR943146.24636360.2- tggagtcactggatgaagaagtggcaatttttgttttacagATTTGATTGACAGTTCAGG  
SRR943146.37708858.1- tggagtcactggatgaagaagtggcaatttttgttttacagATTTGATTGACAGTTCAGG  
SRR943146.38846969.2- tggattcattggatgaagaagttagcaatttttgttttacagATTTGATTGACAGTTCAGG  
SRR943146.38943217.1+ tggagtcactggatgaagaagtggcaatttttgttttacagATTTGATTGACAGTTCAGG  
SRR943146.56821384.2+ tggagtcactggatgaagaagtggcaatttttgttttacagATTTGATTGACAGTTCAGG  
SRR943146.57346176.1- tggagtcactggatgaagaagtggcaatttttgttttacagATTTGATTGACAGTTCAGG  
SRR943146.60669571.2- tggagtcactggatgaagaagtggcaatttttgttttacagATTTGATTGACAGTTCAGG  
SRR943146.70638704.1- tggagtcattggatgaagaagtggcaatttttgttttacagATTTGATTGACAGTTCAGG  
SRR943146.88081757.1+ tggagtcactggatgaagaagtggcaatttttgttttacagATTTGATTGACAGTTCAGG  
SRR943146.96096379.1+ tggagtcactggatgaagaagtggcaatttttgttttacagATTTGATTGACAGTTCAGG  
SRR943146.99253409.2+ tggagtcactggatgaagaagtggcaatttttgttttacagATTTGATTGACAGTTCAGG  
SRR943147.22901505.2+ tggagtcactggatgaagaagtggcaatttttgttttacagATTTGATTGACAGTTCAGG  
SRR943148.12227873.1- tggagtcactggatgaagaagtggcaatttttgttttacagATTTGATTGACAGTTCAGG  
SRR943148.80431057.1- tggagtcactggatgaagaagtggcaatttttgttttacagATTTGATTGACAGTTCAGG  
SRR943143.117003318.1+ tggagtcactggatgaagaagtggcaatttttgttttacagATTTGATTGACAGTTCAGG  
SRR943144.65768613.2- tggagtcactggatgaagaagtggcaatttttgttttacagATTTGATTGACAGTTCAGG  
SRR943148.40077430.1- tggagtcactggatgaagaagtggcaatttttgttttacagATTTGATTGACAGTTCAGG  
SRR943148.61883455.1- tggagtcactggatgaagaagtggcaatttttgttttacagATTTGATTGACAGTTCAGG  
SRR943150.60834945.2+ tggagtcactggatgaagaagtggcaatttttgttttacagATTTGATTGACAGTTCAGG  
SRR943153.78469985.1- tggagtcactggatgaagaagtggcaatttttgttttacagATTTGATTGACAGTTCAGG  
SRR943144.130236616.2+ tggagtcactggatgaagaagtggcaatttttgttttacagATTTGATTGACAGTTCAGG  
SRR943148.45501956.2+ tggagtcactggatgaagaagtggcaatttttgttttacagATTTGATTGACAGTTCAGG  
SRR943144.38598998.1- tggagtcactggatgaagaagtggcaatttttgttttacagATTTGATTGACAGTTCAGG  
SRR943149.73275911.1- tggagtcactggatgaagaagtggcaatttttgttttacagATTTGATTGACAGTTCAGG  
SRR943143.104139687.2+ tggagtcactggatgaagaagtggcaatttttgttttacagATTTGATTGACAGTTCAGG  
SRR943143.7465013.1- tggagtcactggatgaagaagtggcaatttttgttttacagATTTGATTGACAGTTCAGG  
SRR943144.94389262.1- tggagtcactggatgaagaagtggcaatttttgttttacagATTTGATTGACAGTTCAGG  
SRR943147.58951334.2+ tggagtcactggatgaagaagtggcaatttttgttttacagATTTGATTGACAGTTCAGG  
SRR943143.59649683.2- tggagtcactggatgaagaagtggcaatttttgttttacagATTTGATTGACAGTTCAGG  
SRR943144.63460008.1- tggagtcactggatgaagaagtggcaatttttgttttacagATTTGATTGACAGTTCAGG  
SRR943144.25313586.2- tggagtcactggatgaagaagtggcaatttttgttttacagATTTGATTGACAGTTCAGG  
SRR943144.58987988.1- tggagtcactggatgaagaagtggcaatttttgttttacagATTTGATTGACAGTTCAGG  
SRR943143.12418561.1- tggagtcactggatgaagaagtggcaatttttgttttacagATTTGATTGACAGTTCAGG  
SRR943149.73739647.1+ tggagtcactggatgaagaagtggcaatttttgttttacagATTTGATTGACAGTTCAGG  
SRR943151.20532827.1+ tggagtcactggatgaagaagtggcaatttttgttttacagATTTGATTGACAGTTCAGG  
SRR943151.33137181.1+ tggagtcactggatgaagaagtggcaatttttgttttacagATTTGATTGACAGTTCAGG  
SRR943151.49445837.1+ tggagtcactggatgaagaagtggcaatttttgttttacagATTTGATTGACAGTTCAGG  
SRR943151.83316320.1+ tggagtcactggatgaagaagtggcaatttttgttttacagATTTGATTGACAGTTCAGG  
SRR943151.92173533.1+ tggagtcactggatgaagaagtggcaatttttgttttacagATTTGATTGACAGTTCAGG  
SRR943151.97997498.1+ tggagtcactggatgaagaagtggcaatttttgttttacagATTTGATTGACAGTTCAGG  
SRR943146.113926285.2- tggagtcactggatgaagaagtggcaatttttgttttacagATTTGATTGACAGTTCAGG  
SRR943149.3686943.2+ tggagtcactggatgaagaagtggcaatttttgttttacagATTTGATTGACAGTTCAGG  
SRR943149.78051790.2+ tggagtcactggatgaagaagtggcaatttttgttttacagATTTGATTGACAGTTCAGG  
SRR943144.1487824.2- tggagtcactggatgaagaagtggcaatttttgttttacagATTTGATTGACAGTTCAGG  
SRR943143.89649215.2+ tggagtcactggatgaagaagtggcaatttttgttttacagATTTGATTGACAGTTCAGG  
SRR943146.106284797.2- tggagtcactggatgaagaagtggcaatttttgttttacagATTTGATTGACAGTTCAGG  
SRR943146.81925975.2+ tggagtcactggatgaagaagtggcaatttttgttttacagATTTGATTGACAGTTCAGG  
SRR943151.33893871.2+ tggagtcactggatgaagaagtggcaatttttgttttacagATTTGATTGACAGTTCAGG  
SRR943147.7530622.2- tggagtcactggatgaagaagtggcaatttttgttttacagATTTGATTGACAGTTCAGG  
SRR943148.5209468.2+ tggagtcactggatgaagaagtggcaatttttgttttacagATTTGATTGACAGTTCAGG  
SRR943144.46004729.1+ tggagtcactggatgaagaagtggcaatttttgttttacagATTTGATTGACAGTTCAGG  
SRR943146.62058440.2- tggagtcactggatgaagaagtggcaatttttgttttacagATTTGATTGACAGTTCAGG  
SRR943151.89390003.1+ tggagtcactggatgaagaagtggcaatttttgttttacagATTTGATTGACAGTTCAGG  
SRR943143.115573669.1+ tggagtcactggatgaagaagtggcaatttttgttttacagATTTGATTGACAGTTCAGG  
SRR943145.1810097.1- tggagtcactggatgaagaagtggcaatttttgttttacagATTTGATTGACAGTTCAGG  
SRR943148.4628954.1+ tggagtcactggatgaagaagtggcaatttttgttttacagATTTGATTGACAGTTCAGG  
SRR943146.28553096.2+ tggagtcactggatgaagaagtggcaatttttgttttacagATTTGATTGACAGTTCAGG  
SRR943145.57608674.1+ tggagtcactggatgaagaagtggcaatttttgttttacagATTTGATTGACAGTTCAGG  
SRR943149.90288787.2+ tggagtcactggatgaagaagtggcaatttttgttttacagATTTGATTGACAGTTCAGG  
SRR943153.71670252.2- tggagtcactggatgaagaagtggcaatttttgttttacagATTTGATTGACAGTTCAGG  
SRR943145.48591543.2+ tggagtcactggatgaagaagtggcaatttttgttttacagATTTGATTGACAGTTCAGG  
SRR943145.69292912.1- tggagtcactggatgaagaagtggcaatttttgttttacagATTTGATTGACAGTTCAGG  
SRR943153.42045335.2+ tggagtcactggatgaagaagtggcaatttttgttttacagATTTGATTGACAGTTCAGG  
SRR943143.106713870.1+ tggagtcactggatgaagaagtggcaatttttgttttacagATTTGATTGACAGTTCAGG  
SRR943143.41825835.1+ tggagtcactggatgaagaagtggcaatttttgttttacagATTTGATTGACAGTTCAGG  
SRR943143.106665816.1+ tggagtcactggatgaagaagtggcaatttttgttttacagATTTGATTGACAGTTCAGG  
SRR943143.93970140.2- tggagtcactggatgaagaagtggcaatttttgttttacagATTTGATTGACAGTTCAGG  
SRR943147.61967811.2- tggagtcactggatgaagaagtggcaatttttgttttacagATTTGATTGACAGTTCAGG  
SRR943149.6086161.1+ tggagtcactggatgaagaagtggcaatttttgttttacagATTTGATTGACAGTTCAGG  
SRR943153.49100440.2+ tggagtcactggatgaagaagtggcaatttttgttttacagATTTGATTGACAGTTCAGG  
SRR943144.134799716.1+ tggagtcactggatgaagaagtggcaatttttgttttacagATTTGATTGACAGTTCAGG  
SRR943145.4137743.2+ tggagtcactggatgaagaagtggcaatttttgttttacagATTTGATTGACAGTTCAGG  
SRR943146.13788959.2+ tggagtcactggatgaagaagtggcaatttttgttttacagATTTGATTGACAGTTCAGG  
SRR943144.13635896.1+ tggagtcactggatgaagaagtggcaatttttgttttacagATTTGATTGACAGTTCAGG  
SRR943145.42788029.1- tggagtcactggatgaagaagtggcaatttttgttttacagATTTGATTGACAGTTCAGG  
SRR943149.18492996.2- tggagtcactggatgaagaagtggcaatttttgttttacagATTTGATTGACAGTTCAGG  
SRR943147.3318547.1+ tggagtcactggatgaagaagtggcaatttttgttttacagATTTGATTGACAGTTCAGG  
SRR943148.4470618.2+ tggagtcactggatgaagaagtggcaatttttgttttacagATTTGATTGACAGTTCAGG  
SRR943143.51827441.1- tggagtcactggatgaagaagtggcaatttttgttttacagATTTGATTGACAGTTCAGG  
SRR943148.73412914.1+ tggagtcactggatgaagaagtggcaatttttgttttacagATTTGATTGACAGTTCAGG  
SRR943153.20644198.1+ tggagtcactggatgaagaagtggcaatttttgttttacagATTTGATTGACAGTTCAGG  
SRR943146.15632033.1+ tggagtcactggatgaagaagtggcaatttttgttttacagATTTGATTGACAGTTCAGG



SRR943146.24636360.2- GGTATGAATCACCAGAGCTACGGAAATATGAT  
SRR943149.18492996.2- GGTATGAATCACCAGAGCTACGGAAATATGAT  
SRR943144.52466857.1+ GGTATGAATCACCAGAGCTACGGAAATATGATG  
SRR943148.4470618.2+ GGTATGAATCACCAGAGCTACGGAAATATGATG  
SRR943144.36431995.1+ GGTATGAATCACCAGAGCTACGGAAATATGATGT  
SRR943146.70638704.1- GGTATGAATCACCAGAGCTACGGAAATATGATGT  
SRR943148.73412914.1+ GGTATGAATCACCAGAGCTACGGAAATATGATGT  
SRR943153.20644198.1+ GGTATGAATCACCAGAGCTACGGAAATATGATGT  
SRR943144.124836672.2- GGTATGAATCACCAGAGCTACGGAAATATGATGTGGG  
SRR943143.41571662.1- GGTATGAATCACCAGAGCTACGGAAATATGATGTGGGG  
SRR943146.112914742.2+ GGTATGAATCACCAGAGCTACGGAAATATGATGTGGGGAT  
SRR943146.99253409.2+ GGTATGAATCACCAGAGCTACGGAAATATGATGTGGGGAT  
SRR943148.78207349.2- GGTATGAATCACCAGAGCTACGGAAATATGATGTGGGGAT  
SRR943148.88063584.2- GGTATGAATCACCAGAGCTACGGAAATATGATGTGGGGAT  
SRR943153.100375048.2- GGTATGAATCACCAGAGCTACGGAAATATGATGTGGGGAT  
SRR943152.102397740.1- GGTATGAATCACCAGAGCTACGGAAATATGATGTGGGGATTCT  
SRR943152.31868961.1- GGTATGAATCACCAGAGCTACGGAAATATGATGTGGGGATTCT  
SRR943152.65964492.1- GGTATGAATCACCAGAGCTACGGAAATATGATGTGGGGATTCT  
SRR943152.85082107.1- GGTATGAATCACCAGAGCTACGGAAATATGATGTGGGGATTCT  
SRR943152.99181241.1- GGTATGAATCACCAGAGCTACGGAAATATGATGTGGGGATTCT  
SRR943152.99975745.1- GGTATGAATCACCAGAGCTACGGAAATATGATGTGGGGATTCT  
SRR943143.80431057.1- GGTATGAATCACCAGAGCTACGGAAATATGATGTGGGGATTCTG  
SRR943144.16651012.2+ GGTATGAATCACCAGAGCTACGGAAATATGCTGTGGGGATTCTG  
SRR943153.15751132.1+ GGTATGAATCACCAGAGCTACGGAAATATGATGTGGGGATTCTG  
SRR943143.117003318.1+ GGTATGAATCACCAGAGCTACGGAAATATGATGTGGGGATTCTG  
SRR943150.20185035.2- GGTATGAATCACCAGAGCTACGGAAATATGATGTGGGGATTCTGCAA  
SRR943150.27211556.2- GGTATGAATCACCAGAGCTACGGAAATATGATGTGGGGATTCTGCAA  
SRR943144.128147151.2+ GGTATGAATCACCAGAGCTACGGAAATATGATGTGGGGATTCTGCAGAC  
SRR943153.47365653.1- GGTATGAATCACCAGAGCTACGGAAATATGATGTGGGGATTCTGCAAAC  
SRR943153.50402848.1- GGTATGAATCACCAGAGCTACGGAAATATGATGTGGGGATTCTGCAAAC  
SRR943143.104139687.2+ GGTATGAATCACCAGAGCTACGGAAATATGATGTGGGGATTCTGCAAACAGGT  
SRR943143.7465013.1- GGTATGAATCACCAGAGCTACGGAAATATGATGTGGGGATTCTGCAAACAGGT  
SRR943144.64698558.1- GGTATGAATCACCAGAGCTACGGAAATATGATGTGGGGATTCTGCAAACAGGT  
SRR943147.58951334.2+ GGTATGAATCACCAGAGCTACGGAAATATGATGTGGGGATTCTGCAAACAGGT  
SRR943143.59649683.2- GGTATGAATCACCAGAGCTACGGAAATATGATGTGGGGATTCTGCAAACAGGTGTC  
SRR943144.120268833.1- GGTATGAATCACCAGAGCTACGGAAATATGATGTGGGGATTCTGCAAACAGGTGTCT  
SRR943144.58987988.2+ GGTATGAATCACCAGAGCTACGGAAATATGATGTGGGGATTCTGCAAACAGGTGTCT  
SRR943144.38598998.2+ GGTATGAATCACCAGAGCTACGGAAATATGATGTGGGGATTCTGCAAACAGGNNGT  
SRR943144.63460008.2+ GGTATGAATCACCAGAGCTACGGAAATATGATGTGGGGATTCTGCAAACAGCTGTGTT  
SRR943143.106665816.1+ GGTATGAATCACCAGAGCTACGGAAATATGATGTGGGGATTCTGCAAACAGGTGTCTTCA  
SRR943143.106713870.1+ GGTATGAATCACCAGAGCTACGGAAATATGATGTGGGGATTCTGCAAACAGGTGTCTTCA  
SRR943143.113297297.2+ GGTATGAATCACCAGAGCTACGGAAATATGATGTGGGGATTCTGCAAACAGGTGTCTTCA  
SRR943143.115573669.1+ GGTATGAATCACCAGAGCTACGGAAATATGATGTGGGGATTCTGCAAACAGGTGTCTTCA  
SRR943143.12418561.1- GGTATGAATCACCAGAGCTACGGAAATATGATGTGGGGATTCTGCAAACAGGTGTCTTCA  
SRR943143.26110525.1+ GGTATGAATCACCAGAGCTACGGAAATATGATGTGGGGATTCTGCAAACAGGTGTCTTCA  
SRR943143.41825835.1+ GGTATGAATCACCAGAGCTACGGAAATATGATGTGGGGATTCTGCAAACAGGTGTCTTCA  
SRR943143.51827441.1- GGTATGAATCACCAGAGCTACGGAAATATGATGTGGGGATTCTGCAAACAGGTGTCTTCA  
SRR943143.78524906.2+ GGTATGAATCACCAGAGCTACGGAAATATGATGTGGGGATTCTGCAAACAGGTGTCTTCA  
SRR943143.89649215.2+ GGTATGAATCACCAGAGCTACGGAAATATGATGTGGGGATTCTGCAAACAGGTGTCTTCA  
SRR943143.93970140.2- GGTATGAATCACCAGAGCTACGGAAATATGATGTGGGGATTCTGCAAACAGGTGTCTTCA  
SRR943144.128147151.1- GGTATGAATCACCAGAGCTACGGAAATATGATGTGGGGATTCTGCAAACAGGTGTCTTCA  
SRR943144.130236616.2+ GGTATGAATCACCAGAGCTACGGAAATATGATGTGGGGATTCTGCAAACAGGTGTCTTCA  
SRR943144.134799716.1+ GGTATGAATCACCAGAGCTACGGAAATATGATGTGGGGATTCTGCAAACAGGTGTCTTCA  
SRR943144.13635896.1+ GGTATGAATCACCAGAGCTACGGAAATATGATGTGGGGATTCTGCAAACAGGTGTCTTCA  
SRR943144.1487824.1+ GGTATGAATCACCAGAGCTACGGAAATATGATGTGGGGATTCTGCAAACAGGTGTCTTCA  
SRR943144.1487824.2- GGTATGAATCACCAGAGCTACGGAAATATGATGTGGGGATTCTGCAAACAGGTGTCTTCA  
SRR943144.16651012.1- GGTATGAATCACCAGAGCTACGGAAATATGATGTGGGGATTCTGCAAACAGGTGTCTTCA  
SRR943144.25313586.1+ GGTATGAATCACCAGAGCTACGGAAATATGATGTGGGGATTCTGCAAACAGGTGTCTTCA  
SRR943144.25313586.2- GGTATGAATCACCAGAGCTACGGAAATATGATGTGGGGATTCTGCAAACAGGTGTCTTCA  
SRR943144.33496876.1- GGTATGAATCACCAGAGCTACGGAAATATGATGTGGGGATTCTGCAAACAGGTGTCTTCA  
SRR943144.36431995.2- GGTATGAATCACCAGAGCTACGGAAATATGATGTGGGGATTCTGCAAACAGGTGTCTTCA  
SRR943144.38598998.1- GGTATGAATCACCAGAGCTACGGAAATATGATGTGGGGATTCTGCAAACAGGTGTCTTCA  
SRR943144.46004729.1+ GGTATGAATCACCAGAGCTACGGAAATATGATGTGGGGATTCTGCAAACAGGTGTCTTCA  
SRR943144.52466857.2- GGTATGAATCACCAGAGCTACGGAAATATGATGTGGGGATTCTGCAAACAGGTGTCTTCA  
SRR943144.58987988.1- GGTATGAATCACCAGAGCTACGGAAATATGATGTGGGGATTCTGCAAACAGGTGTCTTCA  
SRR943144.63460008.1- GGTATGAATCACCAGAGCTACGGAAATATGATGTGGGGATTCTGCAAACAGGTGTCTTCA  
SRR943144.65768613.1+ GGTATGAATCACCAGAGCTACGGAAATATGATGTGGGGATTCTGCAAACAGGTGTCTTCA  
SRR943144.65768613.2- GGTATGAATCACCAGAGCTACGGAAATATGATGTGGGGATTCTGCAAACAGGTGTCTTCA  
SRR943144.94389262.1- GGTATGAATCACCAGAGCTACGGAAATATGATGTGGGGATTCTGCAAACAGGTGTCTTCA  
SRR943144.94389262.2+ GGTATGAATCACCAGAGCTACGGAAATATGATGTGGGGATTCTGCAAACAGGTGTCTTCA  
SRR943145.11325062.1- GGTATGAATCACCAGAGCTACGGAAATATGATGTGGGGATTCTGCAAACAGGTGTCTTCA  
SRR943145.1810097.1- GGTATGAATCACCAGAGCTACGGAAATATGATGTGGGGATTCTGCAAACAGGTGTCTTCA  
SRR943145.38435938.2+ GGTATGAATCACCAGAGCTACGGAAATATGATGTGGGGATTCTGCAAACAGGTGTCTTCA  
SRR943145.4137743.2+ GGTATGAATCACCAGAGCTACGGAAATATGATGTGGGGATTCTGCAAACAGGTGTCTTCA  
SRR943145.41988875.1+ GGTATGAATCACCAGAGCTACGGAAATATGATGTGGGGATTCTGCAAACAGGTGTCTTCA  
SRR943145.42788029.1- GGTATGAATCACCAGAGCTACGGAAATATGATGTGGGGATTCTGCAAACAGGTGTCTTCA  
SRR943145.48591543.2+ GGTATGAATCACCAGAGCTACGGAAATATGATGTGGGGATTCTGCAAACAGGTGTCTTCA  
SRR943145.52626318.1+ GGTATGAATCACCAGAGCTACGGAAATATGATGTGGGGATTCTGCAAACAGGTGTCTTCA  
SRR943145.57608674.1+ GGTATGAATCACCAGAGCTACGGAAATATGATGTGGGGATTCTGCAAACAGGTGTCTTCA  
SRR943145.59637562.2- GGTATGAATCACCAGAGCTACGGAAATATGATGTGGGGATTCTGCAAACAGGTGTCTTCA  
SRR943145.69188289.2- GGTATGAATCACCAGAGCTACGGAAATATGATGTGGGGATTCTGCAAACAGGTGTCTTCA  
SRR943145.69292912.1- GGTATGAATCACCAGAGCTACGGAAATATGATGTGGGGATTCTGCAAACAGGTGTCTTCA  
SRR943146.106284797.2- GGTATGAATCACCAGAGCTACGGAAATATGATGTGGGGATTCTGCAAACAGGTGTCTTCA  
SRR943146.110572913.2- GGTATGAATCACCAGAGCTACGGAAATATGATGTGGGGATTCTGCAAACAGGTGTCTTCA

SRR943146.113926285.2- GGTATGAATCACCAGAGCTACGGAAATATGATGTGGGGATTCTGCAAACAGGTGTCTTCA  
SRR943146.13788959.2+ GGTATGAATCACCAGAGCTACGGAAATATGATGTGGGGATTCTGCAAACAGGTGTCTTCA  
SRR943146.15632033.1+ GGTATGAATCACCAGAGCTACGGAAATATGATGTGGGGATTCTGCAAACAGGTGTCTTCA  
SRR943146.17538271.1+ GGTATGAATCACCAGAGCTACGGAAATATGATGTGGGGATTCTGCAAACAGGGTCTTCA  
SRR943146.25190807.1- GGTATGAATCACCAGAGCTACGGAAATATGATGTGGGGATTCTGCAAACAGGTGTCTTCA  
SRR943146.28553096.2+ GGTATGAATCACCAGAGCTACGGAAATATGATGTGGGGATTCTGCAAACAGGTGTCTTCA  
SRR943146.62058440.2- GGTATGAATCACCAGAGCTACGGAAATATGATGTGGGGATTCTGCAAACAGGTGTCTTCA  
SRR943146.75164931.1- GGTATGAATCACCAGAGCTACGGAAATATGATGTGGGGATTCTGCAAACAGGTGTCTTCA  
SRR943146.75372287.2- GGTATGAATCACCAGAGCTACGGAAATATGATGTGGGGATTCTGCAAACAGGTGTCTTCA  
SRR943146.81925975.2+ GGTATGAATCACCAGAGCTACGGAAATATGATGTGGGGATTCTGCAAACAGGTGTCTTCA  
SRR943146.99816648.1- GGTATGAATCACCAGAGCTACGGAAATATGATGTGGGGATTCTGCAAACAGGTGTCTTCA  
SRR943147.14377517.2+ GGTATGAATCACCAGAGCTACGGAAATATGATGTGGGGATTCTGCAAACAGGTGTCTTCA  
SRR943147.3318547.1+ GGTATGAATCACCAGAGCTACGGAAATATGATGTGGGGATTCTGCAAACAGGTGTCTTCA  
SRR943147.61967811.2- GGTATGAATCACCAGAGCTACGGAAATATGATGTGGGGATTCTGCAAACAGGTGTCTTCA  
SRR943147.7530622.2- GGTATGAATCACCAGAGCTACGGAAATATGATGTGGGGATTCTGCAAACAGGTGTCTTCA  
SRR943153.19521073.1- TATGAATCACCAGAGCTACGGAAATATGATGTGGGGATTCTGCAAACAG  
SRR943153.91968749.1- TATGAATCACCAGAGCTACGGAAATATGATGTGGGGATTCTGCAAACAG  
SRR943149.84401868.2- ATGAATCACCAGAGCTACGGAAATATGATGTGGGGATTCTGCAAACAGG  
SRR943146.95141330.1+ ATGAATCACCAGAGCTACGGAAATATGATGTGGGGATTCTGCAAACAGGTGTCTTCA  
SRR943147.51805956.1- GAATCACCAGAGCTACGGAAATATGATGTGGGGATTCTGCAAACAGGTGTCTTCA  
SRR943143.117003318.2- AATCACCAGAGCTACGGAAATATGATGTGGGGATTCTGCAAACAGGTGTCTTCA  
SRR943147.41610683.1+ ATCACCAGAGCTACGGAAATATGATGTGGGGATTCTGCAAACAGGTGTCTTCA  
SRR943145.58569145.2+ CACCAGAGCTACGGAAATATGATGTGGGGATTCTGCAAACAGGTGTCTTCA  
SRR943147.40896979.2+ CACCAGAGCTACGGAAATATGATGTGGGGATTCTGCAAACAGGTGTCTTCA  
SRR943147.9963273.2+ CACCAGAGCTACGGAAATATGATGTGGGGATTCTGCAAACAGGTGTCTTCA  
SRR943143.104139687.1- ACCAGAGCTACGGAAATATGATGTGGGGATTCTGCAAACAGGTGTCTTCA  
SRR943146.88097701.1- ACCAGAGCTACGGAAATAGGATGTGGGGATTCTGCAAACAGGTGTCTTCA  
SRR943147.12183045.2+ ACCAGAGCTACGGAAATATGATGTGGGGATTCTGCAAACAGGTGTCTTCA  
SRR943143.110177944.2+ CCAGAGCTACGGAAATATGATGTGGGGATTCTGCAAACAGGTGTCTTCA  
SRR943147.53191156.1+ CCAGAGCTACGGAAATATGATGTGGGGATTCTGCAAACAGGTGTCTTCA  
SRR943152.16507538.1+ CCAGAGCTACGGAAATATGATGTGGGGATTCTGCAAACAGGTGTCTTCA  
SRR943143.85000359.1+ CAGAGCTACGGAAATATGATGTGGGGATTCTGCAAACAGGTGTCTTCA  
SRR943150.20620102.2- GAGCTACGGAAATATGATGTGGGGATTCTGCAAACAGGTGTCTTCA  
SRR943150.49081874.2- GAGCTACGGAAATATGATGTGGGGATTCTGCAAACAGGTGTCTTCA  
SRR943143.44324018.2+ TACGAAATATGATGTGGGGATTCTGCAAACAGGTGTCTTCA  
SRR943143.98833310.2+ TACGAAATATGATGTGGGGATTCTGCAAACAGGTGTCTTCA  
SRR943153.50148005.1+ TACGAAATATGATGTGGGGATTCTGCAAACAGGTGTCTTCA  
SRR943143.89649215.1- ACGAAATATGATGTGGGGATTCTGCAAACAGGTGTCTTCA  
SRR943153.85576202.1- ACGAAATATGATGTGGGGATTCTGCAAACAGGTGTCTTCA  
SRR943145.55459185.2- CGGAAATATGATGTGGGGATTCTGCAAACAGGTGTCTTCA  
SRR943146.106410727.1+ CGGAAATATGATGTGGGGATTCTGCAAACAGGTGTCTTCA  
SRR943151.32180301.2+ CGGAAATATGATGTGGGGATTCTGCAAACAGGTGTCTTCA  
SRR943151.35942467.2+ CGGAAATATGATGTGGGGATTCTGCAAACAGGTGTCTTCA  
SRR943151.37483907.2+ CGGAAATATGATGTGGGGATTCTGCAAACAGGTGTCTTCA  
SRR943151.42764520.2+ CGGAAATATGATGTGGGGATTCTGCAAACAGGTGTCTTCA  
SRR943151.46891216.2+ CGGAAATATGATGTGGGGATTCTGCAAACAGGTGTCTTCA  
SRR943151.48744472.2+ CGGAAATATGATGTGGGGATTCTGCAAACAGGTGTCTTCA  
SRR943151.57682362.2+ CGGAAATATGATGTGGGGATTCTGCAAACAGGTGTCTTCA  
SRR943151.70629567.2+ CGGAAATATGATGTGGGGATTCTGCAAACAGGTGTCTTCA  
SRR943151.73554194.2+ CGGAAATATGATGTGGGGATTCTGCAAACAGGTGTCTTCA  
SRR943151.96055972.2+ CGGAAATATGATGTGGGGATTCTGCAAACAGGTGTCTTCA  
SRR943151.98557232.2+ CGGAAATATGATGTGGGGATTCTGCAAACAGGTGTCTTCA  
SRR943143.107878190.1+ GGAAATATGATGTGGGGATTCTGCAAACAGGTGTCTTCA  
SRR943147.36150911.2- GGAAATATGATGTGGGGATTCTGCAAACAGGTGTCTTCA  
SRR943153.36028462.2- GGAAATATGATGTGGGGATTCTGCAAACAGGTGTCTTCA  
SRR943146.13936469.2- GAAATATGATGTGGGGATTCTGCAAACAGGTGTCTTCA  
SRR943148.20800129.2- GAAATATGATGTGGGGATTCTGCAAACAGGTGTCTTCA  
SRR943144.46004729.2- AAATTTGATGTGGGGATTCTGCAAACAGGTGTCTTCA  
SRR943145.13993241.1+ AAATATGATGTGGGGATTCTGCAAACAGGTGTCTTCA  
SRR943146.3316304.2+ AATATGATGTGGGGATTCTGCAAACAGGTGTCTTCA  
SRR943143.41825835.2- ATATGATGTGGGGATTCTGCAAACAGGTGTCTTCA  
SRR943144.134799716.2- ATATGATGTGGGGATTCTGCAAACAGGTGTCTTCA  
SRR943144.13635896.2- ATATGATGTGGGGATTCTGCAAACAGGTGTCTTCA  
SRR943145.6158089.1+ ATATGATGTGGGGATTCTGCAAACAGGTGTCTTCA  
SRR943146.98785799.1+ ATATGATGTGGGGATTCTGCAAACAGGTGTCTTCA  
SRR943143.115573669.2- TATGATGTGGGGATTCTGCAAACAGGTGTCTTCA  
SRR943143.13911124.1+ TATGATGTGGGGATTCTGCAAACAGGTGTCTTCA  
SRR943145.1935921.2- TATGATGTGGGGATTCTGCAAACAGGTGTCTTCA  
SRR943146.53723254.2+ ATGATGTGGGGATTCTGCAAACAGGTGTCTTCA  
SRR943145.48367946.2- TGATGTGGGGATTCTGCAAACAGGTGTCTTCA  
SRR943146.68438362.2- TGATGTGGGGATTCTGCAAACAGGTGTCTTCA  
SRR943146.13911030.2- GATGTGGGGATTCTGCAAACAGGTGTCTTCA  
SRR943149.32803211.1- ATGTGGGGATTCTGCAAACAGGTGTCTTCA  
SRR943143.78524906.1- TGTGGGGATTCTGCAAACAGGTGTCTTCA  
SRR943146.113655658.1+ TGTGGGGATTCTGCAAACAGGTGTCTTCA  
SRR943148.71970949.2+ TGTGGGGATTCTGCAAACAGGTGTCTTCA  
SRR943149.16484339.1- TGTGGGGATTCTGCAAACAGGTGTCTTCA  
SRR943143.106665816.2- GGGGATTCTGCAAACAGGTGTCTTCA  
SRR943146.93080774.2+ GGGGATTCTGCAAACAGGTGTCTTCA  
SRR943144.139888000.1+ GGATCTGCAAACAGGTGTCTTCA  
SRR943153.29753373.2+ GGATCTGCAAACAGGTGTCTTCA  
SRR943146.42700050.1+ ATTCTGCAAACAGGTGTCTTCA  
SRR943149.100001168.2+ ATTCTGCAAACAGGTGTCTTCA  
SRR943145.12257330.2+ TTCTGCAAACAGGTGTCTTCA



SRR943147.3318547.1+ TTTTCCCTGTGCATTTTCATTCCCC  
SRR943143.51827441.1- TTTTCCCTGTGCATTTTCATTCCCCC  
SRR943144.16651012.1- TTTTCCCTGTGCATTTTCATTCCCCC  
SRR943153.29753373.2+ TTTTCCCTGTGCATTTTCATTCCCCC  
SRR943146.15632033.1+ TTTTCCCTGTGCATTTTCATTCCCCCT  
SRR943146.75372287.2- TTTTCCCTGTGCATTTTCATTCCCCCT  
SRR943144.128147151.1- TTTTCCCTGTGCATTTTCATTCCCCCTG  
SRR943145.52626318.1+ TTTTCCCTGTGCATTTTCATTCCCCCTG  
SRR943145.59637562.2- TTTTCCCTGTGCATTTTCATTCCCCCTG  
SRR943149.100001168.2+ TTTTCCCTGTGCATTTTCATTCCCCCTG  
SRR943143.78524906.2+ TTTTCCCTGTGCATTTTCATTCCCCCTGG  
SRR943145.41988875.1+ TTTTCCCTGTGCATTTTCATTCCCCCTGG  
SRR943146.25190807.1- TTTTCCCTGTGCATTTTCATTCCCCCTGGAG  
SRR943146.17538271.1+ TTTTCCCTGTGCATTTTCATTCCCCCTGGAGC  
SRR943153.18720358.2+ TTTTCCCTGTGCATTTTCATTCCCCCTGGAGC  
SRR943143.26110525.1+ TTTTCCCTGTGCATTTTCATTCCCCCTGGAGCA  
SRR943145.38435938.2+ TTTTCCCTGTGCATTTTCATTCCCCCTGGAGCA  
SRR943148.56461203.2- TTTTCCCTGTGCATTTTCATTCCCCCTGGAGCA  
SRR943143.113297297.2+ TTTTCCCTGTGCATTTTCATTCCCCCTGGAGCAG  
SRR943145.11325062.1- TTTTCCCTGTGCATTTTCATTCCCCCTGGAGCAGA  
SRR943145.69188289.2- TTTTCCCTGTGCATTTTCATTCCCCCTGGAGCAGA  
SRR943147.14377517.2+ TTTTCCCTGTGCATTTTCATTCCCCCTGGAGCAGA  
SRR943144.65768613.2- TTTTCCCTGTGCATTTTCATTCCCCCTGGAGCAGAA  
SRR943146.110572913.2- TTTTCCCTGTGCATTTTCATTCCCCCTGGAGCAGAA  
SRR943146.99816648.1- TTTTCCCTGTGCATTTTCATTCCCCCTGGAGCAGAA  
SRR943149.92763631.2+ TTTTCCCTGTGCATTTTCATTCCCCCTGGAGCAGAA  
SRR943148.33856345.2- TTTTCCCTGTGCATTTTCATTCCCCCTGGAGCAGAA  
SRR943144.130236616.2+ TTTTCCCTGTGCATTTTCATTCCCCCTGGAGCAGAA  
SRR943149.41927252.1- TTTTCCCTGTGCATTTTCATTCCCCCTGGAGCAGAA  
SRR943149.64475155.1- TTTTCCCTGTGCATTTTCATTCCCCCTGGAGCAGAA  
SRR943146.75164931.1- TTTTCCCTGTGCATTTTCATTCCCCCTGGAGCAGAA  
SRR943148.8321592.1+ TTTTCCCTGTGCATTTTCATTCCCCCTGGAGCAGAA  
SRR943144.38598998.1- TTTTCCCTGTGCATTTTCATTCCCCCTGGAGCAGAA  
SRR943144.25313586.2- TTTTCCCTGTGCATTTTCATTCCCCCTGGAGCAGAA  
SRR943149.74210498.2- TTTTCCCTGTGCATTTTCATTCCCCCTGGAGCAGAA  
SRR943153.98584337.2- TTTTCCCTGTGCATTTTCATTCCCCCTGGAGCAGAA  
SRR943144.94389262.1- TTTTCCCTGTGCATTTTCATTCCCCCTGGAGCAGAA  
SRR943146.95141330.1+ TTTTCCCTGTGCATTTTCATTCCCCCTGGAGCAGAA  
SRR943153.65873285.2- TTTTCCCTGTGCATTTTCATTCCCCCTGGAGCAGAA  
SRR943147.51805956.1- TTTTCCCTGTGCATTTTCATTCCCCCTGGAGCAGAA  
SRR943149.18002460.2- TTTTCCCTGTGCATTTTCATTCCCCCTGGAGCAGAA  
SRR943143.117003318.2- TTTTCCCTGTGCATTTTCATTCCCCCTGGAGCAGAA  
SRR943144.63460008.1- TTTTCCCTGTGCATTTTCATTCCCCCTGGAGCAGAA  
SRR943147.41610683.1+ TTTTCCCTGTGCATTTTCATTCCCCCTGGAGCAGAA  
SRR943144.58987988.1- TTTTCCCTGTGCATTTTCATTCCCCCTGGAGCAGAA  
SRR943145.58569145.2+ TTTTCCCTGTGCATTTTCATTCCCCCTGGAGCAGAA  
SRR943147.40896979.2+ TTTTCCCTGTGCATTTTCATTCCCCCTGGAGCAGAA  
SRR943147.9963273.2+ TTTTCCCTGTGCATTTTCATTCCCCCTGGAGCAGAA  
SRR943143.104139687.1- TTTTCCCTGTGCATTTTCATTCCCCCTGGAGCAGAA  
SRR943146.88097701.1- TTTTCCCTGTGCATTTTCATTCCCCCTGGAGCAGAA  
SRR943147.12183045.2+ TTTTCCCTGTGCATTTTCATTCCCCCTGGAGCAGAA  
SRR943143.110177944.2+ TTTTCCCTGTGCATTTTCATTCCCCCTGGAGCAGAA  
SRR943147.53191156.1+ TTTTCCCTGTGCATTTTCATTCCCCCTGGAGCAGAA  
SRR943143.85000359.1+ TTTTCCCTGTGCATTTTCATTCCCCCTGGAGCAGAA  
SRR943144.1487824.2- TTTTCCCTGTGCATTTTCATTCCCCCTGGAGCAGAA  
SRR943143.44324018.2+ TTTTCCCTGTGCATTTTCATTCCCCCTGGAGCAGAA  
SRR943143.98833310.2+ TTTTCCCTGTGCATTTTCATTCCCCCTGGAGCAGAA  
SRR943143.89649215.1- TTTTCCCTGTGCATTTTCATTCCCCCTGGAGCAGAA  
SRR943143.106665816.2- TTTTCCCTGTGCATTTTCATTCCCCCTGGAGCAGAA  
SRR943143.106713870.2- TTTTCCCTGTGCATTTTCATTCCCCCTGGAGCAGAA  
SRR943143.107878190.1+ TTTTCCCTGTGCATTTTCATTCCCCCTGGAGCAGAA  
SRR943143.110177944.1- TTTTCCCTGTGCATTTTCATTCCCCCTGGAGCAGAA  
SRR943143.113297297.1- TTTTCCCTGTGCATTTTCATTCCCCCTGGAGCAGAA  
SRR943143.115573669.2- TTTTCCCTGTGCATTTTCATTCCCCCTGGAGCAGAA  
SRR943143.13398540.2+ TTTTCCCTGTGCATTTTCATTCCCCCTGGAGCAGAA  
SRR943143.13911124.1+ TTTTCCCTGTGCATTTTCATTCCCCCTGGAGCAGAA  
SRR943143.33813501.2+ TTTTCCCTGTGCATTTTCATTCCCCCTGGAGCAGAA  
SRR943143.41825835.2- TTTTCCCTGTGCATTTTCATTCCCCCTGGAGCAGAA  
SRR943143.60106320.1+ TTTTCCCTGTGCATTTTCATTCCCCCTGGAGCAGAA  
SRR943143.78524906.1- TTTTCCCTGTGCATTTTCATTCCCCCTGGAGCAGAA  
SRR943143.85862572.2+ TTTTCCCTGTGCATTTTCATTCCCCCTGGAGCAGAA  
SRR943143.90158177.1+ TTTTCCCTGTGCATTTTCATTCCCCCTGGAGCAGAA  
SRR943144.102539740.2+ TTTTCCCTGTGCATTTTCATTCCCCCTGGAGCAGAA  
SRR943144.134799716.1+ TTTTCCCTGTGCATTTTCATTCCCCCTGGAGCAGAA  
SRR943144.134799716.2- TTTTCCCTGTGCATTTTCATTCCCCCTGGAGCAGAA  
SRR943144.13635896.1+ TTTTCCCTGTGCATTTTCATTCCCCCTGGAGCAGAA  
SRR943144.13635896.2- TTTTCCCTGTGCATTTTCATTCCCCCTGGAGCAGAA  
SRR943144.139888000.1+ TTTTCCCTGTGCATTTTCATTCCCCCTGGAGCAGAA  
SRR943144.46004729.1+ TTTTCCCTGTGCATTTTCATTCCCCCTGGAGCAGAA  
SRR943144.46004729.2- TTTTCCCTGTGCATTTTCATTCCCCCTGGAGCAGAA  
SRR943144.64510980.1+ TTTTCCCTGTGCATTTTCATTCCCCCTGGAGCAGAA  
SRR943145.12257330.2+ TTTTCCCTGTGCATTTTCATTCCCCCTGGAGCAGAA  
SRR943145.13463055.2- TTTTCCCTGTGCATTTTCATTCCCCCTGGAGCAGAA  
SRR943145.13993241.1+ TTTTCCCTGTGCATTTTCATTCCCCCTGGAGCAGAA

SRR943145.14723638.1+ TTTTCCTGTGCATTTTCATTTCCCCCTGGAGCAGAATCCTACAGATCTTATGGACTTTGCA  
SRR943145.16844422.1- GTTTCCCTGTGCATTTTCATTTCCCCCTGGAGCAGAATCCTACAGATCTTATGGACTTTGCA  
SRR943145.1935921.2- TTTTCCTGTGCATTTTCATTTCCCCCTGGAGCAGAATCCTACAGATCTTATGGACTTTGCA  
SRR943145.20588671.1+ TTTTCCTGTGCATTTTCATTTCCCCCTGGAGCAGAATCCTACAGATCTTATGGACTTTGCA  
SRR943145.25852643.2- TTTTCCTGTGCATTTTCATTTCCCCCTGGAGCAGAATCCTACAGATCTTATGGACTTTGCA  
SRR943145.48367946.2- TTTTCCTGTGCATTTTCATTTCCCCCTGGAGCAGAATCCTACAGATCTTATGGACTTTGCA  
SRR943145.55459185.2- TTTTCCTGTGCATTTTCATTTCCCCCTGGAGCAGAATCCTACAGATCTTATGGACTTTGCA  
SRR943145.6158089.1+ TTTTCCTGTGCATTTTCATTTCCCCCTGGAGCAGAATCCTACAGATCTTATGGACTTTGCA  
SRR943146.106410727.1+ TTTTCCTGTGCATTTTCATTTCCCCCTGGAGCAGAATCCTACAGATCTTATGGACTTTGCA  
SRR943146.113655658.1+ TTTTCCTGTGCATTTTCATTTCCCCCTGGAGCAGAATCCTACAGATCTTATGGACTTTGCA  
SRR943146.13911030.2- TTTTCCTGTGCATTTTCATTTCCCCCTGGAGCAGAATCCTACAGATCTTATGGACTTTGCA  
SRR943146.13936469.2- TTTTCCTGTGCATTTTCATTTCCCCCTGGAGCAGAATCCTACAGATCTTATGGACTTTGCA  
SRR943146.3316304.2+ TTTTCCTGTGCATTTTCATTTCCCCCTGGAGCAGAATCCTACAGATCTTATGGACTTTGCA  
SRR943146.42700050.1+ TTTTCCTGTGCATTTTCATTTCCCCCTGGAGCAGAATCCTACAGATCTTATGGACTTTGCA  
SRR943146.53723254.2+ TTTTCCTGTGCATTTTCATTTCCCCCTGGAGCAGAATCCTACAGATCTTATGGACTTTGCA  
SRR943146.61065462.2- TTTTCCTGTGCATTTTCATTTCCCCCTGGAGCAGAATCCTACAGATCTTATGGACTTTGCA  
SRR943146.68438362.2- TTTTCCTGTGCATTTTCATTTCCCCCTGGAGCAGAATCCTACAGATCTTATGGACTTTGCA  
SRR943146.91719564.1+ TTTTCCTGTGCATTTTCATTTCCCCCTGGAGCAGAATCCTACAGATCTTATGGACTTTGCA  
SRR943146.93080774.2+ TTTTCCTGTGCATTTTCATTTCCCCCTGGAGCAGAATCCTACAGATCTTATGGACTTTGCA  
SRR943146.98785799.1+ TTTTCCTGTGCATTTTCATTTCCCCCTGGAGCAGAATCCTACAGATCTTATGGACTTTGCA  
SRR943147.14001746.1- TTTTCCTGTGCATTTTCATTTCCCCCTGGAGCAGAATCCTACAGATCTTATGGACTTTGCA  
SRR943147.17163453.1- TTTTCCTGTGCATTTTCATTTCCCCCTGGAGCAGAATCCTACAGATCTTATGGACTTTGCA  
SRR943147.27862538.2+ TTTTCCTGTGCATTTTCATTTCCCCCTGGAGCAGAATCCTACAGATCTTATGGACTTTGCA  
SRR943147.36150911.2- TTTTCCTGTGCATTTTCATTTCCCCCTGGAGCAGAATCCTACAGATCTTATGGACTTTGCA  
SRR943147.4719698.1+ TTTTCCTGTGCATTTTCATTTCCCCCTGGAGCAGAATCCTACAGATCTTATGGACTTTGCA  
SRR943147.6502784.1+ TTTTCCTGTGCATTTTCATTTCCCCCTGGAGCAGAATCCTACAGATCTTATGGACTTTGCA  
SRR943143.26110525.2- TTTTCCTGTGCATTTTCATTTCCCCCTGGAGCAGAATCCTACAGATCTTATGGACTTTGCA  
SRR943148.97637212.2- TCCTTGTGCATTTTCATTTCCCCCTGGAGCAGAATCCTACAGATCTTATGG  
SRR943149.100054377.2+ TCCTTGTGCATTTTCATTTCCCCCTGGAGCAGAATCCTACAGATCTTATGG  
SRR943149.27586442.2+ TCCTTGTGCATTTTCATTTCCCCCTGGAGCAGAATCCTACAGATCTTATGG  
SRR943151.26860935.2- CCTTGTGCATTTTCATTTCCCCCTGGAGCAGAATCCTACAGATCTTATGGA  
SRR943151.28687755.1+ CCTTGTGCATTTTCATTTCCCCCTGGAGCAGAATCCTACAGATCTTATGGA  
SRR943151.34878530.1+ CCTTGTGCATTTTCATTTCCCCCTGGAGCAGAATCCTACAGATCTTATGGA  
SRR943151.42922701.1+ CCTTGTGCATTTTCATTTCCCCCTGGAGCAGAATCCTACAGATCTTATGGA  
SRR943151.4303772.1+ CCTTGTGCATTTTCATTTCCCCCTGGAGCAGAATCCTACAGATCTTATGGA  
SRR943151.57379942.1+ CCTTGTGCATTTTCATTTCCCCCTGGAGCAGAATCCTACAGATCTTATGGA  
SRR943151.82615231.1+ CCTTGTGCATTTTCATTTCCCCCTGGAGCAGAATCCTACAGATCTTATGGA  
SRR943146.50372746.1+ CCCTGTGCATTTTCATTTCCCCCTGGAGCAGAATCCTACAGATCTTATGGACTTTGCA  
SRR943147.63110318.2+ CCTTGTGCATTTTCATTTCCCCCTGGAGCAGAATCCTACAGATCTTATGGACTTTGCA  
SRR943147.22932053.2+ CCTTGTGCATTTTCATTTCCCCCTGGAGCAGAATCCTACAGATCTTATGGACTTTGCA  
SRR943143.53168784.1+ CTGTGCATTTTCATTTCCCCCTGGAGCAGAATCCTACAGATCTTATGGACTTTGCA  
SRR943143.85000359.2- TTGTGCATTTTCATTTCCCCCTGGAGCAGAATCCTACAGATCTTATGGACTTTGCA  
SRR943153.51811801.1- TGTGCATTTTCATTTCCCCCTGGAGCAGAATCCTACAGATCTTATGGACTT  
SRR943153.74875920.2- TGTGCATTTTCATTTCCCCCTGGAGCAGAATCCTACAGATCTTATGGACTT  
SRR943149.9994123.1- TGCATTTTCATTTCCCCCTGGAGCAGAATCCTACAGATCTTATGGACTTTG  
SRR943146.99173336.1+ CATTTTCATTTCCCCCTGGAGCAGAATCCTACAGATCTTATGGACTTTGCA  
SRR943148.28683594.1+ CATTTTCATTTCCCCCTGGAGCAGAATCCTACAGATCTTATGGACTTTGCA  
SRR943146.4306804.2+ ATTTTCATTTCCCCCTGGAGCAGAATCCTACAGATCTTATGGACTTTGCA  
SRR943149.18673434.2+ ATTTTCATTTCCCCCTGGAGCAGAATCCTACAGATCTTATGGACTTTGCA  
SRR943144.139888000.2- TCATTTCCCCCTGGAGCAGAATCCTACAGATCTTATGGACTTTGCA  
SRR943146.78904130.1+ TCATTTCCCCCTGGAGCAGAATCCTACAGATCTTATGGACTTTGCA  
SRR943143.24007821.2+ CATTTCCCCCTGGAGCAGAATCCTACAGATCTTATGGACTTTGCA  
SRR943153.13386580.1- CATTTCCCCCTGGAGCAGAATCCTACAGATCTTATGGACTTTGCA  
SRR943153.24651648.1+ CATTTCCCCCTGGAGCAGAATCCTACAGATCTTATGGACTTTGCA  
SRR943153.27887061.1+ CATTTCCCCCTGGAGCAGAATCCTACAGATCTTATGGACTTTGCA  
SRR943153.68699168.1+ CATTTCCCCCTGGAGCAGAATCCTACAGATCTTATGGACTTTGCA  
SRR943143.3390929.1+ TTCCCCCTGGAGCAGAATCCTACAGATCTTATGGACTTTGCA  
SRR943153.36526551.1+ TTCCCCCTGGAGCAGAATCCTACAGATCTTATGGACTTTGCA  
SRR943153.28565111.2- TCCCCCTGGAGCAGAATCCTACAGATCTTATGGACTTTGCA  
SRR943143.38136470.2+ CCCCCTGGAGCAGAATCCTACAGATCTTATGGACTTTGCA  
SRR943143.98833310.1- CCCCCTGGAGCAGAATCCTACAGATCTTATGGACTTTGCA  
SRR943145.5154494.1+ CCCCCTGGAGCAGAATCCTACAGATCTTATGGACTTTGCA  
SRR943146.102623222.1+ CCCCCTGGAGCAGAATCCTACAGATCTTATGGACTTTGCA  
SRR943148.87857597.1+ CCCCCTGGAGCAGAATCCTACAGATCTTATGGACTTTGCA  
SRR943153.25243409.1+ CCCCCTGGAGCAGAATCCTACAGATCTTATGGACTTTGCA  
SRR943153.76099028.1+ CCCCCTGGAGCAGAATCCTACAGATCTTATGGACTTTGCA  
SRR943143.13346873.2+ CCCTGGAGCAGAATCCTACAGATCTTATGGACTTTGCA  
SRR943145.33850655.2+ CCTTGGAGCAGAATCCTACAGATCTTATGGACTTTGCA  
SRR943143.29420079.2+ CCTTGGAGCAGAATCCTACAGATCTTATGGACTTTGCA  
SRR943146.74416486.2+ CCTTGGAGCAGAATCCTACAGATCTTATGGACTTTGCA  
SRR943153.57703573.2+ CCTTGGAGCAGAATCCTACAGATCTTATGGACTTTGCA  
SRR943143.50272004.2+ CTGGAGCAGAATCCTACAGATCTTATGGACTTTGCA  
SRR943145.33050274.1+ CTGGAGCAGAATCCTACAGATCTTATGGACTTTGCA  
SRR943143.16082287.2+ GGAGCAGAATCCTACAGATCTTATGGACTTTGCA  
SRR943149.55608470.1- AGAATCCTACAGATCTTATGGACTTTGCA  
SRR943143.36194330.2+ GAATCCTACAGATCTTATGGACTTTGCA  
SRR943144.130096723.2+ GAATCCTACAGATCTTATGGACTTTGCA  
SRR943146.27451379.1+ GAATCCTACAGATCTTATGGACTTTGCA  
SRR943148.19805333.2+ AATCCTACAGATCTTATGGACTTTGCA  
SRR943150.39935377.2- ATCCTACAGATCTTATGGACTTTGCA  
SRR943145.54221246.2- TACAGTTTTAGGGACTTTGCA  
SRR943144.102539740.1- ACAGATCTTATGGACTTTGCA  
SRR943143.8864295.1+ CAGATCTTATGGACTTTGCA  
SRR943144.64510980.2- CAGATTTTATGGACTTTGCA





SRR943147.17163453.1- ATCCAGCCAGTTTGGATGAAgtgagtggtg  
SRR943146.91719564.1+ ATCCAGCCAGTTTGGATGAAgtgagtggtggg  
SRR943153.77678041.1+ ATCCAGCCAGTTTGGATGAAgtgagtggtggg  
SRR943153.101884461.1+ ATCCAGCCAGTTTGGATGAAgtgagtggtgggga  
SRR943146.61065462.2- ATCCAGCCAGTTTGGATGAAgtgagtggtggggac  
SRR943143.113297297.1- ATCCAGCCAGTTTGGATGAAgtgagtggtggggaca  
SRR943147.14001746.1- ATCCAGCCAGTTTGGATGAAgtgagtggtggggaca  
SRR943148.54804425.1+ ATCCAGCCAGTTTGGATGAAgtgagtggtggggacagc  
SRR943148.57817572.1+ ATCCAGCCAGTTTGGATGAAgtgagtggtggggacagc  
SRR943149.98757513.1+ ATCCAGCCAGTTTGGATGAAgtgagtggtggggacagc  
SRR943143.110177944.1- ATCCAGCCAGTTTGGATGAAgtgagtggtggggacagcc  
SRR943153.24661380.1+ ATCCAGCCAGTTTGGATGAAgtgagtggtggggacagcca  
SRR943153.58254396.1+ ATCCAGCCAGTTTGGATGAAgtgagtggtggggacagcca  
SRR943153.59925388.1+ ATCCAGCCAGTTTGGATGAAgtgagtggtggggacagcca  
SRR943153.64863673.1+ ATCCAGCCAGTTTGGATGAAgtgagtggtggggacagcca  
SRR943143.13398540.2+ ATCCAGCCAGTTTGGATGAAgtgagtggtggggacagccat  
SRR943143.26110525.2- ATCCAGCCAGTTTGGATGAAgtgagtggtggggacagccatac  
SRR943153.43817899.2- ATCCAGCCAGTTTGGATGAAgtgagtggtggggacagccatac  
SRR943146.50372746.1+ ATCCAGCCAGTTTGGATGAAgtgagtggtggggacagccatacga  
SRR943147.63110318.2+ ATCCAGCCAGTTTGGATGAAgtgagtggtggggacagccatacga  
SRR943147.22932053.2+ ATCCAGCCAGTTTGGATGAAgtgagtggtggggacagccatacga  
SRR943143.53168784.1+ ATCCAGCCAGTTTGGATGAAgtgagtggtggggacagccatacga  
SRR943143.85000359.2- ATCCAGCCAGTTTGGATGAAgtgagtggtggggacagccatacga  
SRR943152.25540084.1- ATCCAGCCAGTTTGGATGAAgtgagtggtggggacagccatacga  
SRR943152.46942647.1- ATCCAGCCAGTTTGGATGAAgtgagtggtggggacagccatacga  
SRR943152.54814985.1- ATCCAGCCAGTTTGGATGAAgtgagtggtggggacagccatacga  
SRR943152.68904552.1- ATCCAGCCAGTTTGGATGAAgtgagtggtggggacagccatacga  
SRR943152.71600879.1- ATCCAGCCAGTTTGGATGAAgtgagtggtggggacagccatacga  
SRR943152.76910800.1- ATCCAGCCAGTTTGGATGAAgtgagtggtggggacagccatacga  
SRR943151.28175422.1+ ATCCAGCCAGTTTGGATGAAgtgagtggtggggacagccatacga  
SRR943151.59977855.1+ ATCCAGCCAGTTTGGATGAAgtgagtggtggggacagccatacga  
SRR943153.33066696.1- ATCCAGCCAGTTTGGATGAAgtgagtggtggggacagccatacga  
SRR943153.92497752.1- ATCCAGCCAGTTTGGATGAAgtgagtggtggggacagccatacga  
SRR943144.46004729.2- ATCCAGCCAGTTTGGATGAAgtgagtggtggggacagccatacga  
SRR943146.99173336.1+ ATCCAGCCAGTTTGGATGAAgtgagtggtggggacagccatacga  
SRR943146.4306804.2+ ATCCAGCCAGTTTGGATGAAgtgagtggtggggacagccatacga  
SRR943144.134799716.2- ATCCAGCCAGTTTGGATGAAgtgagtggtggggacagccatacga  
SRR943144.13635896.2- ATCCAGCCAGTTTGGATGAAgtgagtggtggggacagccatacga  
SRR943146.78904130.1+ ATCCAGCCAGTTTGGATGAAgtgagtggtggggacagccatacga  
SRR943143.24007821.2+ ATCCAGCCAGTTTGGATGAAgtgagtggtggggacagccatacga  
SRR943143.3390929.1+ ATCCAGCCAGTTTGGATGAAgtgagtggtggggacagccatacga  
SRR943143.98833310.1- ATCCAGCCAGTTTGGATGAAgtgagtggtggggacagccatacga  
SRR943143.13346873.2+ ATCCAGCCAGTTTGGATGAAgtgagtggtggggacagccatacga  
SRR943143.13398540.1- ATCCAGCCAGTTTGGATGAAgtgagtggtggggacagccatacga  
SRR943143.16082287.2+ ATCCAGCCAGTTTGGATGAAgtgagtggtggggacagccatacga  
SRR943143.29420079.2+ ATCCAGCCAGTTTGGATGAAgtgagtggtggggacagccatacga  
SRR943143.31714114.2+ ATCCAGCCAGTTTGGATGAAgtgagtggtggggacagccatacga  
SRR943143.36194330.2+ ATCCAGCCAGTTTGGATGAAgtgagtggtggggacagccatacga  
SRR943143.38136470.2+ ATCCAGCCAGTTTGGATGAAgtgagtggtggggacagccatacga  
SRR943143.50272004.1- ATCCAGCCAGTTTGGATGAAgtgagtggtggggacagccatacga  
SRR943143.50272004.2+ ATCCAGCCAGTTTGGATGAAgtgagtggtggggacagccatacga  
SRR943143.53168784.2- ATCCAGCCAGTTTGGATGAAgtgagtggtggggacagccatacga  
SRR943143.60106320.2- ATCCAGCCAGTTTGGATGAAgtgagtggtggggacagccatacga  
SRR943143.8864295.1+ ATCCAGCCAGTTTGGATGAAgtgagtggtggggacagccatacga  
SRR943143.90158177.2- ATCCAGCCAGTTTGGATGAAgtgagtggtggggacagccatacga  
SRR943144.102539740.1- ATCCAGCCAGTTTGGATGAAgtgagtggtggggacagccatacga  
SRR943144.102539740.2+ ATCCAGCCAGTTTGGATGAAgtgagtggtggggacagccatacga  
SRR943144.130096723.2+ ATCCAGCCAGTTTGGATGAAgtgagtggtggggacagccatacga  
SRR943144.139888000.1+ ATCCAGCCAGTTTGGATGAAgtgagtggtggggacagccatacga  
SRR943144.139888000.2- ATCCAGCCAGTTTGGATGAAgtgagtggtggggacagccatacga  
SRR943144.53424615.2+ ATCCAGCCAGTTTGGATGAAgtgagtggtggggacagccatacga  
SRR943144.64510980.1+ ATCCAGCCAGTTTGGATGAAgtgagtggtggggacagccatacga  
SRR943144.64510980.2- ATCCAGCCAGTTTGGATGAAgtgagtggtggggacagccatacga  
SRR943144.86236498.1+ ATCCAGCCAGTTTGGATGAAgtgagtggtggggacagccatacga  
SRR943145.18692254.2- ATCCAGCCAGTTTGGATGAAgtgagtggtggggacagccatacga  
SRR943145.33050274.1+ ATCCAGCCAGTTTGGATGAAgtgagtggtggggacagccatacga  
SRR943145.33850655.2+ ATCCAGCCAGTTTGGATGAAgtgagtggtggggacagccatacga  
SRR943145.48955657.1- ATCCAGCCAGTTTGGATGAAgtgagtggtggggacagccatacga  
SRR943145.5154494.1+ ATCCAGCCAGTTTGGATGAAgtgagtggtggggacagccatacga  
SRR943145.54221246.2- ATCCAGCCAGTTTGGATGAAgtgagtggtggggacagccatacga  
SRR943145.60888623.2+ ATCCAGCCAGTTTGGATGAAgtgagtggtggggacagccatacga  
SRR943146.102623222.1+ ATCCAGCCAGTTTGGATGAAgtgagtggtggggacagccatacga  
SRR943146.111835648.2- ATCCAGCCAGTTTGGATGAAgtgagtggtggggacagccatacga  
SRR943146.18857659.1+ ATCCAGCCAGTTTGGATGAAgtgagtggtggggacagccatacga  
SRR943146.27451379.1+ ATCCAGCCAGTTTGGATGAAgtgagtggtggggacagccatacga  
SRR943146.74416486.2+ ATCCAGCCAGTTTGGATGAAgtgagtggtggggacagccatacga  
SRR943146.8831671.2+ ATCCAGCCAGTTTGGATGAAgtgagtggtggggacagccatacga  
SRR943146.99892651.2- ATCCAGCCAGTTTGGATGAAgtgagtggtggggacagccatacga  
SRR943147.53877219.2+ ATCCAGCCAGTTTGGATGAAgtgagtggtggggacagccatacga  
SRR943147.8785045.2- ATCCAGCCAGTTTGGATGAAgtgagtggtggggacagccatacga  
SRR943153.17907903.2- ATCCAGCCAGTTTGGATGAAgtgagtggtggggacagccatacga  
SRR943147.38791632.1- ATCCAGCCAGTTTGGATGAAgtgagtggtggggacagccatacga  
SRR943143.12052790.1+ ATCCAGCCAGTTTGGATGAAgtgagtggtggggacagccatacga  
SRR943143.24007821.1- ATCCAGCCAGTTTGGATGAAgtgagtggtggggacagccatacga

SRR943145.50345691.1- GCCATTTTGGATGAAGtgagtggtggggacagccatacagagatccttcttgcatt  
SRR943150.12536979.1+ CCAGTTTGGATGAAGtgagtggtggggacagccatacagagatccttcttga  
SRR943150.54616047.1+ CCAGTTTGGATGAAGtgagtggtggggacagccatacagagatccttcttga  
SRR943145.8082094.1+ CCAGTTTGGATGAAGtgagtggtggggacagccatacagagatccttcttgcatt  
SRR943143.38136470.1- CAGTTTGGATGAAGtgagtggtggggacagccatacagagatccttcttgcatt  
SRR943147.7282744.1- AGTTTGGATGAAGtgagtggtggggccagccatacagagatccttcttgcatt  
SRR943149.95711274.2- GTTTGGATGAAGtgagtggtggggacagccatacagagatccttcttgcatt  
SRR943143.9128684.1+ GTTTGGATGAAGtgagtggtggggacagccatacagagatccttcttgcatt  
SRR943143.79035346.2+ TTGGATGAAGtgagtggtggggacagccatacagagatccttcttgcatt  
SRR943146.103192666.2+ TTGGATGAAGtgagtggtggggacagccatacagagatccttcttgcatt  
SRR943143.3390929.2- TGATGAAGtgagtggtggggacagccatacagagatccttcttgcatt  
SRR943143.42964168.1+ TGATGAAGtgagtggtggggacagccatacagagatccttcttgcatt  
SRR943144.130096723.1- TGAGGAAGtgagtggtgacagccatacagagatccttcttgcatt  
SRR943149.21814629.2+ GATGAAGtgagtggtggggacagccatacagagatccttcttgcatt  
SRR943144.64588945.2+ TGAAGtgagtggtggggacagccatacagagatccttcttgcatt  
SRR943152.101429198.2- GAAgtgagtggtggggacagccatacagagatccttcttgcatt  
SRR943152.11237162.1- GAAgtgagtggtggggacagccatacagagatccttcttgcatt  
SRR943152.12196632.2- GAAgtgagtggtggggacagccatacagagatccttcttgcatt  
SRR943152.21928907.2- GAAgtgagtggtggggacagccatacagagatccttcttgcatt  
SRR943152.48151300.2- GAAgtgagtggtggggacagccatacagagatccttcttgcatt  
SRR943152.48806058.1- GAAgtgagtggtggggacagccatacagagatccttcttgcatt  
SRR943152.49173807.2- GAAgtgagtggtggggacagccatacagagatccttcttgcatt  
SRR943152.58724879.2- GAAgtgagtggtggggacagccatacagagatccttcttgcatt  
SRR943152.61620229.1- GAAgtgagtggtggggacagccatacagagatccttcttgcatt  
SRR943152.64769066.2- GAAgtgagtggtggggacagccatacagagatccttcttgcatt  
SRR943152.70954658.1- GAAgtgagtggtggggacagccatacagagatccttcttgcatt  
SRR943152.778807.2- GAAgtgagtggtggggacagccatacagagatccttcttgcatt  
SRR943152.80098221.1- GAAgtgagtggtggggacagccatacagagatccttcttgcatt  
SRR943152.8247684.1- GAAgtgagtggtggggacagccatacagagatccttcttgcatt  
SRR943152.84824452.2- GAAgtgagtggtggggacagccatacagagatccttcttgcatt  
SRR943152.87009145.1- GAAgtgagtggtggggccagccatacagagatccttcttgcatt  
SRR943152.9538714.1- GAAgtgagtggtggggacagccatacagagatccttcttgcatt  
SRR943152.98870823.2- GAAgtgagtggtggggacagccatacagagatccttcttgcatt  
SRR943148.2350091.1- Agtgagtggtggggacagccatacagagatccttcttgcatt  
SRR943148.5569000.1- Agtgagtggtggggacagccatacagagatccttcttgcatt  
SRR943148.58356454.1- Agtgagtggtggggacagccatacagagatccttcttgcatt  
SRR943148.64896133.1- Agtgagtggtggggacagccatacagagatccttcttgcatt  
SRR943149.22618660.2- Agtgagtggtggggccagccatacagagatccttcttgcatt

consensus

ATTCCAGCCAGTTTGGATGAAGtgagtggtggggacagccatacagagatccttcttgcatt

---

# W. Brown mesite (No. 49), exon 7, WGS data

- CAP3 alignment of WGS data spanning exon 1 (uppercase letters)

```
SRR959125.71349998.1- tcattgctgaaggagtaggcatttttcttttacagGTTTG
SRR959125.1164371.1- tcattgctgaaggagtaggcatttttcttttacagGTTTGAT
SRR959126.92092290.2+ tcattgctgaaggagtaggcatttttcttttacagGTTTGAT
SRR959126.64530040.1- tcattgctgaaggagtaggcatttttcttttacagGTTTGATCG
SRR959125.92615954.2+ tcattgctgaaggagtaggcatttttcttttacagGTTTGATCGACAGCTCAG
SRR959126.95115239.2+ tcattgctgaaggagtaggcatttttcttttacagGTTTGATCGACAGCTCAGG
SRR959125.3288420.1- tcattgctgaaggagtaggcatttttcttttacagGTTTGATCGACAGCTCAGGGG
SRR959125.6127856.1+ tcattgctgaaggagtaggcatttttcttttacagGTTTGATCGACAGCTCAGGGG
SRR959125.23356476.2- tcattgctgaaggagtaggcatttttcttttacagGTTTGATCGACAGCTCAGGGGTACA
SRR959125.51502940.1+ tcattgctgaaggagtaggcatttttcttttacagGTTTGATCGACAGCTCAGGGGTACA
SRR959125.66142241.1+ tcattgctgaaggagtaggcatttttcttttacagGTTTGATCGACAGCTCCGGGGTACA
SRR959125.89783208.1- tcattgctgaaggagtaggcatttttcttttacagGTTTGATCGACAGCTCAGGGGTACA
SRR959126.20383382.2+ tcattgctgaaggagtaggcatttttcttttacagGTTTGATCGACAGCTCAGGGGTACA
SRR959126.24478131.2+ tcattgctgaaggagtaggcatttttcttttacagGTTTGATCGACAGCTCAGGGGTACA
SRR959126.89114076.2- tcattgctgaaggagtaggcatttttcttttacagGTTTGATCGACAGCTCAGGGGTACA
SRR959125.3757619.1+ gctgaaggagtaggcatttttcttttacagGTTTGATCGACAGCTCAGGGGTACA
SRR959126.55740614.2+ aaggagtaggcatttttcttttacagGTTTGATCGACAGCTCAGGGGTACA
SRR959125.65657973.1+ taggcatttttcttttacagGTTTGATCGACAGCTCAGGGGTACA
SRR959125.14374764.2+ ttttcttttacagGTTTGATCGACAGCTCAGGGGTACA
SRR959125.53032334.1+ ttttcttttacagGTTTGATCGACAGCTCAGGGGGACA
SRR959125.68278836.1- ttcttttacagGTTTGATCGACAGCTCAGGGGTACA
SRR959126.5384006.2- ttacagGTTTGATCGACAGCTCAGGGGTACA
SRR959126.36334469.2+ acagGTTTGATCGACAGCTCAGGGGTACA
SRR959126.8197972.1+ acagGTTTGATCGACAGCTCAGGGGTACA
SRR959125.69939890.2- TTGATCGACAGCTCAGGGGTACA
SRR959125.87896316.1- TCGACAGCTCAGGGGTACA
SRR959125.56686998.1+ GACAGCTCAGGGGTACA
SRR959126.31869404.1- GACAGCTCAGGGGTACA
SRR959126.68690197.2+ ACAGCTCAGGGGTACA
SRR959126.82431856.2- GCTCAGGGGTACA
SRR959126.65885852.2+ CAGGGGTACA
SRR959125.20165755.1- AGGGGTACA
SRR959126.74768132.2+ AGGGGTACA
SRR959126.20088646.1+ GGGGTACA
SRR959126.54438604.2+ GGTACA
```

consensus

```
tcattgctgaaggagtaggcatttttcttttacagGTTTGATCGACAGCTCAGGGGTACA
```

```
SRR959125.51502940.1+ A
SRR959125.66142241.1+ A
SRR959126.24478131.2+ AA
SRR959126.89114076.2- AATCTA
SRR959126.20383382.2+ AATCTAAAACACTTCAGA
SRR959125.89783208.1- AATCTAAAACACTTCAGAGCTACGGAA
SRR959125.23356476.2- AATCTAAAACACTTCAGAGCTACGGAAATA
SRR959126.3757619.1- AATCTAAAACACTTCAGAGCTACGGAAATATGATGTGGGGGTTCT
SRR959126.55740614.2+ AATCTAAAACACTTCAGAGCTACGGAAATATGATGTGGGGGTTCTGCAAA
SRR959125.65657973.1+ AATCTAAAACACTTCAGAGCTACGGAAATATGATGTGGGGGTTCTGCAAA
SRR959125.14374764.2+ AATCTAAAACACTTCAGAGCTACGGAAATATGATGTGGGGGTTCTGCAAA
SRR959125.20165755.1- AATCTAAAACACTTCAGAGCTACGGAAATATGATGTGGGGGTTCTGCAAA
SRR959125.53032334.1+ AATCTAAAACACTTCAGAGCTACGGAAATATGATGTGGGGGTTCTGCAAA
SRR959125.56686998.1+ AATCTAAAACACTTCAGAGCTACGGAAATATGATGTGGGGGTTCTGCAAA
SRR959125.68278836.1- AATCTAAAACACTTCAGAGCTACGGAAATATGATGTGGGGGTTCTGCAAA
SRR959125.69939890.2- AATCTAAAACACTTCAGAGCTACGGAAATATGATGTGGGGGTTCTGCAAA
SRR959125.87896316.1- AATCTAAAACACTTCAGAGCTACGGAAATATGATGTGGGGGTTCTGCAAA
SRR959126.20088646.1+ AATCTAAAACACTTCAGAGCTACGGAAATATGATGTGGGGGTTCTGCAAA
SRR959126.31869404.1- AATCTAAAACACTTCAGAGCTACGGAAATATGATGTGGGGGTTCTGCAAA
SRR959126.36334469.2+ AATCTAAAACACTTCAGAGCTACGGAAATATGATGTGGGGGTTCTGCAAA
SRR959126.5384006.2- AATCTAAAACACTTCAGAGCTACGGAAATATGATGTGGGGGTTCTGCAAA
SRR959126.54438604.2+ AATCTAAAACACTTCAGAGCTACGGAAATATGATGTGGGGGTTCTGCAAA
SRR959126.65885852.2+ AATCTAAAACACTTCAGAGCTACGGAAATATGATGTGGGGGTTCTGCAAA
SRR959126.68690197.2+ AATCTAAAACACTTCAGAGCTACGGAAATATGATGTGGGGGTTCTGCAAA
SRR959126.74768132.2+ AATCTAAAACACTTCAGAGCTACGGAAATATGATGTGGGGGTTCTGCAAA
SRR959126.8197972.1+ AATCTAAAACACTTCAGAGCTACGGAAATATGATGTGGGGGTTCTGCAAA
SRR959126.82431856.2- AATCTAAAACACTTCAGAGCTACGGAAATATGATGTGGGGGTTCTGCAAA
SRR959126.22419777.2+ CTAAAACACTTCAGAGCTACGGAAATATGATGTGGGGGTTCTGCAAA
SRR959125.304875.1+ TAAAACACTTCAGAGCTACGGAAATATGATGTGGGGGTTCTGCAAA
SRR959126.49581060.2+ AAAACACTTCAGAGCTACGGAAATATGATGTGGGGGTTCTGCAAA
SRR959125.49130245.2- AAACGCTTCAGAGCTACGGAAATATGATGTGGGGGTTCTGCAAA
SRR959126.78363057.2+ ACACCTTCAGAGCTACGGAAATATGATGTGGGGGTTCTGCAAA
SRR959126.30956045.1- AGAGCTACGGAAATATGATGTGGGGGTTCTGCAAA
SRR959125.26644278.2+ GAGCTACGGAAATATGATGTGGGGGTTCTGCAAA
SRR959126.16912081.1- GAGCTACGGAAATATGATGTGGGGGTTCTGCAAA
SRR959126.80285931.1- GAGCTACGGAAATATGATGTGGGGGTTCTGCAAA
```



SRR959125.20973158.2+ ATCTCATGGTCTTTA  
SRR959126.8512286.1+ TCTCATGGTCTTTA  
SRR959125.63671987.2- CTCATGGTCTTTA  
SRR959126.85771875.1+ CATGGTCTTTA  
SRR959125.30512043.1- TGGTCTTTA  
SRR959125.36889549.2- TCTTTA  
SRR959125.13372985.2- TTTA  
SRR959126.17203992.2+ TTTA  
SRR959126.19663196.2- TTA  
SRR959126.67507656.1- A

consensus CACTCTCCCTGTGCATTTTCATTCTCTTTGGAGCAGTATCTACAGATCTCATGGTCTTTA

. : . : . : . : . : . :  
SRR959126.32715419.2- CAATTC  
SRR959126.34803302.1+ CAATTCAG  
SRR959126.68696902.2- CAATTCAG  
SRR959125.61297419.2+ CAATTCAGCCAG  
SRR959126.39146429.2+ CAATTCAGCCAG  
SRR959126.83495126.1- CAATTCAGCCAG  
SRR959125.557549.1+ CAATTCAGCCAGT  
SRR959126.45296095.1+ CAATTCAGCCAGTTGAT  
SRR959125.81390318.1+ CAATTCAGCCAGTTGAT  
SRR959126.17241068.2+ CAATTCAGCCAGTTGATG  
SRR959125.82224539.1+ CAATTCAGCCAGTTGATGA  
SRR959125.10854535.2+ CAATTCAGCCAGTTGATGAAg  
SRR959125.35797186.2+ CAATTCAGCCAGTTGATGAAgtgagt  
SRR959125.12611392.1+ CAATTCAGCCAGTTGATGAAgtgagt  
SRR959125.54037503.1- CAATTCAGCCAGTTGATGAAgtgagt  
SRR959125.86194665.2- CAATTCAGCCAGTTGATGAAgtgagt  
SRR959125.21450564.1- CAATTCAGCCAGTTGATGAAgtgagtgtgggaaa  
SRR959126.60824339.2- CAATTCAGCCAGTTGATGAAgtgagtgtgggaaaagac  
SRR959125.23563924.1+ CAATTCAGCCAGTTGATGAAgtgagtgtgggaaaagaca  
SRR959126.47554465.1- CAATTCAGCCAGTTGATGAAgtgagtgtgggaaaagacatg  
SRR959126.90756317.1- CAATTCAGCCAGTTGATGAAgtgagtgtgggaaaagacatgc  
SRR959125.13372985.2- CAATTCAGCCAGTTGATGAAgtgagtgtgggaaaagacatgcaaaatccttcttgatc  
SRR959125.20973158.2+ CAATTCAGCCAGTTGATGAAgtgagtgtgggaaaagacatgcaaaatccttcttgatc  
SRR959125.30512043.1- CAATTCAGCCAGTTGATGAAgtgagtgtgggaaaagacatgcaaaatccttcttgatc  
SRR959125.36889549.2- CAATTCAGCCAGTTGATGAAgtgagtgtgggaaaagacatgcaaaatccttcttgatc  
SRR959125.63671987.2- CAATTCAGCCAGTTGATGAAgtgagtgtgggaaaagacatgcaaaatccttcttgatc  
SRR959125.68714028.2- CAATTCAGCCAGTTGATGAAgtgagtgtgggaaaagacatgcaaaatccttcttgatc  
SRR959125.78110571.1- CAATTCAGCCAGTTGATGAAgtgagtgtgggaaaagacatgcaaaatccttcttgatc  
SRR959126.13996252.1+ CAATTCAGCCAGTTGATGAAgtgagtgtgggaaaagacatgcaaaatccttcttgatc  
SRR959126.14781749.1- CAATTCAGCCAGTTGATGAAgtgagtgtgggaaaagacatgcaaaatccttcttgatc  
SRR959126.17203992.2+ CAATTCAGCCAGTTGATGAAgtgagtgtgggaaaagacatgcaaaatccttcttgatc  
SRR959126.19663196.2- CAATTCAGCCAGTTGATGAAgtgagtgtgggaaaagacatgcaaaatccttcttgatc  
SRR959126.20228989.2+ CAATTCAGCCAGTTGATGAAgtgagtgtgggaaaagacatgcaaaatccttcttgatc  
SRR959126.21560744.2- CAATTCAGCCAGTTGATGAAgtgagtgtgggaaaagacatgcaaaatccttcttgatc  
SRR959126.67507656.1- CAATTCAGCCAGTTGATGAAgtgagtgtgggaaaagacatgcaaaatccttcttgatc  
SRR959126.8512286.1+ CAATTCAGCCAGTTGATGAAgtgagtgtgggaaaagacatgcaaaatccttcttgatc  
SRR959126.85771875.1+ CAATTCAGCCAGTTGATGAAgtgagtgtgggaaaagacatgcaaaatccttcttgatc  
SRR959126.91861988.2- CAATTCAGCCAGTTGATGAAgtgagtgtgggaaaagacatgcaaaatccttcttgatc  
SRR959126.97490198.2- CAATTCAGCCAGTTGATGAAgtgagtgtgggaaaagacatgcaaaatccttcttgatc  
SRR959125.20520770.1- ATTCAGCCAGTTGAAGAAgtgagtgtgggaaaagacatgcaaaatccttcttgatc  
SRR959125.66850473.1- CCAGCCAGTTGATGAAgtgagtgtgggaaaagacatgcaaaatccttcttgatc  
SRR959125.82658505.1- CCAGCCAGTTGATGAAgtgagtgtgggaaaagacatgcaaaatccttcttgatc  
SRR959125.65104421.2- CAGCCAGTTGATGAAgtgagtgtgggaaaagacatgcaaaatccttcttgatc  
SRR959125.28048419.1+ AGTTGATGAAgtgagtgtgggaaaagacatgcaaaatccttcttgatc  
SRR959126.20578648.2- TTGATGAAgtgagtgtgggaaaagacatgcaaaatccttcttgatc  
SRR959126.46510313.2+ TGATGAAgtgagtgtgggaaaagacatgcaaaatccttcttgatc  
SRR959125.79334094.2- TGAAGtgagtgtgggaaaagacatgcaaaatccttcttgatc  
SRR959126.25851395.1+ TGAAGtgagtgtgggaaaagacatgcaaaatccttcttgatc  
SRR959126.82800339.1- GAAgtgagtgtgggaaaagacatgcaaaatccttcttgatc

consensus CAATTCAGCCAGTTGATGAAgtgagtgtgggaaaagacatgcaaaatccttcttgatc

## X. Emperor penguin (No. 31), exon 8, WGS data

- CAP3 alignment of WGS data spanning exon 8 (uppercase letters)

```

      .   :   .   :   .   :   .   :   .   :
SRR1144960.13923014.1.+  tgctagactctgacctacttcaatttgaactgcagA
SRR1144986.2151361.1.+  tgctagactctgacctacttcaatttgaactgcagATG
SRR1144949.1777503.1.-  tgctagactctgacctacttcaatttgaactgcagATGA
SRR1144949.20751761.1.+  tgctagactctgacctacttcaatttgaactgcagATGA
SRR1144951.15521086.1.+  tgctagactctgacctacttcaatttgaactgcagATGA
SRR1144951.3224147.2.-  tgctagactctgacctacttcaatttgaactgcagATGAAT
SRR1144953.11953462.1.+  tgctagactctgacctacttcaatttgaactgcagATGAAT
SRR1144955.14093991.2.+  tgctagactctgacctacttcaatttgaactgcagATGAAT
SRR1144944.16983818.2.-  tgctagactctgacctacttcaatttgaactgcagATGAATG
SRR1144981.2791406.2.-  tgctagactctgacctacttcaatttgaactgcagATGAATG
SRR1144986.4276791.2.+  tgctagactctgacctacttcaatttgaactgcagATGAATG
SRR1144954.5837236.1.+  tgctagactctgacctacttcaatttgaactgcagATGAATGG
SRR1144959.11681842.1.-  tgctagactctgacctacttcaatttgaactgcagATGAATGGTTC
SRR1144961.6807750.1.+  tgctagactctgacctacttcaatttgaactgcagATGAATGGTTC
SRR1144979.832416.2.+  tgctagactctgacctacttcaatttgaactgcagATGAATCGTTCAGAT
SRR1144981.10767842.2.+  tgctagactctgacctacttcaatttgaactgcagATGAATCGTTCAGATCT
SRR1144955.12492792.2.-  tgctagactctgacctacttcaatttgaactgcagATGAATCGTTCAGATCTG
SRR1144949.13029897.1.-  tgctagactctgacctacttcaatttgaactgcagATGAATCGTTCAGATCTGCTG
SRR1144955.19250011.1.-  tgctagactctgacctacttcaatttgaactgcagATGAATCGTTCAGATCTGCTG
SRR1144978.12799072.1.-  tgctagactctgacctacttcaatttgaactgcagATGAATCGTTCAGATCTGCTG
SRR1144979.9347410.1.-  tgctagactctgacctacttcaatttgaactgcagATGAATCGTTCAGATCTGCTGGT
SRR1144943.15592673.2.+  tgctagactctgacctacttcaatttgaactgcagATGAATCGTTCAGATCTGCTGGT
SRR1144950.10041293.2.+  tgctagactctgacctacttcaatttgaactgcagATGAATCGTTCAGATCTGCTGGT
SRR1144950.9864783.1.-  tgctagactctgacctacttcaatttgaactgcagATGAATCGTTCAGATCTGCTGGT
SRR1144953.11606207.2.+  tgctagactctgacctacttcaatttgaactgcagATGAATCGTTCAGATCTGCTGGT
SRR1144953.5876551.1.-  tgctagactctgacctacttcaatttgaactgcagATGAATCGTTCAGATCTGCTGGT
SRR1144954.19381700.1.+  tgctagactctgacctacttcaatttgaactgcagATGAATCGTTCAGATCTGCTGGT
SRR1144955.6418335.2.-  tgctagactctgacctacttcaatttgaactgcagATGAATCGTTCAGATCTGCTGGT
SRR1144960.831264.1.+  tgctagactctgacctacttcaatttgaactgcagATGAATCGTTCAGATCTGCTGGT
SRR1144979.14388614.2.-  tgctagactctgacctacttcaatttgaactgcagATGAATCGTTCAGATCTGCTGGT
SRR1144979.9285614.1.-  tgctagactctgacctacttcaatttgaactgcagATGAATCGTTCAGATCTGCTGGT
SRR1144981.8694327.1.-  tgctagactctgacctacttcaatttgaactgcagATGAATCGTTCAGATCTGCTGGT
SRR1144984.20476661.2.+  tgctagactctgacctacttcaatttgaactgcagATGAATCGTTCAGATCTGCTGGT
SRR1144985.16473753.1.+  tgctagactctgacctacttcaatttgaactgcagATGAATCGTTCAGATCTGCTGGT
SRR1144985.23093154.1.+  tgctagactctgacctacttcaatttgaactgcagATGAATCGTTCAGATCTGCTGGT
SRR1144985.24362288.1.+  tgctagactctgacctacttcaatttgaactgcagATGAATCGTTCAGATCTGCTGGT
SRR1144986.30528143.1.+  tgctagactctgacctacttcaatttgaactgcagATGAATCGTTCAGATCTGCTGGT
SRR1144955.15966097.1.-  gctagactctgacctacttcaatttgaactgcagATGAATCGTTCAGATCTGCTGGT
SRR1144959.8113281.1.-  gctagactctgacctacttcaatttgaactgcagATNAATCGTTCAGATCTGCTGGT
SRR1144962.2493699.2.+  ctgactctgacctacttcaatttgaactgcagATGAATCGTTCAGATCTGCTGGT
SRR1144944.13147362.1.+  tagactctgacctacttcaatttgaactgcagATGAATCGTTCAGAT
SRR1144978.3431911.2.+  tagactctgacctacttcaatttgaactgcagATGAATCGTTCAGATCTGCTGGT
SRR1144979.7573897.1.+  tagactctgacctacttcaatttgaactgcagATGAATCGTTCAGATCTGCTGGT
SRR1144959.7597348.1.+  agactctgacctacttcaatttgaactgcagATGAATCGTTCAGATCTGCTGGT
SRR1144951.19214455.1.+  actctgactacttcaatttgaactgcagATGAATCGTTCAGATCTGCTGGT
SRR1144960.2183918.1.+  actctgactacttcaatttgaactgcagATGAATCGTTCAGATCTGCTGGT
SRR1144961.10901322.2.-  ctgactacttcaatttgaactgcagATGAATCGTTCAGATCTGCTGGT
SRR1144985.9029564.2.+  ctgactacttcaatttgaactgcagATGAATCGTTCAGATCTGCTGGT
SRR1144961.12528769.1.+  tgactacttcaatttgaactgcagATGAATCGTTCAGATCTGCTGGT
SRR1144984.2382315.1.+  tgactacttcaatttgaactgcagATGAATCGTTCAGATCTGCTGGT
SRR1144984.5946477.2.+  tgactacttcaatttgaactgcagATGAATCGTTCAGATCTGCTGGT
SRR1144959.10314728.1.-  acctacttcaatttgaactgcagATGAATCGTTCAGATCTGCTGGT
SRR1144959.15225111.1.+  acctacttcaatttgaactgcagATGAATCGTTCAGATCTGCTGGT
SRR1144986.946985.1.-  tacttcaatttgaactgcagATGAATCGTTCAGATCTGCTGGT
SRR1144944.13164233.2.+  acttcaatttgaactgcagATGAATCGTTCAGATCTGCTGGT
SRR1144950.12535980.2.-  acttcaatttgaactgcagATGAATCGTTCAGATCTGCTGGT
SRR1144986.14854237.1.-  ttcatttgaactgcagATGAATCGTTCAGATCTGCTGGT
SRR1144950.14267840.1.-  catttgaactgcagATGAATCGTTCAGATCTGCTGGT
SRR1144952.808828.2.-  catttgaactgcagATGAATCGTTCAGATCTGCTGGT
SRR1144944.5032759.1.+  ttttgaactgcagATGAATCGTTCAGATCTGCTGGT
SRR1144954.4365300.1.-  ttttgaactgcagATGAATCGTTCAGATCTGCTGGT
SRR1144986.7592756.1.+  ttgaactgcagATGAATCGTTCAGATCTGCTGGT
SRR1144942.5908603.1.-  ttgaactgcagATGAATCGTTCAGATCTGCTGGT
SRR1144961.14309819.1.+  ttgaactgcagATGAATCGTTCAGATCTGCTGGT
SRR1144950.10119445.1.+  ttgaactgcagATGAATCGTTCAGATCTGCTGGT
SRR1144981.17909752.1.-  ttgaactgcagATGAATCGTTCAGATCTGCTGGT
SRR1144950.7664044.1.-  gaactgcagATGAATCGTTCAGATCTGCTGGT
SRR1144951.17862290.2.+  gaactgcagATGAATCGTTCAGATCTGCTGGT
SRR1144953.2404569.2.+  gaactgcagATGAATCGTTCAGATCTGCTGGT
SRR1144955.17447980.1.-  gaactgcagATGAATCGTTCAGATCTGCTGGT
SRR1144961.5167825.1.-  gaactgcagATGAATCGTTCAGATCTGCTGGT
SRR1144951.13625050.1.-  aactgcagATGAATCGTTCAGATCTGCTGGT
SRR1144942.4348457.2.-  tgcagATGAATCGTTCAGATCTGCTGGT
SRR1144952.11024811.2.+  gcagATGAATCGTTCAGATCTGCTGGT
SRR1144952.294730.1.-  gcagATGAATCGTTCAGATCTGCTGGT

```

SRR1144978.1208094.1- gcagATGAATGGTTCCAGATCTGCTGGTT  
SRR1144980.13735925.2+ gcagATGAATGGTTCCAGATCTGCTGGTT  
SRR1144955.14383370.2+ cagATGAATGGTTCCAGATCTGCTGGTT  
SRR1144944.5026633.2- agATGAATGGTTCCAGATCTGCTGGTT  
SRR1144953.6056274.1- agATGAATGGTTCCAGATCTGCTGGTT  
SRR1144986.10009311.1+ gATGAATGGTTCCAGATCTGCTGGTT  
SRR1144953.4311184.2+ TGAATGGTTCCAGATCTGCTGGTT  
SRR1144984.6777508.1+ TGAATGGTTCCAGATCTGCTGGTT  
SRR1144959.11990547.1+ GAATGGTTCCAGATCTGCTGGTT  
SRR1144986.11256060.2+ GAATGGTTCCAGATCTGCTGGTT  
SRR1144986.30224193.1- GAATGTTTCCAGATCTGCTGGTT  
SRR1144951.5147936.1- ATGGTTCCAGATCTGCTGGTT  
SRR1144953.20392854.2- TGGTTCCAGATCTGCTGGTT  
SRR1144949.15295324.1+ GGTTCAGATCTGCTGGTT  
SRR1144953.20128286.1- GTTCCAGATCTGCTGGTT  
SRR1144952.1688480.2+ TTCCAGATCTGCTGGTT  
SRR1144979.14041499.2- TTCCAGATCTGCTGGTT  
SRR1144952.12650292.1- TCCAGATCTGCTGGTT  
SRR1144952.4502570.1- CCAGATCTGCTGGTT  
SRR1144985.20729273.1- CCAGATCTGCTGGTT  
SRR1144960.1967638.1+ CAGATCTGCTGGTT  
SRR1144986.24595497.2+ CAGATCTGCTGGTT  
SRR1144950.13172717.1+ AGATCTGCTGGTT  
SRR1144978.4147148.1+ AGATCTGCTGGTT  
SRR1144980.9088994.2+ GATCTGCTGGTT  
SRR1144984.20476661.1- CTGCTGGTT  
SRR1144942.10008183.1- TGCTGGTT  
SRR1144985.3128712.1- GCTGGTT  
SRR1144942.1413627.1+ TGGTT  
SRR1144949.17553424.2+ TGGTT  
SRR1144949.12686556.2- GTT  
SRR1144954.1211192.2+ GTT  
SRR1144954.20544852.1- GTT  
SRR1144959.12345339.1- TT  
SRR1144986.6788735.2- TT

consensus

tgctagactctgacctacttcatcttgaactgcagATGAATGGTTCCAGATCTGCTGGTT

SRR1144960.831264.1+ C  
SRR1144953.5876551.1- CCA  
SRR1144953.11606207.2+ CCAG  
SRR1144979.9285614.1- CCAG  
SRR1144985.16473753.1+ CCAG  
SRR1144954.19381700.1+ CCAGA  
SRR1144986.30528143.1+ CCAGA  
SRR1144979.14388614.2- CCAGAT  
SRR1144985.24362288.1+ CCAGAT  
SRR1144943.15592673.2+ CCAGATC  
SRR1144981.8694327.1- CCAGATC  
SRR1144944.5032759.1+ CCAGATCT  
SRR1144950.10041293.2+ CCAGATCTG  
SRR1144984.20476661.2+ CCAGATCTG  
SRR1144950.9864783.1- CCAGATCTGCATG  
SRR1144985.23093154.1+ CCAGATCTGCATGT  
SRR1144955.15966097.1- CCAGATCTGCATGTCT  
SRR1144959.8113281.1- CCAGATCTGCATGTCT  
SRR1144962.2493699.2+ CCAGATCTGCATGTCTT  
SRR1144978.3431911.2+ CCAGATCTGCATGTCTTT  
SRR1144979.7573897.1+ CCAGATCTGCATGTCTTTT  
SRR1144959.7597348.1+ CCAGATCTGCATGTCTTTTG  
SRR1144951.19214455.1+ CCAGATCTGCATGTCTTTTGCC  
SRR1144960.2183918.1+ CCAGATCTGCATGTCTTTTGCC  
SRR1144961.10901322.2- CCAGATCTGCATGTCTTTGCTAC  
SRR1144985.9029564.2+ CCAGATCTGCATGTCTTTGCTAC  
SRR1144961.12528769.1+ CCAGATCTGCATGTCTTTGCTACT  
SRR1144959.10314728.1- CCAGATCTGCATGTCTTTGCTACTTG  
SRR1144959.15225111.1+ CCAGATCTGCATGTCTTTGCTACTTG  
SRR1144986.946985.1- CCAGATCTGCATGTCTTTGCTACTTGCTT  
SRR1144944.13164233.2+ CCAGATCTGCATGTCTTTGCTACTTGCTT  
SRR1144950.12535980.2- CCAGATCTGCATGTCTTTGCTACTTGCTT  
SRR1144986.14854237.1- CCAGATCTGCATGTCTTTGCTACTTGCTT  
SRR1144950.14267840.1- CCAGATCTGCATGTCTTTGCTACTTGCTT  
SRR1144952.808828.2- CCAGATCTGCATGTCTTTGCTACTTGCTT  
SRR1144954.4365300.1- CCAGATCTGCATGTCTTTGCTACTTGCTT  
SRR1144951.17862290.2+ CCAGATCTGCATGTCTTTGCTACTTGCTT  
SRR1144986.7592756.1+ CCAGATCTGCATGTCTTTGCTACTTGCTT  
SRR1144942.5908603.1- CCAGATCTGCATGTCTTTACCTACTTGCTT  
SRR1144961.14309819.1+ CCAGATCTGCATGTCTTTGCTACTTGCTT  
SRR1144950.10119445.1+ CCAGATCTGCATGTCTTTGCTACTTGCTT  
SRR1144981.17909752.1- CCAGATCTGCATGTCTTTGCTACTTGCTT  
SRR1144950.7664044.1- CCAGATCTGCATGTCTTTGCTACTTGCTT  
SRR1144953.2404569.2+ CCAGATCTGCATGTCTTTGCTACTTGCTT  
SRR1144955.17447980.1- CCAGATCTGCATGTCTTTGCTACTTGCTT



SRR1144961.5167825.1- CCAGATCTGCATGTCTTTGCCTACTTGCTTCATACCCACCT  
SRR1144951.13625050.1- CCAGATCTGCATGTCTTTGCCTACTTGCTTCATACCCACCTG  
SRR1144942.4348457.2- CCAGATCTGCATGTCTTTGCCTACTTGCTTCATACCCACCTGTCT  
SRR1144952.11024811.2+ CCAGATCTGCATGTCTTTGCCTACTTGCTTCATACCCACCTGTCTG  
SRR1144952.294730.1- CCAGATCTGCATGTCTTTGCCTACTTGCTTCATACCCACCTGTCTG  
SRR1144978.1208094.1- CCAGATCTGCATGTCTTTGCCTACTTGCTTCATACCCNCCTGTCTG  
SRR1144980.13735925.2+ CCAGATCTGCATGTCTTTGCCTACTTGCTTCATACCCACCTGTCTG  
SRR1144955.14383370.2+ CCAGATCTGCATGTCTTTGCCTACTTGCTTCATACCCACCTGTCTGG  
SRR1144986.11256060.2+ CCAGATCTGCATGTCTTTGCCTACTTGCTTCATACCCACCTGTCTGG  
SRR1144944.5026633.2- CCAGATCTGCATGTCTTTGCCTACTTGCTTCATACCCACCTGTCTGGC  
SRR1144953.6056274.1- CCAGATCTGCATGTCTTTGCCTACTTGCTTCATACCCACCTGTCTGGC  
SRR1144986.10009311.1+ CCAGATCTGCATGTCTTTGCCTACTTGCTTCATACCCACCTGTCTGGCA  
SRR1144984.2382315.1+ CCAGATCTGCATGTCTTTGCCTACTTGCTTCATACCCACCTGTCTGGCAG  
SRR1144984.5946477.2+ CCAGATCTGCATGTCTTTGCCTACTTGCTTCATACCCACCTGTCTGGCAG  
SRR1144953.4311184.2+ CCAGATCTGCATGTCTTTGCCTACTTGCTTCATACCCACCTGTCTGGCAGA  
SRR1144959.11990547.1+ CCAGATCTGCATGTCTTTGCCTACTTGCTTCATACCCACCTGTCTGGCAGAG  
SRR1144986.30224193.1- CCAGATCTGCATGTCTTTGCCTACTTGCTTCATACCCACCTGTCTGGCAGAG  
SRR1144951.5147936.1- CCAGATCTGCATGTCTTTGCCTACTTGCTTCATACCCACCTGTCTGGCAGAGGA  
SRR1144953.20392854.2- CCAGATCTGCATGTCTTTGCCTACTTGCTTCATACCCACCTGTCTGGCAGAGGAG  
SRR1144949.15295324.1+ CCAGATCTGCATGTCTTTGCCTACTTGCTTCATACCCACCTGTCTGGCAGAGGAGT  
SRR1144953.20128286.1- CCAGATCTGCATGNCCTTTGCCTACTTGCTTCATACCCGCCTGTCTGGCAGAGGAGTG  
SRR1144952.1688480.2+ CCAGATCTGCATGTCTTTGCCTACTTGCTTCATACCCACCTGTCTGGCAGAGGAGTGA  
SRR1144979.14041499.2- CCAGATCTGCATGTCTTTGCCTACTTGCTTCATACCCACCTGTCTGGCAGAGGAGTGA  
SRR1144952.12650292.1- CCAGATCTGCATGTCTTTGCCTACTTGCTTCATACCCACCTGTCTGGCAGAGGAGTGA  
SRR1144942.10008183.1- CCAGATCTGCATGTCTTTGCCTACTTGCTTCATACCCACCTGTCTGGCAGAGGAGTGAA  
SRR1144942.1413627.1+ CCAGATCTGCATGTCTTTGCCTACTTGCTTCATACCCACCTGTCTGGCAGAGGAGTGAA  
SRR1144943.15756235.2- CCAGATCTGCATGTCTTTGCCTACTTGCTTCATACCCACCTGTCTGGCAGAGGAGTGAA  
SRR1144949.12686556.2- CCAGATCTGCATGTCTTTGCCTACTTGCTTCATACCCACCTGTCTGGCAGAGGAGTGAA  
SRR1144949.17553424.2+ CCAGATCTGCATGTCTTTGCCTACTTGCTTCATACCCACCTGTCTGGCAGAGGAGTGAA  
SRR1144950.13172717.1+ CCAGATCTGCATGTCTTTGCCTACTTGCTTCATACCCACCTGTCTGGCAGAGGAGTGAA  
SRR1144952.4502570.1- CCAGATCTGCATGTCTTTGCCTACTTGCTTCATACCCACCTGTCTGGCAGAGGAGTGAA  
SRR1144954.1211192.2+ CCAGATCTGCATGTCTTTGCCTACTTGCTTCATACCCACCTGTCTGGCAGAGGAGTGAA  
SRR1144954.20544852.1- CCAGATCTGCATGTCTTTGCCTACTTGCTTCATACCCACCTGTCTGGCAGAGGAGTGAA  
SRR1144959.12345339.1- CCAGATCTGCATGTCTTTGCCTACTTGCTTCATACCCACCTGTCTGGCAGAGGAGTGAA  
SRR1144960.1967638.1+ CCAGATCTGCATGTCTTTGCCTACTTGCTTCATACCCACCTGTCTGGCAGAGGAGTGAA  
SRR1144978.4147148.1+ CCAGATCTGCATGTCTTTGCCTACTTGCTTCATACCCACCTGTCTGGCAGAGGAGTGAA  
SRR1144980.9088994.2+ CCAGATCTGCATGTCTTTGCCTACTTGCTTCATACCCACCTGTCTGGCAGAGGAGTGAA  
SRR1144984.20476661.1- CCAGATCTGCATGTCTTTGCCTACTTGCTTCATACCCACCTGTCTGGCAGAGGAGTGAA  
SRR1144984.6777508.1+ CCAGATCTGCATGTCTTTGCCTACTTGCTTCATACCCACCTGTCTGGCAGAGGAGTGAA  
SRR1144985.20729273.1- CCAGATCTGCATGTCTTTGCCTACTTGCTTCATACCCACCTGTCTGGCAGAGGAGTGAA  
SRR1144985.3128712.1- CCAGATCTGCATGTCTTTGCCTACTTGCTTCATACCCACCTGTCTGGCAGAGGAGTGAA  
SRR1144986.24595497.2+ CCAGATCTGCATGTCTTTGCCTACTTGCTTCATACCCACCTGTCTGGCAGAGGAGTGAA  
SRR1144986.6788735.2- CCAGATCTGCATGTCTTTGCCTACTTGCTTCATACCCACCTGTCTGGCAGAGGAGTGAA  
SRR1144954.7640918.1- CCAGATCTGCATGTCTTTGCCTACTTGCTTCATACCCACCTGTCTGGCAGAGGAGTGAA  
SRR1144950.2194951.2- AGATCTGCATGTCTTTGCCTACTTGCTTCATACCCACCTGTCTGGCAGAGGAGTGAA  
SRR1144986.21986740.2+ ATCTGCATGTCTTTGCCTACTTGCTTCATACCCACCTGTCTGGCAGAGGAGTGAA  
SRR1144943.916024.1+ TCTGCATGTCTTTGCCTACTTGCTTCATACCCACCTGTCTGGCAG  
SRR1144951.9576764.1+ CTGCATGTCTTTGCCTACTTGCTTCATACCCACCTGTCTGGCAGAGGAGTGAA  
SRR1144985.12647838.1+ TGCATGTCTTTGCCTACTTGCTTCATACCCACCTGTCTGGCAGAGGAGTGAA  
SRR1144984.20427578.1+ GCATGTCTTTGCCTACTTGCTTCATACCCACCTGTCTGGCAGAGGAGTGAA  
SRR1144961.2641769.1+ CATGTCTTTGCCTACTTGCTTCATACCCACCTGTCTGGCAGAGGAGTGAA  
SRR1144962.3029055.1- GTCTTTGCCTACTTGCTTCATACCCACCTGTCTGGCAGAGGAGTGAA  
SRR1144961.4388119.1- TCTTTGCCTACTTGCTTCATACCCACCTGTCTGGCAGAGGAGTGAA  
SRR1144986.2151361.2- CTTTGCCTACTTGCTTCATACCCACCTGTCTGGCAGAGGAGTGAA  
SRR1144960.12078624.2+ TTTGCCTACTTGCTTCATACCCACCTGTCTGGCAGAGGAGTGAA  
SRR1144961.12963979.2- TTGCCTACTTGCTTCATACCCACCTGTCTGGCAGAGGAGTGAA  
SRR1144986.4901780.2+ TTGCCTACTTGCTTCATACCCACCTGTCTGGCAGAGGAGTGAA  
SRR1144953.18905485.1+ TGCTACTTGCTTCATACCCACCTGTCTGGCAGAGGAGTGAA  
SRR1144984.2382315.2- TGCTACTTGCTTCATACCCACCTGTCTGGCAGAGGAGTGAA  
SRR1144986.4276791.1- CCTACTTGCTTCATACCCACCTGTCTGGCAGAGGAGTGAA  
SRR1144978.18364459.1- CTACTTGCTTCATACCCACCTGTCTGGCAGAGGAGTGAA  
SRR1144952.11028386.1- ACTTGCTTCATACCCACCTGTCTGGCAGAGGAGTGAA  
SRR1144955.13320235.1+ GCTTCATACCCACCTGTCTGGCAGAGGAGTGAA  
SRR1144960.14781519.1+ GCTTCATACCCACCTGTCTGGCAGAGGAGTGAA  
SRR1144986.4116432.2- GCTTCATACCCACCTGTCTGGCAGAGGAGTGAA  
SRR1144953.16539711.2+ CTTTCATACCCACCTGTCTGGCAGAGGAGTGAA  
SRR1144943.7682877.2+ TTCATACCCACCTGTCTGGCAGAGGAGTGAA  
SRR1144985.24362288.2- TTCATCCACCTGTCTGGCAGAGGAGTGAA  
SRR1144978.11779193.1- TCATACCCACCTGTCTGGCAGAGGAGTGAA  
SRR1144955.5461379.2+ CATACCCACCTGTCTGGCAGAGGAGTGAA  
SRR1144981.9904262.2+ TACCCACCTGTCTGGCAGAGGAGTGAA  
SRR1144984.5946477.1- TACCCACCTGTCTGGCAGAGGAGTGAA  
SRR1144985.16473753.2- TACCCGCCTGTCTGGCAGAGGAGTGAA  
SRR1144953.4488829.1- CCCACCTGTCTGGCAGAGGAGTGAA  
SRR1144960.14407896.1+ TGTCTGGCAGAGGAGTGAA  
SRR1144951.20015101.2+ GTCTGGCAGAGGAGTGAA  
SRR1144985.23093154.2- GTCTGGCAGAGGAGTGAA  
SRR1144942.427743.2- CTGGCAGAGGAGTGAA  
SRR1144954.1318563.1- CTGGCAGAGGAGTGAA  
SRR1144954.18593551.1- CTGGCAGAGGAGTGAA  
SRR1144955.2259421.1+ CTGGCAGAGGAGTGAA  
SRR1144978.1645512.1- CTGGCAGAGGAGTGAA  
SRR1144952.1093801.1+ TGGCAGAGGAGTGAA  
SRR1144952.16594577.1- TGGCAGAGGAGTGAA



SRR1144955.10939512.1+ GCTGCTCAATACCGgtaagagaagcaaactcggtattgctgcctatgccacaggatcagt  
SRR1144959.12415981.2- GCTGCTCAATACCGgtaagagaagcaaactcggtattgctgcctatgccacaggatcagt  
SRR1144959.13474460.2- GCTGCTCAATACCGgtaagagaagcaaactcggtattgctgcctatgccacaggatcagt  
SRR1144962.13686535.2- GCTGCTCAATACCGgtaagagaagcaaactcggtattgctgcctatgccacaggatcagt  
SRR1144984.15024852.1+ GCTGCTCAATACCGgtaagagaagcaaactcggtattgctgcctatgccacaggatcagt  
SRR1144984.5946477.1- GCTGCTCAATACCGgtaagagaagcaaactcggtattgctgcctatgccacaggatcagt  
SRR1144985.9029564.1- GCTGCTCAATACCGgtaagagaagcaaactcggtattgctgcctatgccacaggatcagt  
SRR1144986.12084781.1- GCTGCTCAATACCGgtaagagaagcaaactcggtattgctgcctatgccacaggatcagt  
SRR1144986.13072712.1+ GCTGCTCAATACCGgtaagagaagcaaactcggtattgctgcctatgccacaggatcagt  
SRR1144986.13351284.1+ GCTGCTCAATACCGgtaagagaagcaaactcggtattgctgcctatgccacaggatcagt  
SRR1144986.30528143.2- GCTGCTCAATACCGgtaagagaagcaaactcggtattgctgcctatgccacaggatcagt  
SRR1144980.13646827.2+ CTGCTCAATACCGgtaagagaagcaaactcggtattgctgcctatgccacaggaacagt  
SRR1144959.15046561.1+ GCTCAATACCGgtaagagaagcaaactcggtattgctgcctatgccacaggatcagt

consensus

GCTGCTCAATACCGgtaagagaagcaaactcggtattgctgcctatgccacaggatcagt

---

# Y. Adelle penguin (No. 32), exon 8, WGS data

- CAP3 alignment of WGS data spanning exon 8 (uppercase letters)

```

      .   :   .   :   .   :   .   :   .   :
SRR1144993.41032305.2- tctgactgccagactctgacctacttcattttgaaactgcagATGAATGGGATGCTGGTTC
SRR1144993.41032429.2- tctgactgccagactctgacctacttcattttgaaactgcagATGAATGGGATGCTGGTTC
SRR1144994.61072887.1- tctgactgccagactctgacctacttcattttgaaactgcagATGAATGGGATGCTGGTTC
SRR1144999.18884048.1- cctgactgccagactctgacctacttcattttgaaactgcagATGAATGGGATGCTGGTTC
SRR1145000.15292017.2+ tctgactgccagactctgacctacttcattttgaaactgcagATGAATGGGATGCTGGTTC
SRR1145000.36401457.2+ tctgactgccagactctgacctacttcattttgaaactgcagATGAATGGGATGCTGGTTC
SRR1145004.65320437.2- tctgactgccagactctgacctacttcattttgaaactgcagATGAATGGGATGCTGGTTC
SRR1145006.26110484.2+ tctgactgccagactctgacctacttcattttgaaactgcagATGAATGGGATGCTGGTTC
SRR1145006.67318459.1- tctgactgccagactctgacctacttcattttgaaactgcagATGAATGGGATGCTGGTTC
SRR1145006.74715836.2+ tctgactgccagactctgacctacttcattttgaaactgcagATGAATGGGATGCTGGTTC
SRR1145007.14404671.1+ tctgactgccagactctgacctacttcattttgaaactgcagATGAATGGGATGCTGGTTC
SRR1145006.42050412.2+ tctgactgccagactctgacctacttcattttgaaactgcagATGAATGGGATGCTGGTTC
SRR1145001.32505101.2+   tgactgccagactctgacctacttcattttgaaactgcagATGAATGGGA
SRR1144993.9495205.2-   tgactgccagactctgacctacttcattttgaaactgcagATGAATGGGATGCTGGTTC
SRR1144993.9495317.2-   tgactgccagactctgacctacttcattttgaaactgcagATGAATGGGATGCTGGTTC
SRR1144996.48719847.2-   tgactgccagactctgacctacttcattttgaaactgcagATGAATGGGATGCTGGTTC
SRR1145000.28065454.2+   tgactgccagactctgacctacttcattttgaaactgcagATGAATGGGATGCTGGTTC
SRR1145000.44688266.2+   tgactgccagactctgacctacttcattttgaaactgcagATGAATGGGATGCTGGTTC
SRR1145007.35693248.2-   tgactgccagactctgacctacttcattttgaaactgcagATGAATGGGATGCTGGTTC
SRR1145004.57031222.1+   gactgccagactctgacctacttcattttgaaactgcagATGAATGGGATGCTGGTTC
SRR1144993.53904505.1-   ctgccagactctgacctacttcattttgaaactgcagATGAATGGGATGCTGGTTC
SRR1144993.53904608.1-   ctgccagactctgacctacttcattttgaaactgcagATGAATGGGATGCTGGTTC
SRR1144995.19363583.2-   tggcagactctgacctacttcattttgaaactgcagATGAATGGGATGCTGGTTC
SRR1145006.2891410.2-   tggcagactctgacctacttcattttgaaactgcagATGAATGGGATGCTGGTTC
SRR1144996.11717603.1-   ccagactctgacctacttcattttgaaactgcagATGAATGGGATGCTGGTTC
SRR1144996.2678411.1+   ccagactctgacctacttcattttgaaactgcagATGAATGGGATGCTGGTTC
SRR1144996.2678522.1+   ccagactctgacctacttcattttgaaactgcagATGAATGGGATGCTGGTTC
SRR1145001.5099178.2-   cagactctgacctacttcattttgaaactgcagATGAATGGGATGCTGGTTC
SRR1145007.73416802.2-   cagactctgacctacttcattttgaaactgcagATGAATGGGATGCTGGTTC
SRR1144993.13151284.2+   agactctgacctacttcattttgaaactgcagATGAATGGGATGCTGGATTC
SRR1144993.13151419.2+   agactctgacctacttcattttgaaactgcagATGAATGGGATGCTGGTTC
SRR1144996.15468538.2+   gactctgacctacttcattttgaaactgcagATGAATGGGATGCTGGTTG
SRR1145000.30498291.1+   gactctgacctacttcattttgaaactgcagATGAATGGGATGCTGGTTC
SRR1145007.57624437.1+   actctgacctacttcattttgaaactgcagATGAATGGGATGCTGGTTC
SRR1145000.65355946.2+   ctctgacctacttcattttgaaactgcagATGAATGGGATGCTGGTTC
SRR1145001.24919820.2-   ctctgacctacttcattttgaaactgcagATGAATGGGATGCTGGTTC
SRR1145001.6927421.2-   ctctgacctacttcattttgaaactgcagATGAATGGGATGCTGGTTC
SRR1144995.2415275.1-   ctgacctacttcattttgaaactgcagATGAATGGGATGCTGGTTC
SRR1145005.42026519.2-   ctgacctacttcattttgaaactgcagATGAATGGGATGCTGGTTC
SRR1145001.72192711.2+   tacttcattttgaaactgcagATGAATGGGATGCTGGTTC
SRR1144993.38026379.2-   ttcattttgaaactgcagATGAATGGGATGCTGGTTC
SRR1145005.56580374.2+   ttcattttgaaactgcagATGAATGGGATGCTGGTTC
SRR1145005.61551283.2-   ttttgaactgcagATGAATGGGATGCTGGTTC
SRR1145005.8349381.2-   ttgaaactgcagATGAATGGGATGCTGGTTC
SRR1144994.17876275.1-   gaactgcagATGAATGGGATGCTGGTTC
SRR1144999.66900124.2+   gaactgcagATGAATGGGATGCTGGTTC
SRR1145004.66225478.1+   gaactgcagATGAATGGGATGCTGGTTC
SRR1145006.40154970.2-   gcagATGAATGGGATGCTGGTTC
SRR1144995.3469204.2+   cagATGAATGGGATGCTGGTTC
SRR1144998.14176477.1-   cagATGAATGGGATGCTGGTTC
SRR1144998.25117498.1-   cagATGAATGGGATGCTGGTTC
SRR1144998.46615232.1-   cagATGAATGGGATGCTGGTTC
SRR1144998.5699235.1-   cagATGAATGGGATGCTGGTTC
SRR1145006.55037379.1-   gatGAATGGGATGCTGGTTC
SRR1145005.34981199.2+   GAATGGGATGCTGGTTC
SRR1144993.907700.2+   ATGGGATGCTGGTTC
SRR1144993.907701.2+   ATGGGATGCTGGTTC
SRR1144998.21120878.2+   ATGGGATGCTGGTTC
SRR1144998.27961014.2+   ATGGGATGCTGGTTC
SRR1144998.28625040.2+   ATGGGATGCTGGTTC
SRR1144998.4243211.2+   ATGGGATGCTGGTTC
SRR1144998.47686489.2+   ATGGGATGCTGGTTC
SRR1145007.42050412.1-   GATGCTGGTTC
SRR1144993.3886278.2+   ATGCTGGTTC
SRR1144998.67085243.2+   ATGCTGGTTC
SRR1145000.19173285.2+   ATGCTGGTTC
SRR1145004.29072333.2+   GCTGGTTC
SRR1144994.57031222.2-   CTGGTTC
SRR1144994.13223558.2+   TGGTTC
SRR1144999.13344253.2-   GTTC
SRR1145006.22933790.2+   GTTC
SRR1145006.24052151.2+   TC

```

consensus

tctgactgccagactctgacctacttcattttgaaactgcagATGAATGGGATGCTGGTTC

SRR1145001.24919820.2- CA  
SRR1145001.6927421.2- CA  
SRR1145000.28065454.2+ CAGA  
SRR1145000.44688266.2+ CAGA  
SRR1145001.72192711.2+ CAGATCTGCA  
SRR1145000.65355946.2+ CAGATCTGCAT  
SRR1144993.41032305.2- CAGATCTGCATGTCTTTTTG  
SRR1144993.41032429.2- CAGATCTGCATGTCTTTTTG  
SRR1144999.18884048.1- CAGATCTGCATGTCTTTTTG  
SRR1145007.14404671.1+ CAGATCTGCATGTCTTTTTG  
SRR1145000.36401457.2+ CAGATCTGCATGTCTTTTTG  
SRR1145006.74715836.2+ CAGATCTGCATGTCTTTTTG  
SRR1145006.26110484.2+ CAGATCTGCATGTCTTTTTG  
SRR1144994.61072887.1- CAGATCTGCATGTCTTTTTG  
SRR1145000.15292017.2+ CAGATCTGCATGTCTTTTTG  
SRR1145006.67318459.1- CAGATCTGCATGTCTTTTTG  
SRR1145004.65320437.2- CAGATCTGCATGTCTTTTTG  
SRR1145007.42050412.2+ CAGATCTGCATGTCTTTTTG  
SRR1145000.30498291.1+ CAGATCTGCATGTCTTTTTG  
SRR1144993.9495205.2- CAGATCTGCATGTCTTTTTG  
SRR1144993.9495317.2- CAGATCTGCATGTCTTTTTG  
SRR1144996.11717603.1- CAGATCTGCATGTCTTTTTG  
SRR1144996.48719847.2- CAGATCTGCATGTCTTTTTG  
SRR1145007.35693248.2- CAGATCTGCATGTCTTTTTG  
SRR1144994.57031222.1+ CAGATCTGCATGTCTTTTTG  
SRR1144999.13344253.2- CAGATCTGCATGTCTTTTTG  
SRR1144993.53904505.1- CAGATCTGCATGTCTTTTTG  
SRR1144993.53904608.1- CAGATCTGCATGTCTTTTTG  
SRR1144995.19363583.2- CAGATCTGCATGTCTTTTTG  
SRR1145006.2891410.2- CAGATCTGCATGTCTTTTTG  
SRR1144996.15468538.2+ CAGATCTGCATGTCTTTTTG  
SRR1144996.2678411.1+ CAGATCTGCATGTCTTTTTG  
SRR1144996.2678522.1+ CAGATCTGCATGTCTTTTTG  
SRR1144993.13151284.2+ CAGATCTGCATGTCTTTTTG  
SRR1145007.73416802.2- CAGATCTGCATGTCTTTTTG  
SRR1144993.13151419.2+ CAGATCTGCATGTCTTTTTG  
SRR1145007.57624437.1+ CAGATCTGCATGTCTTTTTG  
SRR1144995.2415275.1- CAGATCTGCATGTCTTTTTG  
SRR1145005.42026519.2- CAGATCTGCATGTCTTTTTG  
SRR1144993.38026379.2- CAGATCTGCATGTCTTTTTG  
SRR1144993.3886278.2+ CAGATCTGCATGTCTTTTTG  
SRR1144993.907700.2+ CAGATCTGCATGTCTTTTTG  
SRR1144993.907701.2+ CAGATCTGCATGTCTTTTTG  
SRR1144994.13223558.2+ CAGATCTGCATGTCTTTTTG  
SRR1144994.17876275.1- CAGATCTGCATGTCTTTTTG  
SRR1144994.57031222.2- CAGATCTGCATGTCTTTTTG  
SRR1144995.3469204.2+ CAGATCTGCATGTCTTTTTG  
SRR1144998.14176477.1- CAGATCTGCATGTCTTTTTG  
SRR1144998.21120878.2+ CAGATCTGCATGTCTTTTTG  
SRR1144998.25117498.1- CAGATCTGCATGTCTTTTTG  
SRR1144998.27961014.2+ CAGATCTGCATGTCTTTTTG  
SRR1144998.28625040.2+ CAGATCTGCATGTCTTTTTG  
SRR1144998.4243211.2+ CAGATCTGCATGTCTTTTTG  
SRR1144998.46615232.1- CAGATCTGCATGTCTTTTTG  
SRR1144998.47686489.2+ CAGATCTGCATGTCTTTTTG  
SRR1144998.5699235.1- CAGATCTGCATGTCTTTTTG  
SRR1144998.67085243.2+ CAGATCTGCATGTCTTTTTG  
SRR1144999.66900124.2+ CAGATCTGCATGTCTTTTTG  
SRR1145000.19173285.2+ CAGATCTGCATGTCTTTTTG  
SRR1145004.29072333.2+ CAGATCTGCATGTCTTTTTG  
SRR1145004.66225478.1+ CAGATCTGCATGTCTTTTTG  
SRR1145005.34981199.2+ CAGATCTGCATGTCTTTTTG  
SRR1145005.56580374.2+ CAGATCTGCATGTCTTTTTG  
SRR1145005.61551283.2- CAGATCTGCATGTCTTTTTG  
SRR1145005.8349381.2- CAGATCTGCATGTCTTTTTG  
SRR1145006.22933790.2+ CAGATCTGCATGTCTTTTTG  
SRR1145006.24052151.2+ CAGATCTGCATGTCTTTTTG  
SRR1145006.40154970.2- CAGATCTGCATGTCTTTTTG  
SRR1145006.55037379.1- CAGATCTGCATGTCTTTTTG  
SRR1145007.14404671.2- CAGATCTGCATGTCTTTTTG  
SRR1145007.42050412.1- CAGATCTGCATGTCTTTTTG  
SRR1145007.61371462.1+ CAGATCTGCATGTCTTTTTG  
SRR1145007.70295917.1+ CAGATCTGCATGTCTTTTTG  
SRR1144992.12221089.1- AGATCTGCATGTCTTTTTG  
SRR1144994.57368222.1+ AGATCTGCATGTCTTTTTG  
SRR1145000.54741017.2- GATCTGCATGTCTTTTTG  
SRR1144992.19974964.2- TCTGCATGTCTTTTTG  
SRR1145006.31618019.2+ CTGCATGTCTTTTTG  
SRR1145001.24516344.2+ GCATGTCTTTTTG  
SRR1145006.74715836.1- TGCTTTTTG  
SRR1144992.23918808.1- CTTTG  
SRR1145006.26110484.1- TTTTG  
SRR1145001.23809804.1- CCTACT

SRR1144996.61276135.1+ CTACTTGCTTCATACCCACCTGTCTGGCAGAGGAGTGAA  
SRR1144999.53460561.1+ CTACTTGCTTCATACCCACCTGTCTGGCAGAGGAGTGAA  
SRR1145005.30784500.2- CTACTTGCTTCATACCCACCTGTCTGGCAGAGGAGTGAA  
SRR1145000.38165410.2+ ACTTGCTTCATACCCACCTGTCTGGCAGAGGAGTGAA  
SRR1144994.59134451.1+ TTGCTTCATACCCACCTGTCTGGCAGAGGAGTGAA  
SRR1145007.7024762.1+ GCTTCATACCCACCTGTCTGGCAGAGGAGTGAA  
SRR1145001.39751305.1- CTTTCATACCCACCTGTCTGGCAGAGGAGTGAA  
SRR1145006.67445686.2+ CTTTCATACCCACCTGTCTGGCAGAGGAGTGAA  
SRR1144992.46345616.1+ TTCATACCCACCTGTCTGGCAGAGGAGTGAA  
SRR1144992.46345726.1+ TTCATACCCACCTGTCTGGCAGAGGAGTGAA  
SRR1145000.11168659.2+ TCATACCCACCTGTCTGGCAGAGGAGTGAA  
SRR1145004.51056166.1+ TCATACCCACCTGTCTGGCAGAGGAGTGAA  
SRR1145000.46913317.1+ CATACCCACCTGTCTGGCAGAGGAGTGAA  
SRR1145007.57624437.2- TCCCCACCTGTCTGGCAGAGGAGTGAA  
SRR1144993.17373707.2- ACCCACCTGTCTGGCAGAGGAGTGAA  
SRR1144999.24418686.1- CCCACCTGTCTGGCAGAGGAGTGAA  
SRR1144999.46976359.1+ CCCACCTGTCTGGCAGAGGAGTGAA  
SRR1144999.48121990.2+ CCCACCTGTCTGGCAGAGGAGTGAA  
SRR1145001.47766651.2- CCACCTGTCTGGCAGAGGAGTGAA  
SRR1145004.72961567.1+ CCACCTGTCTGGCAGAGGAGTGAA  
SRR1144999.60728096.2+ CACCTGTCTGGCAGAGGAGTGAA  
SRR1144995.8791417.1+ ACCTGTCTGGCAGAGGAGTGAA  
SRR1145001.48505232.2+ ACCTGTCTGGCAGAGGAGTGAA  
SRR1144995.3469204.1- CTGTCTGGCAGAGGAGTGAA  
SRR1144994.11187747.2+ GTCTGGCAGAGGAGTGAA  
SRR1145004.66225478.2- GTCTGGCAGAGGAGTGAA  
SRR1144996.47207117.1- GGCAGAGGAGTGAA  
SRR1144999.23114265.1- CAGAGGAGTGAA  
SRR1144999.23114265.2+ CAGAGGAGTGAA  
SRR1145000.11328614.1+ CAGAGGAGTGAA  
SRR1145004.25442647.1- AGAGGAGTGAA  
SRR1145005.18474681.2+ GAGGAGTGAA  
SRR1145001.53473888.2- TGAA  
SRR1145001.53473889.2- TGAA  
SRR1145004.19102511.2+ AA  
SRR1144996.39150053.2+ A

consensus

CAGATCTGCATGTCTTTTGGCTACTTGCTTCATACCCACCTGTCTGGCAGAGGAGTGAA

SRR1145005.34981199.2+ A  
SRR1144998.4243211.2+ AG  
SRR1144999.66900124.2+ AG  
SRR1144993.38026379.2- AGCT  
SRR1145005.56580374.2+ AGCT  
SRR1144998.14176477.1- AGCTGCTC  
SRR1144998.25117498.1- AGCTGCTC  
SRR1144998.46615232.1- AGCTGCTC  
SRR1144998.5699235.1- AGCTGCTC  
SRR1145005.61551283.2- AGCTGCTC  
SRR1145001.23809804.1- AGCTGCTCA  
SRR1144998.28625040.2+ AGCTGGTCAA  
SRR1145005.8349381.2- AGCTGCTCAA  
SRR1144996.61276135.1+ CGCTGCTCAAT  
SRR1144994.17876275.1- AGCTGCTCAATA  
SRR1144998.21120878.2+ AGCTGCTCAATA  
SRR1145004.66225478.1+ AGCTGCTCAATA  
SRR1144998.27961014.2+ AGCTGCTCAATAC  
SRR1144998.47686489.2+ AGGTGCTCAATACC  
SRR1144993.3886278.2+ AGCTGCTCAATACCGg  
SRR1145001.39751305.1- AGCTGCTCAATACCGgt  
SRR1145006.40154970.2- AGCTGCTCAATACCGgt  
SRR1144995.3469204.2+ AGCTGCTCAATACCGgta  
SRR1145000.54741017.2- AGCTGCTCAATACCGgta  
SRR1144998.67085243.2+ AGCTGCTCAATACCGgtaag  
SRR1145000.19173285.2+ AGCTGCTCAATACCGgtaag  
SRR1145006.55037379.1- AGCTGCTCAATACCGgtaag  
SRR1144993.907700.2+ AGCTGCTCAATACCGggaagag  
SRR1144993.907701.2+ AGCTGCTCAATACCGgtaagagagag  
SRR1145001.47766651.2- AGCTGCTCAATACCGgtaagagagagca  
SRR1145001.48505232.2+ AGCTGCTCAATACCGgtaagagagagcaaa  
SRR1145007.42050412.1- AGCTGCTCAATACCGgtaagagagagcaaaact  
SRR1144999.46976359.1+ AGCTGCTCAATACCGgtaagagagagcaaaactc  
SRR1144999.48121990.2+ AGCTGCTCAATACCGgtaagagagagcaaaactc  
SRR1145004.29072333.2+ AGCTGCTCAATACCGgtaagagagagcaaaactca  
SRR1144994.57031222.2- AGCTGCTCAATACCGgtaagagagagcaaaactca  
SRR1145006.24052151.2+ AGCTGCTCAATACCGgtaagagagagcaaaactcat  
SRR1144994.13223558.2+ AGCTGCTCAATACCGgtaagagagagcaaaactcatag  
SRR1144999.23114265.2+ AGCTGCTCAATACCGgtaagagagagcaaaactcatag  
SRR1145006.22933790.2+ AGCTGCTCAATACCGgtaagagagagcaaaactcatagtgt  
SRR1145007.14404671.2- AGCTGCTCAATACCGgtaagagagagcaaaactcatagtgt  
SRR1145007.61371462.1+ AGCTGCTCAATACCGgtaagagagagcaaaactcatagtgt  
SRR1145007.70295917.1+ AGCTGCTCAATACCGgtaagagagagcaaaactcatagtgt  
SRR1144992.12221089.1- AGCTGCTCAATACCGgtaagagagagcaaaactcatagtgtg

SRR1144994.57368222.1+ AGCTGCTCAATACCGgtaagagaagcaaaactcatagtgttg  
SRR1144992.19974964.2- AGCTGCTCAATACCGgtaagagaagcaaaactcatagtgttgctg  
SRR1145001.53473888.2- AGCTGCTCAATACCGgtaagagaagcaaaactcatagtgttgctg  
SRR1145001.53473889.2- AGCTGCTCAATACCGgtaagagaagcaaaactcatagtgttgctg  
SRR1145006.31618019.2+ AGCTGCTCAATACCGgtaagagaagcaaaactcctagtgttgctg  
SRR1145006.74715836.1- AGCTGCTCAATACCGgtaagagaagcaaaactcatagtgttgctgcctatg  
SRR1144999.53460561.1+ AGCTGCTCAATACCGgtaagagaagcaaaactcatagtattgctgcctatg  
SRR1145000.38165410.2+ AGCTGCTCAATACCGgtaagagaagcaaaactcatagtattgctgcctatgcca  
SRR1144992.23918808.1- AGCTGCTCAATACCGgtaagagaagcaaaactcatagtgttgctgcctatgccaca  
SRR1145006.26110484.1- AGCTGCTCAATACCGgtaagagaagcaaaactcatagtgttgctgcctatgccaca  
SRR1144992.46345616.1+ AGCTGCTCAATACCGgtaagagaagcaaaactcatagtgttgctgcctatgccacaggatc  
SRR1144992.46345726.1+ AGCTGCTCAATACCGgtaagagaagcaaaactcatagtgttgctgcctatgccacaggatc  
SRR1144993.17373707.2- AGCTGCTCAATACCGgtaagagaagcaaaactcatagtgttgctgcctatgccacaggatc  
SRR1144994.11187747.2+ AGCTGCTCAATACCGgtaagagaagcaaaactcatagtgttgctgcctatgccacaggatc  
SRR1144994.59134451.1+ AGCTGCTCAATACCGgtaagagaagcaaaactcatggtgttgctgcccacaggatc  
SRR1144995.3469204.1- AGCTGCTCAATACCGgtaagagaagcaaaactcatagtgttgctgcctatgccacaggatc  
SRR1144995.8791417.1+ AGCTGCTCAATACCGgtaagagaagcaaaactcatagtgttgctgcctatgccacaggatc  
SRR1144996.39150053.2+ AGCTGCTCAATACCGgtaagagaagcaaaactcatagtgttgctgcctatgccacaggatc  
SRR1144996.47207117.1- AGCTGCTCAATACCGgtaagagaagcaaaactcatagtgttgctgcctatgccacaggatc  
SRR1144999.23114265.1- AGCTGCTCAATACCGgtaagagaagcaaaactcatagtattgctgcctatgccacaggatc  
SRR1144999.24418686.1- AGCTGCTCAATACCGgtaagagaagcaaaactcatagtgttgctgcctatgccacaggatc  
SRR1144999.60728096.2+ AGCTGCTCAATACCGgtaagagaagcaaaactcatagtgttgctgcctatgccacaggatc  
SRR1145000.11168659.2+ AGCTGCTCAATACCGgtaagagaagcaaaactcatagtattgctgcctatgccacaggatc  
SRR1145000.11328614.1+ AGCTGCTCAATACCGgtaagagaagcaaaactcatagtattgctgcctatgccacaggatc  
SRR1145000.24268485.1- AGCTGCTCAATACCGggaagagaagcaaaactcatggtattgctgcctatgccacaggatc  
SRR1145000.46913317.1+ AGCTGCTCAATACCGgtaagagaagcaaaactcatagtattgctgcctatgccacaggatc  
SRR1145004.19102511.2+ AGCTGCTCAATACCGgtaagagaagcaaaactcatagtgttgctgcctatgccacaggatc  
SRR1145004.25442647.1- AGCTGCTCAATACCGgtaagagaagcaaaactcatagtgttgctgcctatgccacaggatc  
SRR1145004.51056166.1+ AGCTGCTCAATACCGgtaagagaagcaaaactcatagtgttgctgcctatgccacaggatc  
SRR1145004.66225478.2- AGCTGCTCAATACCGgtaagagaagcaaaactcatagtgttgctgcctatgccacaggatc  
SRR1145004.72961567.1+ AGCTGCTCAATACCGgtaagagaagcaaaactcatagtgttgctgcctatgccacaggatc  
SRR1145005.18474681.2+ AGCTGCTCAATACCGgtaagagaagcaaaactcatagtgttgctgcctatgccacaggatc  
SRR1145005.30784500.2- AGCTGCTCAATACCGgtaagagaagcaaaactcatagtgttgctgcctatgccacaggatc  
SRR1145006.43186574.1+ AGCTGCTCAATACCGgtaagagaagcaaaactcatagtgttgctgcctatgccacaggatc  
SRR1145006.67445686.2+ AGCTGCTCAATACCGgtaagagaagcaaaactcatagtgttgctgcctatgccacaggatc  
SRR1145007.57624437.2- AGCTGCTCAATACCGgtaagagaagcaaaactcatagtgttgctgcctatgccacaggatc  
SRR1145007.7024762.1+ AGCTGCTCAATACCGgtaagagaagcaaaactcatagtgttgctgcctatgccacaggatc  
SRR1144997.44664327.2- GCTGCTCAATACCGgtaagagaagcaaaactcatagtattgctgcctatgccacaggatc  
SRR1144997.5975173.2- GCTGCTCAATACCGgtaagagaagcaaaactcatagtattgctgcctatgccacaggatc  
SRR1145004.20545723.1+ GCTGCTCAATACCGgtaagagaagcaaaactcatagtgttgctgcctatgccacaggatc  
SRR1145001.17796305.1+ CTGCTCAATACCGgtaagagaagcaaaactcatagtgttgctgcctatgc  
SRR1144994.7728093.1+ CTGCTCAATACCGgtaagagaagcaaaactcatagtgttgctgcctatgccacaggatc  
SRR1144994.13223558.1- GCTCAATACCGgtaagagaagcaaaactcatagtgttgctgcctatgccacaggatc  
SRR1144999.38456569.1- GCTCAATACCGgtaagagaagcaaaactcatagtgttgctgcctatgccacaggatc  
SRR1145006.59125753.2+ GCTCAATACCGgtaagagaagcaaaactcatagtgttgctgcctatgccacaggatc  
SRR1144994.51370169.1+ CTCAATACCGgtaagagaagcaaaactcatagtgttgctgcctatgccacaggatc  
SRR1144997.56753447.2- CTCAATACCGgtaagagaagcaaaactcatagtgttgctgcctatgccacaggatc  
SRR1144994.57368222.2- TCAATACCGgtaagagaagcaaaactcatagtgttgctgcctatgccacaggatc  
SRR1145005.35137077.2+ TCAATACCGgtaagagaagcaaaactcatagtgttgctgcctatgccacaggatc  
SRR1145006.36863603.2+ TCAATACCGgtaagagaagcaaaactcatagtgttgctgcctatgccacaggatc  
SRR1145007.12693144.2+ CAATACCGgtaagagaagcaaaactcatagtgttgctgcctatgccacaggatc  
SRR1145000.24983742.1+ ATACCGgtaagagaagcaaaactcatagtattgctgcctatgccacaggatc  
SRR1145001.33021318.1+ TACCGgtaagagaagcaaaactcatagtattgctgcctatgccacagga  
SRR1144992.29437553.2+ CCGgtaagagaagcaaaactcatagtgttgctgcctatgccacaggatc  
SRR1144994.32110124.2+ CCGgtaagagaagcaaaactcatagtgttgctgcctatgccacaggatc  
SRR1145004.29072333.1- GGgtaagagaagcaaaactcatagtgttctgcctatgccacaggatc  
SRR1145007.63998670.2+ GGgtaagagaagcaaaactcatagtgttgctgcctatgccacaggatc  
SRR1145007.70295917.2- GGgtaagagaagcaaaactcatagtgttgctgcctatgccacaggatc  
SRR1145001.73025495.2- Ggtaagagaagcaaaactcatagtattgctgcctatgccacaggatc

consensus

AGCTGCTCAATACCGgtaagagaagcaaaactcatagtgttgctgcctatgccacaggatc

## Z. Northern carmine bee-eater (No. 19), exon 9, WGS data

- CAP3 alignment of WGS data spanning exon 9 (uppercase letters)

```

      .   :   .   :   .   :   .   :   .   :   .   :
SRR958515.20550832.1+ acttcataacttttcttcccttctctgtctttcccagGAAT
SRR958516.84222393.2- acttcataacttttcttcccttctctgtctttcccagGAATGG
SRR958516.7111266.1-  acttcataacttttcttcccttctctgtctttcccagGAATGGTGA
SRR958514.97072629.2- acttcataacttttcttcccttctctgtctttcccagGAATGGTGAG
SRR958516.21534044.1+ acttcataacttttcttcccttctctgtctttcccagGAATGGTGAGCA
SRR958514.33856931.1+ acttcataacttttcttcccttctctgtctttcccagGAATGGTGAGCAG
SRR958514.78934248.2+ acttcataacttttcttcccttctctgtctttcccagGAATGGTGAGCAGCT
SRR958515.42200275.1+ acttcataacttttcttcccttctctgtctttcccagGAATGGTGCGCAGCT
SRR958515.30508980.1+ acttcataacttttcttcccttctctgtctttcccagGAATGGTGAGCAGCTAAGGA
SRR958514.100160626.2- acttcataacttttcttcccttctctgtctttcccagGAATGGTGAGCAGCTAAGGATCAT
SRR958514.101956646.1+ acttcataacttttcttcccttctctgtctttcccagGAATGGTGAGCAGCTAAGGATCAT
SRR958514.102512771.2+ acttcataacttttcttcccttctctgtctttcccagGAATGGTGAGCAGCTAAGGATCAT
SRR958514.103218794.1- acttcataacttttcttcccttctctgtctttcccagGAATGGTGAGCAGCTAAGGATCAT
SRR958514.21924864.1+ acttcataacttttcttcccttctctgtctttcccagGAATGGTGAGCAGCTAAGGATCAT
SRR958514.34612862.1- acttcataacttttcttcccttctctgtctttcccagGAATGGTGAGCAGCTAAGGATCAT
SRR958514.37021802.1+ acttcataacttttcttcccttctctgtctttcccagGAATGGTGAGCAGCTAAGGATCAT
SRR958514.38714466.1+ acttcataacttttcttcccttctctgtctttcccagGAATGGTGAGCAGCTAAGGATCAT
SRR958514.41207065.1- acttcataacttttcttcccttctctgtctttcccagGAATGGTGAGCAGCTAAGGATCAT
SRR958514.44130169.2+ acttcataacttttcttcccttctctgtctttcccagGAATGGTGAGCAGCTAAGGATCAT
SRR958515.10722057.1+ acttcataacttttcttcccttctctgtctttcccagGCATGGTGAGAAGCTAAGGATCAT
SRR958515.17031678.2- acttcataacttttcttcccttctctgtctttcccagGAATGGTGAGCAGCTAAGGATCAT
SRR958515.23577348.1+ acttcataacttttcttcccttctctgtctttcccagGAATGGTGAGCAGCTAAGGATCAT
SRR958515.48073369.1- acttcataacttgccttcccttctctgtctttcccagGAATGGTGAGCAGCTAAGGATCAT
SRR958515.50733784.2+ acttcataacttttcttcccttctctgtctttcccagGAATGGTGAGCAGCTAAGGATCAT
SRR958516.19993891.2+ acttcataacttttcttcccttctctgtctttcccagGAATGGTGAGCAGCTAAGGATCAT
SRR958516.58853563.2- acttcataacttttcttcccttctctgtctttcccagGAATGGTGAGCAGCTAAGGATCAT
SRR958516.68750980.2+ acttcataacttttcttcccttctctgtctttcccagGAATGGTGAGCAGCTAAGGATCAT
SRR958516.80803481.1- acttcataacttttcttcccttctctgtctttcccagGAATGGTGAGCAGCTAAGGATCAT
SRR958516.8984891.1-  acttcataacttttcttcccttctctgtctttcccagGAATGGTGAGCAGCTAAGGATCAT
SRR958516.91823061.1- acttcataacttttcttcccttctctgtctttcccagGAATGGTGAGCAGCTAAGGATCAT
SRR958516.75198625.2+ cttcataacttttcttcccttctctgtctttcccagGAATGGTGAGCAGCTAAGGATCAT
SRR958514.43162277.2- ttcataacttttcttcccttctctgtctttcccagGAATGGTGAGCAGCTAAGGATCAT
SRR958514.53475084.2- ttcataacttttcttcccttctctgtctttcccagGAATGGTGAGCAGCTAAGGATCAT
SRR958516.19559192.1- ttcataacttttcttcccttctctgtctttcccagGAATGGTGAGCAGCTAAGGATCAT
SRR958516.59335252.1+ cataacttttcttcccttctctgtctttcccagGAATGGTGAGCAGCTAAGGATCAT
SRR958516.68561080.2+ ataacttttcttcccttctctgtctttcccagGAATGGTGAGCAGCTAAGGATCAT
SRR958514.19678943.2+ taacttttcttcccttctctgtctttcccagGAATGGTGAGCAGCTAAGGATCAT
SRR958514.70551700.2- acttttcttcccttctctgtctttcccagGAATGGTGAGCAGCTAAGGATCAT
SRR958514.4761863.2-  ctttcttcccttctctgtctttcccagGAATGGTGAGCAGCTAAGGATCAT
SRR958516.8354132.2- ctttcttcccttctctgtctttcccagGAATGGTGAGCAGCTAAGGATCAT
SRR958516.9819331.2+ ctttcttcccttctctgtctttcccagGAATGGTGAGCAGCTAAGGATCAT
SRR958516.45410459.1- cttcccttctctgtctttcccagGAATGGTGAGCAGCTAAGGATCAT
SRR958516.56305879.1+ cttcccttctctgtctttcccagGAATGGTGAGCAGCTAAGGATCAT
SRR958515.46041706.2- ttccttctctgtctttaccctgGAATGGTGATCAGCTAAGGATCAT
SRR958514.87697778.2+ ccttctctgtctttcccagGAATGGTGAGCAGCTAAGGATCAT
SRR958514.13731632.2+ cttctctgtctttcccagGAATGGTGAGCAGCTAAGGATCAT
SRR958516.78560384.2- cttctctgtctttcccagGAATGGTGAGCAGCTAAGGATCAT
SRR958514.69289961.1+ tctctgtctttcccagGAATGGTGAGCAGCTAAGGATCAT
SRR958516.83788257.2+ tctctgtctttcccagGAATGGTGAGCAGCTAAGGATCAT
SRR958515.46791599.1+ tctgtctttcccagGAATGGTGAGCAGCTAAGGATCAT
SRR958516.26364114.1- ctgtctttcccagGAATGGTGAGCAGCTAAGGATCAT
SRR958515.55934198.2- gctttcccagGAATGGTGAGCAGCTAAGGATCAT
SRR958516.72519694.2- tcccagGAATGGTGAGCAGCTAAGGATCAT
SRR958515.20769019.2+ cccagGAATGGTGAGCAGCTAAGGATCAT
SRR958515.21148416.2- ccagGAATGGTGAGCAGCTAAGGATCAT
SRR958514.66386993.2- cagGAATGGTGAGCAGCTAAGGATCAT
SRR958516.62012920.1- cagGAATGGTGAGCAGCTAAGGATCAT
SRR958514.33902979.1+ agGAATGGTGAGCAGCTAAGGATCAT
SRR958515.26701002.2+ agGAATGGTGAGCAGCTAAGGATCAT
SRR958516.56093803.1+ gGAATGGTGAGCAGCTAAGGATCAT
SRR958514.22377625.1+ GAATGGTGAGCAGCTAAGGATCAT
SRR958516.70437229.1- ATGGTGAGCAGCTAAGGATCAT
SRR958514.100735365.2+ TGGTGAGCAGCTAAGGATCAT
SRR958514.15141129.2- CAGCTAAGGATCAT
SRR958515.36716288.2+ GCTAAGGATCAT
SRR958516.83781102.2+ GCTAAGGATCAT
SRR958516.49821190.1+ TAAGGATCAT
SRR958516.9605271.2- AGGATCAT
SRR958515.32552432.2- GGATCAT

```

consensus

acttcataacttttcttcccttctctgtctttcccagGAATGGTGAGCAGCTAAGGATCAT

SRR958514.37021802.1+  
SRR958514.38714466.1+

C  
CTGTG



SRR958516.68750980.2+ CTGTG  
SRR958515.10722057.1+ CTGCGAGG  
SRR958515.48073369.1- CTGTGAGG  
SRR958514.21924864.1+ CTGTGAGGA  
SRR958515.17031678.2- CTGTGAGGACAGTA  
SRR958515.50733784.2+ CTGTGAGGACAATA  
SRR958516.91823061.1- CTGTGAGGACAGTA  
SRR958514.103218794.1- CTGTGAGGACAATAAG  
SRR958516.58853563.2- CTGTGAGGACAATAAGTA  
SRR958514.44130169.2+ CTGTGAGGACAATAAGTATG  
SRR958514.19678943.2+ CTGTGAGGACAGTAAGTATGA  
SRR958514.100160626.2- CTGTGAGGACAGTAAGTATGACTTCA  
SRR958514.34612862.1- CTGTGAGGACAGTAAGTATGACTTCAGG  
SRR958515.23577348.1+ CTGTGAGGACAATAAGTATGACTTCAGGACA  
SRR958516.19993891.2+ CTGTGAGGACAGTAAGTATGACTTCAGGACA  
SRR958514.41207065.1- CTGTGAGGACAGTAAGTATGACTTCAGGACATT  
SRR958516.8984891.1- CTGTGAGGACAATAAGTATGACTTCAGGACATTG  
SRR958516.80803481.1- CTGTGAGGACAATAAGTATGACTTCAGGACATTGAG  
SRR958514.102512771.2+ CTGTGAGGACAATAAGTATGACTTCAGGACATTGAGG  
SRR958514.101956646.1+ CTGTGAGGACAGTAAGTATGACTTCAGGACATTGAGGAC  
SRR958514.53475084.2- CTGTGAGGACAGTAAGTATGACTTCAGGACATTGAGGACAT  
SRR958516.75198625.2+ CTGTGAGGACAGTAAGTATGACTTCAGGACATTGAGGACAT  
SRR958514.43162277.2- CTGTGAGGACAGTAAGTATGACTTCAGGACATTGAGGACATG  
SRR958516.19559192.1- CTGTGAGGACAGTAAGTATGACTTCAGGACATTGAGGACATG  
SRR958516.59335252.1+ CTGTGAGGACAATAAGTATGACTTCAGGACATTGAGGACATGAA  
SRR958514.68561080.2+ CTGTGAGGACAATAAGTATGACTTCAGGACATTGAGGACATGAAG  
SRR958515.46041706.2- CTGTGAGGACAATAAGTATGACTTCAGGACATTGAGGACATGAAG  
SRR958516.8354132.2- CTGTGAGGACAATAAGTATGACTTCAGGACATTGAGGACATGAAGGA  
SRR958514.70551700.2- CTGTGAGGACAGTAAGTATGACTTCAGGACATTGAGGACATGAAGGAA  
SRR958514.4761863.2- CTGTGAGGACAATAAGTATGACTTCAGGACATTGAGGACATGAAGGAAA  
SRR958516.9819331.2+ CTGTGAGGACAGTAAGTATGACTTAAAGGCCATTGAGGACATGAAGGAAA  
SRR958516.45410459.1- CTGTGAGGACAATAAGTATGACTTCAGGACATTGAGGACATGAAGGAAAATTGT  
SRR958516.56305879.1+ CTGTGAGGACAGTAAGTATGACTTCAGGACATTGAGGACATGAAGGAAAATTGT  
SRR958514.87697778.2+ CTGTGAGGACAGTAAGTATGACTTCAGGACATTGAGGACATGAAGGAAAATTGTGATA  
SRR958514.13731632.2+ CTGTGAGGACAGTAAGTATGACTTCAGGACATTGAGGACATGAAGGAAAATTGTGATAA  
SRR958516.78560384.2- CTGTGAGGACAATAAGTATGACTTCAGGACATTGAGGACATGAAGGAAAATTGTGATAA  
SRR958514.100735365.2+ CTGTGAGGACAGTAAGTATGACTTCAGGACATTGAGGACATGAAGGAAAATTGTGATAAACC  
SRR958514.15141129.2- CTGTGAGGACAATAAGTATGACTTCAGGACATTGAGGACATGAAGGAAAATTGTGATAAACC  
SRR958514.22377625.1+ CTGTGAGGACAGTAAGTATGACTTCAGGACATTGAGGACATGAAGGAAAATTGTGATAAACC  
SRR958514.33902979.1+ CTGTGAGGACAATAAGTATGACTTCAGGACATTGAGGACATGAAGGAAAATTGTGATAAACC  
SRR958514.66386993.2- CTGTGAGGACAATAAGTATGACTTCAGGACATTGAGGACATGAAGGAAAATTGTGATAAACC  
SRR958514.69289961.1+ CTGTGAGGACAGTAAGTATGACTTCAGGACATTGAGGACATGAAGGAAAATTGTGATAAACC  
SRR958515.20769019.2+ CTGTGAGGACAGTAAGTATGACTTCAGGACATTGAGGACATGAAGGAAAATTGTGATAAACC  
SRR958516.21148416.2- CTGTGAGGACAATAAGTATGACTTCAGGACATTGAGGACATGAAGGAAAATTGTGATAAACC  
SRR958515.26701002.2+ CTGTGAGGACAATAAGTATGACTTCAGGACATTGAGGACATGAAGGAAAATTGTGATAAACC  
SRR958515.32552432.2- CTGTGAGGACAATAAGTATGACTTCAGGACATTGAGGACATGAAGGAAAATTGTGATAAACC  
SRR958515.36716288.2+ CTGTGAGGACAATAAGTATGACTTCAGGACATTGAGGACATGAAGGAACTTGTGATAAACC  
SRR958515.46791599.1+ CTGTGAGGACAGTAAGTATGACTTCAGGACATTGAGGACATGAAGGAAAATTGTGATAAACC  
SRR958515.55934198.2- CTGTGAGGACAATAAGTATGACTTCAGGACATTGAGGACATGAAGGAAAATTGTGATAAACC  
SRR958516.26364114.1- CTGTGAGGACAATAAGTATGACTTCAGGACATTGAGGACATGAAGGAAAATTGTGATAAACC  
SRR958516.49821190.1+ CTGTGAGGACAGTAAGTATGACTTCAGGACATTGAGGACATGAAGGAAAATTGTGATAAACC  
SRR958516.56093803.1+ CTGTGAGGACAATAAGTATGACTTCAGGACATTGAGGACATGAAGGAAAATTGTGATAAACC  
SRR958516.62012920.1- CTGTGAGGACAGTAAGTATGACTTCAGGACATTGAGGACATGAAGGAAAATTGTGATAAACC  
SRR958516.70437229.1- CTGTGAGGACAATAAGTATGACTTCAGGACATTGAGGACATGAAGGAAAATTGTGATAAACC  
SRR958516.72519694.2- CTGTGAGGACAGTAAGTATGACTTCAGGACATTGAGGACATGAAGGAAAATTGTGATAAACC  
SRR958516.83781102.2+ CTGTGAGGACAGTAAGTATGACTTCAGGACATTGAGGACATGAAGGAAAATTGTGATAAACC  
SRR958516.83788257.2+ CTGTGAGGACAATAAGTATGACTTCAGGACATTGAGGACATGAAGGAAAATTGTGATAAACC  
SRR958516.9605271.2- CTGTGAGGACAATAAGTATGACTTCAGGACATTGAGGACATGAAGGAAAATTGTGATAAACC  
SRR958516.79663606.1+ GACAATAAGTATGACTTCAGGACATTGAGGACATGAAGGAAAATTGTGATAAACC  
SRR958516.82469221.2- GACAATAAGTATGACTTCAGGACATTGAGGACATGAAGGAAAATTGTGATAAACC  
SRR958515.50726151.1- ATAAGTATGACTTCAGGACATTGAGGACATGAAGGAAAATTGTGATAAACC  
SRR958516.34790766.2+ CTTGAGGACATTGAGGACATGAAGGAAAATTGTGATAAACC  
SRR958514.23117107.1+ CAGGACATTGAGGACATGAAGGAAAATTGTGATAAACC  
SRR958516.62641480.2+ AGGACATGAAGGAAAATTGTGATAAACC  
SRR958515.52334685.2+ GACATGAAGGAAAATTGTGATAAACC  
SRR958515.26161489.1- ATGAAGGAAAATTGTGATAAACC  
SRR958514.19677880.2+ TGAAGGAAAATTGTGATAAACC  
SRR958515.59157021.2- TGAAGGAAAATTGTGATAAACC  
SRR958516.72658279.1+ GAAGGAAAATTGTGATAAACC  
SRR958515.46572499.2- AAGGAAAATTGTGATAAACC  
SRR958514.28785838.2+ AAATTGTGATAAACC  
SRR958516.90165724.1- AATTGTGATAAACC  
SRR958515.31117436.1- TGTGATAAACC  
SRR958516.38045271.1- ATAACC  
SRR958514.97294212.1- TAACA

consensus

CTGTGAGGACAATAAGTATGACTTCAGGACATTGAGGACATGAAGGAAAATTGTGATAAACC

SRR958515.46791599.1+  
SRR958516.26364114.1-  
SRR958515.55934198.2-  
SRR958516.62012920.1-  
SRR958516.72519694.2-

AA  
AAA  
AAACC  
AAACCAgta  
AAACCAgtaa

SRR958515.20769019.2+ AAACCAgtaag  
SRR958515.21148416.2- AAACCAgtaaga  
SRR958514.66386993.2- AAACCAgtaagat  
SRR958514.33902979.1+ AAACCAgtaagatc  
SRR958515.26701002.2+ AAACCAgtaagatc  
SRR958516.56093803.1+ AAACCAgtaagatcc  
SRR958514.22377625.1+ AAACCAgtaagatcct  
SRR958516.70437229.1- AAACCAgtaagatccttc  
SRR958514.100735365.2+ AAACCAgtaagatccttcc  
SRR958514.15141129.2- AAACCAgtaagatccttccctgtgac  
SRR958515.36716288.2+ AAACCAgtaagatccttccctgtgacac  
SRR958516.83781102.2+ AAACCAgtaagatccttccctgtgacac  
SRR958516.49821190.1+ AAACCAgtaagatccttccctgtgacacag  
SRR958516.9605271.2- AAACCAgtaagatccttccctgtgacacagcc  
SRR958515.32552432.2- AAACCAgtaagatccttccctgtgacacagcca  
SRR958516.79663606.1+ AAACCAgtaagatccttccctgtgacacagccacgggcaggcagcct  
SRR958516.82469221.2- AAACCAgtaagatccttccctgtgacacagccacgggcaggcagcct  
SRR958515.50726151.1- AAACCAgtaagatccttccctgtgacacagccacgggcaggcagcctgggg  
SRR958516.34790766.2+ AAACCAgtaagatccttccctgtgacacagccacgggcaggcagcctggggagg  
SRR958514.19677880.2+ AAACCAgtaagatccttccctgtgacacagccacgggcaggcagcctggggagggtggtga  
SRR958514.23117107.1+ AAACCAgtaagatccttccctgtgacacagccacgggcaggcagcctggggagggtggtga  
SRR958514.28785838.2+ AAACCAgtaagatccttccctgtgacacagccacgggcaggcagcctggggagggtggtga  
SRR958514.70127072.1+ AAACCAgtaagatccttccctgtgacacagccacgggcaggcagcctggggagggtggtga  
SRR958514.80404086.1+ AAACCAgtaagatccttccctgtgacacagccacgggcaggcagcctggggagggtggtga  
SRR958514.97294212.1- AAACCAgtaagatccttccctgtgacacagccacgggcaggcagcctggggagggtggtga  
SRR958515.26161489.1- AAACCAgtaagatccttccctgtgacacagccacgggcaggcagcctggggagggtggtga  
SRR958515.31117436.1- AAACCAgtaagatccttccctgtgacacagccacgggcaggcagcctggggagggtggtga  
SRR958515.46572499.2- AAACCAgtaagatccttccctgtgacacagccacgggcaggcagcctggggagggtggtga  
SRR958515.52334685.2+ AAACCAgtaagatccttccctgtgacacagccacgggcaggcagcctggggagggtggtga  
SRR958515.59157021.2- AAACCAgtaagatccttccctgtgacacagccacgggcaggcagcctggggagggtggtga  
SRR958516.1104583.2- AAACCAgtaagatccttccctgggacacagccacgggcaggcagcctggggagggtggtga  
SRR958516.38045271.1- AAACCAgtaagatccttccctgtgacacagccacgggcaggcagcctggggagggtggtga  
SRR958516.62641480.2+ AAACCAgtaagatccttccctgtgacacagccacgggcaggcagcctggggagggtggtga  
SRR958516.72658279.1+ AAACCAgtaagatccttccctgtgacacagccacgggcaggcagcctggggagggtggtga  
SRR958516.90165724.1- AAACCAgtaagatccttccctgtgacacagccacgggcaggcagcctggggagggtggtga  
SRR958515.38576117.1- AAACCAgtaagatccttccctgtgacacagccacgggcaggcagcctggggagggtggtga  
SRR958514.62839659.1+ CAgtaagatccttccctgtgacacagccacgggcaggcagcctggggagggtggtga

consensus

AAACCAgtaagatccttccctgtgacacagccacgggcaggcagcctggggagggtggtga

---
