# Supplementary material for: MOXD2, a Gene Possibly Associated with Olfaction, Is Frequently Inactivated in Birds
Source: PubMed Central journal article supplement (PMC4830563; doi:10.1371/journal.pone.0152431), 2016-04-13
Supplement: pone.0152431.s005.pdf [file pone.0152431.s005.pdf]

# S5 Fig. Dotplot analysis of *MOXD2* genomic sequences

No. 1

Order: Passeriformes

Family: Acanthisittidae

Scientific name: *Acanthisitta chloris*

Common name: Rifleman

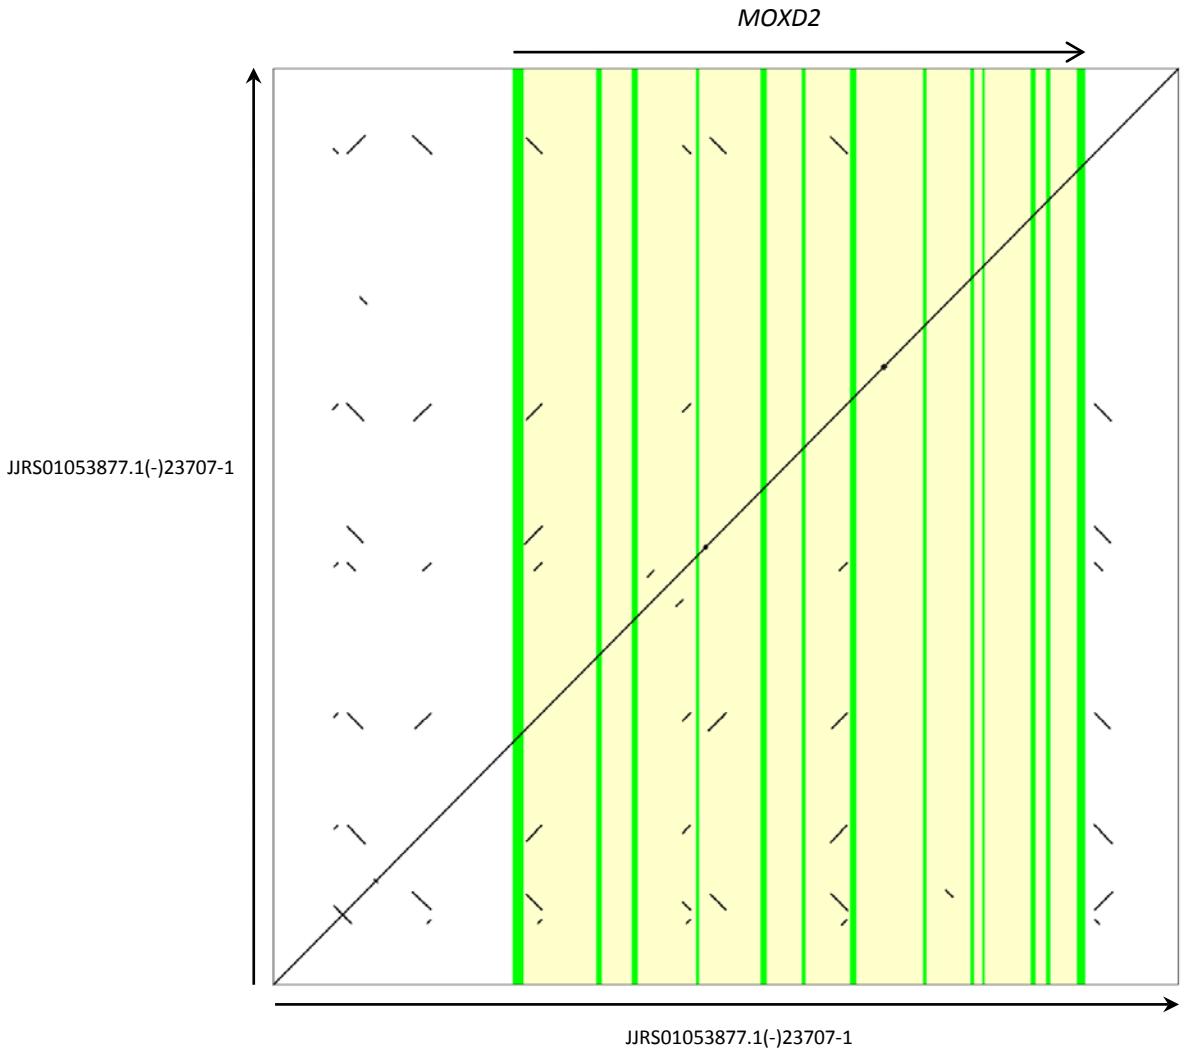

Order: Passeriformes

Family: Acanthisittidae

Scientific name: *Acanthisitta chloris*

Common name: Rifleman

No. 2  
Order: Passeriformes  
Family: Pipridae  
Scientific name: *Manacus vitellinus*  
Common name: Golden-collared manakin

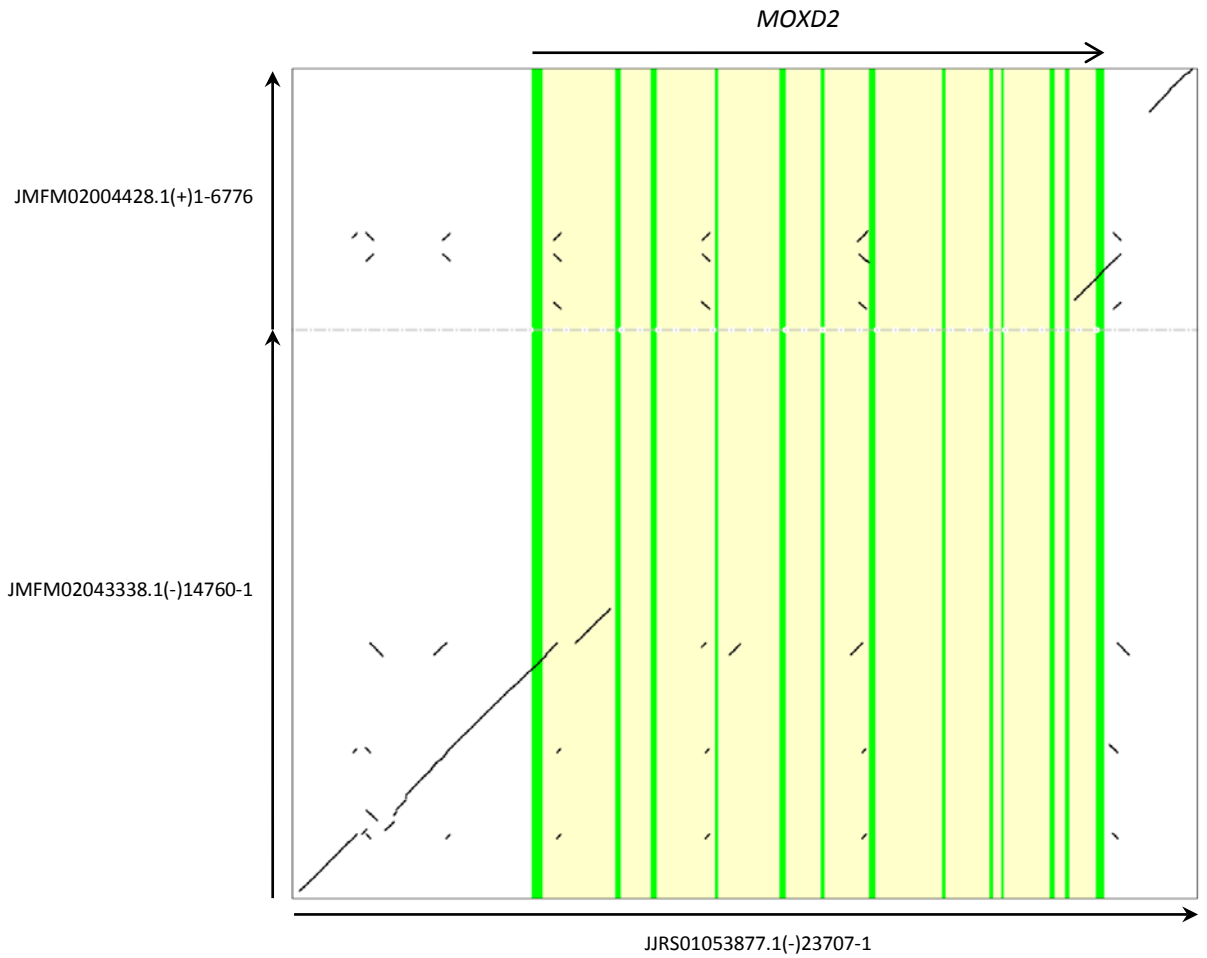

Order: Passeriformes  
Family: Acanthisittidae  
Scientific name: *Acanthisitta chloris*  
Common name: Rifleman

No. 3

Order: Passeriformes

Family: Corvidae

Scientific name: *Corvus brachyrhynchos*

Common name: American crow

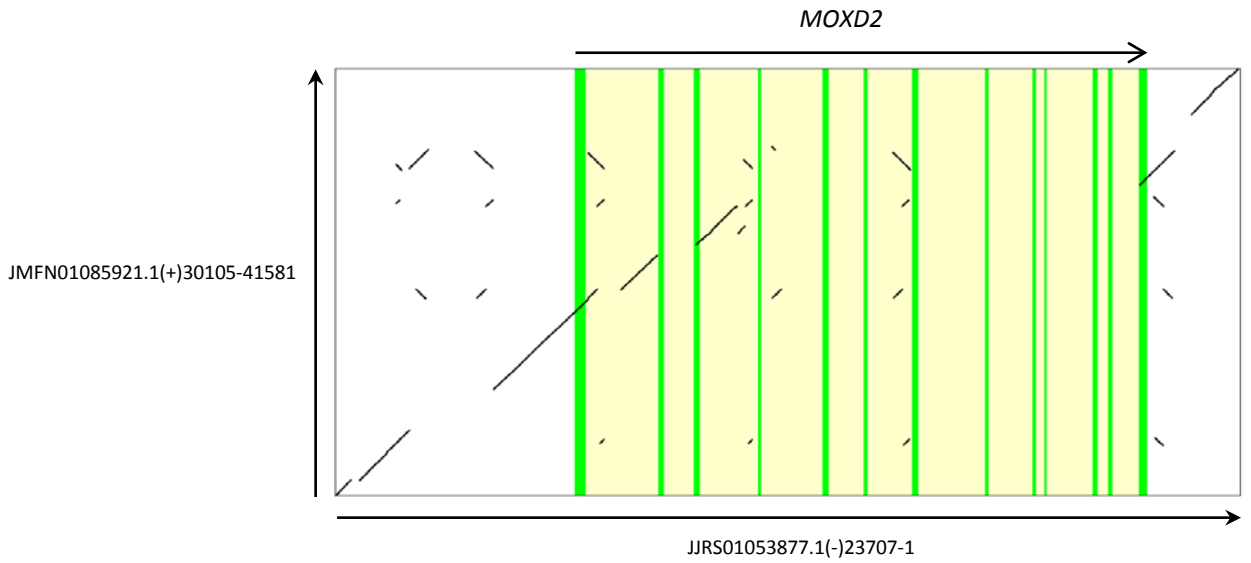

Order: Passeriformes

Family: Acanthisittidae

Scientific name: *Acanthisitta chloris*

Common name: Rifleman

No. 4

Order: Passeriformes

Family: Corvidae

Scientific name: *Corvus cornix cornix*

Common name: Hooded crow

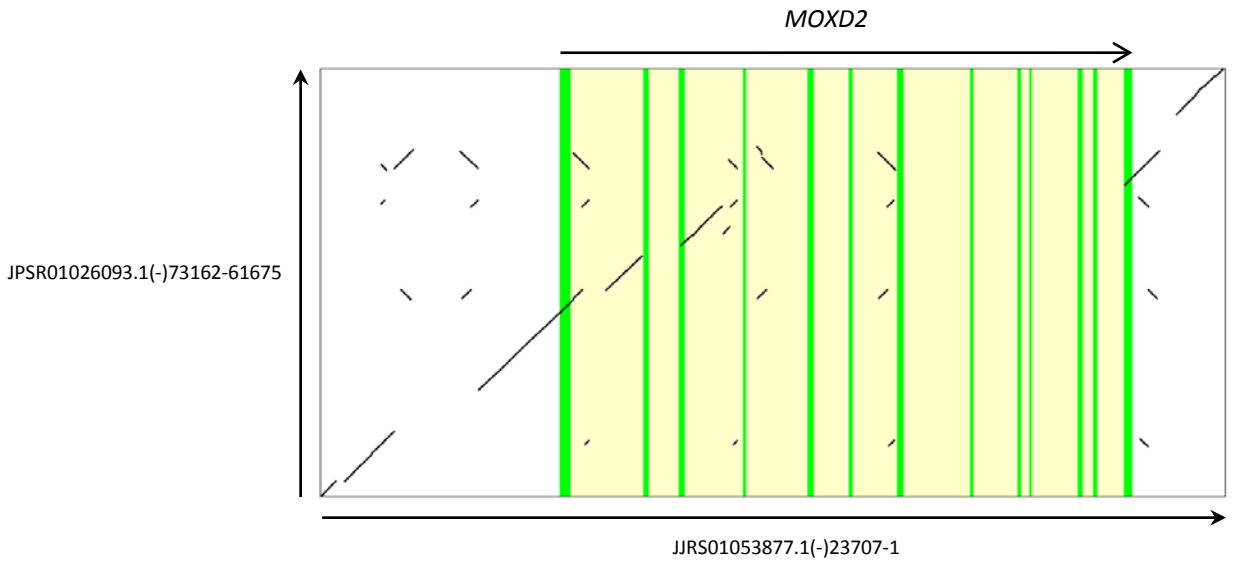

Order: Passeriformes

Family: Acanthisittidae

Scientific name: *Acanthisitta chloris*

Common name: Rifleman

No. 5

Order: Passeriformes

Family: Paridae

Scientific name: *Pseudopodoces humilis*

Common name: Ground tit

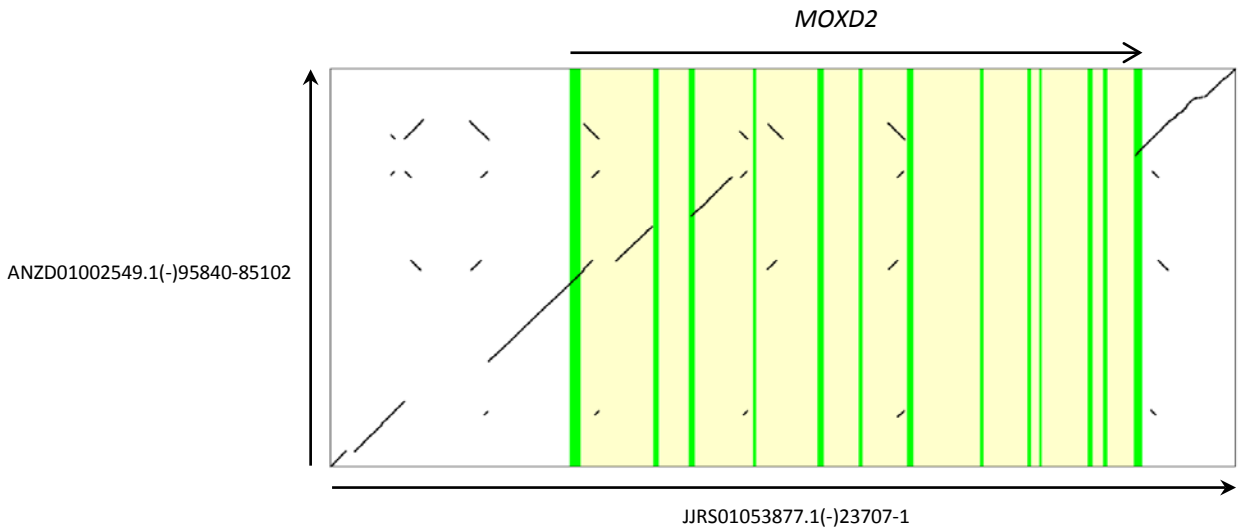

Order: Passeriformes

Family: Acanthisittidae

Scientific name: *Acanthisitta chloris*

Common name: Rifleman

No. 6

Order: Passeriformes

Family: Muscicapidae

Scientific name: *Ficedula albicollis*

Common name: Collared flycatcher

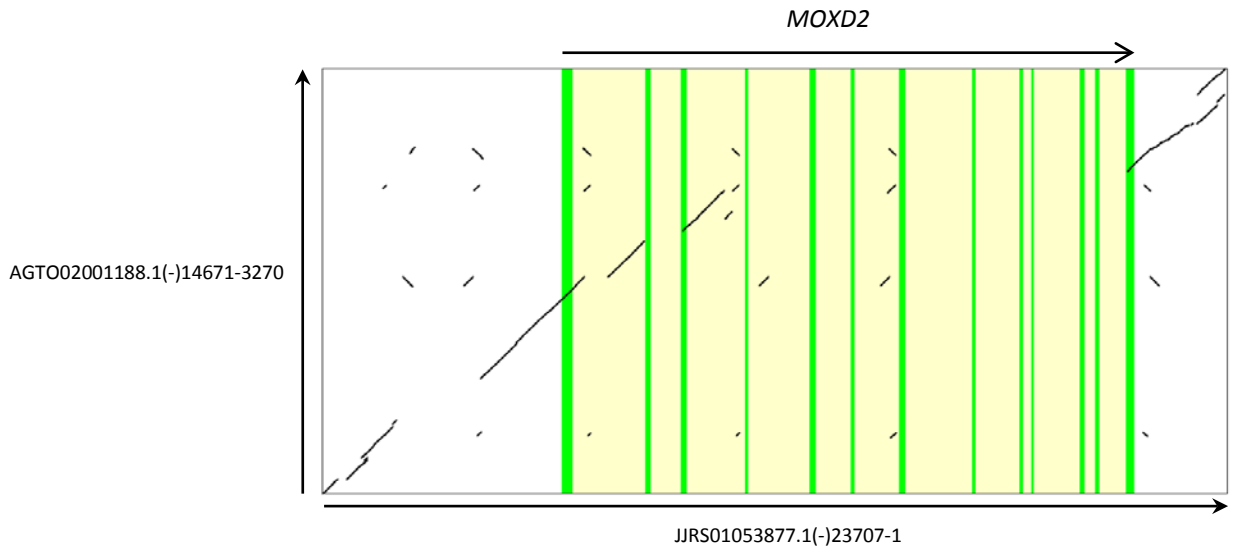

Order: Passeriformes

Family: Acanthisittidae

Scientific name: *Acanthisitta chloris*

Common name: Rifleman

No. 7  
Order: Passeriformes  
Family: Estrildidae  
Scientific name: *Taeniopygia guttata*  
Common name: Zebra finch

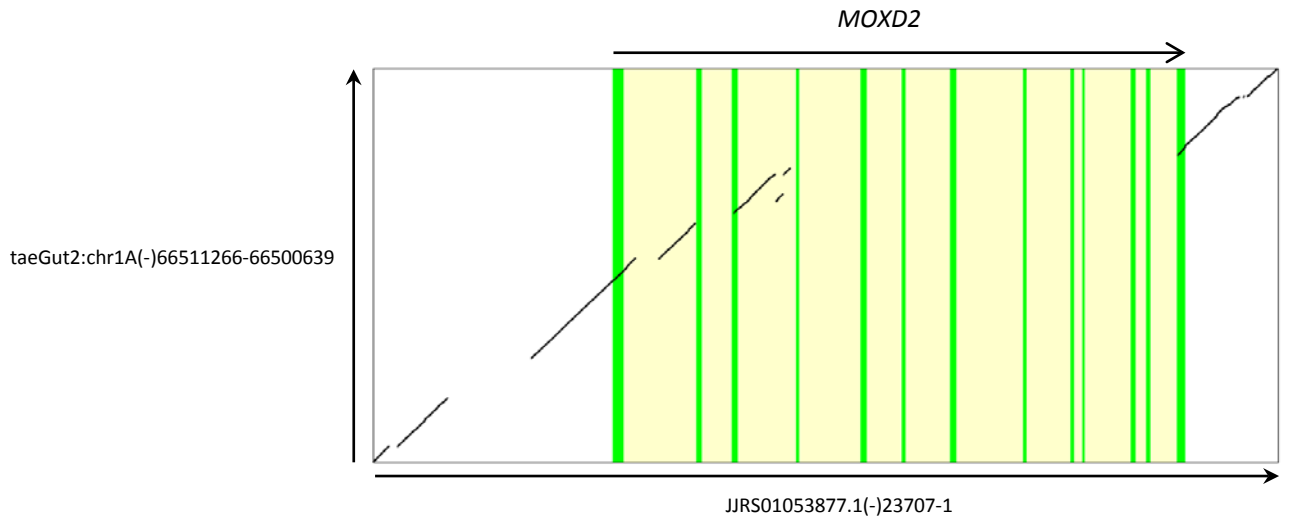

Order: Passeriformes  
Family: Acanthisittidae  
Scientific name: *Acanthisitta chloris*  
Common name: Rifleman

No. 8  
Order: Passeriformes  
Family: Fringillidae  
Scientific name: *Serinus canaria*  
Common name: Atlantic canary

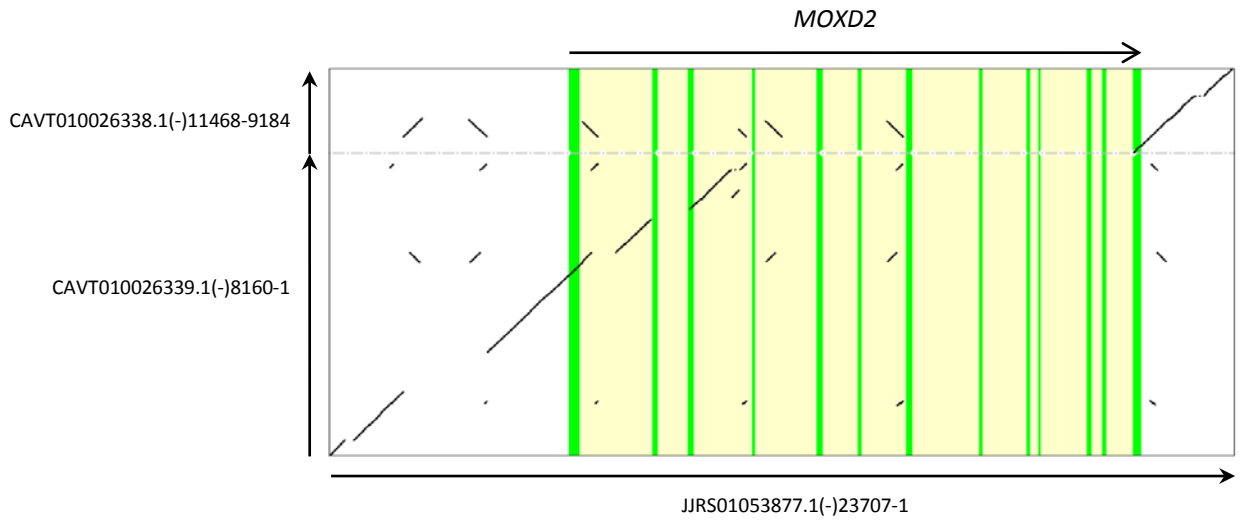

Order: Passeriformes  
Family: Acanthisittidae  
Scientific name: *Acanthisitta chloris*  
Common name: Rifleman



No. 9

Order: Passeriformes

Family: Emberizidae

Scientific name: *Geospiza fortis*

Common name: Medium ground finch

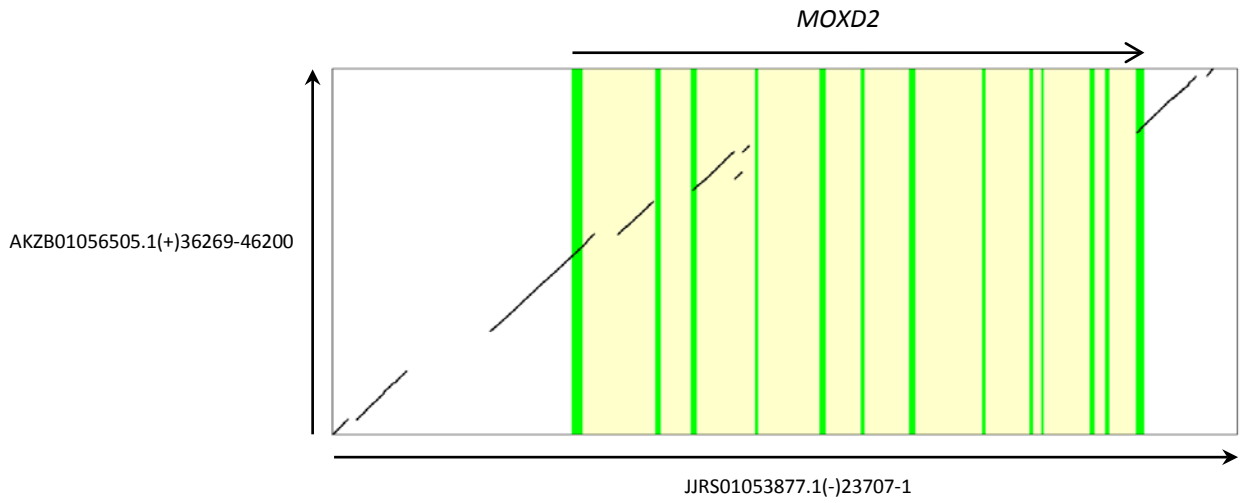

Order: Passeriformes

Family: Acanthisittidae

Scientific name: *Acanthisitta chloris*

Common name: Rifleman

No. 10

Order: Passeriformes

Family: Emberizidae

Scientific name: *Zonotrichia albicollis*

Common name: White-throated sparrow

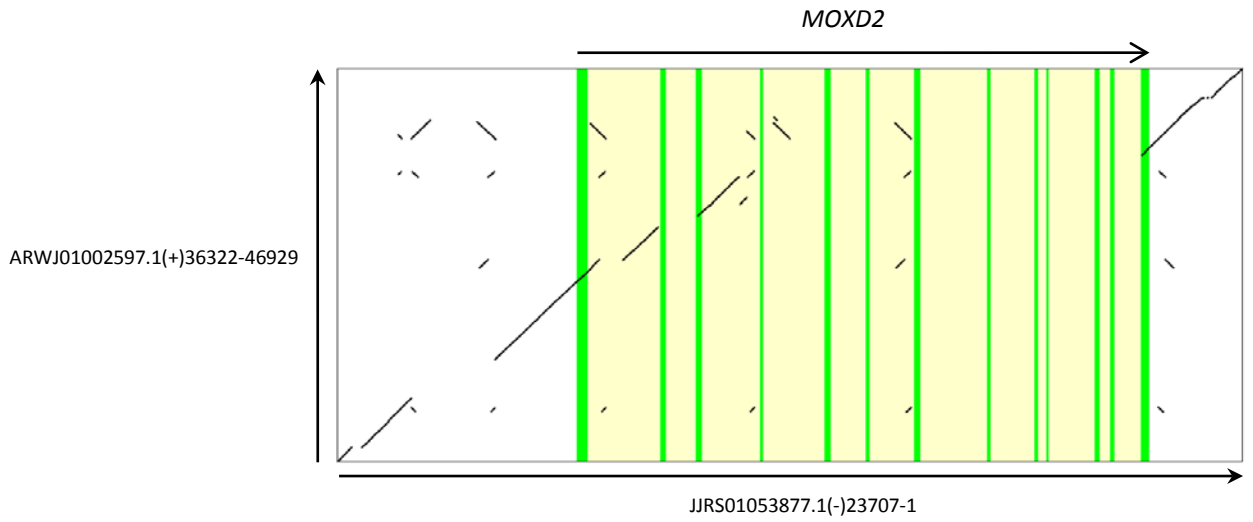

Order: Passeriformes

Family: Acanthisittidae

Scientific name: *Acanthisitta chloris*

Common name: Rifleman

No. 11  
Order: Psittaciformes  
Family: Psittacidae  
Scientific name: *Nestor notabilis*  
Common name: Kea

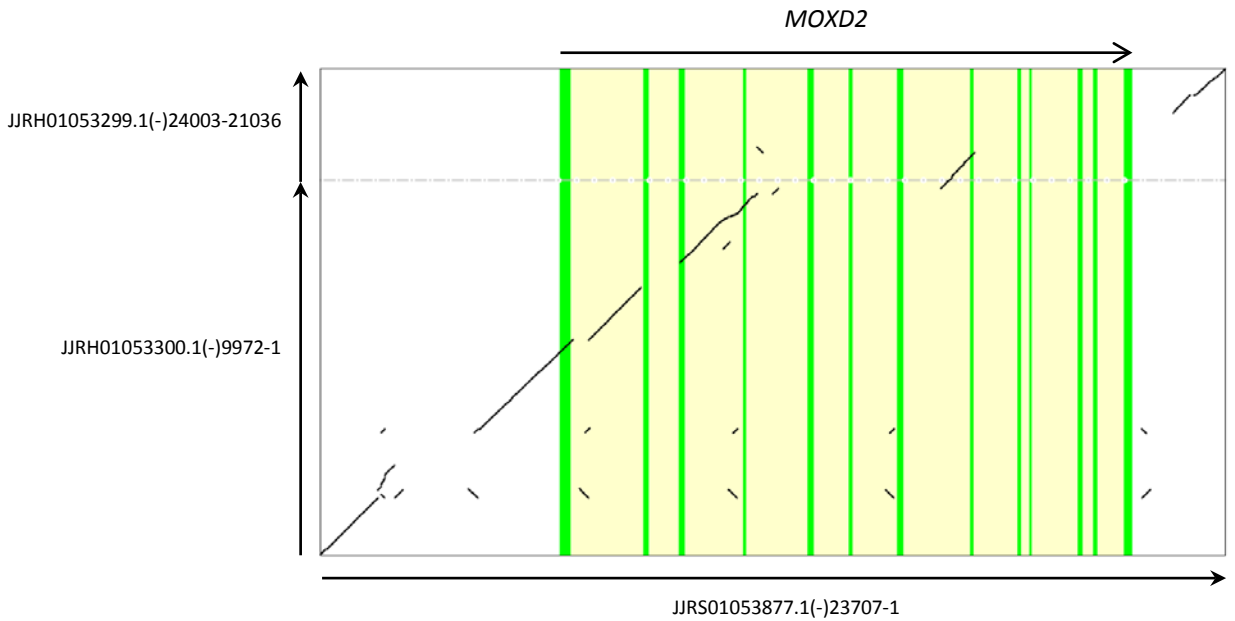

Order: Passeriformes  
Family: Acanthisittidae  
Scientific name: *Acanthisitta chloris*  
Common name: Rifleman

No. 12

Order: Psittaciformes

Family: Psittacidae

Scientific name: *Melopsittacus undulatus*

Common name: Budgerigar

MOXD2

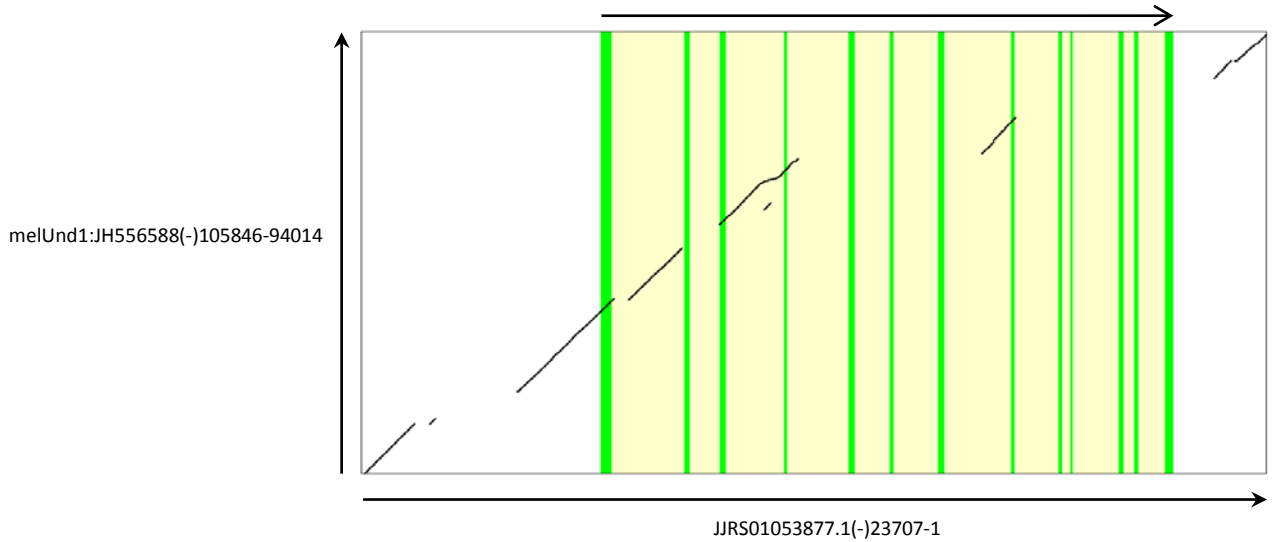

Order: Passeriformes

Family: Acanthisittidae

Scientific name: *Acanthisitta chloris*

Common name: Rifleman

No. 13

Order: Psittaciformes

Family: Psittacidae

Scientific name: *Amazona vittata*

Common name: Puerto Rican Amazon

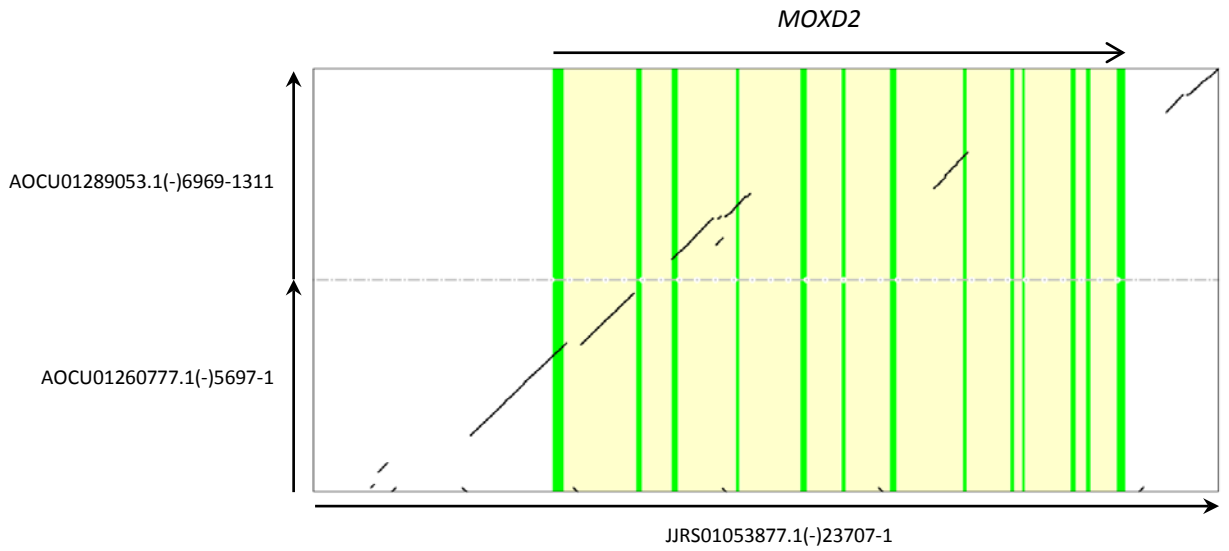

Order: Passeriformes

Family: Acanthisittidae

Scientific name: *Acanthisitta chloris*

Common name: Rifleman

No. 14  
Order: Psittaciformes  
Family: Psittacidae  
Scientific name: *Ara macao*  
Common name: Scarlet macaw

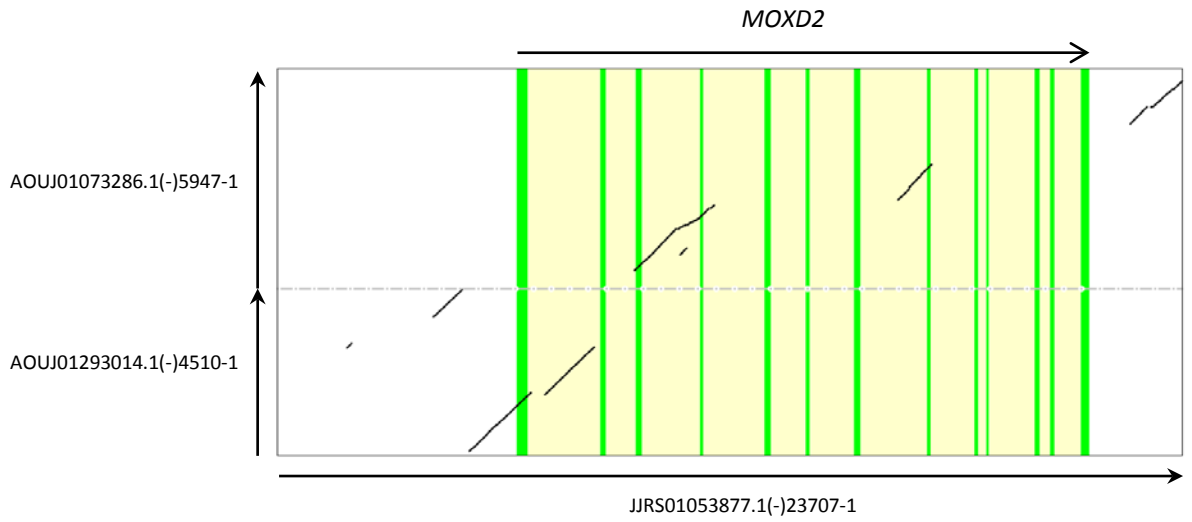

Order: Passeriformes  
Family: Acanthisittidae  
Scientific name: *Acanthisitta chloris*  
Common name: Rifleman

No. 15  
Order: Falconiformes  
Family: Falconidae  
Scientific name: *Falco cherrug*  
Common name: Saker falcon

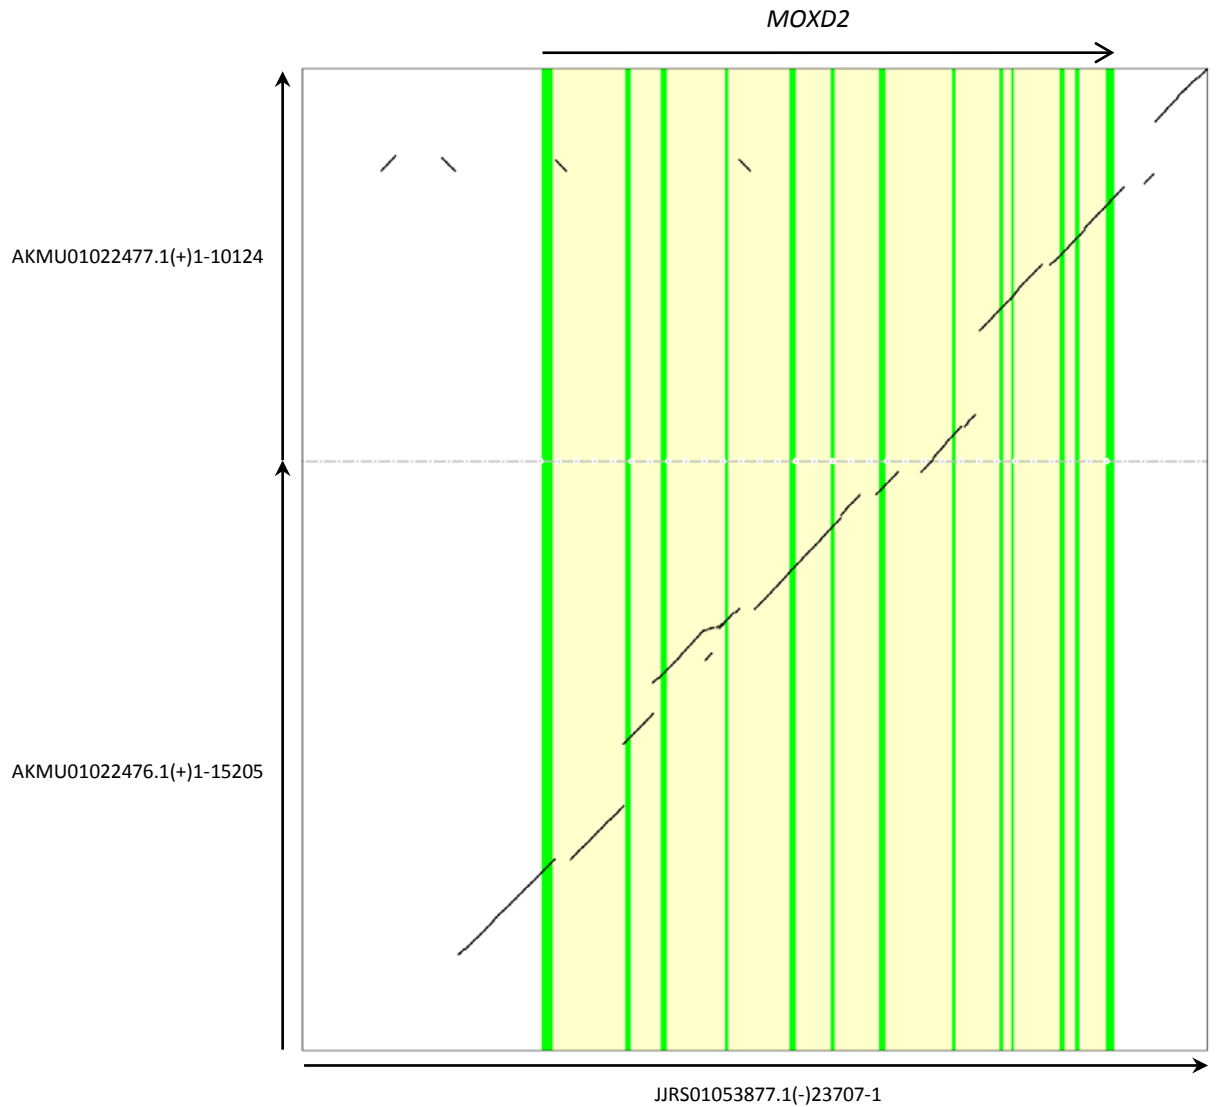

Order: Passeriformes  
Family: Acanthisittidae  
Scientific name: *Acanthisitta chloris*  
Common name: Rifleman

No. 16

Order: Falconiformes

Family: Falconidae

Scientific name: *Falco peregrinus*

Common name: Peregrine falcon

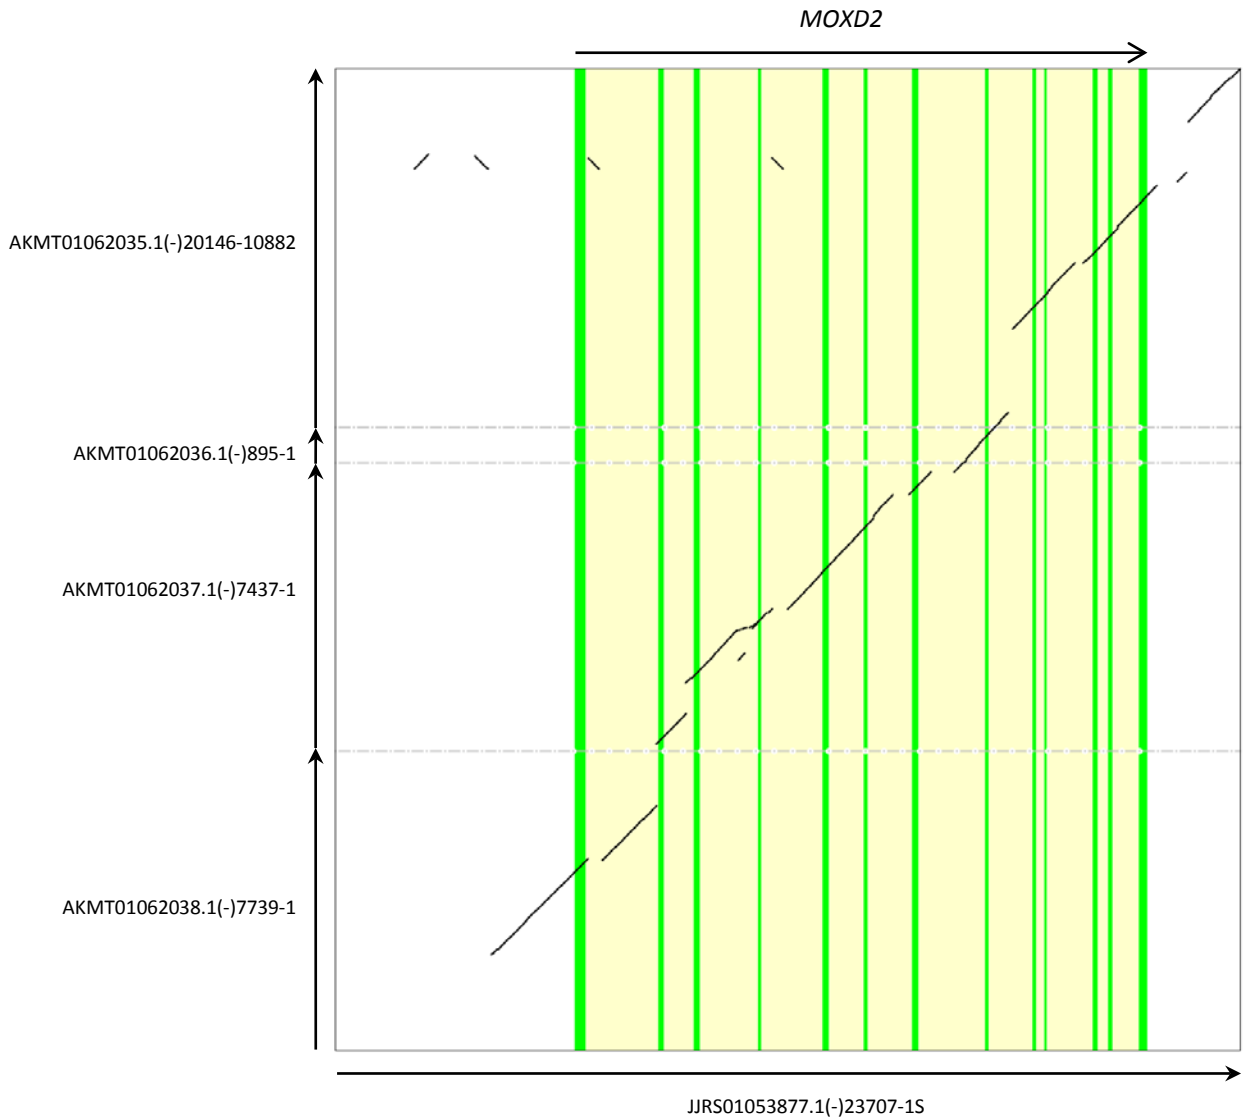

Order: Passeriformes

Family: Acanthisittidae

Scientific name: *Acanthisitta chloris*

Common name: Rifleman



No. 17

Order: Cariamiformes

Family: Cariamidae

Scientific name: *Cariama cristata*

Common name: Red-legged seriema

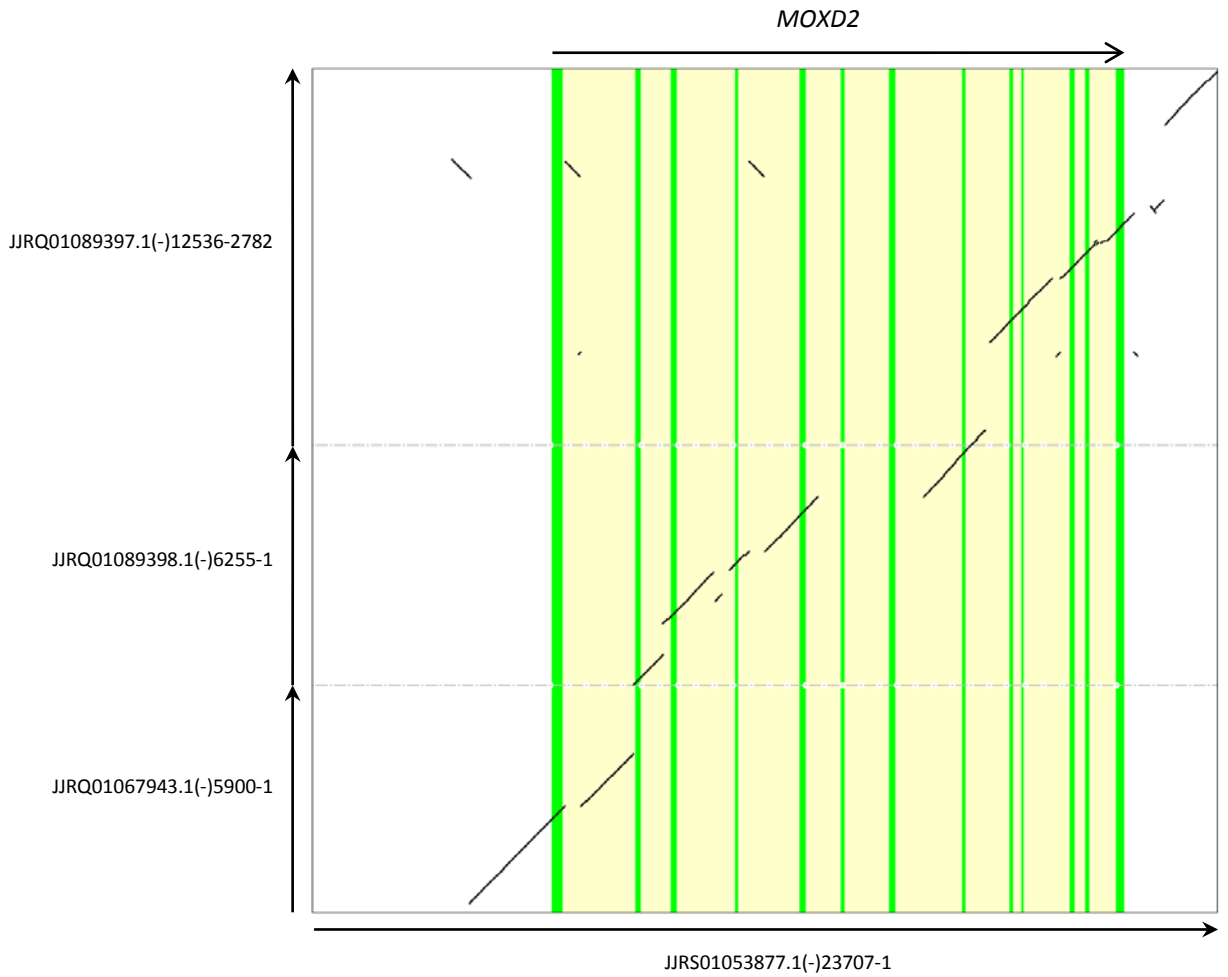

Order: Passeriformes

Family: Acanthisittidae

Scientific name: *Acanthisitta chloris*

Common name: Rifleman

No. 18

Order: Piciformes

Family: Picidae

Scientific name: *Picoides pubescens*

Common name: Downy woodpecker

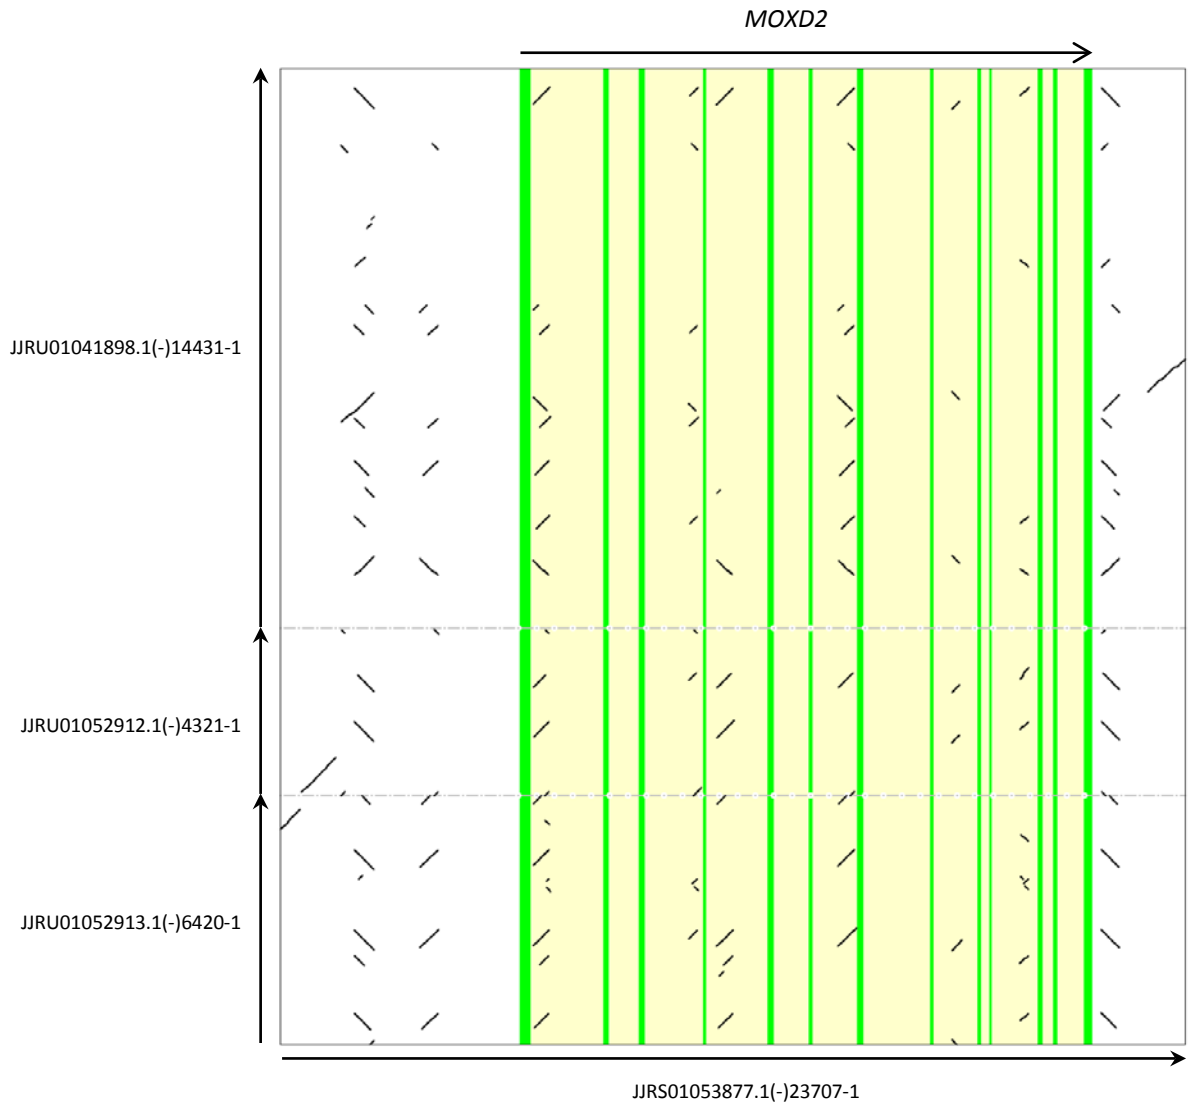

Order: Passeriformes

Family: Acanthisittidae

Scientific name: *Acanthisitta chloris*

Common name: Rifleman

No. 19  
Order: Coraciiformes  
Family: Meropidae  
Scientific name: *Merops nubicus*  
Common name: Northern carmine bee-eater

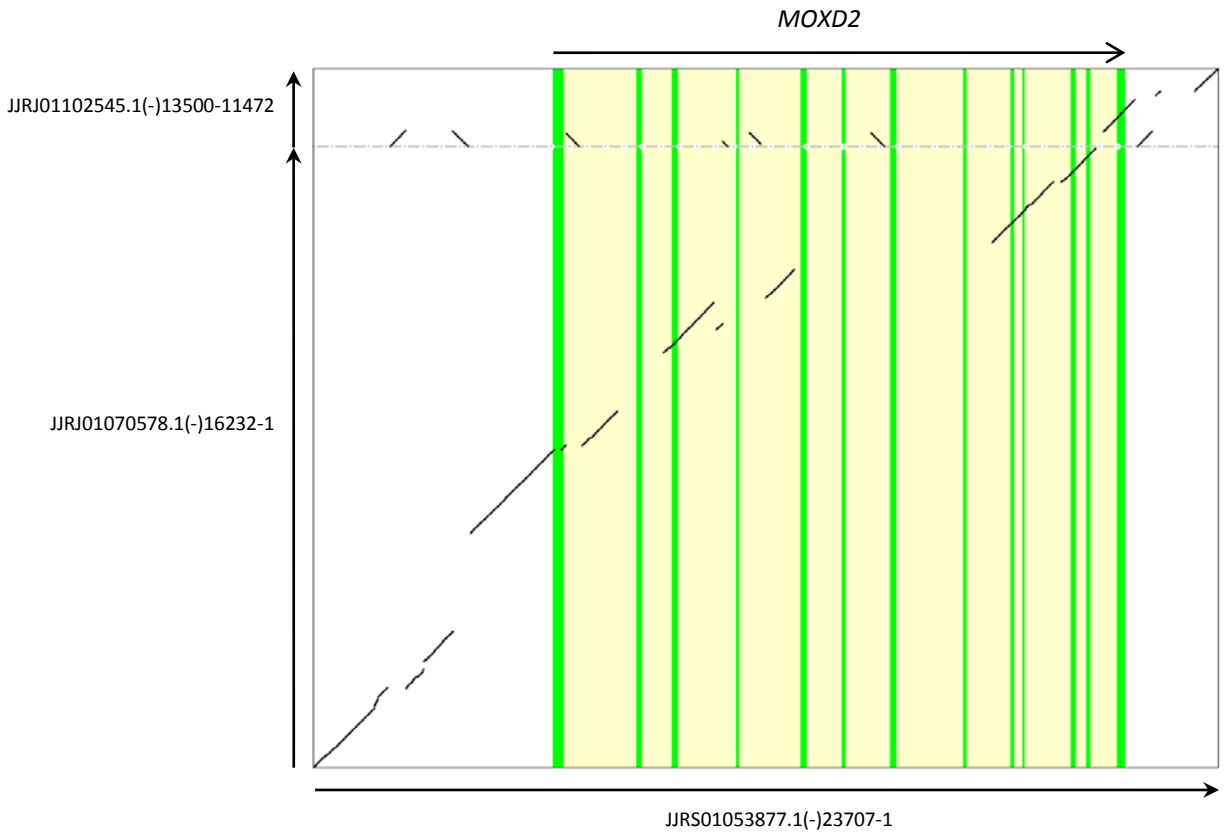

Order: Passeriformes  
Family: Acanthisittidae  
Scientific name: *Acanthisitta chloris*  
Common name: Rifleman

No. 20

Order: Bucerotiformes

Family: Bucerotidae

Scientific name: *Buceros rhinoceros silvestris*

Common name: Rhinoceros hornbill

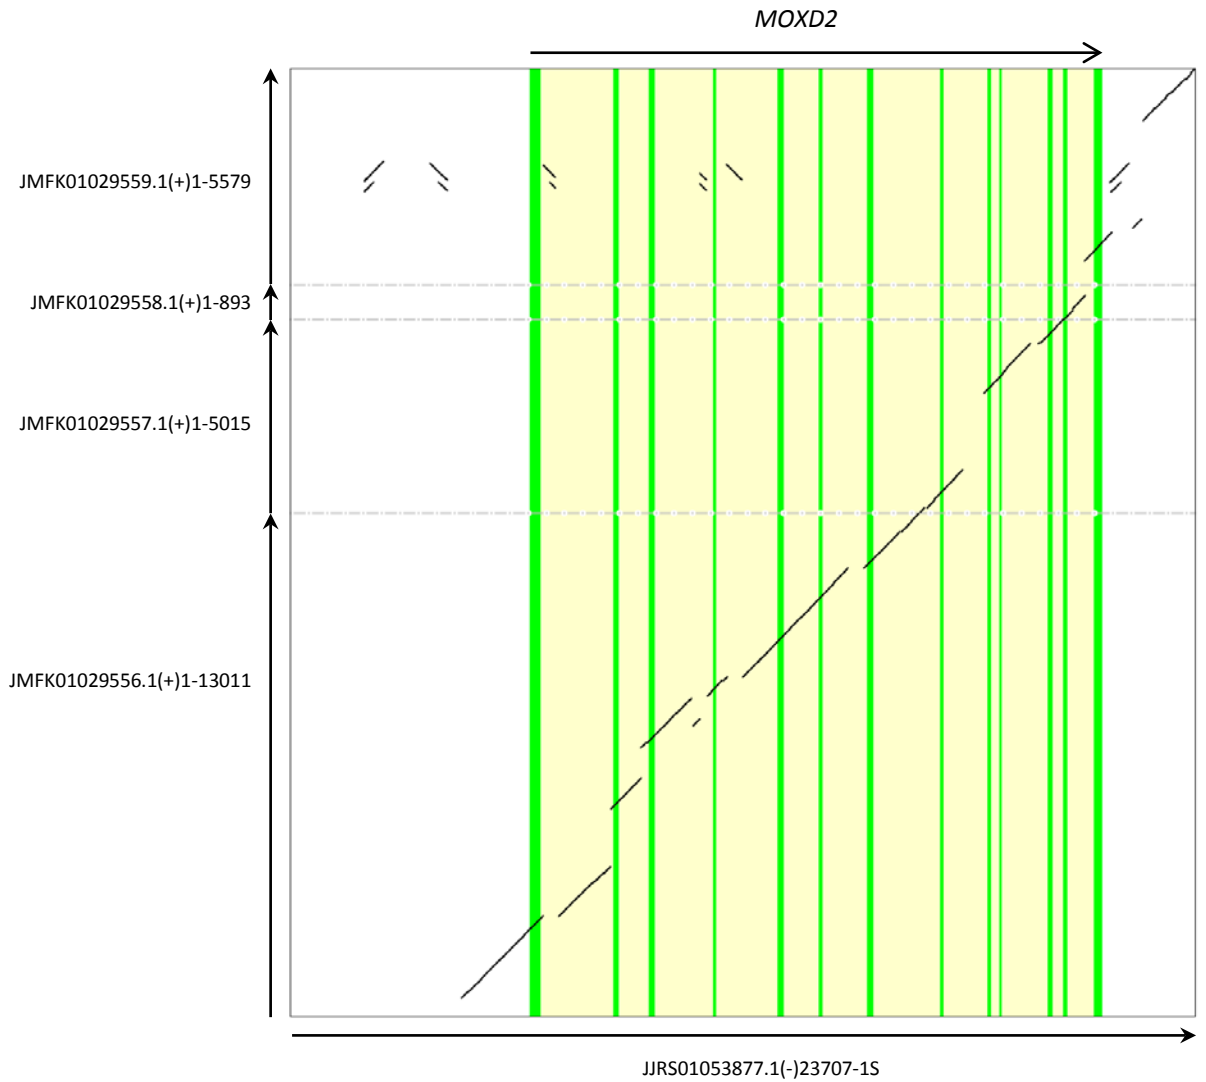

Order: Passeriformes

Family: Acanthisittidae

Scientific name: *Acanthisitta chloris*

Common name: Rifleman

No. 21

Order: Trogoniformes

Family: Trogonidae

Scientific name: *Apaloderma vittatum*

Common name: Bar-tailed trogon

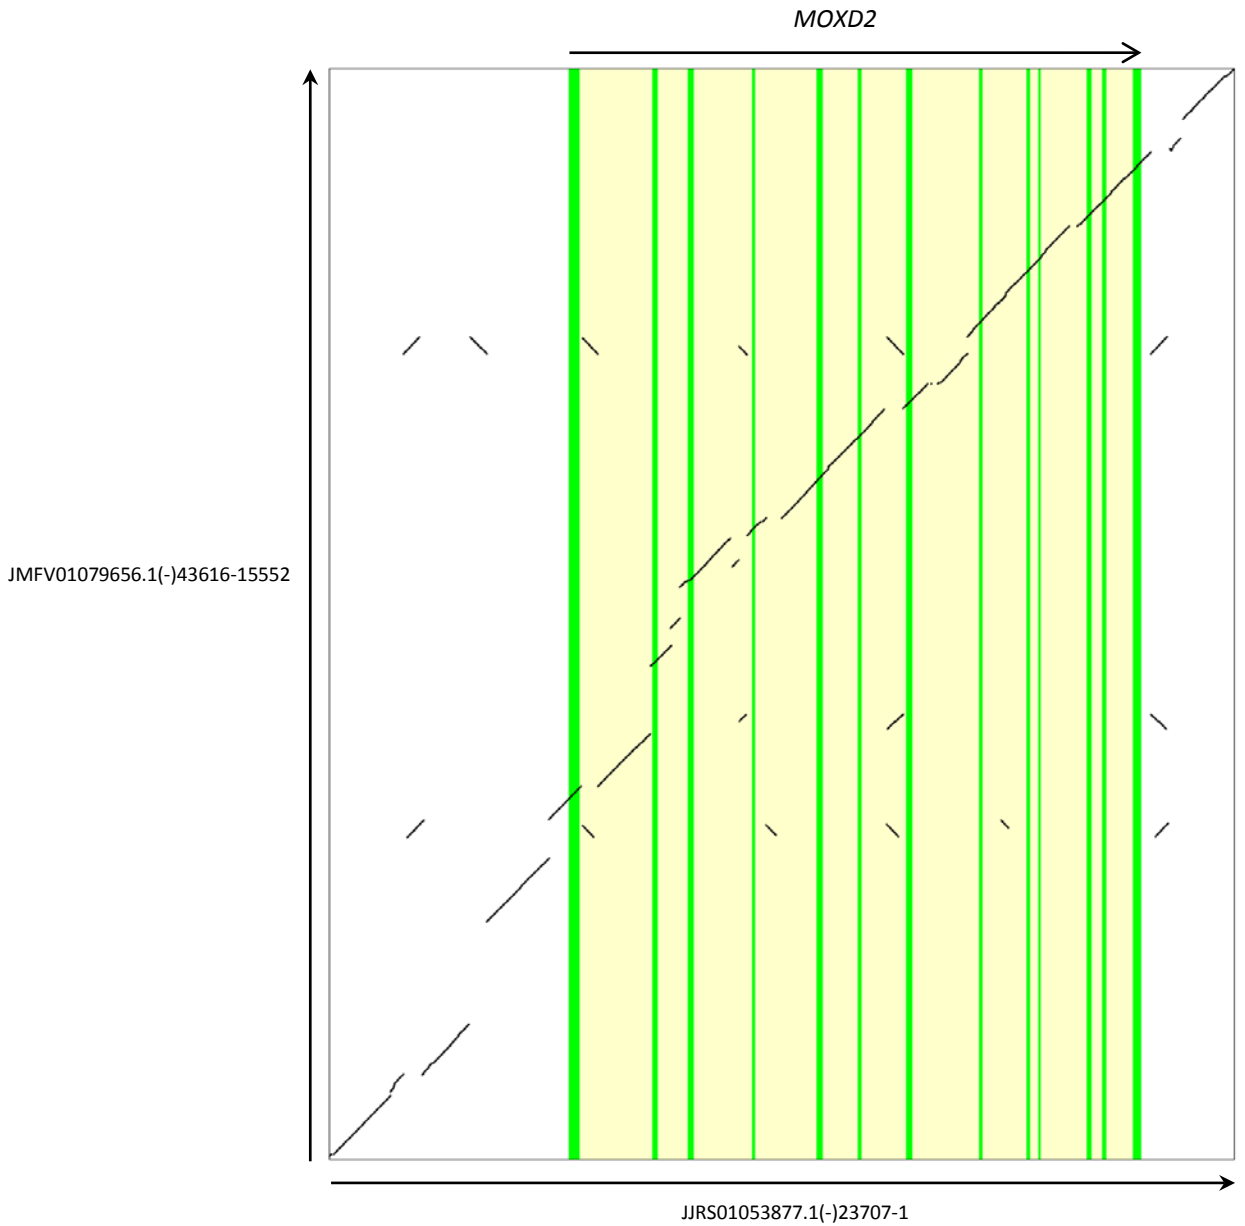

Order: Passeriformes

Family: Acanthisittidae

Scientific name: *Acanthisitta chloris*

Common name: Rifleman

No. 22

Order: Leptosomiformes

Family: Leptosomidae

Scientific name: *Leptosomus discolor*

Common name: Cuckoo roller

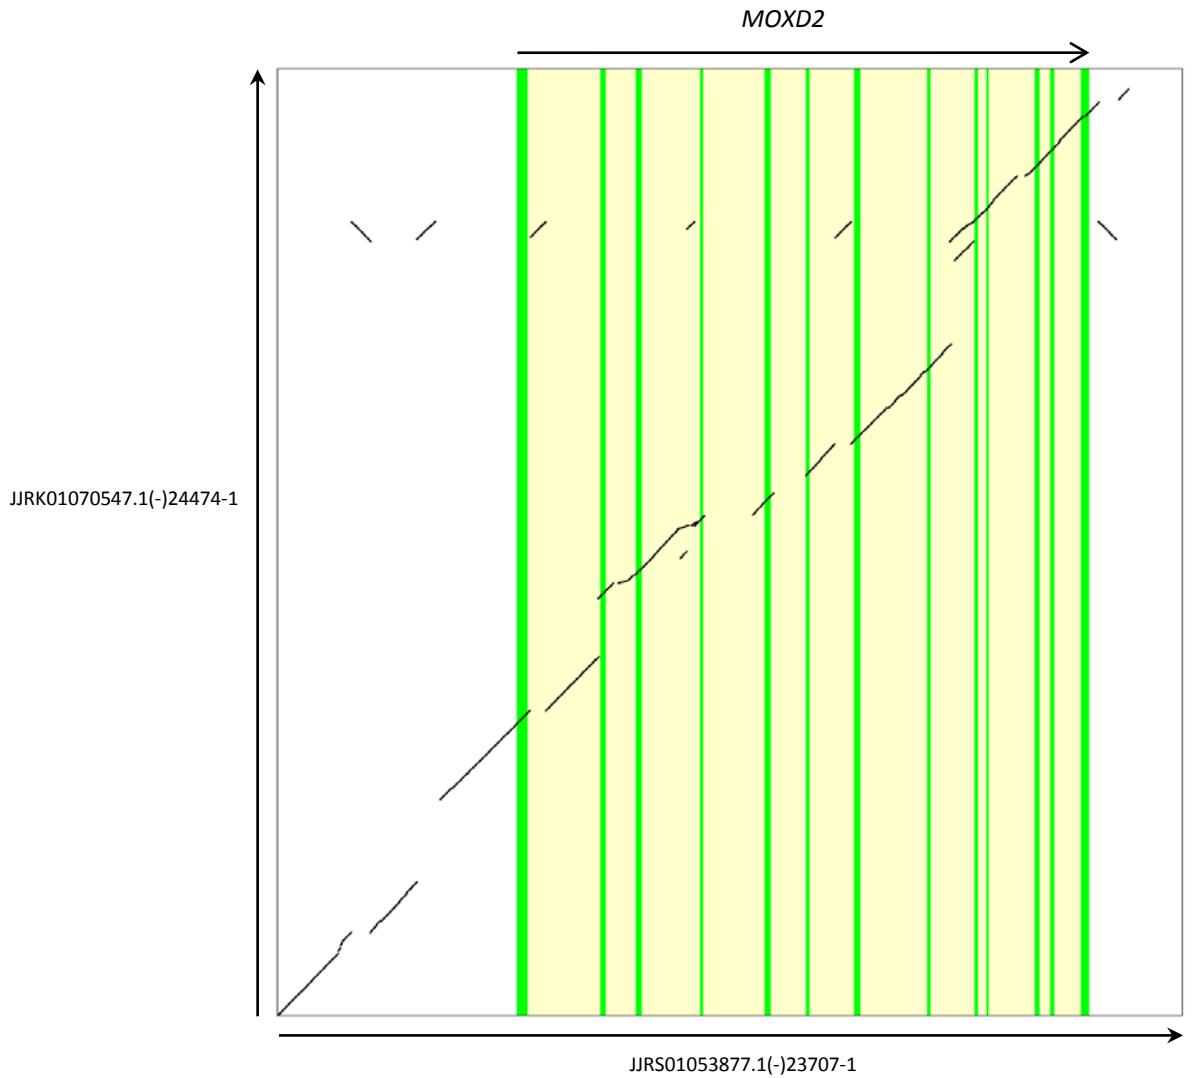

Order: Passeriformes

Family: Acanthisittidae

Scientific name: *Acanthisitta chloris*

Common name: Rifleman

No. 23

Order: Coliiformes

Family: Coliidae

Scientific name: *Colius striatus*

Common name: Speckled mousebird

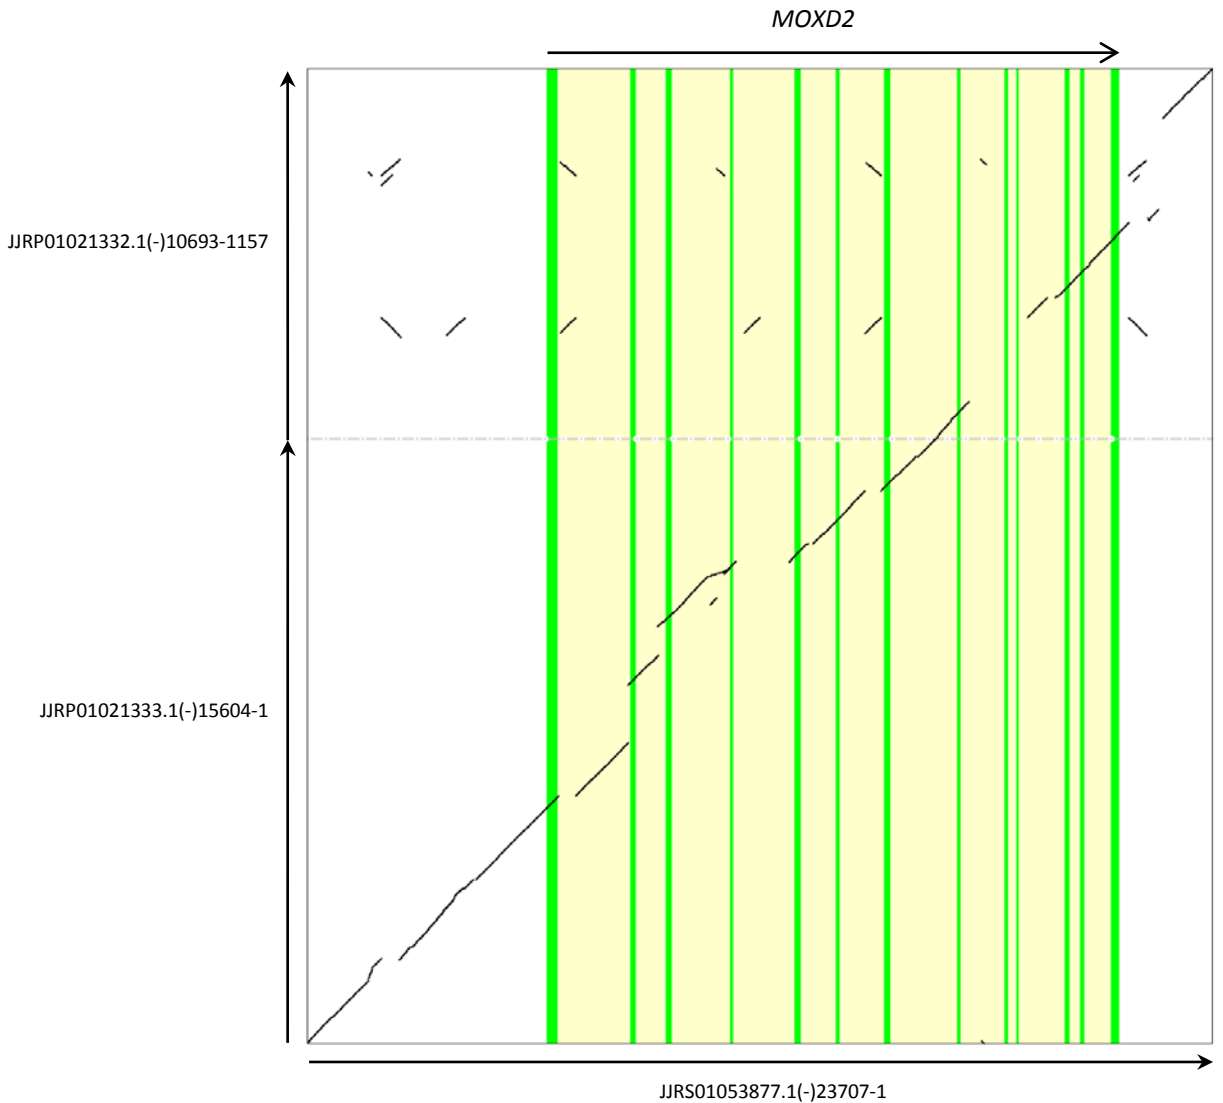

Order: Passeriformes

Family: Acanthisittidae

Scientific name: *Acanthisitta chloris*

Common name: Rifleman

No. 24  
Order: Strigiformes  
Family: Tytonidae  
Scientific name: *Tyto alba*  
Common name: Barn owl

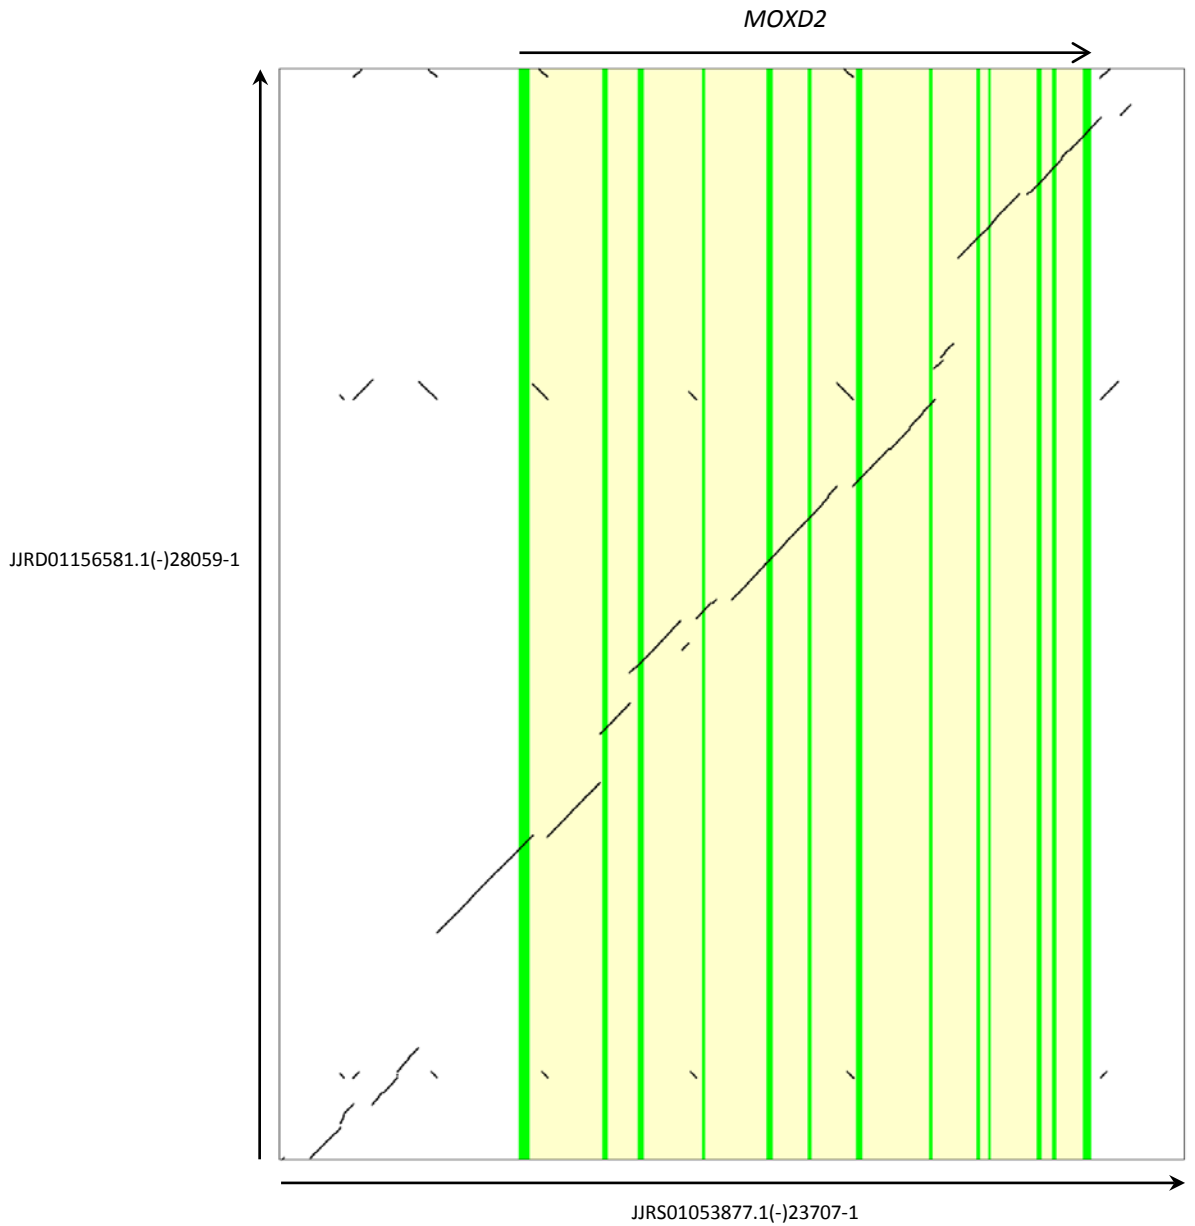

Order: Passeriformes  
Family: Acanthisittidae  
Scientific name: *Acanthisitta chloris*  
Common name: Rifleman



No. 25  
Order: Accipitriformes  
Family: Cathartidae  
Scientific name: *Cathartes aura*  
Common name: Turkey vulture

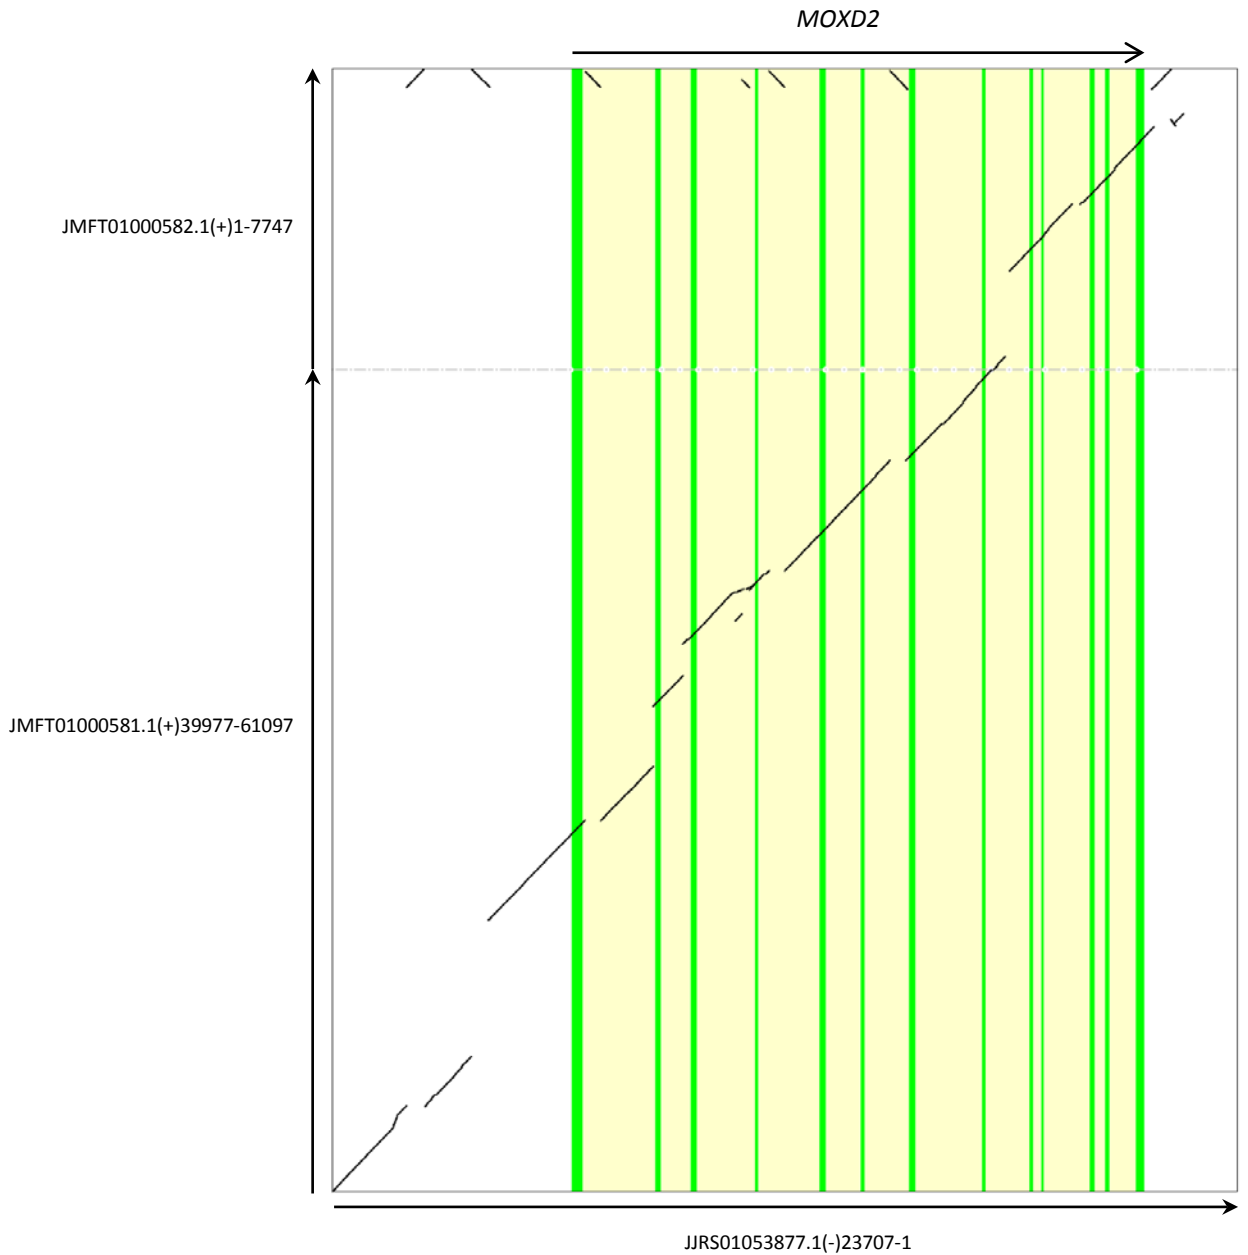

Order: Passeriformes  
Family: Acanthisittidae  
Scientific name: *Acanthisitta chloris*  
Common name: Rifleman

No. 26

Order: Accipitriformes

Family: Accipitridae

Scientific name: *Haliaeetus albicilla*

Common name: White-tailed eagle

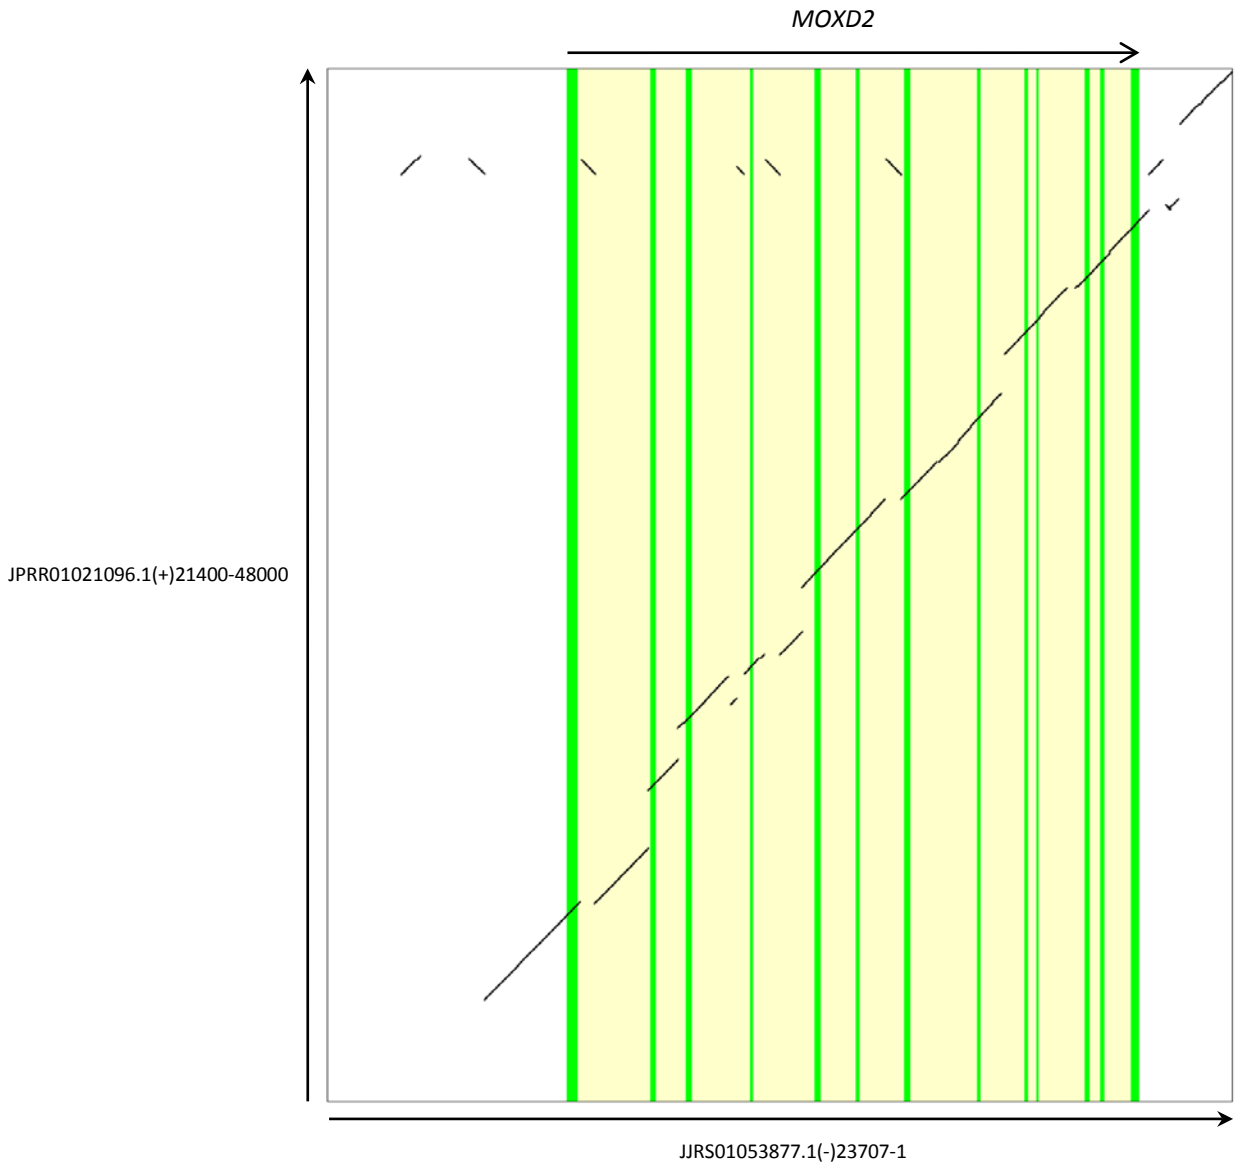

Order: Passeriformes

Family: Acanthisittidae

Scientific name: *Acanthisitta chloris*

Common name: Rifleman

No. 27

Order: Accipitriformes

Family: Accipitridae

Scientific name: *Aquila chrysaetos canadensis*

Common name: Golden eagle

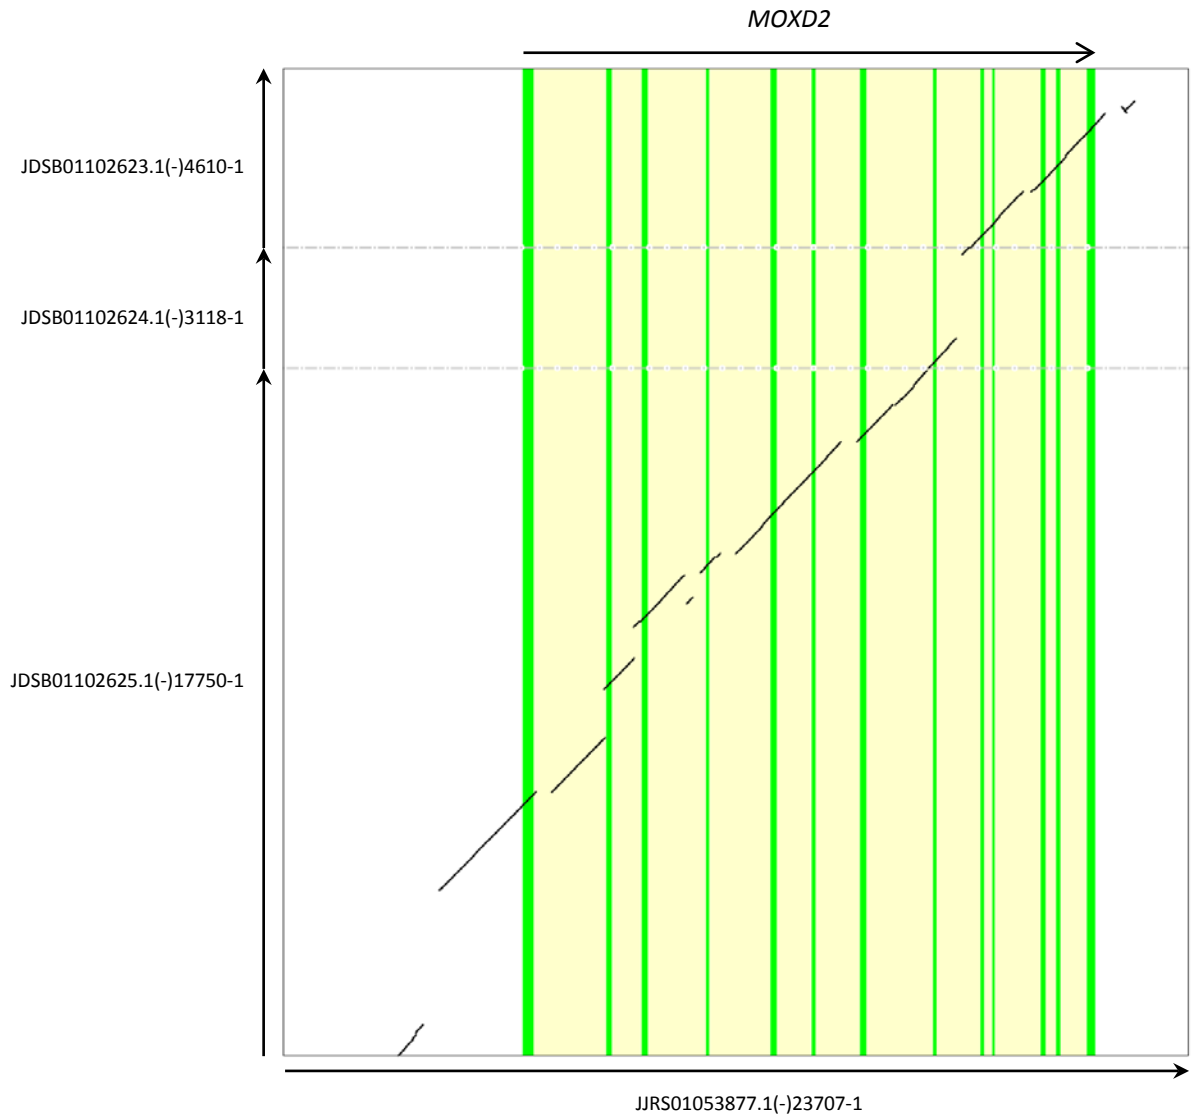

Order: Passeriformes

Family: Acanthisittidae

Scientific name: *Acanthisitta chloris*

Common name: Rifleman

No. 28

Order: Phaethontiformes

Family: Phaethontidae

Scientific name: *Phaethon lepturus*

Common name: White-tailed tropicbird

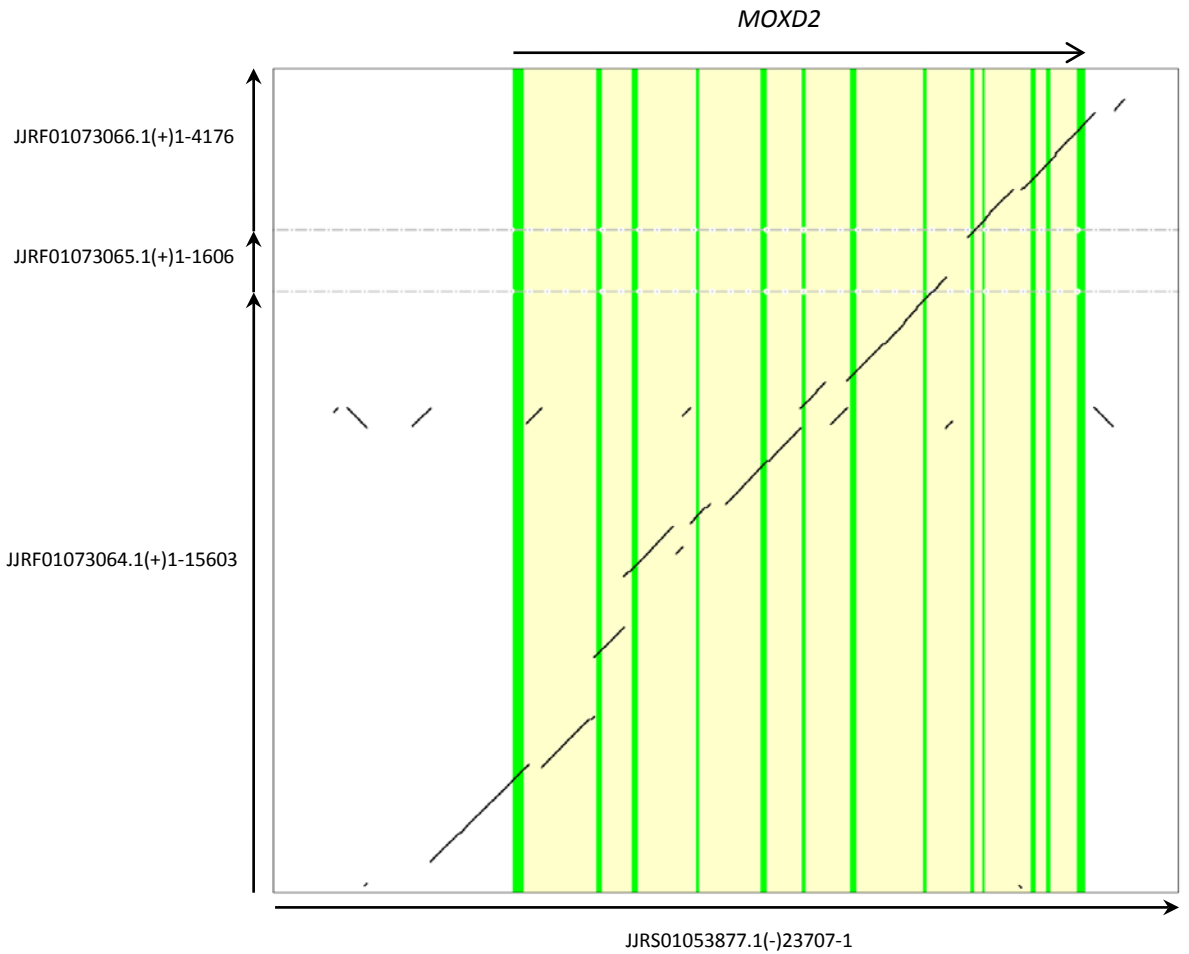

Order: Passeriformes

Family: Acanthisittidae

Scientific name: *Acanthisitta chloris*

Common name: Rifleman

No. 29

Order: Eurypygiformes

Family: Eurypygidae

Scientific name: *Eurypyga helias*

Common name: Sunbittern

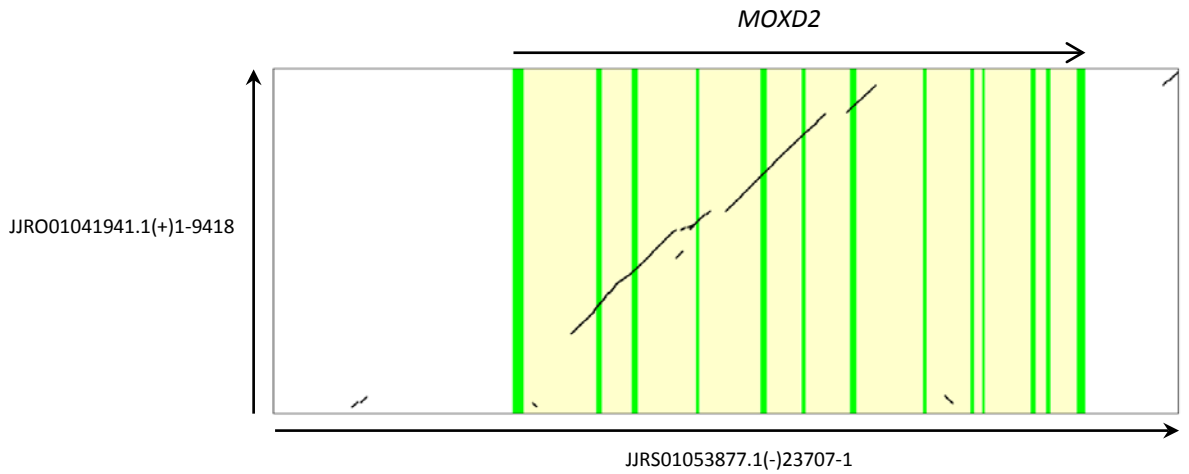

Order: Passeriformes

Family: Acanthisittidae

Scientific name: *Acanthisitta chloris*

Common name: Rifleman

No. 30

Order: Gaviiformes

Family: Gaviidae

Scientific name: *Gavia stellata*

Common name: Red-throated loon

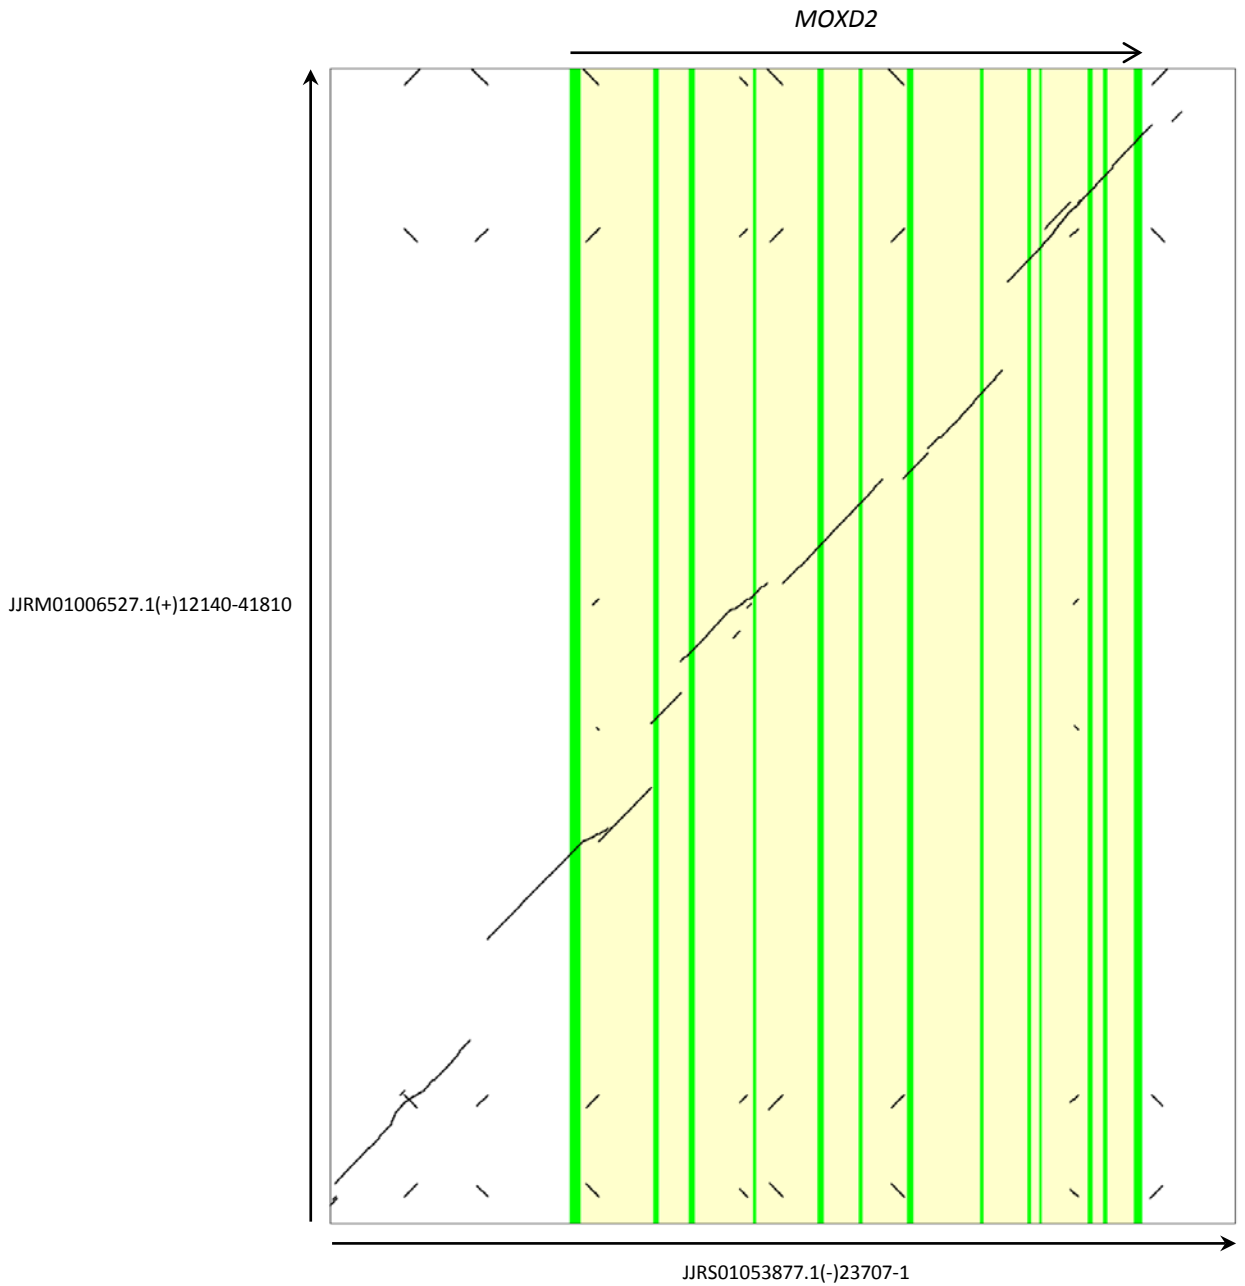

Order: Passeriformes

Family: Acanthisittidae

Scientific name: *Acanthisitta chloris*

Common name: Rifleman

No. 31

Order: Sphenisciformes

Family: Spheniscidae

Scientific name: *Aptenodytes forsteri*

Common name: Emperor penguin

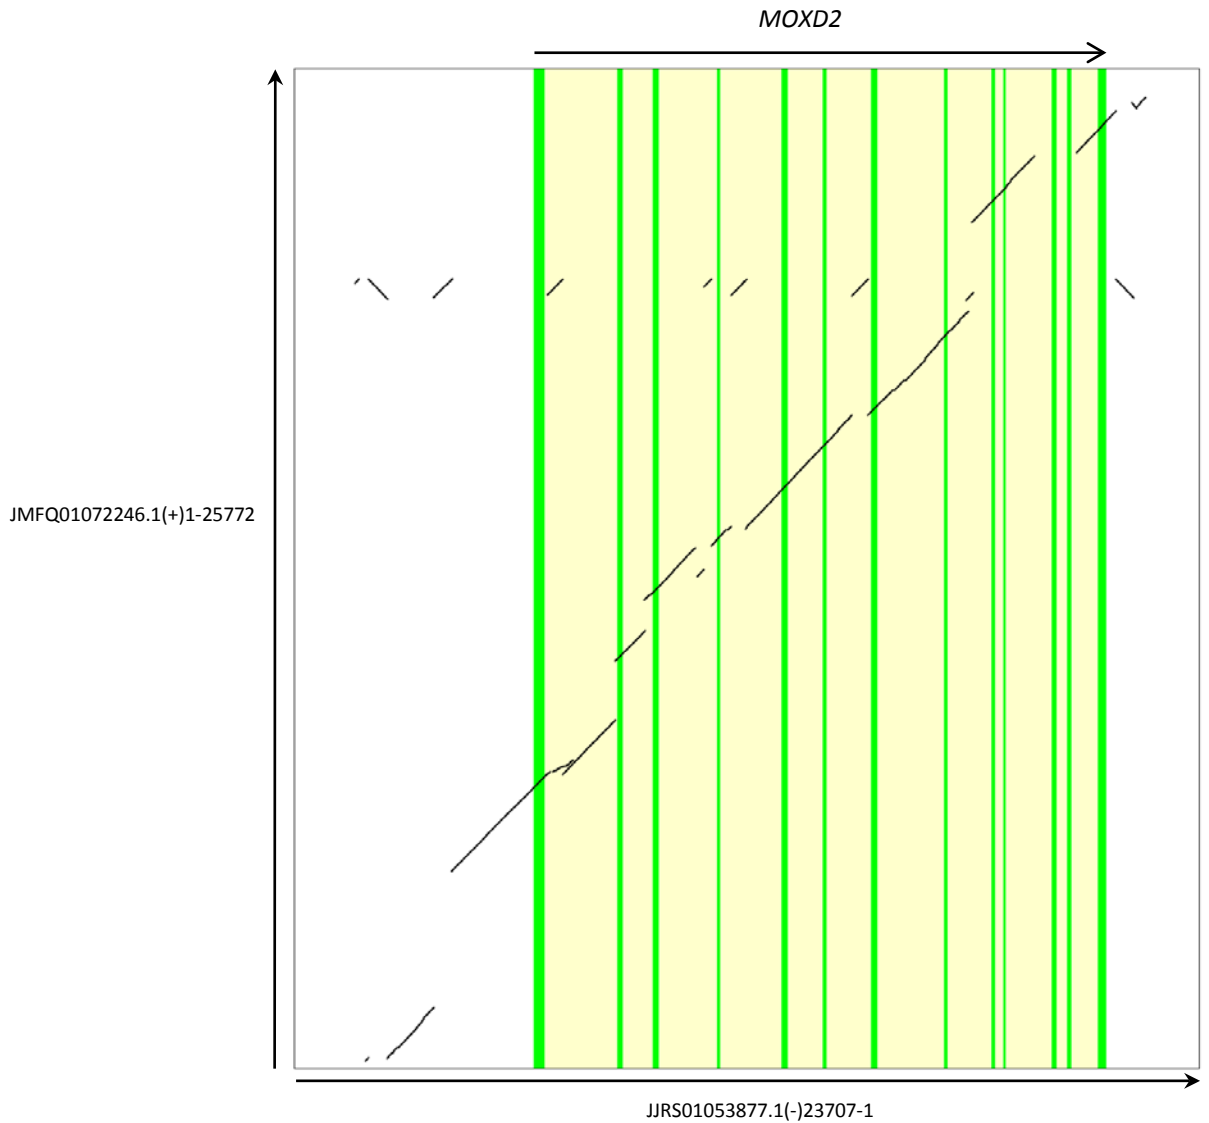

Order: Passeriformes

Family: Acanthisittidae

Scientific name: *Acanthisitta chloris*

Common name: Rifleman

No. 32

Order: Sphenisciformes

Family: Spheniscidae

Scientific name: *Pygoscelis adeliae*

Common name: Adelie Penguin

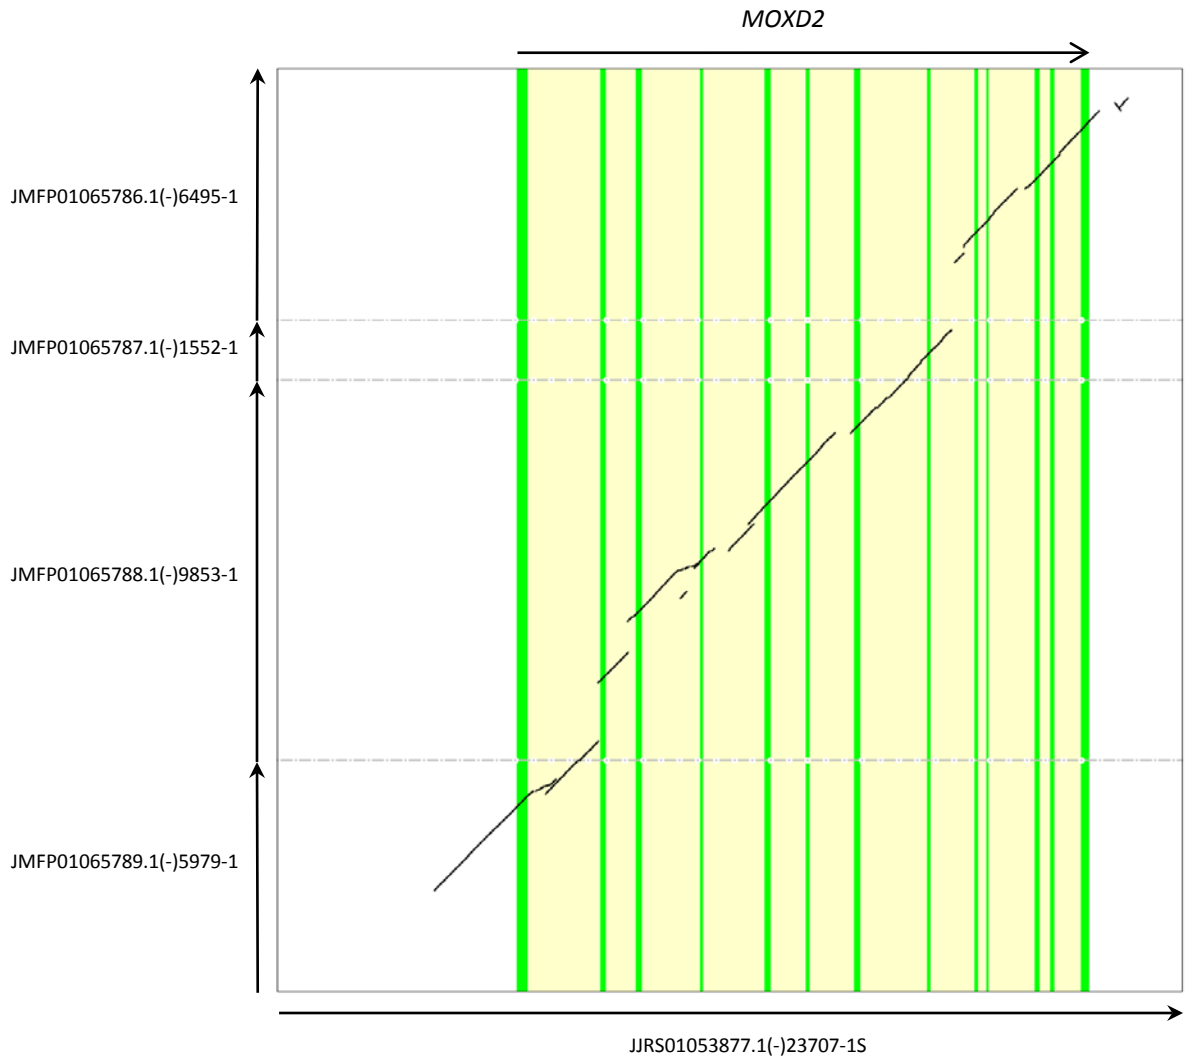

Order: Passeriformes

Family: Acanthisittidae

Scientific name: *Acanthisitta chloris*

Common name: Rifleman



No. 33

Order: Procellariiformes

Family: Procellariidae

Scientific name: *Fulmarus glacialis*

Common name: Northern fulmar

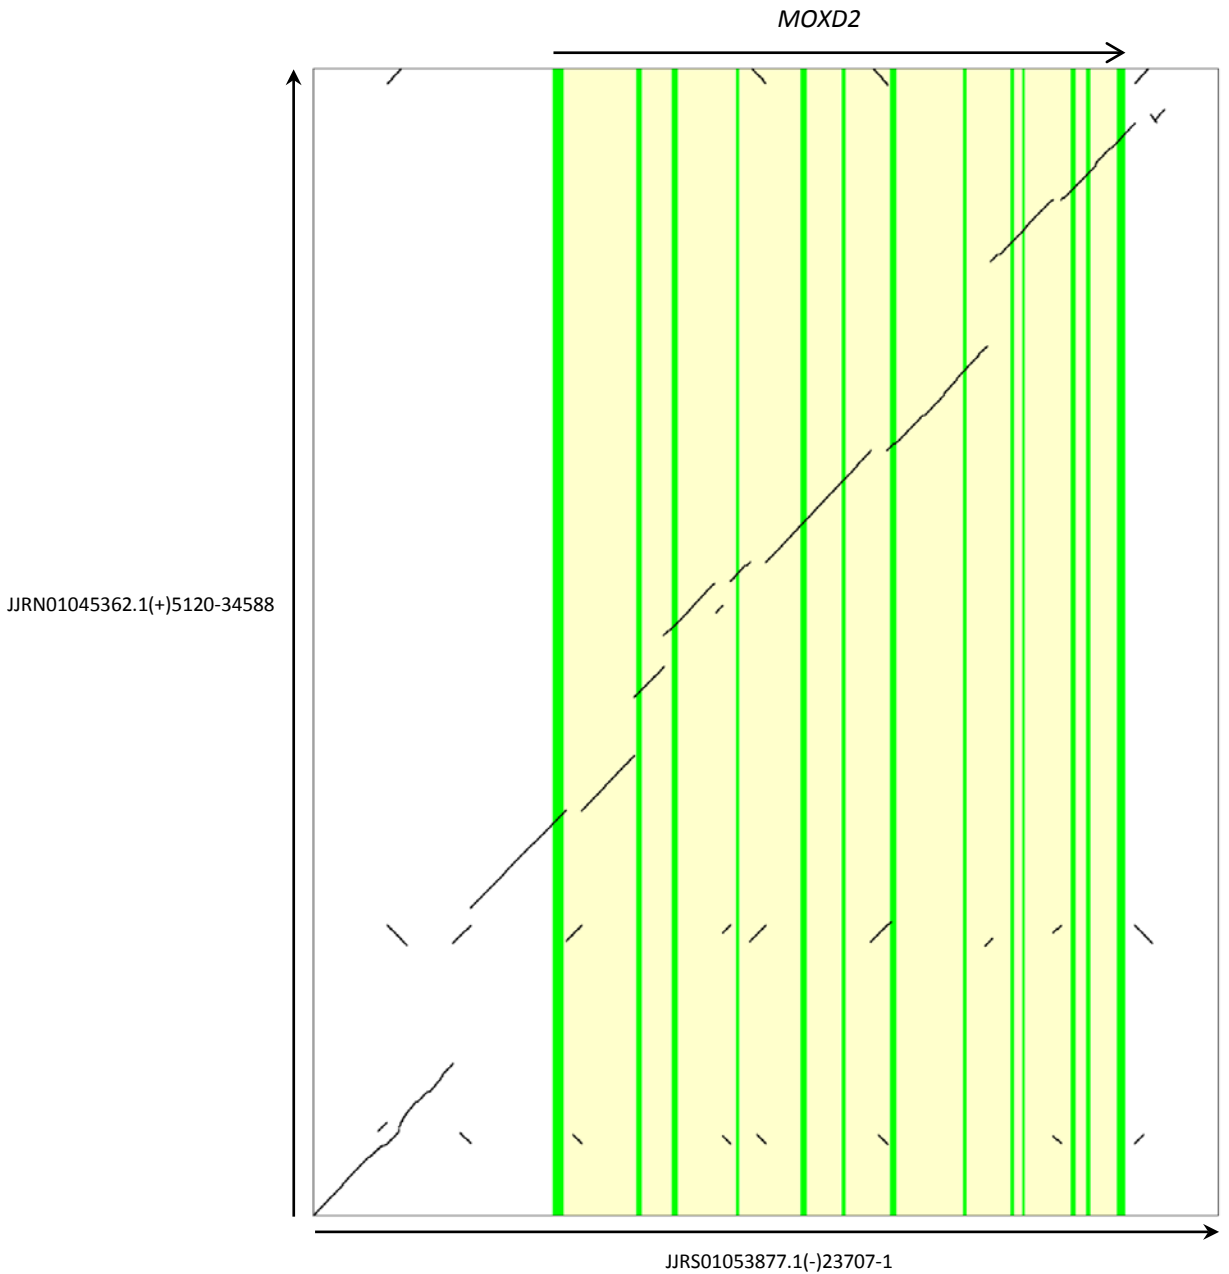

Order: Passeriformes

Family: Acanthisittidae

Scientific name: *Acanthisitta chloris*

Common name: Rifleman

No. 34

Order: Suliformes

Family: Phalacrocoracidae

Scientific name: *Phalacrocorax carbo*

Common name: Great cormorant

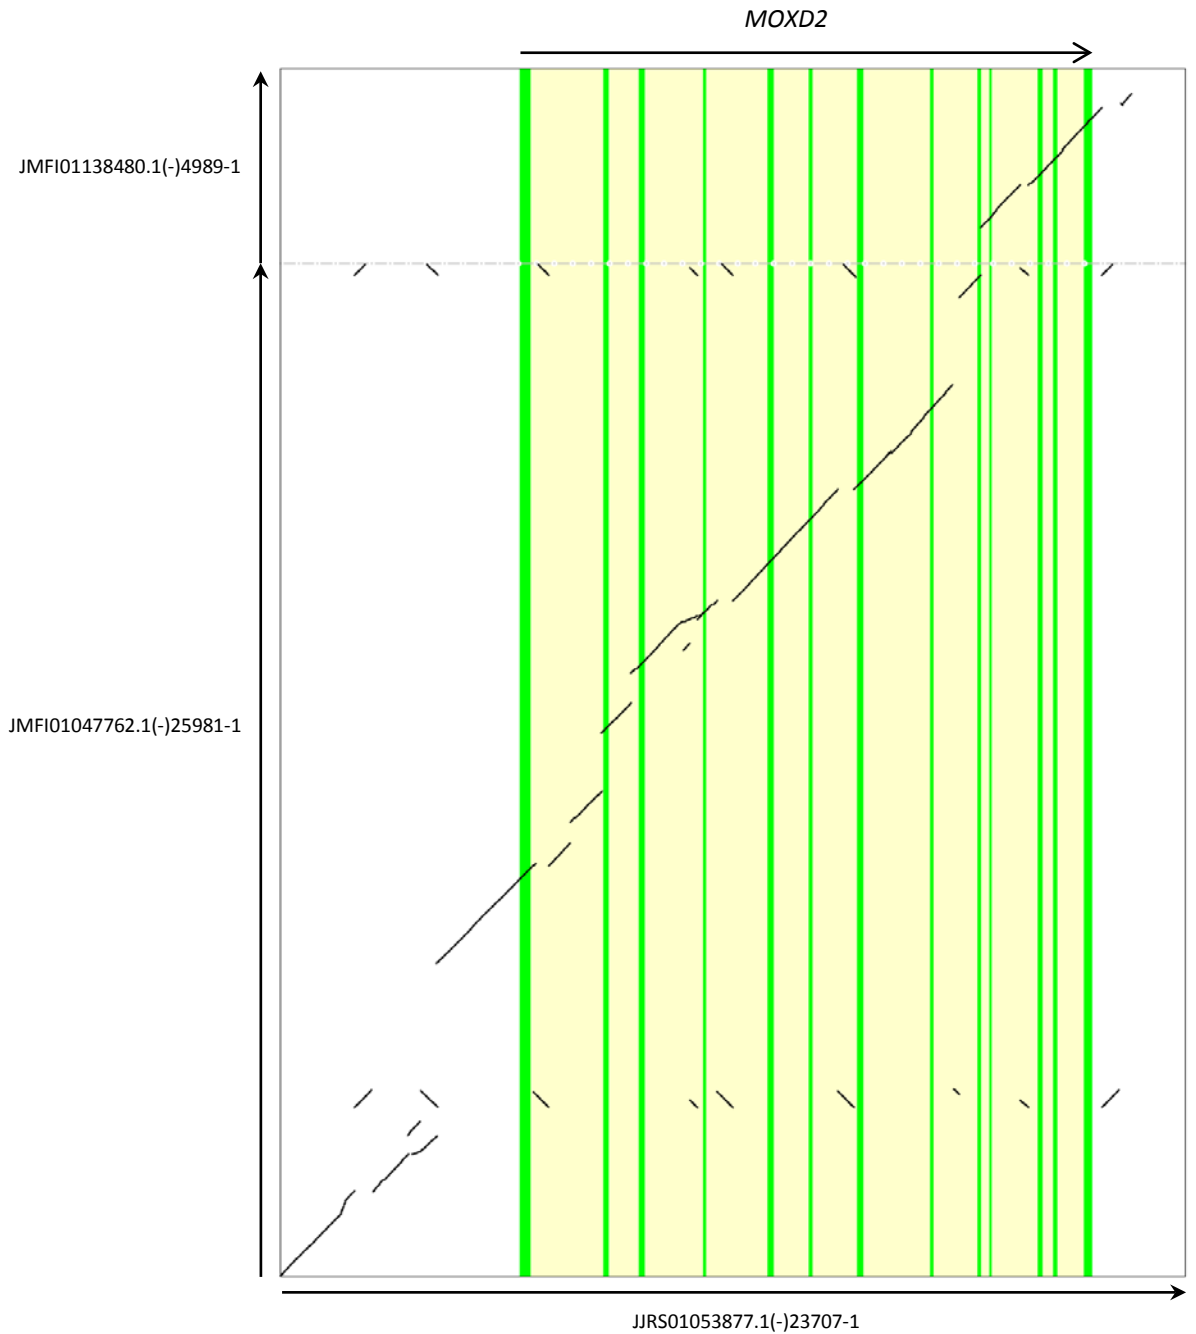

Order: Passeriformes

Family: Acanthisittidae

Scientific name: *Acanthisitta chloris*

Common name: Rifleman

No. 35

Order: Pelecaniformes

Family: Threskiornithidae

Scientific name: *Nipponia nippon*

Common name: Crested ibis

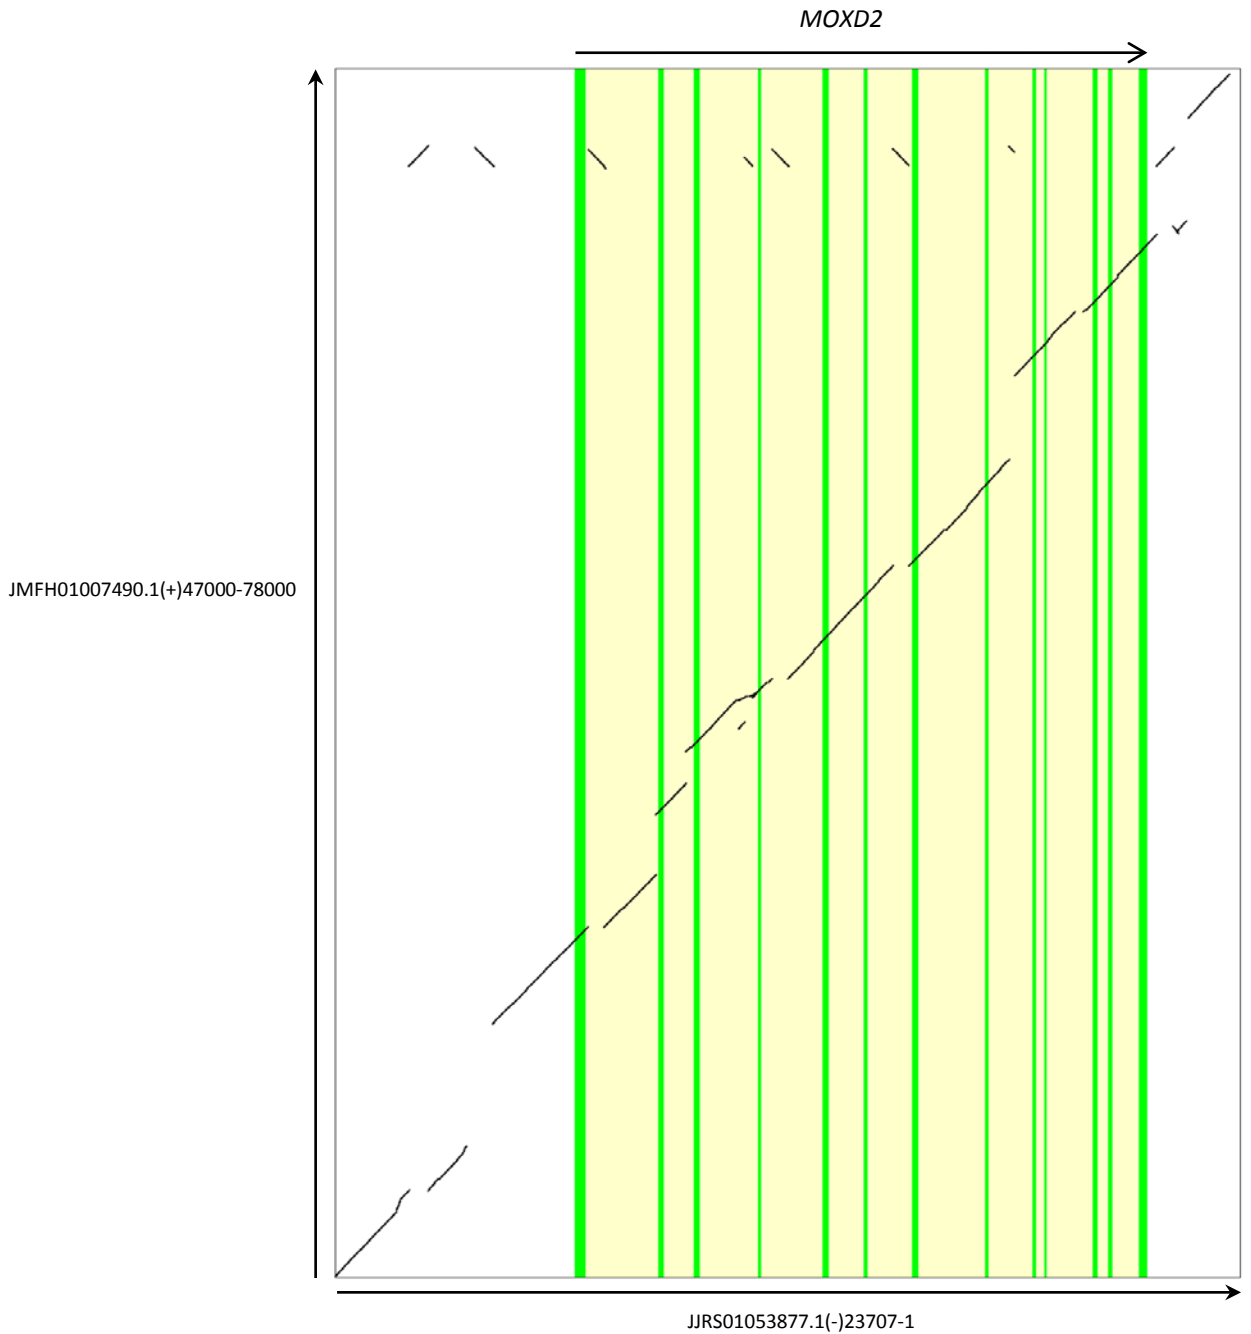

Order: Passeriformes

Family: Acanthisittidae

Scientific name: *Acanthisitta chloris*

Common name: Rifleman

No. 36

Order: Pelecaniformes

Family: Ardeidae

Scientific name: *Egretta garzetta*

Common name: Little egret

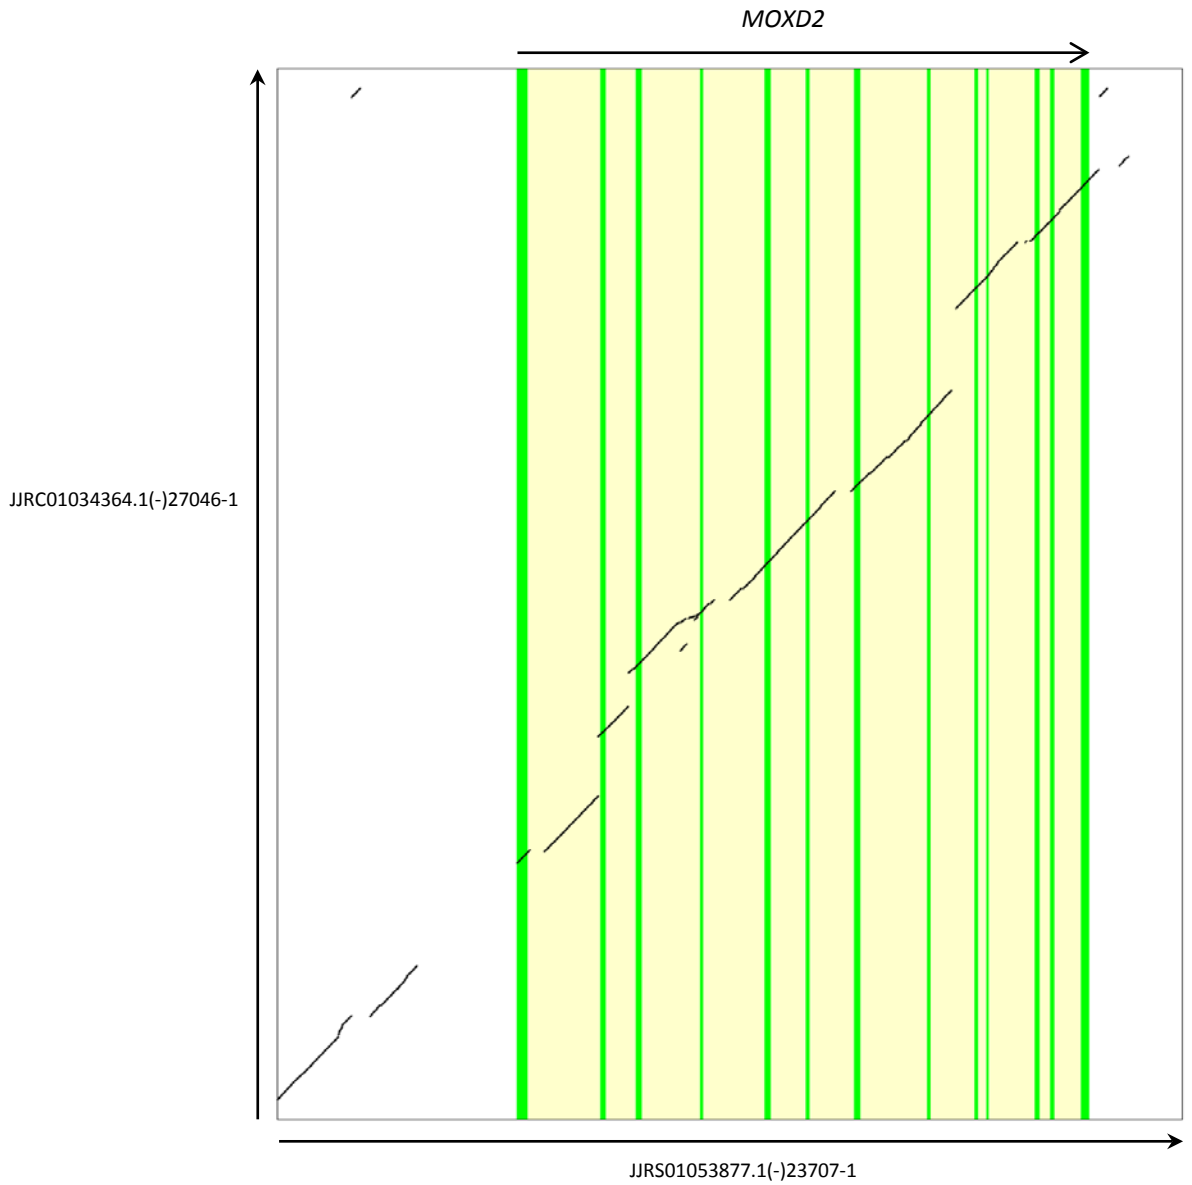

Order: Passeriformes

Family: Acanthisittidae

Scientific name: *Acanthisitta chloris*

Common name: Rifleman

No. 37  
Order: Charadriiformes  
Family: Charadriidae  
Scientific name: *Charadrius vociferus*  
Common name: Killdeer

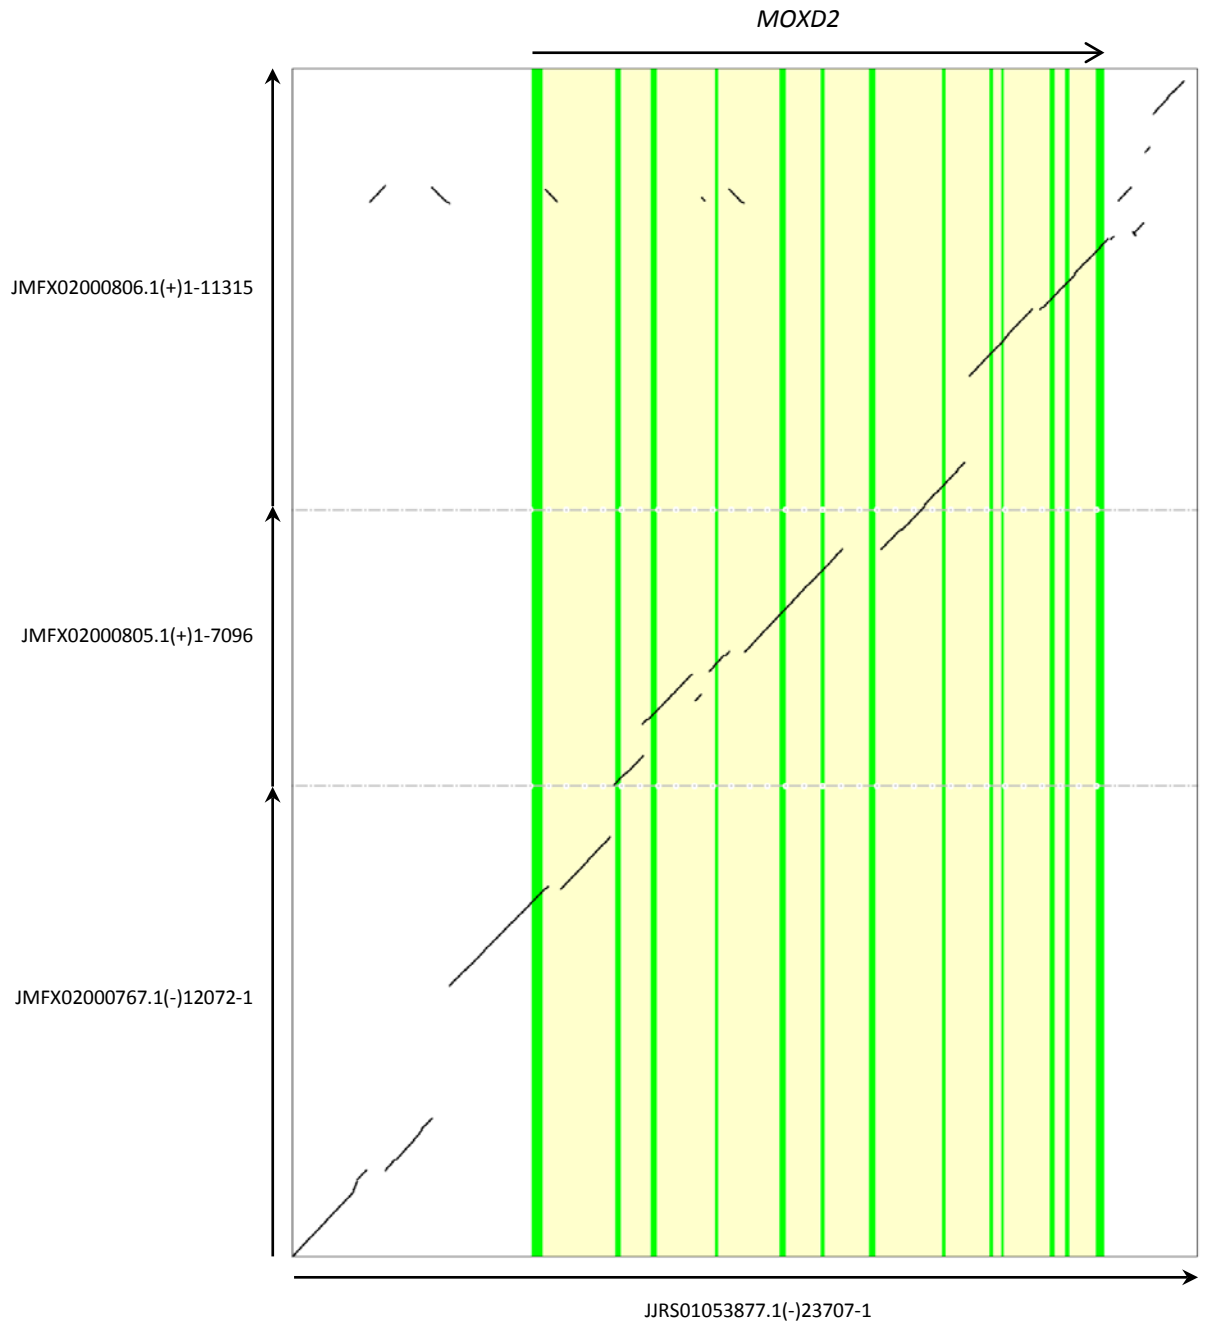

Order: Passeriformes  
Family: Acanthisittidae  
Scientific name: *Acanthisitta chloris*  
Common name: Rifleman

No. 38

Order: Gruiformes

Family: Gruidae

Scientific name: *Balearica pavonina gibbericeps*

Common name: East African crowned crane

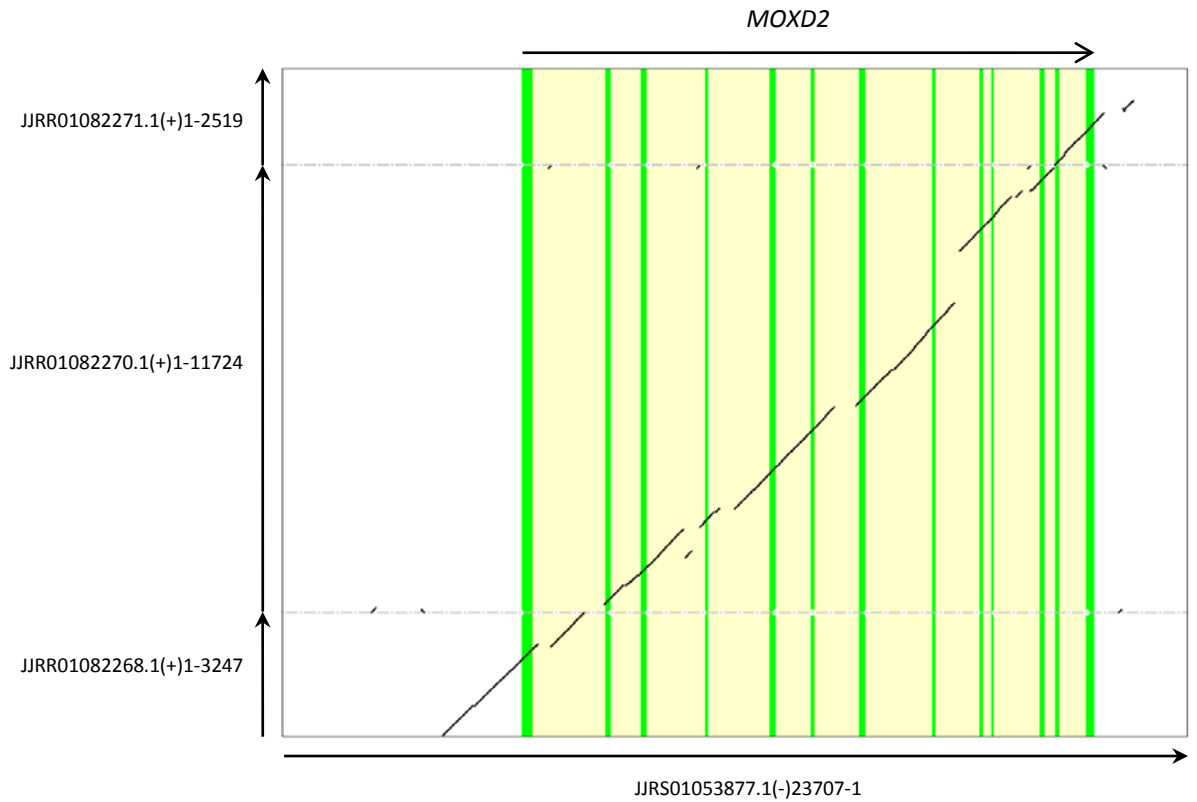

Order: Passeriformes

Family: Acanthisittidae

Scientific name: *Acanthisitta chloris*

Common name: Rifleman

No. 39

Order: Opisthocomiformes

Family: Opisthocomidae

Scientific name: *Opisthocomus hoazin*

Common name: Hoatzin

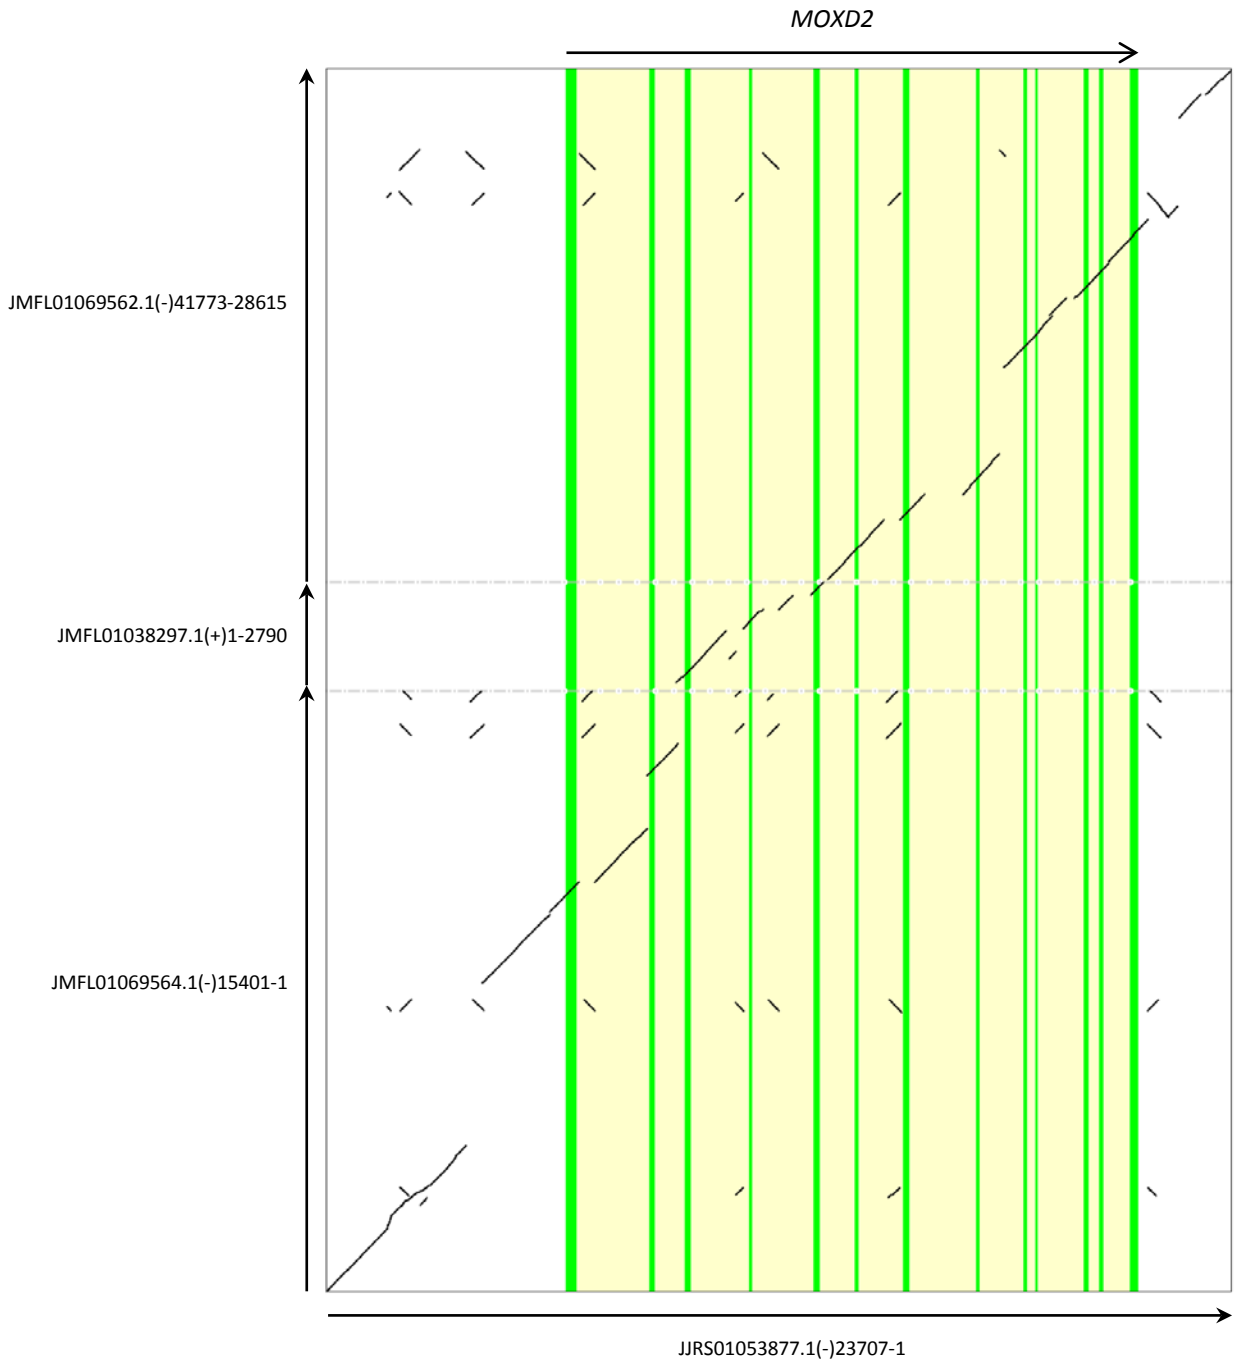

Order: Passeriformes

Family: Acanthisittidae

Scientific name: *Acanthisitta chloris*

Common name: Rifleman

No. 40

Order: Musophagiformes

Family: Musophagidae

Scientific name: *Tauraco erythrolophus*

Common name: Red-crested turaco

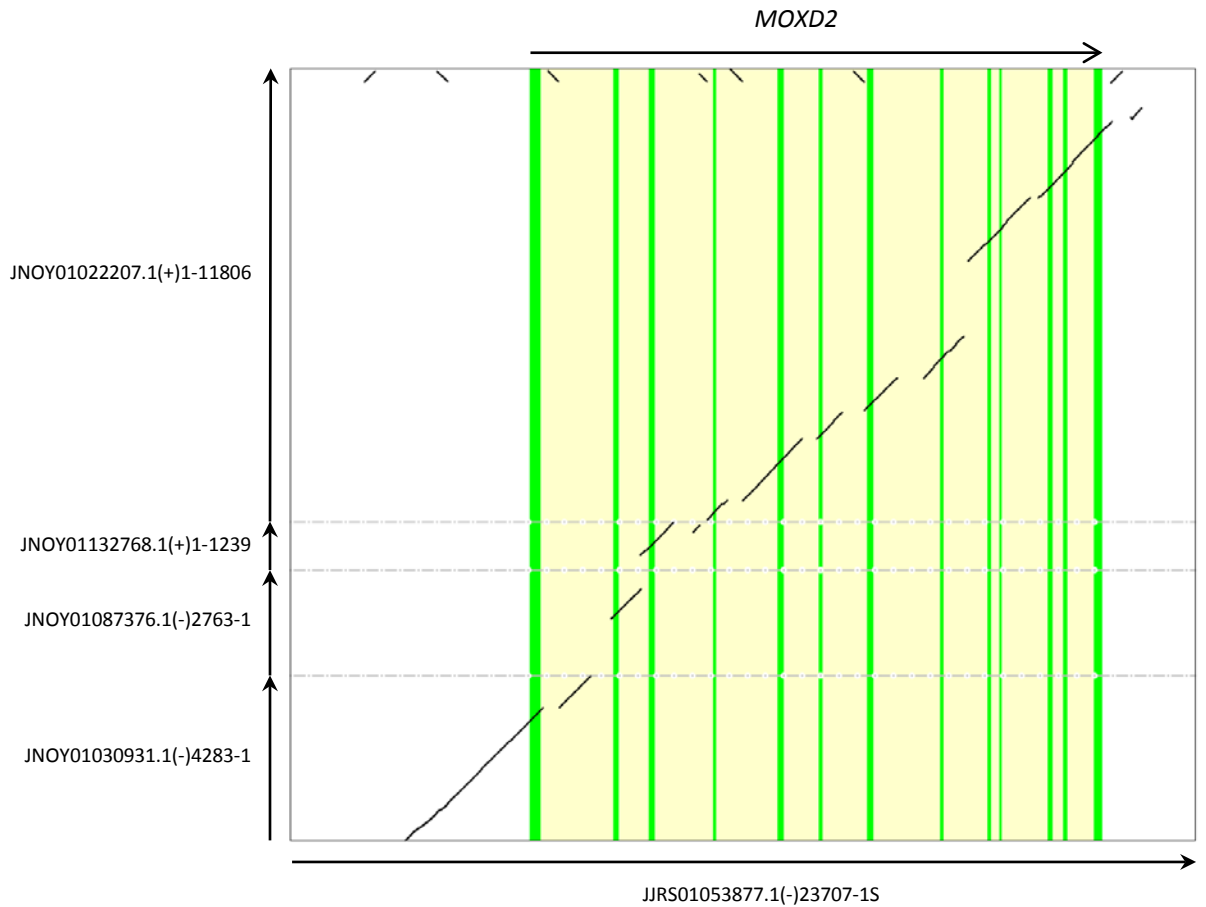

Order: Passeriformes

Family: Acanthisittidae

Scientific name: *Acanthisitta chloris*

Common name: Rifleman



No. 41

Order: Otidiformes

Family: Otididae

Scientific name: *Chlamydotis undulata macqueenii*

Common name: MacQueen's bustard

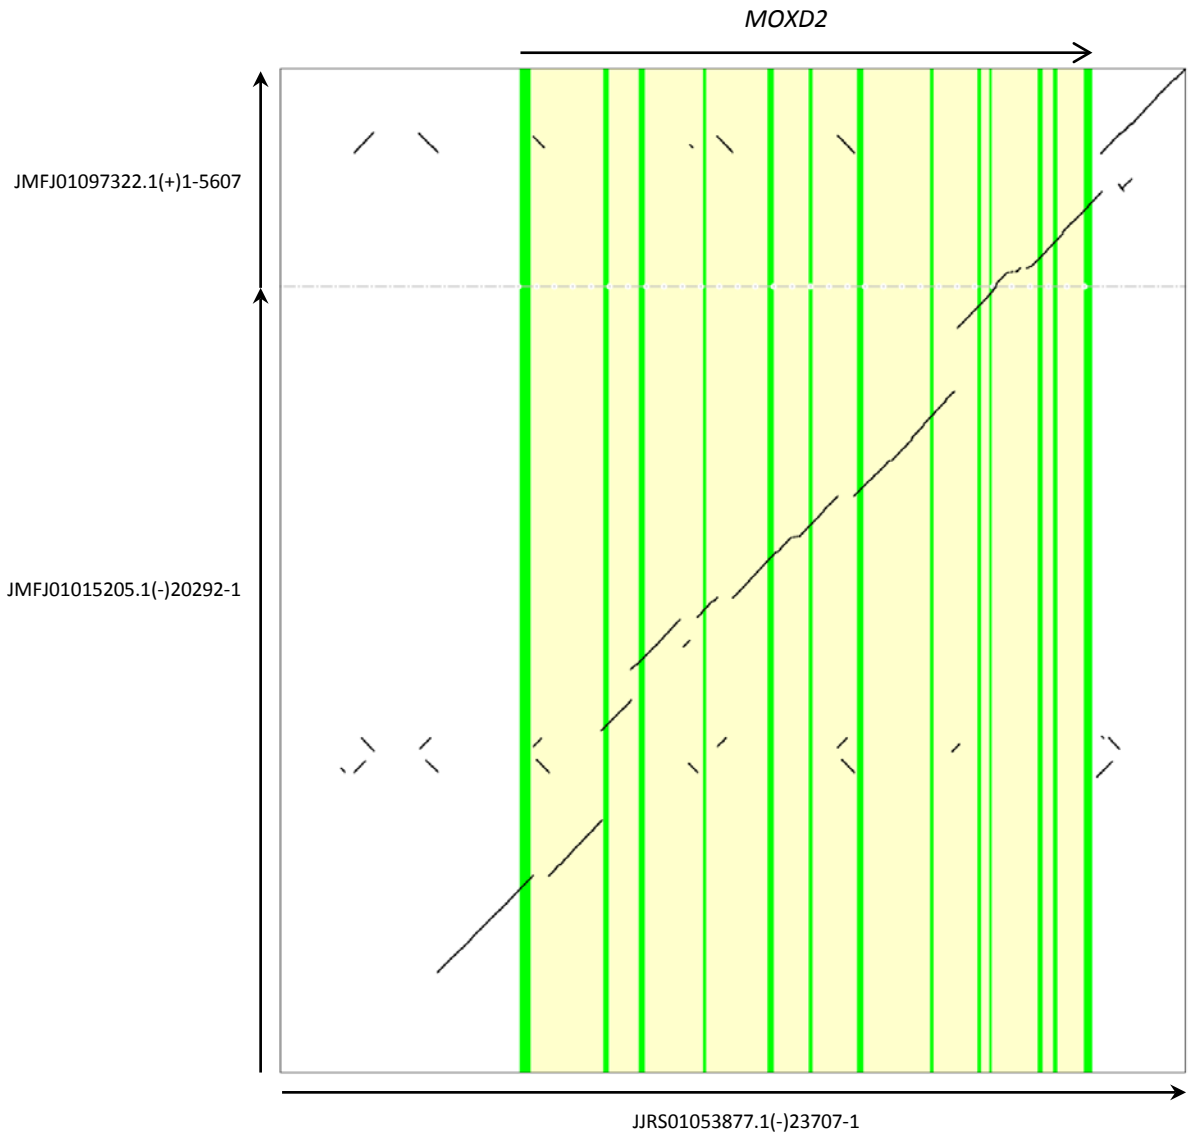

Order: Passeriformes

Family: Acanthisittidae

Scientific name: *Acanthisitta chloris*

Common name: Rifleman

No. 42

Order: Cuculiformes

Family: Cuculidae

Scientific name: *Cuculus canorus*

Common name: Common cuckoo

MOXD2

JNOX01069218.1(+)-1-8988

JNOX01069217.1(+)-31150-58678

JRS01053877.1(-)-23707-1

Order: Passeriformes

Family: Acanthisittidae

Scientific name: *Acanthisitta chloris*

Common name: Rifleman

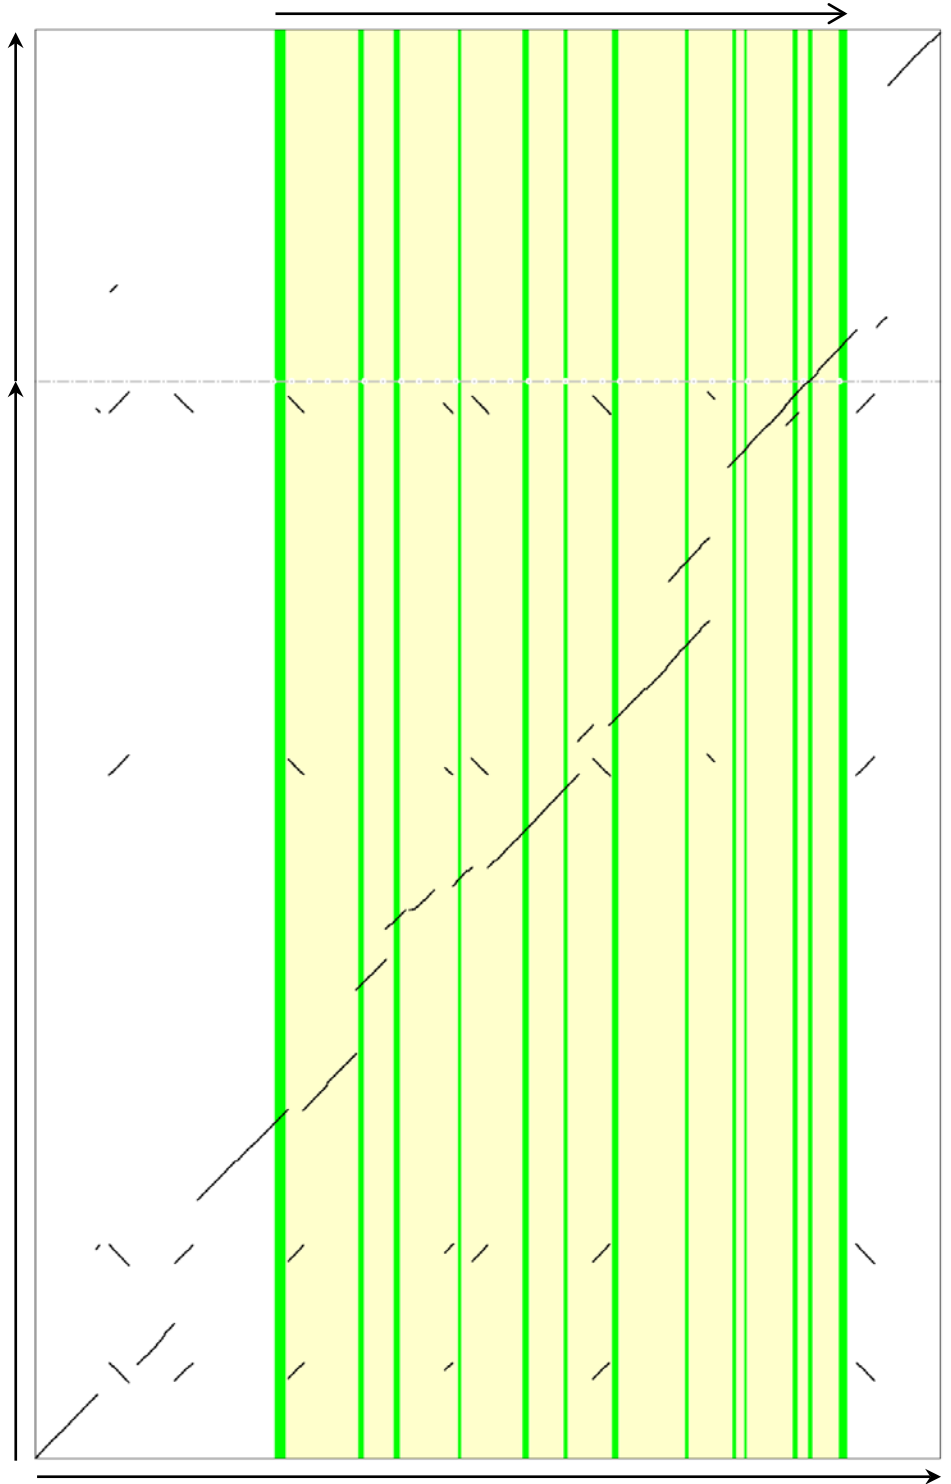

No. 43

Order: Caprimulgiformes

Family: Caprimulgidae

Scientific name: *Caprimulgus carolinensis*

Common name: Chuck-will's-widow

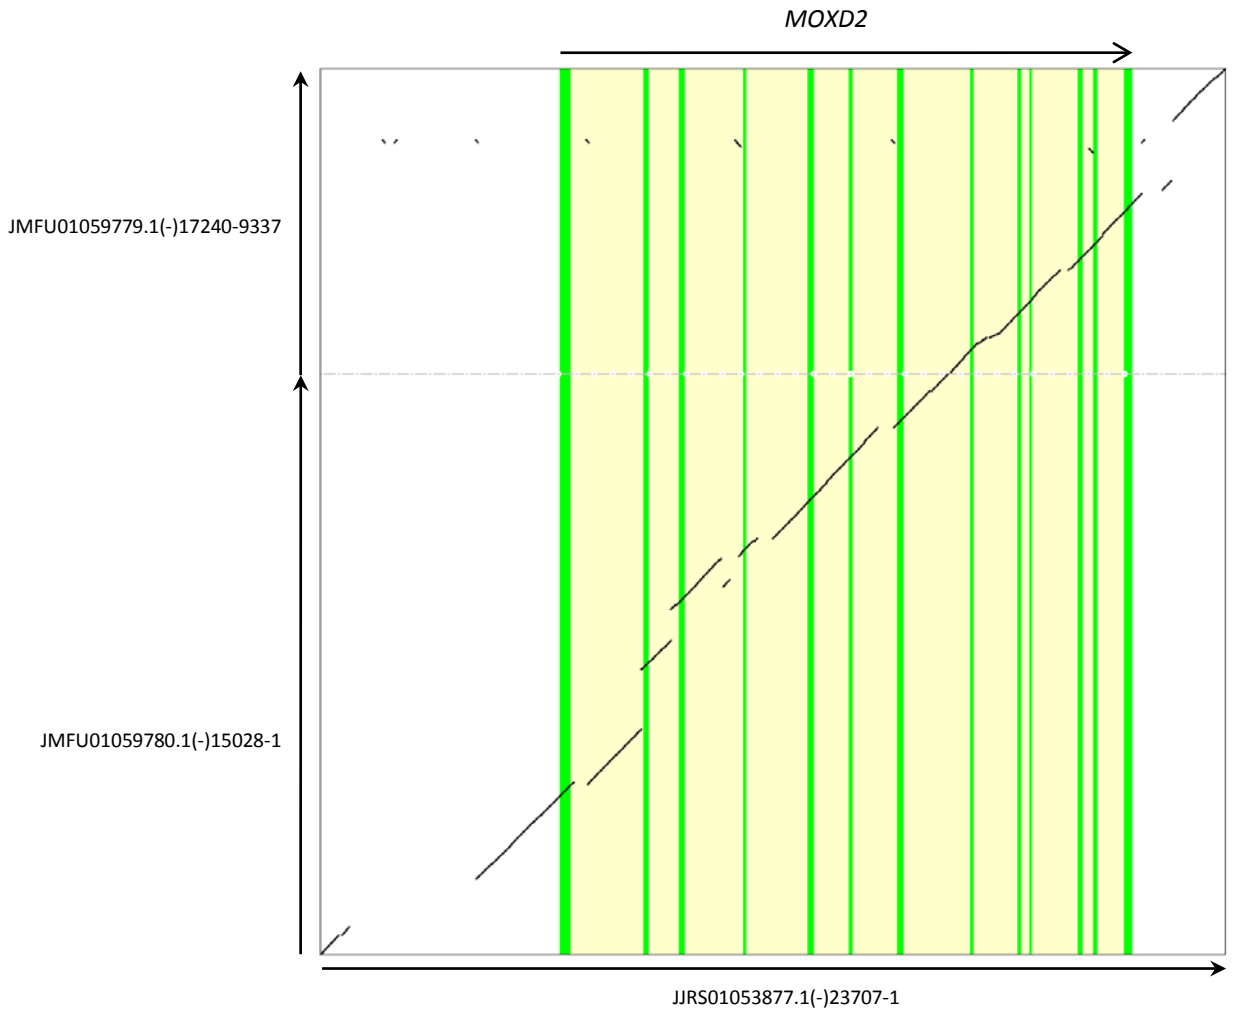

Order: Passeriformes

Family: Acanthisittidae

Scientific name: *Acanthisitta chloris*

Common name: Rifleman

No. 44

Order: Apodiformes

Family: Trochilidae

Scientific name: *Calypte anna*

Common name: Anna's hummingbird

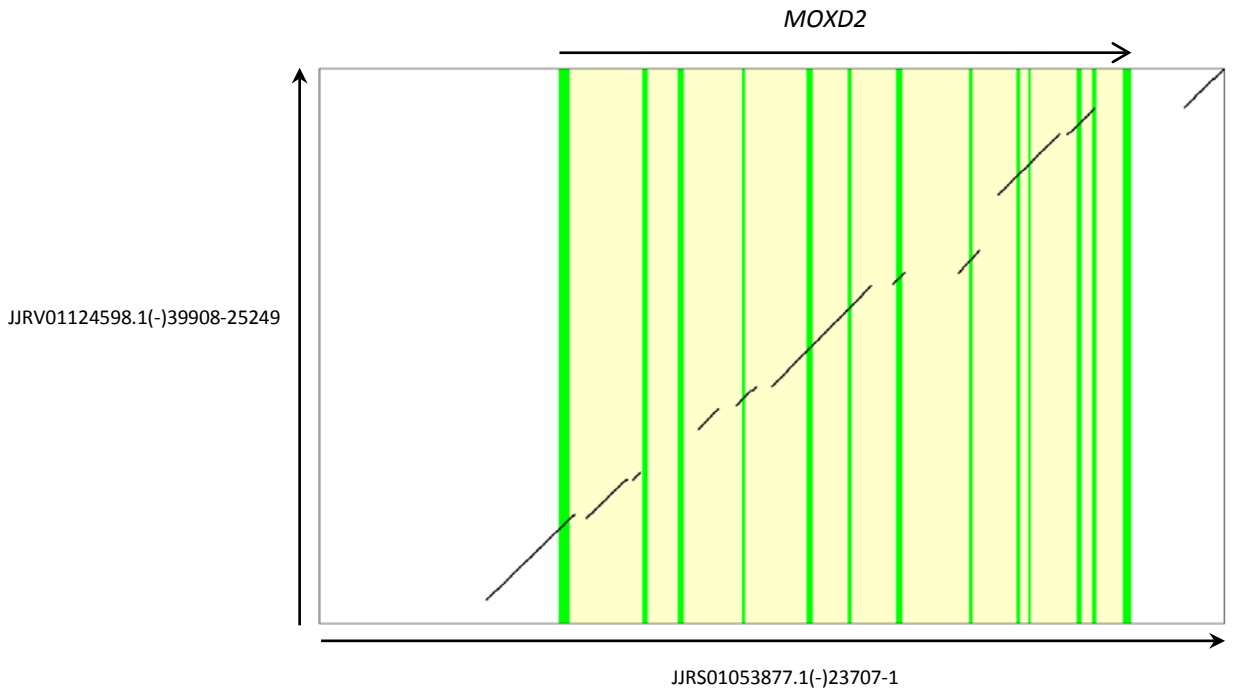

Order: Passeriformes

Family: Acanthisittidae

Scientific name: *Acanthisitta chloris*

Common name: Rifleman

No. 45

Order: Phoenicopteriformes

Family: Phoenicopteridae

Scientific name: *Phoenicopterus ruber ruber*

Common name: Flamingo

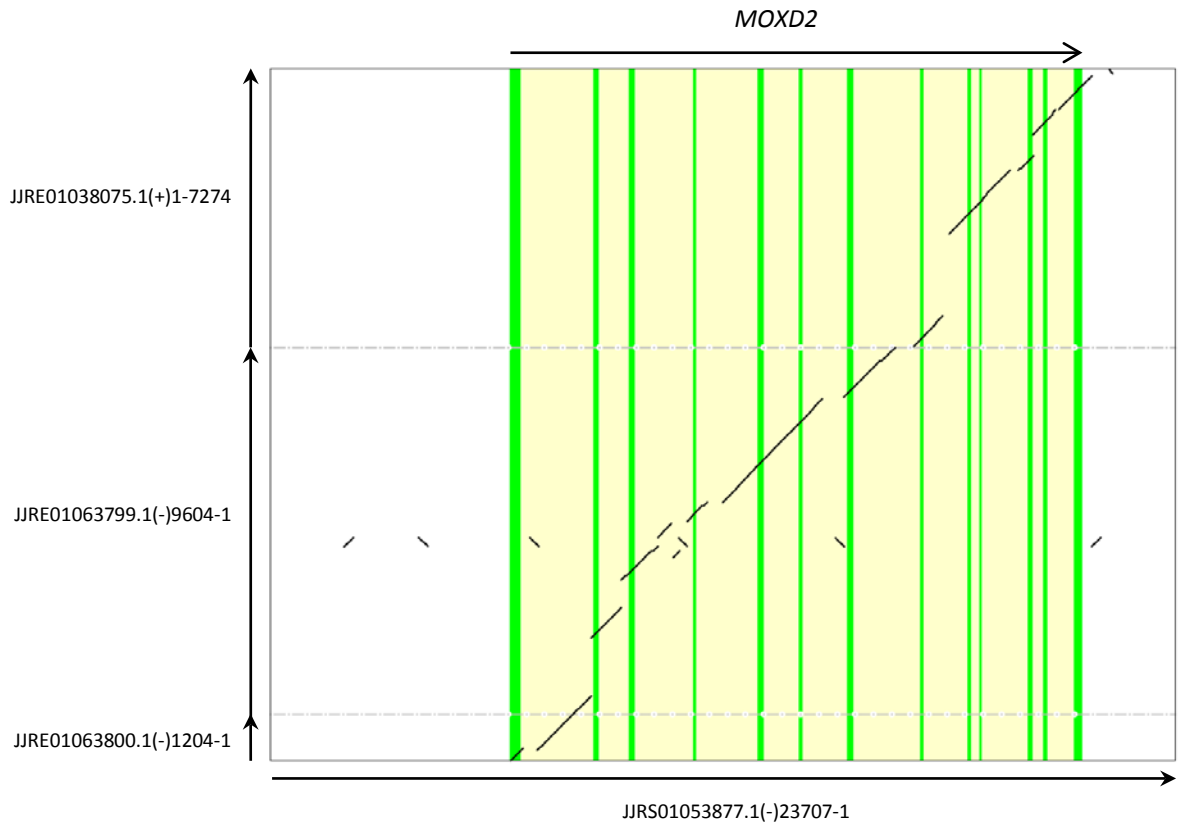

Order: Passeriformes

Family: Acanthisittidae

Scientific name: *Acanthisitta chloris*

Common name: Rifleman

No. 46

Order: Podicipediformes

Family: Podicipedidae

Scientific name: *Podiceps cristatus*

Common name: Great crested grebe

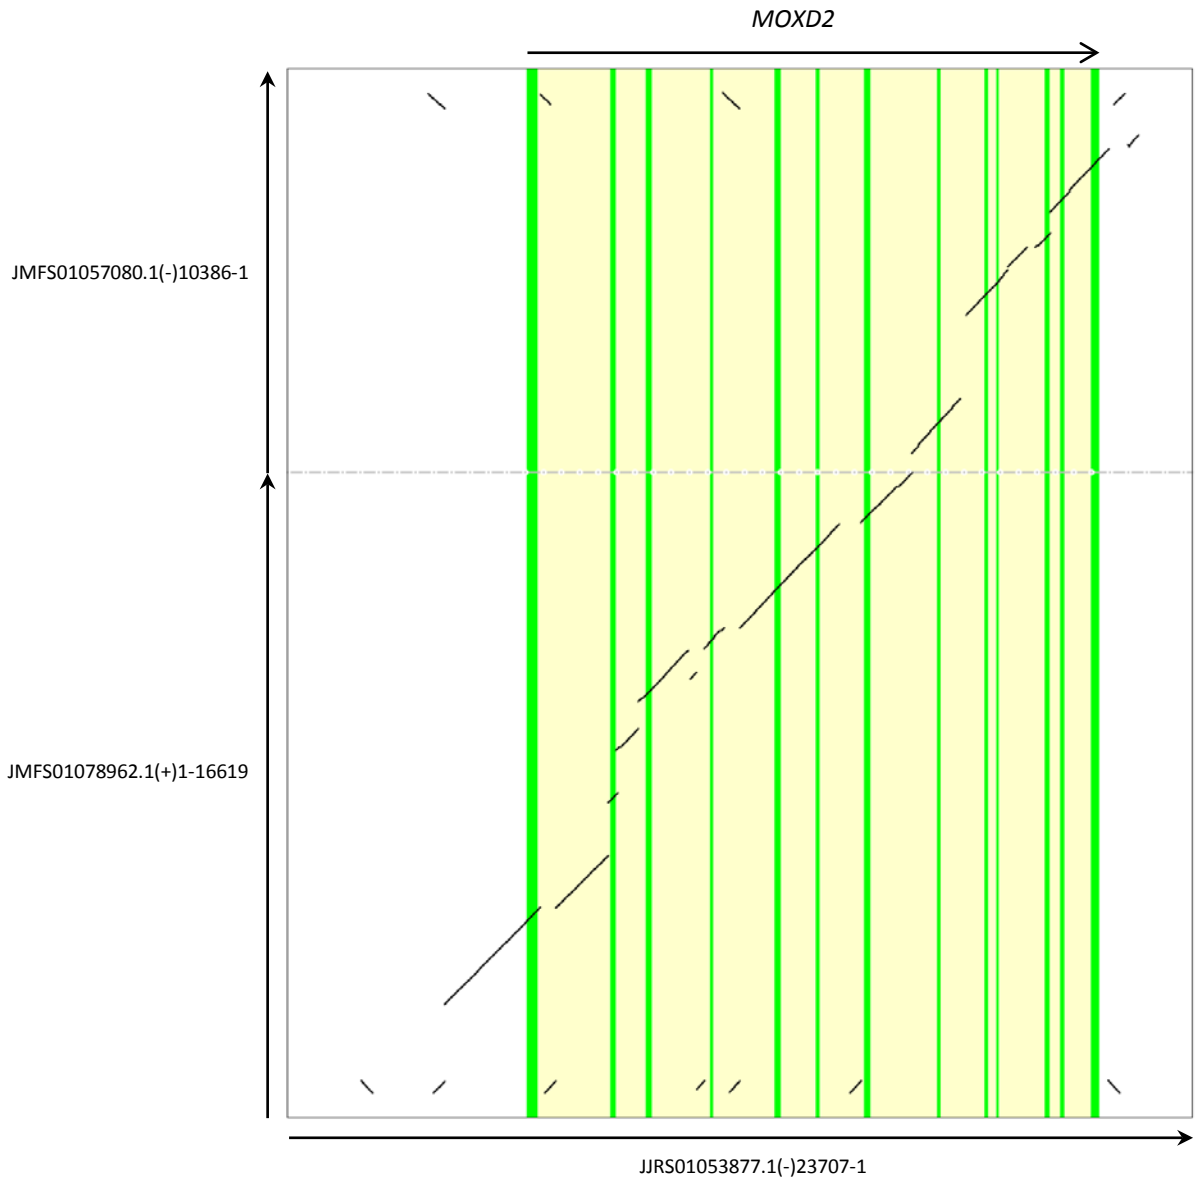

Order: Passeriformes

Family: Acanthisittidae

Scientific name: *Acanthisitta chloris*

Common name: Rifleman

No. 47  
Order: Columbiformes  
Family: Columbidae  
Scientific name: *Columba livia*  
Common name: Rock pigeon

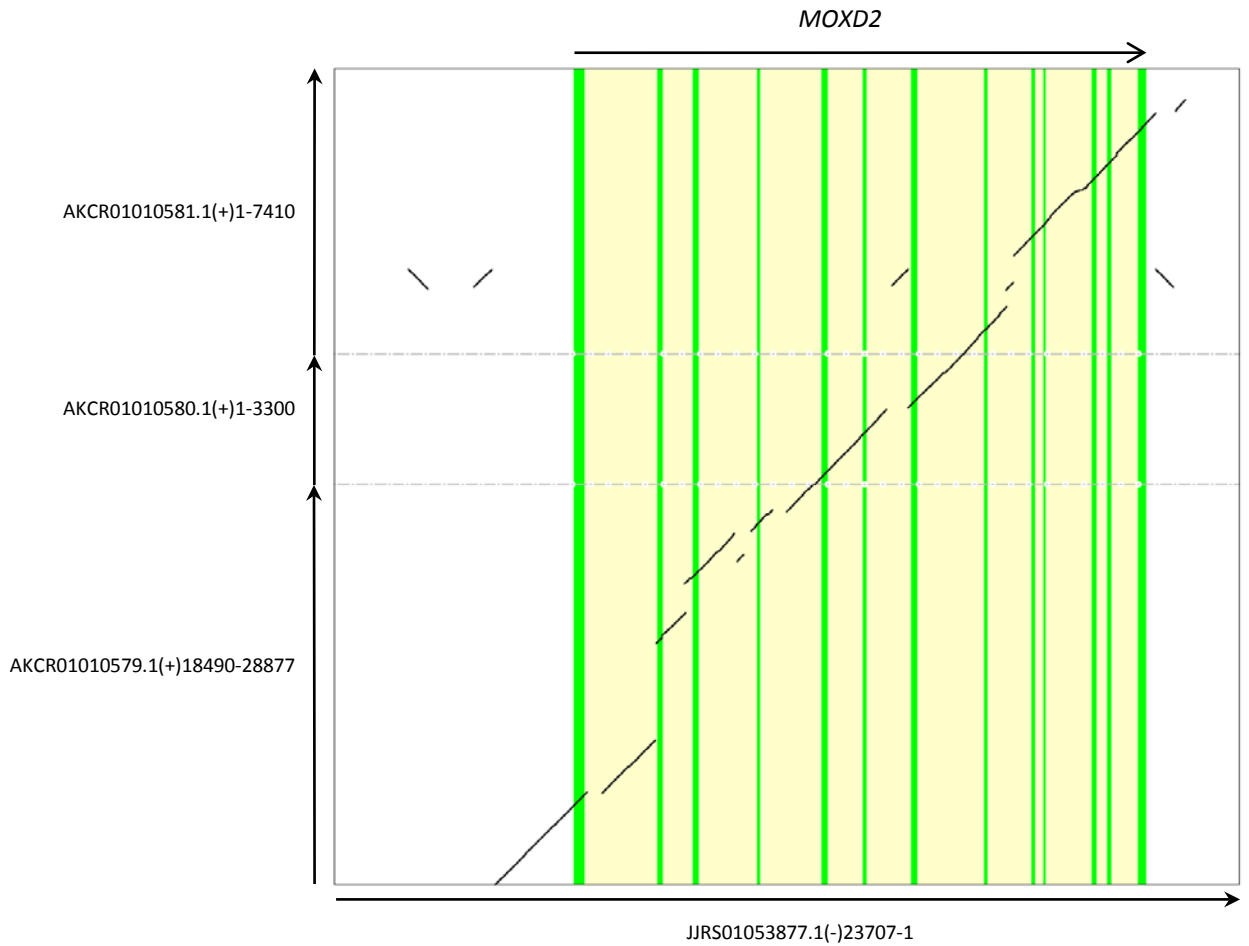

Order: Passeriformes  
Family: Acanthisittidae  
Scientific name: *Acanthisitta chloris*  
Common name: Rifleman

No. 48

Order: Pteroclidiformes

Family: Pteroclididae

Scientific name: *Pterocles gutturalis*

Common name: Yellow-throated sandgrouse

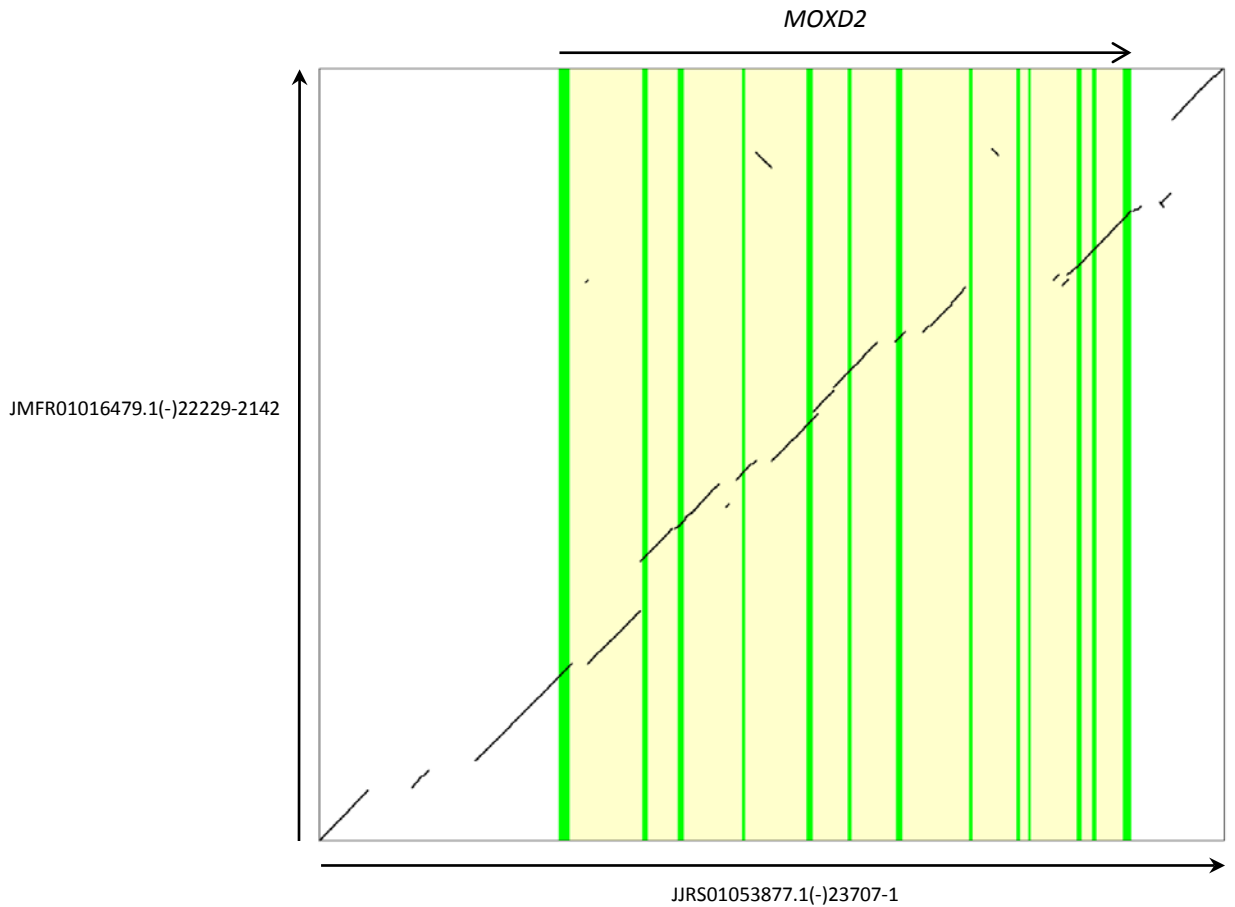

Order: Passeriformes

Family: Acanthisittidae

Scientific name: *Acanthisitta chloris*

Common name: Rifleman



No. 49

Order: Mesitornithiformes

Family: Mesitornithidae

Scientific name: *Mesitornis unicolor*

Common name: Brown mesite

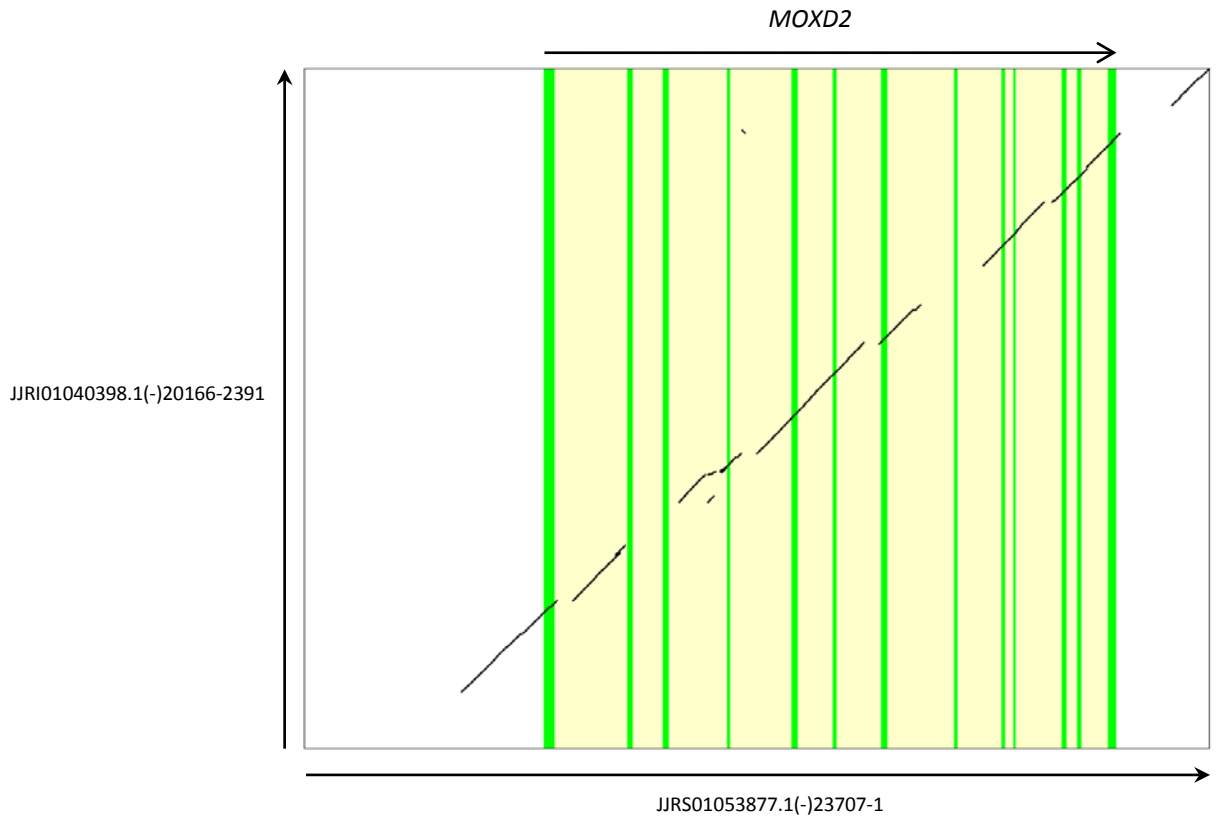

Order: Passeriformes

Family: Acanthisittidae

Scientific name: *Acanthisitta chloris*

Common name: Rifleman

No. 50  
Order: Anseriformes  
Family: Anatidae  
Scientific name: *Anas platyrhynchos*  
Common name: Mallard

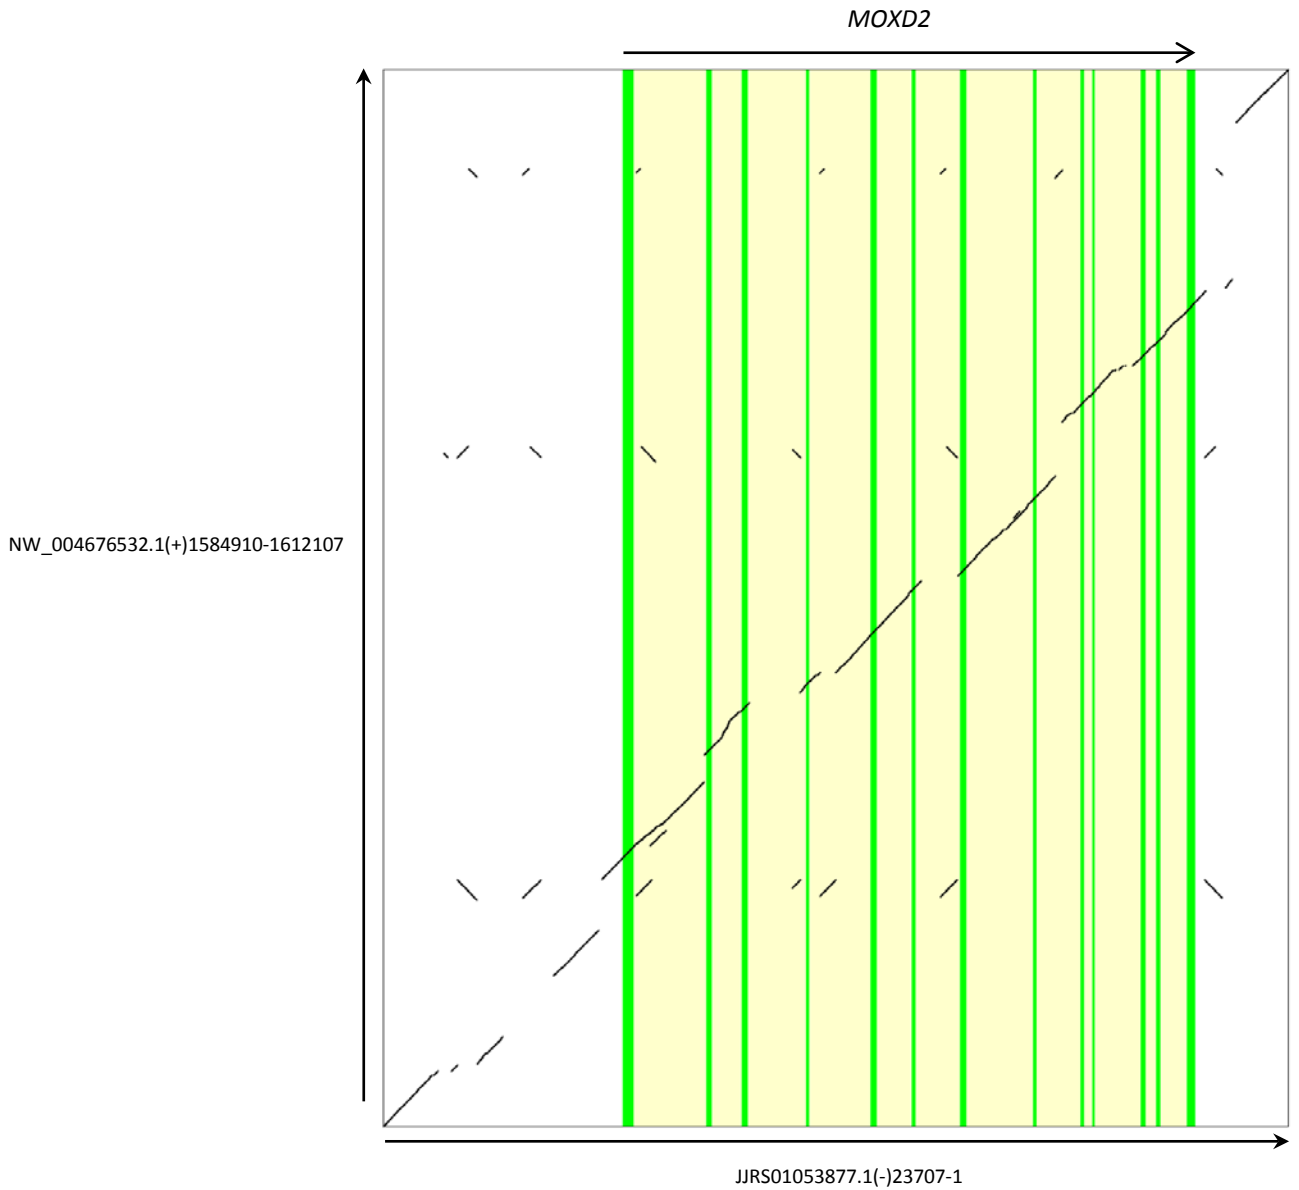

Order: Passeriformes  
Family: Acanthisittidae  
Scientific name: *Acanthisitta chloris*  
Common name: Rifleman

No. 51

Order: Galliformes

Family: Odontophoridae

Scientific name: *Colinus virginianus*

Common name: Northern bobwhite

No *MOXD2* sequence

No. 52

Order: Galliformes

Family: Phasianidae

Scientific name: *Coturnix japonica*

Common name: Japanese quail

No *MOXD2* sequence

No. 53

Order: Galliformes

Family: Phasianidae

Scientific name: *Gallus gallus*

Common name: Chicken

No *MOXD2* sequence

No. 54

Order: Galliformes

Family: Phasianidae

Scientific name: *Meleagris gallopavo*

Common name: Wild turkey

No *MOXD2* sequence

No. 55

Order: Galliformes

Family: Phasianidae

Scientific name: *Tetrao (Lyrurus) tetrix tetrix*

Common name: Black grouse

No *MOXD2* sequence

No. 56

Order: Tinamiformes

Family: Tinamidae

Scientific name: *Tinamus guttatus*

Common name: White-throated tinamou

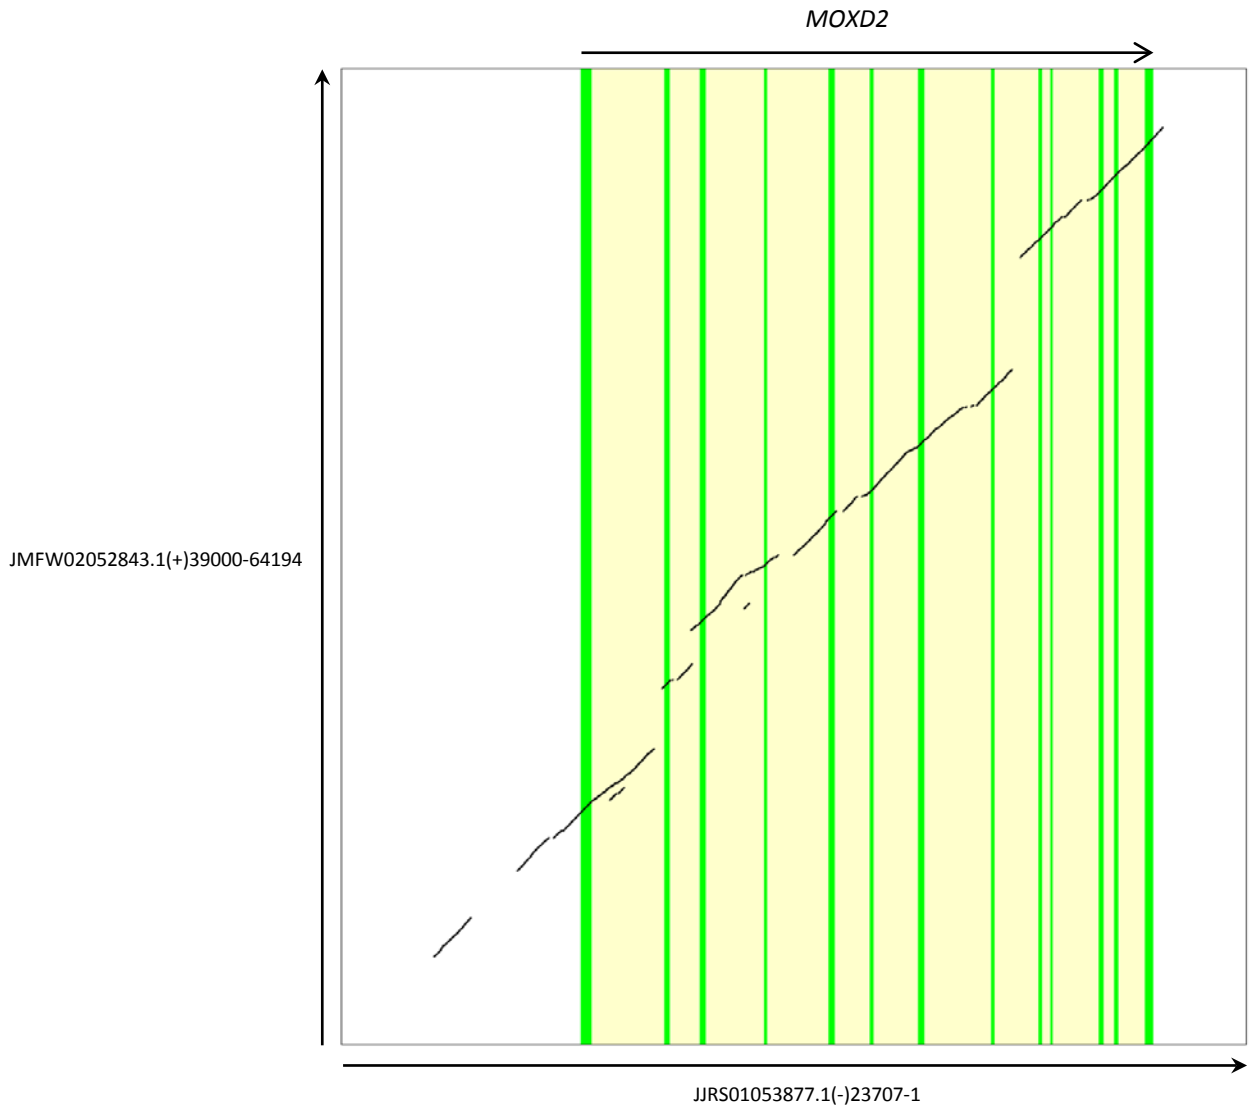

Order: Passeriformes

Family: Acanthisittidae

Scientific name: *Acanthisitta chloris*

Common name: Rifleman



No. 57

Order: Struthioniformes

Family: Struthionidae

Scientific name: *Struthio camelus australis*

Common name: African ostrich

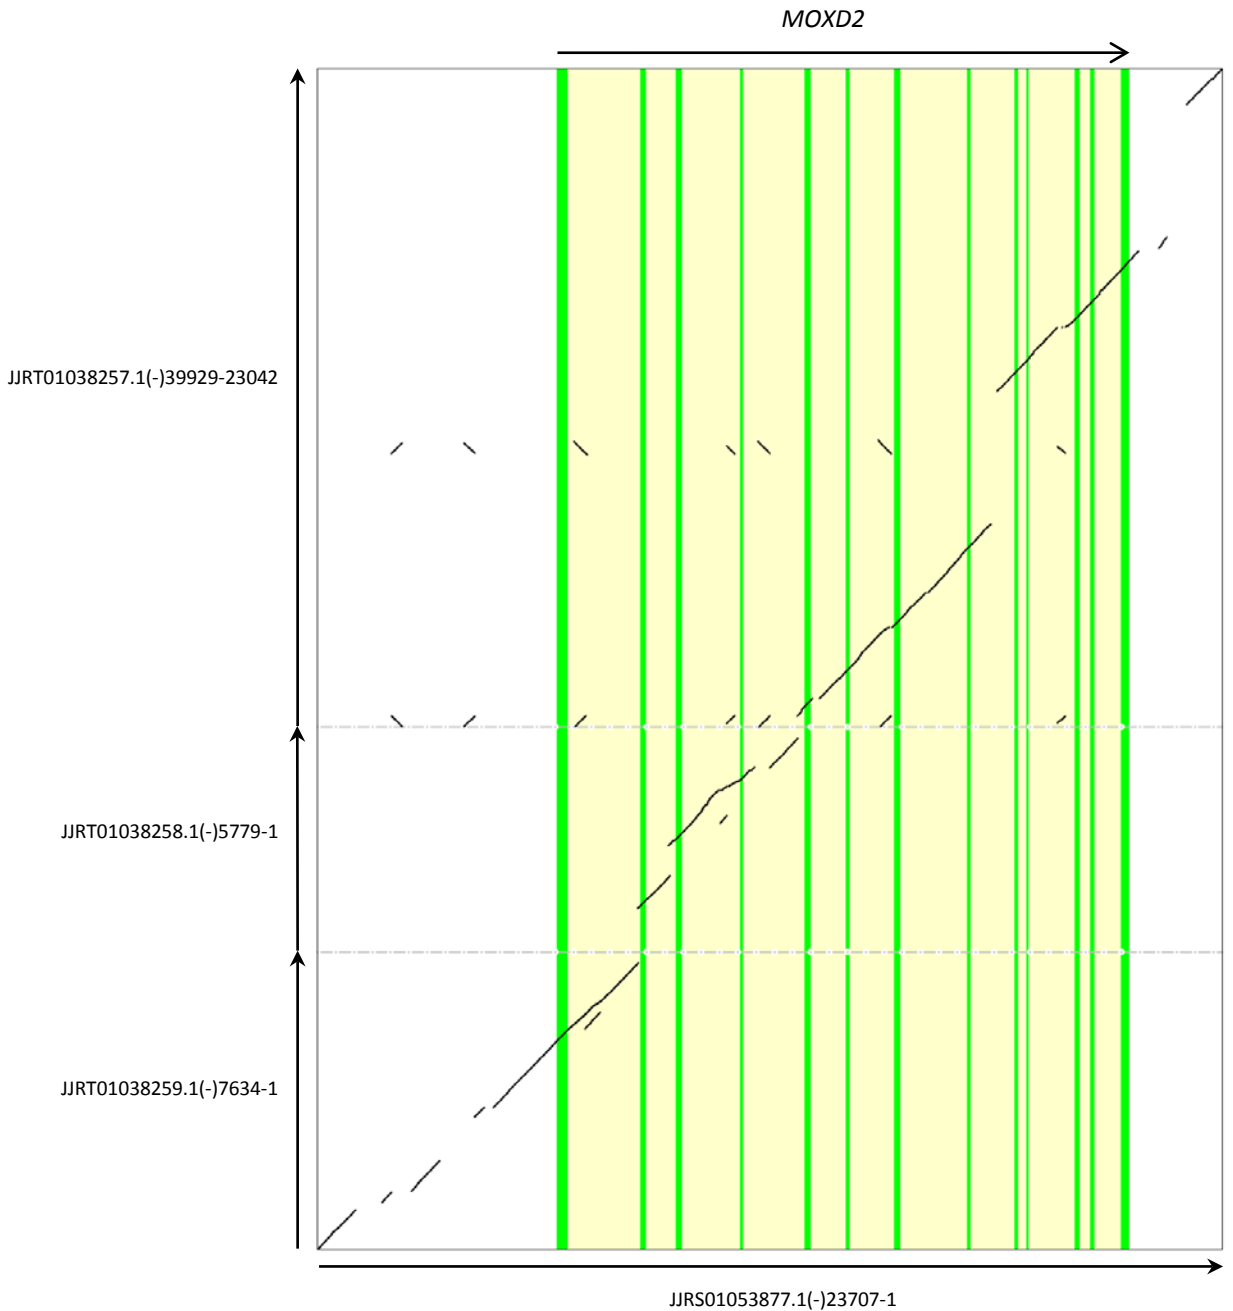

Order: Passeriformes

Family: Acanthisittidae

Scientific name: *Acanthisitta chloris*

Common name: Rifleman
