# Supplementary material for: MOXD2, a Gene Possibly Associated with Olfaction, Is Frequently Inactivated in Birds
Source: PubMed Central journal article supplement (PMC4830563; doi:10.1371/journal.pone.0152431), 2016-04-13
Supplement: pone.0152431.s006.pdf [file pone.0152431.s006.pdf]

## S6 Fig. Dotplot comparison of the downy woodpecker and Northern carmine bee-eater *MOXD2* loci

No. 18

Order: Piciformes

Family: Picidae

Scientific name: *Picoides pubescens*

Common name: Downy woodpecker

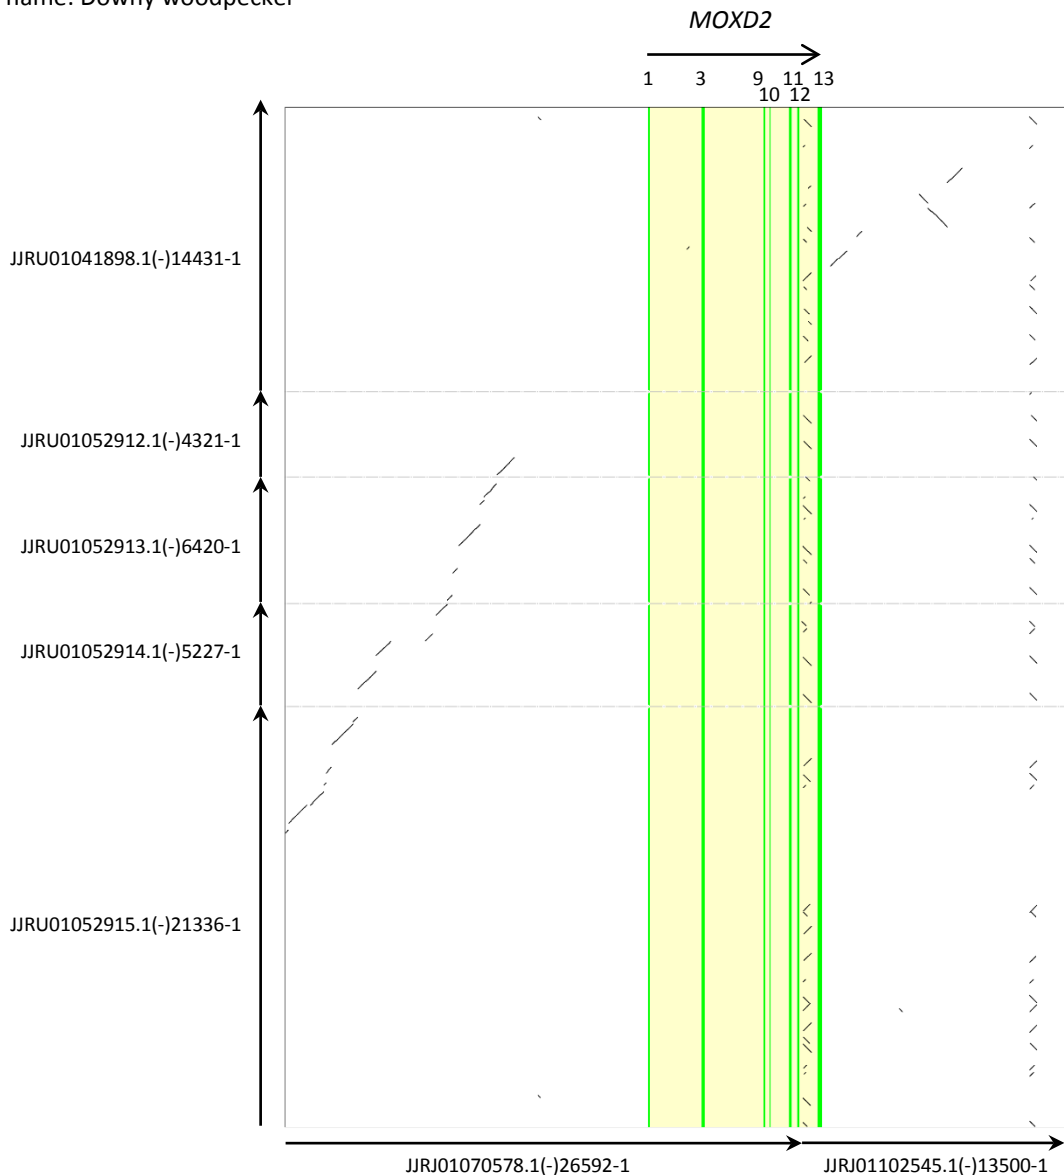

No. 19

Order: Coraciiformes

Family: Meropidae

Scientific name: *Merops nubicus*

Common name: Northern carmine bee-eater
