# Supplementary material for: MOXD2, a Gene Possibly Associated with Olfaction, Is Frequently Inactivated in Birds
Source: PubMed Central journal article supplement (PMC4830563; doi:10.1371/journal.pone.0152431), 2016-04-13
Supplement: pone.0152431.s007.pdf [file pone.0152431.s007.pdf]

# S7 Fig. Dotplot comparison of the chicken and mallard *MOXD2* loci

No. 53  
Order: Galliformes  
Family: Phasianidae  
Scientific name: *Gallus gallus*  
Common name: Chicken

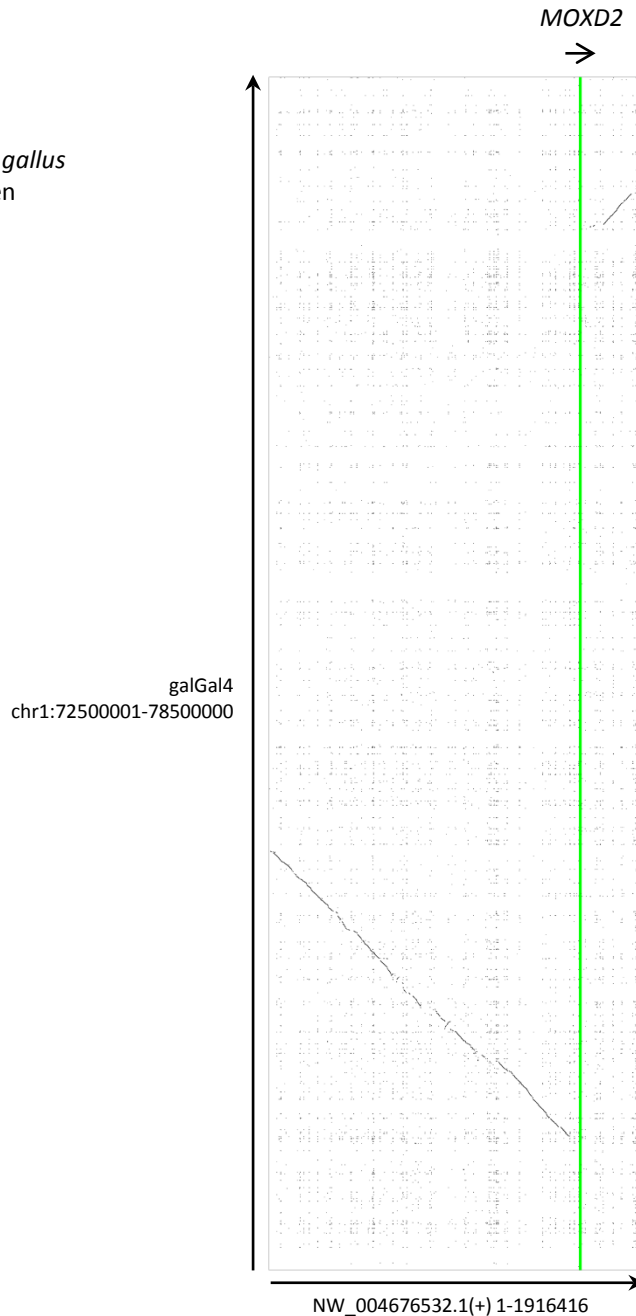

No. 50  
Order: Anseriformes  
Family: Anatidae  
Scientific name: *Anas platyrhynchos*  
Common name: Mallard
